# Supplementary material
Source: PubMed Central journal article supplement (PMC4453775)
Supplement: supp_pp.15.00025_00025suppdata.pdf [file supp_pp.15.00025_00025suppdata.pdf]

11 A  
12

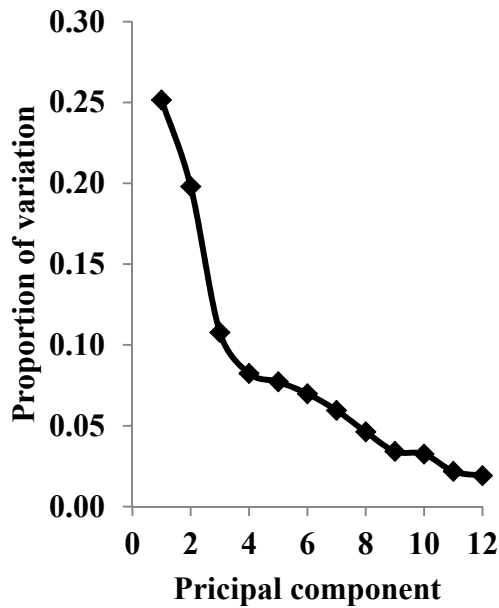

13  
17

14  
15 B  
16

| Metabolite     | Prin1 | Prin2 |
|----------------|-------|-------|
| Chla           | 0.39  | -0.17 |
| Chlb           | 0.19  | 0.04  |
| Mala           | 0.39  | 0.12  |
| Fuma           | 0.33  | 0.25  |
| Glut           | 0.47  | 0.15  |
| AA             | 0.26  | -0.06 |
| Prot           | 0.24  | -0.13 |
| Nitr           | 0.37  | -0.05 |
| Star           | -0.05 | 0.49  |
| Sucr           | 0.18  | 0.36  |
| Gluc           | -0.17 | 0.48  |
| Fruc           | -0.07 | 0.50  |
| % of variation | 25    | 20    |

18 **Figure S1.** Principal component analysis of the 12 metabolites. **(A)** Proportion of variation  
19 explained by each individual principal component. **(B)** Contribution of different metabolites to  
20 the first two principal components. Prin1, first principal component; Prin2, second principal  
21 component; Mala, malate; Fuma, fumarate; Glut, glutamate; Chla, chlorophyll a; Chlb,  
22 chlorophyll b; Nitr, nitrate; Sucr, sucrose; Gluc, glucose; Fruc, fructose; Star, starch; AA, total  
23 amino acids; Prot, protein.

24

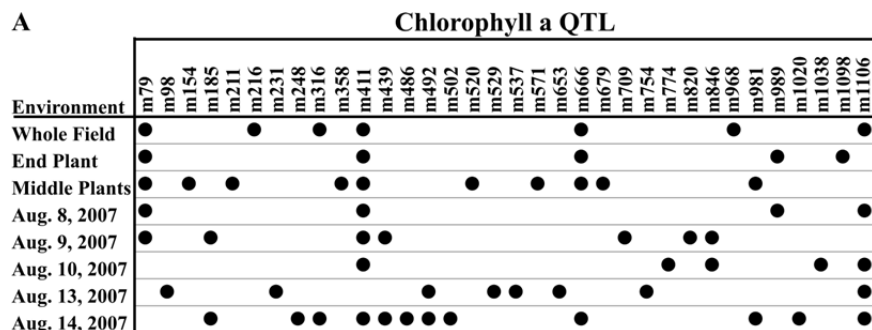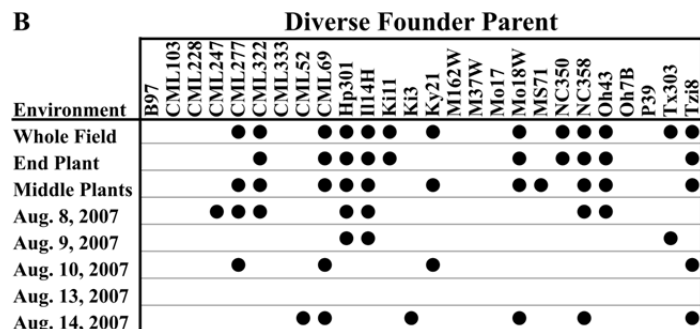

25  
26  
27  
28  
29  
30  
31  
32  
33  
34  
35  
36

**Figure S2.** Sampling effects of subenvironments on QTL discovery. To show how the robustness of QTL discovery, QTL analysis was performed for Chla based on data derived from the whole field or from subenvironments based on the end plant in a row, the middle plants in a row, or the different days of sampling. (A) QTL distribution of Chla derived from different subenvironments. (B) QTL m411 distribution in different NAM families in different subenvironments.

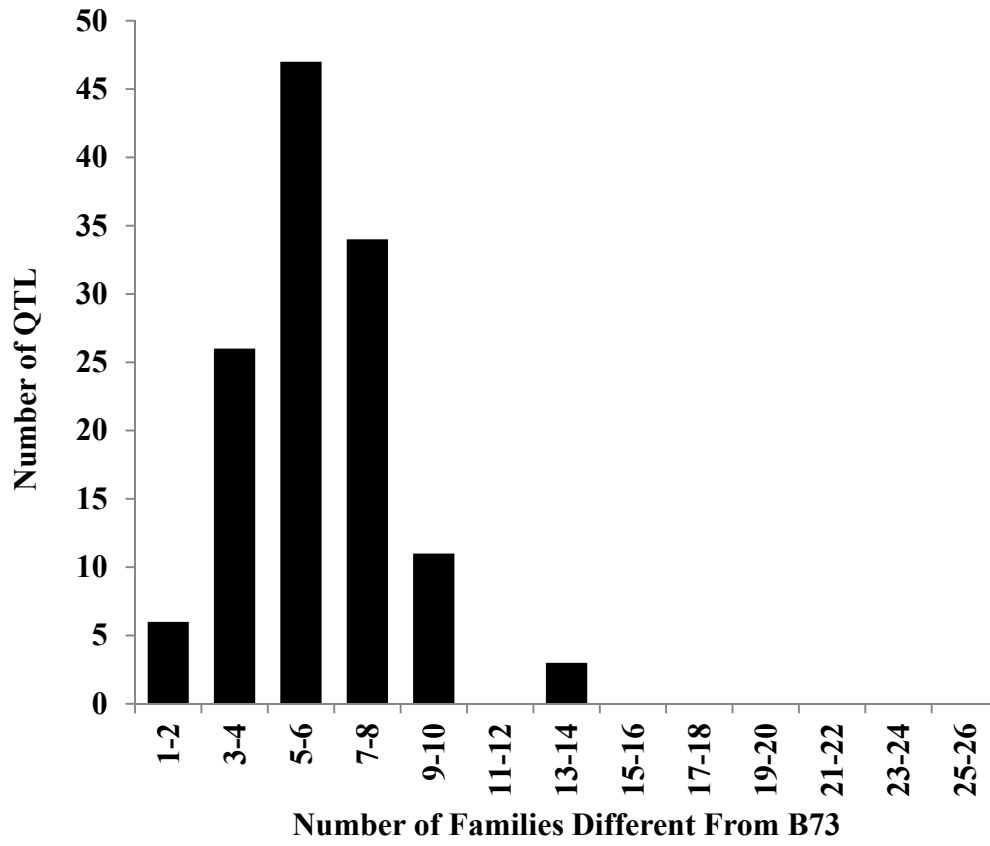

37  
 38  
 39  
 40  
 41  
 42  
 43

**Figure S3.** Distribution of metabolic QTL shared by different families.

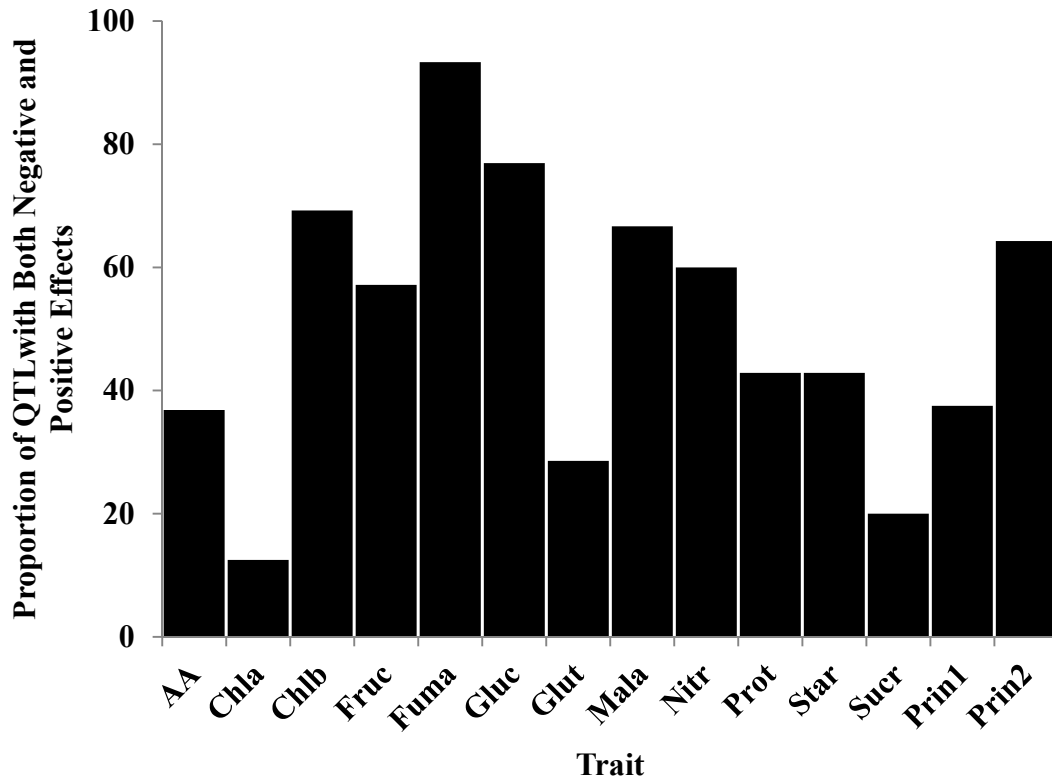

44  
 45  
 46  
 47  
 48  
 49  
 50  
 51

**Figure S4.** Proportion of metabolite and principal component QTL with both negative and positive effects. Mala, malate; Fuma, fumarate; Glut, glutamate; Chla, chlorophyll a; Chlb, chlorophyll b; Nitr, nitrate; Sucr, sucrose; Gluc, glucose; Fruc, fructose; Star, starch; AA, total amino acids; Prot, protein; Prin1, first principal component; Prin2, second principal component

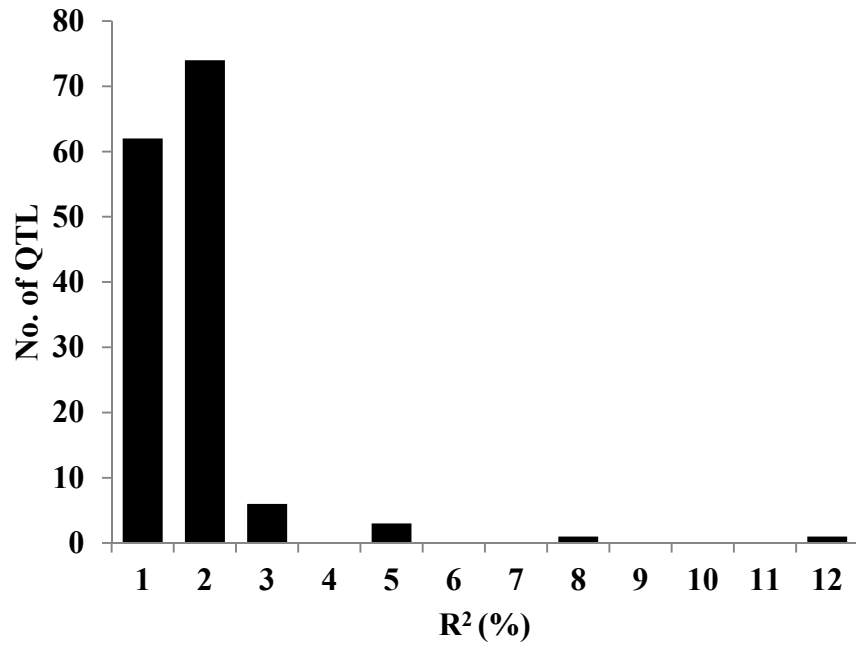

52  
53  
54  
55  
56  
57  
58

**Figure S5.** Histogram of QTL effects for all the 12 metabolites and the first two principal components.

59

60 A

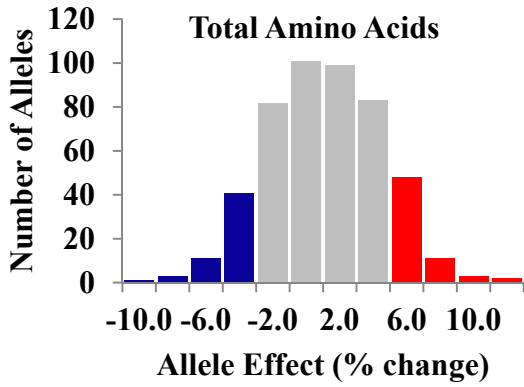

61

62

63 B

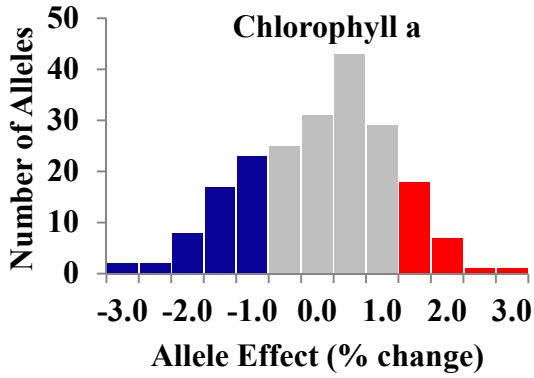

64

65

66 C

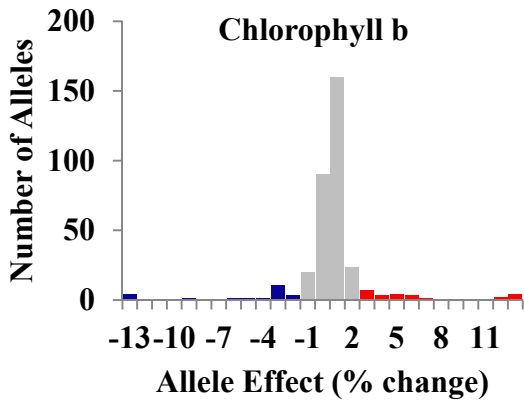

67

68

69

70

71

72

73 D

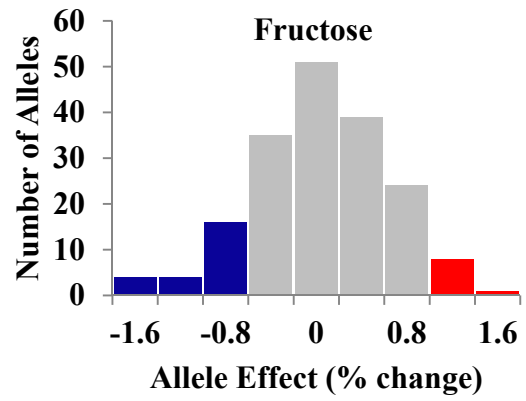

74

75

76 E

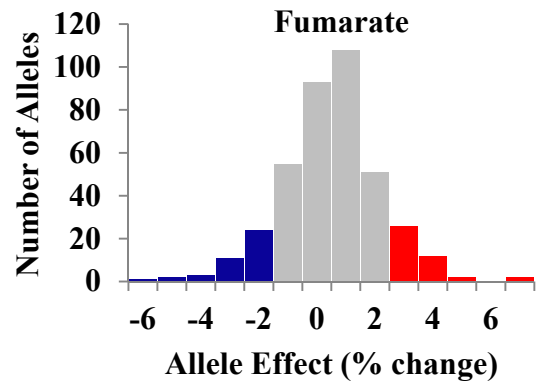

77

78

79 F

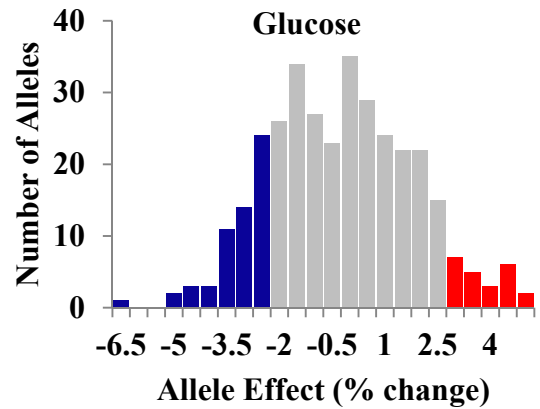

80

81 G

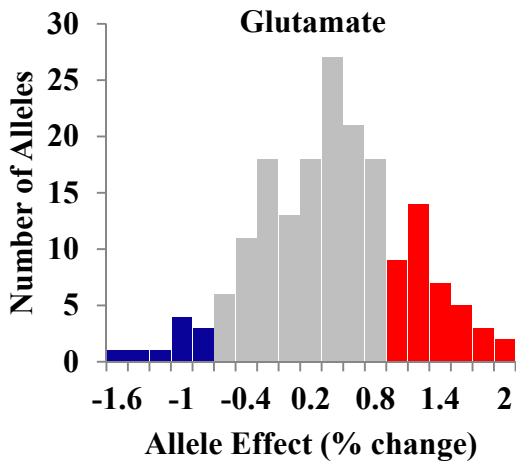

89 J

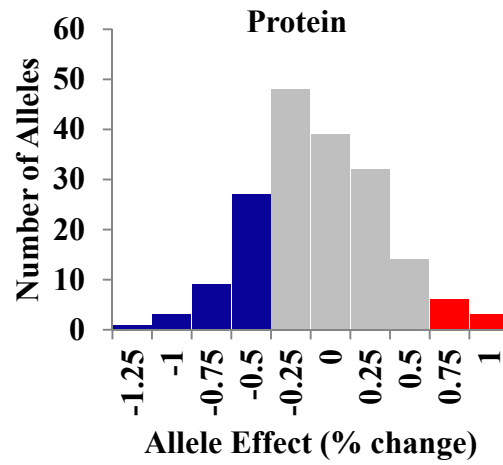

82

90

83

91

84 H

92 K

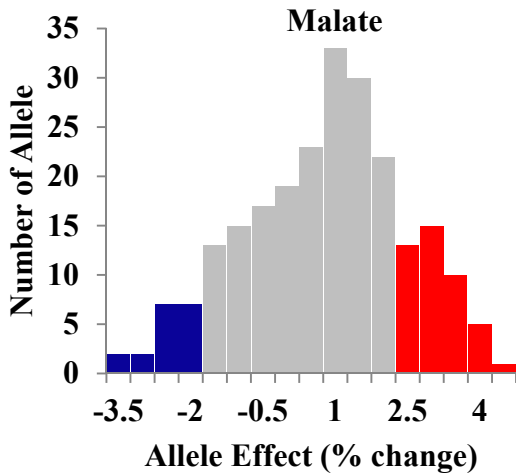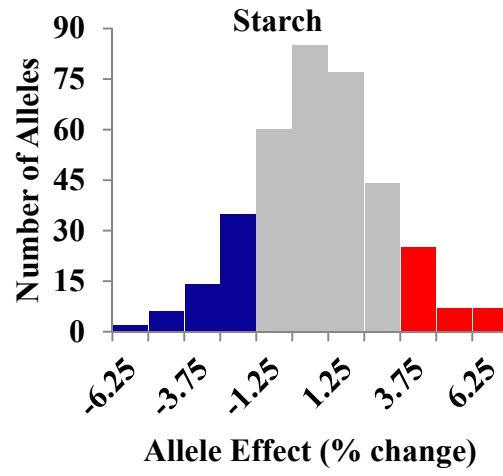

85

93

86

94

87 I

95 L

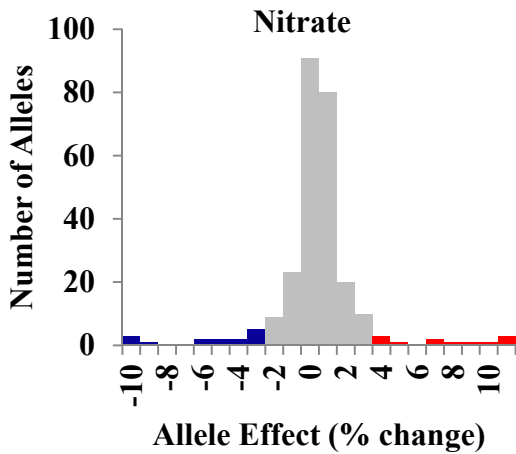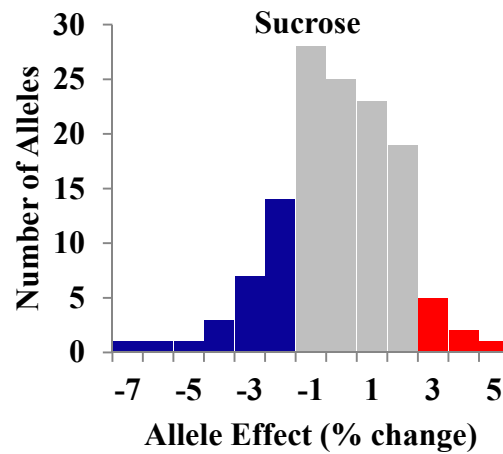

88

96

97 **Figure S6.** Distribution of QTL allele effects for the 12 metabolites. **(A)** Total amino acids. **(B)**  
98 Chlorophyll a. **(C)** Chlorophyll b. **(D)** Fructose. **(E)** Fumarate. **(F)** Glucose. **(G)** Glutamate. **(E)**  
99 **(H)** Malate. **(I)** Nitrate. **(J)** Protein. **(K)** Starch. **(L)** Sucrose. Most of the allele effects are  
100 estimated to be non-significant (grey). The significant positive and negative allele effects are  
101 shown in blue and red.  
102  
103



104

105

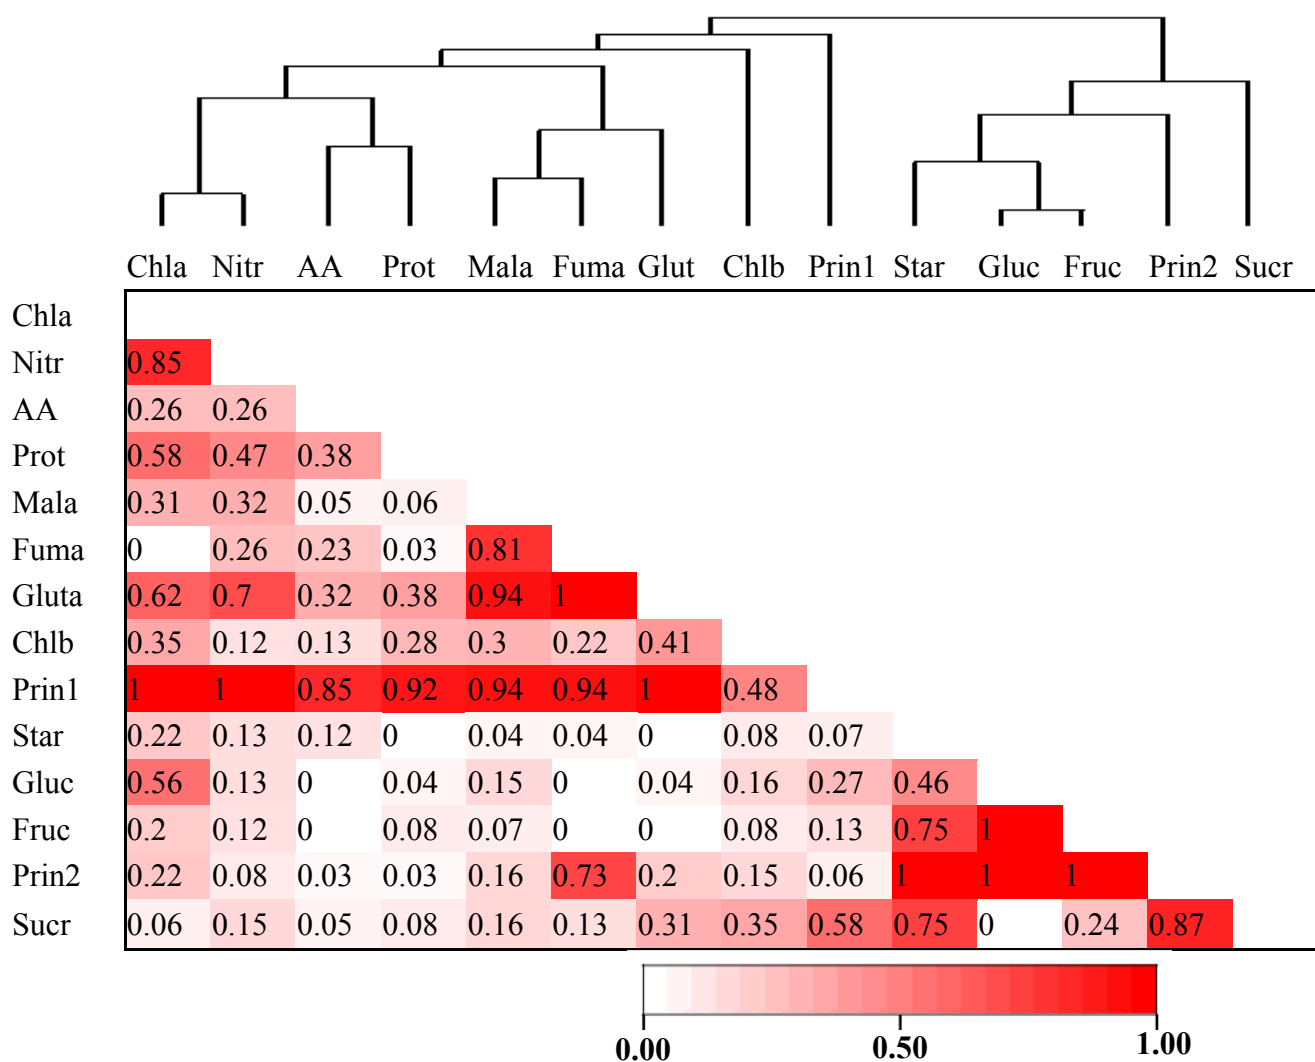

106

107

108 **Figure S7.** Proportion of shared QTL matrix and clusters of the 12 carbon and nitrogen  
 109 metabolites and the first two principal components. Mala, malate; Fuma, fumarate; Glut,  
 110 glutamate; Chla, chlorophyll a; Chlb, chlorophyll b; Nitr, nitrate; Sucr, sucrose; Gluc, glucose;  
 111 Fruc, fructose; Star, starch; AA, total amino acids; Prot, protein; Prin1, first principal component;  
 112 Prin2, second principal component

113

114  
115  
116

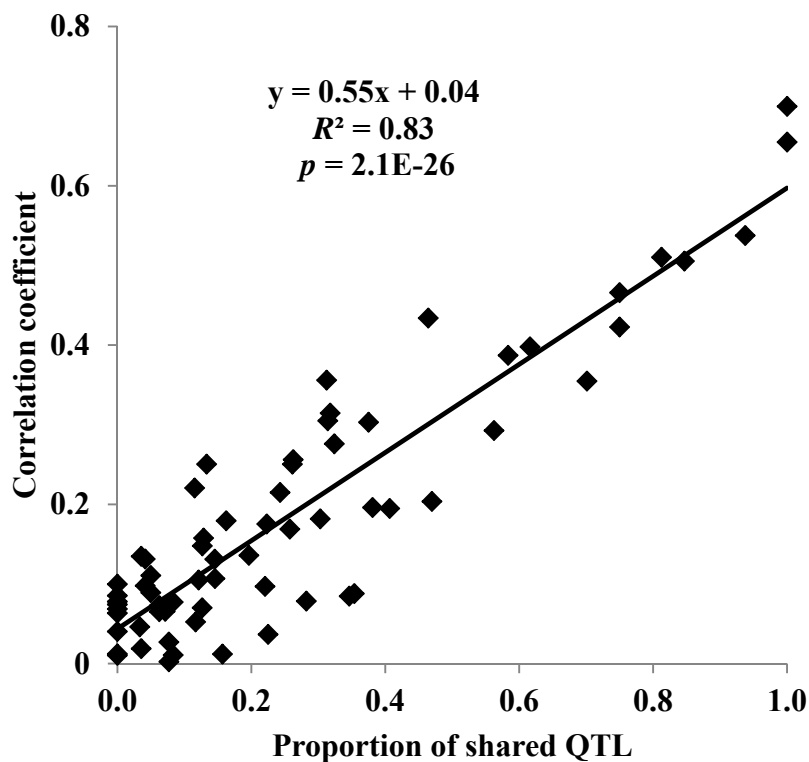

117  
118  
119  
120  
121  
122  
123  
124  
125  
126  
127  
128  
129  
130  
131  
132  
133  
134  
135

**Figure S8.** Relationship between the correlation coefficients of the 12 carbon and nitrogen metabolites and the corresponding proportion of shared QTL. The results demonstrated that metabolites that show correlated changes across the entire NAM population had a significantly higher frequency of shared QTL, which is not the pattern we see in other traits (3, 19).

136

A

### Malate

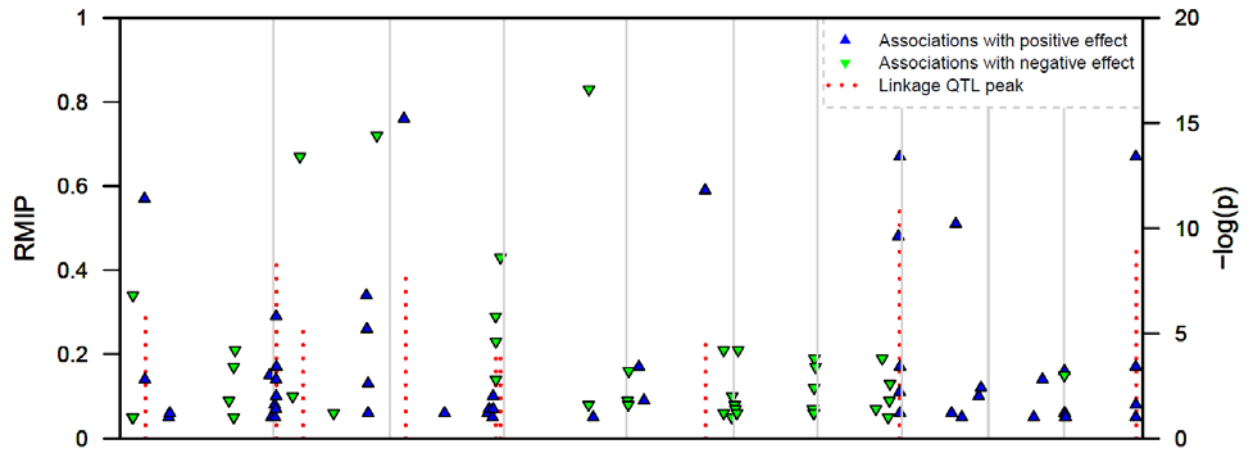

137

138

139

140

B

### Fumarate

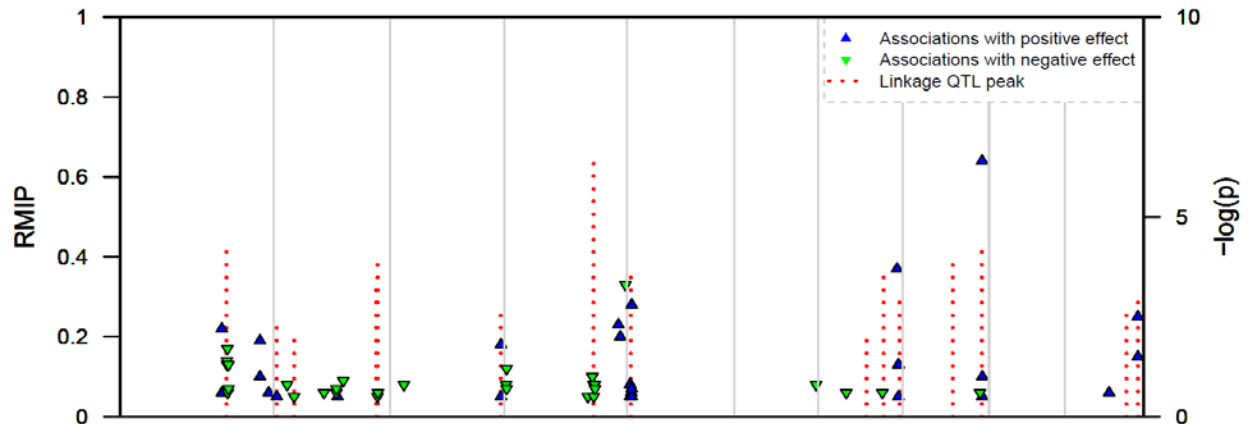

141

142

143

144

C

### Glutamate

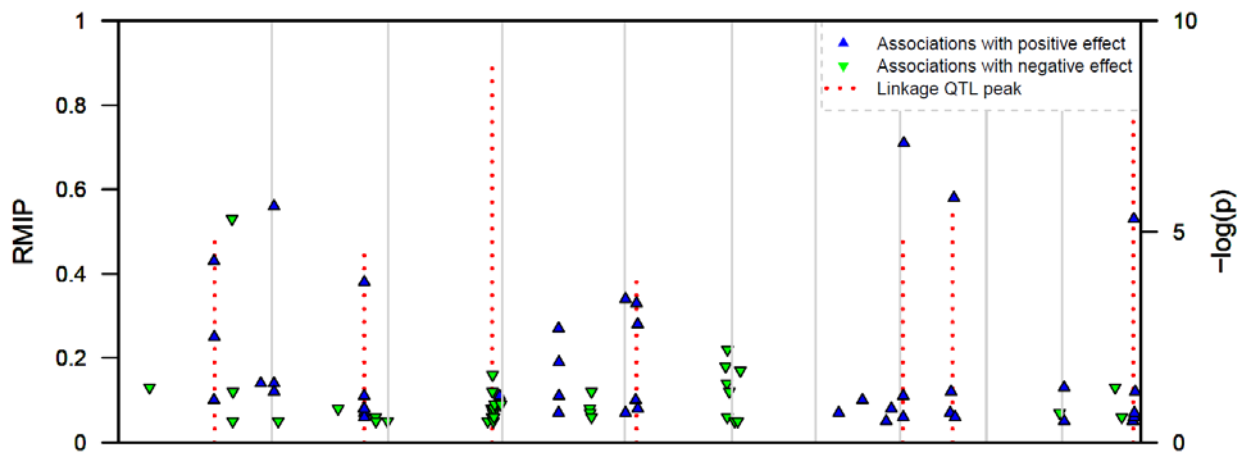

145

146

147

148

**D**

### Chlorophyll b

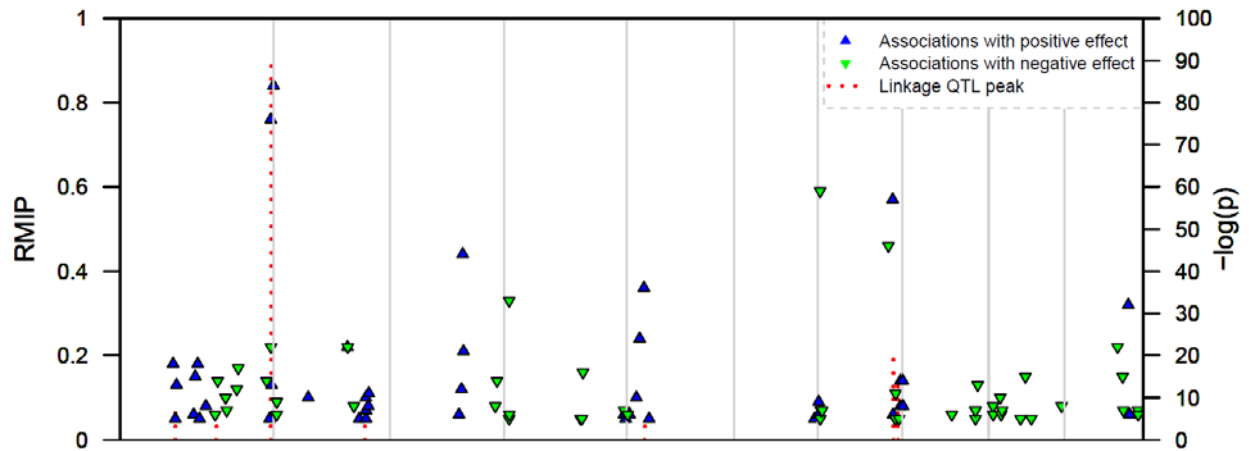

149

150

151

152

**E**

### Nitrate

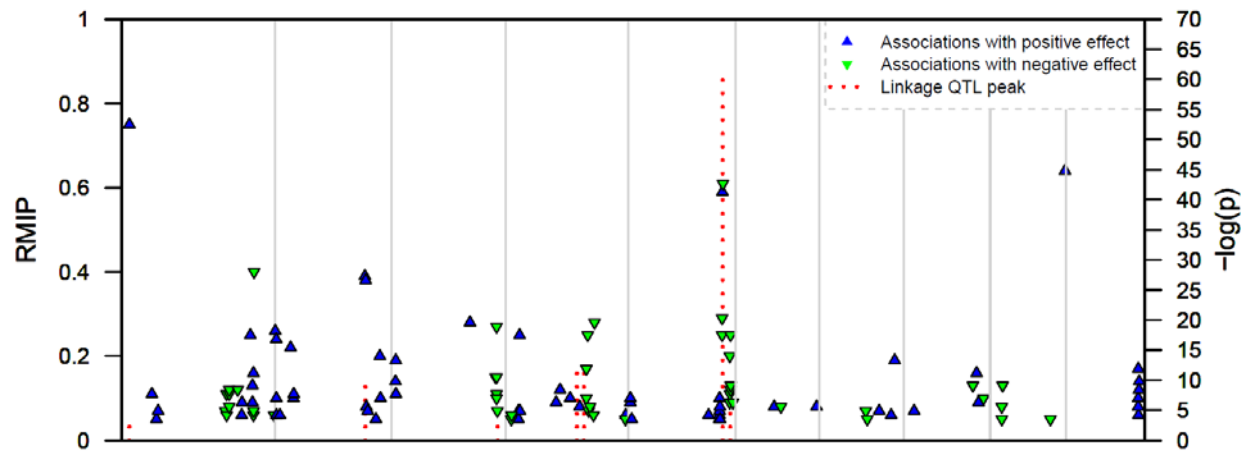

153

154

155

156

**F**

### Total Amino Acids

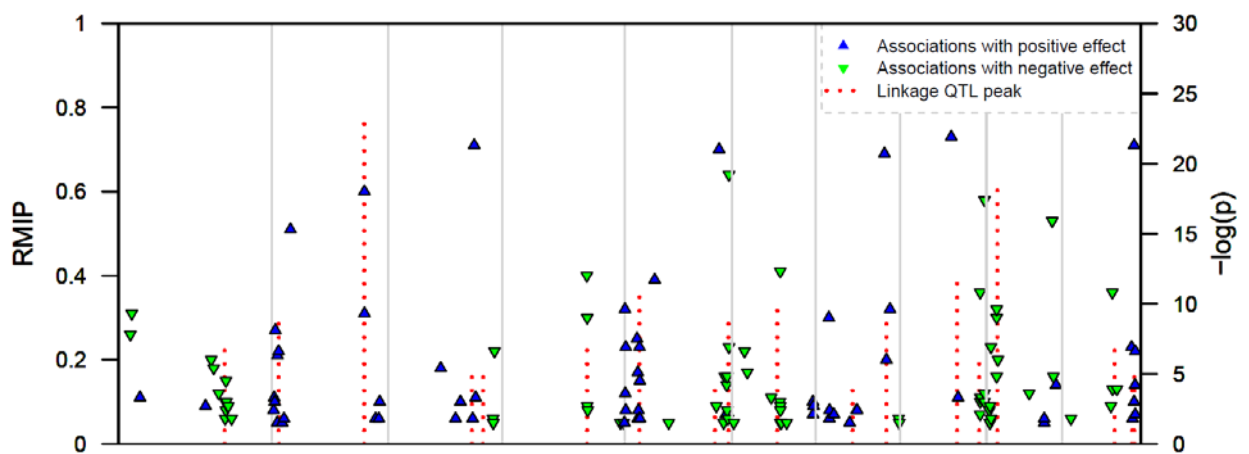

157

158

159

G

### Protein

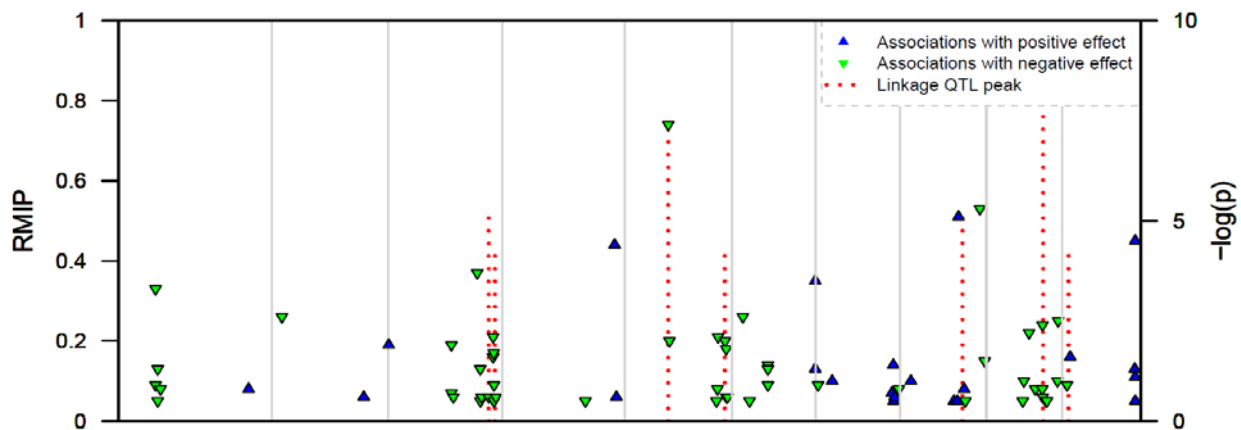

160

161

162

163

H

### Glucose

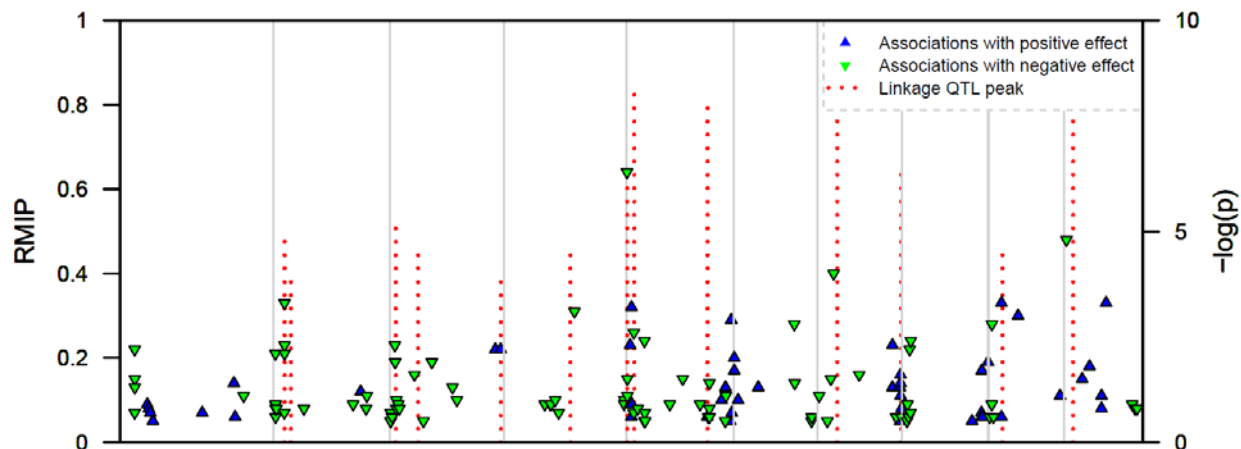

164

165

166

167

I

### Fructose

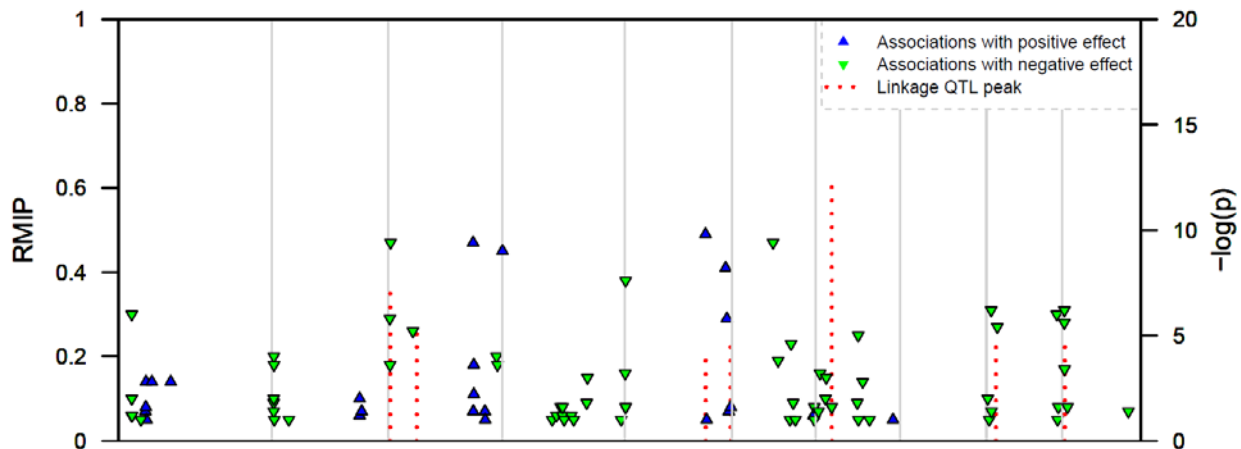

168

169

170

171

**J**

### Sucrose

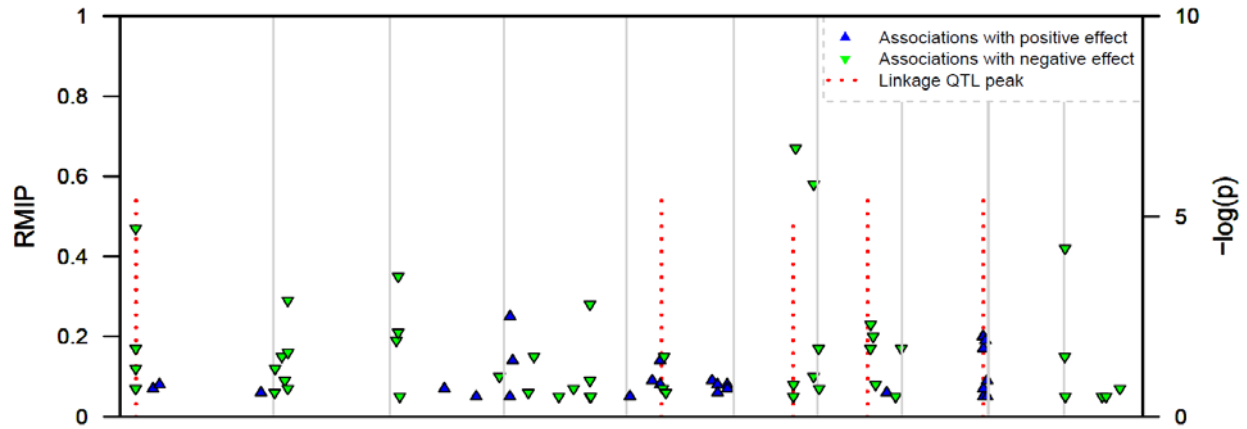

172

173

174

175

**K**

### Prin1

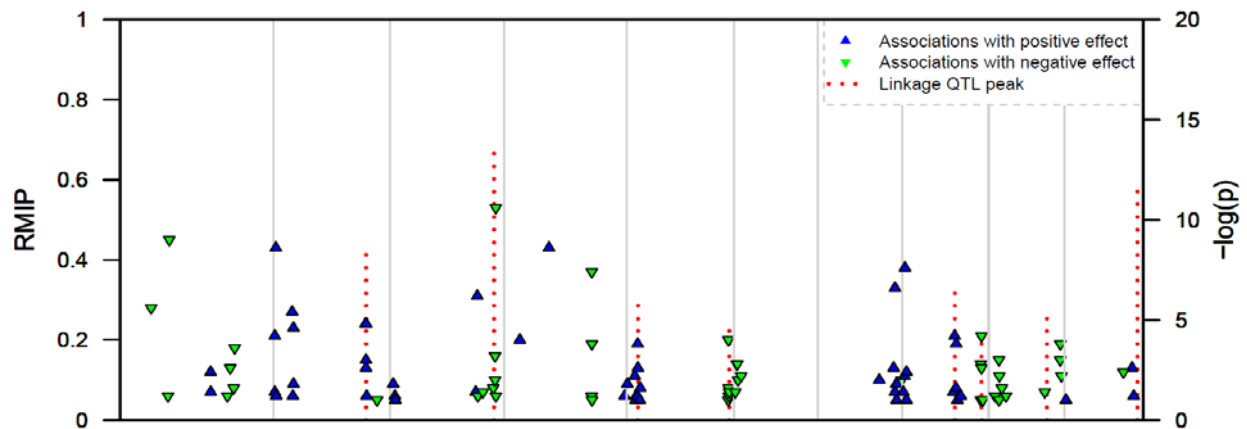

176

177

178

179

**L**

### Prin2

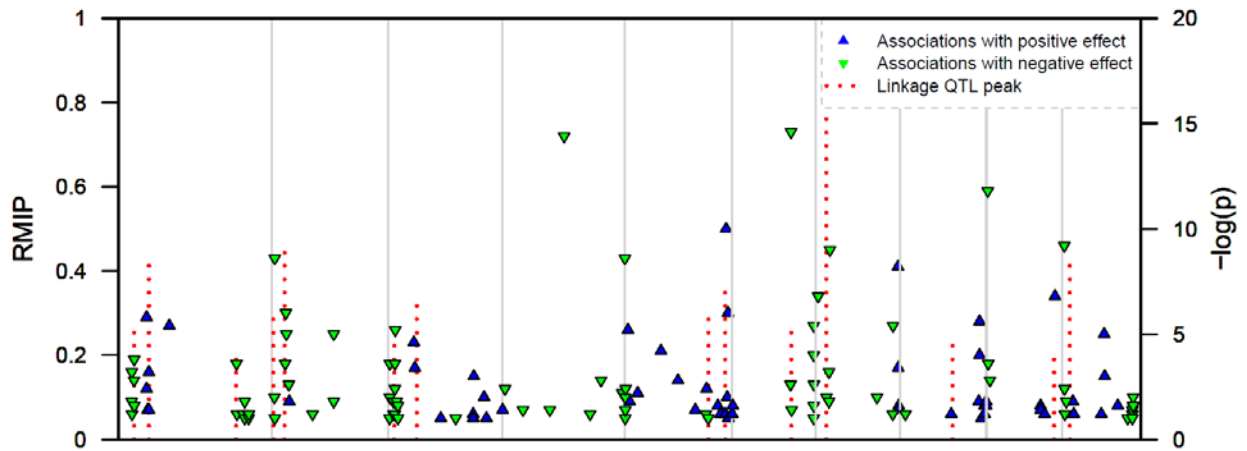

180

181

182

183 **Figure S9.** Overview of GWAS results. All SNPs detected as significant in at least 5 subsamples  
184 are triangles (blue with positive effect and green with negative effect) relative to their physical  
185 sequence position. Vertical positions of triangles represent resample model inclusion probability  
186 (RMIP) of the SNP. QTL, red lines whose vertical positions represent their *F*-test  $\log(1/P)$  in the  
187 final joint linkage QTL model. **(A)** Malate. **(B)** Fumarate. **(C)** Glutamate. **(D)** Chlorophyll b. **(E)**  
188 Nitrate. **(F)** Total amino acids. **(G)** Protein. **(H)** glucose. **(I)** Fructose. **(J)** Sucrose **(K)** First  
189 principal component (Prin1). **(L)** Second Principal component (Prin2).

190

191

192

193

194

195

196

197

198

199  
200  
201 A  
202

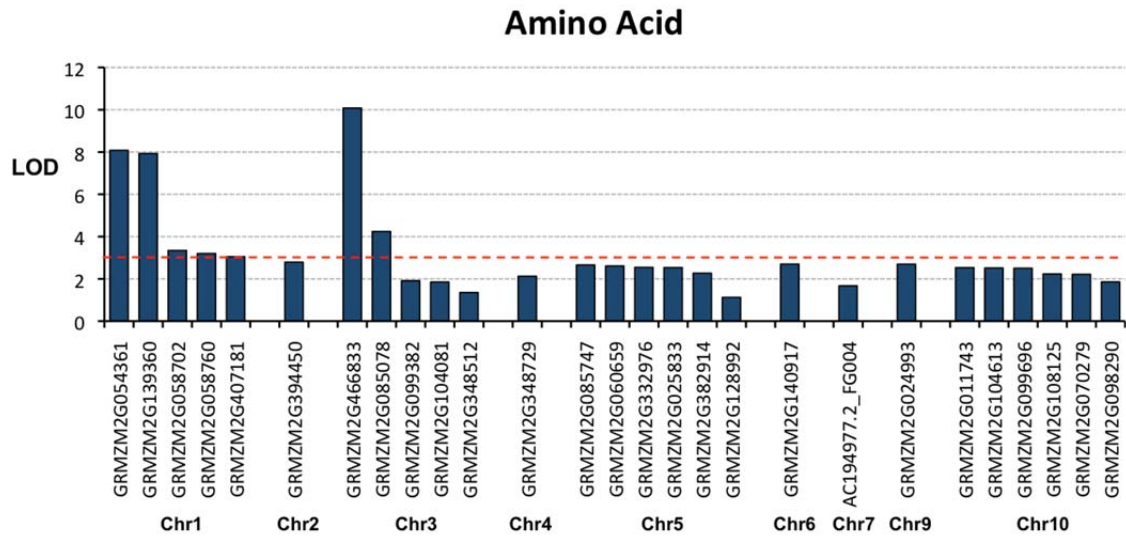

203  
204  
205  
206 B

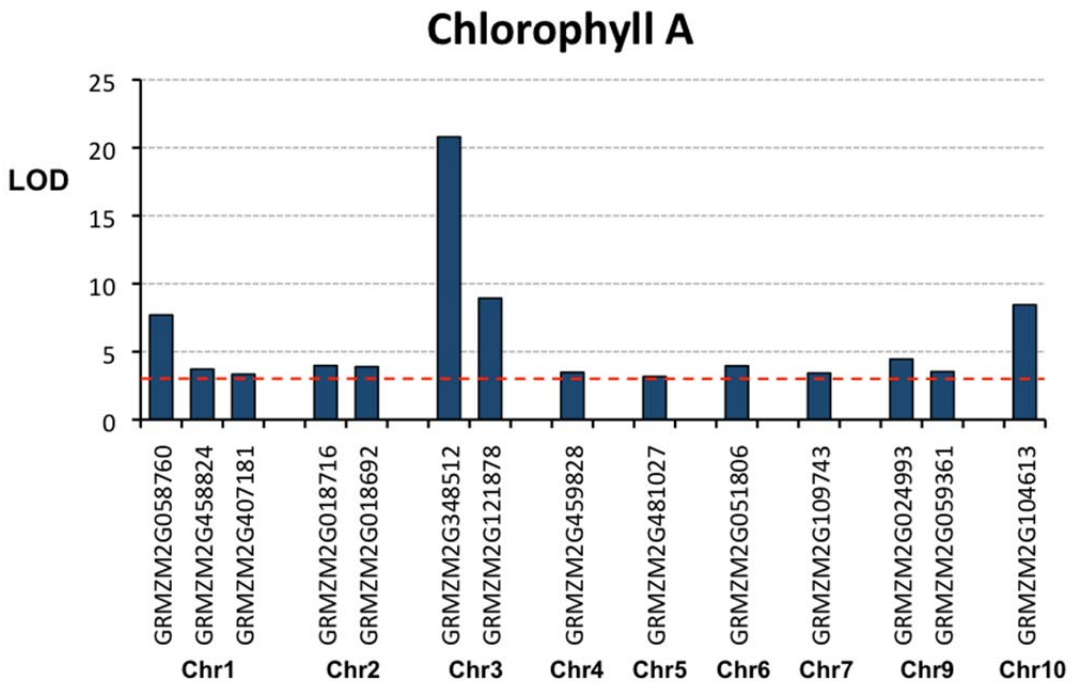

207  
208



209 C  
210

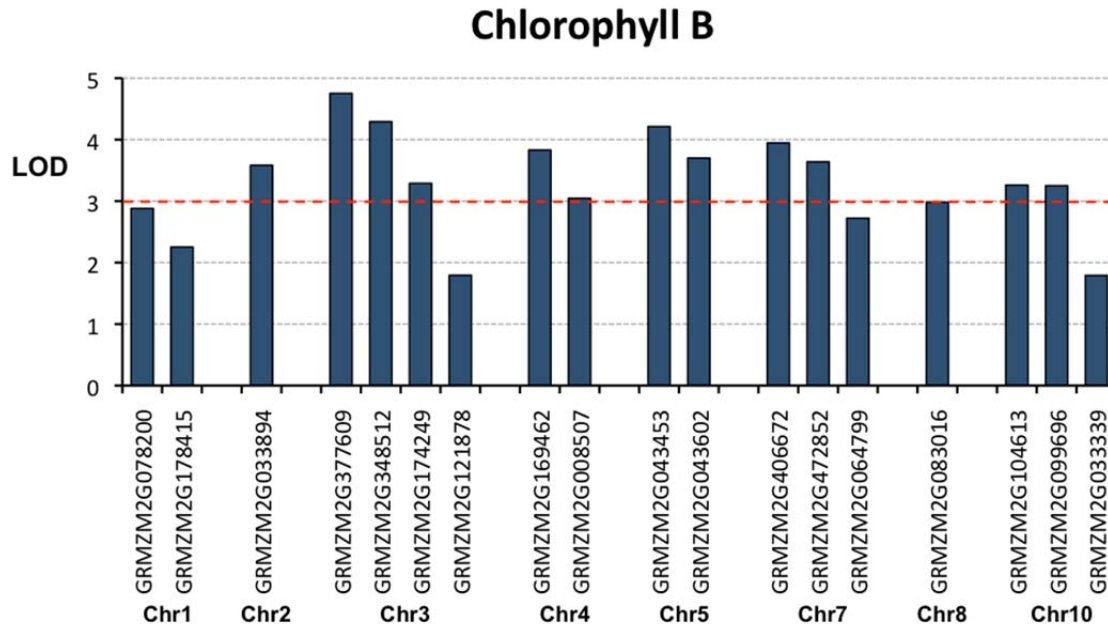

211  
212  
213  
214 D  
215

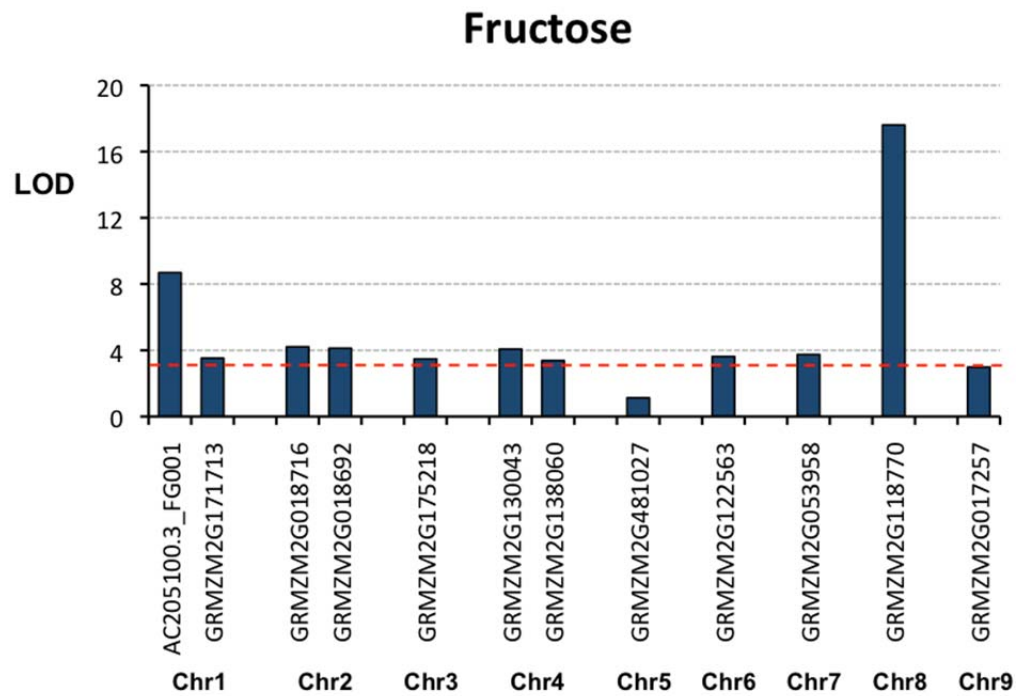

216  
217  
218  
219

220 E  
221

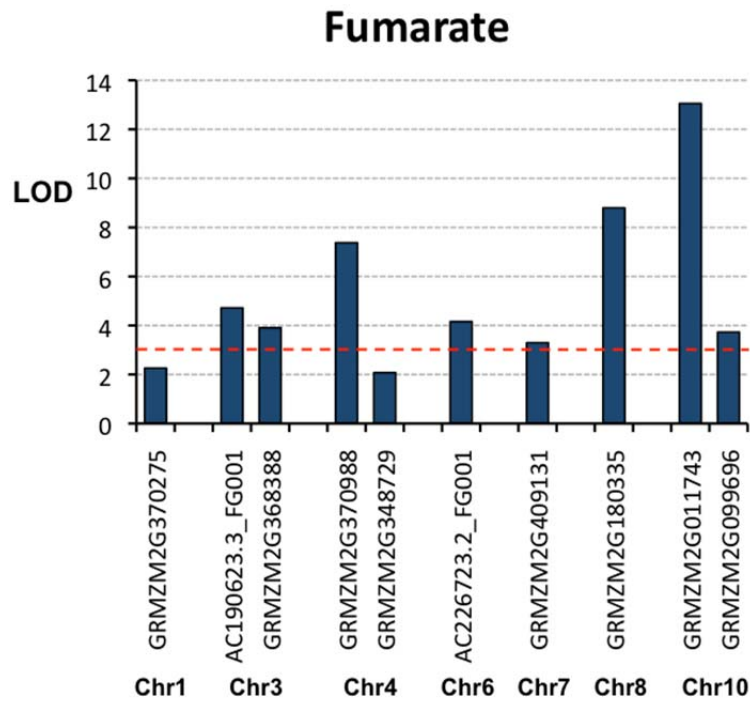

222  
223  
224  
225  
226 F

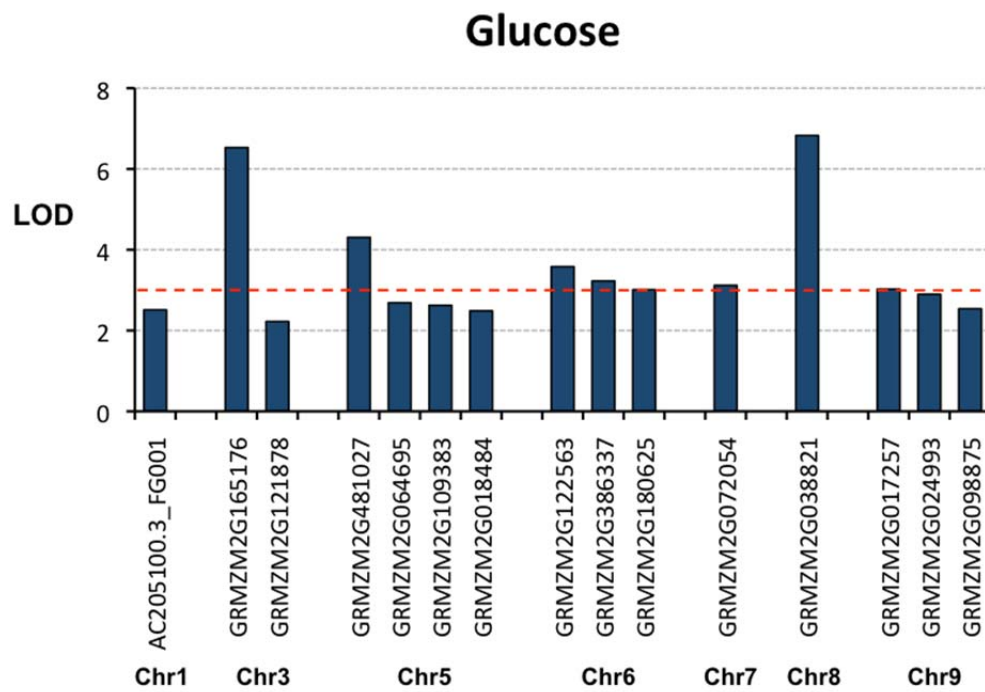

227

228 G  
229

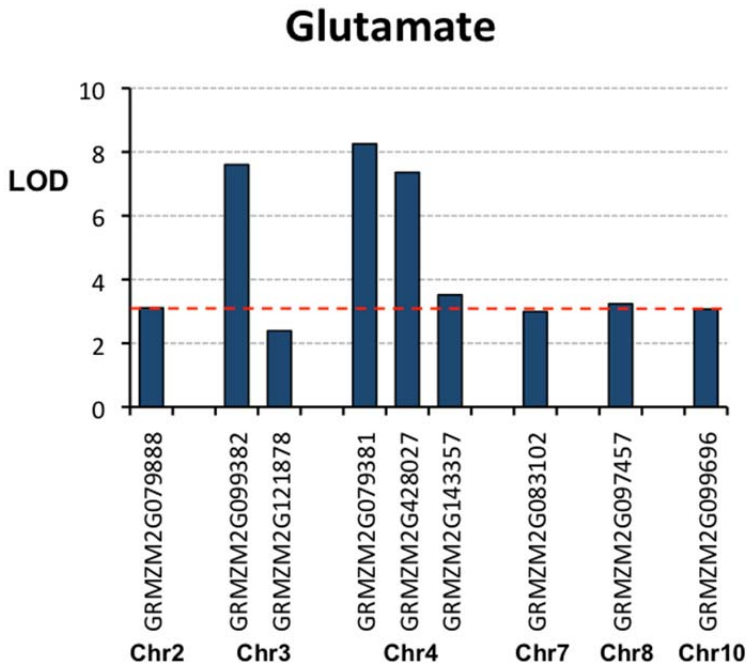

230  
231  
232  
233 H  
234

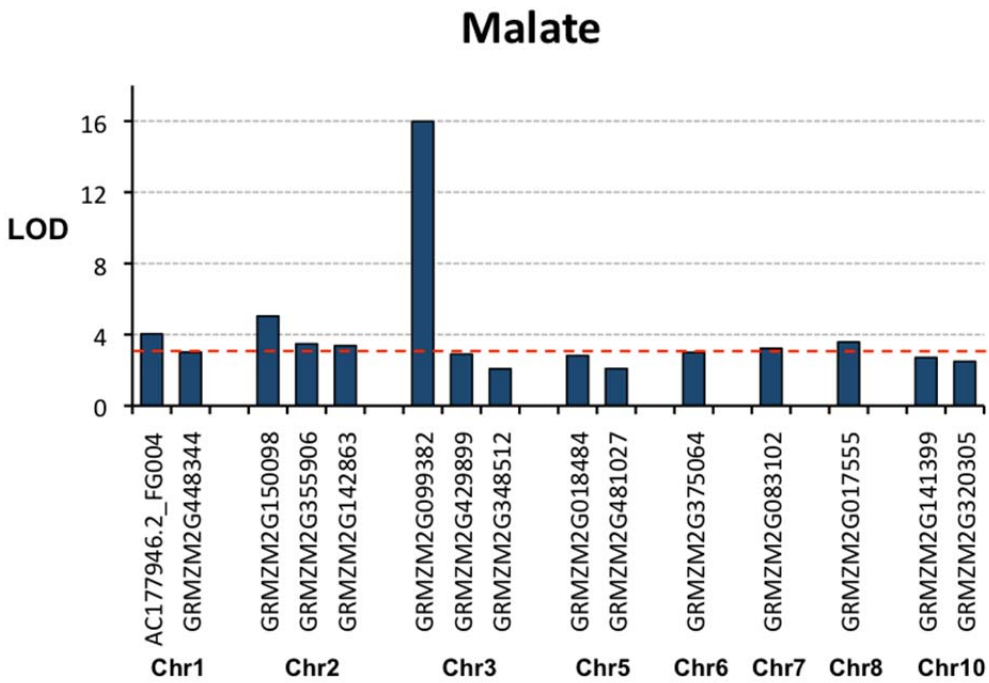

235  
236

237 I  
238

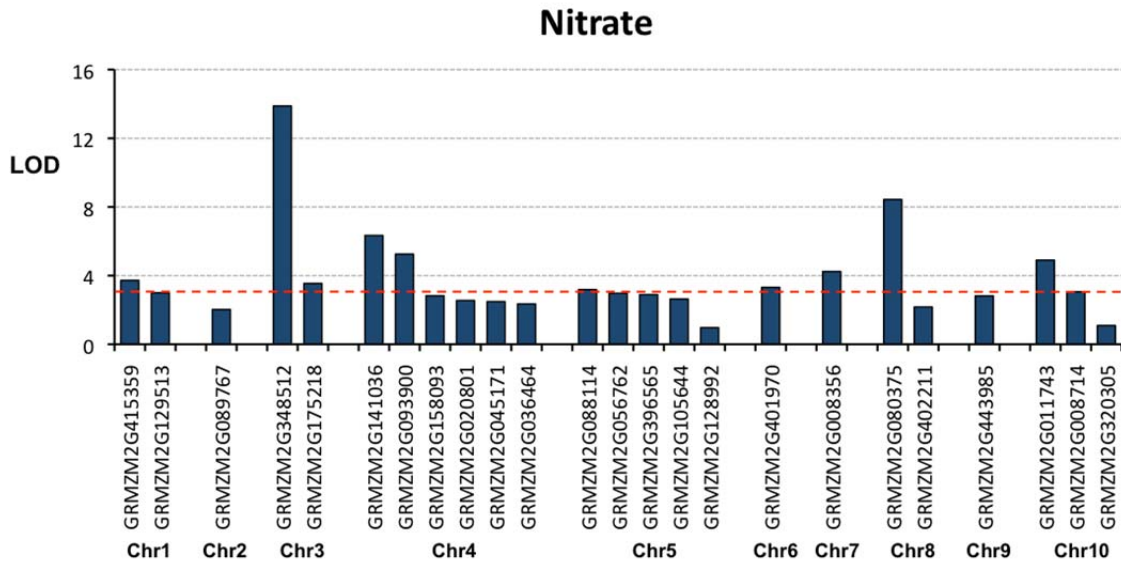

239  
240  
241  
242  
243 J  
244

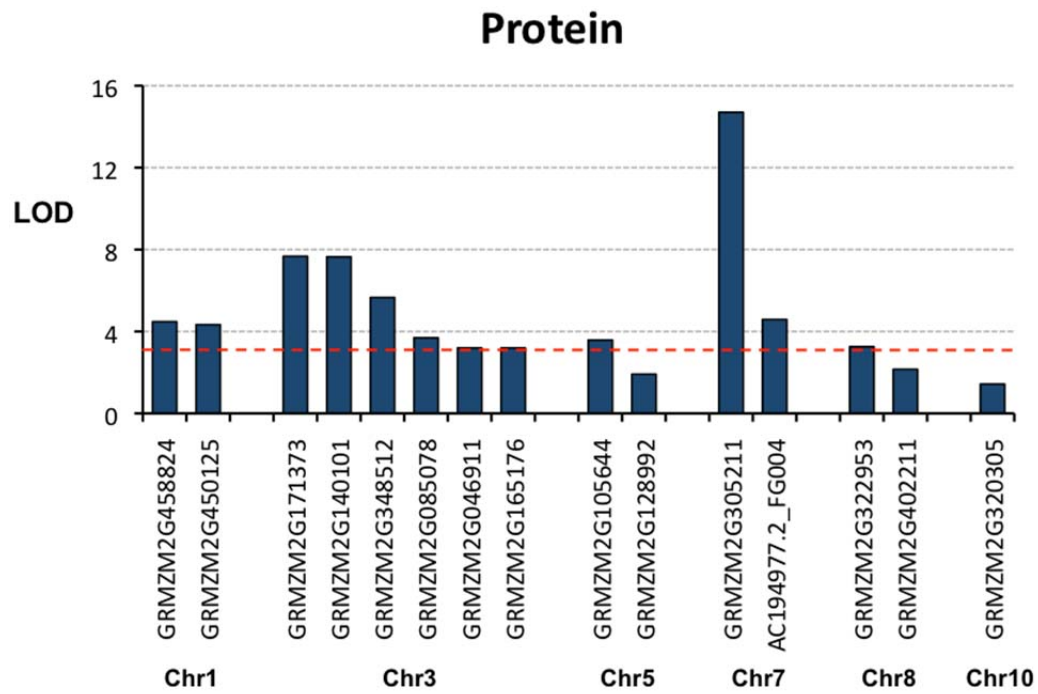

245  
246  
247  
248

249 K  
250

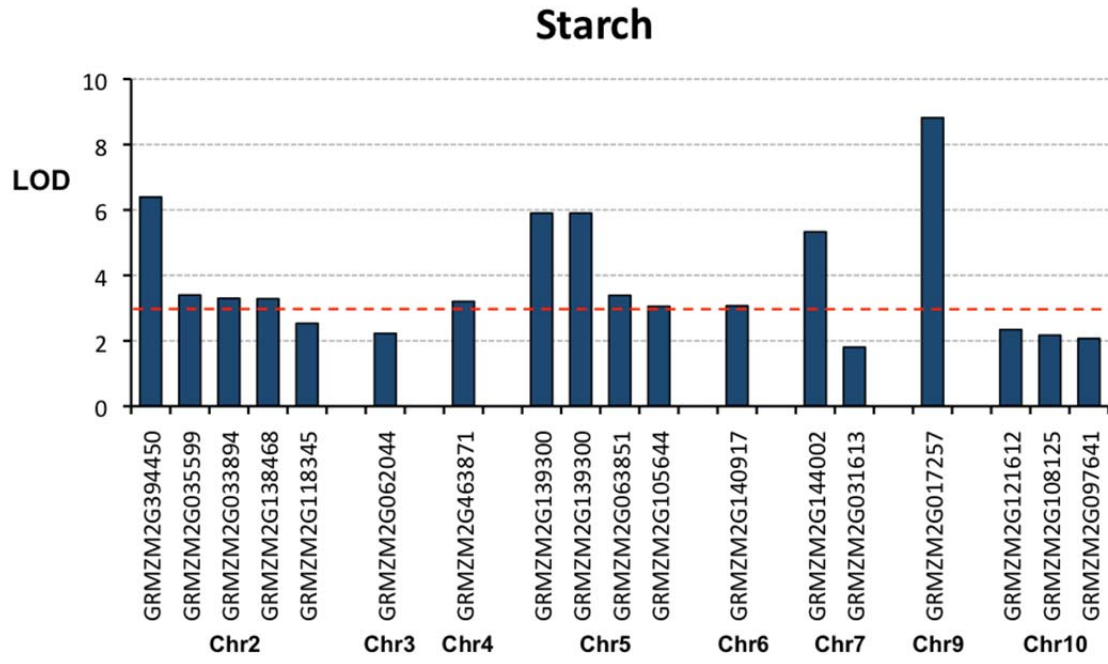

251  
252  
253  
254 L  
255

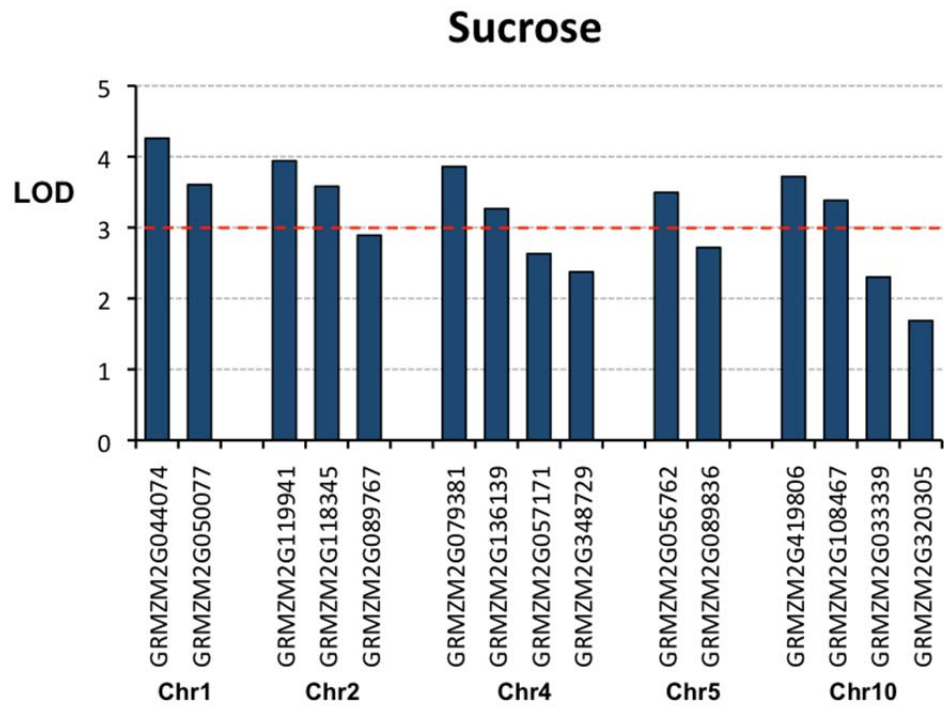

256  
257

258 **Figure S10.** The overrepresentation of metabolite GWAS in maize priori candidates. The  
259 annotations of maize priori candidates shown in this figure can be found in Table S6 and the red  
260 dashed line indicates the significance level of LOD = 3. **(A)** Total amino acids. **(B)** Chlorophyll  
261 A. **(C)** Chlorophyll B. **(D)** Fructose. **(E)** Fumarate. **(F)** Glucose. **(G)** Glutamate. **(H)** Malate. **(I)**  
262 Nitrate. **(J)** Protein. **(K)** Starch. **(L)** Sucrose.

263

264

265

266

267

268

269

270

271

272

273

274

275

276

277  
278  
279

**A**

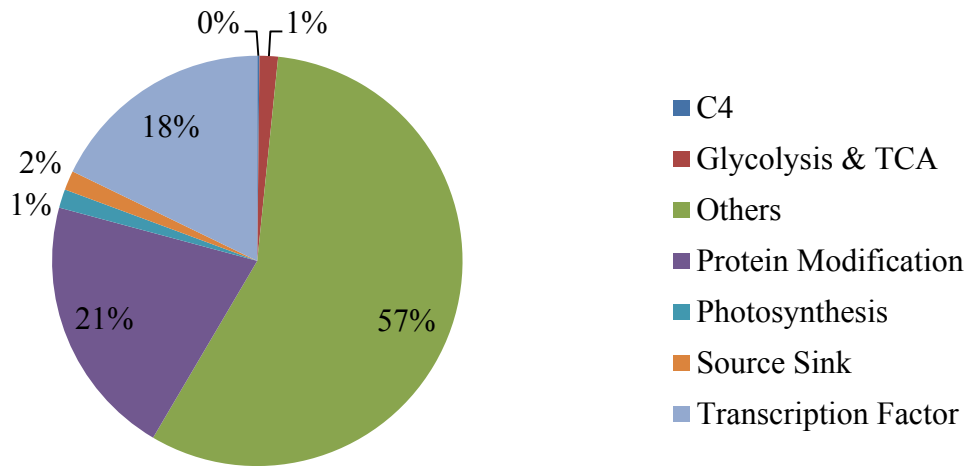

280  
281  
282  
283  
284  
285

**B**

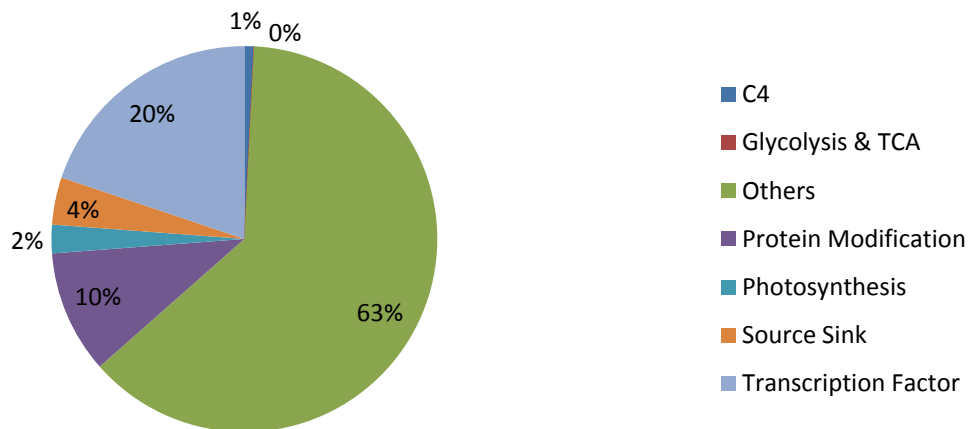

286  
287  
288  
289  
290  
291  
292  
293  
294

**Figure S11.** The distribution of different classes of genes. **(A)** Whole maize genome. **(B)** Genes which the 126 most significantly associated SNPs (RMIP $\geq$ 0.50) sit in or are adjacent to.

295  
296  
297  
298  
299  
300  
301

**A. Chrolophyll a**, Chromosome 3, 213.8 Mb

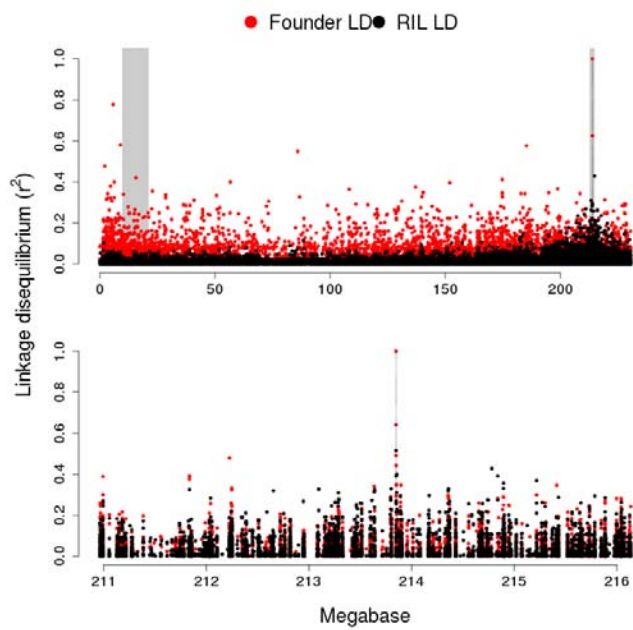

302  
303  
304  
305  
306  
307  
308

**B. Malate**, Chromosome 3, 214.3 Mb



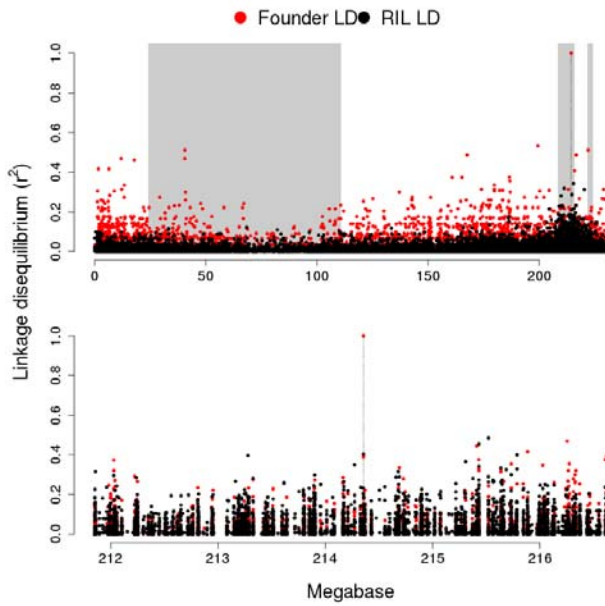

309  
310

311 **C. Starch, Chromosome 2, 22 Mb**

312

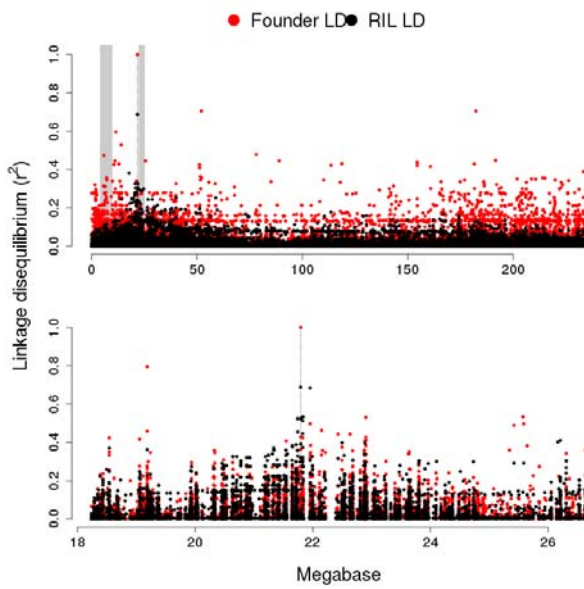

313  
314  
315  
316  
317  
318

319 **D. Starch, Chromosome 5, 168.8 Mb**

320

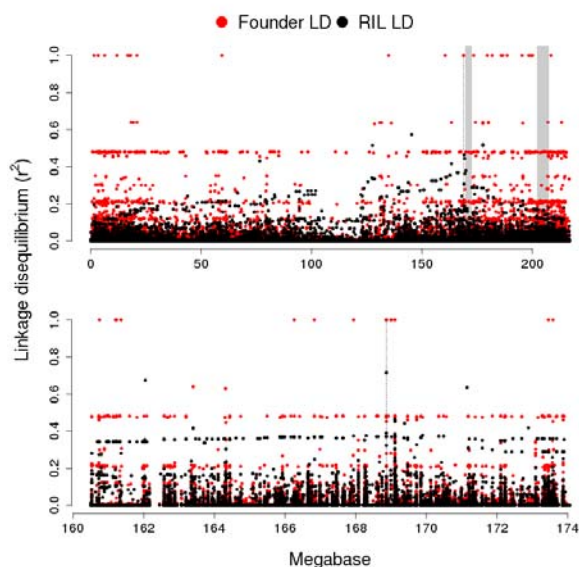

321

322

323 **Figure S12.** Linkage disequilibrium ( $r^2$ ) between a portion of SNPs identified as significantly  
324 associated with some metabolites (these are SNPs discussed in the text) and all other SNPs on  
325 the same chromosome. The position of the significant SNP to which all others are compared is  
326 indicated with a dashed vertical line (this SNP has an  $r^2$  of 1.0 with itself). Red circles indicate  
327 observed  $r^2$  values in the 25 NAM founders. Black circles indicate expected  $r^2$  values in the  
328 NAM RILs. Shaded vertical bars represent all QTL support intervals on a chromosome. Top  
329 panels display LD across an entire chromosome. Bottom panels focus on LD across an entire  
330 QTL support interval (if the significant SNP is inside of a QTL support interval) or a length of  
331 chromosome representing 5 cM of genetic distance to either side of the significant SNP (if the  
332 SNP is outside of a QTL support interval).

333

334

335

336

337

338

339

340

341

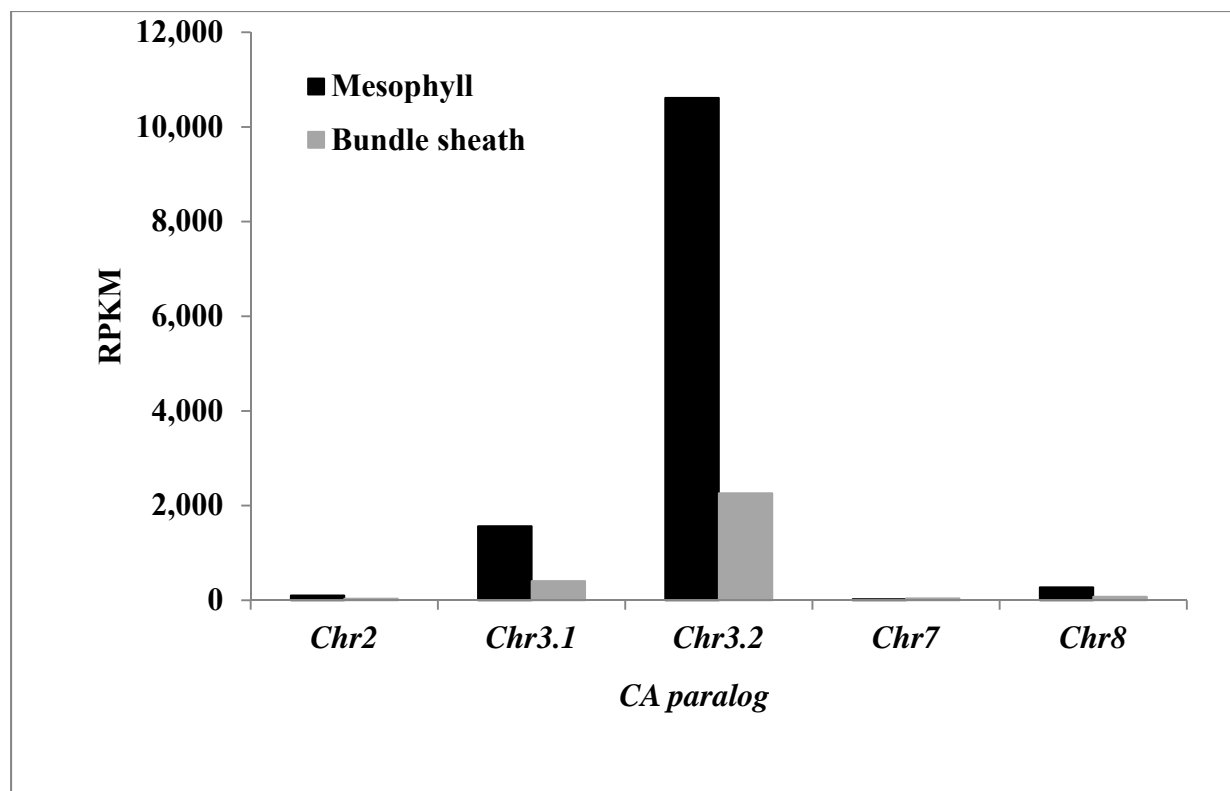

342  
 343  
 344  
 345  
 346  
 347  
 348  
 349  
 350  
 351  
 352  
 353  
 354  
 355  
 356  
 357  
 358  
 359  
 360  
 361  
 362  
 363

**Figure S13.** *carbonic anhydrase (CA)* expression in B73 at 3-leaf stage (35). RPKM: Reads per kilobase per million mapped reads (21).

**Table S1.** Whole field repeatability, NAM founder line broad-sense heritability, and number of QTL identified by joint linkage mapping.

| Trait     | Whole-field repeatability | NAM founder line broad-sense heritability | Number of QTL | R <sup>2</sup> for model |
|-----------|---------------------------|-------------------------------------------|---------------|--------------------------|
| Sucrose   | 0.49                      | 0.42                                      | 5             | 0.54                     |
| Glucose   | 0.45                      | 0.28                                      | 13            | 0.41                     |
| Fructose  | 0.44                      | 0.32                                      | 7             | 0.37                     |
| Starch    | 0.53                      | 0.40                                      | 14            | 0.55                     |
| Glutamate | 0.58                      | 0.45                                      | 7             | 0.33                     |
| Protein   | 0.34                      | 0.26                                      | 7             | 0.34                     |
| Chla      | 0.51                      | 0.49                                      | 7             | 0.41                     |
| Chlb      | 0.50                      | 0.14                                      | 9             | 0.38                     |
| Fumarate  | 0.71                      | 0.36                                      | 15            | 0.32                     |
| Malate    | 0.58                      | 0.68                                      | 9             | 0.44                     |
| AA        | 0.55                      | 0.35                                      | 18            | 0.44                     |
| Nitrate   | 0.15                      | 0.22                                      | 7             | 0.48                     |
| Prin1     | -                         | -                                         | 8             | 0.24                     |
| Prin2     | -                         | -                                         | 14            | 0.47                     |

Chla, chlorophyll a; Chlb, chlorophyll b; AA, total amino acids; Prin1: first principal component; Prin2: second principal component 2.

365

366

367

368

369

370

371

**Table S8.** Pearson correlations between flowering time and metabolites

| <b>Trait</b> | <b>Correlation Coefficient</b> | <b><i>p</i>-value</b>  |
|--------------|--------------------------------|------------------------|
| Sucr         | -0.56                          | 0                      |
| Chla         | -0.43                          | 5 x 10 <sup>-209</sup> |
| Nitr         | -0.43                          | 1 x 10 <sup>-201</sup> |
| Mala         | -0.37                          | 1 x 10 <sup>-150</sup> |
| Star         | -0.37                          | 2 x 10 <sup>-149</sup> |
| Glut         | -0.36                          | 7 x 10 <sup>-140</sup> |
| Fuma         | -0.36                          | 3 x 10 <sup>-135</sup> |
| Fruc         | -0.34                          | 1 x 10 <sup>-124</sup> |
| Prot         | -0.21                          | 5 x 10 <sup>-47</sup>  |
| AA           | 0.11                           | 1 x 10 <sup>-13</sup>  |
| Chlb         | -0.07                          | 9 x 10 <sup>-07</sup>  |
| Gluc         | -0.06                          | 1 x 10 <sup>-04</sup>  |

Sucr, sucrose; Chla, chlorophyll a; Nitr, nitrate; Mala, malate; Star, starch; Glut, glutamate; Fuma, fumarate; Fruc, fructose; Prot, protein; AA, total amino acids; Chlb, chlorophyll b; Gluc, glucose

372

373

374

375

## Parsed Citations

**Arnon DI (1949) Copper Enzymes in Isolated Chloroplasts - Polyphenoloxidase in Beta-Vulgaris. Plant Physiol 24: 1-15**

Pubmed: [Author and Title](#)

CrossRef: [Author and Title](#)

Google Scholar: [Author Only](#) [Title Only](#) [Author and Title](#)

**Bantan-Polak T, Kassai M, Grant KB (2001) A comparison of fluorescamine and naphthalene-2,3-dicarboxaldehyde fluorogenic reagents for microplate-based detection of amino acids. Anal Biochem 297: 128-136**

Pubmed: [Author and Title](#)

CrossRef: [Author and Title](#)

Google Scholar: [Author Only](#) [Title Only](#) [Author and Title](#)

**Bradford MM (1976) Rapid and Sensitive Method for Quantitation of Microgram Quantities of Protein Utilizing Principle of Protein-Dye Binding. Anal Biochem 72: 248-254**

Pubmed: [Author and Title](#)

CrossRef: [Author and Title](#)

Google Scholar: [Author Only](#) [Title Only](#) [Author and Title](#)

**Brautigam A, Weber APM (2011) Do Metabolite Transport Processes Limit Photosynthesis? Plant Physiol 155: 43-48**

Pubmed: [Author and Title](#)

CrossRef: [Author and Title](#)

Google Scholar: [Author Only](#) [Title Only](#) [Author and Title](#)

**Buckler ES, Holland JB, Bradbury PJ, Acharya CB, Brown PJ, Browne C, Ersoz E, Flint-Garcia S, Garcia A, Glaubitz JC, et al. (2009) The Genetic Architecture of Maize Flowering Time. Science (80- ) 325: 714-718**

Pubmed: [Author and Title](#)

CrossRef: [Author and Title](#)

Google Scholar: [Author Only](#) [Title Only](#) [Author and Title](#)

**Chia JM, Song C, Bradbury PJ, Costich D, de Leon N, Doebley J, Elshire RJ, Gaut B, Geller L, Glaubitz JC et al. (2012) Maize HapMap2 identifies extant variation from a genome in flux. Nat Genet 44(7): 803-807.**

Pubmed: [Author and Title](#)

CrossRef: [Author and Title](#)

Google Scholar: [Author Only](#) [Title Only](#) [Author and Title](#)

**Coruzzi G, Bush DR (2001) Nitrogen and carbon nutrient and metabolite signaling in plants. Plant Physiol 125: 61-64**

Pubmed: [Author and Title](#)

CrossRef: [Author and Title](#)

Google Scholar: [Author Only](#) [Title Only](#) [Author and Title](#)

**Coruzzi GM, Gutierrez RA, Lejay L V, Dean A, Chiaromonte F, Shasha DE (2007) Qualitative network models and genome-wide expression data define carbon/nitrogen-responsive molecular machines in Arabidopsis. Genome Biol. doi: 10.1186/gb-2007-8-1-r7**

Pubmed: [Author and Title](#)

CrossRef: [Author and Title](#)

Google Scholar: [Author Only](#) [Title Only](#) [Author and Title](#)

**Cousins AB, Badger MR (2008) C4 photosynthetic isotope exchange in NAD-ME- and NADP-ME-type grasses. J Exp Bot 59: 1695-1703.**

Pubmed: [Author and Title](#)

CrossRef: [Author and Title](#)

Google Scholar: [Author Only](#) [Title Only](#) [Author and Title](#)

**Dickinson CD, Altabella T, Chrispeels MJ (1991) Slow-Growth Phenotype of Transgenic Tomato Expressing Apoplastic Invertase. Plant Physiol 95: 420-425**

Pubmed: [Author and Title](#)

CrossRef: [Author and Title](#)

Google Scholar: [Author Only](#) [Title Only](#) [Author and Title](#)

**Geigenberger P, Lerchl J, Stitt M, Sonnewald U (1996) Phloem-specific expression of pyrophosphatase inhibits long-distance transport of carbohydrates and amino acids in tobacco plants. Plant Cell Environ 19: 43-55**

Pubmed: [Author and Title](#)

CrossRef: [Author and Title](#)

Google Scholar: [Author Only](#) [Title Only](#) [Author and Title](#)

**Gibon Y, Blaesing OE, Hannemann J, Carillo P, Hohne M, Hendriks JHM, Palacios N, Cross J, Selbig J, Stitt M (2004) A robot-based platform to measure multiple enzyme activities in Arabidopsis using a set of cycling assays: Comparison of changes of enzyme activities and transcript levels during diurnal cycles and in prolonged darkness. Plant Cell 16: 3304-3325**

Pubmed: [Author and Title](#)

CrossRef: [Author and Title](#)

Google Scholar: [Author Only](#) [Title Only](#) [Author and Title](#)

**Gilmour AR, Gogel BJ, Cullis BR, Thompson R (2005) ASReml User Guide Release 2.0. VSN International Ltd, Hemel Hempstead, HP1 1ES, UK**

Pubmed: [Author and Title](#)

CrossRef: [Author and Title](#)

Google Scholar: [Author Only](#) [Title Only](#) [Author and Title](#)

**Gore MA, Chia JM, Elshire RJ, Sun Q, Ersoz ES, Hurwitz BL, Peiffer JA, McMullen MD, Grills GS, Ross-Ibarra J, et al (2009) A First-Generation Haplotype Map of Maize. Science (80- ) 326: 1115-1117**

Pubmed: [Author and Title](#)  
CrossRef: [Author and Title](#)  
Google Scholar: [Author Only](#) [Title Only](#) [Author and Title](#)

**Gowik U, Westhoff P (2011) The Path from C-3 to C-4 Photosynthesis. Plant Physiol 155: 56-63**

Pubmed: [Author and Title](#)  
CrossRef: [Author and Title](#)  
Google Scholar: [Author Only](#) [Title Only](#) [Author and Title](#)

**Hatch MD, Mau SL (1973) Activity, Location, and Role of Aspartate Aminotransferase and Alanine Aminotransferase Isoenzymes in Leaves with C4 Pathway Photosynthesis. Arch Biochem Biophys 156: 195-206**

Pubmed: [Author and Title](#)  
CrossRef: [Author and Title](#)  
Google Scholar: [Author Only](#) [Title Only](#) [Author and Title](#)

**Hendriks JHM, Kolbe A, Gibon Y, Stitt M, Geigenberger P (2003) ADP-glucose pyrophosphorylase is activated by posttranslational redox-modification in response to light and to sugars in leaves of Arabidopsis and other plant species. Plant Physiol 133: 838-849**

Pubmed: [Author and Title](#)  
CrossRef: [Author and Title](#)  
Google Scholar: [Author Only](#) [Title Only](#) [Author and Title](#)

**Hirel B, Bertin P, Quillere I, Bourdoncle W, Attagnant C, Delly C, Gouy A, Cadiou S, Retailiau C, Falque M, et al (2001) Towards a better understanding of the genetic and physiological basis for nitrogen use efficiency in maize. Plant Physiol 125: 1258-1270**

Pubmed: [Author and Title](#)  
CrossRef: [Author and Title](#)  
Google Scholar: [Author Only](#) [Title Only](#) [Author and Title](#)

**Holland JB, Nyquist WE, Cervantes-Martínez CT (2003) Estimating and Interpreting heritability for plant breeding: an update. Plant Breed Rev 22: 104**

Pubmed: [Author and Title](#)  
CrossRef: [Author and Title](#)  
Google Scholar: [Author Only](#) [Title Only](#) [Author and Title](#)

**Holm S (1979) A Simple Sequentially Rejective Multiple Test Procedure. Scand J Stat 6: 65-70**

Pubmed: [Author and Title](#)  
CrossRef: [Author and Title](#)  
Google Scholar: [Author Only](#) [Title Only](#) [Author and Title](#)

**Hu HH, Boisson-Dernier A, Israelsson-Nordstrom M, Bohmer M, Xue SW, Ries A, Godoski J, Kuhn JM, Schroeder JI (2010) Carbonic anhydrases are upstream regulators of CO<sub>2</sub>-controlled stomatal movements in guard cells. Nat Cell Biol 12: 87-U234**

Pubmed: [Author and Title](#)  
CrossRef: [Author and Title](#)  
Google Scholar: [Author Only](#) [Title Only](#) [Author and Title](#)

**Jelitto T, Sonnewald U, Willmitzer L, Hajirezeai M, Stitt M (1992) Inorganic Pyrophosphate Content and Metabolites in Potato and Tobacco Plants Expressing Escherichia-Coli Pyrophosphatase in Their Cytosol. Planta 188: 238-244**

Pubmed: [Author and Title](#)  
CrossRef: [Author and Title](#)  
Google Scholar: [Author Only](#) [Title Only](#) [Author and Title](#)

**Keurentjes JJB, Sulpice R, Gibon Y, Steinhauser MC, Fu JY, Koornneef M, Stitt M, Vreugdenhil D (2008) Integrative analyses of genetic variation in enzyme activities of primary carbohydrate metabolism reveal distinct modes of regulation in Arabidopsis thaliana. Genome Biol 9: -**

Pubmed: [Author and Title](#)  
CrossRef: [Author and Title](#)  
Google Scholar: [Author Only](#) [Title Only](#) [Author and Title](#)

**Kingston-Smith AH, Galtier N, Pollock CJ, Foyer CH (1998) Soluble acid invertase activity in leaves is independent of species differences in leaf carbohydrates, diurnal sugar profiles and paths of phloem loading. New Phytol 139: 283-292**

Pubmed: [Author and Title](#)  
CrossRef: [Author and Title](#)  
Google Scholar: [Author Only](#) [Title Only](#) [Author and Title](#)

**Kump KL, Bradbury PJ, Wissner RJ, Buckler ES, Belcher AR, et al. (2011) Genome-wide association study of quantitative resistance to southern leaf blight in the maize nested association mapping population. Nat Genet 43: 163-168.**

Pubmed: [Author and Title](#)  
CrossRef: [Author and Title](#)  
Google Scholar: [Author Only](#) [Title Only](#) [Author and Title](#)

**Laurie CC, Chasalow SD, LeDeaux JR, McCarroll R, Bush D, Hauge B, Lai C, Clark D, Rocheford TR, Dudley JW (2004) The genetic architecture of response to long-term artificial selection for oil concentration in the maize kernel. Genetics 168: 2141-2155**

Pubmed: [Author and Title](#)  
CrossRef: [Author and Title](#)  
Google Scholar: [Author Only](#) [Title Only](#) [Author and Title](#)

**Li PH, Ainsworth EA, Leakey ADB, Ulanov A, Lozovaya V, Ort DR, Bohnert HJ (2008) Arabidopsis transcript and metabolite profiles: ecotype-specific responses to open-air elevated [CO<sub>2</sub>]. Plant Cell Environ 31: 1673-1687**

Pubmed: [Author and Title](#)  
CrossRef: [Author and Title](#)  
Google Scholar: [Author Only](#) [Title Only](#) [Author and Title](#)

Li PH, Ponnala L, Gandotra N, Wang L, Si YQ, Tausta SL, Kebrom TH, Provart N, Patel R, Myers CR, et al (2010) The developmental dynamics of the maize leaf transcriptome. *Nat Genet* 42: 1060-U51

Pubmed: [Author and Title](#)

CrossRef: [Author and Title](#)

Google Scholar: [Author Only](#) [Title Only](#) [Author and Title](#)

Limami AM, Rouillon C, Glevarec G, Gallais A, Hirel B (2002) Genetic and physiological analysis of germination efficiency in maize in relation to nitrogen metabolism reveals the importance of cytosolic glutamine synthetase. *Plant Physiol* 130: 1860-1870

Pubmed: [Author and Title](#)

CrossRef: [Author and Title](#)

Google Scholar: [Author Only](#) [Title Only](#) [Author and Title](#)

Lisec J, Meyer RC, Steinfath M, Redestig H, Becher M, Witucka-Wall H, Fiehn O, Torjek O, Selbig J, Altmann T, et al (2008) Identification of metabolic and biomass QTL in *Arabidopsis thaliana* in a parallel analysis of RIL and IL populations. *Plant J* 53: 960-972

Pubmed: [Author and Title](#)

CrossRef: [Author and Title](#)

Google Scholar: [Author Only](#) [Title Only](#) [Author and Title](#)

Ludwig M, von Caemmerer S, Price GD, Badger MR, Furbank RT (1998) Expression of tobacco carbonic anhydrase in the C-4 dicot *Flaveria bidentis* leads to increased leakiness of the bundle sheath and a defective CO<sub>2</sub>-concentrating mechanism. *Plant Physiol* 117: 1071-1081

Pubmed: [Author and Title](#)

CrossRef: [Author and Title](#)

Google Scholar: [Author Only](#) [Title Only](#) [Author and Title](#)

McMullen MD, Kresovich S, Villeda HS, Bradbury P, Li HH, Sun Q, Flint-Garcia S, Thornsberry J, Acharya C, Bottoms C, et al. (2009) Genetic Properties of the Maize Nested Association Mapping Population. *Science* (80- ) 325: 737-740

Pubmed: [Author and Title](#)

CrossRef: [Author and Title](#)

Google Scholar: [Author Only](#) [Title Only](#) [Author and Title](#)

Mitchell-Olds T, Pedersen D (1998) The molecular basis of quantitative genetic variation in central and secondary metabolism in *Arabidopsis*. *Genetics* 149: 739-747

Pubmed: [Author and Title](#)

CrossRef: [Author and Title](#)

Google Scholar: [Author Only](#) [Title Only](#) [Author and Title](#)

Nunes-Nesi A, Araujo WL, Fernie AR (2011) Targeting Mitochondrial Metabolism and Machinery as a Means to Enhance Photosynthesis. *Plant Physiol* 155: 101-107

Pubmed: [Author and Title](#)

CrossRef: [Author and Title](#)

Google Scholar: [Author Only](#) [Title Only](#) [Author and Title](#)

Nunes-Nesi A, Carrari F, Gibon Y, Sulpice R, Lytovchenko A, Fisahn J, Graham J, Ratcliffe RG, Sweetlove LJ, Fernie AR (2007) Deficiency of mitochondrial fumarase activity in tomato plants impairs photosynthesis via an effect on stomatal function. *Plant J* 50: 1093-1106

Pubmed: [Author and Title](#)

CrossRef: [Author and Title](#)

Google Scholar: [Author Only](#) [Title Only](#) [Author and Title](#)

Peiffer JA, Flint-Garcia SA, De Leon N, McMullen MD, Kaeppler SM, et al. (2013) The genetic architecture of maize stalk strength. *PLoS One* 8: e67066.

Pubmed: [Author and Title](#)

CrossRef: [Author and Title](#)

Google Scholar: [Author Only](#) [Title Only](#) [Author and Title](#)

Peiffer JA, Romay MC, Gore MA, Flint-Garcia SA, Zhang Z, et al. (2014) The genetic architecture of maize height. *Genetics* 196: 1337-1356

Pubmed: [Author and Title](#)

CrossRef: [Author and Title](#)

Google Scholar: [Author Only](#) [Title Only](#) [Author and Title](#)

Piques M, Schulze WX, Hohne M, Usadel B, Gibon Y, Rohwer J, Stitt M (2009) Ribosome and transcript copy numbers, polysome occupancy and enzyme dynamics in *Arabidopsis*. *Mol Syst Biol* 5: -

Pubmed: [Author and Title](#)

CrossRef: [Author and Title](#)

Google Scholar: [Author Only](#) [Title Only](#) [Author and Title](#)

Poland JA, Bradbury PJ, Buckler ES, Nelson RJ (2011) Genome-wide nested association mapping of quantitative resistance to northern leaf blight in maize. *Proc Natl Acad Sci U S A* 108: 6893-6898

Pubmed: [Author and Title](#)

CrossRef: [Author and Title](#)

Google Scholar: [Author Only](#) [Title Only](#) [Author and Title](#)

Prioul JL, Kim JY, Mahe A, Brangeon J (2000) A maize vacuolar invertase, IVR2, is induced by water stress. Organ/tissue specificity and diurnal modulation of expression. *Plant Physiol* 124: 71-84

Pubmed: [Author and Title](#)

CrossRef: [Author and Title](#)

Google Scholar: [Author Only](#) [Title Only](#) [Author and Title](#)



**Sage RF (2004) The Evolution of C4 photosynthesis. New Phytol 161: 341-370**

Pubmed: [Author and Title](#)

CrossRef: [Author and Title](#)

Google Scholar: [Author Only](#) [Title Only](#) [Author and Title](#)

**Sage RF, Zhu X-G (2011) Exploiting the engine of C4 photosynthesis. J Exp Bot 62(9):3001-3010**

Pubmed: [Author and Title](#)

CrossRef: [Author and Title](#)

Google Scholar: [Author Only](#) [Title Only](#) [Author and Title](#)

**Schauer N, Semel Y, Roessner U, Gur A, Balbo I, Carrari F, Pleban T, Perez-Melis A, Bruedigam C, Kopka J, et al. (2006) Comprehensive metabolic profiling and phenotyping of interspecific introgression lines for tomato improvement. Nat Biotechnol 24: 447-454**

Pubmed: [Author and Title](#)

CrossRef: [Author and Title](#)

Google Scholar: [Author Only](#) [Title Only](#) [Author and Title](#)

**Scheibe R (2004) Malate valves to balance cellular energy supply. Physiol Plant 120: 21-16**

Pubmed: [Author and Title](#)

CrossRef: [Author and Title](#)

Google Scholar: [Author Only](#) [Title Only](#) [Author and Title](#)

**Scheible WR, Gonzalez-Fontes A, Lauerer M, Muller-Rober B, Caboche M, Stitt M (1997) Nitrate Acts as a Signal to Induce Organic Acid Metabolism and Repress Starch Metabolism in Tobacco. Plant Cell 9(5) : 783-798**

Pubmed: [Author and Title](#)

CrossRef: [Author and Title](#)

Google Scholar: [Author Only](#) [Title Only](#) [Author and Title](#)

**Schnable PS, Ware D, Fulton RS, Stein JC, Wei FS, Pasternak S, Liang CZ, Zhang JW, Fulton L, Graves TA, et al. (2009) The B73 Maize Genome: Complexity, Diversity, and Dynamics. Science (80- ) 326: 1112-1115**

Pubmed: [Author and Title](#)

CrossRef: [Author and Title](#)

Google Scholar: [Author Only](#) [Title Only](#) [Author and Title](#)

**Smith CW, Betrán J, Runge ECA (2004) Corn : origin, history, technology, and production. Wiley Ser Crop Sci xi, 949 p.**

Pubmed: [Author and Title](#)

CrossRef: [Author and Title](#)

Google Scholar: [Author Only](#) [Title Only](#) [Author and Title](#)

**Sulpice R, Pyl ET, Ishihara H, Trenkamp S, Steinfath M, Witucka-Wall H, Gibon Y, Usadel B, Poree F, Piques MC, et al (2009) Starch as a major integrator in the regulation of plant growth. Proc Natl Acad Sci U S A 106: 10348-10353**

Pubmed: [Author and Title](#)

CrossRef: [Author and Title](#)

Google Scholar: [Author Only](#) [Title Only](#) [Author and Title](#)

**Takahashi H, Takahara K, Hashida S, Hirabayashi T, Fujimori T, Kawai-Yamada M, Yamaya T, Yanagisawa S, Uchimiyama H (2009) Pleiotropic Modulation of Carbon and Nitrogen Metabolism in Arabidopsis Plants Overexpressing the NAD kinase2 Gene. Plant Physiol 151: 100-113**

Pubmed: [Author and Title](#)

CrossRef: [Author and Title](#)

Google Scholar: [Author Only](#) [Title Only](#) [Author and Title](#)

**Tang GQ, Luscher M, Sturm A (1999) Antisense repression of vacuolar and cell wall invertase in transgenic carrot alters early plant development and sucrose partitioning. Plant Cell 11: 177-189**

Pubmed: [Author and Title](#)

CrossRef: [Author and Title](#)

Google Scholar: [Author Only](#) [Title Only](#) [Author and Title](#)

**Thimm O, Blasing O, Gibon Y, Nagel A, Meyer S, Kruger P, Selbig J, Muller LA, Rhee SY, Stitt M (2004) MAPMAN: a user-driven tool to display genomics data sets onto diagrams of metabolic pathways and other biological processes. Plant J 37: 914-939**

Pubmed: [Author and Title](#)

CrossRef: [Author and Title](#)

Google Scholar: [Author Only](#) [Title Only](#) [Author and Title](#)

**Tian F, Bradbury PJ, Brown PJ, Hung H, Sun Q, et al. (2011) Genome-wide association study of leaf architecture in the maize nested association mapping population. Nat Genet 43: 159-162.**

Pubmed: [Author and Title](#)

CrossRef: [Author and Title](#)

Google Scholar: [Author Only](#) [Title Only](#) [Author and Title](#)

**Tschoep H, Gibon Y, Carillo P, Armengaud P, Szecewka M, Nunes-Nesi A, Fernie AR, Koehl K, Stitt M (2009) Adjustment of growth and central metabolism to a mild but sustained nitrogen-limitation in Arabidopsis. Plant Cell Environ 32: 300-318**

Pubmed: [Author and Title](#)

CrossRef: [Author and Title](#)

Google Scholar: [Author Only](#) [Title Only](#) [Author and Title](#)

**Valdar W, Holmes CC, Mott R, Flint J (2009) Mapping in Structured Populations by Resample Model Averaging. Genetics 182: 1263-1277**

Pubmed: [Author and Title](#)

CrossRef: [Author and Title](#)

Google Scholar: [Author Only](#) [Title Only](#) [Author and Title](#)

**Valdar W, Solberg LC, Gauguier D, Burnett S, Klenerman P, O Cookson W, Taylor MS, Rawlins JNP, Mott R, Flint J (2006) Genome-wide genetic association of complex traits in heterogeneous stock mice. Nat Genet 38: 879-887**

Pubmed: [Author and Title](#)

CrossRef: [Author and Title](#)

Google Scholar: [Author Only](#) [Title Only](#) [Author and Title](#)

**Wallace JG, Bradbury PJ, Zhang N, Gibon Y, Stitt M, Bucker ES (2014) Association Mapping across Numerous Traits Reveals Patterns of Functional Variation in Maize. PLoS Genet 10(12): e1004845**

Pubmed: [Author and Title](#)

CrossRef: [Author and Title](#)

Google Scholar: [Author Only](#) [Title Only](#) [Author and Title](#)

**Wang JL, Turgeon R, Carr JP, Berry JO (1993) Carbon Sink-to-Source Transition Is Coordinated with Establishment of Cell-Specific Gene-Expression in a C4 Plant. Plant Cell 5: 289-296**

Pubmed: [Author and Title](#)

CrossRef: [Author and Title](#)

Google Scholar: [Author Only](#) [Title Only](#) [Author and Title](#)

**Weiner H, Burnell JN, Woodrow IE, Heldt HW, Hatch MD (1988) Metabolite Diffusion into Bundle Sheath-Cells from C-4 Plants - Relation to C-4 Photosynthesis and Plasmodesmatal Function. Plant Physiol 88: 815-822**

Pubmed: [Author and Title](#)

CrossRef: [Author and Title](#)

Google Scholar: [Author Only](#) [Title Only](#) [Author and Title](#)

**Youens-Clark K, Buckler E, Casstevens T, Chen C, DeClerck G, Derwent P, Dharmawardhana P, Jaiswal P, Kersey P, Karthikeyan AS, et al (2011) Gramene database in 2010: updates and extensions. Nucleic Acids Res 39: D1085-D1094**

Pubmed: [Author and Title](#)

CrossRef: [Author and Title](#)

Google Scholar: [Author Only](#) [Title Only](#) [Author and Title](#)

**Zhang NY, Gibon Y, Gur A, Chen C, Lepak N, Hohne M, Zhang ZW, Kroon D, Tschoep H, Stitt M, et al (2010a) Fine Quantitative Trait Loci Mapping of Carbon and Nitrogen Metabolism Enzyme Activities and Seedling Biomass in the Maize IBM Mapping Population. Plant Physiol 154: 1753-1765**

Pubmed: [Author and Title](#)

CrossRef: [Author and Title](#)

Google Scholar: [Author Only](#) [Title Only](#) [Author and Title](#)

**Zhang NY, Gur A, Gibon Y, Sulpice R, Flint-Garcia S, McMullen MD, Stitt M, Buckler ES (2010b) Genetic Analysis of Central Carbon Metabolism Unveils an Amino Acid Substitution That Alters Maize NAD-Dependent Isocitrate Dehydrogenase Activity. PLoS One 5:**

Pubmed: [Author and Title](#)

CrossRef: [Author and Title](#)

Google Scholar: [Author Only](#) [Title Only](#) [Author and Title](#)

**Zhang ZY, Ober JA, Kliebenstein DJ (2006) The gene controlling the quantitative trait locus EPITHIOSPECIFIER MODIFIER1 alters glucosinolate hydrolysis and insect resistance in Arabidopsis. Plant Cell 18: 1524-1536**

Pubmed: [Author and Title](#)

CrossRef: [Author and Title](#)

Google Scholar: [Author Only](#) [Title Only](#) [Author and Title](#)

**Zhu X-G, Long SP, Ort DR (2010) Improving Photosynthetic Efficiency for Greater Yield. Ann Rev Plant Biol 61:235-261**

Pubmed: [Author and Title](#)

CrossRef: [Author and Title](#)

Google Scholar: [Author Only](#) [Title Only](#) [Author and Title](#)
