# Supplementary material
Source: PubMed Central journal article supplement (PMC4453775)
Supplement: supp_pp.15.00025_00025supptbl2.pdf [file supp_pp.15.00025_00025supptbl2.pdf]

**Table S2.** A subset of the SNP loci found to be associated with metabolites by nested associ

| SNP No. | Trait     | Chr | SNP Physical Position<br>(AGPv1) | RMIP (%) | Gene                                   |
|---------|-----------|-----|----------------------------------|----------|----------------------------------------|
| 173     | Chla      | 3   | 213,848,077                      | 48       | carbonic anhydrase                     |
| 174     | Chla      | 3   | 213,848,298                      | 10       | carbonic anhydrase                     |
| 175     | Chla      | 3   | 213,894,582                      | 24       | carbonic anhydrase                     |
| 208     | Chla      | 9   | 23,215,157                       | 16       | starch synthase                        |
| 360     | Fructose  | 5   | 204,526,436                      | 41       | endoglucanase 1 (Cellulase)            |
| 397     | Fumarate  | 1   | 195,285,519                      | 22       | pyruvate dehydrogenase E1              |
| 481     | Glucose   | 2   | 175895506                        | 12       | endoglucanase 1 (Cellulase)            |
| 537     | Glucose   | 5   | 212,261,524                      | 29       | trehalose-6-phosphate<br>synthase      |
| 549     | Glucose   | 7   | 27,327,128                       | 15       | nitrate transporter                    |
| 626     | Glutamate | 3   | 213,890,769                      | 6        | carbonic anhydrase                     |
| 710     | Malate    | 3   | 213,856,232                      | 29       | carbonic anhydrase                     |
| 711     | Malate    | 3   | 214,330,739                      | 23       | malate transporter                     |
| 771     | Nitrate   | 1   | 202,621,762                      | 5        | malate dehydrogenase<br>(NADP+)        |
| 794     | Nitrate   | 2   | 181,079,834                      | 39       | chla,b binding protein                 |
| 810     | Nitrate   | 3   | 213,848,077                      | 7        | carbonic anhydrase                     |
| 824     | Nitrate   | 4   | 166,175,217                      | 5        | glutamine synthetase                   |
| 839     | Nitrate   | 5   | 185,687,667                      | 8        | PEPC kinase                            |
| 897     | Protein   | 3   | 213,854,238                      | 11       | carbonic anhydrase                     |
| 900     | Protein   | 4   | 227,245,511                      | 44       | xyloglucan:xyloglucosyl<br>transferase |
| 902     | Protein   | 5   | 88,557,383                       | 74       | fasciclin-like arabinogalactan         |
| 928     | Protein   | 8   | 117,977,083                      | 51       | ribosomal protein                      |
| 936     | Protein   | 9   | 98,709,960                       | 8        | xylan 1,4-beta-xylosidase              |
| 968     | Starch    | 2   | 22,808,083                       | 76       | invertase                              |
| 1019    | Starch    | 5   | 168,868,583                      | 67       | invertase                              |

Chla, chlorophyll a

ation mapping

---

Gene Physical Position  
(AGPv1)

---

213,847,057-213,859,958

213,847,057-213,859,958

213,888,899-213,896,251

23,213,761-23,217,689

204,527,678-204,531,175

195,281,414-195,283,531

175,894,386- 175,895,850

212,257,755-212,261,697

27,325,702-27,328,277

213,888,899-213,896,251

213,847,057-213,859,958

214,325,927-214,328,710

202,617,705-202,621,864

181,076,994-181,079,397

213,847,057-213,859,958

166,172,187-166,175,518

185,687,505-185,688,981

213,847,057-213,859,958

227,245,034- 227,246,459

88,556,567- 88,557,537

117,979,473-117,983,191

98,708,757- 98,711,520

22,804,880-22,809,451

168,865,756-168,868,879

---
