# Supplementary material
Source: PubMed Central journal article supplement (PMC4453775)
Supplement: supp_pp.15.00025_00025supptbl3.pdf [file supp_pp.15.00025_00025supptbl3.pdf]

**Table S3.** Maize HapMap ver1 SNPs detected from genome-wide association study for 12 metabolites in the nested association mapping population and predicted genes contain

MapMan annotation (16) ([http://mapman.gabipd.org/web/guest.jsessionid=6F668C7FEAD5974C806D217A3560EDF2.ajp13\\_mapman\\_gabipd\\_org](http://mapman.gabipd.org/web/guest.jsessionid=6F668C7FEAD5974C806D217A3560EDF2.ajp13_mapman_gabipd_org)) was used to assign genes Mala, malate; Fuma, fumarate; Glut, glutamate; Chla, chlorophyll a; Chlb, chlorophyll b; Nitr, nitrate; Sucr, sucrose; Gluc, glucose; Fruc, fructose; Star, starch; AA, total amino acids

| Significant SNP Information |       |     |                           |                       |                                      |                    |                  |        |           |                                                                                                                               |
|-----------------------------|-------|-----|---------------------------|-----------------------|--------------------------------------|--------------------|------------------|--------|-----------|-------------------------------------------------------------------------------------------------------------------------------|
| SNP No.                     | Trait | Chr | Physical Position (AGPv1) | Imputed cM on NAM Map | Resample Model Inclusion Probability | Average SNP effect | Distance to Gene | Bicode | Gene ID   | Category                                                                                                                      |
| 1                           | AA    | 1   | 13935133                  | 28.26096353           |                                      | 26                 | -0.085551628     |        |           |                                                                                                                               |
| 2                           | AA    | 1   | 16780363                  | 33.28759975           |                                      | 31                 | -0.081912456     |        |           |                                                                                                                               |
| 3                           | AA    | 1   | 33393305                  | 52.652275             |                                      | 11                 | 0.097059759      |        |           |                                                                                                                               |
| 4                           | AA    | 1   | 165885858                 | 91.92724657           |                                      | 9                  | 0.091736639      |        |           |                                                                                                                               |
| 5                           | AA    | 1   | 177389147                 | 95.59351325           |                                      | 20                 | -0.098789746     |        |           |                                                                                                                               |
| 6                           | AA    | 1   | 182391497                 | 97.70267302           |                                      | 18                 | -0.094955313     | Inside | 27.3.25'  | grmzm2g110<br>135_t01<br>'RNA.regulation of transcription.MYB domain transcription factor family'                             |
| 7                           | AA    | 1   | 192608853                 | 106.1391166           |                                      | 12                 | -0.107384883     | Inside | '10.1.6'  | grmzm2g161<br>233_t01<br>'cell wall.precursor synthesis.GAE'<br>'cell wall.degradation.pectate lyases and polygalacturonases' |
| 8                           | AA    | 1   | 205585447                 | 117.8354213           |                                      | 6                  | -0.061343453     | Inside | '10.6.3'  | grmzm2g154<br>124_t01<br>polygalacturonases'                                                                                  |
| 9                           | AA    | 1   | 205728648                 | 117.9733694           |                                      | 10                 | -0.053004958     |        |           |                                                                                                                               |
| 10                          | AA    | 1   | 207120770                 | 119.3144261           |                                      | 15                 | -0.061520606     |        |           |                                                                                                                               |
| 11                          | AA    | 1   | 207135155                 | 119.3282834           |                                      | 8                  | -0.073649634     |        |           |                                                                                                                               |
| 12                          | AA    | 1   | 208348395                 | 120.4695879           |                                      | 10                 | -0.053930899     |        |           |                                                                                                                               |
| 13                          | AA    | 1   | 210147485                 | 121.9613779           |                                      | 9                  | -0.073635914     |        |           |                                                                                                                               |
| 14                          | AA    | 1   | 211910691                 | 123.4234132           |                                      | 9                  | -0.087541648     |        |           |                                                                                                                               |
| 15                          | AA    | 1   | 218527234                 | 128.2400336           |                                      | 6                  | -0.056062356     |        |           |                                                                                                                               |
| 16                          | AA    | 2   | 3369867                   | 8.460233144           |                                      | 8                  | 0.081076721      |        |           |                                                                                                                               |
| 17                          | AA    | 2   | 4452933                   | 12.54822136           |                                      | 11                 | 0.119133386      | Inside | '30.2.17' | grmzm2g076<br>212_t01<br>'signalling.receptor kinases.DUF 26'                                                                 |
| 18                          | AA    | 2   | 5461777                   | 16.38371574           |                                      | 10                 | 0.080146925      |        |           |                                                                                                                               |
| 19                          | AA    | 2   | 6695031                   | 20.19476759           |                                      | 27                 | 0.044923744      |        |           |                                                                                                                               |
| 20                          | AA    | 2   | 10533238                  | 30.11324699           |                                      | 5                  | 0.050106955      |        |           |                                                                                                                               |

|       |   |           |             |    |              |        |           |                       |                                                                                                                        |
|-------|---|-----------|-------------|----|--------------|--------|-----------|-----------------------|------------------------------------------------------------------------------------------------------------------------|
| 21 AA | 2 | 11104224  | 31.84202766 | 21 | 0.071319845  | Inside | '29.4'    | grmzm2g102<br>088_t01 | 'protein.postranslational<br>modification'                                                                             |
| 22 AA | 2 | 13443804  | 37.94791551 | 22 | 0.054661567  |        |           |                       |                                                                                                                        |
| 23 AA | 2 | 20521754  | 51.29525101 | 5  | 0.086430763  |        |           |                       |                                                                                                                        |
| 24 AA | 2 | 24175937  | 56.21986729 | 6  | 0.144114822  |        |           |                       |                                                                                                                        |
| 25 AA | 2 | 37317423  | 65.59856319 | 51 | 0.074663447  |        |           |                       |                                                                                                                        |
| 26 AA | 2 | 186765375 | 97.99753568 | 60 | 0.070644387  |        |           |                       |                                                                                                                        |
| 27 AA | 2 | 186894631 | 98.25116993 | 31 | 0.074688245  | Inside | '27.3.35' | grmzm2g125<br>934_t01 | 'RNA.regulation of<br>transcription.bZIP<br>transcription factor<br>family'                                            |
| 28 AA | 2 | 209329786 | 120.0730566 | 6  | 0.043269516  |        |           |                       |                                                                                                                        |
| 29 AA | 2 | 215989909 | 128.8383944 | 6  | 0.040326516  |        |           |                       |                                                                                                                        |
| 30 AA | 2 | 217758767 | 131.4548964 | 10 | 0.05228333   |        |           |                       |                                                                                                                        |
| 31 AA | 3 | 106253820 | 58.5935399  | 18 | 0.080180593  |        |           |                       |                                                                                                                        |
| 32 AA | 3 | 136272706 | 62.99233029 | 6  | 0.116539144  |        |           |                       |                                                                                                                        |
| 33 AA | 3 | 146217490 | 65.77990892 | 10 | 0.108646925  |        |           |                       |                                                                                                                        |
| 34 AA | 3 | 170786664 | 81.70076623 | 6  | 0.085704188  |        |           |                       |                                                                                                                        |
| 35 AA | 3 | 173982599 | 84.12121149 | 71 | 0.098605713  |        |           |                       |                                                                                                                        |
| 36 AA | 3 | 176799382 | 87.90057838 | 11 | 0.102983913  | Inside | '27.3.26' | grmzm2g125<br>522_t01 | 'RNA.regulation of<br>transcription.MYB-<br>related transcription<br>factor family'                                    |
| 37 AA | 3 | 211702191 | 122.6221889 | 6  | -0.041297758 |        |           |                       |                                                                                                                        |
| 38 AA | 3 | 212222090 | 123.2709088 | 6  | -0.046587836 |        |           |                       |                                                                                                                        |
| 39 AA | 3 | 212226136 | 123.2759574 | 5  | -0.06529147  |        |           |                       |                                                                                                                        |
| 40 AA | 3 | 212726714 | 123.9011201 | 5  | -0.044492619 |        |           |                       |                                                                                                                        |
| 41 AA | 3 | 214950753 | 128.5482503 | 22 | -0.045348234 | Inside | '11.3'    | grmzm2g065<br>203_t01 | 'lipid<br>metabolism.Phospholipi<br>d synthesis'                                                                       |
| 42 AA | 4 | 171000056 | 79.4221761  | 40 | -0.050350535 |        |           |                       |                                                                                                                        |
| 43 AA | 4 | 171777409 | 80.83845057 | 9  | -0.04494486  |        |           |                       |                                                                                                                        |
| 44 AA | 4 | 171777978 | 80.83927823 | 30 | -0.046656729 |        |           |                       |                                                                                                                        |
| 45 AA | 4 | 172891786 | 82.70364317 | 8  | -0.057980397 | Inside | '27.3.3'  | grmzm2g111<br>415_t01 | 'RNA.regulation of<br>transcription.AP2/EREB<br>P, APETALA2/Ethylene-<br>responsive element<br>binding protein family' |

|       |   |           |              |    |              |        |               |                       |                                                                                               |
|-------|---|-----------|--------------|----|--------------|--------|---------------|-----------------------|-----------------------------------------------------------------------------------------------|
| 46 AA | 4 | 238824264 | 119.1769941  | 5  | -0.040095238 |        |               |                       |                                                                                               |
| 47 AA | 4 | 245327128 | 141.6682023  | 5  | -0.092328356 | Inside | '30.2.11'     | 348_t01               | 'signalling.receptor<br>kinases.leucine rich<br>repeat XI'                                    |
| 48 AA | 5 | 1122      | -0.317541556 | 5  | 0.044960637  |        |               |                       |                                                                                               |
| 49 AA | 5 | 1049462   | 0.606846713  | 32 | 0.05132495   |        |               |                       |                                                                                               |
| 50 AA | 5 | 1621759   | 2.147079874  | 12 | 0.055070047  |        |               |                       |                                                                                               |
| 51 AA | 5 | 2598377   | 6.596313039  | 23 | 0.043582718  | Inside | '16.8.3'      | 881_t03               | 'secondary<br>metabolism.flavonoids.di<br>hydroflavonols'                                     |
| 52 AA | 5 | 2608498   | 6.662437668  | 8  | 0.045011664  | Inside | '16.8.3'      | 865_t01               | 'secondary<br>metabolism.flavonoids.di<br>hydroflavonols'                                     |
| 53 AA | 5 | 25375392  | 54.32828941  | 25 | 0.052640963  | Inside | '34.19.2'     | 446_t01               | 'transport.Major Intrinsic<br>Proteins.TIP'                                                   |
| 54 AA | 5 | 27056845  | 54.96362449  | 17 | 0.05259327   |        |               |                       |                                                                                               |
| 55 AA | 5 | 27066959  | 54.96744605  | 6  | 0.0486529    | Inside | '30.2.17'     | 862_t01               | 'signalling.receptor<br>kinases.DUF 26'                                                       |
| 56 AA | 5 | 27983433  | 55.3137347   | 6  | 0.164199593  |        |               |                       |                                                                                               |
| 57 AA | 5 | 28303009  | 55.43448613  | 8  | 0.241124487  |        |               |                       |                                                                                               |
| 58 AA | 5 | 29915257  | 56.04367218  | 6  | 0.057108904  | Inside | '27.3.7'      | 550_t01               | 'RNA.regulation of<br>transcription.C2C2(Zn)<br>CO-like, Constans-like<br>zinc finger family' |
| 59 AA | 5 | 30338901  | 56.28511551  | 23 | 0.221984742  |        |               |                       |                                                                                               |
| 60 AA | 5 | 30990738  | 56.84135946  | 15 | 0.062976606  |        |               |                       |                                                                                               |
| 61 AA | 5 | 31224995  | 57.04126226  | 6  | 0.071656737  |        |               |                       |                                                                                               |
| 62 AA | 5 | 61094522  | 63.52954633  | 39 | 0.213909802  | Inside | '29.5.11.4.2' | grmzm2g069<br>923_t02 | 'protein.degradation.ubiq<br>uitin.E3.RING'                                                   |

|       |   |           |              |    |              |        |           |                                                                                                                |
|-------|---|-----------|--------------|----|--------------|--------|-----------|----------------------------------------------------------------------------------------------------------------|
| 63 AA | 5 | 89493802  | 69.57132155  | 5  | -0.046703904 |        |           |                                                                                                                |
| 64 AA | 5 | 185678096 | 95.1872289   | 9  | -0.087360449 |        |           |                                                                                                                |
| 65 AA | 5 | 191362737 | 100.706813   | 70 | 0.073417146  |        |           |                                                                                                                |
| 66 AA | 5 | 200532850 | 108.3793509  | 5  | -0.123414326 |        |           |                                                                                                                |
| 67 AA | 5 | 202772744 | 110.6933233  | 16 | -0.07001925  |        |           |                                                                                                                |
| 68 AA | 5 | 204749015 | 116.8860416  | 7  | 0.083646321  |        |           |                                                                                                                |
| 69 AA | 5 | 206467622 | 122.460663   | 14 | -0.121162674 |        |           |                                                                                                                |
| 70 AA | 5 | 207521465 | 125.022936   | 8  | -0.056063751 |        |           |                                                                                                                |
| 71 AA | 5 | 207525531 | 125.0317036  | 16 | -0.085116692 | Inside | '26.7'    | grmzm2g059 'misc.oxidases - copper, flavone etc.'                                                              |
| 72 AA | 5 | 209222556 | 128.3660113  | 6  | -0.173721735 |        |           |                                                                                                                |
| 73 AA | 5 | 211196887 | 135.9702305  | 23 | -0.069770475 |        |           |                                                                                                                |
| 74 AA | 5 | 211196920 | 135.9703687  | 64 | -0.080191679 |        |           |                                                                                                                |
| 75 AA | 6 | 3992126   | -6.319411877 | 5  | -0.093170865 |        |           |                                                                                                                |
| 76 AA | 6 | 25737849  | 7.832137091  | 22 | -0.098932689 |        |           |                                                                                                                |
| 77 AA | 6 | 31537911  | 8.165545093  | 17 | -0.116422372 |        |           |                                                                                                                |
| 78 AA | 6 | 79774320  | 11.21454839  | 11 | -0.073829076 |        |           |                                                                                                                |
| 79 AA | 6 | 97578306  | 23.60510141  | 10 | -0.064507888 | Inside | '11.9.2.1 | grmzm2g322 'lipid metabolism.lipid degradation.lipases.triacylglycerol lipase'                                 |
| 80 AA | 6 | 97988317  | 23.94996475  | 41 | -0.052440749 |        |           |                                                                                                                |
| 81 AA | 6 | 98199018  | 24.12718696  | 9  | -0.053340471 | Inside | '29.5'    | grmzm2g073 'protein.degradation'                                                                               |
| 82 AA | 6 | 98204433  | 24.13174155  | 5  | -0.05362577  | Inside | '29.5'    | grmzm2g073 'protein.degradation'                                                                               |
| 83 AA | 6 | 98282571  | 24.19746402  | 8  | -0.0579035   | Inside | '27.3.38' | grmzm2g180 'RNA.regulation of transcription.AT-rich interaction domain containing transcription factor family' |
| 84 AA | 6 | 99986756  | 25.63086689  | 5  | -0.061329207 |        |           |                                                                                                                |
| 85 AA | 6 | 110900537 | 37.5884191   | 5  | -0.050221184 |        |           |                                                                                                                |
| 86 AA | 6 | 163949428 | 95.77601009  | 10 | 0.05979466   |        |           |                                                                                                                |
| 87 AA | 6 | 164286396 | 96.9462491   | 7  | 0.091622048  |        |           |                                                                                                                |

|        |   |           |             |    |              |        |            |                       |                                                                                       |
|--------|---|-----------|-------------|----|--------------|--------|------------|-----------------------|---------------------------------------------------------------------------------------|
| 88 AA  | 6 | 165260207 | 101.8645066 | 9  | 0.099911569  | Inside | '11.1.10'  | grmzm2g160<br>417_t01 | 'lipid metabolism.FA<br>synthesis and FA<br>elongation.beta ketoacyl<br>CoA synthase' |
| 89 AA  | 7 | 27056327  | 46.72949889 | 30 | 0.069854871  |        |            |                       |                                                                                       |
| 90 AA  | 7 | 28113557  | 46.92394381 | 6  | 0.042729427  |        |            |                       |                                                                                       |
| 91 AA  | 7 | 28365776  | 46.97033173 | 8  | 0.044151146  |        |            |                       |                                                                                       |
| 92 AA  | 7 | 37151920  | 48.23780461 | 7  | 0.043532305  |        |            |                       |                                                                                       |
| 93 AA  | 7 | 69012950  | 49.23292513 | 5  | 0.055519521  |        |            |                       |                                                                                       |
| 94 AA  | 7 | 83079854  | 49.85510044 | 8  | 0.04954641   |        |            |                       |                                                                                       |
| 95 AA  | 7 | 84174593  | 49.90284891 | 8  | 0.04989524   |        |            |                       |                                                                                       |
| 96 AA  | 7 | 139404320 | 77.80580845 | 69 | 0.087922424  |        |            |                       |                                                                                       |
| 97 AA  | 7 | 143287112 | 81.20148454 | 20 | 0.054812272  | Inside | '13.1.6.5' | grmzm2g416<br>484_t01 | 'amino acid<br>metabolism.synthesis.aro<br>matic aa.tryptophan'                       |
| 98 AA  | 7 | 150564610 | 88.45717741 | 32 | 0.06982965   | Inside | '10.2.1'   | grmzm2g103<br>972_t01 | 'cell wall.cellulose<br>synthesis.cellulose<br>synthase'                              |
| 99 AA  | 7 | 167987389 | 129.6248256 | 6  | -0.118145535 |        |            |                       |                                                                                       |
| 100 AA | 7 | 169227583 | 134.2608759 | 5  | -0.06723496  | Inside | '16.2.1.4' | grmzm2g307<br>437_t01 | 'secondary<br>metabolism.phenylpropa<br>noids.lignin<br>biosynthesis.HCT'             |
| 101 AA | 8 | 103390158 | 58.85914851 | 73 | 0.067148754  |        |            |                       |                                                                                       |
| 102 AA | 8 | 117265267 | 63.49683053 | 11 | 0.076581176  | Inside | '34.12'    | grmzm2g366<br>851_t01 | 'transport.metal'<br>'RNA.regulation of<br>transcription.C2H2 zinc<br>finger family'  |
| 103 AA | 8 | 161883485 | 91.64355886 | 10 | -0.044006499 | Inside | '27.3.11'  | ac183950.2_f<br>gt002 |                                                                                       |
| 104 AA | 8 | 161918620 | 91.67206646 | 11 | -0.049289191 |        |            |                       |                                                                                       |
| 105 AA | 8 | 161918881 | 91.67227822 | 36 | -0.053035985 |        |            |                       |                                                                                       |
| 106 AA | 8 | 161918960 | 91.67234232 | 7  | -0.052130376 |        |            |                       |                                                                                       |
| 107 AA | 8 | 163479600 | 95.34210376 | 11 | -0.050996234 |        |            |                       |                                                                                       |
| 108 AA | 8 | 170533744 | 122.5329248 | 12 | -0.071952615 |        |            |                       |                                                                                       |
| 109 AA | 8 | 170538447 | 122.5649034 | 10 | -0.073601987 |        |            |                       |                                                                                       |

|        |    |           |             |    |              |        |         |                                                  |
|--------|----|-----------|-------------|----|--------------|--------|---------|--------------------------------------------------|
| 110 AA | 8  | 170538683 | 122.5665081 | 58 | -0.067975625 |        |         |                                                  |
| 111 AA | 9  | 5956414   | 5.403679997 | 8  | -0.064234269 |        |         |                                                  |
| 112 AA | 9  | 6999573   | 8.221311595 | 5  | -0.059674728 |        |         |                                                  |
| 113 AA | 9  | 7239482   | 8.869319404 | 9  | -0.047569805 |        |         |                                                  |
| 114 AA | 9  | 7239499   | 8.869365322 | 5  | -0.043097808 |        |         |                                                  |
| 115 AA | 9  | 9143611   | 13.42656327 | 6  | -0.065774986 | Inside | '33.99' | grmzm2g088 'development.unspecific<br>053_t01 d' |
| 116 AA | 9  | 9143948   | 13.42709594 | 23 | -0.0560366   |        |         |                                                  |
| 117 AA | 9  | 20663923  | 36.69381857 | 30 | -0.056366108 |        |         |                                                  |
| 118 AA | 9  | 20665105  | 36.69570972 | 16 | -0.062945098 |        |         |                                                  |
| 119 AA | 9  | 20668477  | 36.70110477 | 32 | -0.060619679 |        |         |                                                  |
| 120 AA | 9  | 23215839  | 39.99840064 | 20 | -0.058749345 |        |         |                                                  |
| 121 AA | 9  | 86468357  | 46.72572703 | 12 | -0.079201882 |        |         |                                                  |
| 122 AA | 9  | 116766687 | 57.30110688 | 5  | 0.11081529   |        |         |                                                  |
| 123 AA | 9  | 116766688 | 57.30110724 | 6  | 0.112627991  |        |         |                                                  |
| 124 AA | 9  | 133018761 | 68.62115268 | 53 | -0.087203152 |        |         |                                                  |
| 125 AA | 9  | 135396489 | 72.43328428 | 16 | -0.066126002 |        |         |                                                  |
| 126 AA | 9  | 140748270 | 85.13070924 | 14 | 0.115475213  | Inside | '20.1'  | grmzm2g393<br>507_t01 'stress.biotic'            |
| 127 AA | 10 | 18523635  | 33.86783022 | 6  | -0.110952691 |        |         |                                                  |
| 128 AA | 10 | 99357506  | 43.32459092 | 9  | -0.055016754 |        |         |                                                  |
| 129 AA | 10 | 102164870 | 43.55066643 | 36 | -0.048664179 |        |         |                                                  |
| 130 AA | 10 | 102628153 | 43.57658233 | 13 | -0.054721851 |        |         |                                                  |
| 131 AA | 10 | 111326819 | 44.71918576 | 13 | -0.049289342 |        |         |                                                  |
| 132 AA | 10 | 140890733 | 72.76364342 | 23 | 0.113234282  | Inside | '10.7'  | grmzm2g091<br>303_t01 'cell wall.modification'   |
| 133 AA | 10 | 143035801 | 79.92097141 | 6  | 0.075903997  |        |         |                                                  |
| 134 AA | 10 | 146203306 | 89.79952703 | 10 | 0.075504717  |        |         |                                                  |
| 135 AA | 10 | 146234149 | 89.92263189 | 71 | 0.074311201  |        |         |                                                  |

|          |    |           |             |    |              |        |           |                                                                                                         |
|----------|----|-----------|-------------|----|--------------|--------|-----------|---------------------------------------------------------------------------------------------------------|
| 136 AA   | 10 | 148094143 | 99.83248299 | 14 | 0.059544285  |        |           |                                                                                                         |
| 137 AA   | 10 | 148490503 | 102.0543415 | 7  | 0.053929166  | Inside | '29.4'    | grmzm2g104 'protein.postranslational<br>658_t07 modification'                                           |
| 138 AA   | 10 | 148496397 | 102.0873812 | 22 | 0.050154105  |        |           |                                                                                                         |
| 139 Chla | 1  | 64135223  | 73.46224774 | 7  | -1.078365591 |        |           |                                                                                                         |
| 140 Chla | 1  | 68902676  | 76.2644894  | 18 | -1.11398638  |        |           |                                                                                                         |
| 141 Chla | 1  | 70951065  | 77.30587192 | 7  | -1.009978169 |        |           |                                                                                                         |
| 142 Chla | 1  | 71560037  | 77.6154678  | 8  | -1.079988686 |        |           |                                                                                                         |
| 143 Chla | 1  | 114166513 | 89.09571398 | 6  | -1.00096502  | Inside | '20.1'    | grmzm2g107<br>851_t01 'stress.biotic'                                                                   |
| 144 Chla | 1  | 126428605 | 89.3753375  | 5  | -1.429246348 |        |           |                                                                                                         |
| 145 Chla | 1  | 139906399 | 89.5123698  | 6  | -1.832781348 |        |           |                                                                                                         |
| 146 Chla | 1  | 179696720 | 96.44277983 | 6  | 2.546725312  |        |           |                                                                                                         |
| 147 Chla | 1  | 280711700 | 175.6831083 | 16 | -1.675800132 |        |           |                                                                                                         |
| 148 Chla | 1  | 283540151 | 178.0419378 | 6  | -1.065382143 |        |           |                                                                                                         |
| 149 Chla | 1  | 283829657 | 178.2988059 | 23 | -1.082471106 |        |           |                                                                                                         |
| 150 Chla | 1  | 283830436 | 178.2994971 | 6  | -1.062943975 |        |           |                                                                                                         |
| 151 Chla | 1  | 284054336 | 178.4981554 | 14 | -1.146037697 | Inside | '31.1'    | grmzm2g058<br>734_t01 'cell.organisation'                                                               |
| 152 Chla | 2  | 1944162   | 3.262633877 | 5  | 0.896831894  |        |           |                                                                                                         |
| 153 Chla | 2  | 2021345   | 3.611041843 | 12 | 0.871536011  |        |           |                                                                                                         |
| 154 Chla | 2  | 2211569   | 4.4697226   | 48 | 0.962856414  | Inside | '30.2.11' | grmzm2g452 'signalling.receptor<br>142_t01 kinases.leucine rich<br>repeat XI'                           |
| 155 Chla | 2  | 3128671   | 6.982329207 | 6  | 0.876581025  | Inside | '27.3.20' | grmzm2g035 'RNA.regulation of<br>370_t01 transcription.G2-like<br>transcription factor<br>family, GARP' |

|          |   |           |             |    |              |        |         |                       |                                                                        |
|----------|---|-----------|-------------|----|--------------|--------|---------|-----------------------|------------------------------------------------------------------------|
| 156 Chla | 2 | 23800488  | 55.83244658 | 6  | 1.46067929   | Inside | '34.16' | grmzm2g177<br>812_t02 | 'transport.ABC<br>transporters and<br>multidrug resistance<br>systems' |
| 157 Chla | 2 | 23881650  | 55.91619654 | 8  | 1.16323104   |        |         |                       |                                                                        |
| 158 Chla | 2 | 24284899  | 56.33230369 | 13 | 1.367200877  |        |         |                       |                                                                        |
| 159 Chla | 2 | 24312309  | 56.3605877  | 7  | 1.310766647  | Inside | '33.99' | grmzm2g434<br>557_t01 | 'development.unspecifie<br>d'                                          |
| 160 Chla | 2 | 25437487  | 57.05362901 | 6  | 1.199994036  |        |         |                       |                                                                        |
| 161 Chla | 2 | 25437559  | 57.05368243 | 5  | 1.144917046  |        |         |                       |                                                                        |
| 162 Chla | 2 | 26691735  | 57.98437622 | 14 | 1.092321355  | Inside | '20.1'  | grmzm2g474<br>575_t01 | 'stress.biotic'                                                        |
| 163 Chla | 2 | 26773008  | 58.04468695 | 6  | 0.928679226  |        |         |                       |                                                                        |
| 164 Chla | 2 | 44156463  | 69.46377693 | 6  | -2.024801273 |        |         |                       |                                                                        |
| 165 Chla | 2 | 175505228 | 86.58930765 | 7  | 1.255193753  |        |         |                       |                                                                        |
| 166 Chla | 3 | 13632616  | 40.54644966 | 5  | 0.97166907   |        |         |                       |                                                                        |
| 167 Chla | 3 | 17328400  | 45.32523697 | 9  | 1.191986808  | Inside | '30.5'  | grmzm2g166<br>064_t01 | 'signalling.G-proteins'                                                |
| 168 Chla | 3 | 20129322  | 48.94693416 | 8  | 1.760642777  |        |         |                       |                                                                        |
| 169 Chla | 3 | 27862522  | 53.36115573 | 10 | 1.423867597  |        |         |                       |                                                                        |
| 170 Chla | 3 | 142821459 | 64.10032051 | 8  | 2.211347578  |        |         |                       |                                                                        |
| 171 Chla | 3 | 176382057 | 87.28804733 | 7  | 2.673712072  |        |         |                       |                                                                        |
| 172 Chla | 3 | 212248700 | 123.3041123 | 17 | -1.457436983 | Inside | '26.28' | grmzm2g047<br>129_t02 | 'misc.GDSL-motif lipase'                                               |
| 173 Chla | 3 | 213848077 | 126.6554907 | 48 | -1.687766558 | Inside | '1.5.1' | grmzm2g348<br>512_t03 | 'PS.carbon concentrating<br>mechanism.C4'                              |
| 174 Chla | 3 | 213848298 | 126.6560335 | 10 | -1.668877969 | Inside | '1.5.1' | grmzm2g348<br>512_t03 | 'PS.carbon concentrating<br>mechanism.C4'                              |



|          |   |           |             |    |              |        |          |                       |                                                                        |
|----------|---|-----------|-------------|----|--------------|--------|----------|-----------------------|------------------------------------------------------------------------|
| 175 Chla | 3 | 213894582 | 126.7697196 | 24 | -1.531651849 | Inside | '1.5.1'  | grmzm2g121<br>878_t04 | 'PS.carbon concentrating<br>mechanism.C4'                              |
| 176 Chla | 3 | 214166666 | 127.4380314 | 10 | -1.452335655 | Inside | '16.8.3' | grmzm2g029<br>547_t01 | 'secondary<br>metabolism.flavonoids.di<br>hydroflavonols'              |
| 177 Chla | 3 | 214171011 | 127.4487039 | 27 | -1.512209361 | Inside | '16.8.3' | grmzm2g029<br>547_t01 | 'secondary<br>metabolism.flavonoids.di<br>hydroflavonols'              |
| 178 Chla | 3 | 215371494 | 129.1375553 | 18 | -1.61194824  |        |          |                       |                                                                        |
| 179 Chla | 3 | 215732765 | 129.6435644 | 14 | -1.22775052  |        |          |                       |                                                                        |
| 180 Chla | 4 | 25857163  | 48.23906117 | 17 | 1.151000831  |        |          |                       |                                                                        |
| 181 Chla | 4 | 33663511  | 51.99288995 | 5  | 1.206422642  | Inside | '34.16'  | grmzm2g441<br>722_t01 | 'transport.ABC<br>transporters and<br>multidrug resistance<br>systems' |
| 182 Chla | 4 | 35498708  | 52.93310614 | 10 | 1.229496466  |        |          |                       |                                                                        |
| 183 Chla | 4 | 36054065  | 53.09837236 | 5  | 1.000540179  | Inside | '33.99'  | grmzm2g407<br>913_t01 | 'development.unspecifie<br>d'                                          |
| 184 Chla | 4 | 172424061 | 81.94381184 | 13 | -3.771641365 |        |          |                       |                                                                        |
| 185 Chla | 4 | 177225726 | 88.56915079 | 8  | -1.412797811 |        |          |                       |                                                                        |
| 186 Chla | 4 | 177329556 | 88.69420796 | 10 | -2.097767711 |        |          |                       |                                                                        |
| 187 Chla | 4 | 177855845 | 90.07794504 | 8  | -2.176405818 |        |          |                       |                                                                        |
| 188 Chla | 5 | 166987510 | 78.8793885  | 5  | -2.122907288 |        |          |                       |                                                                        |
| 189 Chla | 5 | 189389642 | 98.99515772 | 8  | -1.297088271 |        |          |                       |                                                                        |
| 190 Chla | 5 | 205646722 | 119.7979212 | 13 | -1.057085938 | Inside | '17.2.2' | grmzm2g074<br>267_t01 | 'hormone<br>metabolism.auxin.signal<br>transduction'                   |
| 191 Chla | 5 | 205662084 | 119.8477507 | 30 | -1.106120646 |        |          |                       |                                                                        |

|          |    |           |             |    |              |        |           |                       |                                                                      |
|----------|----|-----------|-------------|----|--------------|--------|-----------|-----------------------|----------------------------------------------------------------------|
| 192 Chla | 5  | 205842860 | 120.4341313 | 9  | -1.314471195 | Inside | '34.19.2' | grmzm2g028<br>325_t01 | 'transport.Major Intrinsic Proteins.TIP'                             |
|          |    |           |             |    |              |        |           |                       | 'RNA.regulation of transcription.bHLH,Basic Helix-Loop-Helix family' |
| 193 Chla | 5  | 208092874 | 126.5365424 | 8  | -1.242235214 | Inside | '27.3.6'  | grmzm2g045<br>883_t01 |                                                                      |
| 194 Chla | 5  | 208411778 | 126.7985254 | 6  | -1.034251892 |        |           |                       |                                                                      |
| 195 Chla | 5  | 212548689 | 141.0955085 | 7  | -1.625212605 |        |           |                       |                                                                      |
| 196 Chla | 6  | 125640414 | 46.48436302 | 14 | -2.050901443 |        |           |                       |                                                                      |
| 197 Chla | 6  | 125640415 | 46.48436337 | 17 | -2.07079645  |        |           |                       |                                                                      |
| 198 Chla | 6  | 159559960 | 82.11064054 | 5  | -0.859575964 | Inside | '20.2.99' | grmzm2g043<br>035_t01 | 'stress.abiotic.unspecific'                                          |
| 199 Chla | 7  | 33122197  | 47.86676722 | 19 | 1.636985743  |        |           |                       |                                                                      |
| 200 Chla | 7  | 35108196  | 48.14677419 | 7  | 2.022809364  |        |           |                       |                                                                      |
| 201 Chla | 7  | 35397449  | 48.15875943 | 7  | 1.157786171  |        |           |                       |                                                                      |
| 202 Chla | 7  | 42768959  | 48.86677354 | 5  | 0.867518993  |        |           |                       |                                                                      |
| 203 Chla | 7  | 125979602 | 66.69618807 | 7  | 2.632081769  |        |           |                       |                                                                      |
| 204 Chla | 7  | 157918090 | 102.0917472 | 6  | 1.307677429  |        |           |                       |                                                                      |
| 205 Chla | 8  | 8405589   | 21.20394308 | 18 | 1.770676205  |        |           |                       |                                                                      |
| 206 Chla | 9  | 21661674  | 38.29017663 | 5  | -1.285619712 |        |           |                       |                                                                      |
| 207 Chla | 9  | 21670412  | 38.30415705 | 15 | -1.744014465 |        |           |                       |                                                                      |
| 208 Chla | 9  | 23215197  | 39.99779948 | 11 | -1.046360749 | Inside | '2.1.2.2' | grmzm2g024<br>993_t01 | 'major CHO metabolism.synthesis.starch.starch synthase'              |
| 209 Chla | 9  | 26434264  | 43.26084016 | 59 | -1.065132951 |        |           |                       |                                                                      |
| 210 Chla | 10 | 143379980 | 80.93578714 | 10 | 1.736257572  |        |           |                       |                                                                      |
| 211 Chla | 10 | 145845320 | 88.37068362 | 8  | 1.167874183  |        |           |                       |                                                                      |
| 212 Chla | 10 | 148232936 | 100.610509  | 8  | 1.106911557  |        |           |                       |                                                                      |
| 213 Chla | 10 | 148450393 | 101.8294985 | 36 | 1.201764063  |        |           |                       |                                                                      |
| 214 Chla | 10 | 148497003 | 102.0907782 | 6  | 1.10547339   | Inside | '29.4'    | grmzm2g104<br>658_t09 | 'protein.postranslational modification'                              |
| 215 Chla | 10 | 148499295 | 102.1036264 | 9  | 1.10891694   |        |           |                       |                                                                      |
| 216 Chlb | 1  | 97031439  | 87.3597852  | 18 | 0.627113181  |        |           |                       |                                                                      |
| 217 Chlb | 1  | 101441507 | 87.90304019 | 5  | 0.237222688  |        |           |                       |                                                                      |
| 218 Chlb | 1  | 103855930 | 88.27009228 | 13 | 0.528617492  |        |           |                       |                                                                      |
| 219 Chlb | 1  | 138458661 | 89.49765026 | 6  | 0.636936144  |        |           |                       |                                                                      |
| 220 Chlb | 1  | 141762525 | 89.53124152 | 15 | 0.677150275  |        |           |                       |                                                                      |
| 221 Chlb | 1  | 146716486 | 89.58160975 | 18 | 37.87537959  |        |           |                       |                                                                      |

|     |      |   |           |             |    |              |        |          |                                                                                                            |
|-----|------|---|-----------|-------------|----|--------------|--------|----------|------------------------------------------------------------------------------------------------------------|
| 222 | Chlb | 1 | 150498647 | 89.94777187 | 5  | 0.650291443  |        |          |                                                                                                            |
| 223 | Chlb | 1 | 163239765 | 91.63742221 | 8  | 0.375622346  |        |          |                                                                                                            |
| 224 | Chlb | 1 | 181947110 | 97.49187685 | 6  | -0.41770935  |        |          |                                                                                                            |
| 225 | Chlb | 1 | 187131514 | 101.742233  | 14 | -0.546446647 |        |          |                                                                                                            |
| 226 | Chlb | 1 | 202975799 | 116.1587985 | 10 | -0.587258205 |        |          |                                                                                                            |
| 227 | Chlb | 1 | 205257253 | 117.519266  | 7  | -0.562896571 |        |          |                                                                                                            |
| 228 | Chlb | 1 | 225624776 | 133.6401321 | 12 | -0.665556716 |        |          |                                                                                                            |
|     |      |   |           |             |    |              |        |          |                                                                                                            |
| 229 | Chlb | 1 | 228532522 | 135.6859584 | 17 | -0.333710526 | Inside | '31.1'   | grmzm2g113<br>202_t01 'cell.organisation'                                                                  |
| 230 | Chlb | 1 | 285864445 | 180.8598811 | 14 | -1.175768961 |        |          |                                                                                                            |
| 231 | Chlb | 1 | 291825337 | 191.0554431 | 5  | 1.628826253  |        |          |                                                                                                            |
| 232 | Chlb | 1 | 294322791 | 196.7251432 | 76 | 0.398027959  |        |          |                                                                                                            |
|     |      |   |           |             |    |              |        |          |                                                                                                            |
| 233 | Chlb | 1 | 294652893 | 197.2197826 | 22 | -15.83957184 | Inside | '27.3.9' | grmzm2g114<br>775_t01 'RNA.regulation of<br>transcription.C2C2(Zn)<br>GATA transcription<br>factor family' |
| 234 | Chlb | 1 | 296022922 | 199.7554621 | 13 | 5.61697755   |        |          |                                                                                                            |
| 235 | Chlb | 1 | 299894464 | 204.0221873 | 84 | 3.122396653  |        |          |                                                                                                            |
| 236 | Chlb | 2 | 5923229   | 18.30060959 | 6  | -0.432741117 |        |          |                                                                                                            |
| 237 | Chlb | 2 | 6166067   | 18.83309554 | 9  | -0.313343721 |        |          |                                                                                                            |
| 238 | Chlb | 2 | 69741938  | 75.18951102 | 10 | 0.13773773   |        |          |                                                                                                            |
| 239 | Chlb | 2 | 148856409 | 80.60314611 | 22 | 8.071915262  |        |          |                                                                                                            |
|     |      |   |           |             |    |              |        |          |                                                                                                            |
| 240 | Chlb | 2 | 149429597 | 80.70039502 | 22 | -9.971712092 | Inside | '27.4'   | grmzm2g444<br>808_t01 'RNA.RNA binding'                                                                    |
| 241 | Chlb | 2 | 161877261 | 82.49985253 | 8  | -4.135727968 |        |          |                                                                                                            |
| 242 | Chlb | 2 | 172704855 | 85.0182288  | 5  | 0.153284287  |        |          |                                                                                                            |
| 243 | Chlb | 2 | 185915577 | 96.74331495 | 10 | 0.145544258  |        |          |                                                                                                            |
| 244 | Chlb | 2 | 186273082 | 97.1970181  | 7  | 0.137513277  |        |          |                                                                                                            |
| 245 | Chlb | 2 | 186375668 | 97.32720814 | 5  | 0.150539465  |        |          |                                                                                                            |
| 246 | Chlb | 2 | 191111571 | 102.3694697 | 8  | 0.135633799  |        |          |                                                                                                            |
|     |      |   |           |             |    |              |        |          |                                                                                                            |
| 247 | Chlb | 2 | 192123634 | 103.2729858 | 11 | 0.120175148  | Inside | '26.10'  | grmzm2g034<br>471_t01 'misc.cytochrome P450'                                                               |
| 248 | Chlb | 3 | 139536229 | 63.68477456 | 6  | 0.147217046  |        |          |                                                                                                            |
| 249 | Chlb | 3 | 144468014 | 65.40015782 | 12 | 0.134612198  |        |          |                                                                                                            |
| 250 | Chlb | 3 | 147011536 | 66.05909566 | 44 | 0.123495734  |        |          |                                                                                                            |
| 251 | Chlb | 3 | 148514014 | 66.58736723 | 21 | 0.148804648  |        |          |                                                                                                            |
| 252 | Chlb | 3 | 212765471 | 123.9963177 | 8  | -0.336927049 |        |          |                                                                                                            |

|          |   |           |             |    |              |        |           |         |                                                            |
|----------|---|-----------|-------------|----|--------------|--------|-----------|---------|------------------------------------------------------------|
| 253 Chlb | 3 | 216243829 | 131.9068925 | 14 | -0.259823327 |        |           |         |                                                            |
| 254 Chlb | 4 | 10192700  | 27.53975118 | 5  | -0.334206161 | Inside | '30.2.11' | 398_t01 | 'signalling.receptor<br>kinases.leucine rich<br>repeat XI' |
| 255 Chlb | 4 | 10198136  | 27.55916751 | 33 | -0.283755098 |        |           |         |                                                            |
| 256 Chlb | 4 | 10624506  | 29.08207781 | 6  | -0.499306784 |        |           |         |                                                            |
| 257 Chlb | 4 | 154415397 | 65.4507691  | 5  | -0.310092928 |        |           |         |                                                            |
| 258 Chlb | 4 | 157107343 | 68.51092069 | 5  | -0.175013014 |        |           |         |                                                            |
| 259 Chlb | 4 | 159175723 | 70.53286161 | 16 | -0.172099323 | Inside | '27.3.80' | 365_t01 | grmzm2g069 'RNA.regulation of<br>transcription.zf-HD'      |
| 260 Chlb | 4 | 241996729 | 128.0064472 | 6  | 3.240118253  |        |           |         |                                                            |
| 261 Chlb | 4 | 242374367 | 129.5365429 | 7  | -2.331473365 |        |           |         |                                                            |
| 262 Chlb | 4 | 245553732 | 143.0029237 | 5  | 0.469486536  |        |           |         |                                                            |
| 263 Chlb | 5 | 2383652   | 5.193426861 | 6  | -0.572992605 |        |           |         |                                                            |
| 264 Chlb | 5 | 6303981   | 23.51266789 | 6  | 0.790335738  |        |           |         |                                                            |
| 265 Chlb | 5 | 20023828  | 50.73599959 | 10 | 0.15378392   |        |           |         |                                                            |
| 266 Chlb | 5 | 26723660  | 54.83773092 | 24 | 0.136021297  |        |           |         |                                                            |
| 267 Chlb | 5 | 35357979  | 58.09472562 | 36 | 0.135646841  |        |           |         |                                                            |
| 268 Chlb | 5 | 45813768  | 59.90312559 | 5  | 0.138663161  |        |           |         |                                                            |
| 269 Chlb | 6 | 162877409 | 92.80071368 | 5  | 0.254136304  |        |           |         |                                                            |
| 270 Chlb | 7 | 1921276   | 4.495740497 | 6  | 0.440671843  |        |           |         |                                                            |
| 271 Chlb | 7 | 2047654   | 4.972450239 | 9  | 0.308546552  |        |           |         |                                                            |
| 272 Chlb | 7 | 5043354   | 21.45653923 | 59 | -0.623660171 | Inside | '26.28'   | 866_t01 | grmzm2g060<br>'misc.GDSL-motif lipase'                     |
| 273 Chlb | 7 | 5299542   | 22.83360349 | 5  | -0.725829344 | Inside | '34.2'    | 063_t01 | grmzm2g142<br>'transport.sugars'                           |
| 274 Chlb | 7 | 6484300   | 28.48085938 | 7  | -0.385308166 |        |           |         |                                                            |
| 275 Chlb | 7 | 9145904   | 33.10358602 | 7  | -0.455155264 |        |           |         |                                                            |
| 276 Chlb | 7 | 142898891 | 81.10232141 | 46 | -0.930589021 |        |           |         |                                                            |
| 277 Chlb | 7 | 151513769 | 89.4065889  | 57 | 2.205527693  |        |           |         |                                                            |
| 278 Chlb | 7 | 152461246 | 91.18872855 | 6  | 0.1813481    |        |           |         |                                                            |
| 279 Chlb | 7 | 157011468 | 100.2121602 | 5  | -1.389177806 |        |           |         |                                                            |

|     |      |    |           |             |    |              |        |                      |                                                                                                           |
|-----|------|----|-----------|-------------|----|--------------|--------|----------------------|-----------------------------------------------------------------------------------------------------------|
| 280 | Chlb | 7  | 157185116 | 100.5721631 | 5  | -1.554880555 |        |                      |                                                                                                           |
| 281 | Chlb | 7  | 157532548 | 101.2924508 | 11 | -1.522378582 |        |                      |                                                                                                           |
| 282 | Chlb | 7  | 164316372 | 116.7981854 | 5  | -0.786680562 |        |                      |                                                                                                           |
| 283 | Chlb | 7  | 167232557 | 126.3442442 | 8  | 0.152254886  |        |                      |                                                                                                           |
| 284 | Chlb | 7  | 167233412 | 126.3479602 | 14 | 0.1415427    |        |                      |                                                                                                           |
| 285 | Chlb | 8  | 926070    | 1.886736364 | 14 | 0.271650989  | Inside | '27.3.6'             | grmzm2g387<br>528_t01<br>'RNA.regulation of<br>transcription.bHLH,Basi<br>c Helix-Loop-Helix<br>family'   |
| 286 | Chlb | 8  | 1359223   | 2.966202574 | 8  | 0.123826391  |        |                      |                                                                                                           |
| 287 | Chlb | 8  | 99959295  | 57.50014689 | 6  | -0.51065178  |        |                      |                                                                                                           |
| 288 | Chlb | 8  | 147589704 | 77.10076187 | 7  | -0.197854431 |        |                      |                                                                                                           |
| 289 | Chlb | 8  | 147830284 | 77.29378758 | 5  | -0.28678081  | Inside | '29.2.1.2<br>.2.518' | grmzm2g126<br>928_t01<br>'protein.synthesis.riboso<br>mal<br>protein.eukaryotic.60S<br>subunit.L18A'      |
| 290 | Chlb | 8  | 147830665 | 77.29409327 | 7  | -0.289989168 | Inside | '29.2.1.2<br>.2.518' | grmzm2g126<br>928_t01<br>'protein.synthesis.riboso<br>mal<br>protein.eukaryotic.60S<br>subunit.L18A'      |
| 291 | Chlb | 8  | 152152815 | 80.797802   | 13 | -0.348119811 |        |                      |                                                                                                           |
| 292 | Chlb | 9  | 8793952   | 12.87388515 | 8  | -0.136620476 |        |                      |                                                                                                           |
| 293 | Chlb | 9  | 9141388   | 13.42304955 | 6  | -0.254049865 |        |                      |                                                                                                           |
| 294 | Chlb | 9  | 23231768  | 40.03154801 | 10 | -0.113528991 |        |                      |                                                                                                           |
| 295 | Chlb | 9  | 25023438  | 42.41159442 | 6  | -0.114018927 |        |                      |                                                                                                           |
| 296 | Chlb | 9  | 27036374  | 43.61692207 | 7  | -0.146623845 |        |                      |                                                                                                           |
| 297 | Chlb | 9  | 64396713  | 45.73393561 | 5  | -0.145382509 |        |                      |                                                                                                           |
| 298 | Chlb | 9  | 74140456  | 45.9421654  | 15 | -2166.549455 |        |                      |                                                                                                           |
| 299 | Chlb | 9  | 85978653  | 46.6412055  | 5  | -0.164686897 | Inside | '19.21'              | grmzm2g101<br>004_t01<br>'tetrapyrrole<br>synthesis.heme<br>oxygenase'                                    |
| 300 | Chlb | 9  | 147213879 | 101.7957515 | 8  | -0.318295344 |        |                      |                                                                                                           |
| 301 | Chlb | 10 | 107950213 | 44.02050592 | 22 | -0.311582186 | Inside | '11.1.4'             | grmzm2g099<br>696_t01<br>'lipid metabolism.FA<br>synthesis and FA<br>elongation.ACP oxoacyl<br>reductase' |
| 302 | Chlb | 10 | 118129854 | 47.02366267 | 15 | -0.228236332 |        |                      |                                                                                                           |
| 303 | Chlb | 10 | 119651031 | 47.40080838 | 7  | -0.115286868 |        |                      |                                                                                                           |

|     |      |    |           |             |    |              |        |           |                                                                                                                                                 |
|-----|------|----|-----------|-------------|----|--------------|--------|-----------|-------------------------------------------------------------------------------------------------------------------------------------------------|
| 304 | Chlb | 10 | 129585091 | 52.11332474 | 32 | 0.256285226  |        |           |                                                                                                                                                 |
| 305 | Chlb | 10 | 132147651 | 55.92474833 | 6  | 0.240383766  |        |           |                                                                                                                                                 |
| 306 | Chlb | 10 | 148943495 | 104.5936596 | 7  | -0.338495455 |        |           |                                                                                                                                                 |
| 307 | Chlb | 10 | 149647673 | 108.5410404 | 6  | -0.456258788 |        |           |                                                                                                                                                 |
| 308 | Fruc | 1  | 16386798  | 32.84963222 | 6  | -0.013777599 |        |           |                                                                                                                                                 |
| 309 | Fruc | 1  | 16770481  | 33.28017346 | 30 | -0.015750944 |        |           |                                                                                                                                                 |
| 310 | Fruc | 1  | 16775647  | 33.28405569 | 10 | -0.018370011 | Inside | '11.1.10' | grmzm2g445<br>602_t01<br>'lipid metabolism.FA<br>synthesis and FA<br>elongation.beta ketoacyl<br>CoA synthase'                                  |
| 311 | Fruc | 1  | 17461111  | 33.79917927 | 6  | -0.014967229 | Inside | '27.3.3'  | ac206951.3_f<br>gt017<br>'RNA.regulation of<br>transcription.AP2/EREB<br>P, APETALA2/Ethylene-<br>responsive element<br>binding protein family' |
| 312 | Fruc | 1  | 35272897  | 54.48195467 | 5  | -0.029642508 |        |           |                                                                                                                                                 |
| 313 | Fruc | 1  | 44348772  | 60.58908186 | 7  | 0.029290518  |        |           |                                                                                                                                                 |
| 314 | Fruc | 1  | 45121654  | 61.22096078 | 8  | 0.015684896  | Inside | '16.8.1'  | ac212219.3_f<br>gt005<br>'secondary<br>metabolism.flavonoids.a<br>nthocyanins'                                                                  |
| 315 | Fruc | 1  | 45567426  | 61.52614689 | 14 | 0.019975229  |        |           |                                                                                                                                                 |
| 316 | Fruc | 1  | 46712396  | 62.60179969 | 5  | 0.013786727  | Inside | '31.1'    | grmzm2g104<br>534_t01<br>'cell.organisation'                                                                                                    |
| 317 | Fruc | 1  | 57438776  | 70.59917107 | 14 | 0.013567425  | Inside | '33.99'   | grmzm2g073<br>755_t02<br>'development.unspecifie<br>d'                                                                                          |
| 318 | Fruc | 1  | 95550141  | 86.84633266 | 14 | 0.034688611  |        |           |                                                                                                                                                 |
| 319 | Fruc | 2  | 3327524   | 8.176087352 | 9  | -0.011446215 |        |           |                                                                                                                                                 |
| 320 | Fruc | 2  | 3529245   | 9.556599097 | 7  | -0.011598842 | Inside | '25.7'    | grmzm2g062<br>420_t01<br>'C1-metabolism.GTP<br>cyclohydrolase I'                                                                                |
| 321 | Fruc | 2  | 3534327   | 9.591591385 | 10 | -0.012952906 | Inside | '25.7'    | grmzm2g062<br>420_t01<br>'C1-metabolism.GTP<br>cyclohydrolase I'                                                                                |
| 322 | Fruc | 2  | 3794582   | 10.51648703 | 20 | -0.013392911 |        |           |                                                                                                                                                 |

|          |   |           |             |    |              |        |                 |                                                                                                                          |
|----------|---|-----------|-------------|----|--------------|--------|-----------------|--------------------------------------------------------------------------------------------------------------------------|
| 323 Fruc | 2 | 4042572   | 11.15390606 | 18 | -0.012020005 |        |                 |                                                                                                                          |
| 324 Fruc | 2 | 4663012   | 13.34691454 | 5  | -0.011982641 | Inside | '29.4.1.5<br>7' | grmzm2g086<br>577_t03<br>'protein.postranslational<br>modification.kinase.rece<br>ptor like cytoplasmatic<br>kinase VII' |
| 325 Fruc | 2 | 34001062  | 63.56397414 | 5  | -0.011897479 | Inside | '20.1'          | grmzm2g051<br>943_t01<br>'stress.biotic'                                                                                 |
| 326 Fruc | 2 | 177151781 | 87.86279241 | 10 | 0.034341476  |        |                 |                                                                                                                          |
| 327 Fruc | 2 | 177266143 | 87.95845923 | 6  | 0.046944656  | Inside | '1.1.6'         | grmzm2g176<br>129_t01<br>'PS.lightreaction.NADH<br>DH'                                                                   |
| 328 Fruc | 2 | 181271307 | 91.1333845  | 7  | 0.046476341  | Inside | '5.1'           | grmzm2g130<br>440_t01<br>'fermentation.LDH'                                                                              |
| 329 Fruc | 3 | 3386685   | 11.10786166 | 29 | -0.021944149 | Inside | '26.28'         | grmzm2g400<br>929_t01<br>'misc.GDSL-motif lipase'                                                                        |
| 330 Fruc | 3 | 3903533   | 13.78234035 | 18 | -0.016091322 |        |                 |                                                                                                                          |
| 331 Fruc | 3 | 4856540   | 18.3470876  | 47 | -0.014548164 |        |                 |                                                                                                                          |
| 332 Fruc | 3 | 49918968  | 56.54435347 | 26 | -0.016411713 |        |                 |                                                                                                                          |
| 333 Fruc | 3 | 171723196 | 82.25684086 | 47 | 0.040642762  |        |                 |                                                                                                                          |
| 334 Fruc | 3 | 172148591 | 82.5754152  | 7  | 0.064075885  |        |                 |                                                                                                                          |
| 335 Fruc | 3 | 173110658 | 83.38629476 | 18 | 0.042818427  |        |                 |                                                                                                                          |
| 336 Fruc | 3 | 173219900 | 83.47836954 | 11 | 0.066010087  |        |                 |                                                                                                                          |
| 337 Fruc | 3 | 195593529 | 103.3189453 | 7  | 0.02012706   | Inside | '26.17'         | grmzm2g010<br>306_t01<br>'misc.dynamain'                                                                                 |
| 338 Fruc | 3 | 196183579 | 103.6950757 | 5  | 0.011501099  |        |                 |                                                                                                                          |
| 339 Fruc | 3 | 219127882 | 135.874024  | 20 | -0.018693012 |        |                 |                                                                                                                          |
| 340 Fruc | 3 | 221010928 | 139.3762734 | 18 | -0.017339804 |        |                 |                                                                                                                          |
| 341 Fruc | 4 | 596627    | 2.14232426  | 45 | 0.025189271  |        |                 |                                                                                                                          |
| 342 Fruc | 4 | 101026208 | 57.83942086 | 5  | -0.028462957 |        |                 |                                                                                                                          |

|          |   |           |             |    |              |        |           |                                      |
|----------|---|-----------|-------------|----|--------------|--------|-----------|--------------------------------------|
| 343 Fruc | 4 | 109554972 | 58.01578487 | 6  | -0.014600631 |        |           |                                      |
| 344 Fruc | 4 | 118225032 | 58.20188033 | 8  | -0.015380681 |        |           |                                      |
| 345 Fruc | 4 | 121592260 | 58.27415502 | 6  | -0.012488902 |        |           |                                      |
| 346 Fruc | 4 | 121913511 | 58.2810504  | 6  | -0.014513129 |        |           |                                      |
| 347 Fruc | 4 | 122028538 | 58.28351935 | 8  | -0.012822806 |        |           |                                      |
| 348 Fruc | 4 | 125159697 | 58.42149244 | 5  | -0.016269091 |        |           |                                      |
| 349 Fruc | 4 | 139805548 | 59.87084184 | 6  | -0.013396769 |        |           |                                      |
| 350 Fruc | 4 | 144536877 | 60.82876771 | 5  | -0.01193395  |        |           |                                      |
| 351 Fruc | 4 | 170738228 | 78.91944426 | 9  | -0.027117788 |        |           |                                      |
| 352 Fruc | 4 | 172300218 | 81.59892215 | 15 | -0.0185491   |        |           |                                      |
|          |   |           |             |    |              |        |           | 'nucleotide                          |
|          |   |           |             |    |              |        |           | grmzm2g062 metabolism.synthesis.un   |
| 353 Fruc | 4 | 240477479 | 123.4579602 | 5  | -0.05014372  | Inside | '23.1.99' | 716_t01 specified'                   |
| 354 Fruc | 5 | 1571929   | 2.012971503 | 16 | -0.012617453 |        |           |                                      |
|          |   |           |             |    |              |        |           | grmzm2g445                           |
| 355 Fruc | 5 | 2279196   | 4.510973125 | 8  | -0.011842701 | Inside | '10.7'    | 169_t02 'cell wall.modification'     |
|          |   |           |             |    |              |        |           | grmzm2g003                           |
| 356 Fruc | 5 | 2358292   | 5.027739617 | 38 | -0.013396885 | Inside | '34.99'   | 108_t01 'transport.misc'             |
|          |   |           |             |    |              |        |           | grmzm2g002                           |
| 357 Fruc | 5 | 2367917   | 5.090623676 | 8  | -0.012236849 | Inside | '31.1'    | 825_t01 'cell.organisation'          |
| 358 Fruc | 5 | 163819573 | 76.76334725 | 49 | 0.022715483  |        |           |                                      |
| 359 Fruc | 5 | 166171297 | 78.20073394 | 5  | 0.023811543  |        |           |                                      |
| 360 Fruc | 5 | 204526436 | 116.1640652 | 41 | 0.018975985  |        |           |                                      |
|          |   |           |             |    |              |        |           | grmzm2g335 'protein.degradation.aspa |
| 361 Fruc | 5 | 206993797 | 123.8406652 | 29 | 0.022620899  | Inside | '29.5.4'  | 978_t01 rtate protease'              |
| 362 Fruc | 5 | 210780527 | 134.226701  | 7  | 0.0157951    |        |           |                                      |
| 363 Fruc | 5 | 214945363 | 152.2635928 | 8  | 0.024738523  |        |           |                                      |
| 364 Fruc | 6 | 83413352  | 12.31842953 | 47 | -0.016984936 |        |           |                                      |



|          |   |           |              |    |              |        |                                 |                                                                                     |
|----------|---|-----------|--------------|----|--------------|--------|---------------------------------|-------------------------------------------------------------------------------------|
| 365 Fruc | 6 | 93728026  | 20.25312295  | 19 | -0.018294395 | Inside | grmzm2g161<br>'27.3.24' 666_t01 | 'RNA.regulation of transcription.MADS box transcription factor family'              |
| 366 Fruc | 6 | 117587976 | 42.56198959  | 5  | -0.03397919  | Inside | grmzm2g168<br>'11.1.10' 304_t01 | 'lipid metabolism.FA synthesis and FA elongation.beta ketoacyl CoA synthase'        |
| 367 Fruc | 6 | 119772986 | 44.24786955  | 23 | -0.033796984 |        |                                 |                                                                                     |
| 368 Fruc | 6 | 124203584 | 45.80014821  | 9  | -0.025280441 |        |                                 |                                                                                     |
| 369 Fruc | 6 | 128598095 | 47.52042761  | 5  | -0.033664993 |        |                                 |                                                                                     |
| 370 Fruc | 6 | 165119716 | 101.3985908  | 6  | 0.036582506  | Inside | grmzm2g366<br>'27.3.32' 795_t01 | 'RNA.regulation of transcription.WRKY domain transcription factor family'           |
| 371 Fruc | 6 | 166794282 | 106.9690738  | 8  | -0.011678556 |        |                                 |                                                                                     |
| 372 Fruc | 6 | 166794417 | 106.9695432  | 5  | -0.01610415  |        |                                 |                                                                                     |
| 373 Fruc | 7 | 6022883   | 26.56544125  | 7  | -0.013079036 |        |                                 |                                                                                     |
| 374 Fruc | 7 | 9213492   | 33.2209742   | 16 | -0.018141284 | Inside | grmzm2g153<br>'27.3.17' 754_t01 | 'RNA.regulation of transcription.CPP(Zn),C PP1-related transcription factor family' |
| 375 Fruc | 7 | 20233795  | 44.69829015  | 10 | -0.017981407 |        |                                 |                                                                                     |
| 376 Fruc | 7 | 21622999  | 45.56317348  | 15 | -0.018042126 | Inside | ac205008.4_f<br>'34.12' gt002   | 'transport.metal'                                                                   |
| 377 Fruc | 7 | 32630669  | 47.75472755  | 8  | -0.017704491 |        |                                 |                                                                                     |
| 378 Fruc | 7 | 84574592  | 49.92029539  | 9  | -0.01885016  |        |                                 |                                                                                     |
| 379 Fruc | 7 | 86294238  | 49.99529999  | 25 | -0.016277961 |        |                                 |                                                                                     |
| 380 Fruc | 7 | 86760483  | 50.01070124  | 5  | -0.018393153 |        |                                 |                                                                                     |
| 381 Fruc | 7 | 95364029  | 50.42762301  | 14 | -0.019020479 |        |                                 |                                                                                     |
| 382 Fruc | 7 | 109178008 | 55.19093714  | 5  | -0.016770261 |        |                                 |                                                                                     |
| 383 Fruc | 7 | 156688517 | 99.54262593  | 5  | 0.025852571  |        |                                 |                                                                                     |
| 384 Fruc | 9 | 2701441   | -3.388186607 | 10 | -0.03407797  | Inside | grmzm2g026<br>'27.3.20' 833_t02 | 'RNA.regulation of transcription.G2-like transcription factor family, GARP'         |

|          |    |           |             |    |              |        |           |                       |                                                                             |
|----------|----|-----------|-------------|----|--------------|--------|-----------|-----------------------|-----------------------------------------------------------------------------|
| 385 Fruc | 9  | 5619750   | 4.494331447 | 5  | -0.026190353 | Inside | '3.2.2'   | grmzm2g080<br>354_t01 | 'minor CHO<br>metabolism.trehalose.TP<br>P'                                 |
| 386 Fruc | 9  | 9558874   | 14.08293641 | 31 | -0.038288541 |        |           |                       |                                                                             |
| 387 Fruc | 9  | 10186494  | 15.44407336 | 7  | -0.018017282 |        |           |                       |                                                                             |
| 388 Fruc | 9  | 21993322  | 38.82079896 | 27 | -0.037006124 | Inside | '29.5.5'  | grmzm2g148<br>106_t02 | 'protein.degradation.seri<br>ne protease'                                   |
| 389 Fruc | 9  | 142204786 | 87.72532368 | 30 | -0.022131324 |        |           |                       |                                                                             |
| 390 Fruc | 9  | 143828279 | 91.48003191 | 5  | -0.020830478 |        |           |                       |                                                                             |
| 391 Fruc | 9  | 145268207 | 95.10905936 | 8  | -0.014832567 |        |           |                       |                                                                             |
| 392 Fruc | 10 | 5058530   | 14.79019912 | 28 | -0.045641719 | Inside | '27.3.35' | grmzm2g366<br>264_t01 | 'RNA.regulation of<br>transcription.bZIP<br>transcription factor<br>family' |
| 393 Fruc | 10 | 5258877   | 16.0525304  | 31 | -0.045423584 | Inside | '28.1'    | grmzm2g113<br>228_t01 | 'DNA.synthesis/chromati<br>n structure'                                     |
| 394 Fruc | 10 | 5571203   | 17.95328644 | 17 | -0.045237542 |        |           |                       |                                                                             |
| 395 Fruc | 10 | 11480453  | 29.34116571 | 8  | -0.038039626 |        |           |                       |                                                                             |
| 396 Fruc | 10 | 134630447 | 59.4071156  | 7  | -0.017295414 |        |           |                       |                                                                             |
| 397 Fuma | 1  | 195285519 | 108.2877857 | 22 | 0.010497833  |        |           |                       |                                                                             |
| 398 Fuma | 1  | 195634638 | 108.6089505 | 6  | 0.010552372  |        |           |                       |                                                                             |
| 399 Fuma | 1  | 196048817 | 109.0223788 | 6  | 0.007421199  |        |           |                       |                                                                             |
| 400 Fuma | 1  | 205544235 | 117.795721  | 14 | -0.006686224 |        |           |                       |                                                                             |
| 401 Fuma | 1  | 205766088 | 118.0094361 | 13 | -0.004995746 |        |           |                       |                                                                             |
| 402 Fuma | 1  | 206425614 | 118.6447696 | 17 | -0.005436419 |        |           |                       |                                                                             |
| 403 Fuma | 1  | 207121477 | 119.3151072 | 6  | -0.00753724  |        |           |                       |                                                                             |
| 404 Fuma | 1  | 208533778 | 120.6233059 | 7  | -0.007359341 |        |           |                       |                                                                             |
| 405 Fuma | 1  | 208593470 | 120.672802  | 13 | -0.004806602 |        |           |                       |                                                                             |
| 406 Fuma | 1  | 272244444 | 164.542002  | 10 | 0.003610726  |        |           |                       |                                                                             |
| 407 Fuma | 1  | 272244581 | 164.5421084 | 19 | 0.003781599  |        |           |                       |                                                                             |
| 408 Fuma | 1  | 289899574 | 186.9723092 | 6  | 0.002963805  |        |           |                       |                                                                             |
| 409 Fuma | 2  | 5934701   | 18.32576495 | 5  | 0.014046764  |        |           |                       |                                                                             |
| 410 Fuma | 2  | 26788878  | 58.0564637  | 8  | -0.007537765 |        |           |                       |                                                                             |
| 411 Fuma | 2  | 40887517  | 67.93546257 | 5  | -0.004119967 |        |           |                       |                                                                             |
| 412 Fuma | 2  | 101178551 | 76.43228188 | 6  | -0.003508264 |        |           |                       |                                                                             |
| 413 Fuma | 2  | 126037868 | 77.45026254 | 6  | -0.002840198 |        |           |                       |                                                                             |
| 414 Fuma | 2  | 126357762 | 77.49091538 | 7  | -0.003825335 |        |           |                       |                                                                             |

|          |   |           |             |    |              |        |                                                                               |
|----------|---|-----------|-------------|----|--------------|--------|-------------------------------------------------------------------------------|
| 415 Fuma | 2 | 128572754 | 77.77240149 | 5  | 0.006664527  |        |                                                                               |
| 416 Fuma | 2 | 140085774 | 79.23550166 | 9  | -0.003129574 |        |                                                                               |
| 417 Fuma | 2 | 209368892 | 120.1686122 | 5  | -0.003179256 |        |                                                                               |
| 418 Fuma | 2 | 210076932 | 121.1450848 | 6  | -0.005447489 |        |                                                                               |
| 419 Fuma | 3 | 27871359  | 53.36404037 | 8  | -0.003866516 | Inside | '29.5.11. ac183315.4_f 'protein.degradation.ubiq<br>4.2' gt006 uitin.E3.RING' |
| 420 Fuma | 3 | 223869464 | 146.0056611 | 18 | 0.010366321  |        |                                                                               |
| 421 Fuma | 3 | 223869468 | 146.0056712 | 5  | 0.01094552   |        |                                                                               |
| 422 Fuma | 4 | 3544388   | 12.18913098 | 8  | -0.013932612 |        |                                                                               |
| 423 Fuma | 4 | 4653906   | 15.97068346 | 12 | -0.008852558 |        |                                                                               |
| 424 Fuma | 4 | 4655407   | 15.97579929 | 7  | -0.008673224 |        |                                                                               |
| 425 Fuma | 4 | 168642940 | 76.90973825 | 5  | -0.005552603 |        |                                                                               |
| 426 Fuma | 4 | 177728199 | 89.41877612 | 10 | -0.003560153 |        |                                                                               |
| 427 Fuma | 4 | 177733636 | 89.446853   | 10 | -0.002949415 |        |                                                                               |
| 428 Fuma | 4 | 179860377 | 92.79034271 | 8  | -0.003276803 |        |                                                                               |
| 429 Fuma | 4 | 180517470 | 93.4957277  | 5  | -0.002716131 |        |                                                                               |
| 430 Fuma | 4 | 182201693 | 95.89453425 | 8  | -0.004834603 |        |                                                                               |
| 431 Fuma | 4 | 182528229 | 96.35961321 | 8  | -0.003345301 |        |                                                                               |
| 432 Fuma | 4 | 182976299 | 96.99779073 | 7  | -0.002979929 |        |                                                                               |
| 433 Fuma | 4 | 230346458 | 113.6832878 | 23 | 0.006178358  |        |                                                                               |
| 434 Fuma | 4 | 234235715 | 115.012717  | 20 | 0.005063297  |        |                                                                               |
| 435 Fuma | 4 | 244607562 | 137.8307023 | 33 | -0.006210745 | Inside | grmzm2g324<br>'20.2.1' 956_t01 'stress.abiotic.heat'                          |
| 436 Fuma | 5 | 6670422   | 24.85176321 | 8  | 0.008168665  |        |                                                                               |
| 437 Fuma | 5 | 6828578   | 25.41836288 | 5  | 0.002267897  |        |                                                                               |
| 438 Fuma | 5 | 7550141   | 28.65678582 | 8  | 0.004885718  |        |                                                                               |
| 439 Fuma | 5 | 9280217   | 30.80111555 | 6  | 0.003874816  |        |                                                                               |
| 440 Fuma | 5 | 10073594  | 32.64114173 | 7  | 0.003647227  |        |                                                                               |
| 441 Fuma | 5 | 10073765  | 32.64153832 | 28 | 0.003494537  |        |                                                                               |
| 442 Fuma | 5 | 10085671  | 32.66915111 | 5  | 0.00489814   |        |                                                                               |
| 443 Fuma | 6 | 165445511 | 102.4790375 | 8  | -0.005808279 |        |                                                                               |
| 444 Fuma | 7 | 57117438  | 49.15463724 | 6  | -0.006367934 |        |                                                                               |
| 445 Fuma | 7 | 129970942 | 70.62091409 | 6  | -0.005265067 |        |                                                                               |
| 446 Fuma | 7 | 159657824 | 105.8008762 | 37 | 0.003170054  |        |                                                                               |
| 447 Fuma | 7 | 162478003 | 113.1505321 | 5  | 0.004030903  |        |                                                                               |
| 448 Fuma | 7 | 162478193 | 113.1514273 | 13 | 0.004228173  |        |                                                                               |
| 449 Fuma | 7 | 162482540 | 113.1719093 | 13 | 0.003306758  |        |                                                                               |

|     |      |    |           |             |    |              |        |           |                       |                                                                             |
|-----|------|----|-----------|-------------|----|--------------|--------|-----------|-----------------------|-----------------------------------------------------------------------------|
| 450 | Fuma | 8  | 156139987 | 82.72693349 | 6  | -0.00298176  | Inside | '26.16'   | grmzm2g059<br>299_t01 | 'misc.myrosinases-lectin-<br>jacalin'                                       |
| 451 | Fuma | 8  | 160438189 | 89.3463314  | 64 | 0.003362949  |        |           |                       |                                                                             |
| 452 | Fuma | 8  | 160597062 | 89.61860448 | 5  | 0.004068163  |        |           |                       |                                                                             |
| 453 | Fuma | 8  | 160929154 | 90.26562868 | 10 | 0.003237693  |        |           |                       |                                                                             |
| 454 | Fuma | 10 | 89924492  | 41.55012521 | 6  | 0.006236087  |        |           |                       |                                                                             |
| 455 | Fuma | 10 | 148039817 | 99.52795003 | 15 | 0.003588536  |        |           |                       |                                                                             |
| 456 | Fuma | 10 | 148043393 | 99.54799587 | 25 | 0.004260238  |        |           |                       |                                                                             |
| 457 | Gluc | 1  | 19427291  | 35.91876596 | 7  | -0.027454867 |        |           |                       |                                                                             |
| 458 | Gluc | 1  | 19427753  | 35.91919409 | 22 | -0.037111842 |        |           |                       |                                                                             |
| 459 | Gluc | 1  | 19745377  | 36.21353287 | 15 | -0.032734262 | Inside | '27.3.39' | grmzm2g447<br>551_t01 | 'RNA.regulation of<br>transcription.AtSR<br>Transcription Factor<br>family' |
| 460 | Gluc | 1  | 19745402  | 36.21355604 | 13 | -0.045012011 | Inside | '27.3.39' | grmzm2g447<br>551_t01 | 'RNA.regulation of<br>transcription.AtSR<br>Transcription Factor<br>family' |
| 461 | Gluc | 1  | 45048717  | 61.17102638 | 9  | 0.038550257  |        |           |                       |                                                                             |
| 462 | Gluc | 1  | 48047150  | 63.48200445 | 8  | 0.034229401  |        |           |                       |                                                                             |
| 463 | Gluc | 1  | 51070607  | 65.47738632 | 7  | 0.029008336  |        |           |                       |                                                                             |
| 464 | Gluc | 1  | 56261977  | 69.68972945 | 5  | 0.023260105  | Inside | '33.1'    | grmzm2g054<br>916_t01 | 'development.storage<br>proteins'                                           |
| 465 | Gluc | 1  | 155941648 | 90.6953495  | 7  | 0.038011307  |        |           |                       |                                                                             |
| 466 | Gluc | 1  | 219996077 | 128.8274919 | 14 | 0.047101374  |        |           |                       |                                                                             |
| 467 | Gluc | 1  | 222371522 | 129.7775422 | 6  | 0.060501845  |        |           |                       |                                                                             |
| 468 | Gluc | 1  | 239603760 | 141.3379825 | 11 | -0.05994586  |        |           |                       |                                                                             |
| 469 | Gluc | 2  | 3583432   | 9.929705575 | 9  | -0.023800048 |        |           |                       |                                                                             |
| 470 | Gluc | 2  | 3583516   | 9.930283959 | 21 | -0.023735882 |        |           |                       |                                                                             |
| 471 | Gluc | 2  | 3980052   | 10.9932083  | 9  | -0.020514387 |        |           |                       |                                                                             |
| 472 | Gluc | 2  | 4089979   | 11.27575825 | 6  | -0.027570085 |        |           |                       |                                                                             |
| 473 | Gluc | 2  | 4154747   | 11.44223414 | 8  | -0.02251602  |        |           |                       |                                                                             |
| 474 | Gluc | 2  | 5500383   | 16.53049076 | 8  | -0.031577515 |        |           |                       |                                                                             |
| 475 | Gluc | 2  | 21516360  | 52.5167576  | 7  | -0.044827778 |        |           |                       |                                                                             |
| 476 | Gluc | 2  | 21991139  | 53.30019341 | 33 | -0.044813254 |        |           |                       |                                                                             |
| 477 | Gluc | 2  | 21995485  | 53.30230537 | 23 | -0.037693821 |        |           |                       |                                                                             |
| 478 | Gluc | 2  | 21996541  | 53.30281854 | 21 | -0.033790264 |        |           |                       |                                                                             |
| 479 | Gluc | 2  | 61159379  | 74.01441319 | 8  | -0.032013585 |        |           |                       |                                                                             |
| 480 | Gluc | 2  | 160568992 | 82.32572371 | 9  | -0.041399233 |        |           |                       |                                                                             |

|     |      |   |           |             |    |              |        |           |                       |                                                                                     |
|-----|------|---|-----------|-------------|----|--------------|--------|-----------|-----------------------|-------------------------------------------------------------------------------------|
| 481 | Gluc | 2 | 175895506 | 86.83396756 | 12 | 0.048831829  | Inside | '10.6.1'  | grmzm2g703<br>265_t01 | 'cell<br>wall.degradation.cellulas<br>es and beta -1,4-<br>glucanases'              |
| 482 | Gluc | 2 | 186768867 | 98.0043879  | 8  | -0.035176619 |        |           |                       |                                                                                     |
| 483 | Gluc | 2 | 188188473 | 99.75988308 | 11 | -0.03166046  |        |           |                       |                                                                                     |
| 484 | Gluc | 3 | 1878568   | 3.303968086 | 7  | -0.028976818 |        |           |                       |                                                                                     |
| 485 | Gluc | 3 | 1878573   | 3.303993959 | 5  | -0.031384063 |        |           |                       |                                                                                     |
| 486 | Gluc | 3 | 1878755   | 3.304935735 | 5  | -0.021125504 |        |           |                       |                                                                                     |
| 487 | Gluc | 3 | 4677417   | 17.51176627 | 6  | -0.021815356 |        |           |                       |                                                                                     |
| 488 | Gluc | 3 | 10108659  | 34.7208259  | 23 | -0.027274921 |        |           |                       |                                                                                     |
| 489 | Gluc | 3 | 10750452  | 36.00654788 | 19 | -0.029665146 | Inside | '34.18'   | grmzm2g051<br>753_t01 | 'transport.unspecified<br>anions'                                                   |
| 490 | Gluc | 3 | 13310374  | 40.12977866 | 10 | -0.029446598 |        |           |                       |                                                                                     |
| 491 | Gluc | 3 | 13634107  | 40.54837757 | 8  | -0.028513384 |        |           |                       |                                                                                     |
| 492 | Gluc | 3 | 16806728  | 44.65069551 | 9  | -0.029377307 |        |           |                       |                                                                                     |
| 493 | Gluc | 3 | 19194362  | 47.73799582 | 8  | -0.033080281 |        |           |                       |                                                                                     |
| 494 | Gluc | 3 | 49808116  | 56.5306869  | 16 | -0.031996718 |        |           |                       |                                                                                     |
| 495 | Gluc | 3 | 67958527  | 58.10223721 | 5  | -0.033220713 |        |           |                       |                                                                                     |
| 496 | Gluc | 3 | 84984528  | 58.15869307 | 19 | -0.053941727 |        |           |                       |                                                                                     |
| 497 | Gluc | 3 | 126612628 | 60.92265927 | 13 | -0.036596401 |        |           |                       |                                                                                     |
| 498 | Gluc | 3 | 135511148 | 62.83074525 | 10 | -0.032809231 |        |           |                       |                                                                                     |
| 499 | Gluc | 3 | 213286642 | 125.2764546 | 22 | 0.027989477  | Inside | '27.3.22' | grmzm2g126<br>239_t01 | 'RNA.regulation of<br>transcription.HB,Homeo<br>box transcription factor<br>family' |
| 500 | Gluc | 3 | 223962036 | 146.2391988 | 22 | 0.049820979  | Inside | '21.1'    | grmzm2g093<br>436_t01 | 'redox.thioredoxin'                                                                 |
| 501 | Gluc | 4 | 82547651  | 56.71433525 | 9  | -0.032568459 |        |           |                       |                                                                                     |
| 502 | Gluc | 4 | 93788979  | 57.69805012 | 9  | -0.054449121 |        |           |                       |                                                                                     |
| 503 | Gluc | 4 | 94875017  | 57.72053661 | 9  | -0.046879342 |        |           |                       |                                                                                     |
| 504 | Gluc | 4 | 103678485 | 57.89068149 | 10 | -0.02674891  |        |           |                       |                                                                                     |
| 505 | Gluc | 4 | 110571777 | 58.03760973 | 7  | -0.026815621 |        |           |                       |                                                                                     |
| 506 | Gluc | 4 | 142457660 | 60.337891   | 31 | -0.04524174  |        |           |                       |                                                                                     |

|     |      |   |           |             |    |              |        |                 |                       |                                                                                                 |
|-----|------|---|-----------|-------------|----|--------------|--------|-----------------|-----------------------|-------------------------------------------------------------------------------------------------|
| 507 | Gluc | 4 | 243115508 | 132.4118713 | 10 | -0.035189308 | Inside | '27.3.22'       | grmzm2g166<br>041_t01 | 'RNA.regulation of<br>transcription.HB,Homeo<br>box transcription factor<br>family'             |
| 508 | Gluc | 4 | 243119871 | 132.428798  | 9  | -0.053005896 |        |                 |                       |                                                                                                 |
| 509 | Gluc | 5 | 1571929   | 2.012971503 | 64 | -0.030891034 |        |                 |                       |                                                                                                 |
| 510 | Gluc | 5 | 2357601   | 5.023225032 | 15 | -0.03524917  | Inside | '34.99'         | grmzm2g003<br>108_t01 | 'transport.misc'                                                                                |
| 511 | Gluc | 5 | 2358292   | 5.027739617 | 11 | -0.034233745 | Inside | '34.99'         | grmzm2g003<br>108_t01 | 'transport.misc'                                                                                |
| 512 | Gluc | 5 | 7584397   | 28.79525161 | 9  | 0.05608891   |        |                 |                       |                                                                                                 |
| 513 | Gluc | 5 | 7815403   | 29.72899837 | 23 | 0.066760523  |        |                 |                       |                                                                                                 |
| 514 | Gluc | 5 | 10372835  | 33.33515135 | 6  | 0.037017755  | Inside | '29.4.1.5<br>7' | grmzm2g158<br>359_t01 | 'protein.postranslational<br>modification.kinase.rece<br>ptor like cytoplasmatic<br>kinase VII' |
| 515 | Gluc | 5 | 10642005  | 33.95941932 | 32 | 0.047231589  |        |                 |                       |                                                                                                 |
| 516 | Gluc | 5 | 11555355  | 36.07769085 | 9  | 0.04595894   |        |                 |                       |                                                                                                 |
| 517 | Gluc | 5 | 15080589  | 45.43333631 | 7  | -0.041567563 | Inside | '27.3.37'       | grmzm2g079<br>185_t01 | 'RNA.regulation of<br>transcription.AS2,Lateral<br>Organ Boundaries Gene<br>Family'             |
| 518 | Gluc | 5 | 15334088  | 45.78544974 | 26 | -0.0335316   |        |                 |                       |                                                                                                 |
| 519 | Gluc | 5 | 23315145  | 53.64866829 | 8  | -0.048304577 |        |                 |                       |                                                                                                 |
| 520 | Gluc | 5 | 36811132  | 58.27317542 | 5  | -0.030458025 |        |                 |                       |                                                                                                 |
| 521 | Gluc | 5 | 36811154  | 58.27317812 | 24 | -0.030783704 |        |                 |                       |                                                                                                 |
| 522 | Gluc | 5 | 37443804  | 58.32813065 | 7  | -0.027227488 |        |                 |                       |                                                                                                 |
| 523 | Gluc | 5 | 38114919  | 58.37370611 | 5  | -0.032853631 | Inside | '17.4.2'        | grmzm2g158<br>252_t01 | 'hormone<br>metabolism.cytokinin.sig<br>nal transduction'                                       |
| 524 | Gluc | 5 | 88070567  | 69.41851202 | 9  | -0.048661521 |        |                 |                       |                                                                                                 |
| 525 | Gluc | 5 | 114204945 | 70.51015923 | 15 | -0.037585673 |        |                 |                       |                                                                                                 |
| 526 | Gluc | 5 | 149251475 | 73.13980408 | 9  | -0.039233421 |        |                 |                       |                                                                                                 |
| 527 | Gluc | 5 | 163819573 | 76.76334725 | 6  | 0.03892669   |        |                 |                       |                                                                                                 |

|     |      |   |           |              |    |              |        |               |                                                                              |
|-----|------|---|-----------|--------------|----|--------------|--------|---------------|------------------------------------------------------------------------------|
| 528 | Gluc | 5 | 165729383 | 77.90457087  | 6  | -0.068401599 |        |               |                                                                              |
| 529 | Gluc | 5 | 167871133 | 79.69575659  | 8  | -0.063461483 | Inside | '28.1'        | grmzm2g045 'DNA.synthesis/chromatin structure'                               |
| 530 | Gluc | 5 | 168259864 | 79.99109637  | 14 | -0.054728927 |        |               |                                                                              |
| 531 | Gluc | 5 | 168260887 | 79.99218626  | 6  | -0.044931698 |        |               |                                                                              |
| 532 | Gluc | 5 | 192568110 | 101.6096752  | 10 | 0.062349209  |        |               |                                                                              |
| 533 | Gluc | 5 | 200083354 | 107.7054585  | 5  | -0.035928509 |        |               |                                                                              |
| 534 | Gluc | 5 | 200531277 | 108.3769927  | 13 | 0.049459237  | Inside | '27.3.8'      | grmzm2g140 'RNA.regulation of transcription.C2C2(Zn) DOF zinc finger family' |
| 535 | Gluc | 5 | 201231896 | 109.0981131  | 11 | -0.04069251  | Inside | '20.2.1'      | grmzm2g481 'stress.abiotic.heat'                                             |
| 536 | Gluc | 5 | 209935600 | 130.9474516  | 5  | 0.054968328  |        |               |                                                                              |
| 537 | Gluc | 5 | 212261524 | 139.7573696  | 29 | 0.03161962   | Inside | '3.2.3'       | grmzm2g122 'minor CHO metabolism.trehalose.potential TPS/TPP'                |
| 538 | Gluc | 5 | 213298320 | 144.5886587  | 7  | 0.03745947   |        |               |                                                                              |
| 539 | Gluc | 6 | 1331502   | -9.338084147 | 17 | 0.048982117  | Inside | '29.5.11.4.2' | grmzm2g423 'protein.degradation.ubiquitin.E3.RING'                           |
| 540 | Gluc | 6 | 1335665   | -9.333360919 | 20 | 0.044914068  |        |               |                                                                              |
| 541 | Gluc | 6 | 9189279   | -0.422862181 | 10 | 0.0457043    |        |               |                                                                              |
| 542 | Gluc | 6 | 49947554  | 8.548807235  | 13 | 0.050794602  |        |               |                                                                              |
| 543 | Gluc | 6 | 122728773 | 45.27892524  | 28 | -0.090243045 |        |               |                                                                              |
| 544 | Gluc | 6 | 123562319 | 45.55520364  | 14 | -0.085892259 |        |               |                                                                              |
| 545 | Gluc | 6 | 157445216 | 76.89711855  | 5  | -0.059505241 |        |               |                                                                              |
| 546 | Gluc | 6 | 157953572 | 77.68801846  | 6  | -0.050730304 |        |               |                                                                              |
| 547 | Gluc | 7 | 3665692   | 13.3545418   | 11 | -0.043550162 |        |               |                                                                              |
| 548 | Gluc | 7 | 20233795  | 44.69829015  | 5  | -0.032821318 |        |               |                                                                              |
| 549 | Gluc | 7 | 27327128  | 46.7793044   | 15 | -0.031600786 | Inside | '34.13'       | grmzm2g156 'transport.peptides and oligopeptides'                            |
| 550 | Gluc | 7 | 32868948  | 47.79855164  | 40 | -0.03385516  |        |               |                                                                              |
| 551 | Gluc | 7 | 84574592  | 49.92029539  | 16 | -0.03318546  |        |               |                                                                              |
| 552 | Gluc | 7 | 151684587 | 89.72788592  | 23 | 0.050943726  |        |               |                                                                              |
| 553 | Gluc | 7 | 151704874 | 89.76604438  | 13 | 0.063838907  |        |               |                                                                              |
| 554 | Gluc | 7 | 159106172 | 104.5548504  | 6  | -0.033343837 |        |               |                                                                              |
| 555 | Gluc | 7 | 166657242 | 123.8438631  | 13 | 0.046507086  |        |               |                                                                              |





|     |      |    |           |             |    |              |        |          |                       |                                                                                                |
|-----|------|----|-----------|-------------|----|--------------|--------|----------|-----------------------|------------------------------------------------------------------------------------------------|
| 580 | Gluc | 9  | 26517167  | 43.30986818 | 6  | 0.044089609  |        |          |                       |                                                                                                |
| 581 | Gluc | 9  | 26517266  | 43.30992673 | 33 | 0.044430659  |        |          |                       |                                                                                                |
| 582 | Gluc | 9  | 60088439  | 45.65313865 | 30 | 0.055300858  |        |          |                       |                                                                                                |
| 583 | Gluc | 9  | 144805016 | 93.75044572 | 11 | 0.03694982   | Inside | '26.21'  | grmzm2g004<br>466_t01 | 'misc.protease<br>inhibitor/seed<br>storage/lipid transfer<br>protein (LTP) family<br>protein' |
| 584 | Gluc | 10 | 5427445   | 17.07840286 | 48 | -0.069028108 |        |          |                       |                                                                                                |
| 585 | Gluc | 10 | 37230981  | 36.08777546 | 15 | 0.057220632  |        |          |                       |                                                                                                |
| 586 | Gluc | 10 | 52110744  | 36.32411544 | 18 | 0.071276311  |        |          |                       |                                                                                                |
| 587 | Gluc | 10 | 76226092  | 38.27843109 | 8  | 0.042662267  |        |          |                       |                                                                                                |
| 588 | Gluc | 10 | 76332289  | 38.30539729 | 11 | 0.043798998  |        |          |                       |                                                                                                |
| 589 | Gluc | 10 | 85540940  | 40.43084945 | 33 | 0.066852209  |        |          |                       |                                                                                                |
| 590 | Gluc | 10 | 138301683 | 66.29092836 | 9  | -0.037590118 |        |          |                       |                                                                                                |
| 591 | Gluc | 10 | 144247405 | 82.22431479 | 8  | -0.040531525 |        |          |                       |                                                                                                |
| 592 | Gluc | 10 | 148193563 | 100.3897975 | 8  | -0.046829239 |        |          |                       |                                                                                                |
| 593 | Glut | 1  | 52690146  | 67.43745454 | 13 | -0.00764858  |        |          |                       |                                                                                                |
| 594 | Glut | 1  | 182943941 | 98.00929506 | 43 | 0.004651268  |        |          |                       |                                                                                                |
| 595 | Glut | 1  | 182944297 | 98.00949265 | 10 | 0.004698343  |        |          |                       |                                                                                                |
| 596 | Glut | 1  | 183661710 | 98.46017249 | 25 | 0.005469687  |        |          |                       |                                                                                                |
| 597 | Glut | 1  | 219467828 | 128.6162207 | 53 | -0.006511624 |        |          |                       |                                                                                                |
| 598 | Glut | 1  | 220903481 | 129.1904047 | 5  | -0.011601406 |        |          |                       |                                                                                                |
| 599 | Glut | 1  | 221341695 | 129.3656668 | 12 | -0.009264172 | Inside | '27.4'   | grmzm2g411<br>041_t01 | 'RNA.RNA binding'                                                                              |
| 600 | Glut | 1  | 277632495 | 170.2619536 | 14 | 0.010539017  |        |          |                       |                                                                                                |
| 601 | Glut | 2  | 4153357   | 11.43866137 | 14 | 0.008070873  |        |          |                       |                                                                                                |
| 602 | Glut | 2  | 4153720   | 11.4395944  | 56 | 0.009484778  |        |          |                       |                                                                                                |
| 603 | Glut | 2  | 4299868   | 11.96628803 | 12 | 0.003568927  |        |          |                       |                                                                                                |
| 604 | Glut | 2  | 12590485  | 36.29106182 | 5  | -0.008475169 |        |          |                       |                                                                                                |
| 605 | Glut | 2  | 133606697 | 78.41212615 | 8  | -0.005723744 |        |          |                       |                                                                                                |
| 606 | Glut | 2  | 185662626 | 96.4222994  | 8  | 0.005714311  | Inside | '27.3.8' | grmzm2g009<br>406_t01 | 'RNA.regulation of<br>transcription.C2C2(Zn)<br>DOF zinc finger family'                        |
| 607 | Glut | 2  | 186287170 | 97.21489693 | 11 | 0.00486937   |        |          |                       |                                                                                                |
| 608 | Glut | 2  | 186556918 | 97.58848824 | 7  | 0.00560792   |        |          |                       |                                                                                                |
| 609 | Glut | 2  | 186556997 | 97.58864326 | 38 | 0.004943913  |        |          |                       |                                                                                                |
| 610 | Glut | 2  | 186558389 | 97.59137473 | 6  | 0.004850272  |        |          |                       |                                                                                                |
| 611 | Glut | 2  | 186558494 | 97.59158077 | 8  | 0.005489912  |        |          |                       |                                                                                                |
| 612 | Glut | 2  | 209437807 | 120.3370062 | 6  | -0.006286015 |        |          |                       |                                                                                                |
| 613 | Glut | 2  | 210076624 | 121.1447377 | 5  | -0.007333198 |        |          |                       |                                                                                                |

|     |      |   |           |             |    |              |        |           |                                                                                   |
|-----|------|---|-----------|-------------|----|--------------|--------|-----------|-----------------------------------------------------------------------------------|
| 614 | Glut | 2 | 233601849 | 155.7785003 | 5  | -0.004272848 |        |           |                                                                                   |
| 615 | Glut | 3 | 201451737 | 108.647491  | 5  | -0.009148834 |        |           |                                                                                   |
| 616 | Glut | 3 | 209190519 | 119.5728622 | 8  | -0.008009729 | Inside | '21.2'    | grmzm2g024_448_t01 'redox.ascorbate and glutathione'                              |
| 617 | Glut | 3 | 210306116 | 120.8801933 | 6  | -0.016920822 |        |           |                                                                                   |
| 618 | Glut | 3 | 210710907 | 121.3852837 | 8  | -0.017895411 |        |           |                                                                                   |
| 619 | Glut | 3 | 210877159 | 121.5927298 | 12 | -0.004934249 |        |           |                                                                                   |
| 620 | Glut | 3 | 210988072 | 121.7311249 | 6  | -0.016726602 |        |           |                                                                                   |
| 621 | Glut | 3 | 211148597 | 121.9314249 | 16 | -0.005852378 |        |           |                                                                                   |
| 622 | Glut | 3 | 212234516 | 123.2864138 | 7  | -0.005205315 |        |           |                                                                                   |
| 623 | Glut | 3 | 212718903 | 123.8908226 | 5  | -0.004685377 |        |           |                                                                                   |
| 624 | Glut | 3 | 213151216 | 124.9438117 | 7  | -0.004725778 |        |           |                                                                                   |
| 625 | Glut | 3 | 213151324 | 124.944077  | 8  | -0.004513687 |        |           |                                                                                   |
| 626 | Glut | 3 | 213890769 | 126.7603538 | 6  | -0.010464009 | Inside | '1.5.1'   | grmzm2g121_878_t05 'PS.carbon concentrating mechanism.C4'                         |
| 627 | Glut | 3 | 215225785 | 128.93347   | 9  | -0.005251452 |        |           |                                                                                   |
| 628 | Glut | 3 | 225244456 | 148.4971299 | 11 | 0.010839249  | Inside | '27.3.60' | grmzm2g071_322_t01 'RNA.regulation of transcription.NIN-like bZIP-related family' |
| 629 | Glut | 3 | 228108627 | 153.4517969 | 9  | -0.007734346 | Inside | '31.2'    | grmzm2g109_618_t01 'cell.division'                                                |
| 630 | Glut | 4 | 113973202 | 58.11061842 | 7  | 0.012195634  |        |           |                                                                                   |
| 631 | Glut | 4 | 114035361 | 58.11195261 | 27 | 0.009580393  |        |           |                                                                                   |
| 632 | Glut | 4 | 114684938 | 58.12589523 | 19 | 0.012290204  |        |           |                                                                                   |
| 633 | Glut | 4 | 114784127 | 58.12802424 | 11 | 0.008190782  |        |           |                                                                                   |
| 634 | Glut | 4 | 177057914 | 88.36703104 | 8  | -0.004129286 |        |           |                                                                                   |
| 635 | Glut | 4 | 177728199 | 89.41877612 | 7  | -0.004671784 |        |           |                                                                                   |
| 636 | Glut | 4 | 180521118 | 93.50092348 | 6  | -0.003964857 |        |           |                                                                                   |
| 637 | Glut | 4 | 180521269 | 93.50113855 | 12 | -0.003984467 |        |           |                                                                                   |
| 638 | Glut | 5 | 2188871   | 3.920842986 | 34 | 0.004382943  | Inside | '3.5'     | grmzm2g085_320_t01 'minor CHO metabolism.others'                                  |

|     |      |   |           |              |    |              |        |           |                       |                                                                                   |
|-----|------|---|-----------|--------------|----|--------------|--------|-----------|-----------------------|-----------------------------------------------------------------------------------|
| 639 | Glut | 5 | 2188935   | 3.921261124  | 7  | 0.004596176  | Inside | '3.5'     | grmzm2g085<br>320_t01 | 'minor CHO<br>metabolism.others'                                                  |
| 640 | Glut | 5 | 22628584  | 52.93088442  | 10 | 0.004845342  |        |           |                       |                                                                                   |
| 641 | Glut | 5 | 24406989  | 53.96237944  | 33 | 0.005600127  | Inside | '27.3.25' | grmzm2g392<br>823_t01 | 'RNA.regulation of<br>transcription.MYB<br>domain transcription<br>factor family' |
| 642 | Glut | 5 | 26831469  | 54.87846643  | 28 | 0.004300894  |        |           |                       |                                                                                   |
| 643 | Glut | 5 | 26968073  | 54.93008209  | 8  | 0.004561445  |        |           |                       |                                                                                   |
| 644 | Glut | 5 | 204624078 | 116.4807852  | 18 | -0.008453086 |        |           |                       |                                                                                   |
| 645 | Glut | 5 | 207099285 | 124.0780936  | 14 | -0.005034335 |        |           |                       |                                                                                   |
| 646 | Glut | 5 | 207830710 | 126.0436057  | 6  | -0.005515777 |        |           |                       |                                                                                   |
| 647 | Glut | 5 | 208181590 | 126.6094235  | 22 | -0.00481065  |        |           |                       |                                                                                   |
| 648 | Glut | 5 | 211971359 | 138.4052511  | 12 | -0.004321074 |        |           |                       |                                                                                   |
| 649 | Glut | 6 | 5873783   | -4.184534568 | 5  | -0.004487679 |        |           |                       |                                                                                   |
| 650 | Glut | 6 | 12079085  | 2.855833808  | 5  | -0.006531182 | Inside | '29.3.5'  | grmzm2g166<br>537_t01 | 'protein.targeting.peroxis<br>omes'                                               |
| 651 | Glut | 6 | 17417589  | 5.992091218  | 17 | -0.007355935 |        |           |                       |                                                                                   |
| 652 | Glut | 7 | 46996523  | 49.11264731  | 7  | 0.008798227  |        |           |                       |                                                                                   |
| 653 | Glut | 7 | 94886697  | 50.37959201  | 10 | 0.005639153  | Inside | '3.2.2'   | grmzm2g174<br>396_t01 | 'minor CHO<br>metabolism.trehalose.TP<br>P'                                       |
| 654 | Glut | 7 | 142900670 | 81.10277074  | 5  | 0.006182641  | Inside | '10.7'    | grmzm2g413<br>044_t01 | 'cell wall.modification'                                                          |
| 655 | Glut | 7 | 153318373 | 92.800926    | 8  | 0.005690411  |        |           |                       |                                                                                   |
| 656 | Glut | 8 | 6455489   | 18.09391822  | 6  | 0.00847514   |        |           |                       |                                                                                   |
| 657 | Glut | 8 | 6456227   | 18.0946642   | 11 | 0.008664988  |        |           |                       |                                                                                   |
| 658 | Glut | 8 | 7548635   | 19.78341505  | 71 | 0.007377193  |        |           |                       |                                                                                   |
| 659 | Glut | 8 | 101278421 | 58.12094124  | 7  | 0.004952541  | Inside | '26.12'   | grmzm2g117<br>365_t01 | 'misc.peroxidases'                                                                |

|     |      |    |           |             |    |              |        |           |                       |                                                                                      |
|-----|------|----|-----------|-------------|----|--------------|--------|-----------|-----------------------|--------------------------------------------------------------------------------------|
| 660 | Glut | 8  | 103054530 | 58.74182186 | 12 | 0.007297413  | Inside | '26.10'   | grmzm2g096<br>029_t01 | 'misc.cytochrome P450'                                                               |
| 661 | Glut | 8  | 108849125 | 60.58213104 | 58 | 0.007826556  | Inside | '30.5'    | grmzm2g072<br>089_t01 | 'signalling.G-proteins'                                                              |
| 662 | Glut | 8  | 111162784 | 61.25050555 | 6  | 0.005962952  |        |           |                       |                                                                                      |
| 663 | Glut | 9  | 147914070 | 105.0171122 | 7  | -0.005016694 | Inside | '30.2.11' | grmzm2g438<br>840_t01 | 'signalling.receptor<br>kinases.leucine rich<br>repeat XI'                           |
| 664 | Glut | 10 | 4806482   | 13.07619208 | 13 | 0.004785432  |        |           |                       |                                                                                      |
| 665 | Glut | 10 | 4916937   | 13.82732142 | 5  | 0.005675285  | Inside | '27.3.20' | grmzm2g016<br>370_t01 | 'RNA.regulation of<br>transcription.G2-like<br>transcription factor<br>family, GARP' |
| 666 | Glut | 10 | 107945494 | 44.01972245 | 13 | -0.005346414 | Inside | '26.1'    | grmzm2g399<br>530_t01 | 'misc.misc2'                                                                         |
| 667 | Glut | 10 | 121191348 | 47.87413076 | 6  | -0.00534999  |        |           |                       |                                                                                      |
| 668 | Glut | 10 | 143716606 | 81.33488617 | 5  | 0.005311941  |        |           |                       |                                                                                      |
| 669 | Glut | 10 | 143720983 | 81.33864061 | 5  | 0.006129575  | Inside | '30.2.17' | grmzm2g000<br>633_t01 | 'signalling.receptor<br>kinases.DUF 26'                                              |
| 670 | Glut | 10 | 145459551 | 86.83094884 | 6  | 0.00654061   |        |           |                       |                                                                                      |
| 671 | Glut | 10 | 145674099 | 87.6872826  | 53 | 0.005786004  |        |           |                       |                                                                                      |
| 672 | Glut | 10 | 146203278 | 89.79941527 | 6  | 0.005650134  |        |           |                       |                                                                                      |
| 673 | Glut | 10 | 146744765 | 92.26833185 | 7  | 0.004535231  |        |           |                       |                                                                                      |
| 674 | Glut | 10 | 148374079 | 101.4017084 | 12 | 0.006234528  |        |           |                       |                                                                                      |
| 675 | Mala | 1  | 15026222  | 30.17736702 | 5  | -0.00767141  |        |           |                       |                                                                                      |
| 676 | Mala | 1  | 16018451  | 32.20888865 | 5  | -0.010779957 |        |           |                       |                                                                                      |
| 677 | Mala | 1  | 16018768  | 32.20944008 | 34 | -0.010507566 |        |           |                       |                                                                                      |

|          |   |           |             |    |              |
|----------|---|-----------|-------------|----|--------------|
| 678 Mala | 1 | 39323398  | 57.23255596 | 57 | 0.011761998  |
| 679 Mala | 1 | 40056302  | 57.91121791 | 14 | 0.007307404  |
| 680 Mala | 1 | 88319619  | 83.94252884 | 5  | 0.005107759  |
| 681 Mala | 1 | 90444879  | 84.51213232 | 6  | 0.007232955  |
| 682 Mala | 1 | 210010258 | 121.8475905 | 9  | -0.007472494 |
| 683 Mala | 1 | 219597467 | 128.6680693 | 5  | -0.010215717 |
| 684 Mala | 1 | 219599713 | 128.6689676 | 17 | -0.008622717 |
| 685 Mala | 1 | 222370635 | 129.7771875 | 21 | -0.010317833 |
| 686 Mala | 1 | 292093541 | 191.7018819 | 15 | 0.029138599  |
| 687 Mala | 1 | 295777277 | 199.3871057 | 5  | 0.021925596  |
| 688 Mala | 2 | 2111645   | 4.01866061  | 8  | 0.006346054  |
| 689 Mala | 2 | 2662790   | 6.10191746  | 5  | 0.012572964  |
| 690 Mala | 2 | 4313222   | 12.01705821 | 7  | 0.008065261  |
| 691 Mala | 2 | 4829815   | 13.98107797 | 14 | 0.007986073  |
| 692 Mala | 2 | 5064142   | 14.87195891 | 10 | 0.009403602  |
| 693 Mala | 2 | 5064288   | 14.87251398 | 29 | 0.009676366  |

|          |   |           |             |    |              |        |          |            |         |                                                                                                           |
|----------|---|-----------|-------------|----|--------------|--------|----------|------------|---------|-----------------------------------------------------------------------------------------------------------|
| 694 Mala | 2 | 5564443   | 16.77403859 | 17 | 0.007030808  | Inside | '27.3.3' | grmzm2g174 | 917_t01 | 'RNA.regulation of transcription.AP2/EREB P, APETALA2/Ethylene-responsive element binding protein family' |
| 695 Mala | 2 | 38490452  | 66.37064702 | 10 | -0.008181854 |        |          |            |         |                                                                                                           |
| 696 Mala | 2 | 53075256  | 72.33109749 | 67 | -0.01005034  |        |          |            |         |                                                                                                           |
| 697 Mala | 2 | 121233141 | 77.09963877 | 6  | -0.008726546 |        |          |            |         |                                                                                                           |
| 698 Mala | 2 | 187425746 | 99.07896093 | 34 | 0.006597118  |        |          |            |         |                                                                                                           |
| 699 Mala | 2 | 188442924 | 99.98704342 | 26 | 0.010380475  |        |          |            |         |                                                                                                           |

|          |   |           |             |    |             |        |          |            |         |                                                                                                           |
|----------|---|-----------|-------------|----|-------------|--------|----------|------------|---------|-----------------------------------------------------------------------------------------------------------|
| 700 Mala | 2 | 190921710 | 102.1999719 | 13 | 0.007946425 | Inside | '27.3.3' | grmzm2g170 | 253_t01 | 'RNA.regulation of transcription.AP2/EREB P, APETALA2/Ethylene-responsive element binding protein family' |
|----------|---|-----------|-------------|----|-------------|--------|----------|------------|---------|-----------------------------------------------------------------------------------------------------------|

|          |   |           |             |    |              |        |          |            |         |                                                                                                           |
|----------|---|-----------|-------------|----|--------------|--------|----------|------------|---------|-----------------------------------------------------------------------------------------------------------|
| 701 Mala | 2 | 190922255 | 102.2004584 | 6  | 0.005818998  | Inside | '27.3.3' | grmzm2g170 | 253_t01 | 'RNA.regulation of transcription.AP2/EREB P, APETALA2/Ethylene-responsive element binding protein family' |
| 702 Mala | 2 | 208636969 | 118.3801568 | 72 | -0.009940999 |        |          |            |         |                                                                                                           |
| 703 Mala | 3 | 28560505  | 53.70440674 | 76 | 0.012754816  |        |          |            |         |                                                                                                           |
| 704 Mala | 3 | 110591868 | 58.89150506 | 6  | 0.009305688  |        |          |            |         |                                                                                                           |
| 705 Mala | 3 | 197969185 | 105.1512436 | 6  | 0.008872874  |        |          |            |         |                                                                                                           |

|          |   |           |              |    |              |        |           |                                                                       |
|----------|---|-----------|--------------|----|--------------|--------|-----------|-----------------------------------------------------------------------|
| 706 Mala | 3 | 200646842 | 108.1602931  | 7  | 0.006749729  |        |           |                                                                       |
| 707 Mala | 3 | 207468446 | 116.9659734  | 5  | 0.007830782  |        |           |                                                                       |
| 708 Mala | 3 | 208722589 | 119.0297927  | 10 | 0.018556936  |        |           |                                                                       |
| 709 Mala | 3 | 208759190 | 119.072271   | 7  | 0.018809679  |        |           |                                                                       |
| 710 Mala | 3 | 213856232 | 126.6755216  | 29 | -0.008429835 | Inside | '1.5.1'   | grmzm2g348 'PS.carbon concentrating<br>512_t01 mechanism.C4'          |
| 711 Mala | 3 | 214330739 | 127.7703198  | 23 | -0.007870489 |        |           |                                                                       |
| 712 Mala | 3 | 214355739 | 127.8009362  | 14 | -0.007817618 |        |           |                                                                       |
| 713 Mala | 3 | 223533563 | 145.1258349  | 43 | -0.006537456 |        |           |                                                                       |
| 714 Mala | 4 | 170999854 | 79.42178824  | 8  | -0.017758613 |        |           |                                                                       |
| 715 Mala | 4 | 171775102 | 80.83509484  | 83 | -0.010613833 |        |           |                                                                       |
| 716 Mala | 4 | 180344878 | 93.24990822  | 5  | 0.026764303  | Inside | '33.99'   | grmzm2g016 'development.unspecifie<br>948_t01 d'                      |
| 717 Mala | 5 | 2767759   | 7.538649577  | 9  | -0.023022027 |        |           |                                                                       |
| 718 Mala | 5 | 4189784   | 13.29548628  | 8  | -0.024817481 |        |           |                                                                       |
| 719 Mala | 5 | 5266701   | 18.78312331  | 16 | -0.018541237 |        |           |                                                                       |
| 720 Mala | 5 | 25580476  | 54.40578016  | 17 | 0.006381893  |        |           |                                                                       |
| 721 Mala | 5 | 35870702  | 58.15768893  | 9  | 0.007312398  |        |           |                                                                       |
| 722 Mala | 5 | 159516767 | 75.22607915  | 59 | 0.006946802  |        |           |                                                                       |
| 723 Mala | 5 | 196990966 | 105.0448056  | 21 | -0.006739831 |        |           |                                                                       |
| 724 Mala | 5 | 196991427 | 105.0451889  | 6  | -0.007454933 |        |           |                                                                       |
| 725 Mala | 5 | 213281396 | 144.5097958  | 5  | -0.007254868 |        |           |                                                                       |
| 726 Mala | 5 | 214193499 | 148.7600372  | 10 | -0.005516584 | Inside | '27.1.19' | grmzm2g150 'RNA.processing.ribonuc<br>912_t01 leases'                 |
| 727 Mala | 6 | 2173089   | -8.383242223 | 8  | -0.007048492 |        |           |                                                                       |
| 728 Mala | 6 | 3682882   | -6.670271784 | 7  | -0.007945361 | Inside | '26.10'   | grmzm2g104<br>877_t01 'misc.cytochrome P450'                          |
| 729 Mala | 6 | 6894842   | -3.026068551 | 6  | -0.005310972 |        |           |                                                                       |
| 730 Mala | 6 | 9251251   | -0.35255042  | 21 | -0.006131661 | Inside | '33.99'   | grmzm2g442 'development.unspecifie<br>170_t01 d'                      |
| 731 Mala | 6 | 160133599 | 84.08459515  | 7  | -0.010156075 |        |           |                                                                       |
| 732 Mala | 6 | 161832235 | 87.63268966  | 6  | -0.009770832 | Inside | '26.2'    | grmzm2g121 'misc.UDP glucosyl and<br>237_t01 glucoronyl transferases' |
| 733 Mala | 6 | 162218871 | 89.54447098  | 6  | -0.006148267 |        |           |                                                                       |

|          |    |           |              |    |              |        |          |                                                                                              |
|----------|----|-----------|--------------|----|--------------|--------|----------|----------------------------------------------------------------------------------------------|
| 734 Mala | 6  | 162665812 | 91.75443968  | 12 | -0.008612649 |        |          |                                                                                              |
| 735 Mala | 6  | 163284243 | 94.27967325  | 19 | -0.005380966 |        |          |                                                                                              |
| 736 Mala | 6  | 165585617 | 102.9436765  | 17 | -0.006076029 |        |          |                                                                                              |
| 737 Mala | 7  | 118340956 | 59.84562968  | 7  | -0.012097666 |        |          |                                                                                              |
| 738 Mala | 7  | 131033445 | 71.16406426  | 19 | -0.009077321 |        |          |                                                                                              |
| 739 Mala | 7  | 143058340 | 81.14259414  | 5  | -0.006769154 | Inside | '30.5'   | grmzm2g131<br>275_t01 'signalling.G-proteins'                                                |
| 740 Mala | 7  | 145583488 | 83.49098005  | 9  | -0.005789243 | Inside | '26.2'   | grmzm2g455 'misc.UDP glucosyl and<br>075_t01 glucuronyl transferases'                        |
| 741 Mala | 7  | 146746400 | 84.65040768  | 13 | -0.007872159 | Inside | '26.4.1' | grmzm2g325 'misc.beta 1,3 glucan<br>008_t02 hydrolases.glucan endo-<br>1,3-beta-glucosidase' |
| 742 Mala | 7  | 163624094 | 115.764038   | 48 | 0.012940535  | Inside | '30.3'   | grmzm2g015<br>703_t01 'signalling.calcium'                                                   |
| 743 Mala | 7  | 166492884 | 123.1295455  | 11 | 0.009047583  |        |          |                                                                                              |
| 744 Mala | 7  | 166493179 | 123.1308276  | 67 | 0.011080937  |        |          |                                                                                              |
| 745 Mala | 7  | 167073361 | 125.6523612  | 6  | 0.009385491  |        |          |                                                                                              |
| 746 Mala | 7  | 167122054 | 125.8639863  | 17 | 0.012150093  |        |          |                                                                                              |
| 747 Mala | 8  | 100197210 | 57.57868238  | 6  | 0.00790012   |        |          |                                                                                              |
| 748 Mala | 8  | 108849390 | 60.58220759  | 51 | 0.005689455  | Inside | '30.5'   | grmzm2g072<br>089_t01 'signalling.G-proteins'                                                |
| 749 Mala | 8  | 120917873 | 65.51878959  | 5  | 0.008136638  |        |          |                                                                                              |
| 750 Mala | 8  | 154959713 | 81.88784605  | 10 | 0.012371157  |        |          |                                                                                              |
| 751 Mala | 8  | 159784012 | 88.41830479  | 12 | 0.012070302  |        |          |                                                                                              |
| 752 Mala | 9  | 91767617  | 47.59229769  | 5  | 0.009468398  |        |          |                                                                                              |
| 753 Mala | 9  | 109432591 | 53.84671075  | 14 | 0.010241133  |        |          |                                                                                              |
| 754 Mala | 10 | 1210362   | -2.349387514 | 15 | -0.017276952 |        |          |                                                                                              |

|          |    |           |              |    |              |        |                  |                       |                                                                                         |
|----------|----|-----------|--------------|----|--------------|--------|------------------|-----------------------|-----------------------------------------------------------------------------------------|
| 755 Mala | 10 | 1431221   | -1.586267435 | 6  | 0.011410568  | Inside | '26.16'          | grmzm2g104<br>655_t01 | 'misc.myrosinases-lectin-<br>jacalin'                                                   |
| 756 Mala | 10 | 1467050   | -1.462469767 | 16 | 0.006758966  | Inside | '20.1'           | grmzm2g400<br>999_t01 | 'stress.biotic'                                                                         |
| 757 Mala | 10 | 2275477   | 1.330836713  | 6  | 0.006068756  |        |                  |                       |                                                                                         |
| 758 Mala | 10 | 2592048   | 2.424664387  | 5  | 0.008847718  | Inside | '17.3.1.2<br>.3' | grmzm2g068<br>465_t01 | 'hormone<br>metabolism.brassinoster<br>oid.synthesis-<br>degradation.sterols.CYP<br>51' |
| 759 Mala | 10 | 4201480   | 8.961984916  | 5  | 0.006361453  |        |                  |                       |                                                                                         |
| 760 Mala | 10 | 145447601 | 86.78325234  | 17 | 0.007756603  |        |                  |                       |                                                                                         |
| 761 Mala | 10 | 145456506 | 86.81879521  | 5  | 0.008987877  |        |                  |                       |                                                                                         |
| 762 Mala | 10 | 145674099 | 87.6872826   | 67 | 0.007733533  |        |                  |                       |                                                                                         |
| 763 Mala | 10 | 145733506 | 87.92439606  | 8  | 0.009243772  |        |                  |                       |                                                                                         |
| 764 Nitr | 1  | 5563538   | 9.70193737   | 75 | 0.003559647  |        |                  |                       |                                                                                         |
| 765 Nitr | 1  | 51114082  | 65.50613364  | 11 | 0.003292823  |        |                  |                       |                                                                                         |
| 766 Nitr | 1  | 60210415  | 71.99893136  | 5  | 0.002949116  |        |                  |                       |                                                                                         |
| 767 Nitr | 1  | 63667791  | 73.22732147  | 7  | 0.00318244   |        |                  |                       |                                                                                         |
| 768 Nitr | 1  | 199491006 | 112.8925649  | 7  | -0.000697051 |        |                  |                       |                                                                                         |
| 769 Nitr | 1  | 201845500 | 115.3791094  | 11 | -0.000756257 |        |                  |                       |                                                                                         |
| 770 Nitr | 1  | 201991158 | 115.4795854  | 6  | -0.003767123 |        |                  |                       |                                                                                         |
| 771 Nitr | 1  | 202621762 | 115.91       | 5  | -0.0043      | Inside | '8.2.9'          | grmzm2g129<br>513_t01 | 'TCA / org.<br>transformation.other<br>organic acid<br>transformaitons.cyt<br>MDH'      |
| 772 Nitr | 1  | 207277145 | 119.465065   | 11 | -0.000793889 | Inside | '20.2.99'        | grmzm2g363<br>004_t01 | 'stress.abiotic.unspecifie<br>d'                                                        |
| 773 Nitr | 1  | 207279145 | 119.4669916  | 8  | -0.000840239 |        |                  |                       |                                                                                         |



|          |   |           |              |    |              |        |           |                       |                                                                              |
|----------|---|-----------|--------------|----|--------------|--------|-----------|-----------------------|------------------------------------------------------------------------------|
| 774 Nitr | 1 | 207313090 | 119.4996915  | 12 | -0.000961106 | Inside | '17.7.1.5 | grmzm2g148            | 'hormone<br>metabolism.jasmonate.synthesis-degradation.12-Oxo-PDA-reductase' |
| 775 Nitr | 1 | 224410655 | 132.7669157  | 12 | -0.0094014   |        | '         | 281_t01               |                                                                              |
| 776 Nitr | 1 | 232515055 | 138.1818938  | 6  | 0.011437559  |        |           |                       |                                                                              |
| 777 Nitr | 1 | 233097149 | 138.4111567  | 9  | 0.012678888  |        |           |                       |                                                                              |
| 778 Nitr | 1 | 249984566 | 148.2769963  | 25 | 0.000988754  |        |           |                       |                                                                              |
| 779 Nitr | 1 | 254217830 | 150.9046175  | 9  | 0.040341299  | Inside | '30.11'   | grmzm2g172<br>506_t01 | 'signalling.light'                                                           |
| 780 Nitr | 1 | 254218603 | 150.9052401  | 13 | 0.038373926  | Inside | '30.11'   | grmzm2g172<br>506_t01 | 'signalling.light'                                                           |
| 781 Nitr | 1 | 256241409 | 152.3975751  | 16 | 1.893176617  |        |           |                       |                                                                              |
| 782 Nitr | 1 | 256250277 | 152.4041229  | 6  | -3.973615173 |        |           |                       |                                                                              |
| 783 Nitr | 1 | 256300512 | 152.4470842  | 7  | -0.373608989 |        |           |                       |                                                                              |
| 784 Nitr | 1 | 257414838 | 153.4001486  | 40 | -0.007243298 |        |           |                       |                                                                              |
| 785 Nitr | 1 | 297905073 | 202.4622232  | 6  | -0.001303846 |        |           |                       |                                                                              |
| 786 Nitr | 2 | 3805      | -5.496235757 | 26 | 0.001182912  |        |           |                       |                                                                              |
| 787 Nitr | 2 | 2023274   | 3.619749446  | 24 | 0.001176073  |        |           |                       |                                                                              |
| 788 Nitr | 2 | 2211917   | 4.471293489  | 10 | 0.001669864  | Inside | '30.2.11' | grmzm2g452<br>142_t01 | 'signalling.receptor<br>kinases.leucine rich<br>repeat XI'                   |
| 789 Nitr | 2 | 2491029   | 5.715556905  | 6  | 0.000821883  |        |           |                       |                                                                              |
| 790 Nitr | 2 | 9387311   | 27.56530943  | 6  | 0.001306219  |        |           |                       |                                                                              |
| 791 Nitr | 2 | 31005737  | 62.07871475  | 22 | 0.001211646  |        |           |                       |                                                                              |
| 792 Nitr | 2 | 36815670  | 65.26831102  | 10 | 0.001463549  |        |           |                       |                                                                              |
| 793 Nitr | 2 | 37323751  | 65.60272826  | 11 | 0.002275836  |        |           |                       |                                                                              |
| 794 Nitr | 2 | 181079834 | 90.99646529  | 39 | 0.001816495  |        |           |                       |                                                                              |
| 795 Nitr | 2 | 182483954 | 92.38830408  | 38 | 0.001818773  |        |           |                       |                                                                              |
| 796 Nitr | 2 | 183983052 | 94.29078232  | 8  | 0.002369111  | Inside | '27.3.99' | grmzm2g168<br>163_t02 | 'RNA.regulation of<br>transcription.unclassified'                            |

|          |   |           |             |    |              |        |           |                                                                     |
|----------|---|-----------|-------------|----|--------------|--------|-----------|---------------------------------------------------------------------|
| 797 Nitr | 2 | 186765944 | 97.99865221 | 7  | 0.001224906  |        |           |                                                                     |
| 798 Nitr | 2 | 203303901 | 111.3475511 | 5  | 0.002210804  |        |           |                                                                     |
| 799 Nitr | 2 | 211231604 | 122.5790956 | 20 | 0.002091497  |        |           |                                                                     |
| 800 Nitr | 2 | 212538395 | 124.4779034 | 10 | 0.002047508  |        |           |                                                                     |
| 801 Nitr | 3 | 8109850   | 29.6995263  | 14 | 0.003636405  |        |           |                                                                     |
| 802 Nitr | 3 | 8678939   | 31.22826072 | 19 | 0.003500894  |        |           |                                                                     |
| 803 Nitr | 3 | 8924944   | 31.88908441 | 11 | 0.003569052  |        |           |                                                                     |
| 804 Nitr | 3 | 158547954 | 71.48562889 | 28 | 0.000938613  |        |           |                                                                     |
| 805 Nitr | 3 | 210217529 | 120.7696561 | 15 | -0.000777862 |        |           |                                                                     |
| 806 Nitr | 3 | 212234516 | 123.2864138 | 11 | -0.00092326  |        |           |                                                                     |
| 807 Nitr | 3 | 212247177 | 123.3022119 | 10 | -0.000811602 |        |           |                                                                     |
| 808 Nitr | 3 | 212248108 | 123.3033736 | 27 | -0.000852191 |        |           |                                                                     |
| 809 Nitr | 3 | 212248700 | 123.3041123 | 15 | -0.000804228 | Inside | '26.28'   | grmzm2g047<br>129_t02 'misc.GDSL-motif lipase'                      |
| 810 Nitr | 3 | 213848077 | 126.6554907 | 7  | -0.000894249 | Inside | '1.5.1'   | grmzm2g348 'PS.carbon concentrating<br>512_t03 mechanism.C4'        |
| 811 Nitr | 4 | 11351925  | 31.69382335 | 5  | -0.003583568 |        |           |                                                                     |
| 812 Nitr | 4 | 11970641  | 33.81499619 | 6  | -0.003758507 |        |           |                                                                     |
| 813 Nitr | 4 | 25849988  | 48.23626239 | 5  | 0.001059419  | Inside | '34.13'   | grmzm2g026 'transport.peptides and<br>459_t01 oligopeptides'        |
| 814 Nitr | 4 | 25850469  | 48.23645002 | 7  | 0.001284805  | Inside | '34.13'   | grmzm2g026 'transport.peptides and<br>459_t01 oligopeptides'        |
| 815 Nitr | 4 | 28177658  | 49.14422457 | 25 | 0.002716247  |        |           |                                                                     |
| 816 Nitr | 4 | 28839372  | 49.4032225  | 7  | 0.005200168  |        |           |                                                                     |
| 817 Nitr | 4 | 101964449 | 57.85755427 | 9  | 0.003029113  |        |           |                                                                     |
| 818 Nitr | 4 | 110010755 | 58.02556787 | 12 | 0.001209715  |        |           |                                                                     |
| 819 Nitr | 4 | 130200550 | 58.67643598 | 10 | 0.001469707  |        |           |                                                                     |
| 820 Nitr | 4 | 149531302 | 61.9954463  | 8  | 0.004684307  |        |           |                                                                     |
| 821 Nitr | 4 | 163054280 | 73.24125003 | 10 | -0.002480041 | Inside | '27.3.99' | grmzm2g141 'RNA.regulation of<br>036_t01 transcription.unclassified |
| 822 Nitr | 4 | 163084391 | 73.26227648 | 17 | -0.002987557 |        |           |                                                                     |
| 823 Nitr | 4 | 165718843 | 75.10190893 | 25 | -0.003343143 |        |           |                                                                     |

|          |   |           |             |    |              |        |            |                       |                                                                           |
|----------|---|-----------|-------------|----|--------------|--------|------------|-----------------------|---------------------------------------------------------------------------|
| 824 Nitr | 4 | 166175217 | 75.86       | 5  | -0.0009      | Inside | '12.2.2'   | grmzm2g036<br>464_t01 | 'N-metabolism.ammonia<br>metabolism.glutamine<br>synthase'                |
| 825 Nitr | 4 | 167831848 | 76.66597097 | 7  | -0.002511466 |        |            |                       |                                                                           |
| 826 Nitr | 4 | 170457980 | 78.38642641 | 8  | -0.002662805 | Inside | '30.5'     | grmzm2g142<br>806_t01 | 'signalling.G-proteins'                                                   |
| 827 Nitr | 4 | 177460609 | 88.85205365 | 6  | -0.000971011 |        |            |                       |                                                                           |
| 828 Nitr | 4 | 179532567 | 92.44677404 | 28 | -0.002935932 |        |            |                       |                                                                           |
| 829 Nitr | 4 | 242018406 | 128.094256  | 5  | -0.026531277 |        |            |                       |                                                                           |
| 830 Nitr | 4 | 242343398 | 129.4163957 | 6  | 0.793685036  | Inside | '26.19'    | grmzm2g101<br>916_t01 | 'misc.plastocyanin-like'                                                  |
| 831 Nitr | 5 | 4862213   | 16.72130612 | 9  | 0.003196165  |        |            |                       |                                                                           |
| 832 Nitr | 5 | 4925927   | 17.04607872 | 10 | 0.002167269  |        |            |                       |                                                                           |
| 833 Nitr | 5 | 7664787   | 29.12019513 | 5  | 0.001140887  |        |            |                       |                                                                           |
| 834 Nitr | 5 | 162808563 | 76.42708275 | 6  | 0.003808286  |        |            |                       |                                                                           |
| 835 Nitr | 5 | 184229490 | 93.51868254 | 5  | 0.001723644  |        |            |                       |                                                                           |
| 836 Nitr | 5 | 184794208 | 94.16914109 | 6  | 0.001178069  |        |            |                       |                                                                           |
| 837 Nitr | 5 | 185030768 | 94.44161776 | 7  | 0.001440241  |        |            |                       |                                                                           |
| 838 Nitr | 5 | 185056309 | 94.47103662 | 10 | 0.001491703  |        |            |                       |                                                                           |
| 839 Nitr | 5 | 185687667 | 95.19825306 | 8  | 0.001158127  | Inside | '29.4'     | grmzm2g096<br>753_t01 | 'protein.postranslational<br>modification'                                |
| 840 Nitr | 5 | 185860200 | 95.39698157 | 5  | 0.000263629  | Inside | '16.2.1.1' | grmzm2g074<br>604_t02 | 'secondary<br>metabolism.phenylpropa<br>noids.lignin<br>biosynthesis.PAL' |
| 841 Nitr | 5 | 190089272 | 99.5622766  | 29 | -0.023979728 | Inside | '31.3'     | grmzm2g160<br>563_t01 | 'cell.cycle'                                                              |
| 842 Nitr | 5 | 190169366 | 99.64088567 | 25 | -0.032819686 |        |            |                       |                                                                           |
| 843 Nitr | 5 | 190751918 | 100.0087423 | 59 | 0.060946443  |        |            |                       |                                                                           |
| 844 Nitr | 5 | 191728507 | 101.2378277 | 61 | -0.033148662 |        |            |                       |                                                                           |
| 845 Nitr | 5 | 205478714 | 119.252956  | 9  | -0.001744117 |        |            |                       |                                                                           |
| 846 Nitr | 5 | 205662825 | 119.8501543 | 20 | -0.001468083 |        |            |                       |                                                                           |

|          |    |           |             |    |              |        |           |                                                                                      |
|----------|----|-----------|-------------|----|--------------|--------|-----------|--------------------------------------------------------------------------------------|
| 847 Nitr | 5  | 205964077 | 120.8273212 | 11 | -0.000771887 |        |           |                                                                                      |
| 848 Nitr | 5  | 207101210 | 124.0824263 | 25 | -0.003509329 |        |           |                                                                                      |
| 849 Nitr | 5  | 207118376 | 124.1210629 | 12 | -0.000821003 |        |           |                                                                                      |
| 850 Nitr | 5  | 207498927 | 124.9743369 | 13 | -0.003573299 |        |           |                                                                                      |
| 851 Nitr | 5  | 211861691 | 137.9485929 | 9  | -0.00209302  |        |           |                                                                                      |
| 852 Nitr | 6  | 78467563  | 11.02628868 | 8  | 0.00613447   |        |           |                                                                                      |
| 853 Nitr | 6  | 92041721  | 18.74190429 | 8  | -0.007360541 |        |           |                                                                                      |
| 854 Nitr | 6  | 164046344 | 96.23353408 | 8  | 0.00311268   |        |           |                                                                                      |
| 855 Nitr | 7  | 94080369  | 50.29845615 | 7  | -0.002187415 |        |           |                                                                                      |
| 856 Nitr | 7  | 97073633  | 50.59965001 | 5  | -0.003762497 |        |           |                                                                                      |
| 857 Nitr | 7  | 121206635 | 61.30136801 | 7  | 0.003846053  |        |           |                                                                                      |
| 858 Nitr | 7  | 145280969 | 83.18936747 | 6  | 0.000758506  | Inside | '27.3.11' | grmzm2g163 095_t01 'RNA.regulation of transcription.C2H2 zinc finger family'         |
| 859 Nitr | 7  | 152493835 | 91.25002624 | 19 | 0.000787893  |        |           |                                                                                      |
| 860 Nitr | 8  | 20733895  | 45.60822058 | 7  | 0.002081662  |        |           |                                                                                      |
| 861 Nitr | 8  | 139383376 | 71.29644034 | 13 | -0.004157906 |        |           |                                                                                      |
| 862 Nitr | 8  | 147013249 | 76.63825194 | 16 | 0.004700156  |        |           |                                                                                      |
| 863 Nitr | 8  | 150840981 | 79.70937466 | 9  | 0.002809057  |        |           |                                                                                      |
| 864 Nitr | 8  | 160985585 | 90.37557478 | 10 | -0.000844257 |        |           |                                                                                      |
| 865 Nitr | 9  | 23279446  | 40.13731735 | 8  | -0.000527851 |        |           |                                                                                      |
| 866 Nitr | 9  | 23407123  | 40.42055726 | 5  | -0.000732831 |        |           |                                                                                      |
| 867 Nitr | 9  | 25029010  | 42.41502107 | 13 | -0.000589684 |        |           |                                                                                      |
| 868 Nitr | 9  | 121495902 | 60.17794088 | 5  | -0.000866371 |        |           |                                                                                      |
| 869 Nitr | 9  | 151011382 | 109.2060086 | 64 | 0.003263514  | Inside | '1.2'     | grmzm2g168 281_t01 'PS.photosynthesis'                                               |
| 870 Nitr | 10 | 146509918 | 91.0233194  | 8  | 0.000766245  |        |           |                                                                                      |
| 871 Nitr | 10 | 146628442 | 91.61626493 | 10 | 0.000710638  |        |           |                                                                                      |
| 872 Nitr | 10 | 146744873 | 92.26893726 | 17 | 0.000679393  |        |           |                                                                                      |
| 873 Nitr | 10 | 147132717 | 94.44305795 | 6  | 0.000722548  |        |           |                                                                                      |
| 874 Nitr | 10 | 147981037 | 99.19844948 | 12 | 0.000848392  |        |           |                                                                                      |
| 875 Nitr | 10 | 148513914 | 102.1855755 | 14 | 0.000913186  | Inside | '23.4.99' | grmzm2g104 918_t04 'nucleotide metabolism.phosphotransfer and pyrophosphatases.misc' |
| 876 Prot | 1  | 64910659  | 74.0301357  | 9  | -0.006095916 | Inside | '34.3'    | grmzm2g306 919_t01 'transport.amino acids'                                           |

|          |   |           |              |    |              |        |          |                       |                                                                                 |
|----------|---|-----------|--------------|----|--------------|--------|----------|-----------------------|---------------------------------------------------------------------------------|
| 877 Prot | 1 | 64910976  | 74.03036785  | 33 | -0.006371905 | Inside | '34.3'   | grmzm2g306<br>919_t01 | 'transport.amino acids'                                                         |
| 878 Prot | 1 | 69196228  | 76.41372859  | 13 | -0.006630505 |        |          |                       |                                                                                 |
| 879 Prot | 1 | 69271066  | 76.45177556  | 5  | -0.007173736 |        |          |                       |                                                                                 |
| 880 Prot | 1 | 74985643  | 79.35701503  | 8  | -0.015969066 |        |          |                       |                                                                                 |
| 881 Prot | 1 | 252882663 | 149.8292876  | 8  | 0.008583908  |        |          |                       |                                                                                 |
| 882 Prot | 2 | 20043374  | 50.80064207  | 26 | -0.006974803 |        |          |                       |                                                                                 |
| 883 Prot | 2 | 185457136 | 96.16151574  | 6  | 0.006649714  |        |          |                       |                                                                                 |
| 884 Prot | 3 | 1187527   | -0.271888706 | 19 | 0.008814859  |        |          |                       |                                                                                 |
| 885 Prot | 3 | 127883944 | 61.0242801   | 19 | -0.009978835 |        |          |                       |                                                                                 |
| 886 Prot | 3 | 127884222 | 61.02430232  | 7  | -0.008779638 |        |          |                       |                                                                                 |
| 887 Prot | 3 | 131786653 | 61.68464041  | 6  | -0.014158624 | Inside | '30.5'   | grmzm2g084<br>606_t01 | 'signalling.G-proteins'                                                         |
| 888 Prot | 3 | 179931178 | 91.94664886  | 37 | -0.006464741 |        |          |                       |                                                                                 |
| 889 Prot | 3 | 186207858 | 97.81793168  | 13 | -0.009426898 |        |          |                       |                                                                                 |
| 890 Prot | 3 | 186596173 | 98.06048224  | 5  | -0.00757709  |        |          |                       |                                                                                 |
| 891 Prot | 3 | 188565185 | 99.29037279  | 6  | -0.006679739 | Inside | '17.5.3' | grmzm2g440<br>529_t01 | 'hormone<br>metabolism.ethylene.ind<br>uced-regulated-<br>responsive-activated' |
| 892 Prot | 3 | 203411410 | 111.3198505  | 6  | -0.006026391 |        |          |                       |                                                                                 |
| 893 Prot | 3 | 212222986 | 123.2720269  | 21 | -0.006839459 |        |          |                       |                                                                                 |
| 894 Prot | 3 | 212224642 | 123.2740932  | 16 | -0.007350952 |        |          |                       |                                                                                 |
| 895 Prot | 3 | 213226535 | 125.1288155  | 17 | -0.008878007 |        |          |                       |                                                                                 |
| 896 Prot | 3 | 213800913 | 126.5396432  | 5  | -0.007297196 |        |          |                       |                                                                                 |
| 897 Prot | 3 | 213854238 | 126.6706238  | 9  | -0.007474129 | Inside | '1.5.1'  | grmzm2g348<br>512_t01 | 'PS.carbon concentrating<br>mechanism.C4'                                       |
| 898 Prot | 3 | 217611213 | 133.5696863  | 6  | -0.008173794 | Inside | '27.3.6' | grmzm2g081<br>816_t03 | 'RNA.regulation of<br>transcription.bHLH,Basi<br>c Helix-Loop-Helix<br>family'  |
| 899 Prot | 4 | 168096468 | 76.74550042  | 5  | -0.013008569 |        |          |                       |                                                                                 |

|          |   |           |             |    |              |        |            |            |         |                                                                      |
|----------|---|-----------|-------------|----|--------------|--------|------------|------------|---------|----------------------------------------------------------------------|
| 900 Prot | 4 | 227245511 | 112.6233194 | 44 | 0.009730652  | Inside | grmzm2g112 | '10.7'     | 619_t01 | 'cell wall.modification'                                             |
| 901 Prot | 4 | 230742777 | 113.8187579 | 6  | 0.008891322  |        |            |            |         |                                                                      |
| 902 Prot | 5 | 88557383  | 69.4927261  | 74 | -0.007848454 | Inside | grmzm2g134 | '10.5.1.1' | 528_t01 | 'cell wall.cell wall proteins.AGPs.AGP'                              |
| 903 Prot | 5 | 91037740  | 69.69522773 | 20 | -0.006780225 |        |            |            |         |                                                                      |
| 904 Prot | 5 | 186016180 | 95.57664385 | 5  | -0.00735679  |        |            |            |         |                                                                      |
| 905 Prot | 5 | 187955512 | 97.81042264 | 8  | -0.005429395 |        |            |            |         |                                                                      |
| 906 Prot | 5 | 189228254 | 98.86708725 | 21 | -0.007553606 |        |            |            |         |                                                                      |
| 907 Prot | 5 | 203170982 | 112.0815943 | 20 | -0.006893258 |        |            |            |         |                                                                      |
| 908 Prot | 5 | 205646722 | 119.7979212 | 18 | -0.005971484 | Inside | grmzm2g074 | '17.2.2'   | 267_t01 | 'hormone metabolism.auxin.signal transduction'                       |
| 909 Prot | 5 | 206043601 | 121.085272  | 6  | -0.006353574 |        |            |            |         |                                                                      |
| 910 Prot | 5 | 208092874 | 126.5365424 | 6  | -0.005967461 | Inside | grmzm2g045 | '27.3.6'   | 883_t01 | 'RNA.regulation of transcription.bHLH,Basic Helix-Loop-Helix family' |
| 911 Prot | 6 | 22422464  | 7.104655221 | 26 | -0.006334214 |        |            |            |         |                                                                      |
| 912 Prot | 6 | 35896471  | 8.2773635   | 5  | -0.005965884 |        |            |            |         |                                                                      |
| 913 Prot | 6 | 72931425  | 10.26780431 | 14 | -0.004869067 |        |            |            |         |                                                                      |
| 914 Prot | 6 | 72985636  | 10.2733065  | 9  | -0.004940372 | Inside | grmzm2g047 | '27.1.19'  | 265_t01 | 'RNA.processing.ribonucleases'                                       |
| 915 Prot | 6 | 73021951  | 10.27699232 | 13 | -0.0080408   |        |            |            |         |                                                                      |
| 916 Prot | 6 | 168683648 | 108.6048676 | 13 | 0.011314553  |        |            |            |         |                                                                      |
| 917 Prot | 6 | 168748906 | 108.622076  | 35 | 0.007222797  |        |            |            |         |                                                                      |
| 918 Prot | 7 | 5099065   | 21.78417429 | 9  | -0.008417978 | Inside | grmzm2g011 | '31.1'     | 800_t01 | 'cell.organisation'                                                  |
| 919 Prot | 7 | 33595519  | 47.99555999 | 10 | 0.00514782   |        |            |            |         |                                                                      |

|          |    |           |             |    |              |        |          |                       |                                                               |
|----------|----|-----------|-------------|----|--------------|--------|----------|-----------------------|---------------------------------------------------------------|
| 920 Prot | 7  | 154247787 | 94.54909037 | 7  | 0.005825457  | Inside | '30.2.3' | grmzm2g006<br>505_t02 | 'signalling.receptor<br>kinases.leucine rich<br>repeat III'   |
| 921 Prot | 7  | 157249277 | 100.7051801 | 14 | 0.006706373  |        |          |                       |                                                               |
| 922 Prot | 7  | 158036207 | 102.3366246 | 5  | 0.005791282  |        |          |                       |                                                               |
| 923 Prot | 7  | 159778542 | 106.10253   | 6  | 0.012461708  |        |          |                       |                                                               |
| 924 Prot | 7  | 168378312 | 131.3238192 | 8  | -0.007477326 |        |          |                       |                                                               |
| 925 Prot | 8  | 21881574  | 47.44607971 | 10 | 0.011659826  | Inside | '27.2'   | grmzm2g032<br>551_t01 | 'RNA.transcription'                                           |
| 926 Prot | 8  | 108880988 | 60.59133569 | 5  | 0.008562491  |        |          |                       |                                                               |
| 927 Prot | 8  | 115683038 | 62.57820324 | 5  | 0.008392785  |        |          |                       |                                                               |
| 928 Prot | 8  | 117977083 | 63.86243699 | 51 | 0.01116072   | Inside | '26.7'   | grmzm2g142<br>584_t01 | 'misc.oxidases - copper,<br>flavone etc.'                     |
| 929 Prot | 8  | 129392376 | 68.26348656 | 8  | 0.009582417  |        |          |                       |                                                               |
| 930 Prot | 8  | 131868393 | 69.1089486  | 5  | -0.007281874 | Inside | '33.1'   | grmzm2g005<br>552_t01 | 'development.storage<br>proteins'                             |
| 931 Prot | 8  | 161242940 | 90.87698678 | 53 | -0.005415146 |        |          |                       |                                                               |
| 932 Prot | 8  | 170967906 | 124.4926125 | 15 | -0.010060425 |        |          |                       |                                                               |
| 933 Prot | 9  | 73386482  | 45.90639706 | 5  | -0.006073526 |        |          |                       |                                                               |
| 934 Prot | 9  | 75752943  | 46.01866137 | 10 | -0.00678119  |        |          |                       |                                                               |
| 935 Prot | 9  | 86122013  | 46.66594904 | 22 | -0.007718805 |        |          |                       |                                                               |
| 936 Prot | 9  | 98709960  | 49.58225494 | 8  | -0.00680033  | Inside | '10.6.2' | grmzm2g146<br>523_t01 | 'cell<br>wall.degradation.mannan-<br>xylose-arabinose-fucose' |
| 937 Prot | 9  | 112772173 | 55.72841749 | 8  | -0.006998869 |        |          |                       |                                                               |
| 938 Prot | 9  | 113322955 | 55.98017627 | 24 | -0.006456001 |        |          |                       |                                                               |
| 939 Prot | 9  | 113731726 | 56.16702277 | 6  | -0.00865215  |        |          |                       |                                                               |
| 940 Prot | 9  | 120621679 | 59.56922799 | 5  | -0.00678539  |        |          |                       |                                                               |
| 941 Prot | 9  | 122100192 | 60.59870208 | 5  | -0.007751436 |        |          |                       |                                                               |
| 942 Prot | 9  | 143538206 | 90.82527553 | 10 | -0.007521104 |        |          |                       |                                                               |
| 943 Prot | 9  | 144829091 | 93.82411792 | 25 | -0.004785192 |        |          |                       |                                                               |
| 944 Prot | 10 | 10440954  | 28.50645685 | 9  | -0.008130968 |        |          |                       |                                                               |
| 945 Prot | 10 | 16919807  | 33.52470383 | 16 | 0.007567347  |        |          |                       |                                                               |





|          |   |           |             |    |              |        |           |                       |                                          |
|----------|---|-----------|-------------|----|--------------|--------|-----------|-----------------------|------------------------------------------|
| 969 Star | 2 | 27790884  | 58.80007957 | 13 | -0.032182719 | Inside | '34.19.1' | grmzm2g178<br>693_t01 | 'transport.Major Intrinsic Proteins.PIP' |
| 970 Star | 2 | 28788480  | 60.39948962 | 5  | -0.024239309 | Inside | '26.3'    | grmzm2g012<br>236_t01 | 'misc.gluco-, galacto- and mannosidases' |
| 971 Star | 2 | 28788620  | 60.39963767 | 12 | -0.023889437 | Inside | '26.3'    | grmzm2g012<br>236_t01 | 'misc.gluco-, galacto- and mannosidases' |
| 972 Star | 2 | 28960635  | 60.58154184 | 5  | -0.030823242 |        |           |                       |                                          |
| 973 Star | 2 | 28970761  | 60.59224999 | 8  | -0.031083803 |        |           |                       |                                          |
| 974 Star | 2 | 28972476  | 60.59406358 | 35 | -0.02957084  |        |           |                       |                                          |
| 975 Star | 2 | 107216168 | 76.50296846 | 7  | -0.030529227 |        |           |                       |                                          |
| 976 Star | 2 | 194191603 | 105.3998294 | 6  | -0.020841194 |        |           |                       |                                          |
| 977 Star | 2 | 201217096 | 109.0293094 | 10 | -0.026005633 | Inside | '30.2.17' | grmzm2g140<br>231_t01 | 'signalling.receptor kinases.DUF 26'     |
| 978 Star | 2 | 203650489 | 111.7689321 | 15 | -0.025557901 |        |           |                       |                                          |
| 979 Star | 2 | 205289573 | 113.7617273 | 5  | -0.031413614 |        |           |                       |                                          |
| 980 Star | 2 | 205289574 | 113.7617285 | 9  | -0.027499236 |        |           |                       |                                          |
| 981 Star | 2 | 214729037 | 127.4005253 | 5  | -0.017802912 |        |           |                       |                                          |
| 982 Star | 2 | 215881188 | 128.7144115 | 7  | -0.017742045 |        |           |                       |                                          |
| 983 Star | 2 | 217125385 | 130.3224898 | 5  | -0.027701512 |        |           |                       |                                          |
| 984 Star | 2 | 217810072 | 131.5466232 | 5  | -0.0237361   |        |           |                       |                                          |
| 985 Star | 3 | 3123500   | 9.745986067 | 7  | 0.038612596  | Inside | '26.28'   | grmzm2g085<br>176_t01 | 'misc.GDSL-motif lipase'                 |
| 986 Star | 3 | 3780999   | 13.14827662 | 22 | 0.028169623  |        |           |                       |                                          |
| 987 Star | 3 | 3836355   | 13.43472146 | 17 | 0.031403613  |        |           |                       |                                          |

|           |   |           |             |    |              |        |                                                                                                 |
|-----------|---|-----------|-------------|----|--------------|--------|-------------------------------------------------------------------------------------------------|
| 988 Star  | 3 | 14416721  | 41.56032683 | 5  | -0.028022937 |        |                                                                                                 |
| 989 Star  | 3 | 17306447  | 45.29685092 | 89 | -0.032281971 | Inside | '15.2' grmzm2g099 340_t01 'metal handling, binding, chelation and storage'                      |
| 990 Star  | 3 | 51981075  | 56.79858368 | 90 | 0.084784527  |        |                                                                                                 |
| 991 Star  | 3 | 170725018 | 81.65819468 | 5  | -0.07741098  |        |                                                                                                 |
| 992 Star  | 3 | 178840635 | 90.20644881 | 8  | 0.036888541  |        |                                                                                                 |
| 993 Star  | 3 | 192649685 | 100.9866632 | 10 | -0.050036116 | Inside | '17.2.3' grmzm2g033 359_t01 'hormone metabolism, auxin, induced-regulated-responsive-activated' |
| 994 Star  | 3 | 192874331 | 101.0880183 | 8  | -0.042136484 |        |                                                                                                 |
| 995 Star  | 3 | 192949443 | 101.1219071 | 9  | -0.0571714   |        |                                                                                                 |
| 996 Star  | 3 | 193619852 | 101.4802146 | 6  | -0.049654665 |        |                                                                                                 |
| 997 Star  | 3 | 193620690 | 101.4814585 | 27 | -0.053595039 |        |                                                                                                 |
| 998 Star  | 3 | 194144683 | 102.2592936 | 5  | -0.038147905 |        |                                                                                                 |
| 999 Star  | 4 | 24269222  | 47.52251807 | 66 | 0.054432733  |        |                                                                                                 |
| 1000 Star | 4 | 26928416  | 48.65692848 | 6  | 0.054001982  |        |                                                                                                 |
| 1001 Star | 4 | 63204562  | 55.58951138 | 5  | -0.024189406 |        |                                                                                                 |
| 1002 Star | 4 | 116242442 | 58.15932573 | 10 | -0.026678988 |        |                                                                                                 |
| 1003 Star | 4 | 194884222 | 103.0017383 | 8  | -0.034945398 |        |                                                                                                 |
| 1004 Star | 4 | 194952409 | 103.053073  | 8  | -0.027789043 |        |                                                                                                 |
| 1005 Star | 4 | 240714112 | 124.303751  | 25 | -0.017633483 |        |                                                                                                 |
| 1006 Star | 4 | 245062382 | 140.1088204 | 5  | -0.026856027 |        |                                                                                                 |
| 1007 Star | 4 | 245730715 | 144.0453722 | 15 | -0.017329439 |        |                                                                                                 |
| 1008 Star | 4 | 245730944 | 144.0467211 | 11 | -0.017442961 |        |                                                                                                 |
| 1009 Star | 4 | 245787531 | 144.3800244 | 15 | -0.026106421 |        |                                                                                                 |
| 1010 Star | 4 | 246077836 | 146.0899515 | 5  | -0.021761826 |        |                                                                                                 |
| 1011 Star | 5 | 1529458   | 1.89866854  | 11 | -0.026956905 |        |                                                                                                 |
| 1012 Star | 5 | 1532216   | 1.906091195 | 16 | -0.020171388 |        |                                                                                                 |
| 1013 Star | 5 | 1735588   | 2.453429899 | 6  | -0.019083198 |        |                                                                                                 |
| 1014 Star | 5 | 1879182   | 2.839887002 | 5  | -0.025793792 |        |                                                                                                 |
| 1015 Star | 5 | 20941271  | 51.30637712 | 10 | -0.050307121 | Inside | '28.1' grmzm2g146 041_t03 'DNA, synthesis/chromatin structure'                                  |
| 1016 Star | 5 | 75996032  | 67.01800088 | 5  | 0.071648285  | Inside | '27.3.60' grmzm2g042 278_t01 'RNA, regulation of transcription, NIN-like bZIP-related family'   |
| 1017 Star | 5 | 96165401  | 69.92179085 | 29 | 0.054394768  |        |                                                                                                 |

|      |      |   |           |             |    |              |        |                                 |                                                                           |
|------|------|---|-----------|-------------|----|--------------|--------|---------------------------------|---------------------------------------------------------------------------|
| 1018 | Star | 5 | 145308951 | 72.52912618 | 15 | -0.06568065  |        |                                 |                                                                           |
| 1019 | Star | 5 | 168868583 | 80.63961419 | 67 | -0.073140188 | Inside | '2.2.1.3. grmzm2g139<br>2'      | 'major CHO<br>metabolism.degradation.<br>sucrose.invertases.cell<br>wall' |
| 1020 | Star | 5 | 171396511 | 83.30241817 | 34 | 0.023072258  |        |                                 |                                                                           |
| 1021 | Star | 5 | 174165684 | 85.75501381 | 25 | 0.029476756  |        |                                 |                                                                           |
| 1022 | Star | 5 | 174821506 | 86.48707371 | 5  | 0.027732203  |        |                                 |                                                                           |
| 1023 | Star | 5 | 193444292 | 102.0960523 | 28 | 0.019728235  |        |                                 |                                                                           |
| 1024 | Star | 5 | 195201674 | 103.5571638 | 6  | 0.019382462  |        |                                 |                                                                           |
| 1025 | Star | 5 | 203772980 | 114.279637  | 34 | 0.032389813  |        |                                 |                                                                           |
| 1026 | Star | 5 | 204520039 | 116.1433154 | 8  | 0.021779461  |        |                                 |                                                                           |
| 1027 | Star | 5 | 205480420 | 119.2584897 | 23 | 0.024091119  |        |                                 |                                                                           |
| 1028 | Star | 5 | 207749910 | 125.7434999 | 9  | 0.032228364  |        |                                 |                                                                           |
| 1029 | Star | 6 | 25145461  | 7.801186431 | 11 | -0.069037952 |        |                                 |                                                                           |
| 1030 | Star | 6 | 118288607 | 43.43874583 | 32 | -0.072025188 | Inside | '30.2.99' grmzm2g059<br>634_t01 | 'signalling.receptor<br>kinases.misc'                                     |
| 1031 | Star | 6 | 119252741 | 43.97152587 | 16 | -0.049737056 |        |                                 |                                                                           |
| 1032 | Star | 6 | 156368499 | 74.39513977 | 7  | 0.053819036  |        |                                 |                                                                           |
| 1033 | Star | 6 | 166337059 | 105.4357129 | 22 | -0.05306977  |        |                                 |                                                                           |
| 1034 | Star | 6 | 166977847 | 107.6073304 | 44 | -0.037821131 |        |                                 |                                                                           |
| 1035 | Star | 7 | 18458794  | 44.19878603 | 5  | -0.027460741 |        |                                 |                                                                           |
| 1036 | Star | 7 | 20248668  | 44.70548997 | 38 | -0.042578673 |        |                                 |                                                                           |
| 1037 | Star | 7 | 20380953  | 44.78804553 | 7  | -0.06171405  |        |                                 |                                                                           |
| 1038 | Star | 7 | 21623347  | 45.56339066 | 5  | -0.02739467  | Inside | '34.12' ac205008.4_f<br>gt002   | 'transport.metal'                                                         |
| 1039 | Star | 7 | 25948068  | 46.52566875 | 5  | -0.043273669 |        |                                 |                                                                           |
| 1040 | Star | 7 | 29953895  | 47.26241735 | 12 | -0.028721815 |        |                                 |                                                                           |
| 1041 | Star | 7 | 126449302 | 67.30732758 | 10 | -0.021768781 |        |                                 |                                                                           |
| 1042 | Star | 7 | 151507555 | 89.39729712 | 9  | -0.032132802 |        |                                 |                                                                           |
| 1043 | Star | 7 | 151913077 | 90.15766003 | 9  | -0.079858825 | Inside | '31.1' grmzm2g057<br>380_t01    | 'cell.organisation'                                                       |
| 1044 | Star | 7 | 152316144 | 90.91580158 | 14 | -0.058489035 |        |                                 |                                                                           |
| 1045 | Star | 7 | 167105793 | 125.7933142 | 15 | 0.059219318  |        |                                 |                                                                           |
| 1046 | Star | 7 | 168184709 | 130.4823997 | 13 | 0.045148368  |        |                                 |                                                                           |

|      |      |    |           |              |    |              |        |          |                                                                                    |
|------|------|----|-----------|--------------|----|--------------|--------|----------|------------------------------------------------------------------------------------|
| 1047 | Star | 7  | 168193557 | 130.520854   | 5  | 0.036616985  |        |          |                                                                                    |
| 1048 | Star | 8  | 121670463 | 65.96008974  | 11 | 0.045441796  |        |          |                                                                                    |
| 1049 | Star | 8  | 121963051 | 66.1316561   | 6  | 0.042894621  |        |          |                                                                                    |
| 1050 | Star | 8  | 144585092 | 74.43452065  | 10 | -0.055256199 | Inside | '11.3'   | grmzm2g177<br>150_t01<br>'lipid<br>metabolism.Phospholipi<br>d synthesis'          |
| 1051 | Star | 8  | 144767036 | 74.6069579   | 5  | -0.056636807 | Inside | '16.8.3' | grmzm2g013<br>726_t01<br>'secondary<br>metabolism.flavonoids.di<br>hydroflavonols' |
| 1052 | Star | 8  | 145553053 | 75.35190474  | 19 | -0.047411963 |        |          |                                                                                    |
| 1053 | Star | 8  | 149499942 | 78.63341235  | 8  | -0.058651712 |        |          |                                                                                    |
| 1054 | Star | 8  | 163958147 | 96.68361641  | 7  | 0.041224908  |        |          |                                                                                    |
| 1055 | Star | 8  | 164575505 | 99.62785513  | 54 | 0.021849064  | Inside | '34.99'  | grmzm2g033<br>649_t01<br>'transport.misc'                                          |
| 1056 | Star | 8  | 164575577 | 99.62807455  | 6  | 0.025622402  | Inside | '34.99'  | grmzm2g033<br>649_t01<br>'transport.misc'                                          |
| 1057 | Star | 8  | 170790378 | 123.8097673  | 5  | 0.018186972  |        |          |                                                                                    |
| 1058 | Star | 8  | 171107120 | 125.0290187  | 12 | 0.025903354  |        |          |                                                                                    |
| 1059 | Star | 8  | 171214220 | 125.4546422  | 15 | 0.023236917  |        |          |                                                                                    |
| 1060 | Star | 8  | 171235640 | 125.5397669  | 5  | 0.03304263   | Inside | '33.1'   | grmzm2g111<br>472_t01<br>'development.storage<br>proteins'                         |
| 1061 | Star | 9  | 6999006   | 8.219780095  | 15 | -0.070552837 |        |          |                                                                                    |
| 1062 | Star | 9  | 7182819   | 8.716269429  | 27 | -0.043529797 |        |          |                                                                                    |
| 1063 | Star | 9  | 7188622   | 8.731943661  | 42 | -0.041058477 |        |          |                                                                                    |
| 1064 | Star | 9  | 8451164   | 12.14214118  | 5  | -0.047028655 |        |          |                                                                                    |
| 1065 | Star | 9  | 134402439 | 70.88375129  | 15 | 0.037960828  | Inside | '31.1'   | grmzm2g020<br>982_t01<br>'cell.organisation'                                       |
| 1066 | Star | 9  | 134402663 | 70.88410046  | 6  | 0.036821304  | Inside | '31.1'   | grmzm2g020<br>982_t01<br>'cell.organisation'                                       |
| 1067 | Star | 10 | 252732    | -5.658225645 | 12 | -0.051134421 |        |          |                                                                                    |

|      |      |    |           |             |    |              |        |                   |                                                                    |
|------|------|----|-----------|-------------|----|--------------|--------|-------------------|--------------------------------------------------------------------|
| 1068 | Star | 10 | 5058530   | 14.79019912 | 16 | -0.06180889  | Inside | grmzm2g366        | 'RNA.regulation of transcription.bZIP transcription factor family' |
| 1069 | Star | 10 | 19566488  | 34.07832787 | 6  | 0.024937218  |        | '27.3.35' 264_t01 |                                                                    |
| 1070 | Star | 10 | 24052625  | 35.28519133 | 6  | -0.043928314 |        |                   |                                                                    |
| 1071 | Star | 10 | 25801766  | 35.75574637 | 8  | 0.085574049  |        |                   |                                                                    |
| 1072 | Star | 10 | 66920393  | 36.73131562 | 29 | 0.080127465  |        |                   |                                                                    |
| 1073 | Star | 10 | 89396968  | 41.46314855 | 33 | 0.05899755   |        |                   |                                                                    |
| 1074 | Star | 10 | 128172908 | 51.27327366 | 11 | 0.06244423   |        |                   |                                                                    |
| 1075 | Star | 10 | 129906986 | 52.44415722 | 5  | 0.052854061  |        |                   |                                                                    |
| 1076 | Star | 10 | 140767339 | 72.41844784 | 6  | -0.032991889 |        |                   |                                                                    |
| 1077 | Star | 10 | 141976268 | 75.93807797 | 6  | -0.020261715 |        |                   |                                                                    |
| 1078 | Star | 10 | 141976795 | 75.94005902 | 15 | -0.022617226 |        |                   |                                                                    |
| 1079 | Star | 10 | 144909314 | 84.63476656 | 5  | -0.022505092 |        |                   |                                                                    |
| 1080 | Star | 10 | 145742058 | 87.95852999 | 6  | -0.025366805 | Inside | grmzm2g006        | 'transport.p- and v- ATPases'                                      |
| 1081 | Sucr | 1  | 21442536  | 37.78627202 | 7  | -0.039016626 |        | '34.1' 894_t02    |                                                                    |
| 1082 | Sucr | 1  | 21449014  | 37.79227512 | 7  | -0.03673907  | Inside | grmzm2g004        | 'RNA.regulation of transcription.unclassified'                     |
| 1083 | Sucr | 1  | 21560442  | 37.97512826 | 47 | -0.038190551 |        | '27.3.99' 259_t01 |                                                                    |
| 1084 | Sucr | 1  | 21688795  | 38.19316881 | 12 | -0.036506395 |        |                   |                                                                    |
| 1085 | Sucr | 1  | 21689538  | 38.19443099 | 17 | -0.081014671 |        |                   |                                                                    |
| 1086 | Sucr | 1  | 56544677  | 69.98493609 | 7  | 0.091004411  |        |                   |                                                                    |
| 1087 | Sucr | 1  | 69598189  | 76.61808194 | 8  | 0.06063527   |        |                   |                                                                    |
| 1088 | Sucr | 1  | 274645019 | 167.2992575 | 6  | 0.087168737  |        |                   |                                                                    |
| 1089 | Sucr | 2  | 2076282   | 3.859030239 | 6  | -0.033975872 |        |                   |                                                                    |
| 1090 | Sucr | 2  | 3086016   | 6.851945591 | 12 | -0.032332673 |        |                   |                                                                    |
| 1091 | Sucr | 2  | 16641157  | 44.04382336 | 15 | -0.073754786 |        |                   |                                                                    |
| 1092 | Sucr | 2  | 22494974  | 54.03923714 | 9  | -0.048242813 |        |                   |                                                                    |
| 1093 | Sucr | 2  | 28592546  | 60.19229134 | 29 | -0.039020967 | Inside | grmzm2g052        | 'cell.organisation'                                                |
| 1094 | Sucr | 2  | 28594174  | 60.19401294 | 7  | -0.040826501 | Inside | grmzm2g052        | 'cell.organisation'                                                |

|      |      |   |           |             |    |              |        |           |                                                                                                                                                 |
|------|------|---|-----------|-------------|----|--------------|--------|-----------|-------------------------------------------------------------------------------------------------------------------------------------------------|
| 1095 | Sucr | 2 | 28973324  | 60.59496034 | 16 | -0.039233491 |        |           |                                                                                                                                                 |
| 1096 | Sucr | 3 | 13298136  | 40.11395447 | 19 | -0.042921756 |        |           |                                                                                                                                                 |
| 1097 | Sucr | 3 | 16863398  | 44.72397195 | 35 | -0.053561956 |        |           |                                                                                                                                                 |
| 1098 | Sucr | 3 | 16863598  | 44.72423056 | 21 | -0.054013921 |        |           |                                                                                                                                                 |
| 1099 | Sucr | 3 | 20147626  | 48.97060192 | 5  | -0.037039448 |        |           |                                                                                                                                                 |
| 1100 | Sucr | 3 | 110202362 | 58.86475128 | 7  | 0.123753616  |        |           |                                                                                                                                                 |
| 1101 | Sucr | 3 | 174587864 | 84.65461078 | 5  | 0.067483949  |        |           |                                                                                                                                                 |
| 1102 | Sucr | 3 | 221390629 | 140.2263942 | 10 | -0.044839083 | Inside | '34.3'    | grmzm2g066<br>428_t01<br>'transport.amino acids'                                                                                                |
| 1103 | Sucr | 4 | 11976890  | 33.81581685 | 5  | 0.063333379  |        |           |                                                                                                                                                 |
| 1104 | Sucr | 4 | 12389613  | 33.87001839 | 25 | 0.073578644  |        |           |                                                                                                                                                 |
| 1105 | Sucr | 4 | 17655938  | 40.84317673 | 14 | 0.091223346  |        |           |                                                                                                                                                 |
| 1106 | Sucr | 4 | 49286057  | 55.14879543 | 6  | -0.093785941 |        |           |                                                                                                                                                 |
| 1107 | Sucr | 4 | 60649130  | 55.4149908  | 15 | -0.083392435 |        |           |                                                                                                                                                 |
| 1108 | Sucr | 4 | 110959949 | 58.04594151 | 5  | -0.074747404 |        |           |                                                                                                                                                 |
| 1109 | Sucr | 4 | 140704850 | 60.02921307 | 7  | -0.041801329 |        |           |                                                                                                                                                 |
| 1110 | Sucr | 4 | 173809531 | 84.19454361 | 9  | -0.032604677 |        |           |                                                                                                                                                 |
| 1111 | Sucr | 4 | 173813253 | 84.2005901  | 5  | -0.034242183 |        |           |                                                                                                                                                 |
| 1112 | Sucr | 4 | 173813260 | 84.20060147 | 28 | -0.039007994 |        |           |                                                                                                                                                 |
| 1113 | Sucr | 4 | 175615429 | 86.62964208 | 5  | -0.045120538 | Inside | '27.3.3'  | grmzm2g097<br>081_t01<br>'RNA.regulation of<br>transcription.AP2/EREB<br>P, APETALA2/Ethylene-<br>responsive element<br>binding protein family' |
| 1114 | Sucr | 5 | 7403398   | 28.1227481  | 5  | 0.028118305  | Inside | '1.1.1.2' | grmzm2g087<br>435_t01<br>'PS.lightreaction.photosy<br>stem II.PSII polypeptide<br>subunits'                                                     |
| 1115 | Sucr | 5 | 7568984   | 28.7329509  | 5  | 0.03044864   | Inside | '29.4'    | grmzm2g014<br>618_t01<br>'protein.postranslational<br>modification'                                                                             |
| 1116 | Sucr | 5 | 52480298  | 61.27077539 | 9  | 0.075988657  |        |           |                                                                                                                                                 |
| 1117 | Sucr | 5 | 68604010  | 65.0820323  | 8  | 0.067664981  |        |           |                                                                                                                                                 |
| 1118 | Sucr | 5 | 68606903  | 65.08331839 | 14 | 0.085965605  |        |           |                                                                                                                                                 |
| 1119 | Sucr | 5 | 73961139  | 66.43957914 | 7  | -0.05697045  |        |           |                                                                                                                                                 |
| 1120 | Sucr | 5 | 76585969  | 67.18687192 | 15 | -0.06624114  |        |           |                                                                                                                                                 |
| 1121 | Sucr | 5 | 80096521  | 67.90868619 | 6  | -0.061436645 | Inside | '10.6.1'  | grmzm2g482<br>256_t01<br>'cell<br>wall.degradation.cellulas<br>es and beta -1,4-<br>glucanases'                                                 |

|      |      |   |           |             |    |              |        |           |                       |                                                                        |
|------|------|---|-----------|-------------|----|--------------|--------|-----------|-----------------------|------------------------------------------------------------------------|
| 1122 | Sucr | 5 | 173340061 | 84.83341391 | 9  | 0.040041361  | Inside | '26.7'    | grmzm2g339<br>523_t01 | 'misc.oxidases - copper,<br>flavone etc.'                              |
| 1123 | Sucr | 5 | 184390409 | 93.70403371 | 8  | 0.03379498   |        |           |                       |                                                                        |
| 1124 | Sucr | 5 | 184579203 | 93.9214921  | 6  | 0.048528702  |        |           |                       |                                                                        |
| 1125 | Sucr | 5 | 204093596 | 114.9003073 | 8  | 0.029700141  |        |           |                       |                                                                        |
| 1126 | Sucr | 5 | 204527912 | 116.1688529 | 7  | 0.036011734  | Inside | '10.6.1'  | grmzm2g151<br>257_t01 | 'cell<br>wall.degradation.cellulas<br>es and beta -1,4-<br>glucanases' |
| 1127 | Sucr | 6 | 120727054 | 44.61545648 | 5  | -0.053699952 |        |           |                       |                                                                        |
| 1128 | Sucr | 6 | 120956190 | 44.6914035  | 8  | -0.077855121 | Inside | '27.3.99' | grmzm2g405<br>498_t01 | 'RNA.regulation of<br>transcription.unclassified<br>'                  |
| 1129 | Sucr | 6 | 125454322 | 46.41917569 | 67 | -0.070562811 | Inside | '30.3'    | grmzm2g152<br>040_t01 | 'signalling.calcium'                                                   |
| 1130 | Sucr | 6 | 161584484 | 86.71512205 | 10 | -0.089408624 |        |           |                       |                                                                        |
| 1131 | Sucr | 6 | 161899740 | 87.96647854 | 58 | -0.077401595 |        |           |                       |                                                                        |
| 1132 | Sucr | 7 | 2586268   | 7.006474955 | 17 | -0.036400236 | Inside | '33.99'   | grmzm2g341<br>621_t01 | 'development.unspecifie<br>d'                                          |
| 1133 | Sucr | 7 | 3570399   | 12.79412594 | 7  | -0.060608629 |        |           |                       |                                                                        |
| 1134 | Sucr | 7 | 107347438 | 54.26102457 | 17 | -0.042958657 |        |           |                       |                                                                        |
| 1135 | Sucr | 7 | 107748384 | 54.46470141 | 23 | -0.048482794 |        |           |                       |                                                                        |
| 1136 | Sucr | 7 | 112739677 | 57.00023193 | 20 | -0.052798268 |        |           |                       |                                                                        |
| 1137 | Sucr | 7 | 117566293 | 59.45210806 | 8  | -0.045031015 | Inside | '29.5.9'  | grmzm2g095<br>254_t01 | 'protein.degradation.AA<br>A type'                                     |
| 1138 | Sucr | 7 | 140199828 | 78.55767933 | 6  | 0.050727731  |        |           |                       |                                                                        |
| 1139 | Sucr | 7 | 158146806 | 102.5659158 | 5  | -0.076514492 |        |           |                       |                                                                        |
| 1140 | Sucr | 7 | 169562400 | 134.5167655 | 17 | -0.03237163  |        |           |                       |                                                                        |
| 1141 | Sucr | 8 | 163333139 | 94.90114389 | 20 | 0.100296937  |        |           |                       |                                                                        |
| 1142 | Sucr | 8 | 164331901 | 98.88225877 | 17 | 0.036391177  |        |           |                       |                                                                        |
| 1143 | Sucr | 8 | 164401313 | 99.09699982 | 5  | 0.085464891  | Inside | '20.2.99' | grmzm2g114<br>057_t01 | 'stress.abiotic.unspecifie<br>d'                                       |

|      |       |    |           |             |    |              |        |                                        |                                                                  |
|------|-------|----|-----------|-------------|----|--------------|--------|----------------------------------------|------------------------------------------------------------------|
| 1144 | Sucr  | 8  | 164401324 | 99.09703335 | 20 | 0.065104941  | Inside | grmzm2g114<br>'20.2.99' 057_t01        | 'stress.abiotic.unspecific<br>d'                                 |
| 1145 | Sucr  | 8  | 164401576 | 99.09780132 | 7  | 0.074809194  | Inside | grmzm2g114<br>'20.2.99' 057_t01        | 'stress.abiotic.unspecific<br>d'                                 |
| 1146 | Sucr  | 8  | 168628318 | 113.9072651 | 19 | 0.03649192   |        |                                        |                                                                  |
| 1147 | Sucr  | 8  | 172057184 | 128.8248994 | 5  | 0.045679833  | Inside | grmzm2g302<br>'1.1.2.2' 639_t01        | 'PS.lightreaction.photosy<br>stem I.PSI polypeptide<br>subunits' |
| 1148 | Sucr  | 8  | 172057190 | 128.8249236 | 9  | 0.044703695  | Inside | grmzm2g302<br>'1.1.2.2' 639_t01        | 'PS.lightreaction.photosy<br>stem I.PSI polypeptide<br>subunits' |
| 1149 | Sucr  | 10 | 2166827   | 0.955425267 | 15 | -0.093456643 | Inside | grmzm2g127<br>'33.99' 379_t01          | 'development.unspecific<br>d'                                    |
| 1150 | Sucr  | 10 | 2698524   | 2.792564149 | 42 | -0.098765758 |        |                                        |                                                                  |
| 1151 | Sucr  | 10 | 3240557   | 4.665416356 | 5  | -0.076233214 |        |                                        |                                                                  |
| 1152 | Sucr  | 10 | 77488297  | 38.59893808 | 5  | -0.053379979 | Inside | grmzm2g001<br>'20.2.1' 530_t01         | 'stress.abiotic.heat'                                            |
| 1153 | Sucr  | 10 | 85544281  | 40.43156797 | 5  | -0.03474644  | Inside | grmzm2g394<br>'26.12' 500_t01          | 'misc.peroxidases'                                               |
| 1154 | Sucr  | 10 | 113451096 | 45.40733399 | 7  | -0.04402236  |        |                                        |                                                                  |
| 1155 | Prin1 | 1  | 52690146  | 67.43745454 | 28 | -0.325669425 |        |                                        |                                                                  |
| 1156 | Prin1 | 1  | 86713369  | 83.51202829 | 6  | -0.361580066 |        |                                        |                                                                  |
| 1157 | Prin1 | 1  | 89352884  | 84.21946029 | 45 | -0.377779862 |        |                                        |                                                                  |
| 1158 | Prin1 | 1  | 172752341 | 94.00861544 | 12 | 0.251503889  | Inside | '29.5.11. grmzm2g087<br>4.3.2' 608_t01 | 'protein.degradation.ubiq<br>uitin.E3.SCF.FBOX'                  |
| 1159 | Prin1 | 1  | 173107592 | 94.12366453 | 7  | 0.364562902  |        |                                        |                                                                  |



|      |       |   |           |             |    |              |        |           |                       |                                                                                   |
|------|-------|---|-----------|-------------|----|--------------|--------|-----------|-----------------------|-----------------------------------------------------------------------------------|
| 1160 | Prin1 | 1 | 206686287 | 118.8958806 | 6  | -0.243142768 | Inside | '26.10'   | grmzm2g089<br>528_t01 | 'misc.cytochrome P450'                                                            |
| 1161 | Prin1 | 1 | 212358693 | 123.8826126 | 13 | -0.187087297 | Inside | '27.3.27' | grmzm2g152<br>543_t01 | 'RNA.regulation of<br>transcription.NAC<br>domain transcription<br>factor family' |
| 1162 | Prin1 | 1 | 219369577 | 128.5769255 | 8  | -0.230027518 | Inside | '30.2.99' | grmzm2g154<br>114_t01 | 'signalling.receptor<br>kinases.misc'                                             |
| 1163 | Prin1 | 1 | 221341695 | 129.3656668 | 18 | -0.363923496 | Inside | '27.4'    | grmzm2g411<br>041_t01 | 'RNA.RNA binding'                                                                 |
| 1164 | Prin1 | 2 | 2211542   | 4.46960072  | 7  | 0.173420062  | Inside | '30.2.11' | grmzm2g452<br>142_t01 | 'signalling.receptor<br>kinases.leucine rich<br>repeat XI'                        |
| 1165 | Prin1 | 2 | 2211569   | 4.4697226   | 21 | 0.190449042  | Inside | '30.2.11' | grmzm2g452<br>142_t01 | 'signalling.receptor<br>kinases.leucine rich<br>repeat XI'                        |
| 1166 | Prin1 | 2 | 4299945   | 11.96658077 | 43 | 0.175516911  |        |           |                       |                                                                                   |
| 1167 | Prin1 | 2 | 4870077   | 14.13414888 | 6  | 0.185328555  |        |           |                       |                                                                                   |
| 1168 | Prin1 | 2 | 37249730  | 65.55400788 | 27 | 0.483745172  |        |           |                       |                                                                                   |
| 1169 | Prin1 | 2 | 38625981  | 66.45985177 | 6  | 0.393707078  |        |           |                       |                                                                                   |
| 1170 | Prin1 | 2 | 39794143  | 67.22873216 | 23 | 0.5113885    | Inside | '34.3'    | grmzm2g155<br>491_t01 | 'transport.amino acids'                                                           |
| 1171 | Prin1 | 2 | 39879711  | 67.28505273 | 9  | 0.434301435  |        |           |                       |                                                                                   |
| 1172 | Prin1 | 2 | 185284281 | 95.94214858 | 24 | 0.238072478  |        |           |                       |                                                                                   |
| 1173 | Prin1 | 2 | 186269385 | 97.19232631 | 15 | 0.189950055  |        |           |                       |                                                                                   |
| 1174 | Prin1 | 2 | 186285785 | 97.21313925 | 13 | 0.19792386   |        |           |                       |                                                                                   |

|      |       |   |           |             |    |              |        |          |                       |                                                                                |
|------|-------|---|-----------|-------------|----|--------------|--------|----------|-----------------------|--------------------------------------------------------------------------------|
| 1175 | Prin1 | 2 | 186766346 | 97.99944104 | 24 | 0.201406468  | Inside | '27.3.6' | grmzm2g417<br>597_t02 | 'RNA.regulation of<br>transcription.bHLH,Basi<br>c Helix-Loop-Helix<br>family' |
| 1176 | Prin1 | 2 | 187583042 | 99.21938644 | 6  | 0.193767621  |        |          |                       |                                                                                |
| 1177 | Prin1 | 2 | 208604410 | 118.3005988 | 5  | -0.291990669 |        |          |                       |                                                                                |
| 1178 | Prin1 | 3 | 6560146   | 25.42100729 | 9  | 0.224131566  |        |          |                       |                                                                                |
| 1179 | Prin1 | 3 | 10019848  | 34.54290833 | 6  | 0.147532068  |        |          |                       |                                                                                |
| 1180 | Prin1 | 3 | 10798853  | 36.10351096 | 5  | 0.15355804   |        |          |                       |                                                                                |
| 1181 | Prin1 | 3 | 173210277 | 83.47025878 | 7  | 0.372725567  |        |          |                       |                                                                                |
| 1182 | Prin1 | 3 | 176397560 | 87.31080195 | 31 | 0.329494913  |        |          |                       |                                                                                |
| 1183 | Prin1 | 3 | 177498347 | 88.92648807 | 6  | -0.320067184 |        |          |                       |                                                                                |
| 1184 | Prin1 | 3 | 187651158 | 98.71945033 | 7  | -0.295211159 |        |          |                       |                                                                                |
| 1185 | Prin1 | 3 | 208541649 | 118.8197976 | 8  | -0.369019896 |        |          |                       |                                                                                |
| 1186 | Prin1 | 3 | 212248108 | 123.3033736 | 10 | -0.263177037 |        |          |                       |                                                                                |
| 1187 | Prin1 | 3 | 212248700 | 123.3041123 | 16 | -0.250746746 | Inside | '26.28'  | grmzm2g047<br>129_t02 | 'misc.GDSL-motif lipase'                                                       |
| 1188 | Prin1 | 3 | 213848298 | 126.6560335 | 53 | -0.249180593 |        |          |                       |                                                                                |
| 1189 | Prin1 | 3 | 213859916 | 126.6845705 | 6  | -0.219255555 |        |          |                       |                                                                                |
| 1190 | Prin1 | 4 | 31722606  | 50.95098413 | 20 | 0.217083693  |        |          |                       |                                                                                |
| 1191 | Prin1 | 4 | 90652356  | 57.4372722  | 43 | 0.176560253  |        |          |                       |                                                                                |
| 1192 | Prin1 | 4 | 176411838 | 87.58887022 | 6  | -0.223703747 |        |          |                       |                                                                                |
| 1193 | Prin1 | 4 | 176745377 | 87.99059847 | 6  | -0.231675713 | Inside | '12.1.1' | grmzm2g428<br>027_t01 | 'N-metabolism.nitrate<br>metabolism.NR'                                        |
| 1194 | Prin1 | 4 | 177057759 | 88.36684435 | 37 | -0.199910793 |        |          |                       |                                                                                |
| 1195 | Prin1 | 4 | 177225650 | 88.56905925 | 19 | -0.22500953  |        |          |                       |                                                                                |
| 1196 | Prin1 | 4 | 177456322 | 88.84689021 | 5  | -0.177386326 |        |          |                       |                                                                                |
| 1197 | Prin1 | 4 | 243324592 | 133.223033  | 6  | 0.286380697  | Inside | '18.1'   | grmzm2g165<br>966_t01 | 'Co-factor and vitamine<br>metabolism.molybdenum<br>cofactor'                  |
| 1198 | Prin1 | 5 | 1875087   | 2.828866055 | 9  | 0.198422919  |        |          |                       |                                                                                |
| 1199 | Prin1 | 5 | 16786267  | 47.56865354 | 11 | 0.186128131  |        |          |                       |                                                                                |
| 1200 | Prin1 | 5 | 18656090  | 49.4044948  | 5  | 0.231641756  |        |          |                       |                                                                                |
| 1201 | Prin1 | 5 | 19607267  | 50.33047385 | 6  | 0.191852193  | Inside | '34.99'  | grmzm2g124<br>938_t01 | 'transport.misc'                                                               |
| 1202 | Prin1 | 5 | 22228974  | 52.4036044  | 6  | 0.200210132  |        |          |                       |                                                                                |
| 1203 | Prin1 | 5 | 22628739  | 52.93108894 | 19 | 0.179737138  |        |          |                       |                                                                                |

|      |       |   |           |              |    |              |        |           |                                                                                                                                    |
|------|-------|---|-----------|--------------|----|--------------|--------|-----------|------------------------------------------------------------------------------------------------------------------------------------|
| 1204 | Prin1 | 5 | 23032929  | 53.4644122   | 13 | 0.192543992  |        |           |                                                                                                                                    |
| 1205 | Prin1 | 5 | 26723660  | 54.83773092  | 5  | 0.181309457  |        |           |                                                                                                                                    |
| 1206 | Prin1 | 5 | 27926098  | 55.29207074  | 8  | 0.259427803  |        |           |                                                                                                                                    |
| 1207 | Prin1 | 5 | 205662825 | 119.8501543  | 5  | -0.331878313 |        |           |                                                                                                                                    |
| 1208 | Prin1 | 5 | 205892823 | 120.5961956  | 20 | -0.202211883 |        |           |                                                                                                                                    |
| 1209 | Prin1 | 5 | 206470516 | 122.4700502  | 8  | -0.182601165 |        |           |                                                                                                                                    |
| 1210 | Prin1 | 5 | 207093116 | 124.0642086  | 6  | -0.223961036 | Inside | '27.3.3'  | grmzm2g055<br>204_t01<br>'RNA.regulation of transcription.AP2/EREB P, APETALA2/Ethylene-responsive element binding protein family' |
| 1211 | Prin1 | 5 | 207103724 | 124.0880847  | 6  | -0.211548066 | Inside | '3.2.2'   | grmzm2g055<br>150_t01<br>'minor CHO metabolism.trehalose.TP P'                                                                     |
| 1212 | Prin1 | 5 | 207325275 | 124.5867434  | 7  | -0.207443465 |        |           |                                                                                                                                    |
| 1213 | Prin1 | 6 | 2898813   | -7.559855335 | 7  | -0.16547695  |        |           |                                                                                                                                    |
| 1214 | Prin1 | 6 | 5873783   | -4.184534568 | 14 | -0.194407963 |        |           |                                                                                                                                    |
| 1215 | Prin1 | 6 | 6894842   | -3.026068551 | 14 | -0.172667028 |        |           |                                                                                                                                    |
| 1216 | Prin1 | 6 | 8419109   | -1.296676302 | 10 | -0.156917082 | Inside | '33.99'   | grmzm2g061<br>186_t01<br>'development.unspecific d'                                                                                |
| 1217 | Prin1 | 6 | 14792950  | 5.295348837  | 11 | -0.186212199 |        |           |                                                                                                                                    |
| 1218 | Prin1 | 7 | 124476542 | 64.75250337  | 10 | 0.249817163  |        |           |                                                                                                                                    |
| 1219 | Prin1 | 7 | 153457755 | 93.06309404  | 13 | 0.245403     |        |           |                                                                                                                                    |
| 1220 | Prin1 | 7 | 156111925 | 98.3472492   | 7  | 0.241907825  |        |           |                                                                                                                                    |
| 1221 | Prin1 | 7 | 156185170 | 98.49909898  | 33 | 0.211508581  |        |           |                                                                                                                                    |
| 1222 | Prin1 | 7 | 159147927 | 104.6414159  | 9  | 0.180017249  | Inside | '10.8.1'  | grmzm2g037<br>411_t01<br>'cell wall.pectin*esterases.PME'                                                                          |
| 1223 | Prin1 | 7 | 159471791 | 105.3360113  | 5  | 0.203425704  | Inside | '27.3.21' | grmzm2g169<br>636_t01<br>'RNA.regulation of transcription.GRAS transcription factor family'                                        |
| 1224 | Prin1 | 7 | 159471845 | 105.3361463  | 9  | 0.171827824  | Inside | '27.3.21' | grmzm2g169<br>636_t01<br>'RNA.regulation of transcription.GRAS transcription factor family'                                        |
| 1225 | Prin1 | 7 | 160106822 | 106.9228459  | 9  | 0.206135369  |        |           |                                                                                                                                    |

|      |       |   |           |             |    |              |        |           |                                                                                                   |
|------|-------|---|-----------|-------------|----|--------------|--------|-----------|---------------------------------------------------------------------------------------------------|
| 1226 | Prin1 | 7 | 169415919 | 134.4048149 | 10 | -0.207507404 |        |           |                                                                                                   |
| 1227 | Prin1 | 8 | 2087948   | 4.782267599 | 7  | 0.209648655  |        |           |                                                                                                   |
| 1228 | Prin1 | 8 | 4386420   | 11.24086841 | 11 | 0.365945724  |        |           |                                                                                                   |
| 1229 | Prin1 | 8 | 5283586   | 15.55733838 | 38 | 0.216233202  | Inside | '10.8.1'  | grmzm2g017<br>555_t01<br>'cell<br>wall.pectin*esterases.PM<br>E'                                  |
| 1230 | Prin1 | 8 | 8255624   | 20.95732171 | 5  | 0.182206933  | Inside | '27.3.67' | ac234160.1_f<br>gt001<br>'RNA.regulation of<br>transcription.putative<br>transcription regulator' |
| 1231 | Prin1 | 8 | 8403455   | 21.19881565 | 12 | 0.37507853   |        |           |                                                                                                   |
| 1232 | Prin1 | 8 | 103054530 | 58.74182186 | 7  | 0.277385271  | Inside | '26.10'   | grmzm2g096<br>029_t01<br>'misc.cytochrome P450'                                                   |
| 1233 | Prin1 | 8 | 105711842 | 59.67074769 | 21 | 0.237102288  |        |           |                                                                                                   |
| 1234 | Prin1 | 8 | 108389110 | 60.44924097 | 8  | 0.215129664  |        |           |                                                                                                   |
| 1235 | Prin1 | 8 | 108849125 | 60.58213104 | 19 | 0.325050069  | Inside | '30.5'    | grmzm2g072<br>089_t01<br>'signalling.G-proteins'                                                  |
| 1236 | Prin1 | 8 | 111264320 | 61.27983748 | 5  | 0.202557625  |        |           |                                                                                                   |
| 1237 | Prin1 | 8 | 117142297 | 63.44621372 | 6  | 0.231321611  |        |           |                                                                                                   |
| 1238 | Prin1 | 8 | 117976115 | 63.86193872 | 6  | 0.224320933  |        |           |                                                                                                   |
| 1239 | Prin1 | 8 | 158510179 | 86.58550567 | 14 | -0.190411215 |        |           |                                                                                                   |
| 1240 | Prin1 | 8 | 158697511 | 86.89047423 | 5  | -0.249857512 |        |           |                                                                                                   |
| 1241 | Prin1 | 8 | 159893599 | 88.49652739 | 21 | -0.181876531 |        |           |                                                                                                   |
| 1242 | Prin1 | 8 | 159898572 | 88.50016935 | 13 | -0.17950465  | Inside | '27.3.99' | grmzm2g461<br>793_t01<br>'RNA.regulation of<br>transcription.unclassified<br>'                    |
| 1243 | Prin1 | 8 | 162773842 | 93.15571435 | 5  | -0.176464664 |        |           |                                                                                                   |
| 1244 | Prin1 | 9 | 12785133  | 22.10483847 | 6  | -0.158858265 |        |           |                                                                                                   |
| 1245 | Prin1 | 9 | 20668779  | 36.70158796 | 15 | -0.209803433 |        |           |                                                                                                   |
| 1246 | Prin1 | 9 | 20780641  | 36.88056228 | 5  | -0.183329952 |        |           |                                                                                                   |
| 1247 | Prin1 | 9 | 21433294  | 37.9247786  | 11 | -0.168662562 |        |           |                                                                                                   |
| 1248 | Prin1 | 9 | 26434264  | 43.26084016 | 8  | -0.174249746 |        |           |                                                                                                   |
| 1249 | Prin1 | 9 | 34855540  | 44.99799089 | 6  | -0.212168913 |        |           |                                                                                                   |

|      |       |    |           |             |    |              |        |           |                       |                                                                                       |
|------|-------|----|-----------|-------------|----|--------------|--------|-----------|-----------------------|---------------------------------------------------------------------------------------|
| 1250 | Prin1 | 9  | 113108447 | 55.8821261  | 7  | -0.307295112 | Inside | '10.7'    | grmzm2g073<br>260_t01 | 'cell wall.modification'                                                              |
| 1251 | Prin1 | 9  | 144471186 | 92.93120956 | 15 | -0.279214676 |        |           |                       |                                                                                       |
| 1252 | Prin1 | 9  | 144622187 | 93.27205089 | 19 | -0.236362959 |        |           |                       |                                                                                       |
| 1253 | Prin1 | 9  | 146785494 | 99.6308883  | 11 | -0.180210179 |        |           |                       |                                                                                       |
| 1254 | Prin1 | 10 | 3622484   | 6.02423381  | 5  | 0.18783093   |        |           |                       |                                                                                       |
| 1255 | Prin1 | 10 | 119575302 | 47.38384118 | 12 | -0.204463112 |        |           |                       |                                                                                       |
| 1256 | Prin1 | 10 | 137172137 | 64.52401076 | 13 | 0.291125843  |        |           |                       |                                                                                       |
| 1257 | Prin1 | 10 | 140585346 | 71.90932116 | 6  | 0.416795748  |        |           |                       |                                                                                       |
| 1258 | Prin2 | 1  | 16528334  | 33.09583561 | 9  | -0.148363759 |        |           |                       |                                                                                       |
| 1259 | Prin2 | 1  | 16774678  | 33.28332749 | 16 | -0.148531763 | Inside | '11.1.10' | grmzm2g445<br>602_t01 | 'lipid metabolism.FA<br>synthesis and FA<br>elongation.beta ketoacyl<br>CoA synthase' |
| 1260 | Prin2 | 1  | 17321663  | 33.69438463 | 6  | -0.167753428 |        |           |                       |                                                                                       |
| 1261 | Prin2 | 1  | 21383024  | 37.73112289 | 14 | -0.220900957 |        |           |                       |                                                                                       |
| 1262 | Prin2 | 1  | 21688795  | 38.19316881 | 19 | -0.158781748 |        |           |                       |                                                                                       |
| 1263 | Prin2 | 1  | 21725760  | 38.25596337 | 8  | -0.160463885 |        |           |                       |                                                                                       |
| 1264 | Prin2 | 1  | 46712396  | 62.60179969 | 12 | 0.205604085  | Inside | '31.1'    | grmzm2g104<br>534_t01 | 'cell.organisation'                                                                   |
| 1265 | Prin2 | 1  | 46752724  | 62.62839403 | 29 | 0.217392494  |        |           |                       |                                                                                       |
| 1266 | Prin2 | 1  | 48772229  | 63.96015846 | 7  | 0.183706966  |        |           |                       |                                                                                       |
| 1267 | Prin2 | 1  | 51413724  | 65.71798167 | 16 | 0.162964157  |        |           |                       |                                                                                       |
| 1268 | Prin2 | 1  | 51506627  | 65.97678122 | 7  | 0.17642016   |        |           |                       |                                                                                       |
| 1269 | Prin2 | 1  | 92753447  | 85.57176721 | 27 | 0.151936909  |        |           |                       |                                                                                       |
| 1270 | Prin2 | 1  | 228544370 | 135.6950109 | 18 | -0.296287834 | Inside | '31.1'    | grmzm2g113<br>202_t01 | 'cell.organisation'                                                                   |
| 1271 | Prin2 | 1  | 229356638 | 136.3156268 | 6  | -0.360908732 |        |           |                       |                                                                                       |
| 1272 | Prin2 | 1  | 241747994 | 142.5070084 | 6  | -0.352944427 |        |           |                       |                                                                                       |
| 1273 | Prin2 | 1  | 244977165 | 144.1767876 | 5  | -0.366739502 | Inside | '34.15'   | grmzm2g438<br>960_t01 | 'transport.potassium'                                                                 |
| 1274 | Prin2 | 1  | 245007633 | 144.1925424 | 9  | -0.295276804 |        |           |                       |                                                                                       |
| 1275 | Prin2 | 1  | 252877501 | 149.8251302 | 6  | -0.308540541 |        |           |                       |                                                                                       |
| 1276 | Prin2 | 1  | 253031255 | 149.9489621 | 5  | -0.279689196 |        |           |                       |                                                                                       |
| 1277 | Prin2 | 1  | 253328929 | 150.1887057 | 6  | -0.305359506 |        |           |                       |                                                                                       |
| 1278 | Prin2 | 2  | 4879221   | 14.16891319 | 10 | -0.178554558 |        |           |                       |                                                                                       |

|            |   |           |             |    |              |        |          |                                                                                                 |
|------------|---|-----------|-------------|----|--------------|--------|----------|-------------------------------------------------------------------------------------------------|
| 1279 Prin2 | 2 | 5548572   | 16.71369911 | 43 | -0.154491728 |        |          |                                                                                                 |
| 1280 Prin2 | 2 | 5682220   | 17.22181151 | 5  | -0.156996321 |        |          |                                                                                                 |
| 1281 Prin2 | 2 | 26641159  | 57.94684499 | 18 | -0.149499019 |        |          |                                                                                                 |
| 1282 Prin2 | 2 | 27916738  | 59.06362357 | 30 | -0.172361155 |        |          |                                                                                                 |
| 1283 Prin2 | 2 | 28972476  | 60.59406358 | 25 | -0.235153714 |        |          |                                                                                                 |
| 1284 Prin2 | 2 | 34001062  | 63.56397414 | 13 | -0.186467942 | Inside | '20.1'   | grmzm2g051<br>943_t01 'stress.biotic'                                                           |
| 1285 Prin2 | 2 | 34937097  | 64.04660572 | 9  | 0.335345874  | Inside | '29.5.9' | grmzm2g138 'protein.degradation.AA<br>770_t01 A type'                                           |
| 1286 Prin2 | 2 | 81996078  | 75.87752354 | 6  | -0.253830438 |        |          |                                                                                                 |
| 1287 Prin2 | 2 | 124738310 | 77.33837071 | 9  | -0.276512367 |        |          |                                                                                                 |
| 1288 Prin2 | 2 | 124769416 | 77.34049122 | 25 | -0.297074114 |        |          |                                                                                                 |
| 1289 Prin2 | 3 | 2915029   | 8.667233227 | 5  | -0.195341132 | Inside | '17.2.3' | 'hormone<br>metabolism.auxin.induce<br>grmzm2g060 d-regulated-responsive-<br>991_t01 activated' |
| 1290 Prin2 | 3 | 3185414   | 10.0663659  | 10 | -0.231447784 |        |          |                                                                                                 |
| 1291 Prin2 | 3 | 3386685   | 11.10786166 | 18 | -0.158579918 | Inside | '26.28'  | grmzm2g400<br>929_t01 'misc.GDSL-motif lipase'                                                  |
| 1292 Prin2 | 3 | 10750451  | 36.00654587 | 9  | -0.164241331 | Inside | '34.18'  | grmzm2g051 'transport.unspecified<br>753_t01 anions'                                            |
| 1293 Prin2 | 3 | 10838771  | 36.18347982 | 6  | -0.116432701 |        |          |                                                                                                 |
| 1294 Prin2 | 3 | 13300926  | 40.11756205 | 6  | -0.186344905 |        |          |                                                                                                 |
| 1295 Prin2 | 3 | 13633702  | 40.54785389 | 18 | -0.163225589 |        |          |                                                                                                 |
| 1296 Prin2 | 3 | 13634126  | 40.54840214 | 12 | -0.167661347 |        |          |                                                                                                 |
| 1297 Prin2 | 3 | 14416721  | 41.56032683 | 26 | -0.182957628 |        |          |                                                                                                 |
| 1298 Prin2 | 3 | 17306447  | 45.29685092 | 9  | -0.237524461 | Inside | '15.2'   | grmzm2g099 'metal handling.binding,<br>340_t01 chelation and storage'                           |
| 1299 Prin2 | 3 | 19698629  | 48.39003196 | 8  | -0.195530153 |        |          |                                                                                                 |
| 1300 Prin2 | 3 | 19800505  | 48.52176145 | 5  | -0.198444438 |        |          |                                                                                                 |
| 1301 Prin2 | 3 | 51981075  | 56.79858368 | 23 | 0.417597478  |        |          |                                                                                                 |

|            |   |           |             |    |              |        |                 |                                                                                                                    |
|------------|---|-----------|-------------|----|--------------|--------|-----------------|--------------------------------------------------------------------------------------------------------------------|
| 1302 Prin2 | 3 | 54021465  | 57.26319567 | 17 | 0.319862133  |        |                 |                                                                                                                    |
| 1303 Prin2 | 3 | 106489882 | 58.60975416 | 5  | 0.31895293   |        |                 |                                                                                                                    |
| 1304 Prin2 | 3 | 136646099 | 63.07155567 | 5  | -0.237479608 | Inside | '29.4'          | grmzm2g010 'protein.postranslational<br>775_t01 modification'                                                      |
| 1305 Prin2 | 3 | 171862276 | 82.33409418 | 6  | 0.513407834  |        |                 |                                                                                                                    |
| 1306 Prin2 | 3 | 172148591 | 82.5754152  | 5  | 0.518185895  |        |                 |                                                                                                                    |
| 1307 Prin2 | 3 | 173219900 | 83.47836954 | 15 | 0.538906436  |        |                 |                                                                                                                    |
| 1308 Prin2 | 3 | 193922818 | 101.9299488 | 10 | 0.197939448  |        |                 |                                                                                                                    |
| 1309 Prin2 | 3 | 198668625 | 105.7679086 | 5  | 0.17551164   |        |                 |                                                                                                                    |
| 1310 Prin2 | 4 | 828147    | 2.931410178 | 7  | 0.187879628  | Inside | '27.3.21'       | grmzm2g073 'RNA.regulation of<br>823_t01 transcription.GRAS<br>transcription factor<br>family'                     |
| 1311 Prin2 | 4 | 5696047   | 19.49225268 | 12 | -0.299402936 |        |                 |                                                                                                                    |
| 1312 Prin2 | 4 | 42018416  | 54.27865297 | 7  | -0.145631996 |        |                 |                                                                                                                    |
| 1313 Prin2 | 4 | 96251735  | 57.74714448 | 7  | -0.124855363 |        |                 |                                                                                                                    |
| 1314 Prin2 | 4 | 125186338 | 58.42286198 | 72 | -0.130712371 |        |                 |                                                                                                                    |
| 1315 Prin2 | 4 | 177668855 | 89.1123214  | 6  | -0.18872756  |        |                 |                                                                                                                    |
| 1316 Prin2 | 4 | 199778387 | 105.9507817 | 14 | -0.193006416 |        |                 |                                                                                                                    |
| 1317 Prin2 | 4 | 242574395 | 130.3125709 | 11 | -0.281573519 |        |                 |                                                                                                                    |
| 1318 Prin2 | 5 | 929964    | 0.282533564 | 43 | -0.19293743  |        |                 |                                                                                                                    |
| 1319 Prin2 | 5 | 1574000   | 2.018545222 | 10 | -0.231021725 |        |                 |                                                                                                                    |
| 1320 Prin2 | 5 | 1580722   | 2.036636261 | 5  | -0.228448538 | Inside | '33.99'         | ac202974.3_f 'development.unspecifie<br>gt004 d'                                                                   |
| 1321 Prin2 | 5 | 1842198   | 2.740351301 | 7  | -0.153703207 | Inside | '20.2.1'        | grmzm2g138<br>511_t01 'stress.abiotic.heat'                                                                        |
| 1322 Prin2 | 5 | 2347751   | 4.958870956 | 12 | -0.152516959 | Inside | '27.3.8'        | grmzm2g144 'RNA.regulation of<br>188_t01 transcription.C2C2(Zn)<br>DOF zinc finger family'                         |
| 1323 Prin2 | 5 | 7094245   | 26.093099   | 26 | 0.150251126  |        |                 |                                                                                                                    |
| 1324 Prin2 | 5 | 10372835  | 33.33515135 | 9  | 0.176034799  | Inside | '29.4.1.5<br>7' | grmzm2g158 'protein.postranslational<br>359_t01 modification.kinase.rece<br>ptor like cytoplasmatic<br>kinase VII' |
| 1325 Prin2 | 5 | 26734713  | 54.84190728 | 11 | 0.353426391  |        |                 |                                                                                                                    |
| 1326 Prin2 | 5 | 73804215  | 66.39516104 | 21 | 0.292651485  |        |                 |                                                                                                                    |
| 1327 Prin2 | 5 | 108262797 | 70.32363616 | 14 | 0.366236504  |        |                 |                                                                                                                    |

|      |       |   |           |              |    |              |        |                       |                                                                                                          |
|------|-------|---|-----------|--------------|----|--------------|--------|-----------------------|----------------------------------------------------------------------------------------------------------|
| 1328 | Prin2 | 5 | 143236820 | 72.10704824  | 7  | 0.356617661  | Inside | grmzm2g158            | 'RNA.regulation of transcription.bZIP transcription factor family'                                       |
| 1329 | Prin2 | 5 | 164299446 | 76.94625198  | 6  | -0.300410103 |        | '27.3.35' 313_t01     |                                                                                                          |
| 1330 | Prin2 | 5 | 165991682 | 78.08035909  | 12 | 0.301900822  |        |                       |                                                                                                          |
| 1331 | Prin2 | 5 | 169382477 | 81.27535729  | 5  | -0.317414291 |        |                       |                                                                                                          |
| 1332 | Prin2 | 5 | 188788930 | 98.54955746  | 8  | 0.15465899   |        |                       |                                                                                                          |
| 1333 | Prin2 | 5 | 194052252 | 102.6015186  | 6  | 0.184420996  |        |                       |                                                                                                          |
| 1334 | Prin2 | 5 | 203652758 | 113.8406769  | 6  | 0.258309313  |        |                       |                                                                                                          |
| 1335 | Prin2 | 5 | 205472185 | 119.231778   | 50 | 0.148970386  | Inside | grmzm2g053            | 'protein.degradation.ubiquitin.E3.RING'                                                                  |
| 1336 | Prin2 | 5 | 207751210 | 125.7483283  | 10 | 0.22159592   |        | '29.5.11.4.2' 303_t01 |                                                                                                          |
| 1337 | Prin2 | 5 | 209217720 | 128.3485035  | 30 | 0.293163871  |        |                       |                                                                                                          |
| 1338 | Prin2 | 5 | 209930161 | 130.9277607  | 5  | 0.227274598  |        |                       |                                                                                                          |
| 1339 | Prin2 | 6 | 867384    | -9.864659918 | 6  | 0.365645779  |        |                       |                                                                                                          |
| 1340 | Prin2 | 6 | 1957524   | -8.627816461 | 8  | 0.454475095  |        |                       |                                                                                                          |
| 1341 | Prin2 | 6 | 118739798 | 43.69898027  | 13 | -0.578903834 |        |                       |                                                                                                          |
| 1342 | Prin2 | 6 | 119772986 | 44.24786955  | 73 | -0.412080895 |        |                       |                                                                                                          |
| 1343 | Prin2 | 6 | 120956190 | 44.6914035   | 7  | -0.327835409 | Inside | grmzm2g405            | 'RNA.regulation of transcription.unclassified'                                                           |
| 1344 | Prin2 | 6 | 165586711 | 102.9473046  | 27 | -0.297375391 |        | '27.3.99' 498_t01     |                                                                                                          |
| 1345 | Prin2 | 6 | 165589669 | 102.9571143  | 8  | -0.289894217 |        |                       |                                                                                                          |
| 1346 | Prin2 | 6 | 165667455 | 103.215079   | 20 | -0.261489914 |        |                       |                                                                                                          |
| 1347 | Prin2 | 6 | 165667652 | 103.2157324  | 5  | -0.237252512 |        |                       |                                                                                                          |
| 1348 | Prin2 | 6 | 166076222 | 104.570689   | 13 | -0.302483541 |        |                       |                                                                                                          |
| 1349 | Prin2 | 7 | 5428540   | 23.50772999  | 34 | -0.287429645 |        |                       |                                                                                                          |
| 1350 | Prin2 | 7 | 22002213  | 45.79983088  | 10 | -0.179913126 | Inside | grmzm2g176            | 'RNA.regulation of transcription.AP2/EREBP, APETALA2/Ethylene-responsive element binding protein family' |
| 1351 | Prin2 | 7 | 27302170  | 46.77471414  | 16 | -0.174347347 |        | '27.3.3' 175_t01      |                                                                                                          |
| 1352 | Prin2 | 7 | 27327128  | 46.7793044   | 9  | -0.205664769 | Inside | grmzm2g156            | 'transport.peptides and oligopeptides'                                                                   |
| 1353 | Prin2 | 7 | 29146881  | 47.11399196  | 45 | -0.189498059 |        | '34.13' 794_t01       |                                                                                                          |



|            |   |           |              |    |              |        |           |                                                             |
|------------|---|-----------|--------------|----|--------------|--------|-----------|-------------------------------------------------------------|
| 1354 Prin2 | 7 | 124223168 | 64.44761155  | 10 | -0.142549038 |        |           |                                                             |
| 1355 Prin2 | 7 | 156185236 | 98.49923581  | 6  | -0.608676503 |        |           |                                                             |
| 1356 Prin2 | 7 | 156689760 | 99.54520289  | 27 | -0.178439732 |        |           |                                                             |
| 1357 Prin2 | 7 | 166657242 | 123.8438631  | 41 | 0.243268708  |        |           |                                                             |
| 1358 Prin2 | 7 | 167223656 | 126.3055595  | 17 | 0.239027751  |        |           |                                                             |
| 1359 Prin2 | 7 | 168146779 | 130.3175518  | 8  | 0.250707874  | Inside | '27.3.20' | ac155434.2_f transcription factor family, GARP              |
| 1360 Prin2 | 7 | 168157307 | 130.3633076  | 7  | 0.263440613  | Inside | '27.3.8'  | ac155434.2_f transcription.C2C2(Zn) DOF zinc finger family' |
| 1361 Prin2 | 8 | 10739260  | 27.73471036  | 6  | -0.202260838 |        |           |                                                             |
| 1362 Prin2 | 8 | 103399576 | 58.8624408   | 6  | 0.15144341   |        |           |                                                             |
| 1363 Prin2 | 8 | 159090160 | 87.53999331  | 9  | 0.172388561  |        |           |                                                             |
| 1364 Prin2 | 8 | 160611990 | 89.64768912  | 20 | 0.195427349  |        |           |                                                             |
| 1365 Prin2 | 8 | 160612122 | 89.6479463   | 28 | 0.216705415  |        |           |                                                             |
| 1366 Prin2 | 8 | 164575465 | 99.62773322  | 5  | 0.134691981  | Inside | '34.99'   | grmzm2g033 649_t01 'transport.misc'                         |
| 1367 Prin2 | 8 | 170618195 | 123.1071582  | 8  | 0.141301951  |        |           |                                                             |
| 1368 Prin2 | 8 | 170786240 | 123.7938509  | 6  | 0.133385539  |        |           |                                                             |
| 1369 Prin2 | 8 | 173793234 | 135.8235771  | 8  | 0.119843765  | Inside | '1.5.1'   | grmzm2g118 770_t01 'PS.carbon concentrating mechanism.C4'   |
| 1370 Prin2 | 8 | 173864083 | 136.1091964  | 9  | 0.124329055  |        |           |                                                             |
| 1371 Prin2 | 9 | 2701441   | -3.388186607 | 59 | -0.379560098 | Inside | '27.3.20' | grmzm2g026 transcription factor family, GARP                |
| 1372 Prin2 | 9 | 3689306   | -0.719907238 | 18 | -0.378505593 |        |           |                                                             |
| 1373 Prin2 | 9 | 7182819   | 8.716269429  | 14 | -0.268943698 |        |           |                                                             |
| 1374 Prin2 | 9 | 109417983 | 53.84202072  | 8  | 0.254711069  |        |           |                                                             |
| 1375 Prin2 | 9 | 109658976 | 53.91939367  | 7  | 0.188444788  |        |           |                                                             |
| 1376 Prin2 | 9 | 117715320 | 57.64391617  | 6  | 0.137706712  |        |           |                                                             |
| 1377 Prin2 | 9 | 138570437 | 79.39501909  | 34 | 0.310626673  | Inside | '20.1'    | grmzm2g149 798_t01 'stress.biotic'                          |

|      |       |    |           |             |    |              |        |           |            |         |                                                                      |
|------|-------|----|-----------|-------------|----|--------------|--------|-----------|------------|---------|----------------------------------------------------------------------|
| 1378 | Prin2 | 10 | 5058530   | 14.79019912 | 46 | -0.424128374 | Inside | '27.3.35' | grmzm2g366 | 264_t01 | 'RNA.regulation of transcription.bZIP transcription factor family'   |
| 1379 | Prin2 | 10 | 5427445   | 17.07840286 | 12 | -0.377394519 |        |           |            |         |                                                                      |
| 1380 | Prin2 | 10 | 6191195   | 21.4060557  | 6  | -0.359938003 | Inside | '27.3.18' | grmzm2g052 | 515_t01 | 'RNA.regulation of transcription.E2F/DP transcription factor family' |
| 1381 | Prin2 | 10 | 9023970   | 24.98301526 | 9  | -0.188824159 |        |           |            |         |                                                                      |
| 1382 | Prin2 | 10 | 22382517  | 34.8358978  | 9  | 0.185011049  |        |           |            |         |                                                                      |
| 1383 | Prin2 | 10 | 24154443  | 35.31258248 | 6  | 0.360806077  |        |           |            |         |                                                                      |
| 1384 | Prin2 | 10 | 79797589  | 39.13112595 | 6  | 0.260220052  |        |           |            |         |                                                                      |
| 1385 | Prin2 | 10 | 85540940  | 40.43084945 | 25 | 0.314408789  |        |           |            |         |                                                                      |
| 1386 | Prin2 | 10 | 86726870  | 40.71912634 | 15 | 0.304643229  |        |           |            |         |                                                                      |
| 1387 | Prin2 | 10 | 113194309 | 45.32268893 | 8  | 0.36996183   | Inside | '27.1'    | grmzm2g158 | 300_t01 | 'RNA.processing'                                                     |
| 1388 | Prin2 | 10 | 133029713 | 57.10017332 | 5  | -0.138816574 |        |           |            |         |                                                                      |
| 1389 | Prin2 | 10 | 142607850 | 78.31225962 | 6  | -0.114292892 |        |           |            |         |                                                                      |
| 1390 | Prin2 | 10 | 142607858 | 78.31228969 | 7  | -0.146722504 |        |           |            |         |                                                                      |
| 1391 | Prin2 | 10 | 142646940 | 78.45920294 | 5  | -0.242947614 |        |           |            |         |                                                                      |
| 1392 | Prin2 | 10 | 143724295 | 81.34148153 | 8  | -0.154720679 | Inside | '30.2.24' | grmzm2g000 | 620_t01 | 'signalling.receptor kinases.S-locus glycoprotein like'              |
| 1393 | Prin2 | 10 | 144247405 | 82.22431479 | 10 | -0.222878534 |        |           |            |         |                                                                      |
| 1394 | Prin2 | 10 | 144605053 | 83.42035782 | 8  | -0.228222027 |        |           |            |         |                                                                      |

| Significant SNP Information |       |     |                           |                       |                                      |                    |                  |               |                    |                            |
|-----------------------------|-------|-----|---------------------------|-----------------------|--------------------------------------|--------------------|------------------|---------------|--------------------|----------------------------|
| SNP No.                     | Trait | Chr | Physical Position (AGPv1) | Imputed cM on NAM Map | Resample Model Inclusion Probability | Average SNP effect | Distance to Gene | Bincode       | Gene ID            | Category                   |
| 1                           | AA    | 1   | 13935133                  | 28.26096353           |                                      | 26                 | -0.085551628     | -2201 '33.99' | grmzm2g123 986_t01 | 'development.unspecific d' |

|       |   |           |             |    |              |                  |                       |                                                                                       |
|-------|---|-----------|-------------|----|--------------|------------------|-----------------------|---------------------------------------------------------------------------------------|
| 2 AA  | 1 | 16780363  | 33.28759975 | 31 | -0.081912456 | -4386 '11.1.10'  | grmzm2g445<br>602_t01 | 'lipid metabolism.FA<br>synthesis and FA<br>elongation.beta ketoacyl<br>CoA synthase' |
| 3 AA  | 1 | 33393305  | 52.652275   | 11 | 0.097059759  | -1430 '34.3'     | grmzm2g149<br>481_t04 | 'transport.amino acids'                                                               |
| 4 AA  | 1 | 165885858 | 91.92724657 | 9  | 0.091736639  | -410789 '26.7'   | grmzm2g369<br>987_t01 | 'misc.oxidases - copper,<br>flavone etc.'                                             |
| 5 AA  | 1 | 177389147 | 95.59351325 | 20 | -0.098789746 | -376086 '29.2.4' | ac199908.4_f<br>gt002 | 'protein.synthesis.elongat<br>ion'                                                    |
| 6 AA  | 1 | 182391497 | 97.70267302 | 18 | -0.094955313 | -2273 '27.4'     | grmzm2g110<br>143_t01 | 'RNA.RNA binding'                                                                     |
| 7 AA  | 1 | 192608853 | 106.1391166 | 12 | -0.107384883 | -239795 '27.3'   | grmzm2g179<br>366_t01 | 'RNA.regulation of<br>transcription'                                                  |
| 8 AA  | 1 | 205585447 | 117.8354213 | 6  | -0.061343453 | -35648 '27.3.11' | grmzm2g179<br>677_t01 | 'RNA.regulation of<br>transcription.C2H2 zinc<br>finger family'                       |
| 9 AA  | 1 | 205728648 | 117.9733694 | 10 | -0.053004958 | -101444 '25.9'   | grmzm2g095<br>579_t01 | 'C1-<br>metabolism.dihydroneop<br>terin aldolase'                                     |
| 10 AA | 1 | 207120770 | 119.3144261 | 15 | -0.061520606 | -97318 '7.1.2'   | grmzm2g122<br>126_t01 | 'OPP.oxidative PP.6-<br>phosphogluconolactonas<br>e'                                  |

|       |   |           |             |    |              |                  |                       |                                                                             |
|-------|---|-----------|-------------|----|--------------|------------------|-----------------------|-----------------------------------------------------------------------------|
| 11 AA | 1 | 207135155 | 119.3282834 | 8  | -0.073649634 | -11302 '17.4.1'  | grmzm2g348<br>452_t01 | 'hormone<br>metabolism.cytokinin.synthesis-degradation'                     |
| 12 AA | 1 | 208348395 | 120.4695879 | 10 | -0.053930899 | -3872 '33.99'    | grmzm2g125<br>557_t01 | 'development.unspecified'                                                   |
| 13 AA | 1 | 210147485 | 121.9613779 | 9  | -0.073635914 | -69318 '3.2.3'   | grmzm2g079<br>928_t01 | 'minor CHO<br>metabolism.trehalose.potential TPS/TPP'                       |
| 14 AA | 1 | 211910691 | 123.4234132 | 9  | -0.087541648 | -5087 '4.2.4'    | grmzm2g139<br>360_t01 | 'glycolysis.plastid<br>branch.phosphofruktokinase (PFK)'                    |
| 15 AA | 1 | 218527234 | 128.2400336 | 6  | -0.056062356 | -63498 '34.99'   | grmzm2g115<br>635_t01 | 'transport.misc'                                                            |
| 16 AA | 2 | 3369867   | 8.460233144 | 8  | 0.081076721  | -9429 '31.3'     | grmzm2g047<br>590_t03 | 'cell.cycle'                                                                |
| 17 AA | 2 | 4452933   | 12.54822136 | 11 | 0.119133386  | -94242 '30.2.17' | grmzm2g363<br>066_t01 | 'signalling.receptor<br>kinases.DUF 26'                                     |
| 18 AA | 2 | 5461777   | 16.38371574 | 10 | 0.080146925  | -80220 '30.2.3'  | grmzm2g055<br>844_t01 | 'signalling.receptor<br>kinases.leucine rich<br>repeat III'                 |
| 19 AA | 2 | 6695031   | 20.19476759 | 27 | 0.044923744  | -14118 '27.3.35' | grmzm2g131<br>961_t01 | 'RNA.regulation of<br>transcription.bZIP<br>transcription factor<br>family' |

|       |   |           |             |    |             |                       |                       |                                                                                                                        |
|-------|---|-----------|-------------|----|-------------|-----------------------|-----------------------|------------------------------------------------------------------------------------------------------------------------|
| 20 AA | 2 | 10533238  | 30.11324699 | 5  | 0.050106955 | -11750 '16.1.5'       | grmzm2g049<br>538_t01 | 'secondary<br>metabolism.isoprenoids.t<br>erpenoids'                                                                   |
| 21 AA | 2 | 11104224  | 31.84202766 | 21 | 0.071319845 | -387 '29.4'           | grmzm2g102<br>088_t02 | 'protein.postranslational<br>modification'                                                                             |
| 22 AA | 2 | 13443804  | 37.94791551 | 22 | 0.054661567 | -65666 '28.1'         | ac195235.3_f<br>gt003 | 'DNA.synthesis/chromati<br>n structure'                                                                                |
| 23 AA | 2 | 20521754  | 51.29525101 | 5  | 0.086430763 | -37267 '27.3.3'       | grmzm2g475<br>678_t01 | 'RNA.regulation of<br>transcription.AP2/EREB<br>P, APETALA2/Ethylene-<br>responsive element<br>binding protein family' |
| 24 AA | 2 | 24175937  | 56.21986729 | 6  | 0.144114822 | -214799 '31.2'        | grmzm2g124<br>371_t01 | 'cell.division'                                                                                                        |
| 25 AA | 2 | 37317423  | 65.59856319 | 51 | 0.074663447 | '29.5.11.<br>-6501 1' | grmzm2g045<br>117_t01 | 'protein.degradation.ubiq<br>uitin.ubiquitin'                                                                          |
| 26 AA | 2 | 186765375 | 97.99753568 | 60 | 0.070644387 | -40929 '20.2.1'       | grmzm2g474<br>367_t01 | 'stress.abiotic.heat'                                                                                                  |
| 27 AA | 2 | 186894631 | 98.25116993 | 31 | 0.074688245 | -47361 '27.3.57'      | grmzm2g052<br>908_t01 | 'RNA.regulation of<br>transcription.JUMONJI<br>family'                                                                 |
| 28 AA | 2 | 209329786 | 120.0730566 | 6  | 0.043269516 | -35133 '30.5'         | grmzm2g128<br>771_t01 | 'signalling.G-proteins'                                                                                                |
| 29 AA | 2 | 215989909 | 128.8383944 | 6  | 0.040326516 | -77092 '34.99'        | grmzm2g068<br>220_t01 | 'transport.misc'                                                                                                       |

|       |   |           |             |    |              |         |                 |                       |                                                                                                          |
|-------|---|-----------|-------------|----|--------------|---------|-----------------|-----------------------|----------------------------------------------------------------------------------------------------------|
| 30 AA | 2 | 217758767 | 131.4548964 | 10 | 0.05228333   | -45009  | '29.4.1.5<br>7' | grmzm2g349<br>875_t01 | 'protein.postranslational<br>modification.kinase.rece<br>ptor like cytoplasmatic<br>kinase VII'          |
| 31 AA | 3 | 106253820 | 58.5935399  | 18 | 0.080180593  | -13791  | '28.99'         | grmzm2g351<br>307_t01 | 'DNA.unspecified'                                                                                        |
| 32 AA | 3 | 136272706 | 62.99233029 | 6  | 0.116539144  | -235077 | '29.4'          | grmzm2g027<br>632_t01 | 'protein.postranslational<br>modification'                                                               |
| 33 AA | 3 | 146217490 | 65.77990892 | 10 | 0.108646925  | -534449 | '30.3'          | grmzm2g106<br>945_t01 | 'signalling.calcium'                                                                                     |
| 34 AA | 3 | 170786664 | 81.70076623 | 6  | 0.085704188  | -62304  | '30.2.11'       | grmzm2g167<br>253_t01 | 'signalling.receptor<br>kinases.leucine rich<br>repeat XI'                                               |
| 35 AA | 3 | 173982599 | 84.12121149 | 71 | 0.098605713  | -44754  | '11.8.3'        | grmzm2g149<br>617_t01 | 'lipid<br>metabolism."exotics"<br>(steroids, squalene<br>etc).UDP-glucose:sterol<br>glucosyltransferase' |
| 36 AA | 3 | 176799382 | 87.90057838 | 11 | 0.102983913  | -142087 | '16.2'          | grmzm2g165<br>192_t01 | 'secondary<br>metabolism.phenylpropa<br>noids'                                                           |
| 37 AA | 3 | 211702191 | 122.6221889 | 6  | -0.041297758 | -246240 | '29.4'          | grmzm2g150<br>952_t01 | 'protein.postranslational<br>modification'                                                               |

|       |   |           |             |    |              |         |                                        |                                                                            |
|-------|---|-----------|-------------|----|--------------|---------|----------------------------------------|----------------------------------------------------------------------------|
| 38 AA | 3 | 212222090 | 123.2709088 | 6  | -0.046587836 | -162233 | '13.1.4.1 grmzm2g004<br>382_t01        | 'amino acid<br>metabolism.synthesis.bra<br>nched chain<br>group.common'    |
| 39 AA | 3 | 212226136 | 123.2759574 | 5  | -0.06529147  | -166279 | '13.1.4.1 grmzm2g004<br>382_t01        | 'amino acid<br>metabolism.synthesis.bra<br>nched chain<br>group.common'    |
| 40 AA | 3 | 212726714 | 123.9011201 | 5  | -0.044492619 | -139    | '34.15' grmzm2g022<br>915_t01          | 'transport.potassium'                                                      |
| 41 AA | 3 | 214950753 | 128.5482503 | 22 | -0.045348234 | -38970  | '34.99' grmzm2g000<br>593_t02          | 'transport.misc'                                                           |
| 42 AA | 4 | 171000056 | 79.4221761  | 40 | -0.050350535 | -123565 | '16.8.3' grmzm2g099<br>420_t01         | 'secondary<br>metabolism.flavonoids.di<br>hydroflavonols'                  |
| 43 AA | 4 | 171777409 | 80.83845057 | 9  | -0.04494486  | -5004   | '29.5.11. grmzm2g130<br>4.2' 002_t01   | 'protein.degradation.ubiq<br>uitin.E3.RING'                                |
| 44 AA | 4 | 171777978 | 80.83927823 | 30 | -0.046656729 | -5573   | '29.5.11. grmzm2g130<br>4.2' 002_t01   | 'protein.degradation.ubiq<br>uitin.E3.RING'                                |
| 45 AA | 4 | 172891786 | 82.70364317 | 8  | -0.057980397 | -7920   | '29.2.1.2 grmzm2g411<br>.2.39' 764_t01 | 'protein.synthesis.riboso<br>mal<br>protein.eukaryotic.60S<br>subunit.L39' |
| 46 AA | 4 | 238824264 | 119.1769941 | 5  | -0.040095238 | -9761   | '31.2' grmzm2g030<br>542_t01           | 'cell.division'                                                            |

|       |   |           |              |    |              |                    |                       |                                                                                     |
|-------|---|-----------|--------------|----|--------------|--------------------|-----------------------|-------------------------------------------------------------------------------------|
| 47 AA | 4 | 245327128 | 141.6682023  | 5  | -0.092328356 | -12766 '29.5.7'    | grmzm2g006<br>069_t01 | 'protein.degradation.met<br>alloprotease'                                           |
| 48 AA | 5 | 1122      | -0.317541556 | 5  | 0.044960637  |                    |                       |                                                                                     |
| 49 AA | 5 | 1049462   | 0.606846713  | 32 | 0.05132495   | -2312 '26.22'      | grmzm2g013<br>042_t01 | 'misc.short chain<br>dehydrogenase/reductase<br>(SDR)'                              |
| 50 AA | 5 | 1621759   | 2.147079874  | 12 | 0.055070047  | -6324 '11.1.13'    | grmzm2g326<br>195_t01 | 'lipid metabolism.FA<br>synthesis and FA<br>elongation.acyl-CoA<br>binding protein' |
| 51 AA | 5 | 2598377   | 6.596313039  | 23 | 0.043582718  | -3354 '16.8.3'     | grmzm2g110<br>952_t01 | 'secondary<br>metabolism.flavonoids.di<br>hydroflavonols'                           |
| 52 AA | 5 | 2608498   | 6.662437668  | 8  | 0.045011664  | -1199 '16.8.3'     | grmzm2g110<br>881_t01 | 'secondary<br>metabolism.flavonoids.di<br>hydroflavonols'                           |
| 53 AA | 5 | 25375392  | 54.32828941  | 25 | 0.052640963  | -90 '34.19.2'      | grmzm2g305<br>446_t02 | 'transport.Major Intrinsic<br>Proteins.TIP'                                         |
| 54 AA | 5 | 27056845  | 54.96362449  | 17 | 0.05259327   | -90551 '13.2.6.2'  | grmzm2g174<br>145_t01 | 'amino acid<br>metabolism.degradation.<br>aromatic aa.tyrosine'                     |
| 55 AA | 5 | 27066959  | 54.96744605  | 6  | 0.0486529    | -100665 '13.2.6.2' | grmzm2g174<br>145_t01 | 'amino acid<br>metabolism.degradation.<br>aromatic aa.tyrosine'                     |
| 56 AA | 5 | 27983433  | 55.3137347   | 6  | 0.164199593  | -11216 '13.2.3.5'  | grmzm2g100<br>360_t01 | 'amino acid<br>metabolism.degradation.<br>aspartate family.lysine'                  |
| 57 AA | 5 | 28303009  | 55.43448613  | 8  | 0.241124487  | -2863 '28.99'      | grmzm2g138<br>744_t01 | 'DNA.unspecified'                                                                   |



|       |   |           |             |    |              |         |                     |                       |                                                                                   |
|-------|---|-----------|-------------|----|--------------|---------|---------------------|-----------------------|-----------------------------------------------------------------------------------|
| 58 AA | 5 | 29915257  | 56.04367218 | 6  | 0.057108904  | -1304   | '29.2.1.2<br>.2.23' | grmzm2g123<br>495_t01 | 'protein.synthesis.ribosomal<br>protein.eukaryotic.60S<br>subunit.L23'            |
| 59 AA | 5 | 30338901  | 56.28511551 | 23 | 0.221984742  | -18381  | '29.6'              | grmzm2g458<br>208_t01 | 'protein.folding'                                                                 |
| 60 AA | 5 | 30990738  | 56.84135946 | 15 | 0.062976606  | -24822  | '29.5.11.<br>3'     | grmzm2g146<br>374_t01 | 'protein.degradation.ubiquitin.E2'                                                |
| 61 AA | 5 | 31224995  | 57.04126226 | 6  | 0.071656737  | -4130   | '27.3.67'           | grmzm2g046<br>438_t01 | 'RNA.regulation of<br>transcription.putative<br>transcription regulator'          |
| 62 AA | 5 | 61094522  | 63.52954633 | 39 | 0.213909802  | -101947 | '27.3.35'           | grmzm2g000<br>171_t01 | 'RNA.regulation of<br>transcription.bZIP<br>transcription factor<br>family'       |
| 63 AA | 5 | 89493802  | 69.57132155 | 5  | -0.046703904 | -342485 | '33.99'             | grmzm2g131<br>638_t01 | 'development.unspecific<br>d'                                                     |
| 64 AA | 5 | 185678096 | 95.1872289  | 9  | -0.087360449 | -81323  | '27.3.25'           | grmzm2g095<br>904_t01 | 'RNA.regulation of<br>transcription.MYB<br>domain transcription<br>factor family' |

|       |   |           |             |    |              |                  |                       |                                                                                                                        |
|-------|---|-----------|-------------|----|--------------|------------------|-----------------------|------------------------------------------------------------------------------------------------------------------------|
| 65 AA | 5 | 191362737 | 100.706813  | 70 | 0.073417146  | -11175 '27.3.3'  | grmzm2g041<br>839_t01 | 'RNA.regulation of<br>transcription.AP2/EREB<br>P, APETALA2/Ethylene-<br>responsive element<br>binding protein family' |
| 66 AA | 5 | 200532850 | 108.3793509 | 5  | -0.123414326 | -1320 '27.3.8'   | grmzm2g140<br>694_t01 | 'RNA.regulation of<br>transcription.C2C2(Zn)<br>DOF zinc finger family'                                                |
| 67 AA | 5 | 202772744 | 110.6933233 | 16 | -0.07001925  | -1374 '30.5'     | grmzm2g085<br>049_t04 | 'signalling.G-proteins'<br>'RNA.regulation of<br>transcription.E2F/DP<br>transcription factor<br>family'               |
| 68 AA | 5 | 204749015 | 116.8860416 | 7  | 0.083646321  | -38969 '27.3.18' | grmzm2g378<br>665_t01 | 'RNA.regulation of<br>transcription.bHLH,Basi<br>c Helix-Loop-Helix<br>family'                                         |
| 69 AA | 5 | 206467622 | 122.460663  | 14 | -0.121162674 | -4066 '27.3.6'   | grmzm2g036<br>092_t01 | 'RNA.regulation of<br>transcription.bHLH,Basi<br>c Helix-Loop-Helix<br>family'                                         |
| 70 AA | 5 | 207521465 | 125.022936  | 8  | -0.056063751 | -129402 '31.1'   | grmzm2g061<br>950_t01 | 'cell.organisation'                                                                                                    |
| 71 AA | 5 | 207525531 | 125.0317036 | 16 | -0.085116692 | -133468 '31.1'   | grmzm2g061<br>950_t01 | 'cell.organisation'                                                                                                    |
| 72 AA | 5 | 209222556 | 128.3660113 | 6  | -0.173721735 | -9430 '27.2'     | grmzm2g055<br>859_t01 | 'RNA.transcription'                                                                                                    |

|       |   |           |              |    |              |                           |                       |                                                                                   |
|-------|---|-----------|--------------|----|--------------|---------------------------|-----------------------|-----------------------------------------------------------------------------------|
| 73 AA | 5 | 211196887 | 135.9702305  | 23 | -0.069770475 | -52434 '29.1.5'           | grmzm2g478<br>664_t01 | 'protein.aa<br>activation.isoleucine-<br>tRNA ligase'                             |
| 74 AA | 5 | 211196920 | 135.9703687  | 64 | -0.080191679 | -52467 '29.1.5'           | grmzm2g478<br>664_t01 | 'protein.aa<br>activation.isoleucine-<br>tRNA ligase'                             |
| 75 AA | 6 | 3992126   | -6.319411877 | 5  | -0.093170865 | -114191 '27.3.27'         | grmzm2g030<br>325_t01 | 'RNA.regulation of<br>transcription.NAC<br>domain transcription<br>factor family' |
| 76 AA | 6 | 25737849  | 7.832137091  | 22 | -0.098932689 | -401027 '31.1'            | grmzm2g037<br>140_t01 | 'cell.organisation'                                                               |
| 77 AA | 6 | 31537911  | 8.165545093  | 17 | -0.116422372 | '29.5.11.<br>-148874 4.2' | grmzm2g567<br>897_t01 | 'protein.degradation.ubiq<br>uitin.E3.RING'                                       |
| 78 AA | 6 | 79774320  | 11.21454839  | 11 | -0.073829076 | -22692 '20.1'             | grmzm2g103<br>033_t01 | 'stress.biotic'                                                                   |
| 79 AA | 6 | 97578306  | 23.60510141  | 10 | -0.064507888 | -37737 '29.4'             | grmzm2g018<br>280_t01 | 'protein.postranslational<br>modification'                                        |
| 80 AA | 6 | 97988317  | 23.94996475  | 41 | -0.052440749 | -158913 '23.3.3'          | grmzm2g162<br>605_t03 | 'nucleotide<br>metabolism.salvage.NU<br>DIX hydrolases'                           |
| 81 AA | 6 | 98199018  | 24.12718696  | 9  | -0.053340471 | -60622 '34.15'            | grmzm2g146<br>760_t01 | 'transport.potassium'                                                             |

|       |   |           |             |    |              |                       |                       |                                                                                                                 |
|-------|---|-----------|-------------|----|--------------|-----------------------|-----------------------|-----------------------------------------------------------------------------------------------------------------|
| 82 AA | 6 | 98204433  | 24.13174155 | 5  | -0.05362577  | -66037 '34.15'        | grmzm2g146<br>760_t01 | 'transport.potassium'                                                                                           |
| 83 AA | 6 | 98282571  | 24.19746402 | 8  | -0.0579035   | -3437 '27.3.38'       | grmzm2g180<br>654_t02 | 'RNA.regulation of<br>transcription.AT-rich<br>interaction domain<br>containing transcription<br>factor family' |
| 84 AA | 6 | 99986756  | 25.63086689 | 5  | -0.061329207 | -41187 '31.1'         | grmzm2g112<br>337_t03 | 'cell.organisation'                                                                                             |
| 85 AA | 6 | 110900537 | 37.5884191  | 5  | -0.050221184 | -91005 '29.5'         | grmzm2g167<br>733_t01 | 'protein.degradation'                                                                                           |
| 86 AA | 6 | 163949428 | 95.77601009 | 10 | 0.05979466   | '29.5.11.<br>-4289 3' | grmzm2g381<br>709_t01 | 'protein.degradation.ubiq<br>uitin.E2'                                                                          |
| 87 AA | 6 | 164286396 | 96.9462491  | 7  | 0.091622048  | -4939 '24'            | grmzm2g458<br>607_t01 | 'Biodegradation of<br>Xenobiotics'                                                                              |
| 88 AA | 6 | 165260207 | 101.8645066 | 9  | 0.099911569  | -5006 '34.2'          | grmzm2g160<br>430_t01 | 'transport.sugars'                                                                                              |
| 89 AA | 7 | 27056327  | 46.72949889 | 30 | 0.069854871  | -395034 '23.2'        | grmzm2g173<br>063_t01 | 'nucleotide<br>metabolism.degradation'                                                                          |
| 90 AA | 7 | 28113557  | 46.92394381 | 6  | 0.042729427  | -82741 '17.2.1'       | grmzm2g003<br>789_t01 | 'hormone<br>metabolism.auxin.synthe<br>sis-degradation'                                                         |
| 91 AA | 7 | 28365776  | 46.97033173 | 8  | 0.044151146  | -241637 '17.2.1'      | grmzm2g016<br>958_t01 | 'hormone<br>metabolism.auxin.synthe<br>sis-degradation'                                                         |

|        |   |           |             |    |              |                   |                       |                                                                                   |
|--------|---|-----------|-------------|----|--------------|-------------------|-----------------------|-----------------------------------------------------------------------------------|
| 92 AA  | 7 | 37151920  | 48.23780461 | 7  | 0.043532305  | -23688 '34.7'     | grmzm2g139<br>639_t01 | 'transport.phosphate'                                                             |
| 93 AA  | 7 | 69012950  | 49.23292513 | 5  | 0.055519521  | -849084 '30.2.11' | grmzm2g092<br>604_t01 | 'signalling.receptor<br>kinases.leucine rich<br>repeat XI'                        |
| 94 AA  | 7 | 83079854  | 49.85510044 | 8  | 0.04954641   | -237227 '30.3'    | grmzm2g140<br>949_t01 | 'signalling.calcium'                                                              |
| 95 AA  | 7 | 84174593  | 49.90284891 | 8  | 0.04989524   | -471934 '26.10'   | grmzm2g027<br>041_t01 | 'misc.cytochrome P450'                                                            |
| 96 AA  | 7 | 139404320 | 77.80580845 | 69 | 0.087922424  | -68747 '31.1'     | grmzm2g046<br>186_t01 | 'cell.organisation'                                                               |
| 97 AA  | 7 | 143287112 | 81.20148454 | 20 | 0.054812272  | -104020 '20.1'    | grmzm2g028<br>713_t01 | 'stress.biotic'                                                                   |
| 98 AA  | 7 | 150564610 | 88.45717741 | 32 | 0.06982965   | -6831 '30.2.24'   | grmzm2g465<br>999_t01 | 'signalling.receptor<br>kinases.S-locus<br>glycoprotein like'                     |
| 99 AA  | 7 | 167987389 | 129.6248256 | 6  | -0.118145535 | -222236 '27.3.27' | grmzm2g430<br>849_t01 | 'RNA.regulation of<br>transcription.NAC<br>domain transcription<br>factor family' |
| 100 AA | 7 | 169227583 | 134.2608759 | 5  | -0.06723496  | -10719 '27.3.66'  | grmzm2g005<br>732_t01 | 'RNA.regulation of<br>transcription.Psdo ARR<br>transcription factor<br>family'   |

|        |   |           |             |    |              |                   |                       |                                                                                                                     |
|--------|---|-----------|-------------|----|--------------|-------------------|-----------------------|---------------------------------------------------------------------------------------------------------------------|
| 101 AA | 8 | 103390158 | 58.85914851 | 73 | 0.067148754  | -151198 '20.1'    | grmzm2g047<br>152_t01 | 'stress.biotic'                                                                                                     |
| 102 AA | 8 | 117265267 | 63.49683053 | 11 | 0.076581176  | -67450 '20.2.3'   | ac204277.3_f<br>gt006 | 'stress.abiotic.drought/sal<br>t'                                                                                   |
| 103 AA | 8 | 161883485 | 91.64355886 | 10 | -0.044006499 | -212095 '27.3.99' | grmzm2g001<br>088_t01 | 'RNA.regulation of<br>transcription.unclassified<br>'                                                               |
| 104 AA | 8 | 161918620 | 91.67206646 | 11 | -0.049289191 | -32027 '27.3.55'  | ac183950.2_f<br>gt003 | 'RNA.regulation of<br>transcription.HDA'                                                                            |
| 105 AA | 8 | 161918881 | 91.67227822 | 36 | -0.053035985 | -32288 '27.3.55'  | ac183950.2_f<br>gt003 | 'RNA.regulation of<br>transcription.HDA'                                                                            |
| 106 AA | 8 | 161918960 | 91.67234232 | 7  | -0.052130376 | -32367 '27.3.55'  | ac183950.2_f<br>gt003 | 'RNA.regulation of<br>transcription.HDA'                                                                            |
| 107 AA | 8 | 163479600 | 95.34210376 | 11 | -0.050996234 | -41353 '29.5.5'   | grmzm2g172<br>829_t01 | 'protein.degradation.seri<br>ne protease'                                                                           |
| 108 AA | 8 | 170533744 | 122.5329248 | 12 | -0.071952615 | -8831 '26.8'      | grmzm2g440<br>003_t01 | 'misc.nitrilases, *nitrile<br>lyases, berberine bridge<br>enzymes, reticuline<br>oxidases, troponine<br>reductases' |
| 109 AA | 8 | 170538447 | 122.5649034 | 10 | -0.073601987 | -13534 '26.8'     | grmzm2g440<br>003_t01 | 'misc.nitrilases, *nitrile<br>lyases, berberine bridge<br>enzymes, reticuline<br>oxidases, troponine<br>reductases' |
| 110 AA | 8 | 170538683 | 122.5665081 | 58 | -0.067975625 | -13770 '26.8'     | grmzm2g440<br>003_t01 | 'misc.nitrilases, *nitrile<br>lyases, berberine bridge<br>enzymes, reticuline<br>oxidases, troponine<br>reductases' |

|        |   |          |             |    |              |                  |                       |                                                     |
|--------|---|----------|-------------|----|--------------|------------------|-----------------------|-----------------------------------------------------|
| 111 AA | 9 | 5956414  | 5.403679997 | 8  | -0.064234269 | -105 '28.1'      | grmzm2g093<br>772_t01 | 'DNA.synthesis/chromatin structure'                 |
| 112 AA | 9 | 6999573  | 8.221311595 | 5  | -0.059674728 | -205967 '20.2.1' | grmzm2g097<br>620_t01 | 'stress.abiotic.heat'                               |
| 113 AA | 9 | 7239482  | 8.869319404 | 9  | -0.047569805 | -97437 '31.1'    | grmzm2g017<br>257_t01 | 'cell.organisation'                                 |
| 114 AA | 9 | 7239499  | 8.869365322 | 5  | -0.043097808 | -97454 '31.1'    | grmzm2g017<br>257_t01 | 'cell.organisation'                                 |
| 115 AA | 9 | 9143611  | 13.42656327 | 6  | -0.065774986 | -36600 '17.5.1'  | grmzm2g066<br>358_t01 | 'hormone metabolism.ethylene.synthesis-degradation' |
| 116 AA | 9 | 9143948  | 13.42709594 | 23 | -0.0560366   | -297 '33.99'     | grmzm2g088<br>053_t01 | 'development.unspecified'                           |
| 117 AA | 9 | 20663923 | 36.69381857 | 30 | -0.056366108 | -1102 '26.13'    | grmzm2g404<br>897_t04 | 'misc.acid and other phosphatases'                  |
| 118 AA | 9 | 20665105 | 36.69570972 | 16 | -0.062945098 | -2284 '26.13'    | grmzm2g404<br>897_t04 | 'misc.acid and other phosphatases'                  |
| 119 AA | 9 | 20668477 | 36.70110477 | 32 | -0.060619679 | -2938 '34.2'     | grmzm2g404<br>965_t02 | 'transport.sugars'                                  |

|        |    |           |             |    |              |                 |                       |                                                                                                |
|--------|----|-----------|-------------|----|--------------|-----------------|-----------------------|------------------------------------------------------------------------------------------------|
| 120 AA | 9  | 23215839  | 39.99840064 | 20 | -0.058749345 | -198908 '3.4.3' | grmzm2g010<br>768_t01 | 'minor CHO<br>metabolism.myo-<br>inositol.InsP Synthases'                                      |
| 121 AA | 9  | 86468357  | 46.72572703 | 12 | -0.079201882 | -1889 '20.2'    | grmzm2g083<br>655_t01 | 'stress.abiotic'                                                                               |
| 122 AA | 9  | 116766687 | 57.30110688 | 5  | 0.11081529   | -118 '29.5'     | grmzm2g132<br>238_t01 | 'protein.degradation'                                                                          |
| 123 AA | 9  | 116766688 | 57.30110724 | 6  | 0.112627991  | -119 '29.5'     | grmzm2g132<br>238_t01 | 'protein.degradation'                                                                          |
| 124 AA | 9  | 133018761 | 68.62115268 | 53 | -0.087203152 | -45072 '9.1.2'  | ac206223.3_f<br>gt010 | 'mitochondrial electron<br>transport / ATP<br>synthesis.NADH-<br>DH.localisation not<br>clear' |
| 125 AA | 9  | 135396489 | 72.43328428 | 16 | -0.066126002 | -12438 '28.1'   | grmzm2g063<br>151_t01 | 'DNA.synthesis/chromati<br>n structure'                                                        |
| 126 AA | 9  | 140748270 | 85.13070924 | 14 | 0.115475213  | -13160 '31.3.1' | grmzm2g393<br>515_t01 | 'cell.cycle.peptidylprolyl<br>isomerase'                                                       |
| 127 AA | 10 | 18523635  | 33.86783022 | 6  | -0.110952691 | -132048 '29.5'  | grmzm2g015<br>238_t01 | 'protein.degradation'                                                                          |



|        |    |           |             |    |              |         |                   |                       |                                                                                                    |
|--------|----|-----------|-------------|----|--------------|---------|-------------------|-----------------------|----------------------------------------------------------------------------------------------------|
| 128 AA | 10 | 99357506  | 43.32459092 | 9  | -0.055016754 | -118526 | '7.1.1'           | grmzm2g177<br>077_t01 | 'OPP.oxidative<br>PP.G6PD'                                                                         |
| 129 AA | 10 | 102164870 | 43.55066643 | 36 | -0.048664179 | -5097   | '29.5.11.<br>4.2' | grmzm2g035<br>899_t03 | 'protein.degradation.ubiq<br>uitin.E3.RING'                                                        |
| 130 AA | 10 | 102628153 | 43.57658233 | 13 | -0.054721851 | -435574 | '33.99'           | ac204711.3_f<br>gt003 | 'development.unspecifie<br>d'                                                                      |
| 131 AA | 10 | 111326819 | 44.71918576 | 13 | -0.049289342 | -56084  | '11.9.2.1<br>'    | grmzm2g153<br>232_t01 | 'lipid metabolism.lipid<br>degradation.lipases.triac<br>ylglycerol lipase'                         |
| 132 AA | 10 | 140890733 | 72.76364342 | 23 | 0.113234282  | -16536  | '10.7'            | grmzm2g142<br>857_t01 | 'cell wall.modification'<br>'transport.ABC<br>transporters and<br>multidrug resistance<br>systems' |
| 133 AA | 10 | 143035801 | 79.92097141 | 6  | 0.075903997  | -17469  | '34.16'           | grmzm2g148<br>492_t01 | 'misc.UDP glucosyl and<br>glucuronyl transferases'                                                 |
| 134 AA | 10 | 146203306 | 89.79952703 | 10 | 0.075504717  | -2542   | '26.2'            | grmzm2g067<br>424_t01 | 'RNA.regulation of<br>transcription.unclassified<br>'                                              |
| 135 AA | 10 | 146234149 | 89.92263189 | 71 | 0.074311201  | -643    | '27.3.99'         | grmzm2g066<br>981_t07 |                                                                                                    |

|          |    |           |             |    |              |                           |                       |                                                                                 |
|----------|----|-----------|-------------|----|--------------|---------------------------|-----------------------|---------------------------------------------------------------------------------|
| 136 AA   | 10 | 148094143 | 99.83248299 | 14 | 0.059544285  | -2526 '27.3.67'           | grmzm2g074<br>107_t01 | 'RNA.regulation of<br>transcription.putative<br>transcription regulator'        |
| 137 AA   | 10 | 148490503 | 102.0543415 | 7  | 0.053929166  | -431 '29.4'               | grmzm2g104<br>658_t01 | 'protein.postranslational<br>modification'                                      |
| 138 AA   | 10 | 148496397 | 102.0873812 | 22 | 0.050154105  | -6325 '29.4'              | grmzm2g104<br>658_t01 | 'protein.postranslational<br>modification'                                      |
| 139 Chla | 1  | 64135223  | 73.46224774 | 7  | -1.078365591 | -31100 '26.10'            | grmzm2g459<br>563_t01 | 'misc.cytochrome P450'                                                          |
| 140 Chla | 1  | 68902676  | 76.2644894  | 18 | -1.11398638  | -487854 '30.4.1'          | grmzm2g111<br>208_t01 | 'signalling.phosphinositi<br>des.phosphatidylinositol-<br>4-phosphate 5-kinase' |
| 141 Chla | 1  | 70951065  | 77.30587192 | 7  | -1.009978169 | -16544 '7.1.1'            | grmzm2g179<br>521_t01 | 'OPP.oxidative<br>PP.G6PD'                                                      |
| 142 Chla | 1  | 71560037  | 77.6154678  | 8  | -1.079988686 | -3479 '13.99'             | grmzm2g096<br>682_t02 | 'amino acid<br>metabolism.misc'                                                 |
| 143 Chla | 1  | 114166513 | 89.09571398 | 6  | -1.00096502  | '29.5.11.<br>-118419 4.2' | grmzm2g069<br>070_t01 | 'protein.degradation.ubiq<br>uitin.E3.RING'                                     |

|          |   |           |             |    |              |                      |                       |                                                                                |
|----------|---|-----------|-------------|----|--------------|----------------------|-----------------------|--------------------------------------------------------------------------------|
| 144 Chla | 1 | 126428605 | 89.3753375  | 5  | -1.429246348 | -544181 '25'         | grmzm2g421<br>493_t01 | 'C1-metabolism'                                                                |
| 145 Chla | 1 | 139906399 | 89.5123698  | 6  | -1.832781348 | -65027 '17.5.1'      | grmzm2g162<br>158_t01 | 'hormone<br>metabolism.ethylene.synt<br>hesis-degradation'                     |
| 146 Chla | 1 | 179696720 | 96.44277983 | 6  | 2.546725312  | -190275 '24.2'       | grmzm2g067<br>028_t01 | 'Biodegradation of<br>Xenobiotics.lactoylglutat<br>hione lyase'                |
| 147 Chla | 1 | 280711700 | 175.6831083 | 16 | -1.675800132 | -52603 '10.2'        | grmzm2g028<br>286_t01 | 'cell wall.cellulose<br>synthesis'                                             |
| 148 Chla | 1 | 283540151 | 178.0419378 | 6  | -1.065382143 | -143465 '31.1'       | grmzm2g568<br>484_t01 | 'cell.organisation'                                                            |
| 149 Chla | 1 | 283829657 | 178.2988059 | 23 | -1.082471106 | -432971 '31.1'       | grmzm2g568<br>484_t01 | 'cell.organisation'                                                            |
| 150 Chla | 1 | 283830436 | 178.2994971 | 6  | -1.062943975 | -433750 '31.1'       | grmzm2g568<br>484_t01 | 'cell.organisation'                                                            |
| 151 Chla | 1 | 284054336 | 178.4981554 | 14 | -1.146037697 | '13.1.7.9<br>-5982 ' | grmzm2g058<br>584_t01 | 'amino acid<br>metabolism.synthesis.his<br>tidine.histidinol<br>dehydrogenase' |

|          |   |          |             |    |             |                         |                       |                                                                                                                                  |
|----------|---|----------|-------------|----|-------------|-------------------------|-----------------------|----------------------------------------------------------------------------------------------------------------------------------|
| 152 Chla | 2 | 1944162  | 3.262633877 | 5  | 0.896831894 | -1230 '17.6.3'          | grmzm2g068<br>202_t01 | 'hormone<br>metabolism.gibberelin.in<br>duced-regulated-<br>responsive-activated'                                                |
| 153 Chla | 2 | 2021345  | 3.611041843 | 12 | 0.871536011 | -14184 '1.1.1.1'        | grmzm2g039<br>996_t01 | 'PS.lightreaction.photosy<br>stem II.LHC-II'                                                                                     |
| 154 Chla | 2 | 2211569  | 4.4697226   | 48 | 0.962856414 | -141542 '27.3.5'        | grmzm2g040<br>736_t01 | 'RNA.regulation of<br>transcription.ARR'<br>'RNA.regulation of<br>transcription.G2-like<br>transcription factor<br>family, GARP' |
| 155 Chla | 2 | 3128671  | 6.982329207 | 6  | 0.876581025 | -322 '27.3.20'          | grmzm2g035<br>370_t04 | 'transcription factor<br>family, GARP'                                                                                           |
| 156 Chla | 2 | 23800488 | 55.83244658 | 6  | 1.46067929  | -104976 '21.1'          | grmzm2g026<br>656_t01 | 'redox.thioredoxin'                                                                                                              |
| 157 Chla | 2 | 23881650 | 55.91619654 | 8  | 1.16323104  | -77766 '34.16'          | grmzm2g177<br>812_t01 | 'transport.ABC<br>transporters and<br>multidrug resistance<br>systems'                                                           |
| 158 Chla | 2 | 24284899 | 56.33230369 | 13 | 1.367200877 | -33020 '27.3.25'        | grmzm2g447<br>090_t01 | 'RNA.regulation of<br>transcription.MYB<br>domain transcription<br>factor family'                                                |
| 159 Chla | 2 | 24312309 | 56.3605877  | 7  | 1.310766647 | -60430 '27.3.25'        | grmzm2g447<br>090_t01 | 'RNA.regulation of<br>transcription.MYB<br>domain transcription<br>factor family'                                                |
| 160 Chla | 2 | 25437487 | 57.05362901 | 6  | 1.199994036 | '29.3.4.9<br>-127907 9' | grmzm2g031<br>360_t01 | 'protein.targeting.secreto<br>ry pathway.unspecified'                                                                            |

|          |   |           |             |    |              |         |                   |                       |                                                                                     |
|----------|---|-----------|-------------|----|--------------|---------|-------------------|-----------------------|-------------------------------------------------------------------------------------|
| 161 Chla | 2 | 25437559  | 57.05368243 | 5  | 1.144917046  | -127979 | '29.3.4.9<br>9'   | grmzm2g031<br>360_t01 | 'protein.targeting.secreto<br>ry pathway.unspecified'                               |
| 162 Chla | 2 | 26691735  | 57.98437622 | 14 | 1.092321355  | -39088  | '17.1.3'          | grmzm2g413<br>887_t01 | 'hormone<br>metabolism.abscisic<br>acid.induced-regulated-<br>responsive-activated' |
| 163 Chla | 2 | 26773008  | 58.04468695 | 6  | 0.928679226  | -77292  | '27.1'            | grmzm2g171<br>410_t01 | 'RNA.processing'                                                                    |
| 164 Chla | 2 | 44156463  | 69.46377693 | 6  | -2.024801273 | -157155 | '34.2'            | grmzm2g061<br>495_t01 | 'transport.sugars'                                                                  |
| 165 Chla | 2 | 175505228 | 86.58930765 | 7  | 1.255193753  | -20716  | '29.5.11.<br>4.2' | grmzm2g425<br>965_t01 | 'protein.degradation.ubiq<br>uitin.E3.RING'                                         |
| 166 Chla | 3 | 13632616  | 40.54644966 | 5  | 0.97166907   | -6548   | '27.2'            | grmzm2g102<br>664_t01 | 'RNA.transcription'                                                                 |
| 167 Chla | 3 | 17328400  | 45.32523697 | 9  | 1.191986808  | -21217  | '15.2'            | grmzm2g099<br>340_t01 | 'metal handling.binding,<br>chelation and storage'                                  |
| 168 Chla | 3 | 20129322  | 48.94693416 | 8  | 1.760642777  | -7237   | '30.2.20'         | grmzm2g013<br>790_t01 | 'signalling.receptor<br>kinases.wheat LRK10<br>like'                                |
| 169 Chla | 3 | 27862522  | 53.36115573 | 10 | 1.423867597  | -158578 | '29.4'            | grmzm2g012<br>472_t01 | 'protein.postranslational<br>modification'                                          |

|          |   |           |             |    |              |                 |                       |                                                                                             |
|----------|---|-----------|-------------|----|--------------|-----------------|-----------------------|---------------------------------------------------------------------------------------------|
| 170 Chla | 3 | 142821459 | 64.10032051 | 8  | 2.211347578  | -35767 '29.3.3' | grmzm2g171<br>390_t05 | 'protein.targeting.chlorop<br>last'                                                         |
| 171 Chla | 3 | 176382057 | 87.28804733 | 7  | 2.673712072  | -18885 '31.2'   | grmzm2g007<br>659_t01 | 'cell.division'                                                                             |
| 172 Chla | 3 | 212248700 | 123.3041123 | 17 | -1.457436983 | -2158 '16.7'    | grmzm2g349<br>407_t01 | 'secondary<br>metabolism.wax'                                                               |
| 173 Chla | 3 | 213848077 | 126.6554907 | 48 | -1.687766558 | -44219 '26.2'   | grmzm2g048<br>010_t01 | 'misc.UDP glucosyl and<br>glucuronyl transferases'                                          |
| 174 Chla | 3 | 213848298 | 126.6560335 | 10 | -1.668877969 | -44440 '26.2'   | grmzm2g048<br>010_t01 | 'misc.UDP glucosyl and<br>glucuronyl transferases'                                          |
| 175 Chla | 3 | 213894582 | 126.7697196 | 24 | -1.531651849 | -34624 '1.5.1'  | grmzm2g348<br>512_t02 | 'PS.carbon concentrating<br>mechanism.C4'                                                   |
| 176 Chla | 3 | 214166666 | 127.4380314 | 10 | -1.452335655 | -80589 '23.4.1' | grmzm2g125<br>193_t01 | 'nucleotide<br>metabolism.phosphotran<br>sfer and<br>pyrophosphatases.adenyl<br>ate kinase' |
| 177 Chla | 3 | 214171011 | 127.4487039 | 27 | -1.512209361 | -84934 '23.4.1' | grmzm2g125<br>193_t01 | 'nucleotide<br>metabolism.phosphotran<br>sfer and<br>pyrophosphatases.adenyl<br>ate kinase' |
| 178 Chla | 3 | 215371494 | 129.1375553 | 18 | -1.61194824  | -13200 '29.5.3' | grmzm2g042<br>332_t01 | 'protein.degradation.cyst<br>eine protease'                                                 |

|          |   |           |             |    |              |                       |                       |                                                                                                          |
|----------|---|-----------|-------------|----|--------------|-----------------------|-----------------------|----------------------------------------------------------------------------------------------------------|
| 179 Chla | 3 | 215732765 | 129.6435644 | 14 | -1.22775052  | -52112 '27.3.69'      | grmzm2g702<br>253_t03 | 'RNA.regulation of transcription.SET-domain transcriptional regulator family'                            |
| 180 Chla | 4 | 25857163  | 48.23906117 | 17 | 1.151000831  | -5111 '34.13'         | grmzm2g026<br>459_t01 | 'transport.peptides and oligopeptides'                                                                   |
| 181 Chla | 4 | 33663511  | 51.99288995 | 5  | 1.206422642  | -136974 '7.2.2'       | grmzm2g139<br>550_t01 | 'OPP.non-reductive PP.transaldolase'                                                                     |
| 182 Chla | 4 | 35498708  | 52.93310614 | 10 | 1.229496466  | -83751 '27.3.6'       | grmzm2g017<br>586_t01 | 'RNA.regulation of transcription.bHLH,Basic Helix-Loop-Helix family'                                     |
| 183 Chla | 4 | 36054065  | 53.09837236 | 5  | 1.000540179  | -6122 '33.99'         | grmzm2g111<br>247_t01 | 'development.unspecific'                                                                                 |
| 184 Chla | 4 | 172424061 | 81.94381184 | 13 | -3.771641365 | '29.3.4.3<br>-26213 ' | grmzm2g178<br>972_t01 | 'protein.targeting.secretory pathway.vacuole'                                                            |
| 185 Chla | 4 | 177225726 | 88.56915079 | 8  | -1.412797811 | -75966 '29.4'         | grmzm2g158<br>860_t02 | 'protein.postranslational modification'                                                                  |
| 186 Chla | 4 | 177329556 | 88.69420796 | 10 | -2.097767711 | -5203 '27.3.67'       | grmzm2g475<br>583_t01 | 'RNA.regulation of transcription.putative transcription regulator'                                       |
| 187 Chla | 4 | 177855845 | 90.07794504 | 8  | -2.176405818 | -9233 '27.3.3'        | grmzm2g084<br>457_t01 | 'RNA.regulation of transcription.AP2/EREBP, APETALA2/Ethylene-responsive element binding protein family' |

|     |      |   |           |             |    |              |                  |                       |                                                                                      |
|-----|------|---|-----------|-------------|----|--------------|------------------|-----------------------|--------------------------------------------------------------------------------------|
| 188 | Chla | 5 | 166987510 | 78.8793885  | 5  | -2.122907288 | -153446 '33.99'  | grmzm2g099<br>334_t01 | 'development.unspecific<br>d'                                                        |
| 189 | Chla | 5 | 189389642 | 98.99515772 | 8  | -1.297088271 | -76276 '27.3.9'  | grmzm2g140<br>669_t01 | 'RNA.regulation of<br>transcription.C2C2(Zn)<br>GATA transcription<br>factor family' |
| 190 | Chla | 5 | 205646722 | 119.7979212 | 13 | -1.057085938 | -92306 '29.4'    | grmzm2g127<br>632_t01 | 'protein.postranslational<br>modification'                                           |
| 191 | Chla | 5 | 205662084 | 119.8477507 | 30 | -1.106120646 | -12253 '17.2.2'  | grmzm2g074<br>267_t01 | 'hormone<br>metabolism.auxin.signal<br>transduction'                                 |
| 192 | Chla | 5 | 205842860 | 120.4341313 | 9  | -1.314471195 | -8384 '34.18.1'  | grmzm2g105<br>539_t01 | 'transport.unspecified<br>anions.arsenite-<br>transporting ATPase'                   |
| 193 | Chla | 5 | 208092874 | 126.5365424 | 8  | -1.242235214 | -5948 '26.19'    | grmzm2g045<br>927_t01 | 'misc.plastocyanin-like'                                                             |
| 194 | Chla | 5 | 208411778 | 126.7985254 | 6  | -1.034251892 | -66728 '20.2.1'  | grmzm2g072<br>300_t01 | 'stress.abiotic.heat'                                                                |
| 195 | Chla | 5 | 212548689 | 141.0955085 | 7  | -1.625212605 | -9665 '21.2'     | grmzm2g119<br>782_t01 | 'redox.ascorbate and<br>glutathione'                                                 |
| 196 | Chla | 6 | 125640414 | 46.48436302 | 14 | -2.050901443 | -62488 '8.1.1.3' | grmzm2g159<br>570_t01 | 'TCA / org.<br>transformation.TCA.pyr<br>uvate DH.E3'                                |



|     |      |   |           |             |    |              |         |                 |                       |                                                                    |
|-----|------|---|-----------|-------------|----|--------------|---------|-----------------|-----------------------|--------------------------------------------------------------------|
| 197 | Chla | 6 | 125640415 | 46.48436337 | 17 | -2.07079645  | -62489  | '8.1.1.3'       | grmzm2g159<br>570_t01 | 'TCA / org.<br>transformation.TCA.pyruvate DH.E3'                  |
| 198 | Chla | 6 | 159559960 | 82.11064054 | 5  | -0.859575964 | -56867  | '29.5.5'        | grmzm2g331<br>833_t01 | 'protein.degradation.serine protease'                              |
| 199 | Chla | 7 | 33122197  | 47.86676722 | 19 | 1.636985743  | -486602 | '31.3.1'        | grmzm2g092<br>072_t01 | 'cell.cycle.peptidylprolyl isomerase'                              |
| 200 | Chla | 7 | 35108196  | 48.14677419 | 7  | 2.022809364  | -164805 | '29.5.11.4.5.2' | grmzm2g109<br>738_t01 | 'protein.degradation.ubiquitin.E3.BTB/POZ Cullin3.BTB/POZ'         |
| 201 | Chla | 7 | 35397449  | 48.15875943 | 7  | 1.157786171  | -88567  | '29.5.1'        | grmzm2g076<br>417_t01 | 'protein.degradation.subtilases'                                   |
| 202 | Chla | 7 | 42768959  | 48.86677354 | 5  | 0.867518993  | -226886 | '30.3'          | grmzm2g433<br>551_t01 | 'signalling.calcium'                                               |
| 203 | Chla | 7 | 125979602 | 66.69618807 | 7  | 2.632081769  | -70577  | '34.14'         | grmzm2g090<br>149_t01 | 'transport.unspecified cations'                                    |
| 204 | Chla | 7 | 157918090 | 102.0917472 | 6  | 1.307677429  | -81602  | '27.4'          | grmzm2g068<br>255_t01 | 'RNA.RNA binding'                                                  |
| 205 | Chla | 8 | 8405589   | 21.20394308 | 18 | 1.770676205  | -149874 | '27.3.67'       | ac234160.1_f<br>gt001 | 'RNA.regulation of transcription.putative transcription regulator' |

|          |    |           |             |    |              |                 |                       |                                                                                        |
|----------|----|-----------|-------------|----|--------------|-----------------|-----------------------|----------------------------------------------------------------------------------------|
| 206 Chla | 9  | 21661674  | 38.29017663 | 5  | -1.285619712 | -3078 '27.1'    | grmzm2g115<br>156_t01 | 'RNA.processing'                                                                       |
| 207 Chla | 9  | 21670412  | 38.30415705 | 15 | -1.744014465 | -5027 '10.1.7'  | grmzm2g115<br>124_t01 | 'cell wall.precursor<br>synthesis.GMD'                                                 |
| 208 Chla | 9  | 23215197  | 39.99779948 | 11 | -1.046360749 | -198266 '3.4.3' | grmzm2g010<br>768_t01 | 'minor CHO<br>metabolism.myo-<br>inositol.InsP Synthases'                              |
| 209 Chla | 9  | 26434264  | 43.26084016 | 59 | -1.065132951 | -1131 '11.1.8'  | grmzm2g393<br>146_t03 | 'lipid metabolism.FA<br>synthesis and FA<br>elongation.acyl coa<br>ligase'             |
| 210 Chla | 10 | 143379980 | 80.93578714 | 10 | 1.736257572  | -30629 '16.8.3' | grmzm2g431<br>504_t01 | 'secondary<br>metabolism.flavonoids.di<br>hydroflavonols'                              |
| 211 Chla | 10 | 145845320 | 88.37068362 | 8  | 1.167874183  | -103010 '34.1'  | grmzm2g006<br>894_t01 | 'transport.p- and v-<br>ATPases'                                                       |
| 212 Chla | 10 | 148232936 | 100.610509  | 8  | 1.106911557  | -20743 '34.15'  | grmzm2g039<br>797_t01 | 'transport.potassium'<br>'transport.metabolite<br>transporters at the<br>mitochondrial |
| 213 Chla | 10 | 148450393 | 101.8294985 | 36 | 1.201764063  | -7791 '34.9'    | grmzm2g177<br>213_t01 | membrane'                                                                              |
| 214 Chla | 10 | 148497003 | 102.0907782 | 6  | 1.10547339   | -181 '29.4'     | grmzm2g104<br>658_t07 | 'protein.postranslational<br>modification'                                             |

|     |      |    |           |             |    |             |                   |                       |                                                                                   |
|-----|------|----|-----------|-------------|----|-------------|-------------------|-----------------------|-----------------------------------------------------------------------------------|
| 215 | Chla | 10 | 148499295 | 102.1036264 | 9  | 1.10891694  | -2216 '29.4'      | grmzm2g104<br>658_t09 | 'protein.postranslational<br>modification'                                        |
| 216 | Chlb | 1  | 97031439  | 87.3597852  | 18 | 0.627113181 | -66195 '27.3.27'  | grmzm2g082<br>709_t01 | 'RNA.regulation of<br>transcription.NAC<br>domain transcription<br>factor family' |
| 217 | Chlb | 1  | 101441507 | 87.90304019 | 5  | 0.237222688 | -329169 '16.8.3'  | grmzm2g068<br>917_t01 | 'secondary<br>metabolism.flavonoids.di<br>hydroflavonols'                         |
| 218 | Chlb | 1  | 103855930 | 88.27009228 | 13 | 0.528617492 | -362145 '10.2.1'  | grmzm2g436<br>299_t01 | 'cell wall.cellulose<br>synthesis.cellulose<br>synthase'                          |
| 219 | Chlb | 1  | 138458661 | 89.49765026 | 6  | 0.636936144 | -881999 '27.3.39' | grmzm2g153<br>594_t01 | 'RNA.regulation of<br>transcription.AtSR<br>Transcription Factor<br>family'       |
| 220 | Chlb | 1  | 141762525 | 89.53124152 | 15 | 0.677150275 | -94249 '27.2'     | grmzm2g045<br>668_t01 | 'RNA.transcription'                                                               |
| 221 | Chlb | 1  | 146716486 | 89.58160975 | 18 | 37.87537959 | -77548 '34.12'    | grmzm2g057<br>820_t01 | 'transport.metal'                                                                 |
| 222 | Chlb | 1  | 150498647 | 89.94777187 | 5  | 0.650291443 | -205344 '33.99'   | grmzm2g075<br>456_t01 | 'development.unspecifie<br>d'                                                     |
| 223 | Chlb | 1  | 163239765 | 91.63742221 | 8  | 0.375622346 | -591921 '10.3'    | grmzm2g703<br>790_t01 | 'cell wall.hemicellulose<br>synthesis'                                            |

|     |      |   |           |             |    |              |                           |                       |                                                                                     |
|-----|------|---|-----------|-------------|----|--------------|---------------------------|-----------------------|-------------------------------------------------------------------------------------|
| 224 | Chlb | 1 | 181947110 | 97.49187685 | 6  | -0.41770935  | -2965 '26.19'             | grmzm2g023<br>847_t01 | 'misc.plastocyanin-like'                                                            |
| 225 | Chlb | 1 | 187131514 | 101.742233  | 14 | -0.546446647 | -1085 '27.3.11'           | grmzm2g445<br>684_t01 | 'RNA.regulation of<br>transcription.C2H2 zinc<br>finger family'                     |
| 226 | Chlb | 1 | 202975799 | 116.1587985 | 10 | -0.587258205 | -83915 '10.7'             | grmzm2g030<br>531_t01 | 'cell wall.modification'                                                            |
| 227 | Chlb | 1 | 205257253 | 117.519266  | 7  | -0.562896571 | -256995 '25.9'            | grmzm2g015<br>588_t01 | 'C1-<br>metabolism.dihydroneop<br>terin aldolase'                                   |
| 228 | Chlb | 1 | 225624776 | 133.6401321 | 12 | -0.665556716 | -17032 '19.2'             | ac213521.3_f<br>gt005 | 'tetrapyrrole<br>synthesis.glu-tRNA<br>reductase'                                   |
| 229 | Chlb | 1 | 228532522 | 135.6859584 | 17 | -0.333710526 | -5551 '17.1.3'            | grmzm2g113<br>167_t01 | 'hormone<br>metabolism.abscisic<br>acid.induced-regulated-<br>responsive-activated' |
| 230 | Chlb | 1 | 285864445 | 180.8598811 | 14 | -1.175768963 | '29.3.4.9<br>-85704 9'    | grmzm2g120<br>596_t01 | 'protein.targeting.secreto<br>ry pathway.unspecified'                               |
| 231 | Chlb | 1 | 291825337 | 191.0554431 | 5  | 1.628826253  | '29.2.1.2<br>-2579 .1.23' | ac225147.4_f<br>gt002 | 'protein.synthesis.riboso<br>mal<br>protein.eukaryotic.40S<br>subunit.S23'          |
| 232 | Chlb | 1 | 294322791 | 196.7251432 | 76 | 0.398027959  | -1237 '26.22'             | grmzm2g156<br>739_t01 | 'misc.short chain<br>dehydrogenase/reductase<br>(SDR)'                              |

|     |      |   |           |             |    |              |                   |                       |                                                                                   |
|-----|------|---|-----------|-------------|----|--------------|-------------------|-----------------------|-----------------------------------------------------------------------------------|
| 233 | Chlb | 1 | 294652893 | 197.2197826 | 22 | -15.83957184 | -7614 '20.2.1'    | grmzm2g114<br>673_t01 | 'stress.abiotic.heat'                                                             |
| 234 | Chlb | 1 | 296022922 | 199.7554621 | 13 | 5.61697755   | -88876 '33.99'    | grmzm2g118<br>014_t01 | 'development.unspecifie<br>d'                                                     |
| 235 | Chlb | 1 | 299894464 | 204.0221873 | 84 | 3.122396653  | -81247 '30.5'     | grmzm2g131<br>939_t01 | 'signalling.G-proteins'                                                           |
| 236 | Chlb | 2 | 5923229   | 18.30060959 | 6  | -0.432741117 | -21484 '34.18'    | grmzm2g071<br>119_t01 | 'transport.unspecified<br>anions'                                                 |
| 237 | Chlb | 2 | 6166067   | 18.83309554 | 9  | -0.313343721 | -2154 '34.16'     | grmzm2g072<br>850_t01 | 'transport.ABC<br>transporters and<br>multidrug resistance<br>systems'            |
| 238 | Chlb | 2 | 69741938  | 75.18951102 | 10 | 0.13773773   | -116268 '20.2.1'  | ac235541.1_f<br>gt002 | 'stress.abiotic.heat'                                                             |
| 239 | Chlb | 2 | 148856409 | 80.60314611 | 22 | 8.071915262  | -18560 '27.3.25'  | grmzm2g032<br>180_t01 | 'RNA.regulation of<br>transcription.MYB<br>domain transcription<br>factor family' |
| 240 | Chlb | 2 | 149429597 | 80.70039502 | 22 | -9.971712092 | -62312 '29.3.4.3' | grmzm2g389<br>362_t01 | 'protein.targeting.secreto<br>ry pathway.vacuole'                                 |
| 241 | Chlb | 2 | 161877261 | 82.49985253 | 8  | -4.135727968 | -41635 '20.2.2'   | ac210204.3_f<br>gt002 | 'stress.abiotic.cold'                                                             |

|     |      |   |           |             |    |             |         |             |                       |                                                                      |
|-----|------|---|-----------|-------------|----|-------------|---------|-------------|-----------------------|----------------------------------------------------------------------|
| 242 | Chlb | 2 | 172704855 | 85.0182288  | 5  | 0.153284287 | -30872  | '30.5'      | grmzm2g039<br>900_t01 | 'signalling.G-proteins'                                              |
| 243 | Chlb | 2 | 185915577 | 96.74331495 | 10 | 0.145544258 | -4122   | '29.5.5'    | grmzm2g703<br>293_t01 | 'protein.degradation.serine protease'                                |
| 244 | Chlb | 2 | 186273082 | 97.1970181  | 7  | 0.137513277 | -136321 | '30.2.11'   | ac233861.1_f<br>gt001 | 'signalling.receptor kinases.leucine rich repeat XI'                 |
| 245 | Chlb | 2 | 186375668 | 97.32720814 | 5  | 0.150539465 | -754    | '29.5.11.1' | grmzm2g353<br>446_t01 | 'protein.degradation.ubiquitin.ubiquitin'                            |
| 246 | Chlb | 2 | 191111571 | 102.3694697 | 8  | 0.135633799 | -150052 | '27.3.6'    | grmzm2g107<br>560_t01 | 'RNA.regulation of transcription.bHLH,Basic Helix-Loop-Helix family' |
| 247 | Chlb | 2 | 192123634 | 103.2729858 | 11 | 0.120175148 | -9108   | '27.2'      | grmzm2g034<br>260_t01 | 'RNA.transcription'                                                  |
| 248 | Chlb | 3 | 139536229 | 63.68477456 | 6  | 0.147217046 | -293942 | '20.1'      | grmzm2g368<br>151_t01 | 'stress.biotic'                                                      |
| 249 | Chlb | 3 | 144468014 | 65.40015782 | 12 | 0.134612198 | -2328   | '27.3.5'    | grmzm2g156<br>019_t01 | 'RNA.regulation of transcription.ARR'                                |

|     |      |   |           |             |    |              |         |                   |                       |                                                                                      |
|-----|------|---|-----------|-------------|----|--------------|---------|-------------------|-----------------------|--------------------------------------------------------------------------------------|
| 250 | Chlb | 3 | 147011536 | 66.05909566 | 44 | 0.123495734  | -103171 | '11.8'            | grmzm2g347<br>146_t01 | 'lipid<br>metabolism."exotics"<br>(steroids, squalene etc)'                          |
| 251 | Chlb | 3 | 148514014 | 66.58736723 | 21 | 0.148804648  | -132133 | '17.4.1'          | grmzm2g050<br>997_t01 | 'hormone<br>metabolism.cytokinin.sy<br>nthesis-degradation'                          |
| 252 | Chlb | 3 | 212765471 | 123.9963177 | 8  | -0.336927049 | -38896  | '34.15'           | grmzm2g022<br>915_t01 | 'transport.potassium'                                                                |
| 253 | Chlb | 3 | 216243829 | 131.9068925 | 14 | -0.259823327 | -2178   | '27.3.46'         | grmzm2g052<br>991_t01 | 'RNA.regulation of<br>transcription.DNA<br>methyltransferases'                       |
| 254 | Chlb | 4 | 10192700  | 27.53975118 | 5  | -0.334206161 | -180774 | '30.2.11'         | grmzm2g011<br>896_t02 | 'signalling.receptor<br>kinases.leucine rich<br>repeat XI'                           |
| 255 | Chlb | 4 | 10198136  | 27.55916751 | 33 | -0.283755098 | -2085   | '30.2.11'         | grmzm2g068<br>398_t01 | 'signalling.receptor<br>kinases.leucine rich<br>repeat XI'                           |
| 256 | Chlb | 4 | 10624506  | 29.08207781 | 6  | -0.499306784 | -107674 | '1.1.5.2'         | grmzm2g470<br>653_t01 | 'PS.lightreaction.other<br>electron carrier<br>(ox/red).ferredoxin'                  |
| 257 | Chlb | 4 | 154415397 | 65.4507691  | 5  | -0.310092928 | -62669  | '29.5.11.<br>4.2' | grmzm2g081<br>829_t01 | 'protein.degradation.ubiq<br>uitin.E3.RING'                                          |
| 258 | Chlb | 4 | 157107343 | 68.51092069 | 5  | -0.175013014 | -63015  | '27.3.20'         | grmzm2g070<br>865_t01 | 'RNA.regulation of<br>transcription.G2-like<br>transcription factor<br>family, GARP' |

|     |      |   |           |             |    |              |                 |                       |                                                                                                                    |
|-----|------|---|-----------|-------------|----|--------------|-----------------|-----------------------|--------------------------------------------------------------------------------------------------------------------|
| 259 | Chlb | 4 | 159175723 | 70.53286161 | 16 | -0.172099323 | -5436 '29.5.9'  | grmzm2g069<br>422_t01 | 'protein.degradation.AA<br>A type'<br>'hormone<br>metabolism.auxin.induce<br>d-regulated-responsive-<br>activated' |
| 260 | Chlb | 4 | 241996729 | 128.0064472 | 6  | 3.240118253  | -5449 '17.2.3'  | grmzm2g471<br>304_t01 |                                                                                                                    |
| 261 | Chlb | 4 | 242374367 | 129.5365429 | 7  | -2.331473365 | -26749 '30.5'   | grmzm2g101<br>920_t01 | 'signalling.G-proteins'                                                                                            |
| 262 | Chlb | 4 | 245553732 | 143.0029237 | 5  | 0.469486536  | -119198 '29.6'  | grmzm2g150<br>337_t03 | 'protein.folding'<br>'RNA.regulation of<br>transcription.C2H2 zinc<br>finger family'                               |
| 263 | Chlb | 5 | 2383652   | 5.193426861 | 6  | -0.572992605 | -330 '27.3.11'  | grmzm2g002<br>805_t01 |                                                                                                                    |
| 264 | Chlb | 5 | 6303981   | 23.51266789 | 6  | 0.790335738  | -11201 '29.4'   | grmzm2g034<br>877_t01 | 'protein.postranslational<br>modification'<br>'secondary<br>metabolism.isoprenoids.t<br>erpenoids'                 |
| 265 | Chlb | 5 | 20023828  | 50.73599959 | 10 | 0.15378392   | -76988 '16.1.5' | grmzm2g156<br>748_t01 |                                                                                                                    |
| 266 | Chlb | 5 | 26723660  | 54.83773092 | 24 | 0.136021297  | -473830 '26.10' | grmzm2g013<br>082_t01 | 'misc.cytochrome P450'<br>'transport.metabolite<br>transporters at the<br>mitochondrial<br>membrane'               |
| 267 | Chlb | 5 | 35357979  | 58.09472562 | 36 | 0.135646841  | -336772 '34.9'  | grmzm2g043<br>182_t01 |                                                                                                                    |
| 268 | Chlb | 5 | 45813768  | 59.90312559 | 5  | 0.138663161  | -60098 '30.1.1' | grmzm2g057<br>459_t01 | 'signalling.in sugar and<br>nutrient physiology'                                                                   |



|     |      |   |           |             |    |              |                                     |                       |                                                                                                                                     |
|-----|------|---|-----------|-------------|----|--------------|-------------------------------------|-----------------------|-------------------------------------------------------------------------------------------------------------------------------------|
| 269 | Chlb | 6 | 162877409 | 92.80071368 | 5  | 0.254136304  | '29.5.11. grmzm2g320<br>-84434 4.2' | 399_t01               | 'protein.degradation.ubiq<br>uitin.E3.RING'                                                                                         |
| 270 | Chlb | 7 | 1921276   | 4.495740497 | 6  | 0.440671843  | -123092 '26.13'                     | grmzm2g106<br>600_t01 | 'misc.acid and other<br>phosphatases'                                                                                               |
| 271 | Chlb | 7 | 2047654   | 4.972450239 | 9  | 0.308546552  | -64453 '27.3.67'                    | grmzm2g019<br>879_t01 | 'RNA.regulation of<br>transcription.putative<br>transcription regulator'                                                            |
| 272 | Chlb | 7 | 5043354   | 21.45653923 | 59 | -0.623660171 | -65874 '1.2.6'                      | grmzm2g040<br>090_t02 | 'PS.photorespiration.hyd<br>roxypyruvate reductase'                                                                                 |
| 273 | Chlb | 7 | 5299542   | 22.83360349 | 5  | -0.725829344 | -561 '34.2'                         | grmzm2g142<br>063_t03 | 'transport.sugars'<br>'cell<br>wall.degradation.pectate                                                                             |
| 274 | Chlb | 7 | 6484300   | 28.48085938 | 7  | -0.385308166 | -3347 '10.6.3'                      | grmzm2g032<br>145_t03 | lyases and<br>polygalacturonases'<br>'misc.protease<br>inhibitor/seed<br>storage/lipid transfer<br>protein (LTP) family<br>protein' |
| 275 | Chlb | 7 | 9145904   | 33.10358602 | 7  | -0.455155264 | -57306 '26.21'                      | grmzm2g046<br>750_t01 | 'misc.nitrilases, *nitrile<br>lyases, berberine bridge<br>enzymes, reticuline<br>oxidases, troponine<br>reductases'                 |
| 276 | Chlb | 7 | 142898891 | 81.10232141 | 46 | -0.930589021 | -7412 '26.8'                        | grmzm2g111<br>309_t01 | 'RNA.regulation of<br>transcription.MYB<br>domain transcription<br>factor family'                                                   |
| 277 | Chlb | 7 | 151513769 | 89.4065889  | 57 | 2.205527693  | -3032 '27.3.25'                     | grmzm2g031<br>323_t01 | 'transport.sugars'                                                                                                                  |
| 278 | Chlb | 7 | 152461246 | 91.18872855 | 6  | 0.1813481    | -824 '34.2'                         | grmzm2g089<br>493_t01 | 'transport.sugars'                                                                                                                  |

|     |      |   |           |             |    |              |         |                 |                       |                                                                      |
|-----|------|---|-----------|-------------|----|--------------|---------|-----------------|-----------------------|----------------------------------------------------------------------|
| 279 | Chlb | 7 | 157011468 | 100.2121602 | 5  | -1.389177806 | -209189 | '27.3.99'       | grmzm2g090<br>715_t01 | 'RNA.regulation of<br>transcription.unclassified<br>'                |
| 280 | Chlb | 7 | 157185116 | 100.5721631 | 5  | -1.554880555 | -103    | '29.5.3'        | grmzm2g036<br>203_t01 | 'protein.degradation.cyst<br>eine protease'                          |
| 281 | Chlb | 7 | 157532548 | 101.2924508 | 11 | -1.522378582 | -9296   | '27.3.44'       | grmzm2g313<br>553_t01 | 'RNA.regulation of<br>transcription.Chromatin<br>Remodeling Factors' |
| 282 | Chlb | 7 | 164316372 | 116.7981854 | 5  | -0.786680562 | -1620   | '29.5.11.<br>1' | grmzm2g055<br>527_t01 | 'protein.degradation.ubiq<br>uitin.ubiquitin'                        |
| 283 | Chlb | 7 | 167232557 | 126.3442442 | 8  | 0.152254886  | -1209   | '34.15'         | grmzm2g166<br>738_t01 | 'transport.potassium'                                                |
| 284 | Chlb | 7 | 167233412 | 126.3479602 | 14 | 0.1415427    | -2064   | '34.15'         | grmzm2g166<br>738_t01 | 'transport.potassium'                                                |
| 285 | Chlb | 8 | 926070    | 1.886736364 | 14 | 0.271650989  | -58379  | '19.9'          | grmzm2g039<br>396_t01 | 'tetrapyrrole<br>synthesis.protoporphyrin<br>IX oxidase'             |
| 286 | Chlb | 8 | 1359223   | 2.966202574 | 8  | 0.123826391  | -38     | '31.1'          | grmzm2g042<br>636_t01 | 'cell.organisation'                                                  |
| 287 | Chlb | 8 | 99959295  | 57.50014689 | 6  | -0.51065178  | -12771  | '28.99'         | ac199379.4_f<br>gt001 | 'DNA.unspecified'                                                    |

|     |      |   |           |             |    |              |         |           |                       |                                                                                                    |
|-----|------|---|-----------|-------------|----|--------------|---------|-----------|-----------------------|----------------------------------------------------------------------------------------------------|
| 288 | Chlb | 8 | 147589704 | 77.10076187 | 7  | -0.197854431 | -100178 | '29.5'    | grmzm2g000<br>719_t01 | 'protein.degradation'<br>'DNA.synthesis/chromati<br>n<br>structure.retrotransposon                 |
| 289 | Chlb | 8 | 147830284 | 77.29378758 | 5  | -0.28678081  | -2177   | '28.1.1.4 | grmzm2g126<br>917_t01 | /transposase.hat-like<br>transposase'<br>'DNA.synthesis/chromati<br>n<br>structure.retrotransposon |
| 290 | Chlb | 8 | 147830665 | 77.29409327 | 7  | -0.289989168 | -2558   | '28.1.1.4 | grmzm2g126<br>917_t01 | /transposase.hat-like<br>transposase'                                                              |
| 291 | Chlb | 8 | 152152815 | 80.797802   | 13 | -0.348119811 | -48527  | '20.2.1'  | grmzm2g469<br>901_t01 | 'stress.abiotic.heat'<br><br>'RNA.regulation of<br>transcription.Global                            |
| 292 | Chlb | 9 | 8793952   | 12.87388515 | 8  | -0.136620476 | -161345 | '27.3.52' | grmzm2g142<br>072_t01 | transcription factor<br>group'                                                                     |
| 293 | Chlb | 9 | 9141388   | 13.42304955 | 6  | -0.254049865 | -34377  | '17.5.1'  | grmzm2g066<br>358_t01 | 'hormone<br>metabolism.ethylene.synt<br>hesis-degradation'                                         |
| 294 | Chlb | 9 | 23231768  | 40.03154801 | 10 | -0.113528991 | -14079  | '2.1.2.2' | grmzm2g024<br>993_t01 | 'major CHO<br>metabolism.synthesis.sta<br>rch.starch synthase'                                     |
| 295 | Chlb | 9 | 25023438  | 42.41159442 | 6  | -0.114018927 | -3965   | '20.1'    | grmzm2g030<br>051_t01 | 'stress.biotic'                                                                                    |
| 296 | Chlb | 9 | 27036374  | 43.61692207 | 7  | -0.146623845 | -71307  | '33.99'   | grmzm2g168<br>214_t01 | 'development.unspecifie<br>d'                                                                      |

|     |      |    |           |             |    |              |         |            |                       |                                                                      |
|-----|------|----|-----------|-------------|----|--------------|---------|------------|-----------------------|----------------------------------------------------------------------|
| 297 | Chlb | 9  | 64396713  | 45.73393561 | 5  | -0.145382509 | -257847 | '27.3.6'   | grmzm2g045<br>109_t01 | 'RNA.regulation of transcription.bHLH,Basic Helix-Loop-Helix family' |
| 298 | Chlb | 9  | 74140456  | 45.9421654  | 15 | -2166.549455 | -198434 | '21.2.1'   | grmzm2g141<br>376_t01 | 'redox.ascorbate and glutathione.ascorbate'                          |
| 299 | Chlb | 9  | 85978653  | 46.6412055  | 5  | -0.164686897 | -89656  | '26.7'     | grmzm2g019<br>872_t01 | 'misc.oxidases - copper, flavone etc.'                               |
| 300 | Chlb | 9  | 147213879 | 101.7957515 | 8  | -0.318295344 | -59698  | '30.3'     | grmzm2g120<br>975_t01 | 'signalling.calcium'                                                 |
| 301 | Chlb | 10 | 107950213 | 44.02050592 | 22 | -0.311582186 | -2996   | '26.1'     | grmzm2g399<br>530_t01 | 'misc.misc2'<br>'nucleotide metabolism.deoxynucleotide               |
| 302 | Chlb | 10 | 118129854 | 47.02366267 | 15 | -0.228236332 | -262175 | '23.5.2'   | grmzm2g087<br>180_t01 | metabolism.pseudouridine synthase'                                   |
| 303 | Chlb | 10 | 119651031 | 47.40080838 | 7  | -0.115286868 | -150952 | '20.2.1'   | grmzm2g346<br>839_t01 | 'stress.abiotic.heat'                                                |
| 304 | Chlb | 10 | 129585091 | 52.11332474 | 32 | 0.256285226  | -4047   | '11.9.2.1' | grmzm2g377<br>641_t01 | 'lipid metabolism.lipid degradation.lipases.triacylglycerol lipase'  |
| 305 | Chlb | 10 | 132147651 | 55.92474833 | 6  | 0.240383766  | -502    | '31.4'     | grmzm2g040<br>902_t01 | 'cell.vesicle transport'                                             |
| 306 | Chlb | 10 | 148943495 | 104.5936596 | 7  | -0.338495455 | -36125  | '34.13'    | grmzm2g011<br>590_t01 | 'transport.peptides and oligopeptides'                               |

|     |      |    |           |             |    |              |         |           |                       |                                                                                                                        |
|-----|------|----|-----------|-------------|----|--------------|---------|-----------|-----------------------|------------------------------------------------------------------------------------------------------------------------|
| 307 | Chlb | 10 | 149647673 | 108.5410404 | 6  | -0.456258788 | -57680  | '10.2'    | grmzm2g178<br>025_t01 | 'cell wall.cellulose<br>synthesis'                                                                                     |
| 308 | Fruc | 1  | 16386798  | 32.84963222 | 6  | -0.013777599 | -533    | '20.2.99' | grmzm2g016<br>443_t01 | 'stress.abiotic.unspecifie<br>d'                                                                                       |
| 309 | Fruc | 1  | 16770481  | 33.28017346 | 30 | -0.015750944 | -27721  | '27.3.7'  | grmzm2g445<br>634_t01 | 'RNA.regulation of<br>transcription.C2C2(Zn)<br>CO-like, Constans-like<br>zinc finger family'                          |
| 310 | Fruc | 1  | 16775647  | 33.28405569 | 10 | -0.018370011 | -32887  | '27.3.7'  | grmzm2g445<br>634_t01 | 'RNA.regulation of<br>transcription.C2C2(Zn)<br>CO-like, Constans-like<br>zinc finger family'                          |
| 311 | Fruc | 1  | 17461111  | 33.79917927 | 6  | -0.014967229 | -6444   | '27.3.3'  | ac206951.3_f<br>gt016 | 'RNA.regulation of<br>transcription.AP2/EREB<br>P, APETALA2/Ethylene-<br>responsive element<br>binding protein family' |
| 312 | Fruc | 1  | 35272897  | 54.48195467 | 5  | -0.029642508 | -5161   | '33.1'    | grmzm2g030<br>223_t01 | 'development.storage<br>proteins'                                                                                      |
| 313 | Fruc | 1  | 44348772  | 60.58908186 | 7  | 0.029290518  | -11345  | '29.7'    | grmzm2g001<br>079_t01 | 'protein.glycosylation'                                                                                                |
| 314 | Fruc | 1  | 45121654  | 61.22096078 | 8  | 0.015684896  | -157836 | '11.2.3'  | grmzm2g074<br>401_t01 | 'lipid metabolism.FA<br>desaturation.omega 3<br>desaturase'                                                            |

|     |      |   |          |             |    |              |         |              |                       |                                                                            |
|-----|------|---|----------|-------------|----|--------------|---------|--------------|-----------------------|----------------------------------------------------------------------------|
| 315 | Fruc | 1 | 45567426 | 61.52614689 | 14 | 0.019975229  | -3279   | '34.9'       | ac208201.3_f<br>gt001 | 'transport.metabolite<br>transporters at the<br>mitochondrial<br>membrane' |
| 316 | Fruc | 1 | 46712396 | 62.60179969 | 5  | 0.013786727  | -34913  | '29.5.11.20' | grmzm2g104<br>373_t01 | 'protein.degradation.ubiq<br>uitin.proteasom'                              |
| 317 | Fruc | 1 | 57438776 | 70.59917107 | 14 | 0.013567425  | -78818  | '33.99'      | grmzm2g107<br>597_t01 | 'development.unspecifie<br>d'                                              |
| 318 | Fruc | 1 | 95550141 | 86.84633266 | 14 | 0.034688611  | -17787  | '31.1'       | grmzm2g379<br>550_t01 | 'cell.organisation'                                                        |
| 319 | Fruc | 2 | 3327524  | 8.176087352 | 9  | -0.011446215 | -108672 | '2.2.1.3.2'  | grmzm2g018<br>692_t01 | 'major CHO<br>metabolism.degradation.<br>sucrose.invertases.cell<br>wall'  |
| 320 | Fruc | 2 | 3529245  | 9.556599097 | 7  | -0.011598842 | -126893 | '30.3'       | grmzm2g348<br>909_t01 | 'signalling.calcium'                                                       |
| 321 | Fruc | 2 | 3534327  | 9.591591385 | 10 | -0.012952906 | -131975 | '30.3'       | grmzm2g348<br>909_t01 | 'signalling.calcium'                                                       |
| 322 | Fruc | 2 | 3794582  | 10.51648703 | 20 | -0.013392911 | -22878  | '29.4'       | grmzm2g017<br>654_t01 | 'protein.postranslational<br>modification'                                 |

|     |      |   |           |             |    |              |                       |                       |                                                                                                 |
|-----|------|---|-----------|-------------|----|--------------|-----------------------|-----------------------|-------------------------------------------------------------------------------------------------|
| 323 | Fruc | 2 | 4042572   | 11.15390606 | 18 | -0.012020005 | -3178 '30.2.17'       | grmzm2g391<br>741_t01 | 'signalling.receptor<br>kinases.DUF 26'                                                         |
| 324 | Fruc | 2 | 4663012   | 13.34691454 | 5  | -0.011982641 | '29.4.1.5<br>-160 7'  | grmzm2g086<br>577_t02 | 'protein.postranslational<br>modification.kinase.rece<br>ptor like cytoplasmatic<br>kinase VII' |
| 325 | Fruc | 2 | 34001062  | 63.56397414 | 5  | -0.011897479 | -26900 '20.1'         | grmzm2g051<br>921_t01 | 'stress.biotic'<br>'RNA.regulation of<br>transcription.TCP                                      |
| 326 | Fruc | 2 | 177151781 | 87.86279241 | 10 | 0.034341476  | -69726 '27.3.29'      | grmzm2g110<br>242_t01 | transcription factor<br>family'<br>'RNA.regulation of<br>transcription.bHLH,Basi                |
| 327 | Fruc | 2 | 177266143 | 87.95845923 | 6  | 0.046944656  | -8092 '27.3.6'        | grmzm2g176<br>141_t01 | c Helix-Loop-Helix<br>family'                                                                   |
| 328 | Fruc | 2 | 181271307 | 91.1333845  | 7  | 0.046476341  | -2251 '5.1'           | grmzm2g130<br>440_t02 | 'fermentation.LDH'                                                                              |
| 329 | Fruc | 3 | 3386685   | 11.10786166 | 29 | -0.021944149 | '29.3.4.4<br>-29190 ' | grmzm2g102<br>795_t01 | 'protein.targeting.secreto<br>ry pathway.plasma<br>membrane'                                    |
| 330 | Fruc | 3 | 3903533   | 13.78234035 | 18 | -0.016091322 | -29382 '34.3'         | grmzm2g146<br>161_t01 | 'transport.amino acids'                                                                         |

|     |      |   |           |             |    |              |         |           |                       |                                                                                 |
|-----|------|---|-----------|-------------|----|--------------|---------|-----------|-----------------------|---------------------------------------------------------------------------------|
| 331 | Fruc | 3 | 4856540   | 18.3470876  | 47 | -0.014548164 | -28145  | '27.3.24' | grmzm2g471<br>089_t01 | 'RNA.regulation of<br>transcription.MADS box<br>transcription factor<br>family' |
| 332 | Fruc | 3 | 49918968  | 56.54435347 | 26 | -0.016411713 | -219688 | '34.16'   | grmzm2g119<br>894_t01 | 'transport.ABC<br>transporters and<br>multidrug resistance<br>systems'          |
| 333 | Fruc | 3 | 171723196 | 82.25684086 | 47 | 0.040642762  | -91194  | '20.2.99' | grmzm2g060<br>255_t01 | 'stress.abiotic.unspecifie<br>d'                                                |
| 334 | Fruc | 3 | 172148591 | 82.5754152  | 7  | 0.064075885  | -1652   | '34.10'   | grmzm2g037<br>229_t01 | 'transport.nucleotides'                                                         |
| 335 | Fruc | 3 | 173110658 | 83.38629476 | 18 | 0.042818427  | -67819  | '28.2'    | grmzm2g002<br>626_t01 | 'DNA.repair'                                                                    |
| 336 | Fruc | 3 | 173219900 | 83.47836954 | 11 | 0.066010087  | -10226  | '1.1.1.2' | grmzm2g077<br>333_t01 | 'PS.lightreaction.photosy<br>stem II.PSII polypeptide<br>subunits'              |
| 337 | Fruc | 3 | 195593529 | 103.3189453 | 7  | 0.02012706   | -79521  | '23.1.1.3 | grmzm2g021<br>704_t03 | 'nucleotide<br>metabolism.synthesis.pyr<br>imidine.dihydroorotase'              |
| 338 | Fruc | 3 | 196183579 | 103.6950757 | 5  | 0.011501099  | -75396  | '3.2.3'   | grmzm2g304<br>274_t01 | 'minor CHO<br>metabolism.trehalose.pot<br>ential TPS/TPP'                       |
| 339 | Fruc | 3 | 219127882 | 135.874024  | 20 | -0.018693012 | -461    | '29.5.3'  | grmzm2g371<br>628_t01 | 'protein.degradation.cyst<br>eine protease'                                     |



|     |      |   |           |             |    |              |                   |                       |                                                                                                          |
|-----|------|---|-----------|-------------|----|--------------|-------------------|-----------------------|----------------------------------------------------------------------------------------------------------|
| 340 | Fruc | 3 | 221010928 | 139.3762734 | 18 | -0.017339804 | -2081 '26.24'     | grmzm2g333<br>775_t01 | 'misc.GCN5-related N-acetyltransferase'                                                                  |
| 341 | Fruc | 4 | 596627    | 2.14232426  | 45 | 0.025189271  | -81396 '27.3.21'  | grmzm2g018<br>254_t01 | 'RNA.regulation of transcription.GRAS transcription factor family'                                       |
| 342 | Fruc | 4 | 101026208 | 57.83942086 | 5  | -0.028462957 | -385858 '29.3.1'  | grmzm2g008<br>497_t01 | 'protein.targeting.nucleus'                                                                              |
| 343 | Fruc | 4 | 109554972 | 58.01578487 | 6  | -0.014600631 | -223522 '27.3.35' | grmzm2g118<br>870_t02 | 'RNA.regulation of transcription.bZIP transcription factor family'                                       |
| 344 | Fruc | 4 | 118225032 | 58.20188033 | 8  | -0.015380681 | -331981 '27.3.3'  | grmzm2g139<br>740_t01 | 'RNA.regulation of transcription.AP2/EREBP, APETALA2/Ethylene-responsive element binding protein family' |
| 345 | Fruc | 4 | 121592260 | 58.27415502 | 6  | -0.012488902 | -97602 '24'       | grmzm2g128<br>219_t01 | 'Biodegradation of Xenobiotics'                                                                          |
| 346 | Fruc | 4 | 121913511 | 58.2810504  | 6  | -0.014513129 | -218457 '27.3.99' | grmzm2g069<br>678_t01 | 'RNA.regulation of transcription.unclassified'                                                           |
| 347 | Fruc | 4 | 122028538 | 58.28351935 | 8  | -0.012822806 | '29.5.11. 4.2'    | grmzm2g041<br>344_t01 | 'protein.degradation.ubiquitin.E3.RING'                                                                  |
| 348 | Fruc | 4 | 125159697 | 58.42149244 | 5  | -0.016269091 | -6839 '30.7'      | grmzm2g095<br>397_t01 | 'signalling.14-3-3 proteins'                                                                             |

|     |      |   |           |             |    |              |         |                 |                       |                                                                    |
|-----|------|---|-----------|-------------|----|--------------|---------|-----------------|-----------------------|--------------------------------------------------------------------|
| 349 | Fruc | 4 | 139805548 | 59.87084184 | 6  | -0.013396769 | -336601 | '30.5'          | grmzm2g079<br>817_t01 | 'signalling.G-proteins'                                            |
| 350 | Fruc | 4 | 144536877 | 60.82876771 | 5  | -0.01193395  | -48049  | '29.5.11.3'     | grmzm2g161<br>545_t01 | 'protein.degradation.ubiquitin.E2'                                 |
| 351 | Fruc | 4 | 170738228 | 78.91944426 | 9  | -0.027117788 | -1766   | '26.28'         | grmzm2g384<br>780_t01 | 'misc.GDSL-motif lipase'                                           |
| 352 | Fruc | 4 | 172300218 | 81.59892215 | 15 | -0.0185491   | -15126  | '20.2.1'        | grmzm2g054<br>076_t01 | 'stress.abiotic.heat'                                              |
| 353 | Fruc | 4 | 240477479 | 123.4579602 | 5  | -0.05014372  | -32189  | '29.4'          | grmzm2g062<br>683_t01 | 'protein.postranslational modification'                            |
| 354 | Fruc | 5 | 1571929   | 2.012971503 | 16 | -0.012617453 | -131    | '29.2.1.2.1.21' | grmzm2g125<br>300_t01 | 'protein.synthesis.ribosomal protein.eukaryotic.40S subunit.S21'   |
| 355 | Fruc | 5 | 2279196   | 4.510973125 | 8  | -0.011842701 | -12128  | '30.5'          | grmzm2g144<br>008_t01 | 'signalling.G-proteins'                                            |
| 356 | Fruc | 5 | 2358292   | 5.027739617 | 38 | -0.013396885 | -9114   | '27.3.8'        | grmzm2g144<br>188_t01 | 'RNA.regulation of transcription.C2C2(Zn) DOF zinc finger family'  |
| 357 | Fruc | 5 | 2367917   | 5.090623676 | 8  | -0.012236849 | -2750   | '27.3.67'       | grmzm2g003<br>068_t01 | 'RNA.regulation of transcription.putative transcription regulator' |

|     |      |   |           |             |    |              |                  |                       |                                                                                                          |
|-----|------|---|-----------|-------------|----|--------------|------------------|-----------------------|----------------------------------------------------------------------------------------------------------|
| 358 | Fruc | 5 | 163819573 | 76.76334725 | 49 | 0.022715483  | -1683 '28.1'     | grmzm2g011<br>631_t01 | 'DNA.synthesis/chromatin structure'                                                                      |
| 359 | Fruc | 5 | 166171297 | 78.20073394 | 5  | 0.023811543  | -244497 '27.3.3' | grmzm2g047<br>999_t01 | 'RNA.regulation of transcription.AP2/EREBP, APETALA2/Ethylene-responsive element binding protein family' |
| 360 | Fruc | 5 | 204526436 | 116.1640652 | 41 | 0.018975985  | -7287 '17.4.2'   | grmzm2g151<br>223_t02 | 'hormone metabolism.cytokinin signal transduction'                                                       |
| 361 | Fruc | 5 | 206993797 | 123.8406652 | 29 | 0.022620899  | -925 '29.5.4'    | grmzm2g335<br>978_t02 | 'protein.degradation.aspartate protease'                                                                 |
| 362 | Fruc | 5 | 210780527 | 134.226701  | 7  | 0.0157951    | -19553 '31.1'    | grmzm2g385<br>925_t01 | 'cell.organisation'                                                                                      |
| 363 | Fruc | 5 | 214945363 | 152.2635928 | 8  | 0.024738523  | -5270 '20.1'     | grmzm2g013<br>848_t01 | 'stress.biotic'<br>'lipid metabolism."exotics" (steroids, squalene etc).sphingolipids'                   |
| 364 | Fruc | 6 | 83413352  | 12.31842953 | 47 | -0.016984936 | -1670 '11.8.1'   | grmzm2g417<br>009_t01 | 'protein.degradation.ubiquitin.E3.BTB/POZ Cullin3.BTB/POZ'                                               |
| 365 | Fruc | 6 | 93728026  | 20.25312295 | 19 | -0.018294395 | '29.5.11.4.5.2'  | grmzm2g161<br>610_t01 | 'RNA.regulation of transcription.C2C2(Zn) CO-like, Constans-like zinc finger family'                     |
| 366 | Fruc | 6 | 117587976 | 42.56198959 | 5  | -0.03397919  | -81659 '27.3.7'  | grmzm2g012<br>717_t01 |                                                                                                          |

|          |   |           |             |    |              |                        |                       |                                                       |
|----------|---|-----------|-------------|----|--------------|------------------------|-----------------------|-------------------------------------------------------|
| 367 Fruc | 6 | 119772986 | 44.24786955 | 23 | -0.033796984 | -90952 '26.19'         | grmzm2g148<br>624_t01 | 'misc.plastocyanin-like'                              |
| 368 Fruc | 6 | 124203584 | 45.80014821 | 9  | -0.025280441 | -40062 '1.3.1'         | grmzm2g122<br>563_t01 | 'PS.calvin cycle.rubisco<br>large subunit'            |
| 369 Fruc | 6 | 128598095 | 47.52042761 | 5  | -0.033664993 | -979 '31.1'            | grmzm2g341<br>155_t01 | 'cell.organisation'                                   |
| 370 Fruc | 6 | 165119716 | 101.3985908 | 6  | 0.036582506  | -1681 '29.5.4'         | grmzm2g065<br>757_t02 | 'protein.degradation.aspa<br>rtate protease'          |
| 371 Fruc | 6 | 166794282 | 106.9690738 | 8  | -0.011678556 | -2978 '31.2'           | grmzm2g059<br>037_t01 | 'cell.division'                                       |
| 372 Fruc | 6 | 166794417 | 106.9695432 | 5  | -0.01610415  | -3113 '31.2'           | grmzm2g059<br>037_t01 | 'cell.division'                                       |
| 373 Fruc | 7 | 6022883   | 26.56544125 | 7  | -0.013079036 | -55669 '27.4'          | grmzm2g026<br>614_t01 | 'RNA.RNA binding'                                     |
| 374 Fruc | 7 | 9213492   | 33.2209742  | 16 | -0.018141284 | -66352 '28.1'          | grmzm2g004<br>301_t01 | 'DNA.synthesis/chromati<br>n structure'               |
| 375 Fruc | 7 | 20233795  | 44.69829015 | 10 | -0.017981407 | '29.3.4.9<br>-72625 9' | grmzm2g105<br>996_t01 | 'protein.targeting.secreto<br>ry pathway.unspecified' |

|          |   |           |              |    |              |                             |                       |                                                                        |
|----------|---|-----------|--------------|----|--------------|-----------------------------|-----------------------|------------------------------------------------------------------------|
| 376 Fruc | 7 | 21622999  | 45.56317348  | 15 | -0.018042126 | -84794 '34.3'               | grmzm2g173<br>967_t01 | 'transport.amino acids'                                                |
| 377 Fruc | 7 | 32630669  | 47.75472755  | 8  | -0.017704491 | '29.5.11.<br>-237974 4.3.2' | grmzm2g012<br>508_t01 | 'protein.degradation.ubiq<br>uitin.E3.SCF.FBOX'                        |
| 378 Fruc | 7 | 84574592  | 49.92029539  | 9  | -0.01885016  | -67361 '30.2.99'            | grmzm2g354<br>615_t01 | 'signalling.receptor<br>kinases.misc'                                  |
| 379 Fruc | 7 | 86294238  | 49.99529999  | 25 | -0.016277961 | -89760 '34.16'              | grmzm2g355<br>523_t01 | 'transport.ABC<br>transporters and<br>multidrug resistance<br>systems' |
| 380 Fruc | 7 | 86760483  | 50.01070124  | 5  | -0.018393153 | -76255 '18'                 | grmzm2g022<br>837_t01 | 'Co-factor and vitamine<br>metabolism'                                 |
| 381 Fruc | 7 | 95364029  | 50.42762301  | 14 | -0.019020479 | -3782 '34.99'               | grmzm2g176<br>780_t01 | 'transport.misc'                                                       |
| 382 Fruc | 7 | 109178008 | 55.19093714  | 5  | -0.016770261 | -225062 '27.4'              | grmzm2g042<br>006_t02 | 'RNA.RNA binding'                                                      |
| 383 Fruc | 7 | 156688517 | 99.54262593  | 5  | 0.025852571  | -7082 '27.3.11'             | ac185108.3_f<br>gt011 | 'RNA.regulation of<br>transcription.C2H2 zinc<br>finger family'        |
| 384 Fruc | 9 | 2701441   | -3.388186607 | 10 | -0.03407797  | -280728 '27.1.19'           | grmzm2g016<br>275_t01 | 'RNA.processing.ribonuc<br>leases'                                     |

|     |      |    |           |             |    |              |         |                 |                       |                                                                                                 |
|-----|------|----|-----------|-------------|----|--------------|---------|-----------------|-----------------------|-------------------------------------------------------------------------------------------------|
| 385 | Fruc | 9  | 5619750   | 4.494331447 | 5  | -0.026190353 | -139829 | '27.3.24'       | grmzm2g152<br>415_t01 | 'RNA.regulation of<br>transcription.MADS box<br>transcription factor<br>family'                 |
| 386 | Fruc | 9  | 9558874   | 14.08293641 | 31 | -0.038288541 | -41185  | '27.3.11'       | grmzm2g159<br>402_t01 | 'RNA.regulation of<br>transcription.C2H2 zinc<br>finger family'                                 |
| 387 | Fruc | 9  | 10186494  | 15.44407336 | 7  | -0.018017282 | -142075 | '29.4.1.5<br>7' | grmzm2g055<br>982_t01 | 'protein.postranslational<br>modification.kinase.rece<br>ptor like cytoplasmatic<br>kinase VII' |
| 388 | Fruc | 9  | 21993322  | 38.82079896 | 27 | -0.037006124 | -9583   | '27.3.25'       | grmzm2g449<br>056_t01 | 'RNA.regulation of<br>transcription.MYB<br>domain transcription<br>factor family'               |
| 389 | Fruc | 9  | 142204786 | 87.72532368 | 30 | -0.022131324 | -83140  | '10.6.3'        | grmzm2g034<br>835_t01 | 'cell<br>wall.degradation.pectate<br>lyases and<br>polygalacturonases'                          |
| 390 | Fruc | 9  | 143828279 | 91.48003191 | 5  | -0.020830478 | -34082  | '20.2.3'        | grmzm2g181<br>551_t01 | 'stress.abiotic.drought/sal<br>t'                                                               |
| 391 | Fruc | 9  | 145268207 | 95.10905936 | 8  | -0.014832567 | -4590   | '27.3.22'       | ac233899.1_f<br>gt004 | 'RNA.regulation of<br>transcription.HB,Homeo<br>box transcription factor<br>family'             |
| 392 | Fruc | 10 | 5058530   | 14.79019912 | 28 | -0.045641719 | -2015   | '13'            | grmzm2g066<br>496_t01 | 'amino acid metabolism'                                                                         |

|     |      |    |           |             |    |              |         |                      |                       |                                                                                             |
|-----|------|----|-----------|-------------|----|--------------|---------|----------------------|-----------------------|---------------------------------------------------------------------------------------------|
| 393 | Fruc | 10 | 5258877   | 16.0525304  | 31 | -0.045423584 | -4552   | '29.3.4.1<br>093_t01 | grmzm2g113            | 'protein.targeting.secreto<br>ry pathway.ER'                                                |
| 394 | Fruc | 10 | 5571203   | 17.95328644 | 17 | -0.045237542 | -31427  | '27.1'               | grmzm2g131<br>120_t01 | 'RNA.processing'                                                                            |
| 395 | Fruc | 10 | 11480453  | 29.34116571 | 8  | -0.038039626 | -273511 | '2.2.1.3.<br>1'      | grmzm2g040<br>843_t01 | 'major CHO<br>metabolism.degradation.<br>sucrose.invertases.neutra<br>l'                    |
| 396 | Fruc | 10 | 134630447 | 59.4071156  | 7  | -0.017295414 | -863    | '29.5.11.<br>4.2'    | grmzm2g031<br>280_t01 | 'protein.degradation.ubiq<br>uitin.E3.RING'                                                 |
| 397 | Fuma | 1  | 195285519 | 108.2877857 | 22 | 0.010497833  | -1708   | '8.1.1.1'            | grmzm2g043<br>198_t01 | 'TCA / org.<br>transformation.TCA.pyr<br>uvate DH.E1'                                       |
| 398 | Fuma | 1  | 195634638 | 108.6089505 | 6  | 0.010552372  | -13265  | '17.2.3'             | grmzm2g020<br>631_t01 | 'hormone<br>metabolism.auxin.induce<br>d-regulated-responsive-<br>activated'                |
| 399 | Fuma | 1  | 196048817 | 109.0223788 | 6  | 0.007421199  | -249    | '31.4'               | grmzm2g353<br>483_t01 | 'cell.vesicle transport'<br>'RNA.regulation of<br>transcription.C2H2 zinc<br>finger family' |
| 400 | Fuma | 1  | 205544235 | 117.795721  | 14 | -0.006686224 | -286271 | '27.3.11'            | grmzm2g104<br>516_t01 |                                                                                             |
| 401 | Fuma | 1  | 205766088 | 118.0094361 | 13 | -0.004995746 | -138884 | '25.9'               | grmzm2g095<br>579_t01 | 'C1-<br>metabolism.dihydroneop<br>terin aldolase'                                           |

|          |   |           |             |    |              |                   |                       |                                                                                     |
|----------|---|-----------|-------------|----|--------------|-------------------|-----------------------|-------------------------------------------------------------------------------------|
| 402 Fuma | 1 | 206425614 | 118.6447696 | 17 | -0.005436419 | -55079 '27.3.25'  | grmzm2g084<br>583_t01 | 'RNA.regulation of<br>transcription.MYB<br>domain transcription<br>factor family'   |
| 403 Fuma | 1 | 207121477 | 119.3151072 | 6  | -0.00753724  | -98025 '7.1.2'    | grmzm2g122<br>126_t01 | 'OPP.oxidative PP.6-<br>phosphogluconolactonas<br>e'                                |
| 404 Fuma | 1 | 208533778 | 120.6233059 | 7  | -0.007359341 | -2498 '16.2'      | grmzm2g059<br>465_t01 | 'secondary<br>metabolism.phenylpropa<br>noids'                                      |
| 405 Fuma | 1 | 208593470 | 120.672802  | 13 | -0.004806602 | -1525 '17.2.3'    | grmzm2g460<br>861_t01 | 'hormone<br>metabolism.auxin.induce<br>d-regulated-responsive-<br>activated'        |
| 406 Fuma | 1 | 272244444 | 164.542002  | 10 | 0.003610726  | -137417 '27.3.22' | grmzm2g396<br>114_t01 | 'RNA.regulation of<br>transcription.HB,Homeo<br>box transcription factor<br>family' |
| 407 Fuma | 1 | 272244581 | 164.5421084 | 19 | 0.003781599  | -137554 '27.3.22' | grmzm2g396<br>114_t01 | 'RNA.regulation of<br>transcription.HB,Homeo<br>box transcription factor<br>family' |
| 408 Fuma | 1 | 289899574 | 186.9723092 | 6  | 0.002963805  | -17296 '20.1'     | grmzm2g402<br>765_t01 | 'stress.biotic'                                                                     |
| 409 Fuma | 2 | 5934701   | 18.32576495 | 5  | 0.014046764  | -7458 '29.5.11'   | grmzm2g070<br>881_t01 | 'protein.degradation.ubiq<br>uitin'                                                 |
| 410 Fuma | 2 | 26788878  | 58.0564637  | 8  | -0.007537765 | -93162 '27.1'     | grmzm2g171<br>410_t01 | 'RNA.processing'                                                                    |



|          |   |           |             |   |              |                             |                       |                                                                                                          |
|----------|---|-----------|-------------|---|--------------|-----------------------------|-----------------------|----------------------------------------------------------------------------------------------------------|
| 411 Fuma | 2 | 40887517  | 67.93546257 | 5 | -0.004119967 | -2125 '31.2'                | grmzm2g177<br>070_t01 | 'cell.division'                                                                                          |
| 412 Fuma | 2 | 101178551 | 76.43228188 | 6 | -0.003508264 | -123480 '33.99'             | grmzm2g149<br>708_t01 | 'development.unspecifie<br>d'                                                                            |
| 413 Fuma | 2 | 126037868 | 77.45026254 | 6 | -0.002840198 | '29.5.11.<br>-394672 4.3.2' | grmzm2g365<br>677_t01 | 'protein.degradation.ubiq<br>uitin.E3.SCF.FBOX'                                                          |
| 414 Fuma | 2 | 126357762 | 77.49091538 | 7 | -0.003825335 | -184159 '23.4.10'           | grmzm2g001<br>524_t01 | 'nucleotide<br>metabolism.phosphotran<br>sfer and<br>pyrophosphatases.nucleo<br>side diphosphate kinase' |
| 415 Fuma | 2 | 128572754 | 77.77240149 | 5 | 0.006664527  | -384 '12.1.1'               | grmzm2g424<br>659_t01 | 'N-metabolism.nitrate<br>metabolism.NR'                                                                  |
| 416 Fuma | 2 | 140085774 | 79.23550166 | 9 | -0.003129574 | '29.5.11.<br>-736 1'        | grmzm2g168<br>829_t01 | 'protein.degradation.ubiq<br>uitin.ubiquitin'                                                            |
| 417 Fuma | 2 | 209368892 | 120.1686122 | 5 | -0.003179256 | -1096 '27.2'                | grmzm2g086<br>805_t01 | 'RNA.transcription'                                                                                      |
| 418 Fuma | 2 | 210076932 | 121.1450848 | 6 | -0.005447489 | -59 '31.4'                  | grmzm2g102<br>903_t02 | 'cell.vesicle transport'                                                                                 |
| 419 Fuma | 3 | 27871359  | 53.36404037 | 8 | -0.003866516 | -167415 '29.4'              | grmzm2g012<br>472_t01 | 'protein.postranslational<br>modification'                                                               |

|          |   |           |             |    |              |                 |                       |                                                                              |
|----------|---|-----------|-------------|----|--------------|-----------------|-----------------------|------------------------------------------------------------------------------|
| 420 Fuma | 3 | 223869464 | 146.0056611 | 18 | 0.010366321  | -1856 '29.4'    | grmzm2g061<br>681_t02 | 'protein.postranslational<br>modification'                                   |
| 421 Fuma | 3 | 223869468 | 146.0056712 | 5  | 0.01094552   | -1860 '29.4'    | grmzm2g061<br>681_t02 | 'protein.postranslational<br>modification'                                   |
| 422 Fuma | 4 | 3544388   | 12.18913098 | 8  | -0.013932612 | -134069 '34.14' | grmzm2g037<br>342_t01 | 'transport.unspecified<br>cations'                                           |
| 423 Fuma | 4 | 4653906   | 15.97068346 | 12 | -0.008852558 | -40373 '34.2'   | grmzm2g157<br>057_t01 | 'transport.sugars'                                                           |
| 424 Fuma | 4 | 4655407   | 15.97579929 | 7  | -0.008673224 | -41874 '34.2'   | grmzm2g157<br>057_t01 | 'transport.sugars'                                                           |
| 425 Fuma | 4 | 168642940 | 76.90973825 | 5  | -0.005552603 | -39399 '17.2.3' | grmzm2g025<br>671_t01 | 'hormone<br>metabolism.auxin.induce<br>d-regulated-responsive-<br>activated' |
| 426 Fuma | 4 | 177728199 | 89.41877612 | 10 | -0.003560153 | -43695 '10.3'   | grmzm2g471<br>594_t01 | 'cell wall.hemicellulose<br>synthesis'                                       |
| 427 Fuma | 4 | 177733636 | 89.446853   | 10 | -0.002949415 | -49132 '10.3'   | grmzm2g471<br>594_t01 | 'cell wall.hemicellulose<br>synthesis'                                       |

|          |   |           |             |    |              |         |           |                       |                                                                                |
|----------|---|-----------|-------------|----|--------------|---------|-----------|-----------------------|--------------------------------------------------------------------------------|
| 428 Fuma | 4 | 179860377 | 92.79034271 | 8  | -0.003276803 | -139690 | '27.3.99' | grmzm2g101<br>518_t01 | 'RNA.regulation of<br>transcription.unclassified<br>'                          |
| 429 Fuma | 4 | 180517470 | 93.4957277  | 5  | -0.002716131 | -6587   | '29.5.11' | grmzm2g025<br>470_t01 | 'protein.degradation.ubiq<br>uitin'                                            |
| 430 Fuma | 4 | 182201693 | 95.89453425 | 8  | -0.004834603 | -62211  | '26.2'    | grmzm2g021<br>401_t01 | 'misc.UDP glucosyl and<br>glucoronyl transferases'                             |
| 431 Fuma | 4 | 182528229 | 96.35961321 | 8  | -0.003345301 | -46446  | '33.99'   | grmzm2g111<br>720_t02 | 'development.unspecifie<br>d'                                                  |
| 432 Fuma | 4 | 182976299 | 96.99779073 | 7  | -0.002979929 | -164793 | '27.3.99' | grmzm2g089<br>876_t01 | 'RNA.regulation of<br>transcription.unclassified<br>'                          |
| 433 Fuma | 4 | 230346458 | 113.6832878 | 23 | 0.006178358  | -125654 | '27.3.6'  | grmzm2g085<br>751_t01 | 'RNA.regulation of<br>transcription.bHLH,Basi<br>c Helix-Loop-Helix<br>family' |
| 434 Fuma | 4 | 234235715 | 115.012717  | 20 | 0.005063297  | -229    | '30.11'   | grmzm2g019<br>358_t01 | 'signalling.light'                                                             |
| 435 Fuma | 4 | 244607562 | 137.8307023 | 33 | -0.006210745 | -31906  | '31.1'    | grmzm2g019<br>838_t01 | 'cell.organisation'<br>'RNA.regulation of<br>transcription.WRKY                |
| 436 Fuma | 5 | 6670422   | 24.85176321 | 8  | 0.008168665  | -119238 | '27.3.32' | grmzm2g089<br>696_t01 | domain transcription<br>factor family'                                         |

|          |   |           |             |    |              |                  |                       |                                                                             |
|----------|---|-----------|-------------|----|--------------|------------------|-----------------------|-----------------------------------------------------------------------------|
| 437 Fuma | 5 | 6828578   | 25.41836288 | 5  | 0.002267897  | -5713 '30.2.99'  | grmzm2g072<br>658_t01 | 'signalling.receptor<br>kinases.misc'                                       |
| 438 Fuma | 5 | 7550141   | 28.65678582 | 8  | 0.004885718  | -30512 '31.4'    | grmzm2g147<br>046_t01 | 'cell.vesicle transport'                                                    |
| 439 Fuma | 5 | 9280217   | 30.80111555 | 6  | 0.003874816  | -134301 '20.2.1' | grmzm2g129<br>700_t02 | 'stress.abiotic.heat'                                                       |
| 440 Fuma | 5 | 10073594  | 32.64114173 | 7  | 0.003647227  | -12829 '30.11'   | grmzm2g181<br>028_t01 | 'signalling.light'                                                          |
| 441 Fuma | 5 | 10073765  | 32.64153832 | 28 | 0.003494537  | -13000 '30.11'   | grmzm2g181<br>028_t01 | 'signalling.light'                                                          |
| 442 Fuma | 5 | 10085671  | 32.66915111 | 5  | 0.00489814   | -24906 '30.11'   | grmzm2g181<br>028_t01 | 'signalling.light'                                                          |
| 443 Fuma | 6 | 165445511 | 102.4790375 | 8  | -0.005808279 | -2460 '27.3.35'  | grmzm2g011<br>932_t05 | 'RNA.regulation of<br>transcription.bZIP<br>transcription factor<br>family' |
| 444 Fuma | 7 | 57117438  | 49.15463724 | 6  | -0.006367934 | -229110 '31.4'   | grmzm2g043<br>758_t01 | 'cell.vesicle transport'                                                    |
| 445 Fuma | 7 | 129970942 | 70.62091409 | 6  | -0.005265067 | -6805 '27.4'     | grmzm2g463<br>359_t01 | 'RNA.RNA binding'                                                           |

|          |    |           |             |    |             |                                         |                       |                                                                   |
|----------|----|-----------|-------------|----|-------------|-----------------------------------------|-----------------------|-------------------------------------------------------------------|
| 446 Fuma | 7  | 159657824 | 105.8008762 | 37 | 0.003170054 | -27580 '34.2'                           | grmzm2g377<br>502_t01 | 'transport.sugars'                                                |
| 447 Fuma | 7  | 162478003 | 113.1505321 | 5  | 0.004030903 | '29.5.11. ac195147.3_f<br>-77858 4.5.2' | gt001                 | 'protein.degradation.ubiq<br>uitin.E3.BTB/POZ<br>Cullin3.BTB/POZ' |
| 448 Fuma | 7  | 162478193 | 113.1514273 | 13 | 0.004228173 | '29.5.11. ac195147.3_f<br>-78048 4.5.2' | gt001                 | 'protein.degradation.ubiq<br>uitin.E3.BTB/POZ<br>Cullin3.BTB/POZ' |
| 449 Fuma | 7  | 162482540 | 113.1719093 | 13 | 0.003306758 | '29.5.11. ac195147.3_f<br>-82395 4.5.2' | gt001                 | 'protein.degradation.ubiq<br>uitin.E3.BTB/POZ<br>Cullin3.BTB/POZ' |
| 450 Fuma | 8  | 156139987 | 82.72693349 | 6  | -0.00298176 | -33486 '31.5.1'                         | grmzm2g435<br>034_t01 | 'cell.cell death.plants'                                          |
| 451 Fuma | 8  | 160438189 | 89.3463314  | 64 | 0.003362949 | -118515 '10.5'                          | grmzm2g003<br>493_t01 | 'cell wall.cell wall<br>proteins'                                 |
| 452 Fuma | 8  | 160597062 | 89.61860448 | 5  | 0.004068163 | -17768 '27.3.99'                        | grmzm2g070<br>898_t01 | 'RNA.regulation of<br>transcription.unclassified<br>'             |
| 453 Fuma | 8  | 160929154 | 90.26562868 | 10 | 0.003237693 | -13321 '30.2.11'                        | grmzm2g107<br>484_t01 | 'signalling.receptor<br>kinases.leucine rich<br>repeat XI'        |
| 454 Fuma | 10 | 89924492  | 41.55012521 | 6  | 0.006236087 | -7043 '29.5.5'                          | grmzm2g063<br>592_t01 | 'protein.degradation.seri<br>ne protease'                         |

|          |    |           |             |    |              |                  |                       |                                                                                     |
|----------|----|-----------|-------------|----|--------------|------------------|-----------------------|-------------------------------------------------------------------------------------|
| 455 Fuma | 10 | 148039817 | 99.52795003 | 15 | 0.003588536  | -6298 '11.1.13'  | grmzm2g173<br>636_t01 | 'lipid metabolism.FA<br>synthesis and FA<br>elongation.acyl-CoA<br>binding protein' |
| 456 Fuma | 10 | 148043393 | 99.54799587 | 25 | 0.004260238  | -9874 '11.1.13'  | grmzm2g173<br>636_t01 | 'lipid metabolism.FA<br>synthesis and FA<br>elongation.acyl-CoA<br>binding protein' |
| 457 Gluc | 1  | 19427291  | 35.91876596 | 7  | -0.027454867 | -6397 '26.2'     | grmzm2g039<br>129_t01 | 'misc.UDP glucosyl and<br>glucoronyl transferases'                                  |
| 458 Gluc | 1  | 19427753  | 35.91919409 | 22 | -0.037111842 | -6859 '26.2'     | grmzm2g039<br>129_t01 | 'misc.UDP glucosyl and<br>glucoronyl transferases'                                  |
| 459 Gluc | 1  | 19745377  | 36.21353287 | 15 | -0.032734262 | -20670 '27.3.39' | grmzm2g447<br>551_t02 | 'RNA.regulation of<br>transcription.AtSR<br>Transcription Factor<br>family'         |
| 460 Gluc | 1  | 19745402  | 36.21355604 | 13 | -0.045012011 | -20695 '27.3.39' | grmzm2g447<br>551_t02 | 'RNA.regulation of<br>transcription.AtSR<br>Transcription Factor<br>family'         |
| 461 Gluc | 1  | 45048717  | 61.17102638 | 9  | 0.038550257  | -84899 '11.2.3'  | grmzm2g074<br>401_t01 | 'lipid metabolism.FA<br>desaturation.omega 3<br>desaturase'                         |
| 462 Gluc | 1  | 48047150  | 63.48200445 | 8  | 0.034229401  | -214242 '31.1'   | grmzm2g122<br>965_t01 | 'cell.organisation'                                                                 |

|     |      |   |           |             |    |              |         |                     |                       |                                                                              |
|-----|------|---|-----------|-------------|----|--------------|---------|---------------------|-----------------------|------------------------------------------------------------------------------|
| 463 | Gluc | 1 | 51070607  | 65.47738632 | 7  | 0.029008336  | -257764 | '33.99'             | ac208571.4_f<br>gt001 | 'development.unspecific<br>d'                                                |
| 464 | Gluc | 1 | 56261977  | 69.68972945 | 5  | 0.023260105  | -85357  | '30.2.11'           | grmzm2g119<br>850_t01 | 'signalling.receptor<br>kinases.leucine rich<br>repeat XI'                   |
| 465 | Gluc | 1 | 155941648 | 90.6953495  | 7  | 0.038011307  | -220544 | '27.3.21'           | grmzm2g179<br>325_t01 | 'RNA.regulation of<br>transcription.GRAS<br>transcription factor<br>family'  |
| 466 | Gluc | 1 | 219996077 | 128.8274919 | 14 | 0.047101374  | -76064  | '17.2.3'            | ac217977.3_f<br>gt001 | 'hormone<br>metabolism.auxin.induce<br>d-regulated-responsive-<br>activated' |
| 467 | Gluc | 1 | 222371522 | 129.7775422 | 6  | 0.060501845  | -20027  | '29.5.11.<br>4.3.2' | grmzm2g067<br>626_t01 | 'protein.degradation.ubiq<br>uitin.E3.SCF.FBOX'                              |
| 468 | Gluc | 1 | 239603760 | 141.3379825 | 11 | -0.05994586  | -224044 | '30.3'              | grmzm2g070<br>673_t01 | 'signalling.calcium'<br>'hormone<br>metabolism.auxin.induce                  |
| 469 | Gluc | 2 | 3583432   | 9.929705575 | 9  | -0.023800048 | -7688   | '17.2.3'            | grmzm2g365<br>166_t01 | d-regulated-responsive-<br>activated'<br>'hormone<br>metabolism.auxin.induce |
| 470 | Gluc | 2 | 3583516   | 9.930283959 | 21 | -0.023735882 | -7772   | '17.2.3'            | grmzm2g365<br>166_t01 | d-regulated-responsive-<br>activated'                                        |
| 471 | Gluc | 2 | 3980052   | 10.9932083  | 9  | -0.020514387 | -437    | '34.3'              | grmzm2g042<br>933_t07 | 'transport.amino acids'                                                      |
| 472 | Gluc | 2 | 4089979   | 11.27575825 | 6  | -0.027570085 | -50585  | '30.2.17'           | grmzm2g391<br>741_t01 | 'signalling.receptor<br>kinases.DUF 26'                                      |

|     |      |   |           |             |    |              |                           |                       |                                                                                      |
|-----|------|---|-----------|-------------|----|--------------|---------------------------|-----------------------|--------------------------------------------------------------------------------------|
| 473 | Gluc | 2 | 4154747   | 11.44223414 | 8  | -0.02251602  | -4133 '1.3.13'            | grmzm2g039<br>345_t01 | 'PS.calvin cycle.rubisco<br>interacting'                                             |
| 474 | Gluc | 2 | 5500383   | 16.53049076 | 8  | -0.031577515 | -118826 '30.2.3'          | grmzm2g055<br>844_t01 | 'signalling.receptor<br>kinases.leucine rich<br>repeat III'                          |
| 475 | Gluc | 2 | 21516360  | 52.5167576  | 7  | -0.044827778 | -6069 '34.13'             | grmzm2g051<br>179_t01 | 'transport.peptides and<br>oligopeptides'                                            |
| 476 | Gluc | 2 | 21991139  | 53.30019341 | 33 | -0.044813254 | -152694 '30.5'            | grmzm2g132<br>055_t01 | 'signalling.G-proteins'                                                              |
| 477 | Gluc | 2 | 21995485  | 53.30230537 | 23 | -0.037693821 | -2292 '27.3.9'            | grmzm2g404<br>973_t01 | 'RNA.regulation of<br>transcription.C2C2(Zn)<br>GATA transcription<br>factor family' |
| 478 | Gluc | 2 | 21996541  | 53.30281854 | 21 | -0.033790264 | -3348 '27.3.9'            | grmzm2g404<br>973_t01 | 'RNA.regulation of<br>transcription.C2C2(Zn)<br>GATA transcription<br>factor family' |
| 479 | Gluc | 2 | 61159379  | 74.01441319 | 8  | -0.032013585 | '29.5.11.<br>-391771 4.2' | grmzm2g068<br>590_t02 | 'protein.degradation.ubiq<br>uitin.E3.RING'                                          |
| 480 | Gluc | 2 | 160568992 | 82.32572371 | 9  | -0.041399233 | -100627 '31.3'            | grmzm2g161<br>382_t01 | 'cell.cycle'                                                                         |
| 481 | Gluc | 2 | 175895506 | 86.83396756 | 12 | 0.048831829  | -69368 '11.1.20'          | grmzm2g043<br>501_t01 | 'lipid metabolism.FA<br>synthesis and FA<br>elongation.MCD'                          |
| 482 | Gluc | 2 | 186768867 | 98.0043879  | 8  | -0.035176619 | -1542 '27.3.6'            | grmzm2g417<br>597_t01 | 'RNA.regulation of<br>transcription.bHLH,Basi<br>c Helix-Loop-Helix<br>family'       |



|     |      |   |           |             |    |              |         |           |                       |                                                                              |
|-----|------|---|-----------|-------------|----|--------------|---------|-----------|-----------------------|------------------------------------------------------------------------------|
| 483 | Gluc | 2 | 188188473 | 99.75988308 | 11 | -0.03166046  | -118565 | '17.2.3'  | grmzm2g150<br>319_t01 | 'hormone<br>metabolism.auxin.induce<br>d-regulated-responsive-<br>activated' |
| 484 | Gluc | 3 | 1878568   | 3.303968086 | 7  | -0.028976818 | -32651  | '34.19.2' | grmzm2g093<br>090_t01 | 'transport.Major Intrinsic<br>Proteins.TIP'                                  |
| 485 | Gluc | 3 | 1878573   | 3.303993959 | 5  | -0.031384063 | -32656  | '34.19.2' | grmzm2g093<br>090_t01 | 'transport.Major Intrinsic<br>Proteins.TIP'                                  |
| 486 | Gluc | 3 | 1878755   | 3.304935735 | 5  | -0.021125504 | -32838  | '34.19.2' | grmzm2g093<br>090_t01 | 'transport.Major Intrinsic<br>Proteins.TIP'                                  |
| 487 | Gluc | 3 | 4677417   | 17.51176627 | 6  | -0.021815356 | -4483   | '26.2'    | grmzm2g055<br>313_t01 | 'misc.UDP glucosyl and<br>glucoronyl transferases'                           |
| 488 | Gluc | 3 | 10108659  | 34.7208259  | 23 | -0.027274921 | -34001  | '34.16'   | grmzm2g118<br>243_t01 | 'transport.ABC<br>transporters and<br>multidrug resistance<br>systems'       |
| 489 | Gluc | 3 | 10750452  | 36.00654788 | 19 | -0.029665146 | -119519 | '26.2'    | grmzm2g338<br>465_t01 | 'misc.UDP glucosyl and<br>glucoronyl transferases'                           |
| 490 | Gluc | 3 | 13310374  | 40.12977866 | 10 | -0.029446598 | -9122   | '34.19.2' | grmzm2g146<br>627_t01 | 'transport.Major Intrinsic<br>Proteins.TIP'                                  |

|     |      |   |           |             |    |              |         |           |                       |                                                                        |
|-----|------|---|-----------|-------------|----|--------------|---------|-----------|-----------------------|------------------------------------------------------------------------|
| 491 | Gluc | 3 | 13634107  | 40.54837757 | 8  | -0.028513384 | -8039   | '27.2'    | grmzm2g102<br>664_t01 | 'RNA.transcription'                                                    |
| 492 | Gluc | 3 | 16806728  | 44.65069551 | 9  | -0.029377307 | -33384  | '16.2'    | ac215260.3_f<br>gt003 | 'secondary<br>metabolism.phenylpropa<br>noids'                         |
| 493 | Gluc | 3 | 19194362  | 47.73799582 | 8  | -0.033080281 | -9397   | '29.5.9'  | grmzm2g088<br>834_t01 | 'protein.degradation.AA<br>A type'                                     |
| 494 | Gluc | 3 | 49808116  | 56.5306869  | 16 | -0.031996718 | -108836 | '34.16'   | grmzm2g119<br>894_t01 | 'transport.ABC<br>transporters and<br>multidrug resistance<br>systems' |
| 495 | Gluc | 3 | 67958527  | 58.10223721 | 5  | -0.033220713 | -351421 | '27.3.44' | grmzm2g015<br>277_t01 | 'RNA.regulation of<br>transcription.Chromatin<br>Remodeling Factors'   |
| 496 | Gluc | 3 | 84984528  | 58.15869307 | 19 | -0.053941727 | -1317   | '20.2.99' | grmzm2g343<br>974_t01 | 'stress.abiotic.unspecifie<br>d'                                       |
| 497 | Gluc | 3 | 126612628 | 60.92265927 | 13 | -0.036596401 | -64275  | '20.2.99' | ac209744.3_f<br>gt001 | 'stress.abiotic.unspecifie<br>d'                                       |
| 498 | Gluc | 3 | 135511148 | 62.83074525 | 10 | -0.032809231 | -64544  | '26.2'    | grmzm2g174<br>769_t01 | 'misc.UDP glucosyl and<br>glucuronyl transferases'                     |
| 499 | Gluc | 3 | 213286642 | 125.2764546 | 22 | 0.027989477  | -95400  | '27.3.12' | grmzm2g157<br>927_t01 | 'RNA.regulation of<br>transcription.C3H zinc<br>finger family'         |

|     |      |   |           |             |    |              |         |                     |                       |                                                                               |
|-----|------|---|-----------|-------------|----|--------------|---------|---------------------|-----------------------|-------------------------------------------------------------------------------|
| 500 | Gluc | 3 | 223962036 | 146.2391988 | 22 | 0.049820979  | -94428  | '29.4'              | grmzm2g061<br>681_t02 | 'protein.postranslational<br>modification'                                    |
| 501 | Gluc | 4 | 82547651  | 56.71433525 | 9  | -0.032568459 | -219607 | '33.99'             | grmzm2g146<br>518_t01 | 'development.unspecifie<br>d'                                                 |
| 502 | Gluc | 4 | 93788979  | 57.69805012 | 9  | -0.054449121 | -19907  | '34.13'             | ac184794.2_f<br>gt003 | 'transport.peptides and<br>oligopeptides'                                     |
| 503 | Gluc | 4 | 94875017  | 57.72053661 | 9  | -0.046879342 | -317032 | '30.2.25'           | grmzm2g132<br>591_t01 | 'signalling.receptor<br>kinases.wall associated<br>kinase'                    |
| 504 | Gluc | 4 | 103678485 | 57.89068149 | 10 | -0.02674891  | -12819  | '33.99'             | grmzm2g168<br>365_t02 | 'development.unspecifie<br>d'                                                 |
| 505 | Gluc | 4 | 110571777 | 58.03760973 | 7  | -0.026815621 | -84697  | '1.1.3'             | grmzm2g054<br>687_t01 | 'PS.lightreaction.cytochr<br>ome b6/f'                                        |
| 506 | Gluc | 4 | 142457660 | 60.337891   | 31 | -0.04524174  | -262973 | '23.3.2.1           | grmzm2g135<br>132_t01 | 'nucleotide<br>metabolism.salvage.nucl<br>eoside kinases.adenosine<br>kinase' |
| 507 | Gluc | 4 | 243115508 | 132.4118713 | 10 | -0.035189308 | -13861  | '29.5.11.<br>4.3.2' | grmzm2g166<br>147_t01 | 'protein.degradation.ubiq<br>uitin.E3.SCF.FBOX'                               |

|     |      |   |           |             |    |              |         |                     |                       |                                                                                     |
|-----|------|---|-----------|-------------|----|--------------|---------|---------------------|-----------------------|-------------------------------------------------------------------------------------|
| 508 | Gluc | 4 | 243119871 | 132.428798  | 9  | -0.053005896 | -3567   | '27.3.22'           | grmzm2g166<br>041_t01 | 'RNA.regulation of<br>transcription.HB,Homeo<br>box transcription factor<br>family' |
| 509 | Gluc | 5 | 1571929   | 2.012971503 | 64 | -0.030891034 | -131    | '29.2.1.2<br>.1.21' | grmzm2g125<br>300_t01 | 'protein.synthesis.riboso<br>mal<br>protein.eukaryotic.40S<br>subunit.S21'          |
| 510 | Gluc | 5 | 2357601   | 5.023225032 | 15 | -0.03524917  | -8423   | '27.3.8'            | grmzm2g144<br>188_t01 | 'RNA.regulation of<br>transcription.C2C2(Zn)<br>DOF zinc finger family'             |
| 511 | Gluc | 5 | 2358292   | 5.027739617 | 11 | -0.034233745 | -9114   | '27.3.8'            | grmzm2g144<br>188_t01 | 'RNA.regulation of<br>transcription.C2C2(Zn)<br>DOF zinc finger family'             |
| 512 | Gluc | 5 | 7584397   | 28.79525161 | 9  | 0.05608891   | -15192  | '29.4'              | grmzm2g014<br>618_t01 | 'protein.postranslational<br>modification'                                          |
| 513 | Gluc | 5 | 7815403   | 29.72899837 | 23 | 0.066760523  | -75801  | '29.3.4.2<br>'      | grmzm2g077<br>295_t01 | 'protein.targeting.secreto<br>ry pathway.golgi'                                     |
| 514 | Gluc | 5 | 10372835  | 33.33515135 | 6  | 0.037017755  | -182827 | '31.1'              | grmzm2g152<br>328_t01 | 'cell.organisation'                                                                 |
| 515 | Gluc | 5 | 10642005  | 33.95941932 | 32 | 0.047231589  | -99030  | '31.2'              | grmzm2g131<br>324_t01 | 'cell.division'                                                                     |
| 516 | Gluc | 5 | 11555355  | 36.07769085 | 9  | 0.04595894   | -8454   | '27.3.49'           | grmzm2g162<br>405_t01 | 'RNA.regulation of<br>transcription.GeBP like'                                      |
| 517 | Gluc | 5 | 15080589  | 45.43333631 | 7  | -0.041567563 | -28137  | '27.1'              | grmzm2g420<br>732_t01 | 'RNA.processing'                                                                    |

|     |      |   |           |             |    |              |         |           |                       |                                                                                                       |
|-----|------|---|-----------|-------------|----|--------------|---------|-----------|-----------------------|-------------------------------------------------------------------------------------------------------|
| 518 | Gluc | 5 | 15334088  | 45.78544974 | 26 | -0.0335316   | -4193   | '31.1'    | grmzm2g078<br>612_t01 | 'cell.organisation'                                                                                   |
| 519 | Gluc | 5 | 23315145  | 53.64866829 | 8  | -0.048304577 | -77757  | '28.2'    | grmzm2g060<br>349_t01 | 'DNA.repair'                                                                                          |
| 520 | Gluc | 5 | 36811132  | 58.27317542 | 5  | -0.030458025 | -124287 | '30.3'    | grmzm2g096<br>228_t01 | 'signalling.calcium'                                                                                  |
| 521 | Gluc | 5 | 36811154  | 58.27317812 | 24 | -0.030783704 | -124309 | '30.3'    | grmzm2g096<br>228_t01 | 'signalling.calcium'                                                                                  |
| 522 | Gluc | 5 | 37443804  | 58.32813065 | 7  | -0.027227488 | -196912 | '27.4'    | ac217556.3_f<br>gt003 | 'RNA.RNA binding'                                                                                     |
| 523 | Gluc | 5 | 38114919  | 58.37370611 | 5  | -0.032853631 | -226447 | '11.1.1'  | grmzm2g377<br>341_t01 | 'lipid metabolism.FA<br>synthesis and FA<br>elongation.Acetyl CoA<br>Carboxylation'                   |
| 524 | Gluc | 5 | 88070567  | 69.41851202 | 9  | -0.048661521 | -174293 | '27.1'    | grmzm2g136<br>599_t01 | 'RNA.processing'<br>'RNA.regulation of<br>transcription.MYB<br>domain transcription<br>factor family' |
| 525 | Gluc | 5 | 114204945 | 70.51015923 | 15 | -0.037585673 | -182325 | '27.3.25' | grmzm2g159<br>155_t01 | 'RNA.RNA binding'                                                                                     |
| 526 | Gluc | 5 | 149251475 | 73.13980408 | 9  | -0.039233421 | -768    | '33.99'   | grmzm2g108<br>016_t01 | 'development.unspecifie<br>d'                                                                         |

|     |      |   |           |             |    |              |                   |                       |                                                                                      |
|-----|------|---|-----------|-------------|----|--------------|-------------------|-----------------------|--------------------------------------------------------------------------------------|
| 527 | Gluc | 5 | 163819573 | 76.76334725 | 6  | 0.03892669   | -1683 '28.1'      | grmzm2g011<br>631_t01 | 'DNA.synthesis/chromatin structure'                                                  |
| 528 | Gluc | 5 | 165729383 | 77.90457087 | 6  | -0.068401599 | -437510 '27.3.30' | grmzm2g084<br>684_t01 | 'RNA.regulation of transcription.Trihelix, Triple-Helix transcription factor family' |
| 529 | Gluc | 5 | 167871133 | 79.69575659 | 8  | -0.063461483 | -25140 '26.16'    | grmzm2g038<br>669_t01 | 'misc.myrosinases-lectin-jacalin'                                                    |
| 530 | Gluc | 5 | 168259864 | 79.99109637 | 14 | -0.054728927 | -178993 '15.2'    | grmzm2g113<br>332_t01 | 'metal handling.binding, chelation and storage'                                      |
| 531 | Gluc | 5 | 168260887 | 79.99218626 | 6  | -0.044931698 | -180016 '15.2'    | grmzm2g113<br>332_t01 | 'metal handling.binding, chelation and storage'                                      |
| 532 | Gluc | 5 | 192568110 | 101.6096752 | 10 | 0.062349209  | -3074 '31.1'      | grmzm2g015<br>127_t01 | 'cell.organisation'                                                                  |
| 533 | Gluc | 5 | 200083354 | 107.7054585 | 5  | -0.035928509 | -19886 '20.2.3'   | grmzm2g415<br>062_t01 | 'stress.abiotic.drought/salt'                                                        |
| 534 | Gluc | 5 | 200531277 | 108.3769927 | 13 | 0.049459237  | -115474 '21.2.1'  | grmzm2g320<br>307_t01 | 'redox.ascorbate and glutathione.ascorbate'                                          |
| 535 | Gluc | 5 | 201231896 | 109.0981131 | 11 | -0.04069251  | -25913 '20.2.1'   | grmzm2g020<br>040_t01 | 'stress.abiotic.heat'                                                                |

|     |      |   |           |              |    |              |                              |                       |                                                                              |
|-----|------|---|-----------|--------------|----|--------------|------------------------------|-----------------------|------------------------------------------------------------------------------|
| 536 | Gluc | 5 | 209935600 | 130.9474516  | 5  | 0.054968328  | -9124 '29.5.9'               | grmzm2g403<br>454_t01 | 'protein.degradation.AA<br>A type'                                           |
| 537 | Gluc | 5 | 212261524 | 139.7573696  | 29 | 0.03161962   | -20262 '27.1.1'              | grmzm2g080<br>930_t01 | 'RNA.processing.splicin<br>g'                                                |
| 538 | Gluc | 5 | 213298320 | 144.5886587  | 7  | 0.03745947   | -2778 '29.4'                 | grmzm2g180<br>430_t01 | 'protein.postranslational<br>modification'                                   |
| 539 | Gluc | 6 | 1331502   | -9.338084147 | 17 | 0.048982117  | -43973 '26.12'               | grmzm2g098<br>174_t01 | 'misc.peroxidases'                                                           |
| 540 | Gluc | 6 | 1335665   | -9.333360919 | 20 | 0.044914068  | '29.5.11.<br>-31 4.2'        | grmzm2g423<br>956_t01 | 'protein.degradation.ubiq<br>uitin.E3.RING'                                  |
| 541 | Gluc | 6 | 9189279   | -0.422862181 | 10 | 0.0457043    | -5373 '31.1'                 | grmzm2g066<br>400_t01 | 'cell.organisation'                                                          |
| 542 | Gluc | 6 | 49947554  | 8.548807235  | 13 | 0.050794602  | -852925 '27.3.49'            | grmzm2g392<br>516_t01 | 'RNA.regulation of<br>transcription.GeBP like'                               |
| 543 | Gluc | 6 | 122728773 | 45.27892524  | 28 | -0.090243045 | -4430 '33.99'                | grmzm2g071<br>162_t01 | 'development.unspecifie<br>d'                                                |
| 544 | Gluc | 6 | 123562319 | 45.55520364  | 14 | -0.085892259 | '29.2.1.2<br>-108986 .2.523' | grmzm2g166<br>659_t01 | 'protein.synthesis.riboso<br>mal<br>protein.eukaryotic.60S<br>subunit.L23A'  |
| 545 | Gluc | 6 | 157445216 | 76.89711855  | 5  | -0.059505241 | -133994 '11.8.1'             | grmzm2g163<br>008_t01 | 'lipid<br>metabolism."exotics"<br>(steroids, squalene<br>etc).sphingolipids' |

|     |      |   |           |             |    |              |                        |                       |                                                       |
|-----|------|---|-----------|-------------|----|--------------|------------------------|-----------------------|-------------------------------------------------------|
| 546 | Gluc | 6 | 157953572 | 77.68801846 | 6  | -0.050730304 | '29.3.4.1<br>-332      | grmzm2g060<br>324_t01 | 'protein.targeting.secreto<br>ry pathway.ER'          |
| 547 | Gluc | 7 | 3665692   | 13.3545418  | 11 | -0.043550162 | -175257 '20.1'         | grmzm2g465<br>226_t01 | 'stress.biotic'                                       |
| 548 | Gluc | 7 | 20233795  | 44.69829015 | 5  | -0.032821318 | '29.3.4.9<br>-72625 9' | grmzm2g105<br>996_t01 | 'protein.targeting.secreto<br>ry pathway.unspecified' |
| 549 | Gluc | 7 | 27327128  | 46.7793044  | 15 | -0.031600786 | -665835 '23.2'         | grmzm2g173<br>063_t01 | 'nucleotide<br>metabolism.degradation'                |
| 550 | Gluc | 7 | 32868948  | 47.79855164 | 40 | -0.03385516  | -233353 '31.3.1'       | grmzm2g092<br>072_t01 | 'cell.cycle.peptidylprolyl<br>isomerase'              |
| 551 | Gluc | 7 | 84574592  | 49.92029539 | 16 | -0.03318546  | -67361 '30.2.99'       | grmzm2g354<br>615_t01 | 'signalling.receptor<br>kinases.misc'                 |
| 552 | Gluc | 7 | 151684587 | 89.72788592 | 23 | 0.050943726  | -59671 '29.3'          | grmzm2g033<br>493_t01 | 'protein.targeting'                                   |
| 553 | Gluc | 7 | 151704874 | 89.76604438 | 13 | 0.063838907  | -79958 '29.3'          | grmzm2g033<br>493_t01 | 'protein.targeting'                                   |



|     |      |   |           |             |    |              |         |                   |                       |                                                                                               |
|-----|------|---|-----------|-------------|----|--------------|---------|-------------------|-----------------------|-----------------------------------------------------------------------------------------------|
| 554 | Gluc | 7 | 159106172 | 104.5548504 | 6  | -0.033343837 | -94883  | '27.3.15'         | grmzm2g384<br>528_t01 | 'RNA.regulation of<br>transcription.CCAAT<br>box binding factor<br>family, HAP3'              |
| 555 | Gluc | 7 | 166657242 | 123.8438631 | 13 | 0.046507086  | -105055 | '34.15'           | grmzm2g020<br>766_t01 | 'transport.potassium'                                                                         |
| 556 | Gluc | 7 | 167223656 | 126.3055595 | 5  | 0.04371809   | -3846   | '29.4'            | grmzm2g166<br>658_t01 | 'protein.postranslational<br>modification'                                                    |
| 557 | Gluc | 7 | 168146720 | 130.3172954 | 14 | 0.038042497  | -9079   | '29.3.1'          | ac155434.2_f<br>gt004 | 'protein.targeting.nucleus<br>'                                                               |
| 558 | Gluc | 7 | 168146779 | 130.3175518 | 16 | 0.050979889  | -9138   | '29.3.1'          | ac155434.2_f<br>gt004 | 'protein.targeting.nucleus<br>'                                                               |
| 559 | Gluc | 7 | 168259468 | 130.8073104 | 11 | 0.027577674  | -67178  | '27.3.19'         | grmzm2g151<br>811_t01 | 'RNA.regulation of<br>transcription.EIN3-<br>like(EIL) transcription<br>factor family'        |
| 560 | Gluc | 7 | 168322280 | 131.0802981 | 6  | 0.034001816  | -59905  | '29.5.1'          | grmzm2g059<br>165_t01 | 'protein.degradation.subt<br>ilases'                                                          |
| 561 | Gluc | 7 | 169418608 | 134.40687   | 6  | 0.032947988  | -1317   | '29.5.11.<br>4.2' | grmzm2g440<br>866_t01 | 'protein.degradation.ubiq<br>uitin.E3.RING'                                                   |
| 562 | Gluc | 7 | 169612994 | 134.5554328 | 6  | -0.060679509 | -2569   | '26.19'           | grmzm2g086<br>628_t01 | 'misc.plastocyanin-like'                                                                      |
| 563 | Gluc | 7 | 170074937 | 134.9084806 | 8  | 0.04615997   | -28013  | '13.1.6.1<br>.2'  | grmzm2g051<br>129_t01 | 'amino acid<br>metabolism.synthesis.aro<br>matic aa.chorismate.3-<br>dehydroquinase synthase' |

|     |      |   |           |             |    |              |        |                   |                       |                                                                                                  |
|-----|------|---|-----------|-------------|----|--------------|--------|-------------------|-----------------------|--------------------------------------------------------------------------------------------------|
| 564 | Gluc | 8 | 10208359  | 26.24898642 | 5  | -0.026684796 | -6556  | '29.1.7'          | grmzm2g140<br>754_t01 | 'protein.aa<br>activation.alanine-tRNA<br>ligase'                                                |
| 565 | Gluc | 8 | 10978629  | 28.40458338 | 9  | -0.025432862 | -4989  | '33.99'           | grmzm2g049<br>661_t01 | 'development.unspecifie<br>d'                                                                    |
| 566 | Gluc | 8 | 13271527  | 33.98105    | 6  | -0.027208471 | -3957  | '30.2.20'         | grmzm2g171<br>807_t01 | 'signalling.receptor<br>kinases.wheat LRK10<br>like'                                             |
| 567 | Gluc | 8 | 15541604  | 37.97326272 | 22 | -0.033735477 | -23356 | '29.5.11.<br>4.2' | grmzm2g305<br>901_t01 | 'protein.degradation.ubiq<br>uitin.E3.RING'                                                      |
| 568 | Gluc | 8 | 17101531  | 39.8048484  | 7  | -0.028932686 | -58729 | '27.3.30'         | grmzm2g025<br>215_t01 | 'RNA.regulation of<br>transcription.Trihelix,<br>Triple-Helix<br>transcription factor<br>family' |
| 569 | Gluc | 8 | 17783857  | 40.90236227 | 24 | -0.035698197 | -69101 | '27.1'            | grmzm2g047<br>949_t01 | 'RNA.processing'                                                                                 |
| 570 | Gluc | 8 | 141607731 | 72.49035639 | 5  | 0.035922564  | -18434 | '26.28'           | grmzm2g117<br>754_t01 | 'misc.GDSL-motif lipase'                                                                         |
| 571 | Gluc | 8 | 160611990 | 89.64768912 | 7  | 0.033050154  | -32696 | '27.3.99'         | grmzm2g070<br>898_t01 | 'RNA.regulation of<br>transcription.unclassified<br>'                                            |
| 572 | Gluc | 8 | 161247986 | 90.88681804 | 17 | 0.025027089  | -5246  | '31.3.1'          | grmzm2g031<br>204_t01 | 'cell.cycle.peptidylprolyl<br>isomerase'                                                         |

|     |      |   |           |              |    |              |                         |                       |                                                                                                 |
|-----|------|---|-----------|--------------|----|--------------|-------------------------|-----------------------|-------------------------------------------------------------------------------------------------|
| 573 | Gluc | 8 | 161456583 | 91.29323346  | 6  | 0.027119377  | -82611 '33.99'          | grmzm2g096<br>169_t01 | 'development.unspecifie<br>d'                                                                   |
| 574 | Gluc | 8 | 162617259 | 92.65142696  | 6  | 0.024273535  | -16908 '28.2'           | grmzm2g700<br>757_t01 | 'DNA.repair'                                                                                    |
| 575 | Gluc | 8 | 173914014 | 136.3104872  | 19 | 0.020511215  | -35877 '30.3'           | ac203173.3_f<br>gt001 | 'signalling.calcium'                                                                            |
| 576 | Gluc | 9 | 2701441   | -3.388186607 | 6  | -0.065619148 | -280728 '27.1.19'       | grmzm2g016<br>275_t01 | 'RNA.processing.ribonuc<br>leases'                                                              |
| 577 | Gluc | 9 | 6998866   | 8.219401947  | 9  | -0.027000187 | -205260 '20.2.1'        | grmzm2g097<br>620_t01 | 'stress.abiotic.heat'                                                                           |
| 578 | Gluc | 9 | 7182819   | 8.716269429  | 28 | -0.045797986 | -40774 '31.1'           | grmzm2g017<br>257_t01 | 'cell.organisation'                                                                             |
| 579 | Gluc | 9 | 10186494  | 15.44407336  | 6  | -0.034472041 | '29.4.1.5<br>-142075 7' | grmzm2g055<br>982_t01 | 'protein.postranslational<br>modification.kinase.rece<br>ptor like cytoplasmatic<br>kinase VII' |
| 580 | Gluc | 9 | 26517167  | 43.30986818  | 6  | 0.044089609  | -2690 '27.3.25'         | grmzm2g044<br>824_t01 | 'RNA.regulation of<br>transcription.MYB<br>domain transcription<br>factor family'               |
| 581 | Gluc | 9 | 26517266  | 43.30992673  | 33 | 0.044430659  | -2789 '27.3.25'         | grmzm2g044<br>824_t01 | 'RNA.regulation of<br>transcription.MYB<br>domain transcription<br>factor family'               |

|     |      |    |           |             |    |              |         |                                     |                                                                                                                               |
|-----|------|----|-----------|-------------|----|--------------|---------|-------------------------------------|-------------------------------------------------------------------------------------------------------------------------------|
| 582 | Gluc | 9  | 60088439  | 45.65313865 | 30 | 0.055300858  | -297869 | '13.1.6.4 grmzm2g324<br>.1' 297_t01 | 'amino acid<br>metabolism.synthesis.aro<br>matic<br>aa.tyrosine.arogenate<br>dehydrogenase \&<br>prephenate<br>dehydrogenase' |
| 583 | Gluc | 9  | 144805016 | 93.75044572 | 11 | 0.03694982   | -2034   | '3.4.3' grmzm2g004<br>528_t01       | 'minor CHO<br>metabolism.myo-<br>inositol.InsP Synthases'                                                                     |
| 584 | Gluc | 10 | 5427445   | 17.07840286 | 48 | -0.069028108 | -60     | '27.1.19' grmzm2g065<br>804_t01     | 'RNA.processing.ribonuc<br>leases'                                                                                            |
| 585 | Gluc | 10 | 37230981  | 36.08777546 | 15 | 0.057220632  | -4181   | '26.27' grmzm2g459<br>370_t01       | 'misc.calcineurin-like<br>phosphoesterase family<br>protein'                                                                  |
| 586 | Gluc | 10 | 52110744  | 36.32411544 | 18 | 0.071276311  | -52762  | '28.1' grmzm2g074<br>818_t01        | 'DNA.synthesis/chromati<br>n structure'                                                                                       |
| 587 | Gluc | 10 | 76226092  | 38.27843109 | 8  | 0.042662267  | -174913 | '34.3' grmzm2g078<br>292_t01        | 'transport.amino acids'                                                                                                       |
| 588 | Gluc | 10 | 76332289  | 38.30539729 | 11 | 0.043798998  | -5213   | '27.3.67' grmzm2g145<br>130_t01     | 'RNA.regulation of<br>transcription.putative<br>transcription regulator'                                                      |
| 589 | Gluc | 10 | 85540940  | 40.43084945 | 33 | 0.066852209  | -54606  | '29.4' grmzm2g060<br>798_t01        | 'protein.postranslational<br>modification'                                                                                    |
| 590 | Gluc | 10 | 138301683 | 66.29092836 | 9  | -0.037590118 | -163884 | '3.5' af466202.2_f<br>gt007         | 'minor CHO<br>metabolism.others'                                                                                              |

|     |      |    |           |             |    |              |         |           |                       |                                                                                        |
|-----|------|----|-----------|-------------|----|--------------|---------|-----------|-----------------------|----------------------------------------------------------------------------------------|
| 591 | Gluc | 10 | 144247405 | 82.22431479 | 8  | -0.040531525 | -2506   | '10.6.2'  | grmzm2g136<br>895_t01 | 'cell<br>wall.degradation.mannan-<br>xylose-arabinose-fucose'                          |
| 592 | Gluc | 10 | 148193563 | 100.3897975 | 8  | -0.046829239 | -415    | '28.2'    | grmzm2g093<br>623_t01 | 'DNA.repair'                                                                           |
| 593 | Glut | 1  | 52690146  | 67.43745454 | 13 | -0.00764858  | -34797  | '27.3.19' | grmzm2g033<br>570_t01 | 'RNA.regulation of<br>transcription.EIN3-<br>like(EIL) transcription<br>factor family' |
| 594 | Glut | 1  | 182943941 | 98.00929506 | 43 | 0.004651268  | -192837 | '27.4'    | grmzm2g107<br>163_t01 | 'RNA.RNA binding'                                                                      |
| 595 | Glut | 1  | 182944297 | 98.00949265 | 10 | 0.004698343  | -193193 | '27.4'    | grmzm2g107<br>163_t01 | 'RNA.RNA binding'                                                                      |
| 596 | Glut | 1  | 183661710 | 98.46017249 | 25 | 0.005469687  | -4262   | '34.99'   | grmzm2g113<br>840_t02 | 'transport.misc'                                                                       |
| 597 | Glut | 1  | 219467828 | 128.6162207 | 53 | -0.006511624 | -13460  | '30.2.11' | grmzm2g136<br>353_t01 | 'signalling.receptor<br>kinases.leucine rich<br>repeat XI'                             |
| 598 | Glut | 1  | 220903481 | 129.1904047 | 5  | -0.011601406 | -17822  | '1.5.1'   | grmzm2g174<br>107_t02 | 'PS.carbon concentrating<br>mechanism.C4'                                              |
| 599 | Glut | 1  | 221341695 | 129.3656668 | 12 | -0.009264172 | -119609 | '10.2.1'  | grmzm2g044<br>269_t01 | 'cell wall.cellulose<br>synthesis.cellulose<br>synthase'                               |

|     |      |   |           |             |    |              |         |                     |                       |                                                                                                         |
|-----|------|---|-----------|-------------|----|--------------|---------|---------------------|-----------------------|---------------------------------------------------------------------------------------------------------|
| 600 | Glut | 1 | 277632495 | 170.2619536 | 14 | 0.010539017  | -18814  | '27.3.32'           | grmzm2g008<br>029_t01 | 'RNA.regulation of transcription.WRKY domain transcription factor family'                               |
| 601 | Glut | 2 | 4153357   | 11.43866137 | 14 | 0.008070873  | -2743   | '1.3.13'            | grmzm2g039<br>345_t01 | 'PS.calvin cycle.rubisco interacting'                                                                   |
| 602 | Glut | 2 | 4153720   | 11.4395944  | 56 | 0.009484778  | -3106   | '1.3.13'            | grmzm2g039<br>345_t01 | 'PS.calvin cycle.rubisco interacting'                                                                   |
| 603 | Glut | 2 | 4299868   | 11.96628803 | 12 | 0.003568927  | -25012  | '17.5.2'            | grmzm2g067<br>463_t01 | 'hormone metabolism.ethylene.signal transduction'                                                       |
| 604 | Glut | 2 | 12590485  | 36.29106182 | 5  | -0.008475169 | -9562   | '29.2.1.2<br>.2.12' | grmzm2g149<br>649_t01 | 'protein.synthesis.ribosomal protein.eukaryotic.60S subunit.L12'                                        |
| 605 | Glut | 2 | 133606697 | 78.41212615 | 8  | -0.005723744 | -1115   | '26.8'              | grmzm2g053<br>466_t08 | 'misc.nitrilases, *nitrile lyases, berberine bridge enzymes, reticuline oxidases, troponine reductases' |
| 606 | Glut | 2 | 185662626 | 96.4222994  | 8  | 0.005714311  | -157937 | '29.5.11'           | grmzm2g137<br>558_t01 | 'protein.degradation.ubiquitin'                                                                         |
| 607 | Glut | 2 | 186287170 | 97.21489693 | 11 | 0.00486937   | -10581  | '27.3.16'           | grmzm2g022<br>162_t01 | 'RNA.regulation of transcription.CCAAT box binding factor family, HAP5'                                 |
| 608 | Glut | 2 | 186556918 | 97.58848824 | 7  | 0.00560792   | -12820  | '29.5.11.<br>4.1'   | grmzm2g080<br>439_t01 | 'protein.degradation.ubiquitin.E3.HECT'                                                                 |

|     |      |   |           |             |    |              |         |                              |                       |                                                                                    |
|-----|------|---|-----------|-------------|----|--------------|---------|------------------------------|-----------------------|------------------------------------------------------------------------------------|
| 609 | Glut | 2 | 186556997 | 97.58864326 | 38 | 0.004943913  | -12899  | '29.5.11. grmzm2g080<br>4.1' | 439_t01               | 'protein.degradation.ubiq<br>uitin.E3.HECT'                                        |
| 610 | Glut | 2 | 186558389 | 97.59137473 | 6  | 0.004850272  | -14291  | '29.5.11. grmzm2g080<br>4.1' | 439_t01               | 'protein.degradation.ubiq<br>uitin.E3.HECT'                                        |
| 611 | Glut | 2 | 186558494 | 97.59158077 | 8  | 0.005489912  | -14396  | '29.5.11. grmzm2g080<br>4.1' | 439_t01               | 'protein.degradation.ubiq<br>uitin.E3.HECT'                                        |
| 612 | Glut | 2 | 209437807 | 120.3370062 | 6  | -0.006286015 | -70011  | '27.2'                       | grmzm2g086<br>805_t01 | 'RNA.transcription'                                                                |
| 613 | Glut | 2 | 210076624 | 121.1447377 | 5  | -0.007333198 | -36361  | '26.12'                      | grmzm2g156<br>257_t01 | 'misc.peroxidases'<br>'RNA.regulation of<br>transcription.G2-like                  |
| 614 | Glut | 2 | 233601849 | 155.7785003 | 5  | -0.004272848 | -56209  | '27.3.20'                    | grmzm2g173<br>882_t01 | transcription factor<br>family, GARP'                                              |
| 615 | Glut | 3 | 201451737 | 108.647491  | 5  | -0.009148834 | -156630 | '27.3.32'                    | grmzm2g101<br>405_t01 | 'RNA.regulation of<br>transcription.WRKY<br>domain transcription<br>factor family' |
| 616 | Glut | 3 | 209190519 | 119.5728622 | 8  | -0.008009729 | -34715  | '29.2.1.2<br>.2.518'         | ac230013.2_f<br>gt007 | 'protein.synthesis.riboso<br>mal<br>protein.eukaryotic.60S<br>subunit.L18A'        |
| 617 | Glut | 3 | 210306116 | 120.8801933 | 6  | -0.016920822 | -5739   | '28.99'                      | grmzm2g173<br>989_t03 | 'DNA.unspecified'<br>'lipid<br>metabolism."exotics"                                |
| 618 | Glut | 3 | 210710907 | 121.3852837 | 8  | -0.017895411 | -1120   | '11.8.1'                     | grmzm2g003<br>526_t01 | (steroids, squalene<br>etc).sphingolipids'                                         |

|     |      |   |           |             |    |              |         |             |                       |                                                                                                           |
|-----|------|---|-----------|-------------|----|--------------|---------|-------------|-----------------------|-----------------------------------------------------------------------------------------------------------|
| 619 | Glut | 3 | 210877159 | 121.5927298 | 12 | -0.004934249 | -167372 | '11.8.1'    | grmzm2g003<br>526_t01 | 'lipid metabolism."exotics" (steroids, squalene etc).sphingolipids'                                       |
| 620 | Glut | 3 | 210988072 | 121.7311249 | 6  | -0.016726602 | -19176  | '27.3.3'    | grmzm2g160<br>971_t01 | 'RNA.regulation of transcription.AP2/EREB P, APETALA2/Ethylene-responsive element binding protein family' |
| 621 | Glut | 3 | 211148597 | 121.9314249 | 16 | -0.005852378 | -7703   | '29.4'      | grmzm2g118<br>403_t01 | 'protein.postranslational modification'                                                                   |
| 622 | Glut | 3 | 212234516 | 123.2864138 | 7  | -0.005205315 | -174659 | '13.1.4.1'  | grmzm2g004<br>382_t01 | 'amino acid metabolism.synthesis.branched chain group.common'                                             |
| 623 | Glut | 3 | 212718903 | 123.8908226 | 5  | -0.004685377 | -62927  | '11.9.2.1'  | grmzm2g153<br>672_t01 | 'lipid metabolism.lipid degradation.lipases.triacylglycerol lipase'                                       |
| 624 | Glut | 3 | 213151216 | 124.9438117 | 7  | -0.004725778 | -206324 | '34.8'      | grmzm2g064<br>473_t01 | 'transport.metabolite transporters at the envelope membrane'                                              |
| 625 | Glut | 3 | 213151324 | 124.944077  | 8  | -0.004513687 | -206432 | '34.8'      | grmzm2g064<br>473_t01 | 'transport.metabolite transporters at the envelope membrane'                                              |
| 626 | Glut | 3 | 213890769 | 126.7603538 | 6  | -0.010464009 | -30811  | '1.5.1'     | grmzm2g348<br>512_t02 | 'PS.carbon concentrating mechanism.C4'                                                                    |
| 627 | Glut | 3 | 215225785 | 128.93347   | 9  | -0.005251452 | -5347   | '29.5.11.5' | grmzm2g064<br>283_t01 | 'protein.degradation.ubiquitin.ubiquitin protease'                                                        |



|     |      |   |           |             |    |              |         |           |                       |                                                       |
|-----|------|---|-----------|-------------|----|--------------|---------|-----------|-----------------------|-------------------------------------------------------|
| 628 | Glut | 3 | 225244456 | 148.4971299 | 11 | 0.010839249  | -51223  | '20.2.4'  | grmzm2g071<br>154_t01 | 'stress.abiotic.touch/wounding'                       |
| 629 | Glut | 3 | 228108627 | 153.4517969 | 9  | -0.007734346 | -13056  | '27.1'    | grmzm2g015<br>592_t01 | 'RNA.processing'                                      |
| 630 | Glut | 4 | 113973202 | 58.11061842 | 7  | 0.012195634  | -130029 | '23.2'    | grmzm2g106<br>618_t01 | 'nucleotide<br>metabolism.degradation'                |
| 631 | Glut | 4 | 114035361 | 58.11195261 | 27 | 0.009580393  | -60128  | '29.4'    | grmzm2g130<br>018_t01 | 'protein.postranslational<br>modification'            |
| 632 | Glut | 4 | 114684938 | 58.12589523 | 19 | 0.012290204  | -442195 | '27.3.99' | grmzm2g140<br>016_t01 | 'RNA.regulation of<br>transcription.unclassified<br>' |
| 633 | Glut | 4 | 114784127 | 58.12802424 | 11 | 0.008190782  | -541384 | '27.3.99' | grmzm2g140<br>016_t01 | 'RNA.regulation of<br>transcription.unclassified<br>' |
| 634 | Glut | 4 | 177057914 | 88.36703104 | 8  | -0.004129286 | -311901 | '12.1.1'  | grmzm2g428<br>027_t01 | 'N-metabolism.nitrate<br>metabolism.NR'               |
| 635 | Glut | 4 | 177728199 | 89.41877612 | 7  | -0.004671784 | -43695  | '10.3'    | grmzm2g471<br>594_t01 | 'cell wall.hemicellulose<br>synthesis'                |

|     |      |   |           |             |    |              |         |            |         |            |                                                           |
|-----|------|---|-----------|-------------|----|--------------|---------|------------|---------|------------|-----------------------------------------------------------|
| 636 | Glut | 4 | 180521118 | 93.50092348 | 6  | -0.003964857 | -3260   | '1.1.4.7'  | 171_t01 | grmzm2g025 | 'PS.lightreaction.ATP synthase.delta chain'               |
| 637 | Glut | 4 | 180521269 | 93.50113855 | 12 | -0.003984467 | -3411   | '1.1.4.7'  | 171_t01 | grmzm2g025 | 'PS.lightreaction.ATP synthase.delta chain'               |
| 638 | Glut | 5 | 2188871   | 3.920842986 | 34 | 0.004382943  | -1275   | '34.2'     | 301_t01 | grmzm2g085 | 'transport.sugars'                                        |
| 639 | Glut | 5 | 2188935   | 3.921261124 | 7  | 0.004596176  | -1339   | '34.2'     | 301_t01 | grmzm2g085 | 'transport.sugars'                                        |
| 640 | Glut | 5 | 22628584  | 52.93088442 | 10 | 0.004845342  | -7471   | '27.3.99'  | 379_t01 | grmzm2g078 | 'RNA.regulation of transcription.unclassified'            |
| 641 | Glut | 5 | 24406989  | 53.96237944 | 33 | 0.005600127  | -100832 | '21.1'     | 736_t01 | grmzm2g090 | 'redox.thioredoxin'                                       |
| 642 | Glut | 5 | 26831469  | 54.87846643 | 28 | 0.004300894  | -581639 | '26.10'    | 082_t01 | grmzm2g013 | 'misc.cytochrome P450'                                    |
| 643 | Glut | 5 | 26968073  | 54.93008209 | 8  | 0.004561445  | -1779   | '13.2.6.2' | 145_t01 | grmzm2g174 | 'amino acid metabolism.degradation. aromatic aa.tyrosine' |

|     |      |   |           |              |    |              |         |                     |                       |                                                                                                          |
|-----|------|---|-----------|--------------|----|--------------|---------|---------------------|-----------------------|----------------------------------------------------------------------------------------------------------|
| 644 | Glut | 5 | 204624078 | 116.4807852  | 18 | -0.008453086 | -23326  | '8.1.1.1'           | grmzm2g140<br>150_t01 | 'TCA / org.<br>transformation.TCA.pyruvate DH.E1'                                                        |
| 645 | Glut | 5 | 207099285 | 124.0780936  | 14 | -0.005034335 | -4736   | '27.3.3'            | grmzm2g055<br>204_t01 | 'RNA.regulation of transcription.AP2/EREBP, APETALA2/Ethylene-responsive element binding protein family' |
| 646 | Glut | 5 | 207830710 | 126.0436057  | 6  | -0.005515777 | -70804  | '27.4'              | grmzm2g303<br>915_t02 | 'RNA.RNA binding'                                                                                        |
| 647 | Glut | 5 | 208181590 | 126.6094235  | 22 | -0.00481065  | -25917  | '33.99'             | grmzm2g161<br>175_t01 | 'development.unspecific<br>'lipid metabolism.Phospholipid synthesis.diacylglycerol kinase'               |
| 648 | Glut | 5 | 211971359 | 138.4052511  | 12 | -0.004321074 | -6038   | '11.3.5'            | grmzm2g128<br>214_t01 | 'amino acid metabolism.misc'                                                                             |
| 649 | Glut | 6 | 5873783   | -4.184534568 | 5  | -0.004487679 | -224946 | '13.99'             | grmzm2g034<br>404_t01 | 'protein.synthesis.ribosomal<br>protein.eukaryotic.40S subunit.S29'                                      |
| 650 | Glut | 6 | 12079085  | 2.855833808  | 5  | -0.006531182 | -413099 | '29.2.1.2<br>'1.29' | grmzm2g060<br>373_t03 | 'protein.degradation.ubiquitin.E3.RING'                                                                  |
| 651 | Glut | 6 | 17417589  | 5.992091218  | 17 | -0.007355935 | -148645 | '29.5.11.<br>4.2'   | grmzm2g101<br>662_t01 | 'misc.cytochrome P450'                                                                                   |
| 652 | Glut | 7 | 46996523  | 49.11264731  | 7  | 0.008798227  | -19190  | '26.10'             | grmzm2g435<br>661_t01 | 'DNA.unspecified'                                                                                        |
| 653 | Glut | 7 | 94886697  | 50.37959201  | 10 | 0.005639153  | -41046  | '28.99'             | grmzm2g436<br>649_t01 |                                                                                                          |

|     |      |   |           |             |    |             |                        |                       |                                                                                                                     |
|-----|------|---|-----------|-------------|----|-------------|------------------------|-----------------------|---------------------------------------------------------------------------------------------------------------------|
| 654 | Glut | 7 | 142900670 | 81.10277074 | 5  | 0.006182641 | -9191 '26.8'           | grmzm2g111<br>309_t01 | 'misc.nitrilases, *nitrile<br>lyases, berberine bridge<br>enzymes, reticuline<br>oxidases, troponine<br>reductases' |
| 655 | Glut | 7 | 153318373 | 92.800926   | 8  | 0.005690411 | -48233 '27.3.99'       | grmzm2g081<br>782_t01 | 'RNA.regulation of<br>transcription.unclassified<br>'                                                               |
| 656 | Glut | 8 | 6455489   | 18.09391822 | 6  | 0.00847514  | '13.1.5.3<br>-7403 .1' | grmzm2g082<br>185_t01 | 'amino acid<br>metabolism.synthesis.ser<br>ine-glycine-cysteine<br>group.cysteine.OASTL'                            |
| 657 | Glut | 8 | 6456227   | 18.0946642  | 11 | 0.008664988 | '13.1.5.3<br>-8141 .1' | grmzm2g082<br>185_t01 | 'amino acid<br>metabolism.synthesis.ser<br>ine-glycine-cysteine<br>group.cysteine.OASTL'                            |
| 658 | Glut | 8 | 7548635   | 19.78341505 | 71 | 0.007377193 | -74534 '3.5'           | grmzm2g051<br>842_t01 | 'minor CHO<br>metabolism.others'                                                                                    |
| 659 | Glut | 8 | 101278421 | 58.12094124 | 7  | 0.004952541 | -232812 '27.4'         | grmzm2g111<br>596_t01 | 'RNA.RNA binding'                                                                                                   |
| 660 | Glut | 8 | 103054530 | 58.74182186 | 12 | 0.007297413 | -11798 '27.3.37'       | grmzm2g096<br>064_t01 | 'RNA.regulation of<br>transcription.AS2,Lateral<br>Organ Boundaries Gene<br>Family'                                 |
| 661 | Glut | 8 | 108849125 | 60.58213104 | 58 | 0.007826556 | -37583 '30.5'          | grmzm2g150<br>724_t01 | 'signalling.G-proteins'                                                                                             |
| 662 | Glut | 8 | 111162784 | 61.25050555 | 6  | 0.005962952 | -209 '33.99'           | grmzm2g179<br>679_t01 | 'development.unspecifie<br>d'                                                                                       |

|     |      |    |           |             |    |              |         |          |                       |                                                                           |
|-----|------|----|-----------|-------------|----|--------------|---------|----------|-----------------------|---------------------------------------------------------------------------|
| 663 | Glut | 9  | 147914070 | 105.0171122 | 7  | -0.005016694 | -4364   | '10.3'   | grmzm2g137<br>779_t01 | 'cell wall.hemicellulose<br>synthesis'                                    |
| 664 | Glut | 10 | 4806482   | 13.07619208 | 13 | 0.004785432  | -55832  | '26.13'  | grmzm2g434<br>170_t01 | 'misc.acid and other<br>phosphatases'                                     |
| 665 | Glut | 10 | 4916937   | 13.82732142 | 5  | 0.005675285  | -166287 | '26.13'  | grmzm2g434<br>170_t01 | 'misc.acid and other<br>phosphatases'                                     |
| 666 | Glut | 10 | 107945494 | 44.01972245 | 13 | -0.005346414 | -215929 | '20.1'   | grmzm2g090<br>441_t01 | 'stress.biotic'                                                           |
| 667 | Glut | 10 | 121191348 | 47.87413076 | 6  | -0.00534999  | -81981  | '20.2.1' | grmzm2g135<br>608_t01 | 'stress.abiotic.heat'                                                     |
| 668 | Glut | 10 | 143716606 | 81.33488617 | 5  | 0.005311941  | -1695   | '31.3'   | grmzm2g000<br>650_t01 | 'cell.cycle'                                                              |
| 669 | Glut | 10 | 143720983 | 81.33864061 | 5  | 0.006129575  | -6072   | '31.3'   | grmzm2g000<br>650_t01 | 'cell.cycle'                                                              |
| 670 | Glut | 10 | 145459551 | 86.83094884 | 6  | 0.00654061   | -49     | '18.3.2' | grmzm2g143<br>480_t01 | 'Co-factor and vitamine<br>metabolism.riboflavin.ri<br>boflavin synthase' |

|     |      |    |           |             |    |              |        |          |                       |                                                                                                                     |
|-----|------|----|-----------|-------------|----|--------------|--------|----------|-----------------------|---------------------------------------------------------------------------------------------------------------------|
| 671 | Glut | 10 | 145674099 | 87.6872826  | 53 | 0.005786004  | -3191  | '30.11'  | grmzm2g104<br>268_t01 | 'signalling.light'                                                                                                  |
| 672 | Glut | 10 | 146203278 | 89.79941527 | 6  | 0.005650134  | -2514  | '26.2'   | grmzm2g067<br>424_t01 | 'misc.UDP glucosyl and<br>glucoronyl transferases'                                                                  |
| 673 | Glut | 10 | 146744765 | 92.26833185 | 7  | 0.004535231  | -3993  | '31.1'   | grmzm2g423<br>861_t01 | 'cell.organisation'                                                                                                 |
| 674 | Glut | 10 | 148374079 | 101.4017084 | 12 | 0.006234528  | -2242  | '30.4.3' | grmzm2g406<br>074_t01 | 'signalling.phosphoinosi-<br>des.bis(5"-nucleosyl)-<br>tetraphosphatase'                                            |
| 675 | Mala | 1  | 15026222  | 30.17736702 | 5  | -0.00767141  | -640   | '34.2.1' | grmzm2g034<br>302_t01 | 'transport.sugars.sucrose'                                                                                          |
| 676 | Mala | 1  | 16018451  | 32.20888865 | 5  | -0.010779957 | -77381 | '26.8'   | grmzm2g156<br>486_t01 | 'misc.nitrilases, *nitrile<br>lyases, berberine bridge<br>enzymes, reticuline<br>oxidases, troponine<br>reductases' |
| 677 | Mala | 1  | 16018768  | 32.20944008 | 34 | -0.010507566 | -77698 | '26.8'   | grmzm2g156<br>486_t01 | 'misc.nitrilases, *nitrile<br>lyases, berberine bridge<br>enzymes, reticuline<br>oxidases, troponine<br>reductases' |

|          |   |           |             |    |              |                                        |                       |                                                                                                                     |
|----------|---|-----------|-------------|----|--------------|----------------------------------------|-----------------------|---------------------------------------------------------------------------------------------------------------------|
| 678 Mala | 1 | 39323398  | 57.23255596 | 57 | 0.011761998  | -39918 '26.8'                          | grmzm2g141<br>799_t01 | 'misc.nitrilases, *nitrile<br>lyases, berberine bridge<br>enzymes, reticuline<br>oxidases, troponine<br>reductases' |
| 679 Mala | 1 | 40056302  | 57.91121791 | 14 | 0.007307404  | -57119 '16.10'                         | grmzm2g305<br>526_t01 | 'secondary<br>metabolism.simple<br>phenols'                                                                         |
| 680 Mala | 1 | 88319619  | 83.94252884 | 5  | 0.005107759  | '29.5.11. grmzm2g079<br>-394993 4.3.2' | 031_t01               | 'protein.degradation.ubiq<br>uitin.E3.SCF.FBOX'                                                                     |
| 681 Mala | 1 | 90444879  | 84.51213232 | 6  | 0.007232955  | -439 '30.5'                            | grmzm2g071<br>157_t01 | 'signalling.G-proteins'                                                                                             |
| 682 Mala | 1 | 210010258 | 121.8475905 | 9  | -0.007472494 | -1002 '30.2.11'                        | grmzm2g428<br>554_t01 | 'signalling.receptor<br>kinases.leucine rich<br>repeat XI'                                                          |
| 683 Mala | 1 | 219597467 | 128.6680693 | 5  | -0.010215717 | -85238 '20.2.1'                        | grmzm2g047<br>153_t01 | 'stress.abiotic.heat'                                                                                               |
| 684 Mala | 1 | 219599713 | 128.6689676 | 17 | -0.008622717 | -87484 '20.2.1'                        | grmzm2g047<br>153_t01 | 'stress.abiotic.heat'                                                                                               |
| 685 Mala | 1 | 222370635 | 129.7771875 | 21 | -0.010317833 | '29.5.11. grmzm2g067<br>-19140 4.3.2'  | 626_t01               | 'protein.degradation.ubiq<br>uitin.E3.SCF.FBOX'                                                                     |
| 686 Mala | 1 | 292093541 | 191.7018819 | 15 | 0.029138599  | -11869 '27.3.11'                       | grmzm2g061<br>897_t01 | 'RNA.regulation of<br>transcription.C2H2 zinc<br>finger family'                                                     |

|          |   |           |             |    |             |                        |                       |                                                                                              |
|----------|---|-----------|-------------|----|-------------|------------------------|-----------------------|----------------------------------------------------------------------------------------------|
| 687 Mala | 1 | 295777277 | 199.3871057 | 5  | 0.021925596 | -4116 '9.1.1'          | ac217358.3_f<br>gt005 | 'mitochondrial electron<br>transport / ATP<br>synthesis.NADH-<br>DH.complex I'               |
| 688 Mala | 2 | 2111645   | 4.01866061  | 8  | 0.006346054 | -41618 '27.3.5'        | grmzm2g040<br>736_t01 | 'RNA.regulation of<br>transcription.ARR'                                                     |
| 689 Mala | 2 | 2662790   | 6.10191746  | 5  | 0.012572964 | -40043 '30.3'          | grmzm2g065<br>012_t03 | 'signalling.calcium'                                                                         |
| 690 Mala | 2 | 4313222   | 12.01705821 | 7  | 0.008065261 | -41 '34.1'             | grmzm2g019<br>404_t01 | 'transport.p- and v-<br>ATPases'                                                             |
| 691 Mala | 2 | 4829815   | 13.98107797 | 14 | 0.007986073 | -141348 '34.18'        | grmzm2g086<br>920_t01 | 'transport.unspecified<br>anions'                                                            |
| 692 Mala | 2 | 5064142   | 14.87195891 | 10 | 0.009403602 | '13.2.3.1<br>-3390 .1' | grmzm2g531<br>230_t01 | 'amino acid<br>metabolism.degradation.<br>aspartate<br>family.asparagine.L-<br>asparaginase' |
| 693 Mala | 2 | 5064288   | 14.87251398 | 29 | 0.009676366 | '13.2.3.1<br>-3536 .1' | grmzm2g531<br>230_t01 | 'amino acid<br>metabolism.degradation.<br>aspartate<br>family.asparagine.L-<br>asparaginase' |
| 694 Mala | 2 | 5564443   | 16.77403859 | 17 | 0.007030808 | -44169 '33.99'         | grmzm2g174<br>784_t01 | 'development.unspecifie<br>d'                                                                |



|          |   |           |             |    |              |         |                     |                       |                                                                                                 |
|----------|---|-----------|-------------|----|--------------|---------|---------------------|-----------------------|-------------------------------------------------------------------------------------------------|
| 695 Mala | 2 | 38490452  | 66.37064702 | 10 | -0.008181854 | -150580 | '29.5.11'           | grmzm2g139<br>846_t01 | 'protein.degradation.ubiq<br>uitin'                                                             |
| 696 Mala | 2 | 53075256  | 72.33109749 | 67 | -0.01005034  | -274404 | '29.5.11.<br>4.3.2' | grmzm2g541<br>230_t01 | 'protein.degradation.ubiq<br>uitin.E3.SCF.FBOX'                                                 |
| 697 Mala | 2 | 121233141 | 77.09963877 | 6  | -0.008726546 | -108524 | '27.4'              | grmzm2g435<br>248_t01 | 'RNA.RNA binding'                                                                               |
| 698 Mala | 2 | 187425746 | 99.07896093 | 34 | 0.006597118  | -171106 | '16.8.3'            | grmzm2g078<br>480_t01 | 'secondary<br>metabolism.flavonoids.di<br>hydroflavonols'                                       |
| 699 Mala | 2 | 188442924 | 99.98704342 | 26 | 0.010380475  | -24124  | '29.2.1.2<br>.2.32' | grmzm2g047<br>971_t01 | 'protein.synthesis.riboso<br>mal<br>protein.eukaryotic.60S<br>subunit.L32'                      |
| 700 Mala | 2 | 190921710 | 102.1999719 | 13 | 0.007946425  | -9514   | '31.1'              | grmzm2g022<br>032_t01 | 'cell.organisation'                                                                             |
| 701 Mala | 2 | 190922255 | 102.2004584 | 6  | 0.005818998  | -10059  | '31.1'              | grmzm2g022<br>032_t01 | 'cell.organisation'                                                                             |
| 702 Mala | 2 | 208636969 | 118.3801568 | 72 | -0.009940999 | -30560  | '29.5.11.<br>4.2'   | grmzm2g358<br>987_t01 | 'protein.degradation.ubiq<br>uitin.E3.RING'                                                     |
| 703 Mala | 3 | 28560505  | 53.70440674 | 76 | 0.012754816  | -85335  | '27.3.67'           | grmzm2g075<br>320_t01 | 'RNA.regulation of<br>transcription.putative<br>transcription regulator'                        |
| 704 Mala | 3 | 110591868 | 58.89150506 | 6  | 0.009305688  | -241468 | '29.4.1.5<br>7'     | grmzm2g026<br>203_t01 | 'protein.postranslational<br>modification.kinase.rece<br>ptor like cytoplasmatic<br>kinase VII' |

|          |   |           |             |    |              |                        |                       |                                                                                                                             |
|----------|---|-----------|-------------|----|--------------|------------------------|-----------------------|-----------------------------------------------------------------------------------------------------------------------------|
| 705 Mala | 3 | 197969185 | 105.1512436 | 6  | 0.008872874  | -167761 '31.1'         | grmzm2g140<br>455_t01 | 'cell.organisation'                                                                                                         |
| 706 Mala | 3 | 200646842 | 108.1602931 | 7  | 0.006749729  | -35 '27.4'             | grmzm2g055<br>276_t01 | 'RNA.RNA binding'<br>'secondary<br>metabolism.phenylpropanoids.lignin<br>biosynthesis.4CL'                                  |
| 707 Mala | 3 | 207468446 | 116.9659734 | 5  | 0.007830782  | '16.2.1.3<br>-162418 ' | grmzm2g012<br>233_t02 | 'RNA.regulation of<br>transcription.ARF,<br>Auxin Response Factor<br>family'                                                |
| 708 Mala | 3 | 208722589 | 119.0297927 | 10 | 0.018556936  | -10314 '27.3.4'        | grmzm2g437<br>460_t01 | 'RNA.regulation of<br>transcription.ARF,<br>Auxin Response Factor<br>family'                                                |
| 709 Mala | 3 | 208759190 | 119.072271  | 7  | 0.018809679  | -46915 '27.3.4'        | grmzm2g437<br>460_t01 | 'RNA.regulation of<br>transcription.ARF,<br>Auxin Response Factor<br>family'                                                |
| 710 Mala | 3 | 213856232 | 126.6755216 | 29 | -0.008429835 | -52374 '26.2'          | grmzm2g048<br>010_t01 | 'misc.UDP glucosyl and<br>glucuronyl transferases'                                                                          |
| 711 Mala | 3 | 214330739 | 127.7703198 | 23 | -0.007870489 | -2029 '34.14'          | grmzm2g099<br>382_t01 | 'transport.unspecified<br>cations'                                                                                          |
| 712 Mala | 3 | 214355739 | 127.8009362 | 14 | -0.007817618 | -59 '10.6.3'           | grmzm2g037<br>431_t01 | 'cell<br>wall.degradation.pectate<br>lyases and<br>polygalacturonases'<br>'RNA.regulation of<br>transcription.unclassified' |
| 713 Mala | 3 | 223533563 | 145.1258349 | 43 | -0.006537456 | -33379 '27.3.99'       | grmzm2g002<br>646_t01 | '                                                                                                                           |
| 714 Mala | 4 | 170999854 | 79.42178824 | 8  | -0.017758613 | -123363 '16.8.3'       | grmzm2g099<br>420_t01 | 'secondary<br>metabolism.flavonoids.dihydroflavonols'                                                                       |

|          |   |           |             |    |              |                                             |                                                                                                 |
|----------|---|-----------|-------------|----|--------------|---------------------------------------------|-------------------------------------------------------------------------------------------------|
| 715 Mala | 4 | 171775102 | 80.83509484 | 83 | -0.010613833 | '29.5.11. grmzm2g130<br>-2697 4.2' 002_t01  | 'protein.degradation.ubiq<br>uitin.E3.RING'                                                     |
| 716 Mala | 4 | 180344878 | 93.24990822 | 5  | 0.026764303  | grmzm2g021<br>-26662 '4.3.12' 605_t01       | 'glycolysis.unclear/dually<br>targeted.phosphoglycerat<br>e mutase'                             |
| 717 Mala | 5 | 2767759   | 7.538649577 | 9  | -0.023022027 | grmzm2g107<br>-75102 '16.8.3' 076_t01       | 'secondary<br>metabolism.flavonoids.di<br>hydroflavonols'                                       |
| 718 Mala | 5 | 4189784   | 13.29548628 | 8  | -0.024817481 | grmzm2g302<br>-39184 '27.3.25' 549_t01      | 'RNA.regulation of<br>transcription.MYB<br>domain transcription<br>factor family'               |
| 719 Mala | 5 | 5266701   | 18.78312331 | 16 | -0.018541237 | grmzm2g377<br>-31341 '34.4' 555_t01         | 'transport.nitrate'                                                                             |
| 720 Mala | 5 | 25580476  | 54.40578016 | 17 | 0.006381893  | grmzm2g305<br>-204438 '34.19.2' 446_t01     | 'transport.Major Intrinsic<br>Proteins.TIP'                                                     |
| 721 Mala | 5 | 35870702  | 58.15768893 | 9  | 0.007312398  | '29.4.1.5 grmzm2g110<br>-12081 7' 968_t01   | 'protein.postranslational<br>modification.kinase.rece<br>ptor like cytoplasmatic<br>kinase VII' |
| 722 Mala | 5 | 159516767 | 75.22607915 | 59 | 0.006946802  | grmzm2g411<br>-7921 '29.5.4' 333_t01        | 'protein.degradation.aspa<br>rtate protease'                                                    |
| 723 Mala | 5 | 196990966 | 105.0448056 | 21 | -0.006739831 | '29.5.11. grmzm2g039<br>-56418 4.2' 725_t01 | 'protein.degradation.ubiq<br>uitin.E3.RING'                                                     |

|          |   |           |              |    |              |                                       |                       |                                                                           |
|----------|---|-----------|--------------|----|--------------|---------------------------------------|-----------------------|---------------------------------------------------------------------------|
| 724 Mala | 5 | 196991427 | 105.0451889  | 6  | -0.007454933 | '29.5.11. grmzm2g039<br>-56879 4.2'   | 725_t01               | 'protein.degradation.ubiq<br>uitin.E3.RING'                               |
| 725 Mala | 5 | 213281396 | 144.5097958  | 5  | -0.007254868 | '29.5.11. grmzm2g467<br>-6627 4.2'    | 756_t01               | 'protein.degradation.ubiq<br>uitin.E3.RING'                               |
| 726 Mala | 5 | 214193499 | 148.7600372  | 10 | -0.005516584 | -1364 '30.5'                          | grmzm2g150<br>876_t01 | 'signalling.G-proteins'                                                   |
| 727 Mala | 6 | 2173089   | -8.383242223 | 8  | -0.007048492 | -118322 '29.5'                        | grmzm2g313<br>321_t01 | 'protein.degradation'                                                     |
| 728 Mala | 6 | 3682882   | -6.670271784 | 7  | -0.007945361 | '29.5.11. grmzm2g104<br>-30711 4.2'   | 769_t01               | 'protein.degradation.ubiq<br>uitin.E3.RING'                               |
| 729 Mala | 6 | 6894842   | -3.026068551 | 6  | -0.005310972 | '29.5.11. grmzm2g390<br>-189308 4.2'  | 009_t01               | 'protein.degradation.ubiq<br>uitin.E3.RING'                               |
| 730 Mala | 6 | 9251251   | -0.35255042  | 21 | -0.006131661 | '29.2.1.2 grmzm2g066<br>-55591 .2.80' | 460_t01               | 'protein.synthesis.riboso<br>mal<br>protein.eukaryotic.60S<br>subunit.P0' |
| 731 Mala | 6 | 160133599 | 84.08459515  | 7  | -0.010156075 | '29.5.11. grmzm2g004<br>-6608 4.3.2'  | 592_t01               | 'protein.degradation.ubiq<br>uitin.E3.SCF.FBOX'                           |
| 732 Mala | 6 | 161832235 | 87.63268966  | 6  | -0.009770832 | -53727 '28.1'                         | grmzm2g121<br>186_t01 | 'DNA.synthesis/chromati<br>n structure'                                   |
| 733 Mala | 6 | 162218871 | 89.54447098  | 6  | -0.006148267 | -489 '20.2.1'                         | grmzm2g175<br>089_t01 | 'stress.abiotic.heat'                                                     |
| 734 Mala | 6 | 162665812 | 91.75443968  | 12 | -0.008612649 | -714 '26.2'                           | grmzm2g059<br>845_t01 | 'misc.UDP glucosyl and<br>glucoronyl transferases'                        |

|          |   |           |             |    |              |                  |                       |                                                                     |
|----------|---|-----------|-------------|----|--------------|------------------|-----------------------|---------------------------------------------------------------------|
| 735 Mala | 6 | 163284243 | 94.27967325 | 19 | -0.005380966 | -371 '1.1.5.2'   | grmzm2g481<br>261_t01 | 'PS.lightreaction.other<br>electron carrier<br>(ox/red).ferredoxin' |
| 736 Mala | 6 | 165585617 | 102.9436765 | 17 | -0.006076029 | -85808 '30.11'   | grmzm2g145<br>556_t01 | 'signalling.light'                                                  |
| 737 Mala | 7 | 118340956 | 59.84562968 | 7  | -0.012097666 | -114501 '34.15'  | grmzm2g088<br>964_t01 | 'transport.potassium'                                               |
| 738 Mala | 7 | 131033445 | 71.16406426 | 19 | -0.009077321 | -51423 '7.2.3'   | grmzm2g083<br>102_t01 | 'OPP.non-reductive<br>PP.ribulose-phosphate 3-<br>epimerase'        |
| 739 Mala | 7 | 143058340 | 81.14259414 | 5  | -0.006769154 | -22803 '27.3.99' | grmzm2g007<br>190_t01 | 'RNA.regulation of<br>transcription.unclassified<br>'               |
| 740 Mala | 7 | 145583488 | 83.49098005 | 9  | -0.005789243 | -2637 '26.2'     | grmzm2g155<br>911_t01 | 'misc.UDP glucosyl and<br>glucuronyl transferases'                  |
| 741 Mala | 7 | 146746400 | 84.65040768 | 13 | -0.007872159 | -37064 '14.2'    | ac189750.4_f<br>gt004 | 'S-assimilation.APR'                                                |
| 742 Mala | 7 | 163624094 | 115.764038  | 48 | 0.012940535  | -17529 '29.4'    | grmzm2g013<br>652_t01 | 'protein.postranslational<br>modification'                          |

|          |   |           |             |    |             |                  |                       |                                                                                                                        |
|----------|---|-----------|-------------|----|-------------|------------------|-----------------------|------------------------------------------------------------------------------------------------------------------------|
| 743 Mala | 7 | 166492884 | 123.1295455 | 11 | 0.009047583 | -2523 '27.3.3'   | grmzm2g307<br>119_t01 | 'RNA.regulation of<br>transcription.AP2/EREB<br>P, APETALA2/Ethylene-<br>responsive element<br>binding protein family' |
| 744 Mala | 7 | 166493179 | 123.1308276 | 67 | 0.011080937 | -2818 '27.3.3'   | grmzm2g307<br>119_t01 | 'RNA.regulation of<br>transcription.AP2/EREB<br>P, APETALA2/Ethylene-<br>responsive element<br>binding protein family' |
| 745 Mala | 7 | 167073361 | 125.6523612 | 6  | 0.009385491 | -1066 '26.12'    | grmzm2g126<br>261_t01 | 'misc.peroxidases'                                                                                                     |
| 746 Mala | 7 | 167122054 | 125.8639863 | 17 | 0.012150093 | -13256 '29.4'    | grmzm2g177<br>050_t01 | 'protein.postranslational<br>modification'                                                                             |
| 747 Mala | 8 | 100197210 | 57.57868238 | 6  | 0.00790012  | -153647 '11.1.5' | grmzm2g055<br>667_t01 | 'lipid metabolism.FA<br>synthesis and FA<br>elongation.beta<br>hydroxyacyl ACP<br>dehydratase'                         |
| 748 Mala | 8 | 108849390 | 60.58220759 | 51 | 0.005689455 | -37848 '30.5'    | grmzm2g150<br>724_t01 | 'signalling.G-proteins'                                                                                                |
| 749 Mala | 8 | 120917873 | 65.51878959 | 5  | 0.008136638 | -43495 '27.3.17' | grmzm2g173<br>198_t01 | 'RNA.regulation of<br>transcription.CPP(Zn),C<br>PP1-related transcription<br>factor family'                           |
| 750 Mala | 8 | 154959713 | 81.88784605 | 10 | 0.012371157 | -2361 '26.7'     | grmzm2g017<br>193_t01 | 'misc.oxidases - copper,<br>flavone etc.'                                                                              |

|          |    |           |              |    |              |                             |                       |                                                                                          |
|----------|----|-----------|--------------|----|--------------|-----------------------------|-----------------------|------------------------------------------------------------------------------------------|
| 751 Mala | 8  | 159784012 | 88.41830479  | 12 | 0.012070302  | '29.2.1.1<br>-4318 .1.2.27' | grmzm2g145<br>496_t01 | 'protein.synthesis.riboso<br>mal<br>protein.prokaryotic.chlor<br>oplast.50S subunit.L27' |
| 752 Mala | 9  | 91767617  | 47.59229769  | 5  | 0.009468398  | -117378 '27.3.71'           | grmzm2g117<br>935_t01 | 'RNA.regulation of<br>transcription.SNF7'                                                |
| 753 Mala | 9  | 109432591 | 53.84671075  | 14 | 0.010241133  | -121520 '3.5'               | grmzm2g144<br>245_t01 | 'minor CHO<br>metabolism.others'                                                         |
| 754 Mala | 10 | 1210362   | -2.349387514 | 15 | -0.017276952 | -8498 '29.4'                | grmzm2g430<br>780_t01 | 'protein.postranslational<br>modification'                                               |
| 755 Mala | 10 | 1431221   | -1.586267435 | 6  | 0.011410568  | -22381 '29.5.1'             | grmzm2g012<br>062_t01 | 'protein.degradation.subt<br>ilases'                                                     |
| 756 Mala | 10 | 1467050   | -1.462469767 | 16 | 0.006758966  | -22947 '30.3'               | grmzm2g104<br>730_t01 | 'signalling.calcium'                                                                     |
| 757 Mala | 10 | 2275477   | 1.330836713  | 6  | 0.006068756  | -6178 '23.2'                | grmzm2g431<br>714_t01 | 'nucleotide<br>metabolism.degradation'                                                   |
| 758 Mala | 10 | 2592048   | 2.424664387  | 5  | 0.008847718  | '17.3.1.2<br>-18 .3'        | grmzm2g068<br>465_t02 | 'hormone<br>metabolism.brassinoster<br>oid.synthesis-<br>degradation.sterols.CYP<br>51'  |
| 759 Mala | 10 | 4201480   | 8.961984916  | 5  | 0.006361453  | -8213 '29.5'                | grmzm2g003<br>750_t01 | 'protein.degradation'                                                                    |

|     |      |    |           |             |    |             |                            |                       |                                                                                                                     |
|-----|------|----|-----------|-------------|----|-------------|----------------------------|-----------------------|---------------------------------------------------------------------------------------------------------------------|
| 760 | Mala | 10 | 145447601 | 86.78325234 | 17 | 0.007756603 | '13.1.5.1<br>-93217 .1'    | grmzm2g009<br>323_t01 | 'amino acid<br>metabolism.synthesis.ser<br>ine-glycine-cysteine<br>group.serine.phosphogly<br>cerate dehydrogenase' |
| 761 | Mala | 10 | 145456506 | 86.81879521 | 5  | 0.008987877 | -282 '18.3.2'              | grmzm2g143<br>480_t02 | 'Co-factor and vitamine<br>metabolism.riboflavin.ri<br>boflavin synthase'                                           |
| 762 | Mala | 10 | 145674099 | 87.6872826  | 67 | 0.007733533 | -3191 '30.11'              | grmzm2g104<br>268_t01 | 'signalling.light'                                                                                                  |
| 763 | Mala | 10 | 145733506 | 87.92439606 | 8  | 0.009243772 | -5331 '30.2.17'            | grmzm2g007<br>477_t01 | 'signalling.receptor<br>kinases.DUF 26'                                                                             |
| 764 | Nitr | 1  | 5563538   | 9.70193737  | 75 | 0.003559647 | -47902 '29.4'              | grmzm2g055<br>575_t01 | 'protein.postranslational<br>modification'                                                                          |
| 765 | Nitr | 1  | 51114082  | 65.50613364 | 11 | 0.003292823 | -301239 '33.99'            | ac208571.4_f<br>gt001 | 'development.unspecifie<br>d'                                                                                       |
| 766 | Nitr | 1  | 60210415  | 71.99893136 | 5  | 0.002949116 | '29.5.11.<br>-43502 4.3.2' | grmzm2g378<br>907_t01 | 'protein.degradation.ubiq<br>uitin.E3.SCF.FBOX'                                                                     |
| 767 | Nitr | 1  | 63667791  | 73.22732147 | 7  | 0.00318244  | -229 '26.12'               | grmzm2g040<br>638_t01 | 'misc.peroxidases'                                                                                                  |



|          |   |           |             |    |              |                  |                       |                                                                                                                        |
|----------|---|-----------|-------------|----|--------------|------------------|-----------------------|------------------------------------------------------------------------------------------------------------------------|
| 768 Nitr | 1 | 199491006 | 112.8925649 | 7  | -0.000697051 | -5829 '2.2.2.1'  | grmzm2g070<br>172_t01 | 'major CHO<br>metabolism.degradation.<br>starch.starch cleavage'                                                       |
| 769 Nitr | 1 | 201845500 | 115.3791094 | 11 | -0.000756257 | -56519 '27.3.3'  | grmzm2g028<br>386_t01 | 'RNA.regulation of<br>transcription.AP2/EREB<br>P, APETALA2/Ethylene-<br>responsive element<br>binding protein family' |
| 770 Nitr | 1 | 201991158 | 115.4795854 | 6  | -0.003767123 | -176 '30.2.3'    | grmzm2g422<br>373_t01 | 'signalling.receptor<br>kinases.leucine rich<br>repeat III'                                                            |
| 771 Nitr | 1 | 202621762 | 115.91      | 5  | -0.0043      | -81958 '27.3.27' | grmzm2g340<br>305_t01 | 'RNA.regulation of<br>transcription.NAC<br>domain transcription<br>factor family'                                      |
| 772 Nitr | 1 | 207277145 | 119.465065  | 11 | -0.000793889 | -153292 '17.4.1' | grmzm2g348<br>452_t01 | 'hormone<br>metabolism.cytokinin.sy<br>nthesis-degradation'                                                            |
| 773 Nitr | 1 | 207279145 | 119.4669916 | 8  | -0.000840239 | -1952 '20.2.99'  | grmzm2g363<br>004_t01 | 'stress.abiotic.unspecifie<br>d'                                                                                       |
| 774 Nitr | 1 | 207313090 | 119.4996915 | 12 | -0.000961106 | -10069 '20.2.99' | ac195794.3_f<br>gt002 | 'stress.abiotic.unspecifie<br>d'                                                                                       |

|          |   |           |             |    |              |                          |                       |                                                                          |
|----------|---|-----------|-------------|----|--------------|--------------------------|-----------------------|--------------------------------------------------------------------------|
| 775 Nitr | 1 | 224410655 | 132.7669157 | 12 | -0.0094014   | -103813 '28.1'           | grmzm2g168<br>744_t01 | 'DNA.synthesis/chromatin structure'                                      |
| 776 Nitr | 1 | 232515055 | 138.1818938 | 6  | 0.011437559  | -163695 '30.3'           | grmzm2g117<br>763_t01 | 'signalling.calcium'                                                     |
| 777 Nitr | 1 | 233097149 | 138.4111567 | 9  | 0.012678888  | '29.5.11.4.2'<br>-168640 | grmzm2g343<br>972_t01 | 'protein.degradation.ubiquitin.E3.RING'                                  |
| 778 Nitr | 1 | 249984566 | 148.2769963 | 25 | 0.000988754  | -19857 '27.3.25'         | grmzm2g121<br>570_t01 | 'RNA.regulation of transcription.MYB domain transcription factor family' |
| 779 Nitr | 1 | 254217830 | 150.9046175 | 9  | 0.040341299  | -26746 '29.4'            | grmzm2g081<br>915_t01 | 'protein.postranslational modification'                                  |
| 780 Nitr | 1 | 254218603 | 150.9052401 | 13 | 0.038373926  | -27519 '29.4'            | grmzm2g081<br>915_t01 | 'protein.postranslational modification'                                  |
| 781 Nitr | 1 | 256241409 | 152.3975751 | 16 | 1.893176617  | -142311 '29.4'           | grmzm2g357<br>081_t01 | 'protein.postranslational modification'                                  |
| 782 Nitr | 1 | 256250277 | 152.4041229 | 6  | -3.973615173 | -2800 '27.3.50'          | grmzm2g018<br>414_t01 | 'RNA.regulation of transcription.General Transcription'                  |

|          |   |           |              |    |              |                  |                       |                                                                                         |
|----------|---|-----------|--------------|----|--------------|------------------|-----------------------|-----------------------------------------------------------------------------------------|
| 783 Nitr | 1 | 256300512 | 152.4470842  | 7  | -0.373608989 | -53035 '27.3.50' | grmzm2g018<br>414_t01 | 'RNA.regulation of<br>transcription.General<br>Transcription'                           |
| 784 Nitr | 1 | 257414838 | 153.4001486  | 40 | -0.007243298 | -31055 '34.12'   | grmzm2g118<br>821_t01 | 'transport.metal'                                                                       |
| 785 Nitr | 1 | 297905073 | 202.4622232  | 6  | -0.001303846 | -55516 '27.1'    | grmzm2g422<br>649_t01 | 'RNA.processing'                                                                        |
| 786 Nitr | 2 | 3805      | -5.496235757 | 26 | 0.001182912  |                  |                       |                                                                                         |
| 787 Nitr | 2 | 2023274   | 3.619749446  | 24 | 0.001176073  | -16113 '1.1.1.1' | grmzm2g039<br>996_t01 | 'PS.lightreaction.photosy<br>stem II.LHC-II'                                            |
| 788 Nitr | 2 | 2211917   | 4.471293489  | 10 | 0.001669864  | -141890 '27.3.5' | grmzm2g040<br>736_t01 | 'RNA.regulation of<br>transcription.ARR'                                                |
| 789 Nitr | 2 | 2491029   | 5.715556905  | 6  | 0.000821883  | -5964 '11.3.3'   | grmzm2g104<br>538_t01 | 'lipid<br>metabolism.Phospholipi<br>d<br>synthesis.phosphatidate<br>cytidyltransferase' |
| 790 Nitr | 2 | 9387311   | 27.56530943  | 6  | 0.001306219  | -39933 '30.2.17' | grmzm2g165<br>060_t01 | 'signalling.receptor<br>kinases.DUF 26'                                                 |
| 791 Nitr | 2 | 31005737  | 62.07871475  | 22 | 0.001211646  | -28612 '29.5.4'  | grmzm2g333<br>408_t01 | 'protein.degradation.aspa<br>rtate protease'                                            |

|          |   |           |             |    |             |                        |                       |                                                          |
|----------|---|-----------|-------------|----|-------------|------------------------|-----------------------|----------------------------------------------------------|
| 792 Nitr | 2 | 36815670  | 65.26831102 | 10 | 0.001463549 | -9696 '6.2'            | grmzm2g102<br>183_t01 | 'gluconeogenese/<br>glyoxylate cycle.malate<br>synthase' |
| 793 Nitr | 2 | 37323751  | 65.60272826 | 11 | 0.002275836 | '29.5.11.<br>-12829 1' | grmzm2g045<br>117_t01 | 'protein.degradation.ubiq<br>uitin.ubiquitin'            |
| 794 Nitr | 2 | 181079834 | 90.99646529 | 39 | 0.001816495 | -428 '1.1.2.1'         | grmzm2g117<br>412_t01 | 'PS.lightreaction.photosy<br>stem I.LHC-I'               |
| 795 Nitr | 2 | 182483954 | 92.38830408 | 38 | 0.001818773 | -87084 '29.5'          | grmzm2g065<br>665_t01 | 'protein.degradation'                                    |
| 796 Nitr | 2 | 183983052 | 94.29078232 | 8  | 0.002369111 | -41357 '33.1'          | grmzm2g123<br>764_t01 | 'development.storage<br>proteins'                        |
| 797 Nitr | 2 | 186765944 | 97.99865221 | 7  | 0.001224906 | -41498 '20.2.1'        | grmzm2g474<br>367_t01 | 'stress.abiotic.heat'                                    |
| 798 Nitr | 2 | 203303901 | 111.3475511 | 5  | 0.002210804 | -101264 '16.8.2'       | grmzm2g060<br>011_t01 | 'secondary<br>metabolism.flavonoids.c<br>halcones'       |
| 799 Nitr | 2 | 211231604 | 122.5790956 | 20 | 0.002091497 | -41931 '20.1'          | grmzm2g379<br>770_t01 | 'stress.biotic'                                          |
| 800 Nitr | 2 | 212538395 | 124.4779034 | 10 | 0.002047508 | -28619 '29.4'          | grmzm2g131<br>554_t01 | 'protein.postranslational<br>modification'               |
| 801 Nitr | 3 | 8109850   | 29.6995263  | 14 | 0.003636405 | -26893 '31.2'          | grmzm2g576<br>002_t01 | 'cell.division'                                          |
| 802 Nitr | 3 | 8678939   | 31.22826072 | 19 | 0.003500894 | -7 '20.1'              | grmzm2g083<br>797_t01 | 'stress.biotic'                                          |

|          |   |           |             |    |              |                              |                       |                                                                                  |
|----------|---|-----------|-------------|----|--------------|------------------------------|-----------------------|----------------------------------------------------------------------------------|
| 803 Nitr | 3 | 8924944   | 31.88908441 | 11 | 0.003569052  | -10040 '28.1'                | grmzm2g355<br>381_t01 | 'DNA.synthesis/chromatin structure'                                              |
| 804 Nitr | 3 | 158547954 | 71.48562889 | 28 | 0.000938613  | -66241 '31.4'                | grmzm2g436<br>742_t01 | 'cell.vesicle transport'                                                         |
| 805 Nitr | 3 | 210217529 | 120.7696561 | 15 | -0.000777862 | '29.2.1.1<br>-48203 .1.2.12' | grmzm2g360<br>021_t01 | 'protein.synthesis.ribosomal<br>protein.prokaryotic.chloroplast.50S subunit.L12' |
| 806 Nitr | 3 | 212234516 | 123.2864138 | 11 | -0.00092326  | '13.1.4.1<br>-174659 '       | grmzm2g004<br>382_t01 | 'amino acid<br>metabolism.synthesis.branched chain<br>group.common'              |
| 807 Nitr | 3 | 212247177 | 123.3022119 | 10 | -0.000811602 | -635 '16.7'                  | grmzm2g349<br>407_t01 | 'secondary<br>metabolism.wax'                                                    |
| 808 Nitr | 3 | 212248108 | 123.3033736 | 27 | -0.000852191 | -1566 '16.7'                 | grmzm2g349<br>407_t01 | 'secondary<br>metabolism.wax'                                                    |
| 809 Nitr | 3 | 212248700 | 123.3041123 | 15 | -0.000804228 | -2158 '16.7'                 | grmzm2g349<br>407_t01 | 'secondary<br>metabolism.wax'                                                    |
| 810 Nitr | 3 | 213848077 | 126.6554907 | 7  | -0.000894249 | -44219 '26.2'                | grmzm2g048<br>010_t01 | 'misc.UDP glucosyl and<br>glucuronyl transferases'                               |
| 811 Nitr | 4 | 11351925  | 31.69382335 | 5  | -0.003583568 | -144988 '27.3.80'            | grmzm2g068<br>330_t01 | 'RNA.regulation of<br>transcription.zf-HD'                                       |
| 812 Nitr | 4 | 11970641  | 33.81499619 | 6  | -0.003758507 | -113036 '16.2'               | grmzm2g017<br>557_t01 | 'secondary<br>metabolism.phenylpropenoids'                                       |

|          |   |           |             |    |              |                                            |                                                                                                                              |
|----------|---|-----------|-------------|----|--------------|--------------------------------------------|------------------------------------------------------------------------------------------------------------------------------|
| 813 Nitr | 4 | 25849988  | 48.23626239 | 5  | 0.001059419  | '29.3.4.9 grmzm2g147<br>-186185 9' 726_t02 | 'protein.targeting.secreto<br>ry pathway.unspecified'                                                                        |
| 814 Nitr | 4 | 25850469  | 48.23645002 | 7  | 0.001284805  | '29.3.4.9 grmzm2g147<br>-186666 9' 726_t02 | 'protein.targeting.secreto<br>ry pathway.unspecified'                                                                        |
| 815 Nitr | 4 | 28177658  | 49.14422457 | 25 | 0.002716247  | grmzm2g125<br>-6686 '31.2' 151_t01         | 'cell.division'                                                                                                              |
| 816 Nitr | 4 | 28839372  | 49.4032225  | 7  | 0.005200168  | grmzm2g130<br>-135 '27.3.22' 442_t01       | 'RNA.regulation of<br>transcription.HB,Homeo<br>box transcription factor<br>family'                                          |
| 817 Nitr | 4 | 101964449 | 57.85755427 | 9  | 0.003029113  | ac207890.3_f<br>-148863 '27.3.73' gt002    | 'RNA.regulation of<br>transcription.Zn-<br>finger(CCHC)'                                                                     |
| 818 Nitr | 4 | 110010755 | 58.02556787 | 12 | 0.001209715  | grmzm2g118<br>-679305 '27.3.35' 870_t02    | 'RNA.regulation of<br>transcription.bZIP<br>transcription factor<br>family'                                                  |
| 819 Nitr | 4 | 130200550 | 58.67643598 | 10 | 0.001469707  | grmzm2g390<br>-3265 '31.4' 691_t01         | 'cell.vesicle transport'<br>'RNA.regulation of<br>transcription.Trihelix,<br>Triple-Helix<br>transcription factor<br>family' |
| 820 Nitr | 4 | 149531302 | 61.9954463  | 8  | 0.004684307  | grmzm2g063<br>-506860 '27.3.30' 203_t01    | 'RNA.regulation of<br>transcription.putative<br>transcription regulator'                                                     |
| 821 Nitr | 4 | 163054280 | 73.24125003 | 10 | -0.002480041 | grmzm2g411<br>-66034 '27.3.67' 032_t01     | 'RNA.regulation of<br>transcription.putative<br>transcription regulator'                                                     |

|     |      |   |           |             |    |              |         |           |                       |                                                                                                                        |
|-----|------|---|-----------|-------------|----|--------------|---------|-----------|-----------------------|------------------------------------------------------------------------------------------------------------------------|
| 822 | Nitr | 4 | 163084391 | 73.26227648 | 17 | -0.002987557 | -29558  | '27.3.99' | grmzm2g141<br>036_t01 | 'RNA.regulation of<br>transcription.unclassified<br>'                                                                  |
| 823 | Nitr | 4 | 165718843 | 75.10190893 | 25 | -0.003343143 | -145301 | '27.3.99' | grmzm2g444<br>623_t02 | 'RNA.regulation of<br>transcription.unclassified<br>'                                                                  |
| 824 | Nitr | 4 | 166175217 | 75.86       | 5  | -0.0009      | -9468   | '17.2.3'  | grmzm2g015<br>049_t01 | 'hormone<br>metabolism.auxin.induce<br>d-regulated-responsive-<br>activated'                                           |
| 825 | Nitr | 4 | 167831848 | 76.66597097 | 7  | -0.002511466 | -500    | '11.9.3.4 | grmzm2g045<br>294_t01 | 'lipid metabolism.lipid<br>degradation.lysophospho<br>lipases.phospholipase<br>A2'                                     |
| 826 | Nitr | 4 | 170457980 | 78.38642641 | 8  | -0.002662805 | -151878 | '15.2'    | grmzm2g120<br>964_t01 | 'metal handling.binding,<br>chelation and storage'                                                                     |
| 827 | Nitr | 4 | 177460609 | 88.85205365 | 6  | -0.000971011 | -449    | '27.3.3'  | grmzm2g011<br>110_t01 | 'RNA.regulation of<br>transcription.AP2/EREB<br>P, APETALA2/Ethylene-<br>responsive element<br>binding protein family' |
| 828 | Nitr | 4 | 179532567 | 92.44677404 | 28 | -0.002935932 | -8453   | '26.2'    | grmzm2g383<br>920_t01 | 'misc.UDP glucosyl and<br>glucuronyl transferases'                                                                     |
| 829 | Nitr | 4 | 242018406 | 128.094256  | 5  | -0.026531277 | -17517  | '13.2.5.3 | grmzm2g168<br>888_t01 | 'amino acid<br>metabolism.degradation.<br>serine-glycine-cysteine<br>group.cysteine'                                   |
| 830 | Nitr | 4 | 242343398 | 129.4163957 | 6  | 0.793685036  | -3229   | '26.19'   | grmzm2g101<br>872_t01 | 'misc.plastocyanin-like'                                                                                               |

|          |   |           |             |    |             |                                                |                                                                                   |
|----------|---|-----------|-------------|----|-------------|------------------------------------------------|-----------------------------------------------------------------------------------|
| 831 Nitr | 5 | 4862213   | 16.72130612 | 9  | 0.003196165 | '29.5.11. ac155496.2_f<br>-93667 4.3.3' gt009  | 'protein.degradation.ubiq<br>uitin.E3.SCF.cullin'                                 |
| 832 Nitr | 5 | 4925927   | 17.04607872 | 10 | 0.002167269 | grmzm2g089<br>-21244 '27.3.29' 361_t01         | 'RNA.regulation of<br>transcription.TCP<br>transcription factor<br>family'        |
| 833 Nitr | 5 | 7664787   | 29.12019513 | 5  | 0.001140887 | grmzm2g014<br>-95582 '29.4' 618_t01            | 'protein.postranslational<br>modification'                                        |
| 834 Nitr | 5 | 162808563 | 76.42708275 | 6  | 0.003808286 | '29.5.11. grmzm2g011<br>-120194 4.3.2' 627_t01 | 'protein.degradation.ubiq<br>uitin.E3.SCF.FBOX'                                   |
| 835 Nitr | 5 | 184229490 | 93.51868254 | 5  | 0.001723644 | grmzm2g043<br>-306984 '27.2' 461_t02           | 'RNA.transcription'                                                               |
| 836 Nitr | 5 | 184794208 | 94.16914109 | 6  | 0.001178069 | '29.5.11. grmzm2g094<br>-47176 4.2' 602_t01    | 'protein.degradation.ubiq<br>uitin.E3.RING'                                       |
| 837 Nitr | 5 | 185030768 | 94.44161776 | 7  | 0.001440241 | '29.5.11. grmzm2g362<br>-81869 4.2' 883_t01    | 'protein.degradation.ubiq<br>uitin.E3.RING'                                       |
| 838 Nitr | 5 | 185056309 | 94.47103662 | 10 | 0.001491703 | '29.5.11. grmzm2g362<br>-107410 4.2' 883_t01   | 'protein.degradation.ubiq<br>uitin.E3.RING'                                       |
| 839 Nitr | 5 | 185687667 | 95.19825306 | 8  | 0.001158127 | grmzm2g095<br>-90894 '27.3.25' 904_t01         | 'RNA.regulation of<br>transcription.MYB<br>domain transcription<br>factor family' |
| 840 Nitr | 5 | 185860200 | 95.39698157 | 5  | 0.000263629 | '23.3.2.1 grmzm2g540<br>-160417 ' 538_t01      | 'nucleotide<br>metabolism.salvage.nucl<br>eoside kinases.adenosine<br>kinase'     |



|     |      |   |           |             |    |              |        |               |                       |                                                                                                                        |
|-----|------|---|-----------|-------------|----|--------------|--------|---------------|-----------------------|------------------------------------------------------------------------------------------------------------------------|
| 841 | Nitr | 5 | 190089272 | 99.5622766  | 29 | -0.023979728 | -21    | '31.3'        | grmzm2g160<br>563_t02 | 'cell.cycle'                                                                                                           |
| 842 | Nitr | 5 | 190169366 | 99.64088567 | 25 | -0.032819686 | -78164 | '31.3'        | grmzm2g160<br>563_t01 | 'cell.cycle'                                                                                                           |
| 843 | Nitr | 5 | 190751918 | 100.0087423 | 59 | 0.060946443  | -44375 | '27.3.3'      | grmzm2g466<br>044_t01 | 'RNA.regulation of<br>transcription.AP2/EREB<br>P, APETALA2/Ethylene-<br>responsive element<br>binding protein family' |
| 844 | Nitr | 5 | 191728507 | 101.2378277 | 61 | -0.033148662 | -128   | '11.9.4.5     | grmzm2g004<br>752_t01 | 'lipid metabolism.lipid<br>degradation.beta-<br>oxidation.acyl-CoA<br>thioesterase'                                    |
| 845 | Nitr | 5 | 205478714 | 119.252956  | 9  | -0.001744117 | -4714  | '29.5.11.4.2' | grmzm2g053<br>303_t01 | 'protein.degradation.ubiq<br>uitin.E3.RING'                                                                            |
| 846 | Nitr | 5 | 205662825 | 119.8501543 | 20 | -0.001468083 | -12994 | '17.2.2'      | grmzm2g074<br>267_t01 | 'hormone<br>metabolism.auxin.signal<br>transduction'                                                                   |
| 847 | Nitr | 5 | 205964077 | 120.8273212 | 11 | -0.000771887 | -23060 | '23.2'        | grmzm2g114<br>362_t01 | 'nucleotide<br>metabolism.degradation'                                                                                 |
| 848 | Nitr | 5 | 207101210 | 124.0824263 | 25 | -0.003509329 | -6661  | '27.3.3'      | grmzm2g055<br>204_t01 | 'RNA.regulation of<br>transcription.AP2/EREB<br>P, APETALA2/Ethylene-<br>responsive element<br>binding protein family' |
| 849 | Nitr | 5 | 207118376 | 124.1210629 | 12 | -0.000821003 | -9719  | '26.2'        | grmzm2g055<br>124_t01 | 'misc.UDP glucosyl and<br>glucoronyl transferases'                                                                     |

|          |   |           |             |    |              |         |               |                       |                                                                                                                        |
|----------|---|-----------|-------------|----|--------------|---------|---------------|-----------------------|------------------------------------------------------------------------------------------------------------------------|
| 850 Nitr | 5 | 207498927 | 124.9743369 | 13 | -0.003573299 | -106864 | '31.1'        | grmzm2g061<br>950_t01 | 'cell.organisation'                                                                                                    |
| 851 Nitr | 5 | 211861691 | 137.9485929 | 9  | -0.00209302  | -5262   | '20.1'        | grmzm2g008<br>406_t01 | 'stress.biotic'                                                                                                        |
| 852 Nitr | 6 | 78467563  | 11.02628868 | 8  | 0.00613447   | -71172  | '27.3.3'      | grmzm2g119<br>865_t01 | 'RNA.regulation of<br>transcription.AP2/EREB<br>P, APETALA2/Ethylene-<br>responsive element<br>binding protein family' |
| 853 Nitr | 6 | 92041721  | 18.74190429 | 8  | -0.007360541 | -52362  | '27.3.26'     | grmzm2g057<br>408_t01 | 'RNA.regulation of<br>transcription.MYB-<br>related transcription<br>factor family'                                    |
| 854 Nitr | 6 | 164046344 | 96.23353408 | 8  | 0.00311268   | -72666  | '18'          | grmzm2g085<br>483_t01 | 'Co-factor and vitamine<br>metabolism'                                                                                 |
| 855 Nitr | 7 | 94080369  | 50.29845615 | 7  | -0.002187415 | -149429 | '15.2'        | grmzm2g086<br>066_t01 | 'metal handling.binding,<br>chelation and storage'                                                                     |
| 856 Nitr | 7 | 97073633  | 50.59965001 | 5  | -0.003762497 | -114832 | '29.5.11.4.2' | grmzm2g030<br>341_t01 | 'protein.degradation.ubiq<br>uitin.E3.RING'                                                                            |
| 857 Nitr | 7 | 121206635 | 61.30136801 | 7  | 0.003846053  | -43231  | '11.9.4.5'    | grmzm2g133<br>836_t01 | 'lipid metabolism.lipid<br>degradation.beta-<br>oxidation.acyl-CoA<br>thioesterase'                                    |
| 858 Nitr | 7 | 145280969 | 83.18936747 | 6  | 0.000758506  | -2769   | '20.1'        | grmzm2g163<br>045_t01 | 'stress.biotic'                                                                                                        |

|          |   |           |             |    |              |                 |                       |                                                |
|----------|---|-----------|-------------|----|--------------|-----------------|-----------------------|------------------------------------------------|
| 859 Nitr | 7 | 152493835 | 91.25002624 | 19 | 0.000787893  | -209 '29.4'     | grmzm2g107<br>565_t02 | 'protein.postranslational<br>modification'     |
| 860 Nitr | 8 | 20733895  | 45.60822058 | 7  | 0.002081662  | -935 '29.4'     | grmzm2g080<br>588_t01 | 'protein.postranslational<br>modification'     |
| 861 Nitr | 8 | 139383376 | 71.29644034 | 13 | -0.004157906 | -7739 '16.2'    | grmzm2g407<br>949_t01 | 'secondary<br>metabolism.phenylpropa<br>noids' |
| 862 Nitr | 8 | 147013249 | 76.63825194 | 16 | 0.004700156  | -46421 '20.2.2' | grmzm2g114<br>538_t01 | 'stress.abiotic.cold'                          |
| 863 Nitr | 8 | 150840981 | 79.70937466 | 9  | 0.002809057  | -11088 '20.1'   | grmzm2g091<br>973_t01 | 'stress.biotic'                                |
| 864 Nitr | 8 | 160985585 | 90.37557478 | 10 | -0.000844257 | -38122 '27.4'   | grmzm2g042<br>118_t01 | 'RNA.RNA binding'                              |
| 865 Nitr | 9 | 23279446  | 40.13731735 | 8  | -0.000527851 | -31291 '15'     | grmzm2g171<br>376_t01 | 'metal handling'                               |
| 866 Nitr | 9 | 23407123  | 40.42055726 | 5  | -0.000732831 | -158968 '15'    | grmzm2g171<br>376_t01 | 'metal handling'                               |
| 867 Nitr | 9 | 25029010  | 42.41502107 | 13 | -0.000589684 | -9537 '20.1'    | grmzm2g030<br>051_t01 | 'stress.biotic'                                |

|          |    |           |             |    |              |                  |                       |                                                                                             |
|----------|----|-----------|-------------|----|--------------|------------------|-----------------------|---------------------------------------------------------------------------------------------|
| 868 Nitr | 9  | 121495902 | 60.17794088 | 5  | -0.000866371 | -145789 '20.1'   | grmzm2g174<br>286_t01 | 'stress.biotic'                                                                             |
| 869 Nitr | 9  | 151011382 | 109.2060086 | 64 | 0.003263514  | -11190 '27.3.44' | grmzm2g049<br>168_t01 | 'RNA.regulation of<br>transcription.Chromatin<br>Remodeling Factors'                        |
| 870 Nitr | 10 | 146509918 | 91.0233194  | 8  | 0.000766245  | -55566 '25.7'    | grmzm2g106<br>376_t01 | 'C1-metabolism.GTP<br>cyclohydrolase I'                                                     |
| 871 Nitr | 10 | 146628442 | 91.61626493 | 10 | 0.000710638  | -28101 '27.3.22' | grmzm2g028<br>622_t01 | 'RNA.regulation of<br>transcription.HB,Homeo<br>box transcription factor<br>family'         |
| 872 Nitr | 10 | 146744873 | 92.26893726 | 17 | 0.000679393  | -4101 '31.1'     | grmzm2g423<br>861_t01 | 'cell.organisation'                                                                         |
| 873 Nitr | 10 | 147132717 | 94.44305795 | 6  | 0.000722548  | -11231 '23.4.1'  | grmzm2g150<br>014_t01 | 'nucleotide<br>metabolism.phosphotran<br>sfer and<br>pyrophosphatases.adenyl<br>ate kinase' |
| 874 Nitr | 10 | 147981037 | 99.19844948 | 12 | 0.000848392  | -170 '27.3.8'    | grmzm2g142<br>718_t01 | 'RNA.regulation of<br>transcription.C2C2(Zn)<br>DOF zinc finger family'                     |
| 875 Nitr | 10 | 148513914 | 102.1855755 | 14 | 0.000913186  | -5570 '33.99'    | ac214046.4_f<br>gt005 | 'development.unspecifie<br>d'                                                               |

|          |   |           |             |    |              |                  |                       |                                                                                                                      |
|----------|---|-----------|-------------|----|--------------|------------------|-----------------------|----------------------------------------------------------------------------------------------------------------------|
| 876 Prot | 1 | 64910659  | 74.0301357  | 9  | -0.006095916 | -10535 '8.1.7'   | grmzm2g306<br>945_t01 | 'TCA / org.<br>transformation.TCA.succ<br>inate dehydrogenase'                                                       |
| 877 Prot | 1 | 64910976  | 74.03036785 | 33 | -0.006371905 | -10852 '8.1.7'   | grmzm2g306<br>945_t01 | 'TCA / org.<br>transformation.TCA.succ<br>inate dehydrogenase'                                                       |
| 878 Prot | 1 | 69196228  | 76.41372859 | 13 | -0.006630505 | -191670 '11.8.4' | grmzm2g149<br>224_t01 | 'lipid<br>metabolism."exotics"<br>(steroids, squalene etc).3-<br>beta hydroxysteroid<br>dehydrogenase/isomeras<br>e' |
| 879 Prot | 1 | 69271066  | 76.45177556 | 5  | -0.007173736 | -266508 '11.8.4' | grmzm2g149<br>224_t01 | 'lipid<br>metabolism."exotics"<br>(steroids, squalene etc).3-<br>beta hydroxysteroid<br>dehydrogenase/isomeras<br>e' |
| 880 Prot | 1 | 74985643  | 79.35701503 | 8  | -0.015969066 | -1889 '33.99'    | grmzm2g138<br>710_t01 | 'development.unspecific<br>d'                                                                                        |
| 881 Prot | 1 | 252882663 | 149.8292876 | 8  | 0.008583908  | -4271 '28.1'     | grmzm2g043<br>191_t01 | 'DNA.synthesis/chromati<br>n structure'                                                                              |
| 882 Prot | 2 | 20043374  | 50.80064207 | 26 | -0.006974803 | -357 '27.3.25'   | grmzm2g105<br>137_t01 | 'RNA.regulation of<br>transcription.MYB<br>domain transcription<br>factor family'                                    |

|          |   |           |              |    |              |                          |                       |                                                                                                         |
|----------|---|-----------|--------------|----|--------------|--------------------------|-----------------------|---------------------------------------------------------------------------------------------------------|
| 883 Prot | 2 | 185457136 | 96.16151574  | 6  | 0.006649714  | -2959 '27.3.35'          | grmzm2g137<br>532_t01 | 'RNA.regulation of<br>transcription.bZIP<br>transcription factor<br>family'                             |
| 884 Prot | 3 | 1187527   | -0.271888706 | 19 | 0.008814859  | -262839 '27.3.99'        | grmzm2g461<br>783_t01 | 'RNA.regulation of<br>transcription.unclassified<br>'                                                   |
| 885 Prot | 3 | 127883944 | 61.0242801   | 19 | -0.009978835 | -277970 '34.9'           | grmzm2g447<br>657_t01 | 'transport.metabolite<br>transporters at the<br>mitochondrial<br>membrane'                              |
| 886 Prot | 3 | 127884222 | 61.02430232  | 7  | -0.008779638 | -278248 '34.9'           | grmzm2g447<br>657_t01 | 'transport.metabolite<br>transporters at the<br>mitochondrial<br>membrane'                              |
| 887 Prot | 3 | 131786653 | 61.68464041  | 6  | -0.014158624 | -52957 '29.2.3'          | grmzm2g084<br>647_t01 | 'protein.synthesis.initiati<br>on'                                                                      |
| 888 Prot | 3 | 179931178 | 91.94664886  | 37 | -0.006464741 | -2144 '34.12'            | grmzm2g014<br>454_t01 | 'transport.metal'                                                                                       |
| 889 Prot | 3 | 186207858 | 97.81793168  | 13 | -0.009426898 | '29.5.11.<br>-28487 4.2' | ac213654.3_f<br>gt001 | 'protein.degradation.ubiq<br>uitin.E3.RING'                                                             |
| 890 Prot | 3 | 186596173 | 98.06048224  | 5  | -0.00757709  | -4373 '29.5'             | grmzm2g047<br>274_t01 | 'protein.degradation'                                                                                   |
| 891 Prot | 3 | 188565185 | 99.29037279  | 6  | -0.006679739 | -212935 '27.3.11'        | grmzm2g105<br>224_t01 | 'RNA.regulation of<br>transcription.C2H2 zinc<br>finger family'                                         |
| 892 Prot | 3 | 203411410 | 111.3198505  | 6  | -0.006026391 | '16.1.2.9<br>-49791 '    | grmzm2g098<br>569_t01 | 'secondary<br>metabolism.isoprenoids.<br>mevalonate<br>pathway.farnesyl<br>pyrophosphate<br>synthetase' |

|          |   |           |             |    |              |         |                                 |                                                                                |
|----------|---|-----------|-------------|----|--------------|---------|---------------------------------|--------------------------------------------------------------------------------|
| 893 Prot | 3 | 212222986 | 123.2720269 | 21 | -0.006839459 | -163129 | '13.1.4.1 grmzm2g004<br>382_t01 | 'amino acid<br>metabolism.synthesis.bra<br>nched chain<br>group.common'        |
| 894 Prot | 3 | 212224642 | 123.2740932 | 16 | -0.007350952 | -164785 | '13.1.4.1 grmzm2g004<br>382_t01 | 'amino acid<br>metabolism.synthesis.bra<br>nched chain<br>group.common'        |
| 895 Prot | 3 | 213226535 | 125.1288155 | 17 | -0.008878007 | -35293  | '27.3.12' grmzm2g157<br>927_t01 | 'RNA.regulation of<br>transcription.C3H zinc<br>finger family'                 |
| 896 Prot | 3 | 213800913 | 126.5396432 | 5  | -0.007297196 | -156736 | '29.4' grmzm2g088<br>299_t01    | 'protein.postranslational<br>modification'                                     |
| 897 Prot | 3 | 213854238 | 126.6706238 | 9  | -0.007474129 | -50380  | '26.2' grmzm2g048<br>010_t01    | 'misc.UDP glucosyl and<br>glucuronyl transferases'                             |
| 898 Prot | 3 | 217611213 | 133.5696863 | 6  | -0.008173794 | -136    | '27.3.6' grmzm2g081<br>816_t01  | 'RNA.regulation of<br>transcription.bHLH,Basi<br>c Helix-Loop-Helix<br>family' |
| 899 Prot | 4 | 168096468 | 76.74550042 | 5  | -0.013008569 | -14831  | '29.2.3' grmzm2g018<br>947_t01  | 'protein.synthesis.initiati<br>on'                                             |
| 900 Prot | 4 | 227245511 | 112.6233194 | 44 | 0.009730652  | -112863 | '29.4' grmzm2g147<br>026_t01    | 'protein.postranslational<br>modification'                                     |

|          |   |           |             |    |              |                   |                       |                                                                           |
|----------|---|-----------|-------------|----|--------------|-------------------|-----------------------|---------------------------------------------------------------------------|
| 901 Prot | 4 | 230742777 | 113.8187579 | 6  | 0.008891322  | -48645 '29.4'     | grmzm2g073<br>788_t01 | 'protein.postranslational<br>modification'                                |
| 902 Prot | 5 | 88557383  | 69.4927261  | 74 | -0.007848454 | -116887 '16.2.1.3 | grmzm2g075<br>333_t01 | 'secondary<br>metabolism.phenylpropa<br>noids.lignin<br>biosynthesis.4CL' |
| 903 Prot | 5 | 91037740  | 69.69522773 | 20 | -0.006780225 | -139582 '27.4'    | grmzm2g174<br>785_t01 | 'RNA.RNA binding'                                                         |
| 904 Prot | 5 | 186016180 | 95.57664385 | 5  | -0.00735679  | -2254 '34'        | grmzm2g068<br>714_t01 | 'transport'                                                               |
| 905 Prot | 5 | 187955512 | 97.81042264 | 8  | -0.005429395 | -411 '21.1'       | grmzm2g139<br>803_t01 | 'redox.thioredoxin'                                                       |
| 906 Prot | 5 | 189228254 | 98.86708725 | 21 | -0.007553606 | -23431 '33.99'    | grmzm2g409<br>358_t01 | 'development.unspecifie<br>d'                                             |
| 907 Prot | 5 | 203170982 | 112.0815943 | 20 | -0.006893258 | -17977 '28.99'    | grmzm2g018<br>126_t01 | 'DNA.unspecified'                                                         |



|          |   |           |             |    |              |                            |                       |                                                                                         |
|----------|---|-----------|-------------|----|--------------|----------------------------|-----------------------|-----------------------------------------------------------------------------------------|
| 908 Prot | 5 | 205646722 | 119.7979212 | 18 | -0.005971484 | -92306 '29.4'              | grmzm2g127<br>632_t01 | 'protein.postranslational<br>modification'                                              |
| 909 Prot | 5 | 206043601 | 121.085272  | 6  | -0.006353574 | '29.5.11.<br>-56780 4.3.3' | grmzm2g380<br>184_t01 | 'protein.degradation.ubiq<br>uitin.E3.SCF.cullin'                                       |
| 910 Prot | 5 | 208092874 | 126.5365424 | 6  | -0.005967461 | -5948 '26.19'              | grmzm2g045<br>927_t01 | 'misc.plastocyanin-like'                                                                |
| 911 Prot | 6 | 22422464  | 7.104655221 | 26 | -0.006334214 | -86390 '4.1.16'            | grmzm2g395<br>569_t01 | 'glycolysis.cytosolic<br>branch.phospho-enol-<br>pyruvate carboxylase<br>kinase (PPCK)' |
| 912 Prot | 6 | 35896471  | 8.2773635   | 5  | -0.005965884 | -23383 '29.4'              | grmzm2g456<br>423_t01 | 'protein.postranslational<br>modification'                                              |
| 913 Prot | 6 | 72931425  | 10.26780431 | 14 | -0.004869067 | -71749 '16.2'              | grmzm2g362<br>298_t01 | 'secondary<br>metabolism.phenylpropa<br>noids'                                          |
| 914 Prot | 6 | 72985636  | 10.2733065  | 9  | -0.004940372 | -125960 '16.2'             | grmzm2g362<br>298_t01 | 'secondary<br>metabolism.phenylpropa<br>noids'                                          |
| 915 Prot | 6 | 73021951  | 10.27699232 | 13 | -0.0080408   | -36020 '27.1.19'           | grmzm2g047<br>265_t01 | 'RNA.processing.ribonuc<br>leases'                                                      |
| 916 Prot | 6 | 168683648 | 108.6048676 | 13 | 0.011314553  | -19134 '27.3.55'           | grmzm2g367<br>886_t01 | 'RNA.regulation of<br>transcription.HDA'                                                |
| 917 Prot | 6 | 168748906 | 108.622076  | 35 | 0.007222797  | -65074 '34.9'              | grmzm2g067<br>877_t01 | 'transport.metabolite<br>transporters at the<br>mitochondrial<br>membrane'              |

|          |   |           |             |    |              |                  |                       |                                                                                        |
|----------|---|-----------|-------------|----|--------------|------------------|-----------------------|----------------------------------------------------------------------------------------|
| 918 Prot | 7 | 5099065   | 21.78417429 | 9  | -0.008417978 | -17896 '31.1'    | grmzm2g093<br>766_t01 | 'cell.organisation'                                                                    |
| 919 Prot | 7 | 33595519  | 47.99555999 | 10 | 0.00514782   | -13476 '20.1'    | grmzm2g160<br>265_t01 | 'stress.biotic'                                                                        |
| 920 Prot | 7 | 154247787 | 94.54909037 | 7  | 0.005825457  | -2282 '30.7'     | grmzm2g305<br>211_t01 | 'signalling.14-3-3<br>proteins'                                                        |
| 921 Prot | 7 | 157249277 | 100.7051801 | 14 | 0.006706373  | -45332 '29.5.3'  | grmzm2g049<br>882_t01 | 'protein.degradation.cyst<br>eine protease'                                            |
| 922 Prot | 7 | 158036207 | 102.3366246 | 5  | 0.005791282  | -1527 '26.4'     | grmzm2g131<br>262_t02 | 'misc.beta 1,3 glucan<br>hydrolases'                                                   |
| 923 Prot | 7 | 159778542 | 106.10253   | 6  | 0.012461708  | -77328 '29.2.4'  | grmzm2g031<br>545_t01 | 'protein.synthesis.elongat<br>ion'                                                     |
| 924 Prot | 7 | 168378312 | 131.3238192 | 8  | -0.007477326 | -39666 '27.1'    | grmzm2g470<br>461_t01 | 'RNA.processing'                                                                       |
| 925 Prot | 8 | 21881574  | 47.44607971 | 10 | 0.011659826  | -15911 '27.3.62' | grmzm2g032<br>252_t01 | 'RNA.regulation of<br>transcription.Nucleosom<br>e/chromatin assembly<br>factor group' |
| 926 Prot | 8 | 108880988 | 60.59133569 | 5  | 0.008562491  | -31108 '30.5'    | grmzm2g072<br>089_t01 | 'signalling.G-proteins'                                                                |

|          |   |           |             |    |              |                  |                       |                                                                          |
|----------|---|-----------|-------------|----|--------------|------------------|-----------------------|--------------------------------------------------------------------------|
| 927 Prot | 8 | 115683038 | 62.57820324 | 5  | 0.008392785  | -196269 '29.4'   | grmzm2g035<br>202_t01 | 'protein.postranslational<br>modification'                               |
| 928 Prot | 8 | 117977083 | 63.86243699 | 51 | 0.01116072   | -99957 '34.12'   | grmzm2g138<br>817_t01 | 'transport.metal'                                                        |
| 929 Prot | 8 | 129392376 | 68.26348656 | 8  | 0.009582417  | -7407 '29.3.3'   | grmzm2g034<br>043_t01 | 'protein.targeting.chlorop<br>last'                                      |
| 930 Prot | 8 | 131868393 | 69.1089486  | 5  | -0.007281874 | -2333 '21.2.1'   | grmzm2g005<br>710_t01 | 'redox.ascorbate and<br>glutathione.ascorbate'                           |
| 931 Prot | 8 | 161242940 | 90.87698678 | 53 | -0.005415146 | -200 '31.3.1'    | grmzm2g031<br>204_t01 | 'cell.cycle.peptidylprolyl<br>isomerase'                                 |
| 932 Prot | 8 | 170967906 | 124.4926125 | 15 | -0.010060425 | -20762 '29.5.7'  | grmzm2g133<br>249_t01 | 'protein.degradation.met<br>alloprotease'                                |
| 933 Prot | 9 | 73386482  | 45.90639706 | 5  | -0.006073526 | -134278 '30.5'   | grmzm2g018<br>619_t01 | 'signalling.G-proteins'<br>'RNA.regulation of<br>transcription.bHLH,Basi |
| 934 Prot | 9 | 75752943  | 46.01866137 | 10 | -0.00678119  | -187366 '27.3.6' | grmzm2g340<br>177_t01 | c Helix-Loop-Helix<br>family'                                            |

|          |   |           |             |    |              |                       |                       |                                                                                                                      |
|----------|---|-----------|-------------|----|--------------|-----------------------|-----------------------|----------------------------------------------------------------------------------------------------------------------|
| 935 Prot | 9 | 86122013  | 46.66594904 | 22 | -0.007718805 | -47007 '19.21'        | grmzm2g157<br>936_t01 | 'tetrapyrrole<br>synthesis.heme<br>oxygenase'                                                                        |
| 936 Prot | 9 | 98709960  | 49.58225494 | 8  | -0.00680033  | -342523 '34.99'       | grmzm2g143<br>377_t01 | 'transport.misc'                                                                                                     |
| 937 Prot | 9 | 112772173 | 55.72841749 | 8  | -0.006998869 | -71289 '10.7'         | grmzm2g013<br>671_t01 | 'cell wall.modification'                                                                                             |
| 938 Prot | 9 | 113322955 | 55.98017627 | 24 | -0.006456001 | -76302 '31.2'         | ac191253.3_f<br>gt004 | 'cell.division'                                                                                                      |
| 939 Prot | 9 | 113731726 | 56.16702277 | 6  | -0.00865215  | '13.2.2.2<br>-436 '   | grmzm2g117<br>956_t01 | 'amino acid<br>metabolism.degradation.<br>glutamate family.proline'                                                  |
| 940 Prot | 9 | 120621679 | 59.56922799 | 5  | -0.00678539  | '17.7.1.4<br>-42612 ' | grmzm2g415<br>793_t01 | 'hormone<br>metabolism.jasmonate.sy<br>nthesis-<br>degradation.allene<br>oxidase cyclase'                            |
| 941 Prot | 9 | 122100192 | 60.59870208 | 5  | -0.007751436 | -108399 '29.4'        | grmzm2g108<br>309_t01 | 'protein.postranslational<br>modification'                                                                           |
| 942 Prot | 9 | 143538206 | 90.82527553 | 10 | -0.007521104 | -74129 '34.2'         | grmzm2g137<br>985_t01 | 'transport.sugars'<br>'misc.protease<br>inhibitor/seed<br>storage/lipid transfer<br>protein (LTP) family<br>protein' |
| 943 Prot | 9 | 144829091 | 93.82411792 | 25 | -0.004785192 | -22827 '26.21'        | grmzm2g004<br>466_t01 |                                                                                                                      |

|          |    |           |             |    |              |                        |                       |                                                                                                |
|----------|----|-----------|-------------|----|--------------|------------------------|-----------------------|------------------------------------------------------------------------------------------------|
| 944 Prot | 10 | 10440954  | 28.50645685 | 9  | -0.008130968 | '29.4.1.5<br>-59914 6' | grmzm2g418<br>432_t01 | 'protein.postranslational<br>modification.kinase.rece<br>ptor like cytoplasmatic<br>kinase VI' |
| 945 Prot | 10 | 16919807  | 33.52470383 | 16 | 0.007567347  | -208844 '20.2.1'       | grmzm2g130<br>127_t01 | 'stress.abiotic.heat'                                                                          |
| 946 Prot | 10 | 147427851 | 96.09747813 | 13 | 0.004748578  | -1150 '9.99'           | grmzm2g092<br>365_t03 | 'mitochondrial electron<br>transport / ATP<br>synthesis.unspecified'                           |
| 947 Prot | 10 | 148213790 | 100.5031831 | 11 | 0.006813955  | -1597 '34.15'          | grmzm2g039<br>797_t01 | 'transport.potassium'                                                                          |
| 948 Prot | 10 | 148344527 | 101.23605   | 45 | 0.008225195  | -44946 '27.3.25'       | grmzm2g478<br>807_t01 | 'RNA.regulation of<br>transcription.MYB<br>domain transcription<br>factor family'              |
| 949 Prot | 10 | 148496242 | 102.0865123 | 5  | 0.007112842  | -6170 '29.4'           | grmzm2g104<br>658_t01 | 'protein.postranslational<br>modification'                                                     |
| 950 Star | 1  | 7457814   | 13.94852432 | 86 | -0.037258586 | -4402 '27.3.27'        | grmzm2g059<br>428_t01 | 'RNA.regulation of<br>transcription.NAC<br>domain transcription<br>factor family'              |
| 951 Star | 1  | 17278764  | 33.6621462  | 5  | -0.041877285 | -83731 '30.4'          | grmzm2g097<br>434_t01 | 'signalling.phosphinositi<br>des'                                                              |
| 952 Star | 1  | 21382731  | 37.73085137 | 29 | -0.023301274 | -196302 '10.1'         | grmzm2g064<br>841_t01 | 'cell wall.precursor<br>synthesis'                                                             |

|     |      |   |          |             |    |              |         |                            |                       |                                                                                                  |
|-----|------|---|----------|-------------|----|--------------|---------|----------------------------|-----------------------|--------------------------------------------------------------------------------------------------|
| 953 | Star | 1 | 21383024 | 37.73112289 | 10 | -0.022620507 | -196595 | '10.1'                     | grmzm2g064<br>841_t01 | 'cell wall.precursor<br>synthesis'                                                               |
| 954 | Star | 1 | 42174991 | 59.32632563 | 11 | 0.051194392  | -45014  | '13.1.2.3<br>.2'           | grmzm2g044<br>237_t01 | 'amino acid<br>metabolism.synthesis.glu<br>tamate<br>family.arginine.acetylglu<br>tamate kinase' |
| 955 | Star | 1 | 45528222 | 61.4993069  | 7  | 0.044795124  | -248164 | '13.1.3.1<br>'             | grmzm2g053<br>669_t01 | 'amino acid<br>metabolism.synthesis.asp<br>artate family.asparagine'                             |
| 956 | Star | 1 | 46715564 | 62.60388883 | 8  | 0.035909602  | -2482   | '31.1'                     | grmzm2g104<br>534_t01 | 'cell.organisation'                                                                              |
| 957 | Star | 1 | 51113147 | 65.50551539 | 54 | 0.052957455  | -300304 | '33.99'                    | ac208571.4_f<br>gt001 | 'development.unspecifie<br>d'                                                                    |
| 958 | Star | 1 | 51531509 | 66.02023986 | 6  | 0.089385584  | -15801  | '27.3.25'                  | grmzm2g070<br>849_t01 | 'RNA.regulation of<br>transcription.MYB<br>domain transcription<br>factor family'                |
| 959 | Star | 1 | 92753447 | 85.57176721 | 62 | 0.024022074  | -99005  | '29.2.1.9<br>9.2.1185<br>' | grmzm2g154<br>487_t01 | 'protein.synthesis.riboso<br>mal<br>protein.unknown.large<br>subunit.L18/L5'                     |
| 960 | Star | 1 | 93661572 | 85.98563614 | 7  | 0.024453663  | -282429 | '27.3.9'                   | grmzm2g113<br>098_t01 | 'RNA.regulation of<br>transcription.C2C2(Zn)<br>GATA transcription<br>factor family'             |
| 961 | Star | 1 | 93667548 | 85.98835964 | 6  | 0.024126069  | -288405 | '27.3.9'                   | grmzm2g113<br>098_t01 | 'RNA.regulation of<br>transcription.C2C2(Zn)<br>GATA transcription<br>factor family'             |

|     |      |   |           |             |    |              |         |                 |                       |                                                                                                 |
|-----|------|---|-----------|-------------|----|--------------|---------|-----------------|-----------------------|-------------------------------------------------------------------------------------------------|
| 962 | Star | 1 | 251149118 | 148.8823369 | 5  | -0.048533652 | -18812  | '30.2.25'       | grmzm2g103<br>610_t01 | 'signalling.receptor<br>kinases.wall associated<br>kinase'                                      |
| 963 | Star | 1 | 251176189 | 148.8964086 | 90 | -0.057655015 | -2474   | '20.1'          | grmzm2g081<br>099_t01 | 'stress.biotic'                                                                                 |
| 964 | Star | 1 | 292560966 | 192.501744  | 10 | -0.071069046 | -158    | '29.4.1.5<br>7' | grmzm2g068<br>117_t01 | 'protein.postranslational<br>modification.kinase.rece<br>ptor like cytoplasmatic<br>kinase VII' |
| 965 | Star | 2 | 5548326   | 16.71276385 | 15 | -0.027020805 | -28052  | '33.99'         | grmzm2g174<br>784_t01 | 'development.unspecifie<br>d'                                                                   |
| 966 | Star | 2 | 5548414   | 16.71309841 | 83 | -0.028470515 | -28140  | '33.99'         | grmzm2g174<br>784_t01 | 'development.unspecifie<br>d'                                                                   |
| 967 | Star | 2 | 21795122  | 52.9770168  | 8  | -0.021390127 | -50745  | '30.2.99'       | grmzm2g168<br>917_t01 | 'signalling.receptor<br>kinases.misc'                                                           |
| 968 | Star | 2 | 22808083  | 54.70986501 | 76 | -0.029176947 | -125949 | '27.3.10'       | grmzm2g054<br>795_t01 | 'RNA.regulation of<br>transcription.C2C2(Zn)<br>YABBY family'                                   |
| 969 | Star | 2 | 27790884  | 58.80007957 | 13 | -0.032182719 | -36209  | '31.1'          | grmzm2g387<br>389_t01 | 'cell.organisation'                                                                             |
| 970 | Star | 2 | 28788480  | 60.39948962 | 5  | -0.024239309 | -189580 | '27.3.67'       | grmzm2g052<br>688_t01 | 'RNA.regulation of<br>transcription.putative<br>transcription regulator'                        |

|          |   |           |             |    |              |                   |                       |                                                                                                   |
|----------|---|-----------|-------------|----|--------------|-------------------|-----------------------|---------------------------------------------------------------------------------------------------|
| 971 Star | 2 | 28788620  | 60.39963767 | 12 | -0.023889437 | -189720 '27.3.67' | grmzm2g052<br>688_t01 | 'RNA.regulation of<br>transcription.putative<br>transcription regulator'                          |
| 972 Star | 2 | 28960635  | 60.58154184 | 5  | -0.030823242 | -102237 '29.4'    | grmzm2g032<br>694_t01 | 'protein.postranslational<br>modification'                                                        |
| 973 Star | 2 | 28970761  | 60.59224999 | 8  | -0.031083803 | -112363 '29.4'    | grmzm2g032<br>694_t01 | 'protein.postranslational<br>modification'                                                        |
| 974 Star | 2 | 28972476  | 60.59406358 | 35 | -0.02957084  | -114078 '29.4'    | grmzm2g032<br>694_t01 | 'protein.postranslational<br>modification'                                                        |
| 975 Star | 2 | 107216168 | 76.50296846 | 7  | -0.030529227 | -233414 '28.99'   | grmzm2g053<br>631_t01 | 'DNA.unspecified'<br>'hormone<br>metabolism.auxin.induce<br>d-regulated-responsive-<br>activated' |
| 976 Star | 2 | 194191603 | 105.3998294 | 6  | -0.020841194 | -199 '17.2.3'     | grmzm2g156<br>470_t01 |                                                                                                   |
| 977 Star | 2 | 201217096 | 109.0293094 | 10 | -0.026005633 | -56497 '30.2.17'  | grmzm2g087<br>625_t01 | 'signalling.receptor<br>kinases.DUF 26'                                                           |
| 978 Star | 2 | 203650489 | 111.7689321 | 15 | -0.025557901 | -37827 '26.10'    | grmzm2g031<br>909_t01 | 'misc.cytochrome P450'                                                                            |
| 979 Star | 2 | 205289573 | 113.7617273 | 5  | -0.031413614 | -87624 '9.1.2'    | grmzm2g105<br>207_t01 | 'mitochondrial electron<br>transport / ATP<br>synthesis.NADH-<br>DH.localisation not<br>clear'    |



|     |      |   |           |             |    |              |         |                  |                       |                                                                                                    |
|-----|------|---|-----------|-------------|----|--------------|---------|------------------|-----------------------|----------------------------------------------------------------------------------------------------|
| 980 | Star | 2 | 205289574 | 113.7617285 | 9  | -0.027499236 | -87625  | '9.1.2'          | grmzm2g105<br>207_t01 | 'mitochondrial electron transport / ATP synthesis.NADH-DH.localisation not clear'                  |
| 981 | Star | 2 | 214729037 | 127.4005253 | 5  | -0.017802912 | -44435  | '29.5.11.4.2'    | grmzm2g402<br>262_t01 | 'protein.degradation.ubiquitin.E3.RING'                                                            |
| 982 | Star | 2 | 215881188 | 128.7144115 | 7  | -0.017742045 | -49386  | '27.3.21'        | grmzm2g425<br>366_t01 | 'RNA.regulation of transcription.GRAS transcription factor family'                                 |
| 983 | Star | 2 | 217125385 | 130.3224898 | 5  | -0.027701512 | -7716   | '10.8.1'         | grmzm2g158<br>240_t01 | 'cell wall.pectin*esterases.PME'                                                                   |
| 984 | Star | 2 | 217810072 | 131.5466232 | 5  | -0.0237361   | -18399  | '7.1.2'          | grmzm2g148<br>769_t01 | 'OPP.oxidative PP-6-phosphogluconolactonase'                                                       |
| 985 | Star | 3 | 3123500   | 9.745986067 | 7  | 0.038612596  | -146144 | '29.2.1.1.3.1.6' | grmzm2g026<br>868_t01 | 'protein.synthesis.ribosomal protein.prokaryotic.unknown organellar.30S subunit.S6'                |
| 986 | Star | 3 | 3780999   | 13.14827662 | 22 | 0.028169623  | -213    | '26.10'          | ac233853.1_f<br>gt003 | 'misc.cytochrome P450'                                                                             |
| 987 | Star | 3 | 3836355   | 13.43472146 | 17 | 0.031403613  | -40506  | '34.15'          | grmzm2g093<br>313_t01 | 'transport.potassium'<br>'RNA.regulation of transcription.MYB-related transcription factor family' |
| 988 | Star | 3 | 14416721  | 41.56032683 | 5  | -0.028022937 | -186199 | '27.3.26'        | grmzm2g163<br>291_t01 | 'RNA.regulation of transcription.MYB-related transcription factor family'                          |

|          |   |           |             |    |              |                  |                       |                                                                                   |
|----------|---|-----------|-------------|----|--------------|------------------|-----------------------|-----------------------------------------------------------------------------------|
| 989 Star | 3 | 17306447  | 45.29685092 | 89 | -0.032281971 | -2219 '16.7'     | grmzm2g541<br>193_t01 | 'secondary<br>metabolism.wax'                                                     |
| 990 Star | 3 | 51981075  | 56.79858368 | 90 | 0.084784527  | -12830 '27.3.25' | grmzm2g158<br>700_t01 | 'RNA.regulation of<br>transcription.MYB<br>domain transcription<br>factor family' |
| 991 Star | 3 | 170725018 | 81.65819468 | 5  | -0.07741098  | -658 '30.2.11'   | grmzm2g167<br>253_t01 | 'signalling.receptor<br>kinases.leucine rich<br>repeat XI'                        |
| 992 Star | 3 | 178840635 | 90.20644881 | 8  | 0.036888541  | -27653 '27.3.99' | grmzm2g013<br>463_t01 | 'RNA.regulation of<br>transcription.unclassified<br>'                             |
| 993 Star | 3 | 192649685 | 100.9866632 | 10 | -0.050036116 | -69958 '26.1'    | grmzm2g089<br>944_t01 | 'misc.misc2'                                                                      |
| 994 Star | 3 | 192874331 | 101.0880183 | 8  | -0.042136484 | -15848 '26.19'   | grmzm2g128<br>531_t01 | 'misc.plastocyanin-like'                                                          |
| 995 Star | 3 | 192949443 | 101.1219071 | 9  | -0.0571714   | -90960 '26.19'   | grmzm2g128<br>531_t01 | 'misc.plastocyanin-like'                                                          |
| 996 Star | 3 | 193619852 | 101.4802146 | 6  | -0.049654665 | -251 '31.1'      | grmzm2g016<br>435_t01 | 'cell.organisation'                                                               |
| 997 Star | 3 | 193620690 | 101.4814585 | 27 | -0.053595039 | -1089 '31.1'     | grmzm2g016<br>435_t01 | 'cell.organisation'                                                               |

|      |      |   |           |             |    |              |         |                 |                       |                                                                                         |
|------|------|---|-----------|-------------|----|--------------|---------|-----------------|-----------------------|-----------------------------------------------------------------------------------------|
| 998  | Star | 3 | 194144683 | 102.2592936 | 5  | -0.038147905 | -25644  | '11.3.3'        | grmzm2g452<br>529_t01 | 'lipid<br>metabolism.Phospholipi<br>d<br>synthesis.phosphatidate<br>cytidyltransferase' |
| 999  | Star | 4 | 24269222  | 47.52251807 | 66 | 0.054432733  | -301899 | '17.5.2'        | ac213666.3_f<br>gt003 | 'hormone<br>metabolism.ethylene.sig<br>nal transduction'                                |
| 1000 | Star | 4 | 26928416  | 48.65692848 | 6  | 0.054001982  | -51005  | '29.5.11.4.3.2' | grmzm2g142<br>043_t03 | 'protein.degradation.ubiq<br>uitin.E3.SCF.FBOX'                                         |
| 1001 | Star | 4 | 63204562  | 55.58951138 | 5  | -0.024189406 | -104473 | '27.3.49'       | grmzm2g423<br>292_t01 | 'RNA.regulation of<br>transcription.GeBP like'                                          |
| 1002 | Star | 4 | 116242442 | 58.15932573 | 10 | -0.026678988 | -19827  | '29.5.11.4.3.2' | grmzm2g423<br>663_t01 | 'protein.degradation.ubiq<br>uitin.E3.SCF.FBOX'                                         |
| 1003 | Star | 4 | 194884222 | 103.0017383 | 8  | -0.034945398 | -20864  | '29.5.11.4.2'   | grmzm2g055<br>643_t01 | 'protein.degradation.ubiq<br>uitin.E3.RING'                                             |
| 1004 | Star | 4 | 194952409 | 103.053073  | 8  | -0.027789043 | -184    | '29.5.11.4.3.2' | grmzm2g302<br>499_t01 | 'protein.degradation.ubiq<br>uitin.E3.SCF.FBOX'                                         |
| 1005 | Star | 4 | 240714112 | 124.303751  | 25 | -0.017633483 | -201933 | '28.2'          | grmzm2g143<br>462_t01 | 'DNA.repair'                                                                            |
| 1006 | Star | 4 | 245062382 | 140.1088204 | 5  | -0.026856027 | -3818   | '30.6'          | grmzm2g374<br>088_t01 | 'signalling.MAP kinases'                                                                |
| 1007 | Star | 4 | 245730715 | 144.0453722 | 15 | -0.017329439 | -54846  | '20.2.1'        | grmzm2g415<br>007_t01 | 'stress.abiotic.heat'                                                                   |

|           |   |           |             |    |              |        |                    |                       |                                                                                          |
|-----------|---|-----------|-------------|----|--------------|--------|--------------------|-----------------------|------------------------------------------------------------------------------------------|
| 1008 Star | 4 | 245730944 | 144.0467211 | 11 | -0.017442961 | -55075 | '20.2.1'           | grmzm2g415<br>007_t01 | 'stress.abiotic.heat'                                                                    |
| 1009 Star | 4 | 245787531 | 144.3800244 | 15 | -0.026106421 | -48044 | '21.6'             | grmzm2g079<br>348_t03 | 'redox.dismutases and<br>catalases'                                                      |
| 1010 Star | 4 | 246077836 | 146.0899515 | 5  | -0.021761826 | -6829  | '2.2.1.3.<br>3'    | grmzm2g463<br>871_t01 | 'major CHO<br>metabolism.degradation.<br>sucrose.invertases.vacuol<br>ar'                |
| 1011 Star | 5 | 1529458   | 1.89866854  | 11 | -0.026956905 | -34161 | '29.2.1.2<br>.1.4' | grmzm2g125<br>271_t01 | 'protein.synthesis.riboso<br>mal<br>protein.eukaryotic.40S<br>subunit.S4'                |
| 1012 Star | 5 | 1532216   | 1.906091195 | 16 | -0.020171388 | -36919 | '29.2.1.2<br>.1.4' | grmzm2g125<br>271_t01 | 'protein.synthesis.riboso<br>mal<br>protein.eukaryotic.40S<br>subunit.S4'                |
| 1013 Star | 5 | 1735588   | 2.453429899 | 6  | -0.019083198 | -4347  | '11.9.2.1<br>'     | grmzm2g023<br>049_t01 | 'lipid metabolism.lipid<br>degradation.lipases.triac<br>ylglycerol lipase'               |
| 1014 Star | 5 | 1879182   | 2.839887002 | 5  | -0.025793792 | -22687 | '27.3.28'          | grmzm2g138<br>421_t01 | 'RNA.regulation of<br>transcription.SBP,Squam<br>osa promoter binding<br>protein family' |
| 1015 Star | 5 | 20941271  | 51.30637712 | 10 | -0.050307121 | -60679 | '27.3.67'          | grmzm2g024<br>054_t01 | 'RNA.regulation of<br>transcription.putative<br>transcription regulator'                 |
| 1016 Star | 5 | 75996032  | 67.01800088 | 5  | 0.071648285  | -864   | '30.1.1'           | grmzm2g042<br>245_t01 | 'signalling.in sugar and<br>nutrient physiology'                                         |

|      |      |   |           |             |    |              |         |                 |                       |                                                                                                 |
|------|------|---|-----------|-------------|----|--------------|---------|-----------------|-----------------------|-------------------------------------------------------------------------------------------------|
| 1017 | Star | 5 | 96165401  | 69.92179085 | 29 | 0.054394768  | -131262 | '29.4.1.5<br>7' | grmzm2g118<br>939_t01 | 'protein.postranslational<br>modification.kinase.rece<br>ptor like cytoplasmatic<br>kinase VII' |
| 1018 | Star | 5 | 145308951 | 72.52912618 | 15 | -0.06568065  | -187340 | '29.4'          | grmzm2g151<br>916_t01 | 'protein.postranslational<br>modification'                                                      |
| 1019 | Star | 5 | 168868583 | 80.63961419 | 67 | -0.073140188 | -218438 | '21.3'          | grmzm2g074<br>040_t01 | 'redox.heme'                                                                                    |
| 1020 | Star | 5 | 171396511 | 83.30241817 | 34 | 0.023072258  | -218132 | '21.1'          | grmzm2g007<br>385_t01 | 'redox.thioredoxin'                                                                             |
| 1021 | Star | 5 | 174165684 | 85.75501381 | 25 | 0.029476756  | -44515  | '31.3'          | ac212449.4_f<br>gt004 | 'cell.cycle'                                                                                    |
| 1022 | Star | 5 | 174821506 | 86.48707371 | 5  | 0.027732203  | -2537   | '26.2'          | grmzm2g049<br>798_t01 | 'misc.UDP glucosyl and<br>glucuronyl transferases'                                              |
| 1023 | Star | 5 | 193444292 | 102.0960523 | 28 | 0.019728235  | -49778  | '27.3.99'       | grmzm2g141<br>503_t01 | 'RNA.regulation of<br>transcription.unclassified<br>'                                           |

|      |      |   |           |             |    |              |         |                       |                       |                                                                                                                        |
|------|------|---|-----------|-------------|----|--------------|---------|-----------------------|-----------------------|------------------------------------------------------------------------------------------------------------------------|
| 1024 | Star | 5 | 195201674 | 103.5571638 | 6  | 0.019382462  | -199033 | '27.3.3'              | grmzm2g137<br>341_t01 | 'RNA.regulation of<br>transcription.AP2/EREB<br>P, APETALA2/Ethylene-<br>responsive element<br>binding protein family' |
| 1025 | Star | 5 | 203772980 | 114.279637  | 34 | 0.032389813  | -45129  | '20.1'                | grmzm2g019<br>317_t02 | 'stress.biotic'                                                                                                        |
| 1026 | Star | 5 | 204520039 | 116.1433154 | 8  | 0.021779461  | -890    | '17.4.2'              | grmzm2g151<br>223_t02 | 'hormone<br>metabolism.cytokinin.sig<br>nal transduction'                                                              |
| 1027 | Star | 5 | 205480420 | 119.2584897 | 23 | 0.024091119  | -6420   | '29.5.11.<br>4.2'     | grmzm2g053<br>303_t01 | 'protein.degradation.ubiq<br>uitin.E3.RING'                                                                            |
| 1028 | Star | 5 | 207749910 | 125.7434999 | 9  | 0.032228364  | -137681 | '29.2.1.1<br>.1.2.29' | grmzm2g159<br>554_t01 | 'protein.prokaryotic.chlor<br>oplast.50S subunit.L29'                                                                  |
| 1029 | Star | 6 | 25145461  | 7.801186431 | 11 | -0.069037952 | -21579  | '23.4.99'             | grmzm2g137<br>930_t01 | 'nucleotide<br>metabolism.phosphotran<br>sfer and<br>pyrophosphatases.misc'                                            |
| 1030 | Star | 6 | 118288607 | 43.43874583 | 32 | -0.072025188 | -66879  | '10.6.1'              | grmzm2g455<br>642_t01 | 'cell<br>wall.degradation.cellulas<br>es and beta -1,4-<br>glucanases'                                                 |
| 1031 | Star | 6 | 119252741 | 43.97152587 | 16 | -0.049737056 | -47860  | '31.1'                | grmzm2g018<br>823_t01 | 'cell.organisation'                                                                                                    |
| 1032 | Star | 6 | 156368499 | 74.39513977 | 7  | 0.053819036  | -5054   | '30.3'                | grmzm2g305<br>159_t01 | 'signalling.calcium'                                                                                                   |

|      |      |   |           |             |    |              |         |           |                                 |                                                                                                 |
|------|------|---|-----------|-------------|----|--------------|---------|-----------|---------------------------------|-------------------------------------------------------------------------------------------------|
| 1033 | Star | 6 | 166337059 | 105.4357129 | 22 | -0.05306977  | -2598   | '27.3.26' | grmzm2g139<br>174_t01           | 'RNA.regulation of transcription.MYB-related transcription factor family'                       |
| 1034 | Star | 6 | 166977847 | 107.6073304 | 44 | -0.037821131 | -52799  | 0'        | '16.1.1.1 grmzm2g163<br>809_t01 | 'secondary metabolism.isoprenoids.non-mevalonate pathway.geranylgeranyl pyrophosphate synthase' |
| 1035 | Star | 7 | 18458794  | 44.19878603 | 5  | -0.027460741 | -104907 | .1.2'     | '29.2.1.2 grmzm2g168<br>149_t01 | 'protein.synthesis.ribosomal protein.eukaryotic.40S subunit.S2'                                 |
| 1036 | Star | 7 | 20248668  | 44.70548997 | 38 | -0.042578673 | -9314   | '27.3.69' | ac233961.1_f<br>gt001           | 'RNA.regulation of transcription.SET-domain transcriptional regulator family'                   |
| 1037 | Star | 7 | 20380953  | 44.78804553 | 7  | -0.06171405  | -141599 | '27.3.69' | ac233961.1_f<br>gt001           | 'RNA.regulation of transcription.SET-domain transcriptional regulator family'                   |
| 1038 | Star | 7 | 21623347  | 45.56339066 | 5  | -0.02739467  | -85142  | '34.3'    | grmzm2g173<br>967_t01           | 'transport.amino acids'                                                                         |
| 1039 | Star | 7 | 25948068  | 46.52566875 | 5  | -0.043273669 | -115635 | '29.4'    | grmzm2g050<br>427_t01           | 'protein.postranslational modification'                                                         |
| 1040 | Star | 7 | 29953895  | 47.26241735 | 12 | -0.028721815 | -84710  | '26.24'   | grmzm2g302<br>778_t01           | 'misc.GCN5-related N-acetyltransferase'                                                         |

|      |      |   |           |             |    |              |        |                      |                       |                                                                                                                                                    |
|------|------|---|-----------|-------------|----|--------------|--------|----------------------|-----------------------|----------------------------------------------------------------------------------------------------------------------------------------------------|
| 1041 | Star | 7 | 126449302 | 67.30732758 | 10 | -0.021768781 | -21546 | '13.1.7.2<br>862_t01 | grmzm2g068<br>862_t01 | 'amino acid<br>metabolism.synthesis.his<br>tidine.bifunctional<br>phosphoribosyl-ATP<br>diphosphatase and<br>phosphoribosyl-AMP<br>cyclohydrolase' |
| 1042 | Star | 7 | 151507555 | 89.39729712 | 9  | -0.032132802 | -33023 | '34.3'               | grmzm2g035<br>893_t01 | 'transport.amino acids'                                                                                                                            |
| 1043 | Star | 7 | 151913077 | 90.15766003 | 9  | -0.079858825 | -9221  | '1.1.1.1'            | grmzm2g057<br>281_t01 | 'PS.lightreaction.photosy<br>stem II.LHC-II'                                                                                                       |
| 1044 | Star | 7 | 152316144 | 90.91580158 | 14 | -0.058489035 | -68253 | '30.5'               | grmzm2g335<br>287_t01 | 'signalling.G-proteins'                                                                                                                            |
| 1045 | Star | 7 | 167105793 | 125.7933142 | 15 | 0.059219318  | -33498 | '26.12'              | grmzm2g126<br>261_t01 | 'misc.peroxidases'                                                                                                                                 |
| 1046 | Star | 7 | 168184709 | 130.4823997 | 13 | 0.045148368  | -577   | '26.10'              | grmzm2g425<br>127_t01 | 'misc.cytochrome P450'                                                                                                                             |
| 1047 | Star | 7 | 168193557 | 130.520854  | 5  | 0.036616985  | -1267  | '27.3.19'            | grmzm2g151<br>811_t01 | 'RNA.regulation of<br>transcription.EIN3-<br>like(EIL) transcription<br>factor family'                                                             |
| 1048 | Star | 8 | 121670463 | 65.96008974 | 11 | 0.045441796  | -12451 | '16.2'               | ac209819.3_f<br>gt005 | 'secondary<br>metabolism.phenylpropa<br>noids'                                                                                                     |



|      |      |   |           |             |    |              |         |          |                       |                                                                       |
|------|------|---|-----------|-------------|----|--------------|---------|----------|-----------------------|-----------------------------------------------------------------------|
| 1049 | Star | 8 | 121963051 | 66.1316561  | 6  | 0.042894621  | -189532 | '29.5'   | grmzm2g095<br>955_t01 | 'protein.degradation'                                                 |
| 1050 | Star | 8 | 144585092 | 74.43452065 | 10 | -0.055256199 | -55819  | '19.30'  | grmzm2g000<br>739_t01 | 'tetrapyrrole<br>synthesis.uroporphyrin-<br>III C-methyltransferase'  |
| 1051 | Star | 8 | 144767036 | 74.6069579  | 5  | -0.056636807 | -2732   | '9.6'    | grmzm2g013<br>712_t01 | 'mitochondrial electron<br>transport / ATP<br>synthesis.cytochrome c' |
| 1052 | Star | 8 | 145553053 | 75.35190474 | 19 | -0.047411963 | -96772  | '30.6'   | grmzm2g375<br>975_t01 | 'signalling.MAP kinases'                                              |
| 1053 | Star | 8 | 149499942 | 78.63341235 | 8  | -0.058651712 | -116    | '29.5.4' | grmzm2g311<br>680_t01 | 'protein.degradation.aspa<br>rtate protease'                          |
| 1054 | Star | 8 | 163958147 | 96.68361641 | 7  | 0.041224908  | -14214  | '10.3.2' | grmzm2g002<br>023_t01 | 'cell wall.hemicellulose<br>synthesis.glucuronoxylan<br>'             |
| 1055 | Star | 8 | 164575505 | 99.62785513 | 54 | 0.021849064  | -29769  | '16.4.1' | grmzm2g338<br>431_t01 | 'secondary metabolism.N<br>misc.alkaloid-like'                        |
| 1056 | Star | 8 | 164575577 | 99.62807455 | 6  | 0.025622402  | -29841  | '16.4.1' | grmzm2g338<br>431_t01 | 'secondary metabolism.N<br>misc.alkaloid-like'                        |

|           |   |           |             |    |              |                   |                       |                                                                        |
|-----------|---|-----------|-------------|----|--------------|-------------------|-----------------------|------------------------------------------------------------------------|
| 1057 Star | 8 | 170790378 | 123.8097673 | 5  | 0.018186972  | -43298 '28.99'    | grmzm2g004<br>690_t01 | 'DNA.unspecified'                                                      |
| 1058 Star | 8 | 171107120 | 125.0290187 | 12 | 0.025903354  | -103951 '30.2.17' | grmzm2g434<br>363_t01 | 'signalling.receptor<br>kinases.DUF 26'                                |
| 1059 Star | 8 | 171214220 | 125.4546422 | 15 | 0.023236917  | -1566 '34.16'     | grmzm2g111<br>511_t01 | 'transport.ABC<br>transporters and<br>multidrug resistance<br>systems' |
| 1060 Star | 8 | 171235640 | 125.5397669 | 5  | 0.03304263   | -22986 '34.16'    | grmzm2g111<br>511_t01 | 'transport.ABC<br>transporters and<br>multidrug resistance<br>systems' |
| 1061 Star | 9 | 6999006   | 8.219780095 | 15 | -0.070552837 | -205400 '20.2.1'  | grmzm2g097<br>620_t01 | 'stress.abiotic.heat'                                                  |
| 1062 Star | 9 | 7182819   | 8.716269429 | 27 | -0.043529797 | -40774 '31.1'     | grmzm2g017<br>257_t01 | 'cell.organisation'                                                    |
| 1063 Star | 9 | 7188622   | 8.731943661 | 42 | -0.041058477 | -46577 '31.1'     | grmzm2g017<br>257_t01 | 'cell.organisation'                                                    |
| 1064 Star | 9 | 8451164   | 12.14214118 | 5  | -0.047028655 | -126106 '26.2'    | grmzm2g403<br>740_t01 | 'misc.UDP glucosyl and<br>glucoronyl transferases'                     |

|      |      |    |           |              |    |              |         |           |                       |                                                                     |
|------|------|----|-----------|--------------|----|--------------|---------|-----------|-----------------------|---------------------------------------------------------------------|
| 1065 | Star | 9  | 134402439 | 70.88375129  | 15 | 0.037960828  | -23346  | '34.21'   | grmzm2g162<br>426_t01 | 'transport.calcium'                                                 |
| 1066 | Star | 9  | 134402663 | 70.88410046  | 6  | 0.036821304  | -23570  | '34.21'   | grmzm2g162<br>426_t01 | 'transport.calcium'                                                 |
| 1067 | Star | 10 | 252732    | -5.658225645 | 12 | -0.051134421 | -44477  | '26.10'   | grmzm2g179<br>143_t01 | 'misc.cytochrome P450'                                              |
| 1068 | Star | 10 | 5058530   | 14.79019912  | 16 | -0.06180889  | -2015   | '13'      | grmzm2g066<br>496_t01 | 'amino acid metabolism'                                             |
| 1069 | Star | 10 | 19566488  | 34.07832787  | 6  | 0.024937218  | -40499  | '13.2.6.3 | grmzm2g181<br>227_t01 | 'amino acid<br>metabolism.degradation.<br>aromatic aa.tryptophan'   |
| 1070 | Star | 10 | 24052625  | 35.28519133  | 6  | -0.043928314 | -205553 | '30.3'    | grmzm2g176<br>472_t01 | 'signalling.calcium'                                                |
| 1071 | Star | 10 | 25801766  | 35.75574637  | 8  | 0.085574049  | -25049  | '11.1.12' | grmzm2g149<br>580_t01 | 'lipid metabolism.FA<br>synthesis and FA<br>elongation.ACP protein' |
| 1072 | Star | 10 | 66920393  | 36.73131562  | 29 | 0.080127465  | -192310 | '30.2.17' | grmzm2g481<br>531_t01 | 'signalling.receptor<br>kinases.DUF 26'                             |
| 1073 | Star | 10 | 89396968  | 41.46314855  | 33 | 0.05899755   | -41782  | '27.1.1'  | grmzm2g039<br>857_t01 | 'RNA.processing.splicin<br>g'                                       |
| 1074 | Star | 10 | 128172908 | 51.27327366  | 11 | 0.06244423   | -28567  | '34.99'   | grmzm2g007<br>481_t01 | 'transport.misc'                                                    |

|      |      |    |           |             |    |              |         |                              |                       |                                             |
|------|------|----|-----------|-------------|----|--------------|---------|------------------------------|-----------------------|---------------------------------------------|
| 1075 | Star | 10 | 129906986 | 52.44415722 | 5  | 0.052854061  | -56495  | '29.5.11. grmzm2g016<br>4.2' | 487_t01               | 'protein.degradation.ubiq<br>uitin.E3.RING' |
| 1076 | Star | 10 | 140767339 | 72.41844784 | 6  | -0.032991889 | -48678  | '29.5.11. grmzm2g140<br>4.2' | 924_t01               | 'protein.degradation.ubiq<br>uitin.E3.RING' |
| 1077 | Star | 10 | 141976268 | 75.93807797 | 6  | -0.020261715 | -86390  | '19.3'                       | grmzm2g108<br>125_t01 | 'tetrapyrrole<br>synthesis.GSA'             |
| 1078 | Star | 10 | 141976795 | 75.94005902 | 15 | -0.022617226 | -86917  | '19.3'                       | grmzm2g108<br>125_t01 | 'tetrapyrrole<br>synthesis.GSA'             |
| 1079 | Star | 10 | 144909314 | 84.63476656 | 5  | -0.022505092 | -757    | '33.99'                      | grmzm2g076<br>602_t01 | 'development.unspecifie<br>d'               |
| 1080 | Star | 10 | 145742058 | 87.95852999 | 6  | -0.025366805 | -13883  | '30.2.17'                    | grmzm2g007<br>477_t01 | 'signalling.receptor<br>kinases.DUF 26'     |
| 1081 | Sucr | 1  | 21442536  | 37.78627202 | 7  | -0.039016626 | -256107 | '10.1'                       | grmzm2g064<br>841_t01 | 'cell wall.precursor<br>synthesis'          |
| 1082 | Sucr | 1  | 21449014  | 37.79227512 | 7  | -0.03673907  | -262585 | '10.1'                       | grmzm2g064<br>841_t01 | 'cell wall.precursor<br>synthesis'          |

|      |      |   |           |             |    |              |         |           |                       |                                                                |
|------|------|---|-----------|-------------|----|--------------|---------|-----------|-----------------------|----------------------------------------------------------------|
| 1083 | Sucr | 1 | 21560442  | 37.97512826 | 47 | -0.038190551 | -96448  | '30.11'   | grmzm2g004<br>523_t01 | 'signalling.light'<br>'hormone'                                |
| 1084 | Sucr | 1 | 21688795  | 38.19316881 | 12 | -0.036506395 | -18850  | '17.5.2'  | grmzm2g415<br>251_t01 | metabolism.ethylene.sig<br>nal transduction'<br>'hormone'      |
| 1085 | Sucr | 1 | 21689538  | 38.19443099 | 17 | -0.081014671 | -19593  | '17.5.2'  | grmzm2g415<br>251_t01 | metabolism.ethylene.sig<br>nal transduction'                   |
| 1086 | Sucr | 1 | 56544677  | 69.98493609 | 7  | 0.091004411  | -158735 | '27.1'    | grmzm2g063<br>657_t01 | 'RNA.processing'                                               |
| 1087 | Sucr | 1 | 69598189  | 76.61808194 | 8  | 0.06063527   | -169304 | '20.1'    | grmzm2g524<br>711_t01 | 'stress.biotic'                                                |
| 1088 | Sucr | 1 | 274645019 | 167.2992575 | 6  | 0.087168737  | -56161  | '26.2'    | grmzm2g074<br>395_t01 | 'misc.UDP glucosyl and<br>glucuronyl transferases'             |
| 1089 | Sucr | 2 | 2076282   | 3.859030239 | 6  | -0.033975872 | -6255   | '27.3.5'  | grmzm2g040<br>736_t01 | 'RNA.regulation of<br>transcription.ARR'                       |
| 1090 | Sucr | 2 | 3086016   | 6.851945591 | 12 | -0.032332673 | -4139   | '27.3.12' | grmzm2g071<br>034_t01 | 'RNA.regulation of<br>transcription.C3H zinc<br>finger family' |
| 1091 | Sucr | 2 | 16641157  | 44.04382336 | 15 | -0.073754786 | -3713   | '34.99'   | grmzm2g080<br>992_t01 | 'transport.misc'                                               |
| 1092 | Sucr | 2 | 22494974  | 54.03923714 | 9  | -0.048242813 | -57435  | '20.2.1'  | grmzm2g070<br>863_t01 | 'stress.abiotic.heat'                                          |

|      |      |   |           |             |    |              |         |                     |                       |                                                      |
|------|------|---|-----------|-------------|----|--------------|---------|---------------------|-----------------------|------------------------------------------------------|
| 1093 | Sucr | 2 | 28592546  | 60.19229134 | 29 | -0.039020967 | -101820 | '29.3.1'            | grmzm2g002<br>903_t01 | 'protein.targeting.nucleus<br>'                      |
| 1094 | Sucr | 2 | 28594174  | 60.19401294 | 7  | -0.040826501 | -103448 | '29.3.1'            | grmzm2g002<br>903_t01 | 'protein.targeting.nucleus<br>'                      |
| 1095 | Sucr | 2 | 28973324  | 60.59496034 | 16 | -0.039233491 | -114926 | '29.4'              | grmzm2g032<br>694_t01 | 'protein.postranslational<br>modification'           |
| 1096 | Sucr | 3 | 13298136  | 40.11395447 | 19 | -0.042921756 | -68782  | '21.1'              | grmzm2g159<br>145_t01 | 'redox.thioredoxin'                                  |
| 1097 | Sucr | 3 | 16863398  | 44.72397195 | 35 | -0.053561956 | -55597  | '25'                | ac215260.3_f<br>gt004 | 'C1-metabolism'                                      |
| 1098 | Sucr | 3 | 16863598  | 44.72423056 | 21 | -0.054013921 | -55797  | '25'                | ac215260.3_f<br>gt004 | 'C1-metabolism'                                      |
| 1099 | Sucr | 3 | 20147626  | 48.97060192 | 5  | -0.037039448 | -25541  | '30.2.20'           | grmzm2g013<br>790_t01 | 'signalling.receptor<br>kinases.wheat LRK10<br>like' |
| 1100 | Sucr | 3 | 110202362 | 58.86475128 | 7  | 0.123753616  | -19788  | '20.1'              | ac230011.2_f<br>gt002 | 'stress.biotic'                                      |
| 1101 | Sucr | 3 | 174587864 | 84.65461078 | 5  | 0.067483949  | -36815  | '29.4'              | grmzm2g074<br>262_t01 | 'protein.postranslational<br>modification'           |
| 1102 | Sucr | 3 | 221390629 | 140.2263942 | 10 | -0.044839083 | -74914  | '29.5.11.<br>4.3.2' | grmzm2g368<br>767_t01 | 'protein.degradation.ubiq<br>uitin.E3.SCF.FBOX'      |

|      |      |   |           |             |    |              |         |                   |                       |                                                                                          |
|------|------|---|-----------|-------------|----|--------------|---------|-------------------|-----------------------|------------------------------------------------------------------------------------------|
| 1103 | Sucr | 4 | 11976890  | 33.81581685 | 5  | 0.063333379  | -119285 | '16.2'            | grmzm2g017<br>557_t01 | 'secondary<br>metabolism.phenylpropa<br>noids'                                           |
| 1104 | Sucr | 4 | 12389613  | 33.87001839 | 25 | 0.073578644  | -224118 | '26.7'            | grmzm2g110<br>965_t01 | 'misc.oxidases - copper,<br>flavone etc.'                                                |
| 1105 | Sucr | 4 | 17655938  | 40.84317673 | 14 | 0.091223346  | -247787 | '27.3.28'         | grmzm2g106<br>798_t01 | 'RNA.regulation of<br>transcription.SBP,Squam<br>osa promoter binding<br>protein family' |
| 1106 | Sucr | 4 | 49286057  | 55.14879543 | 6  | -0.093785941 | -34613  | '34.16'           | grmzm2g031<br>954_t01 | 'transport.ABC<br>transporters and<br>multidrug resistance<br>systems'                   |
| 1107 | Sucr | 4 | 60649130  | 55.4149908  | 15 | -0.083392435 | -37449  | '16.1.5'          | grmzm2g391<br>312_t02 | 'secondary<br>metabolism.isoprenoids.t<br>erpenoids'                                     |
| 1108 | Sucr | 4 | 110959949 | 58.04594151 | 5  | -0.074747404 | -260932 | '29.5.11.<br>4.2' | grmzm2g127<br>690_t01 | 'protein.degradation.ubiq<br>uitin.E3.RING'                                              |
| 1109 | Sucr | 4 | 140704850 | 60.02921307 | 7  | -0.041801329 | -3582   | '17.2.3'          | grmzm2g118<br>717_t01 | 'hormone<br>metabolism.auxin.induce<br>d-regulated-responsive-<br>activated'             |
| 1110 | Sucr | 4 | 173809531 | 84.19454361 | 9  | -0.032604677 | -667232 | '26.22'           | grmzm2g316<br>789_t01 | 'misc.short chain<br>dehydrogenase/reductase<br>(SDR)'                                   |
| 1111 | Sucr | 4 | 173813253 | 84.2005901  | 5  | -0.034242183 | -670954 | '26.22'           | grmzm2g316<br>789_t01 | 'misc.short chain<br>dehydrogenase/reductase<br>(SDR)'                                   |

|      |      |   |           |             |    |              |         |                  |                       |                                                                                                                      |
|------|------|---|-----------|-------------|----|--------------|---------|------------------|-----------------------|----------------------------------------------------------------------------------------------------------------------|
| 1112 | Sucr | 4 | 173813260 | 84.20060147 | 28 | -0.039007994 | -670961 | '26.22'          | grmzm2g316<br>789_t01 | 'misc.short chain<br>dehydrogenase/reductase<br>(SDR)'                                                               |
| 1113 | Sucr | 4 | 175615429 | 86.62964208 | 5  | -0.045120538 | -26961  | '29.6'           | grmzm2g091<br>189_t01 | 'protein.folding'                                                                                                    |
| 1114 | Sucr | 5 | 7403398   | 28.1227481  | 5  | 0.028118305  | -75359  | '31.1'           | grmzm2g460<br>396_t01 | 'cell.organisation'                                                                                                  |
| 1115 | Sucr | 5 | 7568984   | 28.7329509  | 5  | 0.03044864   | -49355  | '31.4'           | grmzm2g147<br>046_t01 | 'cell.vesicle transport'                                                                                             |
| 1116 | Sucr | 5 | 52480298  | 61.27077539 | 9  | 0.075988657  | -162479 | '26.28'          | grmzm2g048<br>904_t01 | 'misc.GDSL-motif lipase'                                                                                             |
| 1117 | Sucr | 5 | 68604010  | 65.0820323  | 8  | 0.067664981  | -21     | '27.3.25'        | grmzm2g088<br>189_t01 | 'RNA.regulation of<br>transcription.MYB<br>domain transcription<br>factor family'                                    |
| 1118 | Sucr | 5 | 68606903  | 65.08331839 | 14 | 0.085965605  | -2914   | '27.3.25'        | grmzm2g088<br>189_t01 | 'RNA.regulation of<br>transcription.MYB<br>domain transcription<br>factor family'                                    |
| 1119 | Sucr | 5 | 73961139  | 66.43957914 | 7  | -0.05697045  | -34031  | '13.1.6.5<br>.2' | grmzm2g168<br>791_t01 | 'amino acid<br>metabolism.synthesis.aro<br>matic<br>aa.tryptophan.anthranilat<br>e<br>phosphoribosyltransferas<br>e' |



|      |      |   |           |             |    |              |                          |                       |                                                           |
|------|------|---|-----------|-------------|----|--------------|--------------------------|-----------------------|-----------------------------------------------------------|
| 1120 | Sucr | 5 | 76585969  | 67.18687192 | 15 | -0.06624114  | -57 '28.99'              | grmzm2g319<br>573_t01 | 'DNA.unspecified'                                         |
| 1121 | Sucr | 5 | 80096521  | 67.90868619 | 6  | -0.061436645 | -4132 '30.2.99'          | grmzm2g093<br>490_t01 | 'signalling.receptor<br>kinases.misc'                     |
| 1122 | Sucr | 5 | 173340061 | 84.83341391 | 9  | 0.040041361  | '29.5.11.<br>-36413 4.2' | grmzm2g460<br>958_t01 | 'protein.degradation.ubiq<br>uitin.E3.RING'               |
| 1123 | Sucr | 5 | 184390409 | 93.70403371 | 8  | 0.03379498   | -467903 '27.2'           | grmzm2g043<br>461_t02 | 'RNA.transcription'                                       |
| 1124 | Sucr | 5 | 184579203 | 93.9214921  | 6  | 0.048528702  | -2643 '30.5'             | grmzm2g148<br>301_t01 | 'signalling.G-proteins'                                   |
| 1125 | Sucr | 5 | 204093596 | 114.9003073 | 8  | 0.029700141  | -71121 '33.99'           | grmzm2g090<br>609_t01 | 'development.unspecifie<br>d'                             |
| 1126 | Sucr | 5 | 204527912 | 116.1688529 | 7  | 0.036011734  | -8763 '17.4.2'           | grmzm2g151<br>223_t02 | 'hormone<br>metabolism.cytokinin.sig<br>nal transduction' |
| 1127 | Sucr | 6 | 120727054 | 44.61545648 | 5  | -0.053699952 | -78750 '27.3.99'         | grmzm2g110<br>168_t01 | 'RNA.regulation of<br>transcription.unclassified<br>'     |
| 1128 | Sucr | 6 | 120956190 | 44.6914035  | 8  | -0.077855121 | -2697 '26.12'            | grmzm2g104<br>109_t01 | 'misc.peroxidases'                                        |

|      |      |   |           |             |    |              |         |            |                       |                                                                 |
|------|------|---|-----------|-------------|----|--------------|---------|------------|-----------------------|-----------------------------------------------------------------|
| 1129 | Sucr | 6 | 125454322 | 46.41917569 | 67 | -0.070562811 | -27104  | '26.12'    | grmzm2g450<br>233_t01 | 'misc.peroxidases'                                              |
| 1130 | Sucr | 6 | 161584484 | 86.71512205 | 10 | -0.089408624 | -2734   | '30.5'     | grmzm2g090<br>034_t01 | 'signalling.G-proteins'                                         |
| 1131 | Sucr | 6 | 161899740 | 87.96647854 | 58 | -0.077401595 | -6527   | '23.1.2.2' | grmzm2g088<br>995_t01 | 'nucleotide<br>metabolism.synthesis.pur<br>ine.GAR Synthetase'  |
| 1132 | Sucr | 7 | 2586268   | 7.006474955 | 17 | -0.036400236 | -26365  | '27.3.12'  | ac199624.4_f<br>gt007 | 'RNA.regulation of<br>transcription.C3H zinc<br>finger family'  |
| 1133 | Sucr | 7 | 3570399   | 12.79412594 | 7  | -0.060608629 | -79964  | '20.1'     | grmzm2g465<br>226_t01 | 'stress.biotic'                                                 |
| 1134 | Sucr | 7 | 107347438 | 54.26102457 | 17 | -0.042958657 | -134133 | '27.3.80'  | grmzm2g071<br>112_t01 | 'RNA.regulation of<br>transcription.zf-HD'                      |
| 1135 | Sucr | 7 | 107748384 | 54.46470141 | 23 | -0.048482794 | -184751 | '20.2.3'   | grmzm2g114<br>706_t01 | 'stress.abiotic.drought/sal<br>t'                               |
| 1136 | Sucr | 7 | 112739677 | 57.00023193 | 20 | -0.052798268 | -68289  | '22.1.2'   | grmzm2g060<br>369_t01 | 'polyamine<br>metabolism.synthesis.SA<br>M decarboxylase'       |
| 1137 | Sucr | 7 | 117566293 | 59.45210806 | 8  | -0.045031015 | -268549 | '27.3.11'  | grmzm2g128<br>212_t01 | 'RNA.regulation of<br>transcription.C2H2 zinc<br>finger family' |

|      |      |   |           |             |    |              |        |          |                                 |                                                                                                            |
|------|------|---|-----------|-------------|----|--------------|--------|----------|---------------------------------|------------------------------------------------------------------------------------------------------------|
| 1138 | Sucr | 7 | 140199828 | 78.55767933 | 6  | 0.050727731  | -5254  | '26.19'  | grmzm2g485<br>559_t01           | 'misc.plastocyanin-like'                                                                                   |
| 1139 | Sucr | 7 | 158146806 | 102.5659158 | 5  | -0.076514492 | -42193 | '        | '11.9.3.3 grmzm2g017<br>550_t01 | 'lipid metabolism.lipid<br>degradation.lysophospho<br>lipases.glycerophosphodi<br>ester phosphodiesterase' |
| 1140 | Sucr | 7 | 169562400 | 134.5167655 | 17 | -0.03237163  | -59463 | '29.5.4' | grmzm2g420<br>910_t01           | 'protein.degradation.aspa<br>rtate protease'                                                               |
| 1141 | Sucr | 8 | 163333139 | 94.90114389 | 20 | 0.100296937  | -7825  | '26.23'  | grmzm2g080<br>816_t01           | 'misc.rhodanese'                                                                                           |
| 1142 | Sucr | 8 | 164331901 | 98.88225877 | 17 | 0.036391177  | -33857 | '20.2.1' | grmzm2g128<br>248_t01           | 'stress.abiotic.heat'                                                                                      |
| 1143 | Sucr | 8 | 164401313 | 99.09699982 | 5  | 0.085464891  | -31457 | '        | '29.5.11. grmzm2g114<br>172_t01 | 'protein.degradation.ubiq<br>uitin.ubiquitin'                                                              |
| 1144 | Sucr | 8 | 164401324 | 99.09703335 | 20 | 0.065104941  | -31468 | '        | '29.5.11. grmzm2g114<br>172_t01 | 'protein.degradation.ubiq<br>uitin.ubiquitin'                                                              |
| 1145 | Sucr | 8 | 164401576 | 99.09780132 | 7  | 0.074809194  | -31720 | '        | '29.5.11. grmzm2g114<br>172_t01 | 'protein.degradation.ubiq<br>uitin.ubiquitin'                                                              |
| 1146 | Sucr | 8 | 168628318 | 113.9072651 | 19 | 0.03649192   | -760   | '30.11'  | grmzm2g135<br>332_t01           | 'signalling.light'                                                                                         |
| 1147 | Sucr | 8 | 172057184 | 128.8248994 | 5  | 0.045679833  | -50309 | '        | '11.9.3.3 grmzm2g153<br>274_t01 | 'lipid metabolism.lipid<br>degradation.lysophospho<br>lipases.glycerophosphodi<br>ester phosphodiesterase' |

|      |       |    |           |             |    |              |         |                                      |                                                                                                                            |
|------|-------|----|-----------|-------------|----|--------------|---------|--------------------------------------|----------------------------------------------------------------------------------------------------------------------------|
| 1148 | Sucr  | 8  | 172057190 | 128.8249236 | 9  | 0.044703695  | -50315  | '11.9.3.3 grmzm2g153<br>274_t01      | 'lipid metabolism.lipid<br>degradation.lysophospho<br>lipases.glycerophosphodi<br>ester phosphodiesterase'                 |
| 1149 | Sucr  | 10 | 2166827   | 0.955425267 | 15 | -0.093456643 | -18229  | '29.6' grmzm2g127<br>393_t01         | 'protein.folding'                                                                                                          |
| 1150 | Sucr  | 10 | 2698524   | 2.792564149 | 42 | -0.098765758 | -6647   | '20.1' grmzm2g356<br>817_t02         | 'stress.biotic'                                                                                                            |
| 1151 | Sucr  | 10 | 3240557   | 4.665416356 | 5  | -0.076233214 | -12409  | '20.1' grmzm2g443<br>939_t02         | 'stress.biotic'                                                                                                            |
| 1152 | Sucr  | 10 | 77488297  | 38.59893808 | 5  | -0.053379979 | -220547 | '29.5.11. grmzm2g305<br>4.2' 582_t01 | 'protein.degradation.ubiq<br>uitin.E3.RING'                                                                                |
| 1153 | Sucr  | 10 | 85544281  | 40.43156797 | 5  | -0.03474644  | -3176   | '26.12' grmzm2g394<br>500_t02        | 'misc.peroxidases'                                                                                                         |
| 1154 | Sucr  | 10 | 113451096 | 45.40733399 | 7  | -0.04402236  | -135064 | '13.1.6.3 grmzm2g125<br>.1' 923_t01  | 'amino acid<br>metabolism.synthesis.aro<br>matic<br>aa.phenylalanine.rogena<br>te dehydratase /<br>prephenate dehydratase' |
| 1155 | Prin1 | 1  | 52690146  | 67.43745454 | 28 | -0.325669425 | -34797  | '27.3.19' grmzm2g033<br>570_t01      | 'RNA.regulation of<br>transcription.EIN3-<br>like(EIL) transcription<br>factor family'                                     |
| 1156 | Prin1 | 1  | 86713369  | 83.51202829 | 6  | -0.361580066 | -47303  | '2.1.2' grmzm2g114<br>772_t01        | 'major CHO<br>metabolism.synthesis.sta<br>rch'                                                                             |

|      |       |   |           |             |    |              |         |          |                       |                                                                                                                  |
|------|-------|---|-----------|-------------|----|--------------|---------|----------|-----------------------|------------------------------------------------------------------------------------------------------------------|
| 1157 | Prin1 | 1 | 89352884  | 84.21946029 | 45 | -0.377779862 | -42252  | '29.4'   | grmzm2g180<br>916_t01 | 'protein.postranslational<br>modification'                                                                       |
| 1158 | Prin1 | 1 | 172752341 | 94.00861544 | 12 | 0.251503889  | -51291  | '33.99'  | grmzm2g049<br>201_t01 | 'development.unspecifie<br>d'                                                                                    |
| 1159 | Prin1 | 1 | 173107592 | 94.12366453 | 7  | 0.364562902  | -9718   | '20.2.1' | grmzm2g003<br>635_t01 | 'stress.abiotic.heat'<br>'nucleotide<br>metabolism.deoxynucleo<br>tide<br>metabolism.pseudouridin<br>e synthase' |
| 1160 | Prin1 | 1 | 206686287 | 118.8958806 | 6  | -0.243142768 | -91322  | '23.5.2' | grmzm2g037<br>648_t01 | 'protein.synthesis.riboso<br>mal<br>'29.2.1.2<br>protein.eukaryotic.60S<br>subunit.L34'                          |
| 1161 | Prin1 | 1 | 212358693 | 123.8826126 | 13 | -0.187087297 | -1907   | '2.34'   | grmzm2g152<br>552_t01 |                                                                                                                  |
| 1162 | Prin1 | 1 | 219369577 | 128.5769255 | 8  | -0.230027518 | -73976  | '28.99'  | grmzm2g015<br>925_t01 | 'DNA.unspecified'                                                                                                |
| 1163 | Prin1 | 1 | 221341695 | 129.3656668 | 18 | -0.363923496 | -119609 | '10.2.1' | grmzm2g044<br>269_t01 | 'cell wall.cellulose<br>synthesis.cellulose<br>synthase'                                                         |
| 1164 | Prin1 | 2 | 2211542   | 4.46960072  | 7  | 0.173420062  | -141515 | '27.3.5' | grmzm2g040<br>736_t01 | 'RNA.regulation of<br>transcription.ARR'                                                                         |
| 1165 | Prin1 | 2 | 2211569   | 4.4697226   | 21 | 0.190449042  | -141542 | '27.3.5' | grmzm2g040<br>736_t01 | 'RNA.regulation of<br>transcription.ARR'                                                                         |

|      |       |   |           |             |    |             |         |           |                       |                                                                                                                                    |
|------|-------|---|-----------|-------------|----|-------------|---------|-----------|-----------------------|------------------------------------------------------------------------------------------------------------------------------------|
| 1166 | Prin1 | 2 | 4299945   | 11.96658077 | 43 | 0.175516911 | -25089  | '17.5.2'  | grmzm2g067<br>463_t01 | 'hormone<br>metabolism.ethylene.sig<br>nal transduction'                                                                           |
| 1167 | Prin1 | 2 | 4870077   | 14.13414888 | 6  | 0.185328555 | -307    | '31.4'    | grmzm2g095<br>308_t01 | 'cell.vesicle transport'<br>'RNA.regulation of<br>transcription.G2-like<br>transcription factor<br>family, GARP'                   |
| 1168 | Prin1 | 2 | 37249730  | 65.55400788 | 27 | 0.483745172 | -63611  | '27.3.20' | grmzm2g093<br>832_t01 | 'misc.beta 1,3 glucan<br>hydrolases'<br>'glycolysis.unclear/dually<br>targeted.fructose-2,6-<br>bisphosphatase<br>(Fru2,6BisPase)' |
| 1169 | Prin1 | 2 | 38625981  | 66.45985177 | 6  | 0.393707078 | -197    | '26.4'    | grmzm2g447<br>691_t02 | 'transport.amino acids'                                                                                                            |
| 1170 | Prin1 | 2 | 39794143  | 67.22873216 | 23 | 0.5113885   | -282215 | '4.3.6'   | grmzm2g326<br>631_t01 | 'RNA.regulation of<br>transcription.Methyl<br>binding domain proteins'                                                             |
| 1171 | Prin1 | 2 | 39879711  | 67.28505273 | 9  | 0.434301435 | -84593  | '34.3'    | grmzm2g155<br>491_t01 | 'signalling.receptor<br>kinases.leucine rich<br>repeat XI'                                                                         |
| 1172 | Prin1 | 2 | 185284281 | 95.94214858 | 24 | 0.238072478 | -38974  | '27.3.59' | grmzm2g048<br>411_t01 | 'RNA.regulation of<br>transcription.CCAAT<br>box binding factor<br>family, HAP5'                                                   |
| 1173 | Prin1 | 2 | 186269385 | 97.19232631 | 15 | 0.189950055 | -132624 | '30.2.11' | ac233861.1_f<br>gt001 | 'stress.abiotic.heat'<br>'tetrapyrrole<br>synthesis.uroporphyrinog<br>en III synthase'                                             |
| 1174 | Prin1 | 2 | 186285785 | 97.21313925 | 13 | 0.19792386  | -9196   | '27.3.16' | grmzm2g022<br>162_t01 |                                                                                                                                    |
| 1175 | Prin1 | 2 | 186766346 | 97.99944104 | 24 | 0.201406468 | -41900  | '20.2.1'  | grmzm2g474<br>367_t01 |                                                                                                                                    |
| 1176 | Prin1 | 2 | 187583042 | 99.21938644 | 6  | 0.193767621 | -12154  | '19.6'    | grmzm2g147<br>955_t01 |                                                                                                                                    |

|      |       |   |           |             |    |              |        |                     |                       |                                                                                                 |
|------|-------|---|-----------|-------------|----|--------------|--------|---------------------|-----------------------|-------------------------------------------------------------------------------------------------|
| 1177 | Prin1 | 2 | 208604410 | 118.3005988 | 5  | -0.291990669 | -80891 | '25'                | grmzm2g124<br>919_t01 | 'C1-metabolism'                                                                                 |
| 1178 | Prin1 | 3 | 6560146   | 25.42100729 | 9  | 0.224131566  | -9343  | '29.2.1.2<br>.1.4'  | grmzm2g499<br>197_t01 | 'protein.synthesis.ribosomal<br>protein.eukaryotic.40S<br>subunit.S4'                           |
| 1179 | Prin1 | 3 | 10019848  | 34.54290833 | 6  | 0.147532068  | -47297 | '13.1.6.2<br>'      | grmzm2g029<br>135_t01 | 'amino acid<br>metabolism.synthesis.aromatic<br>aa.phenylalanine and tyrosine'                  |
| 1180 | Prin1 | 3 | 10798853  | 36.10351096 | 5  | 0.15355804   | -43117 | '34.18'             | grmzm2g051<br>753_t01 | 'transport.unspecified<br>anions'                                                               |
| 1181 | Prin1 | 3 | 173210277 | 83.47025878 | 7  | 0.372725567  | -603   | '1.1.1.2'           | grmzm2g077<br>333_t01 | 'PS.lightreaction.photosystem<br>II.PSII polypeptide subunits'                                  |
| 1182 | Prin1 | 3 | 176397560 | 87.31080195 | 31 | 0.329494913  | -34388 | '31.2'              | grmzm2g007<br>659_t01 | 'cell.division'<br>'RNA.regulation of transcription.<br>MYB domain transcription factor family' |
| 1183 | Prin1 | 3 | 177498347 | 88.92648807 | 6  | -0.320067184 | -50388 | '27.3.25'           | grmzm2g005<br>112_t01 | 'protein.synthesis.initiation'                                                                  |
| 1184 | Prin1 | 3 | 187651158 | 98.71945033 | 7  | -0.295211159 | -46363 | '29.2.3'            | grmzm2g113<br>414_t01 | 'protein.degradation.ubiquitin.E3.SCF.FBOX'                                                     |
| 1185 | Prin1 | 3 | 208541649 | 118.8197976 | 8  | -0.369019896 | -35252 | '29.5.11.<br>4.3.2' | grmzm2g059<br>799_t02 | 'protein.degradation.ubiquitin.E3.SCF.FBOX'                                                     |

|            |   |           |             |    |              |                  |                       |                                                                                     |
|------------|---|-----------|-------------|----|--------------|------------------|-----------------------|-------------------------------------------------------------------------------------|
| 1186 Prin1 | 3 | 212248108 | 123.3033736 | 10 | -0.263177037 | -1566 '16.7'     | grmzm2g349<br>407_t01 | 'secondary<br>metabolism.wax'                                                       |
| 1187 Prin1 | 3 | 212248700 | 123.3041123 | 16 | -0.250746746 | -2158 '16.7'     | grmzm2g349<br>407_t01 | 'secondary<br>metabolism.wax'                                                       |
| 1188 Prin1 | 3 | 213848298 | 126.6560335 | 53 | -0.249180593 | -44440 '26.2'    | grmzm2g048<br>010_t01 | 'misc.UDP glucosyl and<br>glucoronyl transferases'                                  |
| 1189 Prin1 | 3 | 213859916 | 126.6845705 | 6  | -0.219255555 | -63 '1.5.1'      | grmzm2g348<br>512_t03 | 'PS.carbon concentrating<br>mechanism.C4'                                           |
| 1190 Prin1 | 4 | 31722606  | 50.95098413 | 20 | 0.217083693  | -58091 '27.3.22' | grmzm2g048<br>297_t01 | 'RNA.regulation of<br>transcription.HB,Homeo<br>box transcription factor<br>family' |
| 1191 Prin1 | 4 | 90652356  | 57.4372722  | 43 | 0.176560253  | -14948 '10.2'    | grmzm2g093<br>999_t01 | 'cell wall.cellulose<br>synthesis'                                                  |
| 1192 Prin1 | 4 | 176411838 | 87.58887022 | 6  | -0.223703747 | -173143 '28.1'   | grmzm2g115<br>013_t01 | 'DNA.synthesis/chromati<br>n structure'                                             |
| 1193 Prin1 | 4 | 176745377 | 87.99059847 | 6  | -0.231675713 | -5344 '30.11'    | grmzm2g126<br>795_t01 | 'signalling.light'                                                                  |
| 1194 Prin1 | 4 | 177057759 | 88.36684435 | 37 | -0.199910793 | -311746 '12.1.1' | grmzm2g428<br>027_t01 | 'N-metabolism.nitrate<br>metabolism.NR'                                             |



|            |   |           |             |    |              |                  |                       |                                                                                          |
|------------|---|-----------|-------------|----|--------------|------------------|-----------------------|------------------------------------------------------------------------------------------|
| 1195 Prin1 | 4 | 177225650 | 88.56905925 | 19 | -0.22500953  | -75890 '29.4'    | grmzm2g158<br>860_t02 | 'protein.postranslational<br>modification'                                               |
| 1196 Prin1 | 4 | 177456322 | 88.84689021 | 5  | -0.177386326 | -82069 '29.5.3'  | grmzm2g150<br>153_t01 | 'protein.degradation.cyst<br>eine protease'                                              |
| 1197 Prin1 | 4 | 243324592 | 133.223033  | 6  | 0.286380697  | -1333 '3.8.1'    | grmzm2g165<br>931_t01 | 'minor CHO<br>metabolism.galactose.gal<br>actokinases'                                   |
| 1198 Prin1 | 5 | 1875087   | 2.828866055 | 9  | 0.198422919  | -18592 '27.3.28' | grmzm2g138<br>421_t01 | 'RNA.regulation of<br>transcription.SBP,Squam<br>osa promoter binding<br>protein family' |
| 1199 Prin1 | 5 | 16786267  | 47.56865354 | 11 | 0.186128131  | -58601 '34.22'   | grmzm2g077<br>828_t01 | 'transport.cyclic<br>nucleotide or calcium<br>regulated channels'                        |
| 1200 Prin1 | 5 | 18656090  | 49.4044948  | 5  | 0.231641756  | -1554 '27.4'     | grmzm2g138<br>572_t01 | 'RNA.RNA binding'                                                                        |
| 1201 Prin1 | 5 | 19607267  | 50.33047385 | 6  | 0.191852193  | -27864 '34.99'   | grmzm2g124<br>918_t01 | 'transport.misc'                                                                         |
| 1202 Prin1 | 5 | 22228974  | 52.4036044  | 6  | 0.200210132  | -61904 '27.2'    | grmzm2g466<br>938_t01 | 'RNA.transcription'                                                                      |
| 1203 Prin1 | 5 | 22628739  | 52.93108894 | 19 | 0.179737138  | -7626 '27.3.99'  | grmzm2g078<br>379_t01 | 'RNA.regulation of<br>transcription.unclassified<br>'                                    |

|      |       |   |           |             |    |              |         |           |                       |                                                                                                                        |
|------|-------|---|-----------|-------------|----|--------------|---------|-----------|-----------------------|------------------------------------------------------------------------------------------------------------------------|
| 1204 | Prin1 | 5 | 23032929  | 53.4644122  | 13 | 0.192543992  | -137586 | '30.2.24' | grmzm2g330<br>751_t01 | 'signalling.receptor<br>kinases.S-locus<br>glycoprotein like'                                                          |
| 1205 | Prin1 | 5 | 26723660  | 54.83773092 | 5  | 0.181309457  | -473830 | '26.10'   | grmzm2g013<br>082_t01 | 'misc.cytochrome P450'<br>'RNA.regulation of<br>transcription.ARF,                                                     |
| 1206 | Prin1 | 5 | 27926098  | 55.29207074 | 8  | 0.259427803  | -116540 | '27.3.4'  | grmzm2g159<br>399_t01 | Auxin Response Factor<br>family'                                                                                       |
| 1207 | Prin1 | 5 | 205662825 | 119.8501543 | 5  | -0.331878313 | -12994  | '17.2.2'  | grmzm2g074<br>267_t01 | 'hormone<br>metabolism.auxin.signal<br>transduction'                                                                   |
| 1208 | Prin1 | 5 | 205892823 | 120.5961956 | 20 | -0.202211883 | -47113  | '34.19.2' | grmzm2g028<br>325_t01 | 'transport.Major Intrinsic<br>Proteins.TIP'<br>'RNA.regulation of<br>transcription.bHLH,Basi                           |
| 1209 | Prin1 | 5 | 206470516 | 122.4700502 | 8  | -0.182601165 | -6960   | '27.3.6'  | grmzm2g036<br>092_t01 | c Helix-Loop-Helix<br>family'                                                                                          |
| 1210 | Prin1 | 5 | 207093116 | 124.0642086 | 6  | -0.223961036 | -67701  | '10.6.2'  | grmzm2g035<br>503_t01 | 'cell<br>wall.degradation.mannan-<br>xylose-arabinose-fucose'                                                          |
| 1211 | Prin1 | 5 | 207103724 | 124.0880847 | 6  | -0.211548066 | -9175   | '27.3.3'  | grmzm2g055<br>204_t01 | 'RNA.regulation of<br>transcription.AP2/EREB<br>P, APETALA2/Ethylene-<br>responsive element<br>binding protein family' |

|      |       |   |           |              |    |              |         |                   |                       |                                                                                                                           |
|------|-------|---|-----------|--------------|----|--------------|---------|-------------------|-----------------------|---------------------------------------------------------------------------------------------------------------------------|
| 1212 | Prin1 | 5 | 207325275 | 124.5867434  | 7  | -0.207443465 | -67992  | '27.3.24'         | grmzm2g044<br>408_t01 | 'RNA.regulation of<br>transcription.MADS box<br>transcription factor<br>family'                                           |
| 1213 | Prin1 | 6 | 2898813   | -7.559855335 | 7  | -0.16547695  | -170899 | '31.4'            | grmzm2g367<br>941_t02 | 'cell.vesicle transport'                                                                                                  |
| 1214 | Prin1 | 6 | 5873783   | -4.184534568 | 14 | -0.194407963 | -224946 | '13.99'           | grmzm2g034<br>404_t01 | 'amino acid<br>metabolism.misc'                                                                                           |
| 1215 | Prin1 | 6 | 6894842   | -3.026068551 | 14 | -0.172667028 | -189308 | '29.5.11.<br>4.2' | grmzm2g390<br>009_t01 | 'protein.degradation.ubiq<br>uitin.E3.RING'                                                                               |
| 1216 | Prin1 | 6 | 8419109   | -1.296676302 | 10 | -0.156917082 | -6724   | '33.99'           | grmzm2g061<br>186_t02 | 'development.unspecifie<br>d'                                                                                             |
| 1217 | Prin1 | 6 | 14792950  | 5.295348837  | 11 | -0.186212199 | -599112 | '30.2.17'         | grmzm2g160<br>853_t01 | 'signalling.receptor<br>kinases.DUF 26'<br>'RNA.regulation of<br>transcription.bHLH,Basi<br>c Helix-Loop-Helix<br>family' |
| 1218 | Prin1 | 7 | 124476542 | 64.75250337  | 10 | 0.249817163  | -540    | '27.3.6'          | grmzm2g089<br>501_t01 | 'misc.plastocyanin-like'                                                                                                  |
| 1219 | Prin1 | 7 | 153457755 | 93.06309404  | 13 | 0.245403     | -4767   | '26.19'           | grmzm2g107<br>562_t01 | 'mitochondrial electron<br>transport / ATP<br>synthesis.NADH-<br>DH.localisation not<br>clear'                            |
| 1220 | Prin1 | 7 | 156111925 | 98.3472492   | 7  | 0.241907825  | -38438  | '9.1.2'           | grmzm2g396<br>397_t01 |                                                                                                                           |

|      |       |   |           |             |    |              |                                              |                                                                                |
|------|-------|---|-----------|-------------|----|--------------|----------------------------------------------|--------------------------------------------------------------------------------|
| 1221 | Prin1 | 7 | 156185170 | 98.49909898 | 33 | 0.211508581  | '11.9.2.1 grmzm2g179<br>-1757 ' 777_t01      | 'lipid metabolism.lipid<br>degradation.lipases.triac<br>ylglycerol lipase'     |
| 1222 | Prin1 | 7 | 159147927 | 104.6414159 | 9  | 0.180017249  | grmzm2g037<br>-2614 '27.3.67' 444_t01        | 'RNA.regulation of<br>transcription.putative<br>transcription regulator'       |
| 1223 | Prin1 | 7 | 159471791 | 105.3360113 | 5  | 0.203425704  | '29.3.4.9 grmzm2g121<br>-54049 9' 022_t01    | 'protein.targeting.secreto<br>ry pathway.unspecified'                          |
| 1224 | Prin1 | 7 | 159471845 | 105.3361463 | 9  | 0.171827824  | '29.3.4.9 grmzm2g121<br>-54103 9' 022_t01    | 'protein.targeting.secreto<br>ry pathway.unspecified'                          |
| 1225 | Prin1 | 7 | 160106822 | 106.9228459 | 9  | 0.206135369  | '29.5.11. grmzm2g054<br>-3287 4.3.2' 032_t01 | 'protein.degradation.ubiq<br>uitin.E3.SCF.FBOX'                                |
| 1226 | Prin1 | 7 | 169415919 | 134.4048149 | 10 | -0.207507404 | '11.9.3.1 grmzm2g140<br>-16584 ' 811_t01     | 'lipid metabolism.lipid<br>degradation.lysophospho<br>lipases.phospholipase D' |
| 1227 | Prin1 | 8 | 2087948   | 4.782267599 | 7  | 0.209648655  | '29.5.11. grmzm2g417<br>-21167 4.2' 125_t01  | 'protein.degradation.ubiq<br>uitin.E3.RING'                                    |
| 1228 | Prin1 | 8 | 4386420   | 11.24086841 | 11 | 0.365945724  | grmzm2g037<br>-72264 '26.12' 156_t01         | 'misc.peroxidases'                                                             |
| 1229 | Prin1 | 8 | 5283586   | 15.55733838 | 38 | 0.216233202  | grmzm2g017<br>-10226 '31.4' 329_t01          | 'cell.vesicle transport'                                                       |
| 1230 | Prin1 | 8 | 8255624   | 20.95732171 | 5  | 0.182206933  | grmzm2g334<br>-9556 '27.3.67' 457_t01        | 'RNA.regulation of<br>transcription.putative<br>transcription regulator'       |

|      |       |   |           |             |    |              |         |           |                       |                                                                                                               |
|------|-------|---|-----------|-------------|----|--------------|---------|-----------|-----------------------|---------------------------------------------------------------------------------------------------------------|
| 1231 | Prin1 | 8 | 8403455   | 21.19881565 | 12 | 0.37507853   | -147740 | '27.3.67' | ac234160.1_f<br>gt001 | 'RNA.regulation of<br>transcription.putative<br>transcription regulator'                                      |
| 1232 | Prin1 | 8 | 103054530 | 58.74182186 | 7  | 0.277385271  | -11798  | '27.3.37' | grmzm2g096<br>064_t01 | 'RNA.regulation of<br>transcription.AS2,Lateral<br>Organ Boundaries Gene<br>Family'                           |
| 1233 | Prin1 | 8 | 105711842 | 59.67074769 | 21 | 0.237102288  | -70209  | '29.5.2'  | grmzm2g078<br>468_t01 | 'protein.degradation.auto<br>phagy'                                                                           |
| 1234 | Prin1 | 8 | 108389110 | 60.44924097 | 8  | 0.215129664  | -154108 | '27.3.32' | grmzm2g061<br>408_t01 | 'RNA.regulation of<br>transcription.WRKY<br>domain transcription<br>factor family'                            |
| 1235 | Prin1 | 8 | 108849125 | 60.58213104 | 19 | 0.325050069  | -37583  | '30.5'    | grmzm2g150<br>724_t01 | 'signalling.G-proteins'                                                                                       |
| 1236 | Prin1 | 8 | 111264320 | 61.27983748 | 5  | 0.202557625  | -101745 | '33.99'   | grmzm2g179<br>679_t01 | 'development.unspecifie<br>d'                                                                                 |
| 1237 | Prin1 | 8 | 117142297 | 63.44621372 | 6  | 0.231321611  | -123994 | '28.1'    | grmzm2g162<br>112_t01 | 'DNA.synthesis/chromati<br>n structure'                                                                       |
| 1238 | Prin1 | 8 | 117976115 | 63.86193872 | 6  | 0.224320933  | -98989  | '34.12'   | grmzm2g138<br>817_t01 | 'transport.metal'                                                                                             |
| 1239 | Prin1 | 8 | 158510179 | 86.58550567 | 14 | -0.190411215 | -90849  | '30.8'    | grmzm2g423<br>959_t01 | 'signalling.misc'                                                                                             |
| 1240 | Prin1 | 8 | 158697511 | 86.89047423 | 5  | -0.249857512 | -4815   | '11.8.1.2 | grmzm2g010<br>202_t01 | 'lipid<br>metabolism."exotics"<br>(steroids, squalene<br>etc).sphingolipids.serine<br>C-palmitoyltransferase' |

|      |       |   |           |             |    |              |         |               |                       |                                                                                     |
|------|-------|---|-----------|-------------|----|--------------|---------|---------------|-----------------------|-------------------------------------------------------------------------------------|
| 1241 | Prin1 | 8 | 159893599 | 88.49652739 | 21 | -0.181876531 | -20128  | '26.27'       | grmzm2g364<br>863_t01 | 'misc.calcineurin-like<br>phosphoesterase family<br>protein'                        |
| 1242 | Prin1 | 8 | 159898572 | 88.50016935 | 13 | -0.17950465  | -25101  | '26.27'       | grmzm2g364<br>863_t01 | 'misc.calcineurin-like<br>phosphoesterase family<br>protein'                        |
| 1243 | Prin1 | 8 | 162773842 | 93.15571435 | 5  | -0.176464664 | -156311 | '11.9.2.1     | ac233916.1_f<br>gt002 | 'lipid metabolism.lipid<br>degradation.lipases.triac<br>ylglycerol lipase'          |
| 1244 | Prin1 | 9 | 12785133  | 22.10483847 | 6  | -0.158858265 | -52684  | '20.2.2'      | grmzm2g079<br>306_t01 | 'stress.abiotic.cold'                                                               |
| 1245 | Prin1 | 9 | 20668779  | 36.70158796 | 15 | -0.209803433 | -3240   | '34.2'        | grmzm2g404<br>965_t02 | 'transport.sugars'                                                                  |
| 1246 | Prin1 | 9 | 20780641  | 36.88056228 | 5  | -0.183329952 | -34504  | '27.3.22'     | grmzm2g134<br>260_t01 | 'RNA.regulation of<br>transcription.HB,Homeo<br>box transcription factor<br>family' |
| 1247 | Prin1 | 9 | 21433294  | 37.9247786  | 11 | -0.168662562 | -528328 | '29.5.11.20'  | grmzm2g374<br>881_t01 | 'protein.degradation.ubiq<br>uitin.proteasom'                                       |
| 1248 | Prin1 | 9 | 26434264  | 43.26084016 | 8  | -0.174249746 | -1131   | '11.1.8'      | grmzm2g393<br>146_t03 | 'lipid metabolism.FA<br>synthesis and FA<br>elongation.acyl coa<br>ligase'          |
| 1249 | Prin1 | 9 | 34855540  | 44.99799089 | 6  | -0.212168913 | -130582 | '29.5.11.4.2' | grmzm2g065<br>612_t01 | 'protein.degradation.ubiq<br>uitin.E3.RING'                                         |
| 1250 | Prin1 | 9 | 113108447 | 55.8821261  | 7  | -0.307295112 | -235865 | '10.7'        | grmzm2g059<br>785_t01 | 'cell wall.modification'                                                            |

|      |       |    |           |             |    |              |         |                       |                       |                                                                                       |
|------|-------|----|-----------|-------------|----|--------------|---------|-----------------------|-----------------------|---------------------------------------------------------------------------------------|
| 1251 | Prin1 | 9  | 144471186 | 92.93120956 | 15 | -0.279214676 | -231042 | '29.2.1.1<br>.1.1.10' | grmzm2g017<br>957_t01 | 'protein.synthesis.ribosomal<br>protein.prokaryotic.chloroplast.30S subunit.S10'      |
| 1252 | Prin1 | 9  | 144622187 | 93.27205089 | 19 | -0.236362959 | -981    | '20.2.2'              | grmzm2g096<br>355_t01 | 'stress.abiotic.cold'                                                                 |
| 1253 | Prin1 | 9  | 146785494 | 99.6308883  | 11 | -0.180210179 | -6230   | '29.3.1'              | ac149829.2_f<br>gt003 | 'protein.targeting.nucleus'                                                           |
| 1254 | Prin1 | 10 | 3622484   | 6.02423381  | 5  | 0.18783093   | -22975  | '29.2.4'              | grmzm2g129<br>804_t01 | 'protein.synthesis.elongation'                                                        |
| 1255 | Prin1 | 10 | 119575302 | 47.38384118 | 12 | -0.204463112 | -75223  | '20.2.1'              | grmzm2g346<br>839_t01 | 'stress.abiotic.heat'                                                                 |
| 1256 | Prin1 | 10 | 137172137 | 64.52401076 | 13 | 0.291125843  | -51956  | '27.3.36'             | ac209206.3_f<br>gt011 | 'RNA.regulation of transcription.Argonaute'                                           |
| 1257 | Prin1 | 10 | 140585346 | 71.90932116 | 6  | 0.416795748  | -4690   | '27.3.50'             | grmzm2g129<br>147_t01 | 'RNA.regulation of transcription.General Transcription'                               |
| 1258 | Prin2 | 1  | 16528334  | 33.09583561 | 9  | -0.148363759 | -104915 | '29.4.1.5<br>7'       | grmzm2g175<br>164_t01 | 'protein.postranslational modification.kinase.receptor like cytoplasmatic kinase VII' |
| 1259 | Prin2 | 1  | 16774678  | 33.28332749 | 16 | -0.148531763 | -31918  | '27.3.7'              | grmzm2g445<br>634_t01 | 'RNA.regulation of transcription.C2C2(Zn) CO-like, Constans-like zinc finger family'  |

|      |       |   |          |             |    |              |                                 |                      |                       |                                                                              |
|------|-------|---|----------|-------------|----|--------------|---------------------------------|----------------------|-----------------------|------------------------------------------------------------------------------|
| 1260 | Prin2 | 1 | 17321663 | 33.69438463 | 6  | -0.167753428 | '29.2.1.2<br>-34007             | grmzm2g145<br>.1.31' | 308_t01               | 'protein.synthesis.ribosomal<br>protein.eukaryotic.40S<br>subunit.SA'        |
| 1261 | Prin2 | 1 | 21383024 | 37.73112289 | 14 | -0.220900957 | -196595                         | '10.1'               | grmzm2g064<br>841_t01 | 'cell.wall.precursor<br>synthesis'<br>'hormone'                              |
| 1262 | Prin2 | 1 | 21688795 | 38.19316881 | 19 | -0.158781748 | -18850                          | '17.5.2'             | grmzm2g415<br>251_t01 | metabolism.ethylene.sig<br>nal.transduction'                                 |
| 1263 | Prin2 | 1 | 21725760 | 38.25596337 | 8  | -0.160463885 | -14292                          | '26.24'              | grmzm2g114<br>184_t01 | 'misc.GCN5-related N-<br>acetyltransferase'                                  |
| 1264 | Prin2 | 1 | 46712396 | 62.60179969 | 12 | 0.205604085  | '29.5.11.<br>-34913             | grmzm2g104<br>20'    | 373_t01               | 'protein.degradation.ubiq<br>uitin.proteasom'                                |
| 1265 | Prin2 | 1 | 46752724 | 62.62839403 | 29 | 0.217392494  | -39642                          | '31.1'               | grmzm2g104<br>534_t01 | 'cell.organisation'                                                          |
| 1266 | Prin2 | 1 | 48772229 | 63.96015846 | 7  | 0.183706966  | -92461                          | '20.2.1'             | grmzm2g010<br>000_t01 | 'stress.abiotic.heat'                                                        |
| 1267 | Prin2 | 1 | 51413724 | 65.71798167 | 16 | 0.162964157  | -5640                           | '29.8'               | grmzm2g084<br>783_t01 | 'protein.assembly and<br>cofactor ligation'                                  |
| 1268 | Prin2 | 1 | 51506627 | 65.97678122 | 7  | 0.17642016   | '2.2.1.3.<br>-61930             | grmzm2g084<br>1'     | 940_t01               | 'major CHO<br>metabolism.degradation.<br>sucrose.invertases.neutra<br>l'     |
| 1269 | Prin2 | 1 | 92753447 | 85.57176721 | 27 | 0.151936909  | '29.2.1.9<br>9.2.1185<br>-99005 | grmzm2g154<br>'      | 487_t01               | 'protein.synthesis.riboso<br>mal<br>protein.unknown.large<br>subunit.L18/L5' |



|      |       |   |           |             |    |              |         |          |                       |                                                                                     |
|------|-------|---|-----------|-------------|----|--------------|---------|----------|-----------------------|-------------------------------------------------------------------------------------|
| 1270 | Prin2 | 1 | 228544370 | 135.6950109 | 18 | -0.296287834 | -17399  | '17.1.3' | grmzm2g113<br>167_t01 | 'hormone<br>metabolism.abscisic<br>acid.induced-regulated-<br>responsive-activated' |
| 1271 | Prin2 | 1 | 229356638 | 136.3156268 | 6  | -0.360908732 | -1937   | '17.4.1' | grmzm2g404<br>443_t01 | 'hormone<br>metabolism.cytokinin.sy<br>nthesis-degradation'                         |
| 1272 | Prin2 | 1 | 241747994 | 142.5070084 | 6  | -0.352944427 | -39800  | '10.8.1' | grmzm2g019<br>411_t01 | 'cell<br>wall.pectin*esterases.PM<br>E'                                             |
| 1273 | Prin2 | 1 | 244977165 | 144.1767876 | 5  | -0.366739502 | -77835  | '34.15'  | grmzm2g084<br>486_t01 | 'transport.potassium'                                                               |
| 1274 | Prin2 | 1 | 245007633 | 144.1925424 | 9  | -0.295276804 | -29831  | '34.15'  | grmzm2g438<br>960_t01 | 'transport.potassium'                                                               |
| 1275 | Prin2 | 1 | 252877501 | 149.8251302 | 6  | -0.308540541 | -73707  | '34.99'  | grmzm2g021<br>055_t01 | 'transport.misc'                                                                    |
| 1276 | Prin2 | 1 | 253031255 | 149.9489621 | 5  | -0.279689196 | -34757  | '28.1'   | grmzm2g099<br>023_t01 | 'DNA.synthesis/chromati<br>n structure'                                             |
| 1277 | Prin2 | 1 | 253328929 | 150.1887057 | 6  | -0.305359506 | -141409 | '29.4'   | grmzm2g017<br>089_t01 | 'protein.postranslational<br>modification'                                          |
| 1278 | Prin2 | 2 | 4879221   | 14.16891319 | 10 | -0.178554558 | -9451   | '31.4'   | grmzm2g095<br>308_t01 | 'cell.vesicle transport'                                                            |
| 1279 | Prin2 | 2 | 5548572   | 16.71369911 | 43 | -0.154491728 | -28298  | '33.99'  | grmzm2g174<br>784_t01 | 'development.unspecifie<br>d'                                                       |

|      |       |   |           |             |    |              |         |               |                       |                                                                     |
|------|-------|---|-----------|-------------|----|--------------|---------|---------------|-----------------------|---------------------------------------------------------------------|
| 1280 | Prin2 | 2 | 5682220   | 17.22181151 | 5  | -0.156996321 | -107733 | '29.5.11.4.2' | grmzm2g174<br>926_t01 | 'protein.degradation.ubiquitin.E3.RING'                             |
| 1281 | Prin2 | 2 | 26641159  | 57.94684499 | 18 | -0.149499019 | -6089   | '34.9'        | grmzm2g114<br>149_t01 | 'transport.metabolite transporters at the mitochondrial membrane'   |
| 1282 | Prin2 | 2 | 27916738  | 59.06362357 | 30 | -0.172361155 | -15005  | '27.3.4'      | grmzm2g122<br>614_t01 | 'RNA.regulation of transcription.ARF, Auxin Response Factor family' |
| 1283 | Prin2 | 2 | 28972476  | 60.59406358 | 25 | -0.235153714 | -114078 | '29.4'        | grmzm2g032<br>694_t01 | 'protein.postranslational modification'                             |
| 1284 | Prin2 | 2 | 34001062  | 63.56397414 | 13 | -0.186467942 | -26900  | '20.1'        | grmzm2g051<br>921_t01 | 'stress.biotic'                                                     |
| 1285 | Prin2 | 2 | 34937097  | 64.04660572 | 9  | 0.335345874  | -39687  | '34.13'       | grmzm2g138<br>731_t01 | 'transport.peptides and oligopeptides'                              |
| 1286 | Prin2 | 2 | 81996078  | 75.87752354 | 6  | -0.253830438 | -151865 | '26.7'        | grmzm2g028<br>004_t01 | 'misc.oxidases - copper, flavone etc.'                              |
| 1287 | Prin2 | 2 | 124738310 | 77.33837071 | 9  | -0.276512367 | -59874  | '29.5.5'      | grmzm2g132<br>154_t01 | 'protein.degradation.serine protease'                               |

|      |       |   |           |             |    |              |         |            |                       |                                                                               |
|------|-------|---|-----------|-------------|----|--------------|---------|------------|-----------------------|-------------------------------------------------------------------------------|
| 1288 | Prin2 | 2 | 124769416 | 77.34049122 | 25 | -0.297074114 | -90980  | '29.5.5'   | grmzm2g132<br>154_t01 | 'protein.degradation.serine protease'                                         |
| 1289 | Prin2 | 3 | 2915029   | 8.667233227 | 5  | -0.195341132 | -3919   | '17.2.3'   | grmzm2g061<br>005_t01 | 'hormone metabolism.auxin.induced-regulated-responsive-activated'             |
| 1290 | Prin2 | 3 | 3185414   | 10.0663659  | 10 | -0.231447784 | -53421  | '27.3.69'  | grmzm2g085<br>266_t01 | 'RNA.regulation of transcription.SET-domain transcriptional regulator family' |
| 1291 | Prin2 | 3 | 3386685   | 11.10786166 | 18 | -0.158579918 | -29190  | '29.3.4.4' | grmzm2g102<br>795_t01 | 'protein.targeting.secretory pathway.plasma membrane'                         |
| 1292 | Prin2 | 3 | 10750451  | 36.00654587 | 9  | -0.164241331 | -119518 | '26.2'     | grmzm2g338<br>465_t01 | 'misc.UDP glucosyl and glucuronyl transferases'                               |
| 1293 | Prin2 | 3 | 10838771  | 36.18347982 | 6  | -0.116432701 | -83035  | '34.18'    | grmzm2g051<br>753_t01 | 'transport.unspecified anions'                                                |
| 1294 | Prin2 | 3 | 13300926  | 40.11756205 | 6  | -0.186344905 | -71572  | '21.1'     | grmzm2g159<br>145_t01 | 'redox.thioredoxin'                                                           |
| 1295 | Prin2 | 3 | 13633702  | 40.54785389 | 18 | -0.163225589 | -7634   | '27.2'     | grmzm2g102<br>664_t01 | 'RNA.transcription'                                                           |

|            |   |           |             |    |              |                   |                       |                                                                           |
|------------|---|-----------|-------------|----|--------------|-------------------|-----------------------|---------------------------------------------------------------------------|
| 1296 Prin2 | 3 | 13634126  | 40.54840214 | 12 | -0.167661347 | -8058 '27.2'      | grmzm2g102<br>664_t01 | 'RNA.transcription'                                                       |
| 1297 Prin2 | 3 | 14416721  | 41.56032683 | 26 | -0.182957628 | -186199 '27.3.26' | grmzm2g163<br>291_t01 | 'RNA.regulation of transcription.MYB-related transcription factor family' |
| 1298 Prin2 | 3 | 17306447  | 45.29685092 | 9  | -0.237524461 | -2219 '16.7'      | grmzm2g541<br>193_t01 | 'secondary metabolism.wax'                                                |
| 1299 Prin2 | 3 | 19698629  | 48.39003196 | 8  | -0.195530153 | -21856 '26.1'     | grmzm2g169<br>152_t02 | 'misc.misc2'                                                              |
| 1300 Prin2 | 3 | 19800505  | 48.52176145 | 5  | -0.198444438 | -7709 '30.2.17'   | grmzm2g094<br>028_t01 | 'signalling.receptor kinases.DUF 26'                                      |
| 1301 Prin2 | 3 | 51981075  | 56.79858368 | 23 | 0.417597478  | -12830 '27.3.25'  | grmzm2g158<br>700_t01 | 'RNA.regulation of transcription.MYB domain transcription factor family'  |
| 1302 Prin2 | 3 | 54021465  | 57.26319567 | 17 | 0.319862133  | -36286 '27.3.99'  | grmzm2g102<br>014_t01 | 'RNA.regulation of transcription.unclassified'                            |
| 1303 Prin2 | 3 | 106489882 | 58.60975416 | 5  | 0.31895293   | -249853 '28.99'   | grmzm2g351<br>307_t01 | 'DNA.unspecified'                                                         |
| 1304 Prin2 | 3 | 136646099 | 63.07155567 | 5  | -0.237479608 | -287899 '27.3.25' | grmzm2g041<br>415_t01 | 'RNA.regulation of transcription.MYB domain transcription factor family'  |
| 1305 Prin2 | 3 | 171862276 | 82.33409418 | 6  | 0.513407834  | -38074 '34.99'    | grmzm2g081<br>652_t01 | 'transport.misc'                                                          |
| 1306 Prin2 | 3 | 172148591 | 82.5754152  | 5  | 0.518185895  | -1652 '34.10'     | grmzm2g037<br>229_t01 | 'transport.nucleotides'                                                   |

|      |       |   |           |             |    |              |         |                 |                       |                                                                              |
|------|-------|---|-----------|-------------|----|--------------|---------|-----------------|-----------------------|------------------------------------------------------------------------------|
| 1307 | Prin2 | 3 | 173219900 | 83.47836954 | 15 | 0.538906436  | -10226  | '1.1.1.2'       | grmzm2g077<br>333_t01 | 'PS.lightreaction.photosy<br>stem II.PSII polypeptide<br>subunits'           |
| 1308 | Prin2 | 3 | 193922818 | 101.9299488 | 10 | 0.197939448  | -28010  | '29.3.4.9<br>9' | grmzm2g162<br>274_t01 | 'protein.targeting.secreto<br>ry pathway.unspecified'                        |
| 1309 | Prin2 | 3 | 198668625 | 105.7679086 | 5  | 0.17551164   | -69220  | '28.99'         | grmzm2g330<br>229_t01 | 'DNA.unspecified'                                                            |
| 1310 | Prin2 | 4 | 828147    | 2.931410178 | 7  | 0.187879628  | -1090   | '27.3.21'       | grmzm2g073<br>805_t01 | 'RNA.regulation of<br>transcription.GRAS<br>transcription factor<br>family'  |
| 1311 | Prin2 | 4 | 5696047   | 19.49225268 | 12 | -0.299402936 | -25394  | '29.1.11'       | grmzm2g169<br>160_t01 | 'protein.aa<br>activation.serine-tRNA<br>ligase'                             |
| 1312 | Prin2 | 4 | 42018416  | 54.27865297 | 7  | -0.145631996 | -52167  | '27.3.11'       | grmzm2g377<br>165_t01 | 'RNA.regulation of<br>transcription.C2H2 zinc<br>finger family'              |
| 1313 | Prin2 | 4 | 96251735  | 57.74714448 | 7  | -0.124855363 | -384209 | '17.2.3'        | grmzm2g131<br>699_t01 | 'hormone<br>metabolism.auxin.induce<br>d-regulated-responsive-<br>activated' |
| 1314 | Prin2 | 4 | 125186338 | 58.42286198 | 72 | -0.130712371 | -33480  | '30.7'          | grmzm2g095<br>397_t01 | 'signalling.14-3-3<br>proteins'                                              |
| 1315 | Prin2 | 4 | 177668855 | 89.1123214  | 6  | -0.18872756  | -1922   | '33.99'         | grmzm2g079<br>353_t01 | 'development.unspecifie<br>d'                                                |

|            |   |           |             |    |              |                                              |                                                                                                |
|------------|---|-----------|-------------|----|--------------|----------------------------------------------|------------------------------------------------------------------------------------------------|
| 1316 Prin2 | 4 | 199778387 | 105.9507817 | 14 | -0.193006416 | '29.5.11. grmzm2g100<br>-37236 4.2' 913_t02  | 'protein.degradation.ubiq<br>uitin.E3.RING'                                                    |
| 1317 Prin2 | 4 | 242574395 | 130.3125709 | 11 | -0.281573519 | grmzm2g111<br>-922 '11.3.2' 319_t01          | 'lipid<br>metabolism.Phospholipi<br>d synthesis.choline<br>kinase'                             |
| 1318 Prin2 | 5 | 929964    | 0.282533564 | 43 | -0.19293743  | grmzm2g082<br>-1418 '9.1.2' 976_t01          | 'mitochondrial electron<br>transport / ATP<br>synthesis.NADH-<br>DH.localisation not<br>clear' |
| 1319 Prin2 | 5 | 1574000   | 2.018545222 | 10 | -0.231021725 | '29.2.1.2 grmzm2g125<br>-1899 .1.21' 300_t02 | 'protein.synthesis.riboso<br>mal<br>protein.eukaryotic.40S<br>subunit.S21'                     |
| 1320 Prin2 | 5 | 1580722   | 2.036636261 | 5  | -0.228448538 | grmzm2g125<br>-3445 '17.2.1' 552_t04         | 'hormone<br>metabolism.auxin.synthe<br>sis-degradation'                                        |
| 1321 Prin2 | 5 | 1842198   | 2.740351301 | 7  | -0.153703207 | grmzm2g133<br>-17853 '26.1' 407_t01          | 'misc.misc2'                                                                                   |
| 1322 Prin2 | 5 | 2347751   | 4.958870956 | 12 | -0.152516959 | grmzm2g144<br>-5480 '27.3.8' 172_t01         | 'RNA.regulation of<br>transcription.C2C2(Zn)<br>DOF zinc finger family'                        |
| 1323 Prin2 | 5 | 7094245   | 26.093099   | 26 | 0.150251126  | grmzm2g129<br>-6870 '30.11' 889_t01          | 'signalling.light'                                                                             |
| 1324 Prin2 | 5 | 10372835  | 33.33515135 | 9  | 0.176034799  | grmzm2g152<br>-182827 '31.1' 328_t01         | 'cell.organisation'                                                                            |

|      |       |   |           |             |    |              |         |           |                       |                                                                                                                        |
|------|-------|---|-----------|-------------|----|--------------|---------|-----------|-----------------------|------------------------------------------------------------------------------------------------------------------------|
| 1325 | Prin2 | 5 | 26734713  | 54.84190728 | 11 | 0.353426391  | -484883 | '26.10'   | grmzm2g013<br>082_t01 | 'misc.cytochrome P450'                                                                                                 |
| 1326 | Prin2 | 5 | 73804215  | 66.39516104 | 21 | 0.292651485  | -98624  | '27.3.44' | grmzm2g524<br>937_t01 | 'RNA.regulation of<br>transcription.Chromatin<br>Remodeling Factors'                                                   |
| 1327 | Prin2 | 5 | 108262797 | 70.32363616 | 14 | 0.366236504  | -361129 | '29.3.99' | grmzm2g072<br>407_t01 | 'protein.targeting.unkno<br>wn'                                                                                        |
| 1328 | Prin2 | 5 | 143236820 | 72.10704824 | 7  | 0.356617661  | -15080  | '30.3'    | grmzm2g030<br>945_t01 | 'signalling.calcium'                                                                                                   |
| 1329 | Prin2 | 5 | 164299446 | 76.94625198 | 6  | -0.300410103 | -66466  | '11.9.3.3 | grmzm2g018<br>820_t01 | 'lipid metabolism.lipid<br>degradation.lysophospho<br>lipases.glycerophosphodi<br>ester phosphodiesterase'             |
| 1330 | Prin2 | 5 | 165991682 | 78.08035909 | 12 | 0.301900822  | -64882  | '27.3.3'  | grmzm2g047<br>999_t01 | 'RNA.regulation of<br>transcription.AP2/EREB<br>P, APETALA2/Ethylene-<br>responsive element<br>binding protein family' |
| 1331 | Prin2 | 5 | 169382477 | 81.27535729 | 5  | -0.317414291 | -5351   | '11.10.2' | grmzm2g092<br>588_t01 | 'lipid<br>metabolism.glycolipid<br>synthesis.DGDG<br>synthase'                                                         |
| 1332 | Prin2 | 5 | 188788930 | 98.54955746 | 8  | 0.15465899   | -50964  | '33.99'   | grmzm2g315<br>140_t01 | 'development.unspecific<br>d'                                                                                          |
| 1333 | Prin2 | 5 | 194052252 | 102.6015186 | 6  | 0.184420996  | -213754 | '27.3.20' | grmzm2g106<br>185_t01 | 'RNA.regulation of<br>transcription.G2-like<br>transcription factor<br>family, GARP'                                   |

|            |   |           |              |    |              |                               |                       |                                                                                  |
|------------|---|-----------|--------------|----|--------------|-------------------------------|-----------------------|----------------------------------------------------------------------------------|
| 1334 Prin2 | 5 | 203652758 | 113.8406769  | 6  | 0.258309313  | -5454 '34.3'                  | grmzm2g020<br>738_t01 | 'transport.amino acids'                                                          |
| 1335 Prin2 | 5 | 205472185 | 119.231778   | 50 | 0.148970386  | -63878 '31.1'                 | grmzm2g026<br>560_t01 | 'cell.organisation'                                                              |
| 1336 Prin2 | 5 | 207751210 | 125.7483283  | 10 | 0.22159592   | -138981 '29.2.1.1<br>.1.2.29' | grmzm2g159<br>554_t01 | 'protein.synthesis.ribosomal<br>protein.prokaryotic.chloroplast.50S subunit.L29' |
| 1337 Prin2 | 5 | 209217720 | 128.3485035  | 30 | 0.293163871  | -4594 '27.2'                  | grmzm2g055<br>859_t01 | 'RNA.transcription'                                                              |
| 1338 Prin2 | 5 | 209930161 | 130.9277607  | 5  | 0.227274598  | -3685 '29.5.9'                | grmzm2g403<br>454_t01 | 'protein.degradation.AA<br>A type'                                               |
| 1339 Prin2 | 6 | 867384    | -9.864659918 | 6  | 0.365645779  | -73303 '26.1'                 | grmzm2g052<br>825_t01 | 'misc.misc2'                                                                     |
| 1340 Prin2 | 6 | 1957524   | -8.627816461 | 8  | 0.454475095  | -91812 '27.3.12'              | ac233871.1_f<br>gt008 | 'RNA.regulation of<br>transcription.C3H zinc<br>finger family'                   |
| 1341 Prin2 | 6 | 118739798 | 43.69898027  | 13 | -0.578903834 | -583 '30.3'                   | grmzm2g174<br>315_t03 | 'signalling.calcium'                                                             |
| 1342 Prin2 | 6 | 119772986 | 44.24786955  | 73 | -0.412080895 | -90952 '26.19'                | grmzm2g148<br>624_t01 | 'misc.plastocyanin-like'                                                         |



|            |   |           |             |    |              |                            |                       |                                                                        |
|------------|---|-----------|-------------|----|--------------|----------------------------|-----------------------|------------------------------------------------------------------------|
| 1343 Prin2 | 6 | 120956190 | 44.6914035  | 7  | -0.327835409 | -2697 '26.12'              | grmzm2g104<br>109_t01 | 'misc.peroxidases'                                                     |
| 1344 Prin2 | 6 | 165586711 | 102.9473046 | 27 | -0.297375391 | -86902 '30.11'             | grmzm2g145<br>556_t01 | 'signalling.light'                                                     |
| 1345 Prin2 | 6 | 165589669 | 102.9571143 | 8  | -0.289894217 | -89860 '30.11'             | grmzm2g145<br>556_t01 | 'signalling.light'                                                     |
| 1346 Prin2 | 6 | 165667455 | 103.215079  | 20 | -0.261489914 | -167646 '30.11'            | grmzm2g145<br>556_t01 | 'signalling.light'                                                     |
| 1347 Prin2 | 6 | 165667652 | 103.2157324 | 5  | -0.237252512 | -167843 '30.11'            | grmzm2g145<br>556_t01 | 'signalling.light'                                                     |
| 1348 Prin2 | 6 | 166076222 | 104.570689  | 13 | -0.302483541 | -15338 '29.2.1.2<br>'1.12' | grmzm2g132<br>929_t01 | 'protein.synthesis.ribosomal<br>protein.eukaryotic.40S<br>subunit.S12' |
| 1349 Prin2 | 7 | 5428540   | 23.50772999 | 34 | -0.287429645 | -127863 '34.2'             | grmzm2g142<br>063_t01 | 'transport.sugars'                                                     |

|            |   |           |             |    |              |                      |                       |                                                                                                                        |
|------------|---|-----------|-------------|----|--------------|----------------------|-----------------------|------------------------------------------------------------------------------------------------------------------------|
| 1350 Prin2 | 7 | 22002213  | 45.79983088 | 10 | -0.179913126 | -8939 '27.3.3'       | grmzm2g176<br>175_t02 | 'RNA.regulation of<br>transcription.AP2/EREB<br>P, APETALA2/Ethylene-<br>responsive element<br>binding protein family' |
| 1351 Prin2 | 7 | 27302170  | 46.77471414 | 16 | -0.174347347 | -640877 '23.2'       | grmzm2g173<br>063_t01 | 'nucleotide<br>metabolism.degradation'                                                                                 |
| 1352 Prin2 | 7 | 27327128  | 46.7793044  | 9  | -0.205664769 | -665835 '23.2'       | grmzm2g173<br>063_t01 | 'nucleotide<br>metabolism.degradation'                                                                                 |
| 1353 Prin2 | 7 | 29146881  | 47.11399196 | 45 | -0.189498059 | -440042 '10.2.1'     | grmzm2g177<br>631_t01 | 'cell wall.cellulose<br>synthesis.cellulose<br>synthase'                                                               |
| 1354 Prin2 | 7 | 124223168 | 64.44761155 | 10 | -0.142549038 | -75570 '27.3.35'     | grmzm2g358<br>796_t01 | 'RNA.regulation of<br>transcription.bZIP<br>transcription factor<br>family'                                            |
| 1355 Prin2 | 7 | 156185236 | 98.49923581 | 6  | -0.608676503 | '11.9.2.1<br>-1823 ' | grmzm2g179<br>777_t01 | 'lipid metabolism.lipid<br>degradation.lipases.triac<br>ylglycerol lipase'                                             |
| 1356 Prin2 | 7 | 156689760 | 99.54520289 | 27 | -0.178439732 | -8325 '27.3.11'      | ac185108.3_f<br>gt011 | 'RNA.regulation of<br>transcription.C2H2 zinc<br>finger family'                                                        |
| 1357 Prin2 | 7 | 166657242 | 123.8438631 | 41 | 0.243268708  | -105055 '34.15'      | grmzm2g020<br>766_t01 | 'transport.potassium'                                                                                                  |
| 1358 Prin2 | 7 | 167223656 | 126.3055595 | 17 | 0.239027751  | -3846 '29.4'         | grmzm2g166<br>658_t01 | 'protein.postranslational<br>modification'                                                                             |

|            |   |           |             |    |              |                           |                       |                                                                                      |
|------------|---|-----------|-------------|----|--------------|---------------------------|-----------------------|--------------------------------------------------------------------------------------|
| 1359 Prin2 | 7 | 168146779 | 130.3175518 | 8  | 0.250707874  | -9138 '29.3.1'            | ac155434.2_f<br>gt004 | 'protein.targeting.nucleus<br>'                                                      |
| 1360 Prin2 | 7 | 168157307 | 130.3633076 | 7  | 0.263440613  | -10237 '27.3.20'          | ac155434.2_f<br>gt005 | 'RNA.regulation of<br>transcription.G2-like<br>transcription factor<br>family, GARP' |
| 1361 Prin2 | 8 | 10739260  | 27.73471036 | 6  | -0.202260838 | '29.5.11.<br>-331436 4.2' | grmzm2g003<br>930_t01 | 'protein.degradation.ubiq<br>uitin.E3.RING'                                          |
| 1362 Prin2 | 8 | 103399576 | 58.8624408  | 6  | 0.15144341   | -5146 '27.3.67'           | grmzm2g087<br>451_t01 | 'RNA.regulation of<br>transcription.putative<br>transcription regulator'             |
| 1363 Prin2 | 8 | 159090160 | 87.53999331 | 9  | 0.172388561  | -6988 '27.1.2'            | grmzm2g300<br>375_t01 | 'RNA.processing.RNA<br>helicase'                                                     |
| 1364 Prin2 | 8 | 160611990 | 89.64768912 | 20 | 0.195427349  | -32696 '27.3.99'          | grmzm2g070<br>898_t01 | 'RNA.regulation of<br>transcription.unclassified<br>'                                |
| 1365 Prin2 | 8 | 160612122 | 89.6479463  | 28 | 0.216705415  | -32828 '27.3.99'          | grmzm2g070<br>898_t01 | 'RNA.regulation of<br>transcription.unclassified<br>'                                |
| 1366 Prin2 | 8 | 164575465 | 99.62773322 | 5  | 0.134691981  | -29729 '16.4.1'           | grmzm2g338<br>431_t01 | 'secondary metabolism.N<br>misc.alkaloid-like'                                       |
| 1367 Prin2 | 8 | 170618195 | 123.1071582 | 8  | 0.141301951  | -24289 '11.8'             | grmzm2g159<br>643_t01 | 'lipid<br>metabolism."exotics"<br>(steroids, squalene etc)'                          |
| 1368 Prin2 | 8 | 170786240 | 123.7938509 | 6  | 0.133385539  | -39160 '28.99'            | grmzm2g004<br>690_t01 | 'DNA.unspecified'                                                                    |

|            |    |           |              |    |              |                         |                       |                                                                                                       |
|------------|----|-----------|--------------|----|--------------|-------------------------|-----------------------|-------------------------------------------------------------------------------------------------------|
| 1369 Prin2 | 8  | 173793234 | 135.8235771  | 8  | 0.119843765  | -132232 '31.1'          | grmzm2g124<br>883_t01 | 'cell.organisation'                                                                                   |
| 1370 Prin2 | 8  | 173864083 | 136.1091964  | 9  | 0.124329055  | -39941 '10.8.1'         | grmzm2g120<br>779_t01 | 'cell<br>wall.pectin*esterases.PM<br>E'                                                               |
| 1371 Prin2 | 9  | 2701441   | -3.388186607 | 59 | -0.379560098 | -280728 '27.1.19'       | grmzm2g016<br>275_t01 | 'RNA.processing.ribonuc<br>leases'                                                                    |
| 1372 Prin2 | 9  | 3689306   | -0.719907238 | 18 | -0.378505593 | -89654 '17.2.2'         | grmzm2g098<br>643_t01 | 'hormone<br>metabolism.auxin.signal<br>transduction'                                                  |
| 1373 Prin2 | 9  | 7182819   | 8.716269429  | 14 | -0.268943698 | -40774 '31.1'           | grmzm2g017<br>257_t01 | 'cell.organisation'                                                                                   |
| 1374 Prin2 | 9  | 109417983 | 53.84202072  | 8  | 0.254711069  | -106912 '3.5'           | grmzm2g144<br>245_t01 | 'minor CHO<br>metabolism.others'                                                                      |
| 1375 Prin2 | 9  | 109658976 | 53.91939367  | 7  | 0.188444788  | -107174 '20.2.1'        | ac225193.3_f<br>gt004 | 'stress.abiotic.heat'                                                                                 |
| 1376 Prin2 | 9  | 117715320 | 57.64391617  | 6  | 0.137706712  | -19785 '29.4'           | ac217887.3_f<br>gt001 | 'protein.postranslational<br>modification'                                                            |
| 1377 Prin2 | 9  | 138570437 | 79.39501909  | 34 | 0.310626673  | '13.1.3.5<br>-31425 .2' | grmzm2g104<br>575_t01 | 'amino acid<br>metabolism.synthesis.asp<br>artate<br>family.lysine.dihydrodipi<br>colinate reductase' |
| 1378 Prin2 | 10 | 5058530   | 14.79019912  | 46 | -0.424128374 | -2015 '13'              | grmzm2g066<br>496_t01 | 'amino acid metabolism'                                                                               |

|            |    |           |             |    |              |                 |                       |                                                                                      |
|------------|----|-----------|-------------|----|--------------|-----------------|-----------------------|--------------------------------------------------------------------------------------|
| 1379 Prin2 | 10 | 5427445   | 17.07840286 | 12 | -0.377394519 | -60 '27.1.19'   | grmzm2g065<br>804_t01 | 'RNA.processing.ribonuc<br>leases'                                                   |
| 1380 Prin2 | 10 | 6191195   | 21.4060557  | 6  | -0.359938003 | -69179 '28.1'   | grmzm2g044<br>317_t05 | 'DNA.synthesis/chromati<br>n structure'                                              |
| 1381 Prin2 | 10 | 9023970   | 24.98301526 | 9  | -0.188824159 | -67484 '27.3.9' | grmzm2g118<br>214_t01 | 'RNA.regulation of<br>transcription.C2C2(Zn)<br>GATA transcription<br>factor family' |
| 1382 Prin2 | 10 | 22382517  | 34.8358978  | 9  | 0.185011049  | -65821 '10.2.1' | grmzm2g015<br>886_t01 | 'cell wall.cellulose<br>synthesis.cellulose<br>synthase'                             |
| 1383 Prin2 | 10 | 24154443  | 35.31258248 | 6  | 0.360806077  | -307371 '30.3'  | grmzm2g176<br>472_t01 | 'signalling.calcium'                                                                 |
| 1384 Prin2 | 10 | 79797589  | 39.13112595 | 6  | 0.260220052  | -242642 '27.2'  | grmzm2g044<br>306_t01 | 'RNA.transcription'                                                                  |
| 1385 Prin2 | 10 | 85540940  | 40.43084945 | 25 | 0.314408789  | -54606 '29.4'   | grmzm2g060<br>798_t01 | 'protein.postranslational<br>modification'                                           |
| 1386 Prin2 | 10 | 86726870  | 40.71912634 | 15 | 0.304643229  | -116858 '29.4'  | grmzm2g099<br>002_t02 | 'protein.postranslational<br>modification'                                           |
| 1387 Prin2 | 10 | 113194309 | 45.32268893 | 8  | 0.36996183   | -91130 '20.2.3' | grmzm2g138<br>937_t01 | 'stress.abiotic.drought/sal<br>t'                                                    |

|      |       |    |           |             |    |              |        |           |                       |                                                                                      |
|------|-------|----|-----------|-------------|----|--------------|--------|-----------|-----------------------|--------------------------------------------------------------------------------------|
| 1388 | Prin2 | 10 | 133029713 | 57.10017332 | 5  | -0.138816574 | -38470 | '27.3.9'  | grmzm2g054<br>615_t01 | 'RNA.regulation of<br>transcription.C2C2(Zn)<br>GATA transcription<br>factor family' |
| 1389 | Prin2 | 10 | 142607850 | 78.31225962 | 6  | -0.114292892 | -89150 | '26.7'    | grmzm2g396<br>856_t02 | 'misc.oxidases - copper,<br>flavone etc.'                                            |
| 1390 | Prin2 | 10 | 142607858 | 78.31228969 | 7  | -0.146722504 | -89158 | '26.7'    | grmzm2g396<br>856_t02 | 'misc.oxidases - copper,<br>flavone etc.'                                            |
| 1391 | Prin2 | 10 | 142646940 | 78.45920294 | 5  | -0.242947614 | -33448 | '29.5.2'  | grmzm2g419<br>694_t01 | 'protein.degradation.auto<br>phagy'                                                  |
| 1392 | Prin2 | 10 | 143724295 | 81.34148153 | 8  | -0.154720679 | -2125  | '30.2.17' | grmzm2g000<br>633_t01 | 'signalling.receptor<br>kinases.DUF 26'                                              |
| 1393 | Prin2 | 10 | 144247405 | 82.22431479 | 10 | -0.222878534 | -2506  | '10.6.2'  | grmzm2g136<br>895_t01 | 'cell<br>wall.degradation.mannan-<br>xylose-arabinose-fucose'                        |
| 1394 | Prin2 | 10 | 144605053 | 83.42035782 | 8  | -0.228222027 | -50952 | '17.5.1'  | grmzm2g127<br>668_t01 | 'hormone<br>metabolism.ethylene.synt<br>hesis-degradation'                           |

| Significant SNP Information |       |     |                           |                       |                                      |                    |                  |         |               |                                                                                         |
|-----------------------------|-------|-----|---------------------------|-----------------------|--------------------------------------|--------------------|------------------|---------|---------------|-----------------------------------------------------------------------------------------|
| SNP No.                     | Trait | Chr | Physical Position (AGPv1) | Imputed cM on NAM Map | Resample Model Inclusion Probability | Average SNP effect | Distance to Gene | Bincode | Gene ID       | Category                                                                                |
| 1                           | AA    | 1   | 13935133                  | 28.26096353           |                                      | 26                 | -0.085551628     | 35913   | '11.3'        | grmzm2g124042_t01<br>'lipid metabolism.Phospholipid synthesis'                          |
| 2                           | AA    | 1   | 16780363                  | 33.28759975           |                                      | 31                 | -0.081912456     | 175417  | '26.7'        | grmzm2g000427_t01<br>'misc.oxidases - copper, flavone etc.'                             |
| 3                           | AA    | 1   | 33393305                  | 52.652275             |                                      | 11                 | 0.097059759      | 87487   | '20.2.1'      | grmzm2g448368_t01<br>'stress.abiotic.heat'                                              |
| 4                           | AA    | 1   | 165885858                 | 91.92724657           |                                      | 9                  | 0.091736639      | 36073   | '28.1'        | grmzm2g088613_t01<br>'DNA.synthesis/chromatin structure'                                |
| 5                           | AA    | 1   | 177389147                 | 95.59351325           |                                      | 20                 | -0.098789746     | 99723   | '17.2.3'      | grmzm2g422419_t01<br>'hormone metabolism.auxin.induced-regulated-responsive-activated'  |
| 6                           | AA    | 1   | 182391497                 | 97.70267302           |                                      | 18                 | -0.094955313     | 83060   | '27.3.35'     | ac186606.4_fgt003<br>'RNA.regulation of transcription.bZIP transcription factor family' |
| 7                           | AA    | 1   | 192608853                 | 106.1391166           |                                      | 12                 | -0.107384883     | 197459  | '30.1'        | grmzm2g703858_t01<br>'signalling.in sugar and nutrient physiology'                      |
| 8                           | AA    | 1   | 205585447                 | 117.8354213           |                                      | 6                  | -0.061343453     | 37422   | '25.9'        | grmzm2g095579_t01<br>'C1-metabolism.dihydroneopterin aldolase'                          |
| 9                           | AA    | 1   | 205728648                 | 117.9733694           |                                      | 10                 | -0.053004958     | 159819  | '29.5.11.4.2' | grmzm2g112617_t01<br>'protein.degradation.ubiquitin.E3.RING'                            |

|       |   |           |             |    |              |                  |                       |                                                                                     |
|-------|---|-----------|-------------|----|--------------|------------------|-----------------------|-------------------------------------------------------------------------------------|
| 10 AA | 1 | 207120770 | 119.3144261 | 15 | -0.061520606 | 241 '17.4.1'     | grmzm2g348<br>452_t02 | 'hormone<br>metabolism.cytokinin.synthesis-degradation'                             |
| 11 AA | 1 | 207135155 | 119.3282834 | 8  | -0.073649634 | 140185 '20.2.99' | grmzm2g363<br>004_t01 | 'stress.abiotic.unspecific<br>d'                                                    |
| 12 AA | 1 | 208348395 | 120.4695879 | 10 | -0.053930899 | 181373 '16.2'    | grmzm2g059<br>465_t01 | 'secondary<br>metabolism.phenylpropa<br>noids'                                      |
| 13 AA | 1 | 210147485 | 121.9613779 | 9  | -0.073635914 | 3578 '33.99'     | grmzm2g059<br>397_t01 | 'development.unspecific<br>d'                                                       |
| 14 AA | 1 | 211910691 | 123.4234132 | 9  | -0.087541648 | 7666 '26.2'      | grmzm2g139<br>355_t01 | 'misc.UDP glucosyl and<br>glucuronyl transferases'                                  |
| 15 AA | 1 | 218527234 | 128.2400336 | 6  | -0.056062356 | 270453 '27.4'    | grmzm2g146<br>111_t01 | 'RNA.RNA binding'                                                                   |
| 16 AA | 2 | 3369867   | 8.460233144 | 8  | 0.081076721  | 5226 '27.3.22'   | grmzm2g047<br>448_t01 | 'RNA.regulation of<br>transcription.HB,Homeo<br>box transcription factor<br>family' |
| 17 AA | 2 | 4452933   | 12.54822136 | 11 | 0.119133386  | 46523 '30.2.17'  | grmzm2g059<br>740_t01 | 'signalling.receptor<br>kinases.DUF 26'                                             |



|       |   |           |             |    |             |                       |                       |                                                                                                                        |
|-------|---|-----------|-------------|----|-------------|-----------------------|-----------------------|------------------------------------------------------------------------------------------------------------------------|
| 18 AA | 2 | 5461777   | 16.38371574 | 10 | 0.080146925 | 54130 '33.99'         | grmzm2g174<br>784_t01 | 'development.unspecific<br>d'                                                                                          |
| 19 AA | 2 | 6695031   | 20.19476759 | 27 | 0.044923744 | 115956 '30.11'        | grmzm2g159<br>161_t01 | 'signalling.light'                                                                                                     |
| 20 AA | 2 | 10533238  | 30.11324699 | 5  | 0.050106955 | 17911 '29.4'          | grmzm2g098<br>187_t02 | 'protein.postranslational<br>modification'                                                                             |
| 21 AA | 2 | 11104224  | 31.84202766 | 21 | 0.071319845 | '29.5.11.<br>8029 20' | grmzm2g102<br>000_t01 | 'protein.degradation.ubiq<br>uitin.proteasom'                                                                          |
| 22 AA | 2 | 13443804  | 37.94791551 | 22 | 0.054661567 | 30152 '27.3.99'       | grmzm2g131<br>280_t01 | 'RNA.regulation of<br>transcription.unclassified<br>'                                                                  |
| 23 AA | 2 | 20521754  | 51.29525101 | 5  | 0.086430763 | 119197 '27.3.3'       | grmzm2g055<br>180_t01 | 'RNA.regulation of<br>transcription.AP2/EREB<br>P, APETALA2/Ethylene-<br>responsive element<br>binding protein family' |
| 24 AA | 2 | 24175937  | 56.21986729 | 6  | 0.144114822 | 73481 '27.3.25'       | grmzm2g447<br>090_t01 | 'RNA.regulation of<br>transcription.MYB<br>domain transcription<br>factor family'                                      |
| 25 AA | 2 | 37317423  | 65.59856319 | 51 | 0.074663447 | 6542 '28.1'           | grmzm2g044<br>989_t01 | 'DNA.synthesis/chromati<br>n structure'                                                                                |
| 26 AA | 2 | 186765375 | 97.99753568 | 60 | 0.070644387 | 872 '27.3.6'          | grmzm2g417<br>597_t02 | 'RNA.regulation of<br>transcription.bHLH,Basi<br>c Helix-Loop-Helix<br>family'                                         |

|       |   |           |             |    |             |                           |                       |                                                                                          |
|-------|---|-----------|-------------|----|-------------|---------------------------|-----------------------|------------------------------------------------------------------------------------------|
| 27 AA | 2 | 186894631 | 98.25116993 | 31 | 0.074688245 | 9354 '27.3.28'            | grmzm2g126<br>018_t01 | 'RNA.regulation of<br>transcription.SBP,Squam<br>osa promoter binding<br>protein family' |
| 28 AA | 2 | 209329786 | 120.0730566 | 6  | 0.043269516 | 299 '27.4'                | grmzm2g077<br>823_t01 | 'RNA.RNA binding'                                                                        |
| 29 AA | 2 | 215989909 | 128.8383944 | 6  | 0.040326516 | 467 '30.2.11'             | grmzm2g169<br>681_t01 | 'signalling.receptor<br>kinases.leucine rich<br>repeat XI'                               |
| 30 AA | 2 | 217758767 | 131.4548964 | 10 | 0.05228333  | 28968 '7.1.2'             | grmzm2g148<br>769_t02 | 'OPP.oxidative PP.6-<br>phosphogluconolactonas<br>e'                                     |
| 31 AA | 3 | 106253820 | 58.5935399  | 18 | 0.080180593 | '29.5.11.<br>379359 4.2'  | ac206768.3_f<br>gt005 | 'protein.degradation.ubiq<br>uitin.E3.RING'                                              |
| 32 AA | 3 | 136272706 | 62.99233029 | 6  | 0.116539144 | 84299 '27.3.25'           | grmzm2g041<br>415_t01 | 'RNA.regulation of<br>transcription.MYB<br>domain transcription<br>factor family'        |
| 33 AA | 3 | 146217490 | 65.77990892 | 10 | 0.108646925 | 47433 '31.1'              | grmzm2g039<br>867_t01 | 'cell.organisation'                                                                      |
| 34 AA | 3 | 170786664 | 81.70076623 | 6  | 0.085704188 | 3611 '29.7'               | grmzm2g431<br>006_t01 | 'protein.glycosylation'                                                                  |
| 35 AA | 3 | 173982599 | 84.12121149 | 71 | 0.098605713 | 48888 '31.4'              | grmzm2g178<br>244_t01 | 'cell.vesicle transport'                                                                 |
| 36 AA | 3 | 176799382 | 87.90057838 | 11 | 0.102983913 | '29.5.11.<br>47758 4.3.2' | grmzm2g125<br>411_t01 | 'protein.degradation.ubiq<br>uitin.E3.SCF.FBOX'                                          |

|       |   |           |             |    |              |                |                       |                                                                      |
|-------|---|-----------|-------------|----|--------------|----------------|-----------------------|----------------------------------------------------------------------|
| 37 AA | 3 | 211702191 | 122.6221889 | 6  | -0.041297758 | 37009 '8.1.4'  | grmzm2g033<br>515_t01 | 'TCA / org.<br>transformation.TCA.IDH<br>'                           |
| 38 AA | 3 | 212222090 | 123.2709088 | 6  | -0.046587836 | 22506 '16.7'   | grmzm2g349<br>407_t01 | 'secondary<br>metabolism.wax'                                        |
| 39 AA | 3 | 212226136 | 123.2759574 | 5  | -0.06529147  | 18460 '16.7'   | grmzm2g349<br>407_t01 | 'secondary<br>metabolism.wax'                                        |
| 40 AA | 3 | 212726714 | 123.9011201 | 5  | -0.044492619 | 215929 '34.8'  | grmzm2g064<br>473_t01 | 'transport.metabolite<br>transporters at the<br>envelope membrane'   |
| 41 AA | 3 | 214950753 | 128.5482503 | 22 | -0.045348234 | 65376 '19.30'  | grmzm2g105<br>604_t01 | 'tetrapyrrole<br>synthesis.uroporphyrin-<br>III C-methyltransferase' |
| 42 AA | 4 | 171000056 | 79.4221761  | 40 | -0.050350535 | 7838 '34.7'    | grmzm2g466<br>545_t01 | 'transport.phosphate'                                                |
| 43 AA | 4 | 171777409 | 80.83845057 | 9  | -0.04494486  | 2861 '2.1.2.2' | grmzm2g130<br>043_t01 | 'major CHO<br>metabolism.synthesis.sta<br>rch.starch synthase'       |
| 44 AA | 4 | 171777978 | 80.83927823 | 30 | -0.046656729 | 2292 '2.1.2.2' | grmzm2g130<br>043_t01 | 'major CHO<br>metabolism.synthesis.sta<br>rch.starch synthase'       |
| 45 AA | 4 | 172891786 | 82.70364317 | 8  | -0.057980397 | 4988 '29.4'    | grmzm2g111<br>491_t01 | 'protein.postranslational<br>modification'                           |

|       |   |           |              |    |              |                       |                       |                                                                                                 |
|-------|---|-----------|--------------|----|--------------|-----------------------|-----------------------|-------------------------------------------------------------------------------------------------|
| 46 AA | 4 | 238824264 | 119.1769941  | 5  | -0.040095238 | 913 '10.6.3'          | grmzm2g029<br>566_t03 | 'cell<br>wall.degradation.pectate<br>lyases and<br>polygalacturonases'                          |
| 47 AA | 4 | 245327128 | 141.6682023  | 5  | -0.092328356 | 20431 '29.4.1.5<br>7' | grmzm2g025<br>127_t01 | 'protein.postranslational<br>modification.kinase.rece<br>ptor like cytoplasmatic<br>kinase VII' |
| 48 AA | 5 | 1122      | -0.317541556 | 5  | 0.044960637  | 457 '28.1'            | grmzm2g356<br>204_t01 | 'DNA.synthesis/chromati<br>n structure'                                                         |
| 49 AA | 5 | 1049462   | 0.606846713  | 32 | 0.05132495   | 11455 '30.1'          | grmzm2g012<br>229_t01 | 'signalling.in sugar and<br>nutrient physiology'                                                |
| 50 AA | 5 | 1621759   | 2.147079874  | 12 | 0.055070047  | 2989 '29.3.3'         | grmzm2g326<br>272_t01 | 'protein.targeting.chlorop<br>last'                                                             |
| 51 AA | 5 | 2598377   | 6.596313039  | 23 | 0.043582718  | 5950 '16.8.3'         | grmzm2g110<br>881_t04 | 'secondary<br>metabolism.flavonoids.di<br>hydroflavonols'                                       |
| 52 AA | 5 | 2608498   | 6.662437668  | 8  | 0.045011664  | 81658 '16.8.3'        | grmzm2g107<br>076_t01 | 'secondary<br>metabolism.flavonoids.di<br>hydroflavonols'                                       |

|       |   |          |             |    |             |                  |                       |                                                                                                                   |
|-------|---|----------|-------------|----|-------------|------------------|-----------------------|-------------------------------------------------------------------------------------------------------------------|
| 53 AA | 5 | 25375392 | 54.32828941 | 25 | 0.052640963 | 201693 '34.16'   | grmzm2g177<br>314_t01 | 'transport.ABC<br>transporters and<br>multidrug resistance<br>systems'                                            |
| 54 AA | 5 | 27056845 | 54.96362449 | 17 | 0.05259327  | 5051 '30.2.17'   | grmzm2g102<br>862_t01 | 'signalling.receptor<br>kinases.DUF 26'                                                                           |
| 55 AA | 5 | 27066959 | 54.96744605 | 6  | 0.0486529   | 189913 '27.3.50' | grmzm2g001<br>887_t03 | 'RNA.regulation of<br>transcription.General<br>Transcription'                                                     |
| 56 AA | 5 | 27983433 | 55.3137347  | 6  | 0.164199593 | 85509 '29.2.3'   | grmzm2g369<br>939_t01 | 'protein.synthesis.initiati<br>on'                                                                                |
| 57 AA | 5 | 28303009 | 55.43448613 | 8  | 0.241124487 | 196874 '27.3.1'  | grmzm2g018<br>336_t01 | 'RNA.regulation of<br>transcription.ABI3/VP1-<br>related B3-domain-<br>containing transcription<br>factor family' |
| 58 AA | 5 | 29915257 | 56.04367218 | 6  | 0.057108904 | 138778 '27.1.1'  | grmzm2g324<br>540_t01 | 'RNA.processing.splicin<br>g'                                                                                     |
| 59 AA | 5 | 30338901 | 56.28511551 | 23 | 0.221984742 | 30144 '28.99'    | grmzm2g132<br>595_t01 | 'DNA.unspecified'                                                                                                 |
| 60 AA | 5 | 30990738 | 56.84135946 | 15 | 0.062976606 | 142028 '31.1'    | grmzm2g015<br>861_t01 | 'cell.organisation'                                                                                               |
| 61 AA | 5 | 31224995 | 57.04126226 | 6  | 0.071656737 | 36825 '26.10'    | grmzm2g122<br>654_t01 | 'misc.cytochrome P450'                                                                                            |

|       |   |           |             |    |              |                  |                       |                                                                                       |
|-------|---|-----------|-------------|----|--------------|------------------|-----------------------|---------------------------------------------------------------------------------------|
| 62 AA | 5 | 61094522  | 63.52954633 | 39 | 0.213909802  | 35417 '29.4'     | grmzm2g069<br>970_t01 | 'protein.postranslational<br>modification'                                            |
| 63 AA | 5 | 89493802  | 69.57132155 | 5  | -0.046703904 | 134590 '16.7'    | grmzm2g083<br>526_t01 | 'secondary<br>metabolism.wax'                                                         |
| 64 AA | 5 | 185678096 | 95.1872289  | 9  | -0.087360449 | 9409 '29.4'      | grmzm2g096<br>753_t01 | 'protein.postranslational<br>modification'                                            |
| 65 AA | 5 | 191362737 | 100.706813  | 70 | 0.073417146  | 23698 '34.19.2'  | grmzm2g056<br>908_t01 | 'transport.Major Intrinsic<br>Proteins.TIP'                                           |
| 66 AA | 5 | 200532850 | 108.3793509 | 5  | -0.123414326 | 65284 '23.1.1.1' | grmzm2g147<br>450_t01 | 'nucleotide<br>metabolism.synthesis.pyr<br>imidine.carbamoyl<br>phosphate synthetase' |
| 67 AA | 5 | 202772744 | 110.6933233 | 16 | -0.07001925  | 1104 '31.1'      | grmzm2g382<br>341_t01 | 'cell.organisation'                                                                   |
| 68 AA | 5 | 204749015 | 116.8860416 | 7  | 0.083646321  | 10490 '26.28'    | grmzm2g335<br>280_t01 | 'misc.GDSL-motif lipase'                                                              |
| 69 AA | 5 | 206467622 | 122.460663  | 14 | -0.121162674 | 142821 '21.4'    | grmzm2g118<br>366_t01 | 'redox.glutaredoxins'                                                                 |
| 70 AA | 5 | 207521465 | 125.022936  | 8  | -0.056063751 | 2581 '26.7'      | grmzm2g059<br>958_t01 | 'misc.oxidases - copper,<br>flavone etc.'                                             |

|       |   |           |              |    |              |                       |                       |                                                                                                 |
|-------|---|-----------|--------------|----|--------------|-----------------------|-----------------------|-------------------------------------------------------------------------------------------------|
| 71 AA | 5 | 207525531 | 125.0317036  | 16 | -0.085116692 | 31210 '20.2.3'        | grmzm2g140<br>893_t01 | 'stress.abiotic.drought/sal<br>t'                                                               |
| 72 AA | 5 | 209222556 | 128.3660113  | 6  | -0.173721735 | 19237 '29.4'          | grmzm2g058<br>220_t01 | 'protein.postranslational<br>modification'                                                      |
| 73 AA | 5 | 211196887 | 135.9702305  | 23 | -0.069770475 | 32042 '29.5.1'        | grmzm2g163<br>749_t01 | 'protein.degradation.subt<br>ilases'                                                            |
| 74 AA | 5 | 211196920 | 135.9703687  | 64 | -0.080191679 | 32009 '29.5.1'        | grmzm2g163<br>749_t01 | 'protein.degradation.subt<br>ilases'                                                            |
| 75 AA | 6 | 3992126   | -6.319411877 | 5  | -0.093170865 | 28316 '10.6.1'        | grmzm2g009<br>025_t01 | 'cell<br>wall.degradation.cellulas<br>es and beta -1,4-<br>glucanases'                          |
| 76 AA | 6 | 25737849  | 7.832137091  | 22 | -0.098932689 | 1298673 '20.1'        | grmzm2g454<br>556_t01 | 'stress.biotic'<br>'secondary                                                                   |
| 77 AA | 6 | 31537911  | 8.165545093  | 17 | -0.116422372 | 254806 '16.1.5'       | grmzm2g451<br>187_t01 | metabolism.isoprenoids.t<br>erpenoids'                                                          |
| 78 AA | 6 | 79774320  | 11.21454839  | 11 | -0.073829076 | '29.5.11.20'<br>41338 | grmzm2g120<br>047_t01 | 'protein.degradation.ubiq<br>uitin.proteasom'                                                   |
| 79 AA | 6 | 97578306  | 23.60510141  | 10 | -0.064507888 | '29.4.1.5'<br>226232  | grmzm2g162<br>531_t03 | 'protein.postranslational<br>modification.kinase.rece<br>ptor like cytoplasmatic<br>kinase VII' |

|       |   |           |             |    |              |                            |                       |                                                                                         |
|-------|---|-----------|-------------|----|--------------|----------------------------|-----------------------|-----------------------------------------------------------------------------------------|
| 80 AA | 6 | 97988317  | 23.94996475 | 41 | -0.052440749 | 145359 '34.15'             | grmzm2g146<br>760_t01 | 'transport.potassium'                                                                   |
| 81 AA | 6 | 98199018  | 24.12718696 | 9  | -0.053340471 | 19651 '29.5.1'             | grmzm2g073<br>223_t01 | 'protein.degradation.subtilases'                                                        |
| 82 AA | 6 | 98204433  | 24.13174155 | 5  | -0.05362577  | 14236 '29.5.1'             | grmzm2g073<br>223_t01 | 'protein.degradation.subtilases'                                                        |
| 83 AA | 6 | 98282571  | 24.19746402 | 8  | -0.0579035   | 169857 '30.2.17'           | grmzm2g082<br>112_t01 | 'signalling.receptor kinases.DUF 26'                                                    |
| 84 AA | 6 | 99986756  | 25.63086689 | 5  | -0.061329207 | 91970 '31.1'               | grmzm2g092<br>895_t01 | 'cell.organisation'                                                                     |
| 85 AA | 6 | 110900537 | 37.5884191  | 5  | -0.050221184 | 68 '27.3.11'               | grmzm2g016<br>744_t01 | 'RNA.regulation of transcription.C2H2 zinc finger family'                               |
| 86 AA | 6 | 163949428 | 95.77601009 | 10 | 0.05979466   | '29.2.1.1<br>5983 .1.2.21' | grmzm2g085<br>675_t01 | 'protein.synthesis.ribosomal<br>protein.prokaryotic.chloroplast.50S subunit.L21'        |
| 87 AA | 6 | 164286396 | 96.9462491  | 7  | 0.091622048  | 8890 '27.3.30'             | grmzm2g157<br>219_t01 | 'RNA.regulation of transcription.Trihelix, Triple-Helix<br>transcription factor family' |
| 88 AA | 6 | 165260207 | 101.8645066 | 9  | 0.099911569  | 43458 '18.7'               | grmzm2g141<br>252_t01 | 'Co-factor and vitamin metabolism.iron-sulphur clusters'                                |
| 89 AA | 7 | 27056327  | 46.72949889 | 30 | 0.069854871  | 269375 '34.13'             | grmzm2g156<br>794_t01 | 'transport.peptides and oligopeptides'                                                  |



|       |   |           |             |    |             |                       |                       |                                                                 |
|-------|---|-----------|-------------|----|-------------|-----------------------|-----------------------|-----------------------------------------------------------------|
| 90 AA | 7 | 28113557  | 46.92394381 | 6  | 0.042729427 | 2898 '17.2.1'         | grmzm2g016<br>958_t01 | 'hormone<br>metabolism.auxin.synthe<br>sis-degradation'         |
| 91 AA | 7 | 28365776  | 46.97033173 | 8  | 0.044151146 | 74629 '27.1'          | grmzm2g144<br>618_t01 | 'RNA.processing'                                                |
| 92 AA | 7 | 37151920  | 48.23780461 | 7  | 0.043532305 | 412670 '27.3.11'      | grmzm2g443<br>109_t01 | 'RNA.regulation of<br>transcription.C2H2 zinc<br>finger family' |
| 93 AA | 7 | 69012950  | 49.23292513 | 5  | 0.055519521 | 20987 '26.28'         | grmzm2g101<br>117_t01 | 'misc.GDSL-motif lipase'                                        |
| 94 AA | 7 | 83079854  | 49.85510044 | 8  | 0.04954641  | '30.2.8.2<br>215855 ' | grmzm2g011<br>526_t01 | 'signalling.receptor<br>kinases.leucine rich<br>repeat VIII-2'  |
| 95 AA | 7 | 84174593  | 49.90284891 | 8  | 0.04989524  | 309569 '30.2.99'      | grmzm2g354<br>621_t02 | 'signalling.receptor<br>kinases.misc'                           |
| 96 AA | 7 | 139404320 | 77.80580845 | 69 | 0.087922424 | 233476 '34.1'         | grmzm2g114<br>704_t01 | 'transport.p- and v-<br>ATPases'                                |
| 97 AA | 7 | 143287112 | 81.20148454 | 20 | 0.054812272 | 27741 '31.1'          | grmzm2g117<br>603_t01 | 'cell.organisation'                                             |
| 98 AA | 7 | 150564610 | 88.45717741 | 32 | 0.06982965  | 62866 '10.2.1'        | grmzm2g339<br>645_t01 | 'cell wall.cellulose<br>synthesis.cellulose<br>synthase'        |

|        |   |           |             |    |              |                         |                                 |                                                                          |
|--------|---|-----------|-------------|----|--------------|-------------------------|---------------------------------|--------------------------------------------------------------------------|
| 99 AA  | 7 | 167987389 | 129.6248256 | 6  | -0.118145535 | 257 '33.99'             | grmzm2g181<br>605_t01           | 'development.unspecific<br>d'                                            |
|        |   |           |             |    |              |                         |                                 | 'amino acid<br>metabolism.synthesis.asp<br>artate                        |
| 100 AA | 7 | 169227583 | 134.2608759 | 5  | -0.06723496  | 158440 .5'              | '13.1.3.5 grmzm2g140<br>824_t01 | family.lysine.diaminopi<br>melate decarboxylase'                         |
| 101 AA | 8 | 103390158 | 58.85914851 | 73 | 0.067148754  | 409 '27.3.67'           | grmzm2g087<br>451_t01           | 'RNA.regulation of<br>transcription.putative<br>transcription regulator' |
| 102 AA | 8 | 117265267 | 63.49683053 | 11 | 0.076581176  | 7298 '27.3.99'          | grmzm2g065<br>566_t01           | 'RNA.regulation of<br>transcription.unclassified<br>'                    |
| 103 AA | 8 | 161883485 | 91.64355886 | 10 | -0.044006499 | 672 '27.3.55'           | ac183950.2_f<br>gt003           | 'RNA.regulation of<br>transcription.HDA'                                 |
| 104 AA | 8 | 161918620 | 91.67206646 | 11 | -0.049289191 | 66642 '29.5.11.<br>4.2' | grmzm2g065<br>893_t01           | 'protein.degradation.ubiq<br>uitin.E3.RING'                              |
| 105 AA | 8 | 161918881 | 91.67227822 | 36 | -0.053035985 | 66381 '29.5.11.<br>4.2' | grmzm2g065<br>893_t01           | 'protein.degradation.ubiq<br>uitin.E3.RING'                              |
| 106 AA | 8 | 161918960 | 91.67234232 | 7  | -0.052130376 | 66302 '29.5.11.<br>4.2' | grmzm2g065<br>893_t01           | 'protein.degradation.ubiq<br>uitin.E3.RING'                              |
| 107 AA | 8 | 163479600 | 95.34210376 | 11 | -0.050996234 | 1042 '29.4'             | grmzm2g472<br>991_t04           | 'protein.postranslational<br>modification'                               |
| 108 AA | 8 | 170533744 | 122.5329248 | 12 | -0.071952615 | 9592 '27.3.11'          | grmzm2g139<br>160_t01           | 'RNA.regulation of<br>transcription.C2H2 zinc<br>finger family'          |

|        |   |           |             |    |              |                   |                       |                                                                                      |
|--------|---|-----------|-------------|----|--------------|-------------------|-----------------------|--------------------------------------------------------------------------------------|
| 109 AA | 8 | 170538447 | 122.5649034 | 10 | -0.073601987 | 4889 '27.3.11'    | grmzm2g139<br>160_t01 | 'RNA.regulation of<br>transcription.C2H2 zinc<br>finger family'                      |
| 110 AA | 8 | 170538683 | 122.5665081 | 58 | -0.067975625 | 4653 '27.3.11'    | grmzm2g139<br>160_t01 | 'RNA.regulation of<br>transcription.C2H2 zinc<br>finger family'                      |
| 111 AA | 9 | 5956414   | 5.403679997 | 8  | -0.064234269 | 43386 '27.3.99'   | grmzm2g019<br>291_t01 | 'RNA.regulation of<br>transcription.unclassified<br>'                                |
| 112 AA | 9 | 6999573   | 8.221311595 | 5  | -0.059674728 | 109097 '27.2'     | grmzm2g017<br>537_t01 | 'RNA.transcription'                                                                  |
| 113 AA | 9 | 7239482   | 8.869319404 | 9  | -0.047569805 | '17.7.1.5<br>87 ' | grmzm2g000<br>236_t01 | 'hormone<br>metabolism.jasmonate.sy<br>nthesis-degradation.12-<br>Oxo-PDA-reductase' |
| 114 AA | 9 | 7239499   | 8.869365322 | 5  | -0.043097808 | '17.7.1.5<br>70 ' | grmzm2g000<br>236_t01 | 'hormone<br>metabolism.jasmonate.sy<br>nthesis-degradation.12-<br>Oxo-PDA-reductase' |
| 115 AA | 9 | 9143611   | 13.42656327 | 6  | -0.065774986 | 178043 '31.3'     | ac213896.2_f<br>gt005 | 'cell.cycle'                                                                         |
| 116 AA | 9 | 9143948   | 13.42709594 | 23 | -0.0560366   | 177706 '31.3'     | ac213896.2_f<br>gt005 | 'cell.cycle'                                                                         |

|        |   |           |             |    |              |                                          |                                                                                                |
|--------|---|-----------|-------------|----|--------------|------------------------------------------|------------------------------------------------------------------------------------------------|
| 117 AA | 9 | 20663923  | 36.69381857 | 30 | -0.056366108 | '29.4.1.5 grmzm2g433<br>77279 9' 433_t01 | 'protein.postranslational<br>modification.kinase.rece<br>ptor like cytoplasmatic<br>kinase IX' |
| 118 AA | 9 | 20665105  | 36.69570972 | 16 | -0.062945098 | '29.4.1.5 grmzm2g433<br>76097 9' 433_t01 | 'protein.postranslational<br>modification.kinase.rece<br>ptor like cytoplasmatic<br>kinase IX' |
| 119 AA | 9 | 20668477  | 36.70110477 | 32 | -0.060619679 | '29.4.1.5 grmzm2g433<br>72725 9' 433_t01 | 'protein.postranslational<br>modification.kinase.rece<br>ptor like cytoplasmatic<br>kinase IX' |
| 120 AA | 9 | 23215839  | 39.99840064 | 20 | -0.058749345 | 16135 '27.3.27' grmzm2g171<br>395_t01    | 'RNA.regulation of<br>transcription.NAC<br>domain transcription<br>factor family'              |
| 121 AA | 9 | 86468357  | 46.72572703 | 12 | -0.079201882 | 150217 '27.2' grmzm2g570<br>791_t01      | 'RNA.transcription'                                                                            |
| 122 AA | 9 | 116766687 | 57.30110688 | 5  | 0.11081529   | 47008 '29.5' grmzm2g320<br>206_t01       | 'protein.degradation'                                                                          |
| 123 AA | 9 | 116766688 | 57.30110724 | 6  | 0.112627991  | 47007 '29.5' grmzm2g320<br>206_t01       | 'protein.degradation'                                                                          |
| 124 AA | 9 | 133018761 | 68.62115268 | 53 | -0.087203152 | 71041 '30.5' grmzm2g078<br>933_t01       | 'signalling.G-proteins'                                                                        |

|        |    |           |             |    |              |                  |                       |                                                                                    |
|--------|----|-----------|-------------|----|--------------|------------------|-----------------------|------------------------------------------------------------------------------------|
| 125 AA | 9  | 135396489 | 72.43328428 | 16 | -0.066126002 | 1283 '31.4'      | grmzm2g114<br>126_t02 | 'cell.vesicle transport'                                                           |
| 126 AA | 9  | 140748270 | 85.13070924 | 14 | 0.115475213  | 81 '20.1'        | grmzm2g393<br>507_t02 | 'stress.biotic'                                                                    |
| 127 AA | 10 | 18523635  | 33.86783022 | 6  | -0.110952691 | 191354 '20.2.1'  | grmzm2g068<br>316_t01 | 'stress.abiotic.heat'                                                              |
| 128 AA | 10 | 99357506  | 43.32459092 | 9  | -0.055016754 | 25855 '29.5.1'   | grmzm2g157<br>313_t01 | 'protein.degradation.subtilases'                                                   |
| 129 AA | 10 | 102164870 | 43.55066643 | 36 | -0.048664179 | 27252 '33.99'    | ac204711.3_f<br>gt003 | 'development.unspecific<br>d'                                                      |
| 130 AA | 10 | 102628153 | 43.57658233 | 13 | -0.054721851 | 464136 '27.3.99' | grmzm2g001<br>265_t01 | 'RNA.regulation of<br>transcription.unclassified<br>'                              |
| 131 AA | 10 | 111326819 | 44.71918576 | 13 | -0.049289342 | 279441 '9.5'     | grmzm2g023<br>194_t01 | 'mitochondrial electron<br>transport / ATP<br>synthesis.cytochrome c<br>reductase' |

|     |      |    |           |             |    |              |       |                     |                       |                                                                                    |
|-----|------|----|-----------|-------------|----|--------------|-------|---------------------|-----------------------|------------------------------------------------------------------------------------|
| 132 | AA   | 10 | 140890733 | 72.76364342 | 23 | 0.113234282  | 18825 | '27.3.32'           | grmzm2g091<br>331_t01 | 'RNA.regulation of<br>transcription.WRKY<br>domain transcription<br>factor family' |
| 133 | AA   | 10 | 143035801 | 79.92097141 | 6  | 0.075903997  | 14030 | '29.4'              | grmzm2g148<br>506_t01 | 'protein.postranslational<br>modification'                                         |
| 134 | AA   | 10 | 146203306 | 89.79952703 | 10 | 0.075504717  | 21376 | '18.1.1'            | grmzm2g067<br>176_t01 | 'Co-factor and vitamine<br>metabolism.molybdenum<br>cofactor.gephyrin'             |
| 135 | AA   | 10 | 146234149 | 89.92263189 | 71 | 0.074311201  | 3423  | '29.5.11.<br>20'    | grmzm2g368<br>908_t01 | 'protein.degradation.ubiq<br>uitin.proteasom'                                      |
| 136 | AA   | 10 | 148094143 | 99.83248299 | 14 | 0.059544285  | 8364  | '11.1.8'            | grmzm2g074<br>759_t01 | 'lipid metabolism.FA<br>synthesis and FA<br>elongation.acyl coa<br>ligase'         |
| 137 | AA   | 10 | 148490503 | 102.0543415 | 7  | 0.053929166  | 2882  | '29.4'              | grmzm2g104<br>658_t08 | 'protein.postranslational<br>modification'                                         |
| 138 | AA   | 10 | 148496397 | 102.0873812 | 22 | 0.050154105  | 4256  | '29.5.11.<br>4.3.2' | grmzm2g104<br>882_t01 | 'protein.degradation.ubiq<br>uitin.E3.SCF.FBOX'                                    |
| 139 | Chla | 1  | 64135223  | 73.46224774 | 7  | -1.078365591 | 34467 | '26.10'             | grmzm2g084<br>407_t01 | 'misc.cytochrome P450'                                                             |

|     |      |   |           |             |    |              |        |           |         |              |                                                                                                     |
|-----|------|---|-----------|-------------|----|--------------|--------|-----------|---------|--------------|-----------------------------------------------------------------------------------------------------|
| 140 | Chla | 1 | 68902676  | 76.2644894  | 18 | -1.11398638  | 236    | '11.8.4'  | 435_t01 | grmzm2g009   | 'lipid metabolism."exotics" (steroids, squalene etc).3-beta hydroxysteroid dehydrogenase/isomerase' |
| 141 | Chla | 1 | 70951065  | 77.30587192 | 7  | -1.009978169 | 234962 | '27.3.37' | 544_t01 | grmzm2g060   | 'RNA.regulation of transcription.AS2,Lateral Organ Boundaries Gene Family'                          |
| 142 | Chla | 1 | 71560037  | 77.6154678  | 8  | -1.079988686 | 77821  | '26.2'    | gt002   | ac177908.3_f | 'misc.UDP glucosyl and glucuronyl transferases'                                                     |
| 143 | Chla | 1 | 114166513 | 89.09571398 | 6  | -1.00096502  | 67003  | '11.9.2.2 | 198_t01 | grmzm2g110   | 'lipid metabolism.lipid degradation.lipases.acylglycerol lipase'                                    |
| 144 | Chla | 1 | 126428605 | 89.3753375  | 5  | -1.429246348 | 1064   | '29.2.1.2 | 228_t01 | grmzm2g159   | 'protein.synthesis.ribosomal protein.eukaryotic.40S subunit.S4'                                     |
| 145 | Chla | 1 | 139906399 | 89.5123698  | 6  | -1.832781348 | 85909  | '29.4.1.5 | 572_t01 | grmzm2g004   | 'protein.postranslational modification.kinase.receptor like cytoplasmatic kinase VII'               |
| 146 | Chla | 1 | 179696720 | 96.44277983 | 6  | 2.546725312  | 128594 | '11.8'    | 828_t01 | grmzm2g093   | 'lipid metabolism."exotics" (steroids, squalene etc)'                                               |
| 147 | Chla | 1 | 280711700 | 175.6831083 | 16 | -1.675800132 | 41478  | '27.3.22' | 447_t01 | grmzm2g135   | 'RNA.regulation of transcription.HB,Homeobox transcription factor family'                           |

|     |      |   |           |             |    |              |        |                 |                       |                                                                |
|-----|------|---|-----------|-------------|----|--------------|--------|-----------------|-----------------------|----------------------------------------------------------------|
| 148 | Chla | 1 | 283540151 | 178.0419378 | 6  | -1.065382143 | 438718 | '29.3.4.9<br>9' | grmzm2g361<br>220_t01 | 'protein.targeting.secreto<br>ry pathway.unspecified'          |
| 149 | Chla | 1 | 283829657 | 178.2988059 | 23 | -1.082471106 | 149212 | '29.3.4.9<br>9' | grmzm2g361<br>220_t01 | 'protein.targeting.secreto<br>ry pathway.unspecified'          |
| 150 | Chla | 1 | 283830436 | 178.2994971 | 6  | -1.062943975 | 148433 | '29.3.4.9<br>9' | grmzm2g361<br>220_t01 | 'protein.targeting.secreto<br>ry pathway.unspecified'          |
| 151 | Chla | 1 | 284054336 | 178.4981554 | 14 | -1.146037697 | 1528   | '7.3'           | grmzm2g058<br>760_t01 | 'OPP.electron transfer'                                        |
| 152 | Chla | 2 | 1944162   | 3.262633877 | 5  | 0.896831894  | 14386  | '27.3.99'       | grmzm2g068<br>177_t01 | 'RNA.regulation of<br>transcription.unclassified'              |
| 153 | Chla | 2 | 2021345   | 3.611041843 | 12 | 0.871536011  | 150    | '30.11'         | grmzm2g040<br>115_t01 | 'signalling.light'<br>'RNA.regulation of<br>transcription.ARF, |
| 154 | Chla | 2 | 2211569   | 4.4697226   | 48 | 0.962856414  | 42543  | '27.3.4'        | grmzm2g078<br>274_t01 | Auxin Response Factor<br>family'                               |
| 155 | Chla | 2 | 3128671   | 6.982329207 | 6  | 0.876581025  | 35163  | '31.2'          | grmzm2g119<br>773_t01 | 'cell.division'                                                |
| 156 | Chla | 2 | 23800488  | 55.83244658 | 6  | 1.46067929   | 154339 | '31.2'          | grmzm2g124<br>371_t01 | 'cell.division'                                                |



|          |   |          |             |    |              |                 |                       |                                                    |
|----------|---|----------|-------------|----|--------------|-----------------|-----------------------|----------------------------------------------------|
| 157 Chla | 2 | 23881650 | 55.91619654 | 8  | 1.16323104   | 73177 '31.2'    | grmzm2g124<br>371_t01 | 'cell.division'                                    |
| 158 Chla | 2 | 24284899 | 56.33230369 | 13 | 1.367200877  | 26939 '33.99'   | grmzm2g434<br>557_t01 | 'development.unspecifie<br>d'                      |
| 159 Chla | 2 | 24312309 | 56.3605877  | 7  | 1.310766647  | 61877 '27.1.19' | grmzm2g064<br>124_t01 | 'RNA.processing.ribonuc<br>leases'                 |
| 160 Chla | 2 | 25437487 | 57.05362901 | 6  | 1.199994036  | 226579 '33.99'  | ac212859.3_f<br>gt008 | 'development.unspecifie<br>d'                      |
| 161 Chla | 2 | 25437559 | 57.05368243 | 5  | 1.144917046  | 226507 '33.99'  | ac212859.3_f<br>gt008 | 'development.unspecifie<br>d'                      |
| 162 Chla | 2 | 26691735 | 57.98437622 | 14 | 1.092321355  | 681 '27.1'      | grmzm2g171<br>410_t01 | 'RNA.processing'                                   |
| 163 Chla | 2 | 26773008 | 58.04468695 | 6  | 0.928679226  | 23344 '16.2'    | grmzm2g362<br>413_t01 | 'secondary<br>metabolism.phenylpropa<br>noids'     |
| 164 Chla | 2 | 44156463 | 69.46377693 | 6  | -2.024801273 | 41 '26.2'       | grmzm2g009<br>125_t01 | 'misc.UDP glucosyl and<br>glucoronyl transferases' |

|          |   |           |             |    |              |                        |                       |                                                  |
|----------|---|-----------|-------------|----|--------------|------------------------|-----------------------|--------------------------------------------------|
| 165 Chla | 2 | 175505228 | 86.58930765 | 7  | 1.255193753  | 5723 '21.2.1'          | grmzm2g557<br>799_t01 | 'redox.ascorbate and<br>glutathione.ascorbate'   |
| 166 Chla | 3 | 13632616  | 40.54644966 | 5  | 0.97166907   | 45498 '29.4'           | grmzm2g129<br>482_t01 | 'protein.postranslational<br>modification'       |
| 167 Chla | 3 | 17328400  | 45.32523697 | 9  | 1.191986808  | 44204 '16.7'           | grmzm2g438<br>938_t01 | 'secondary<br>metabolism.wax'                    |
| 168 Chla | 3 | 20129322  | 48.94693416 | 8  | 1.760642777  | 26330 '20.2.1'         | grmzm2g437<br>100_t01 | 'stress.abiotic.heat'                            |
| 169 Chla | 3 | 27862522  | 53.36115573 | 10 | 1.423867597  | '29.5.11.<br>7912 4.2' | ac183315.4_f<br>gt006 | 'protein.degradation.ubiq<br>uitin.E3.RING'      |
| 170 Chla | 3 | 142821459 | 64.10032051 | 8  | 2.211347578  | 132510 '31.4'          | grmzm2g016<br>368_t01 | 'cell.vesicle transport'                         |
| 171 Chla | 3 | 176382057 | 87.28804733 | 7  | 2.673712072  | 45625 '11.3'           | grmzm2g083<br>195_t01 | 'lipid<br>metabolism.Phospholipi<br>d synthesis' |
| 172 Chla | 3 | 212248700 | 123.3041123 | 17 | -1.457436983 | 94418 '6.3'            | grmzm2g466<br>833_t01 | 'gluconeogenesis.Malate<br>DH'                   |
| 173 Chla | 3 | 213848077 | 126.6554907 | 48 | -1.687766558 | 40822 '1.5.1'          | grmzm2g121<br>878_t01 | 'PS.carbon concentrating<br>mechanism.C4'        |

|          |   |           |             |    |              |                         |                       |                                                                                         |
|----------|---|-----------|-------------|----|--------------|-------------------------|-----------------------|-----------------------------------------------------------------------------------------|
| 174 Chla | 3 | 213848298 | 126.6560335 | 10 | -1.668877969 | 40601 '1.5.1'           | grmzm2g121<br>878_t01 | 'PS.carbon concentrating<br>mechanism.C4'                                               |
| 175 Chla | 3 | 213894582 | 126.7697196 | 24 | -1.531651849 | 55085 '27.3.69'         | grmzm2g047<br>695_t02 | 'RNA.regulation of<br>transcription.SET-<br>domain transcriptional<br>regulator family' |
| 176 Chla | 3 | 214166666 | 127.4380314 | 10 | -1.452335655 | 106016 '27.3.25'        | grmzm2g143<br>328_t01 | 'RNA.regulation of<br>transcription.MYB<br>domain transcription<br>factor family'       |
| 177 Chla | 3 | 214171011 | 127.4487039 | 27 | -1.512209361 | 101671 '27.3.25'        | grmzm2g143<br>328_t01 | 'RNA.regulation of<br>transcription.MYB<br>domain transcription<br>factor family'       |
| 178 Chla | 3 | 215371494 | 129.1375553 | 18 | -1.61194824  | 37510 '26.10'           | grmzm2g370<br>745_t01 | 'misc.cytochrome P450'                                                                  |
| 179 Chla | 3 | 215732765 | 129.6435644 | 14 | -1.22775052  | 48141 '20.2.1'          | grmzm2g089<br>525_t01 | 'stress.abiotic.heat'                                                                   |
| 180 Chla | 4 | 25857163  | 48.23906117 | 17 | 1.151000831  | '29.5.11.<br>525 4.5.2' | grmzm2g026<br>724_t01 | 'protein.degradation.ubiq<br>uitin.E3.BTB/POZ<br>Cullin3.BTB/POZ'                       |
| 181 Chla | 4 | 33663511  | 51.99288995 | 5  | 1.206422642  | 93904 '27.1.19'         | grmzm2g394<br>747_t01 | 'RNA.processing.ribonuc<br>leases'                                                      |

|     |      |   |           |             |    |              |        |           |                       |                                                                                               |
|-----|------|---|-----------|-------------|----|--------------|--------|-----------|-----------------------|-----------------------------------------------------------------------------------------------|
| 182 | Chla | 4 | 35498708  | 52.93310614 | 10 | 1.229496466  | 95381  | '27.3.65' | grmzm2g118<br>205_t01 | 'RNA.regulation of<br>transcription.Polycomb<br>Group (PcG)'                                  |
| 183 | Chla | 4 | 36054065  | 53.09837236 | 5  | 1.000540179  | 91120  | '31.4'    | grmzm2g390<br>489_t01 | 'cell.vesicle transport'                                                                      |
| 184 | Chla | 4 | 172424061 | 81.94381184 | 13 | -3.771641365 | 38358  | '30.3'    | grmzm2g125<br>838_t01 | 'signalling.calcium'                                                                          |
| 185 | Chla | 4 | 177225726 | 88.56915079 | 8  | -1.412797811 | 89989  | '27.3.67' | grmzm2g475<br>583_t01 | 'RNA.regulation of<br>transcription.putative<br>transcription regulator'                      |
| 186 | Chla | 4 | 177329556 | 88.69420796 | 10 | -2.097767711 | 874    | '17.2.3'  | grmzm2g475<br>683_t01 | 'hormone<br>metabolism.auxin.induce<br>d-regulated-responsive-<br>activated'                  |
| 187 | Chla | 4 | 177855845 | 90.07794504 | 8  | -2.176405818 | 117764 | '27.3.24' | grmzm2g370<br>777_t01 | 'RNA.regulation of<br>transcription.MADS box<br>transcription factor<br>family'               |
| 188 | Chla | 5 | 166987510 | 78.8793885  | 5  | -2.122907288 | 16853  | '30.2.17' | grmzm2g496<br>370_t01 | 'signalling.receptor<br>kinases.DUF 26'                                                       |
| 189 | Chla | 5 | 189389642 | 98.99515772 | 8  | -1.297088271 | 802    | '27.3.7'  | grmzm2g110<br>541_t01 | 'RNA.regulation of<br>transcription.C2C2(Zn)<br>CO-like, Constans-like<br>zinc finger family' |
| 190 | Chla | 5 | 205646722 | 119.7979212 | 13 | -1.057085938 | 111140 | '10.7'    | grmzm2g105<br>844_t01 | 'cell wall.modification'                                                                      |

|          |   |           |             |    |              |                         |                       |                                             |
|----------|---|-----------|-------------|----|--------------|-------------------------|-----------------------|---------------------------------------------|
| 191 Chla | 5 | 205662084 | 119.8477507 | 30 | -1.106120646 | 95778 '10.7'            | grmzm2g105<br>844_t01 | 'cell wall.modification'                    |
| 192 Chla | 5 | 205842860 | 120.4341313 | 9  | -1.314471195 | 51773 '33.99'           | grmzm2g100<br>593_t01 | 'development.unspecifie<br>d'               |
| 193 Chla | 5 | 208092874 | 126.5365424 | 8  | -1.242235214 | '29.5.11.<br>26539 4.2' | grmzm2g323<br>013_t01 | 'protein.degradation.ubiq<br>uitin.E3.RING' |
| 194 Chla | 5 | 208411778 | 126.7985254 | 6  | -1.034251892 | 45087 '29.6'            | grmzm2g015<br>784_t01 | 'protein.folding'                           |
| 195 Chla | 5 | 212548689 | 141.0955085 | 7  | -1.625212605 | 15909 '29.2.3'          | grmzm2g119<br>691_t01 | 'protein.synthesis.initiati<br>on'          |
| 196 Chla | 6 | 125640414 | 46.48436302 | 14 | -2.050901443 | 80901 '26.28'           | grmzm2g150<br>187_t01 | 'misc.GDSL-motif lipase'                    |
| 197 Chla | 6 | 125640415 | 46.48436337 | 17 | -2.07079645  | 80900 '26.28'           | grmzm2g150<br>187_t01 | 'misc.GDSL-motif lipase'                    |
| 198 Chla | 6 | 159559960 | 82.11064054 | 5  | -0.859575964 | 72737 '20.2.99'         | grmzm2g040<br>517_t01 | 'stress.abiotic.unspecifie<br>d'            |

|          |   |           |             |    |              |                |                       |                                                                                                |
|----------|---|-----------|-------------|----|--------------|----------------|-----------------------|------------------------------------------------------------------------------------------------|
| 199 Chla | 7 | 33122197  | 47.86676722 | 19 | 1.636985743  | 169515 '26.21' | grmzm2g000<br>221_t01 | 'misc.protease<br>inhibitor/seed<br>storage/lipid transfer<br>protein (LTP) family<br>protein' |
| 200 Chla | 7 | 35108196  | 48.14677419 | 7  | 2.022809364  | 96849 '15.2'   | grmzm2g042<br>692_t01 | 'metal handling.binding,<br>chelation and storage'                                             |
| 201 Chla | 7 | 35397449  | 48.15875943 | 7  | 1.157786171  | 89645 '28.99'  | grmzm2g364<br>697_t01 | 'DNA.unspecified'                                                                              |
| 202 Chla | 7 | 42768959  | 48.86677354 | 5  | 0.867518993  | 3169 '27.2'    | grmzm2g146<br>331_t01 | 'RNA.transcription'                                                                            |
| 203 Chla | 7 | 125979602 | 66.69618807 | 7  | 2.632081769  | 83415 '20.2.1' | grmzm2g069<br>651_t01 | 'stress.abiotic.heat'                                                                          |
| 204 Chla | 7 | 157918090 | 102.0917472 | 6  | 1.307677429  | 12528 '30.5'   | grmzm2g050<br>501_t01 | 'signalling.G-proteins'                                                                        |
| 205 Chla | 8 | 8405589   | 21.20394308 | 18 | 1.770676205  | 13355 '26.3'   | ac234160.1_f<br>gt003 | 'misc.gluco-, galacto-<br>and mannosidases'                                                    |
| 206 Chla | 9 | 21661674  | 38.29017663 | 5  | -1.285619712 | 2138 '10.1.7'  | grmzm2g115<br>124_t01 | 'cell wall.precursor<br>synthesis.GMD'                                                         |
| 207 Chla | 9 | 21670412  | 38.30415705 | 15 | -1.744014465 | 71062 '29.5.4' | grmzm2g144<br>440_t01 | 'protein.degradation.aspa<br>rtate protease'                                                   |

|     |      |    |           |             |    |              |                          |                       |                                                                                          |
|-----|------|----|-----------|-------------|----|--------------|--------------------------|-----------------------|------------------------------------------------------------------------------------------|
| 208 | Chla | 9  | 23215197  | 39.99779948 | 11 | -1.046360749 | 16777 '27.3.27'          | grmzm2g171<br>395_t01 | 'RNA.regulation of<br>transcription.NAC<br>domain transcription<br>factor family'        |
| 209 | Chla | 9  | 26434264  | 43.26084016 | 59 | -1.065132951 | 63090 '20.2.1'           | grmzm2g152<br>373_t01 | 'stress.abiotic.heat'                                                                    |
| 210 | Chla | 10 | 143379980 | 80.93578714 | 10 | 1.736257572  | 329403 '31.3'            | grmzm2g366<br>270_t01 | 'cell.cycle'                                                                             |
| 211 | Chla | 10 | 145845320 | 88.37068362 | 8  | 1.167874183  | 1942 '27.3.28'           | grmzm2g058<br>588_t01 | 'RNA.regulation of<br>transcription.SBP,Squam<br>osa promoter binding<br>protein family' |
| 212 | Chla | 10 | 148232936 | 100.610509  | 8  | 1.106911557  | 45256 '27.1.19'          | grmzm2g177<br>340_t01 | 'RNA.processing.ribonuc<br>leases'                                                       |
| 213 | Chla | 10 | 148450393 | 101.8294985 | 36 | 1.201764063  | '13.1.4.4<br>34390 '     | grmzm2g104<br>613_t01 | 'amino acid<br>metabolism.synthesis.bra<br>nched chain<br>group.leucine specific'        |
| 214 | Chla | 10 | 148497003 | 102.0907782 | 6  | 1.10547339   | '29.5.11.<br>3650 4.3.2' | grmzm2g104<br>882_t01 | 'protein.degradation.ubiq<br>uitin.E3.SCF.FBOX'                                          |
| 215 | Chla | 10 | 148499295 | 102.1036264 | 9  | 1.10891694   | '29.5.11.<br>1358 4.3.2' | grmzm2g104<br>882_t01 | 'protein.degradation.ubiq<br>uitin.E3.SCF.FBOX'                                          |
| 216 | Chlb | 1  | 97031439  | 87.3597852  | 18 | 0.627113181  | 154744 '20.2.1'          | grmzm2g367<br>023_t01 | 'stress.abiotic.heat'                                                                    |

|     |      |   |           |             |    |              |        |            |                       |                                                                                                   |
|-----|------|---|-----------|-------------|----|--------------|--------|------------|-----------------------|---------------------------------------------------------------------------------------------------|
| 217 | Chlb | 1 | 101441507 | 87.90304019 | 5  | 0.237222688  | 707312 | '10.7'     | grmzm2g070<br>271_t01 | 'cell wall.modification'                                                                          |
|     |      |   |           |             |    |              |        |            |                       | 'lipid<br>metabolism.Phospholipi<br>d synthesis.choline-<br>phosphate<br>cytidyltransferase'      |
| 218 | Chlb | 1 | 103855930 | 88.27009228 | 13 | 0.528617492  | 654699 | '11.3.6'   | grmzm2g132<br>898_t01 | 'protein.targeting.secreto<br>ry pathway.plasma<br>membrane'                                      |
| 219 | Chlb | 1 | 138458661 | 89.49765026 | 6  | 0.636936144  | 65479  | '29.3.4.4' | grmzm2g014<br>872_t01 | 'RNA.RNA binding'                                                                                 |
| 220 | Chlb | 1 | 141762525 | 89.53124152 | 15 | 0.677150275  | 787856 | '27.4'     | grmzm2g152<br>526_t01 | 'development.unspecifie<br>d'                                                                     |
| 221 | Chlb | 1 | 146716486 | 89.58160975 | 18 | 37.87537959  | 89791  | '33.99'    | grmzm2g432<br>850_t01 | 'amino acid<br>metabolism.synthesis.asp<br>artate<br>family.lysine.diaminopi<br>melate epimerase' |
| 222 | Chlb | 1 | 150498647 | 89.94777187 | 5  | 0.650291443  | 237911 | '13.1.3.5' | grmzm2g130<br>332_t01 | 'stress.biotic'                                                                                   |
| 223 | Chlb | 1 | 163239765 | 91.63742221 | 8  | 0.375622346  | 703536 | '20.1'     | grmzm2g443<br>525_t01 | 'RNA.RNA binding'                                                                                 |
| 224 | Chlb | 1 | 181947110 | 97.49187685 | 6  | -0.41770935  | 848    | '27.4'     | grmzm2g023<br>591_t02 | 'signalling.calcium'                                                                              |
| 225 | Chlb | 1 | 187131514 | 101.742233  | 14 | -0.546446647 | 71893  | '30.3'     | ac213857.4_f<br>gt003 |                                                                                                   |



|     |      |   |           |             |    |              |        |           |                       |                                                                                 |
|-----|------|---|-----------|-------------|----|--------------|--------|-----------|-----------------------|---------------------------------------------------------------------------------|
| 226 | Chlb | 1 | 202975799 | 116.1587985 | 10 | -0.587258205 | 38265  | '10.7'    | grmzm2g106<br>899_t01 | 'cell wall.modification'                                                        |
| 227 | Chlb | 1 | 205257253 | 117.519266  | 7  | -0.562896571 | 168    | '27.3.11' | grmzm2g104<br>516_t01 | 'RNA.regulation of<br>transcription.C2H2 zinc<br>finger family'                 |
| 228 | Chlb | 1 | 225624776 | 133.6401321 | 12 | -0.665556716 | 79527  | '30.4.1'  | grmzm2g374<br>973_t01 | 'signalling.phosphinositi<br>des.phosphatidylinositol-<br>4-phosphate 5-kinase' |
| 229 | Chlb | 1 | 228532522 | 135.6859584 | 17 | -0.333710526 | 344103 | '27.3.99' | grmzm2g014<br>676_t01 | 'RNA.regulation of<br>transcription.unclassified<br>'                           |
| 230 | Chlb | 1 | 285864445 | 180.8598811 | 14 | -1.175768963 | 33886  | '28.1'    | grmzm2g371<br>210_t01 | 'DNA.synthesis/chromati<br>n structure'                                         |
| 231 | Chlb | 1 | 291825337 | 191.0554431 | 5  | 1.628826253  | 105497 | '29.5'    | grmzm2g155<br>580_t01 | 'protein.degradation'                                                           |
| 232 | Chlb | 1 | 294322791 | 196.7251432 | 76 | 0.398027959  | 3747   | '11.3'    | grmzm2g156<br>729_t01 | 'lipid<br>metabolism.Phospholipi<br>d synthesis'                                |
| 233 | Chlb | 1 | 294652893 | 197.2197826 | 22 | -15.83957184 | 213077 | '29.3.3'  | grmzm2g448<br>523_t01 | 'protein.targeting.chlorop<br>last'                                             |

|     |      |   |           |             |    |              |        |           |                       |                                                                                    |
|-----|------|---|-----------|-------------|----|--------------|--------|-----------|-----------------------|------------------------------------------------------------------------------------|
| 234 | Chlb | 1 | 296022922 | 199.7554621 | 13 | 5.61697755   | 26029  | '29.2.5'  | grmzm2g304<br>638_t01 | 'protein.synthesis.release'                                                        |
| 235 | Chlb | 1 | 299894464 | 204.0221873 | 84 | 3.122396653  | 242700 | '31.1'    | grmzm2g160<br>578_t01 | 'cell.organisation'                                                                |
| 236 | Chlb | 2 | 5923229   | 18.30060959 | 6  | -0.432741117 | 86894  | '34.22'   | grmzm2g023<br>037_t01 | 'transport.cyclic<br>nucleotide or calcium<br>regulated channels'                  |
| 237 | Chlb | 2 | 6166067   | 18.83309554 | 9  | -0.313343721 | 10281  | '27.3.6'  | grmzm2g072<br>820_t01 | 'RNA.regulation of<br>transcription.bHLH,Basi<br>c Helix-Loop-Helix<br>family'     |
| 238 | Chlb | 2 | 69741938  | 75.18951102 | 10 | 0.13773773   | 87347  | '33.99'   | grmzm2g179<br>106_t01 | 'development.unspecifie<br>d'                                                      |
| 239 | Chlb | 2 | 148856409 | 80.60314611 | 22 | 8.071915262  | 27904  | '27.3.32' | grmzm2g400<br>559_t01 | 'RNA.regulation of<br>transcription.WRKY<br>domain transcription<br>factor family' |
| 240 | Chlb | 2 | 149429597 | 80.70039502 | 22 | -9.971712092 | 264303 | '29.4'    | grmzm2g153<br>675_t01 | 'protein.postranslational<br>modification'                                         |
| 241 | Chlb | 2 | 161877261 | 82.49985253 | 8  | -4.135727968 | 137361 | '28.1.3'  | grmzm2g442<br>555_t01 | 'DNA.synthesis/chromati<br>n structure.histone'                                    |
| 242 | Chlb | 2 | 172704855 | 85.0182288  | 5  | 0.153284287  | 102147 | '26.2'    | grmzm2g110<br>816_t01 | 'misc.UDP glucosyl and<br>glucuronyl transferases'                                 |
| 243 | Chlb | 2 | 185915577 | 96.74331495 | 10 | 0.145544258  | 45600  | '29.4'    | grmzm2g026<br>065_t01 | 'protein.postranslational<br>modification'                                         |

|     |      |   |           |             |    |              |                  |                       |                                                                               |
|-----|------|---|-----------|-------------|----|--------------|------------------|-----------------------|-------------------------------------------------------------------------------|
| 244 | Chlb | 2 | 186273082 | 97.1970181  | 7  | 0.137513277  | 18 '27.3.16'     | grmzm2g022<br>162_t01 | 'RNA.regulation of transcription.CCAAT box binding factor family, HAP5'       |
| 245 | Chlb | 2 | 186375668 | 97.32720814 | 5  | 0.150539465  | 132807 '20.2.1'  | grmzm2g112<br>165_t01 | 'stress.abiotic.heat'                                                         |
| 246 | Chlb | 2 | 191111571 | 102.3694697 | 8  | 0.135633799  | 12708 '9.9'      | grmzm2g530<br>263_t01 | 'mitochondrial electron transport / ATP synthesis.F1-ATPase'                  |
| 247 | Chlb | 2 | 192123634 | 103.2729858 | 11 | 0.120175148  | 64711 '31.1'     | grmzm2g015<br>395_t01 | 'cell.organisation'                                                           |
| 248 | Chlb | 3 | 139536229 | 63.68477456 | 6  | 0.147217046  | 131110 '27.3.25' | grmzm2g369<br>799_t01 | 'RNA.regulation of transcription.MYB domain transcription factor family'      |
| 249 | Chlb | 3 | 144468014 | 65.40015782 | 12 | 0.134612198  | 106582 '31.2'    | grmzm2g125<br>642_t01 | 'cell.division'                                                               |
| 250 | Chlb | 3 | 147011536 | 66.05909566 | 44 | 0.123495734  | 1717 '27.3.21'   | grmzm2g082<br>387_t01 | 'RNA.regulation of transcription.GRAS transcription factor family'            |
| 251 | Chlb | 3 | 148514014 | 66.58736723 | 21 | 0.148804648  | 157683 '11.5.2'  | grmzm2g155<br>348_t01 | 'lipid metabolism.glyceral metabolism.Glycerol-3-phosphate dehydrogenase (NAD |
| 252 | Chlb | 3 | 212765471 | 123.9963177 | 8  | -0.336927049 | 177172 '34.8'    | grmzm2g064<br>473_t01 | 'transport.metabolite transporters at the envelope membrane'                  |

|     |      |   |           |             |    |              |        |             |                       |                                                                                      |
|-----|------|---|-----------|-------------|----|--------------|--------|-------------|-----------------------|--------------------------------------------------------------------------------------|
| 253 | Chlb | 3 | 216243829 | 131.9068925 | 14 | -0.259823327 | 10027  | '26.2'      | grmzm2g053<br>047_t01 | 'misc.UDP glucosyl and<br>glucuronyl transferases'                                   |
| 254 | Chlb | 4 | 10192700  | 27.53975118 | 5  | -0.334206161 | 9760   | '27.3.99'   | grmzm2g068<br>331_t01 | 'RNA.regulation of<br>transcription.unclassified<br>'                                |
| 255 | Chlb | 4 | 10198136  | 27.55916751 | 33 | -0.283755098 | 4324   | '27.3.99'   | grmzm2g068<br>331_t01 | 'RNA.regulation of<br>transcription.unclassified<br>'                                |
| 256 | Chlb | 4 | 10624506  | 29.08207781 | 6  | -0.499306784 | 9304   | '20.1'      | grmzm2g426<br>306_t01 | 'stress.biotic'                                                                      |
| 257 | Chlb | 4 | 154415397 | 65.4507691  | 5  | -0.310092928 | 83660  | '31.1'      | grmzm2g137<br>029_t01 | 'cell.organisation'                                                                  |
| 258 | Chlb | 4 | 157107343 | 68.51092069 | 5  | -0.175013014 | 3155   | '31.4'      | grmzm2g054<br>354_t01 | 'cell.vesicle transport'                                                             |
| 259 | Chlb | 4 | 159175723 | 70.53286161 | 16 | -0.172099323 | 135692 | '29.4'      | grmzm2g110<br>483_t01 | 'protein.postranslational<br>modification'                                           |
| 260 | Chlb | 4 | 241996729 | 128.0064472 | 6  | 3.240118253  | 782    | '13.2.5.3'  | grmzm2g168<br>888_t13 | 'amino acid<br>metabolism.degradation.<br>serine-glycine-cysteine<br>group.cysteine' |
| 261 | Chlb | 4 | 242374367 | 129.5365429 | 7  | -2.331473365 | 95639  | '29.5.11.1' | grmzm2g118<br>637_t01 | 'protein.degradation.ubiq<br>uitin.ubiquitin'                                        |
| 262 | Chlb | 4 | 245553732 | 143.0029237 | 5  | 0.469486536  | 70     | '27.2'      | grmzm2g119<br>393_t01 | 'RNA.transcription'                                                                  |

|     |      |   |           |             |    |              |                                              |                                                                                    |
|-----|------|---|-----------|-------------|----|--------------|----------------------------------------------|------------------------------------------------------------------------------------|
| 263 | Chlb | 5 | 2383652   | 5.193426861 | 6  | -0.572992605 | '29.5.11. grmzm2g002<br>7015 2' 765_t02      | 'protein.degradation.ubiq<br>uitin.E1'                                             |
| 264 | Chlb | 5 | 6303981   | 23.51266789 | 6  | 0.790335738  | grmzm2g035<br>567 '27.3.11' 103_t01          | 'RNA.regulation of<br>transcription.C2H2 zinc<br>finger family'                    |
| 265 | Chlb | 5 | 20023828  | 50.73599959 | 10 | 0.15378392   | grmzm2g062<br>60 '29.5.7' 470_t01            | 'protein.degradation.met<br>alloprotease'                                          |
| 266 | Chlb | 5 | 26723660  | 54.83773092 | 24 | 0.136021297  | grmzm2g477<br>111423 '16.8.2' 683_t01        | 'secondary<br>metabolism.flavonoids.c<br>halcones'                                 |
| 267 | Chlb | 5 | 35357979  | 58.09472562 | 36 | 0.135646841  | '29.5.11. grmzm2g040<br>10704 4.3.2' 182_t01 | 'protein.degradation.ubiq<br>uitin.E3.SCF.FBOX'                                    |
| 268 | Chlb | 5 | 45813768  | 59.90312559 | 5  | 0.138663161  | grmzm2g148<br>37674 '27.3.99' 790_t01        | 'RNA.regulation of<br>transcription.unclassified<br>'                              |
| 269 | Chlb | 6 | 162877409 | 92.80071368 | 5  | 0.254136304  | grmzm2g025<br>22955 '17.4.1' 429_t01         | 'hormone<br>metabolism.cytokinin.sy<br>nthesis-degradation'                        |
| 270 | Chlb | 7 | 1921276   | 4.495740497 | 6  | 0.440671843  | grmzm2g018<br>2128 '27.3.32' 721_t01         | 'RNA.regulation of<br>transcription.WRKY<br>domain transcription<br>factor family' |
| 271 | Chlb | 7 | 2047654   | 4.972450239 | 9  | 0.308546552  | grmzm2g072<br>33568 '27.3.24' 582_t03        | 'RNA.regulation of<br>transcription.MADS box<br>transcription factor<br>family'    |

|     |      |   |           |             |    |              |        |                  |                       |                                                                                              |
|-----|------|---|-----------|-------------|----|--------------|--------|------------------|-----------------------|----------------------------------------------------------------------------------------------|
| 272 | Chlb | 7 | 5043354   | 21.45653923 | 59 | -0.623660171 | 31436  | '30.4.1'         | grmzm2g093<br>705_t01 | 'signalling.phosphinositi<br>des.phosphatidylinositol-<br>4-phosphate 5-kinase'              |
| 273 | Chlb | 7 | 5299542   | 22.83360349 | 5  | -0.725829344 | 130930 | '1.2.2'          | grmzm2g129<br>246_t01 | 'PS.photorespiration.glyc<br>olate oxydase'                                                  |
| 274 | Chlb | 7 | 6484300   | 28.48085938 | 7  | -0.385308166 | 259559 | '17.3.1.1<br>.1' | grmzm2g394<br>968_t01 | 'hormone<br>metabolism.brassinoster<br>oid.synthesis-<br>degradation.BRs.DET2'               |
| 275 | Chlb | 7 | 9145904   | 33.10358602 | 7  | -0.455155264 | 67440  | '27.3.17'        | grmzm2g153<br>754_t01 | 'RNA.regulation of<br>transcription.CPP(Zn),C<br>PP1-related transcription<br>factor family' |
| 276 | Chlb | 7 | 142898891 | 81.10232141 | 46 | -0.930589021 | 196    | '10.7'           | grmzm2g413<br>044_t01 | 'cell wall.modification'                                                                     |
| 277 | Chlb | 7 | 151513769 | 89.4065889  | 57 | 2.205527693  | 30683  | '23.2'           | grmzm2g036<br>007_t01 | 'nucleotide<br>metabolism.degradation'                                                       |
| 278 | Chlb | 7 | 152461246 | 91.18872855 | 6  | 0.1813481    | 3469   | '29.5.7'         | ac213455.3_f<br>gt008 | 'protein.degradation.met<br>alloprotease'                                                    |
| 279 | Chlb | 7 | 157011468 | 100.2121602 | 5  | -1.389177806 | 1872   | '17.2.3'         | grmzm2g053<br>338_t01 | 'hormone<br>metabolism.auxin.induce<br>d-regulated-responsive-<br>activated'                 |

|     |      |   |           |             |    |              |                  |                       |                                                              |
|-----|------|---|-----------|-------------|----|--------------|------------------|-----------------------|--------------------------------------------------------------|
| 280 | Chlb | 7 | 157185116 | 100.5721631 | 5  | -1.554880555 | 17355 '29.5.3'   | grmzm2g049<br>882_t01 | 'protein.degradation.cyst<br>eine protease'                  |
| 281 | Chlb | 7 | 157532548 | 101.2924508 | 11 | -1.522378582 | 299514 '27.4'    | grmzm2g068<br>255_t01 | 'RNA.RNA binding'                                            |
| 282 | Chlb | 7 | 164316372 | 116.7981854 | 5  | -0.786680562 | 2495 '28.2'      | grmzm2g356<br>894_t01 | 'DNA.repair'                                                 |
| 283 | Chlb | 7 | 167232557 | 126.3442442 | 8  | 0.152254886  | 131108 '3.8.2'   | grmzm2g053<br>554_t01 | 'minor CHO<br>metabolism.galactose.alp<br>ha-galactosidases' |
| 284 | Chlb | 7 | 167233412 | 126.3479602 | 14 | 0.1415427    | 130253 '3.8.2'   | grmzm2g053<br>554_t01 | 'minor CHO<br>metabolism.galactose.alp<br>ha-galactosidases' |
| 285 | Chlb | 8 | 926070    | 1.886736364 | 14 | 0.271650989  | 125736 '20.2.99' | grmzm2g103<br>512_t01 | 'stress.abiotic.unspecifie<br>d'                             |
| 286 | Chlb | 8 | 1359223   | 2.966202574 | 8  | 0.123826391  | 74396 '31.4'     | grmzm2g378<br>906_t01 | 'cell.vesicle transport'                                     |
| 287 | Chlb | 8 | 99959295  | 57.50014689 | 6  | -0.51065178  | 52151 '29.5.1'   | grmzm2g055<br>684_t01 | 'protein.degradation.subt<br>ilases'                         |
| 288 | Chlb | 8 | 147589704 | 77.10076187 | 7  | -0.197854431 | 91 '3.5'         | grmzm2g178<br>346_t01 | 'minor CHO<br>metabolism.others'                             |

|     |      |   |           |             |    |              |        |                    |                       |                                                                           |
|-----|------|---|-----------|-------------|----|--------------|--------|--------------------|-----------------------|---------------------------------------------------------------------------|
| 289 | Chlb | 8 | 147830284 | 77.29378758 | 5  | -0.28678081  | 79601  | '27.3.22'          | grmzm2g133<br>972_t01 | 'RNA.regulation of transcription.HB,Homeobox transcription factor family' |
| 290 | Chlb | 8 | 147830665 | 77.29409327 | 7  | -0.289989168 | 79220  | '27.3.22'          | grmzm2g133<br>972_t01 | 'RNA.regulation of transcription.HB,Homeobox transcription factor family' |
| 291 | Chlb | 8 | 152152815 | 80.797802   | 13 | -0.348119811 | 1266   | '27.3.25'          | grmzm2g003<br>406_t01 | 'RNA.regulation of transcription.MYB domain transcription factor family'  |
| 292 | Chlb | 9 | 8793952   | 12.87388515 | 8  | -0.136620476 | 5123   | '27.3.26'          | grmzm2g371<br>870_t01 | 'RNA.regulation of transcription.MYB-related transcription factor family' |
| 293 | Chlb | 9 | 9141388   | 13.42304955 | 6  | -0.254049865 | 134    | '33.99'            | grmzm2g088<br>053_t01 | 'development.unspecific d'                                                |
| 294 | Chlb | 9 | 23231768  | 40.03154801 | 10 | -0.113528991 | 206    | '27.3.27'          | grmzm2g171<br>395_t01 | 'RNA.regulation of transcription.NAC domain transcription factor family'  |
| 295 | Chlb | 9 | 25023438  | 42.41159442 | 6  | -0.114018927 | 16525  | '30.2.16'          | grmzm2g335<br>052_t01 | 'signalling.receptor kinases.Catharanthus roseus-like RLK1'               |
| 296 | Chlb | 9 | 27036374  | 43.61692207 | 7  | -0.146623845 | 1356   | '29.2.1.2<br>.2.9' | grmzm2g084<br>739_t01 | 'protein.synthesis.ribosomal protein.eukaryotic.60S subunit.L9'           |
| 297 | Chlb | 9 | 64396713  | 45.73393561 | 5  | -0.145382509 | 384975 | '27.3.15'          | grmzm2g121<br>897_t01 | 'RNA.regulation of transcription.CCAAT box binding factor family, HAP3'   |



|     |      |    |           |             |    |              |        |                 |                       |                                                                                                  |
|-----|------|----|-----------|-------------|----|--------------|--------|-----------------|-----------------------|--------------------------------------------------------------------------------------------------|
| 298 | Chlb | 9  | 74140456  | 45.9421654  | 15 | -2166.549455 | 504839 | '26.10'         | grmzm2g138<br>248_t01 | 'misc.cytochrome P450'                                                                           |
| 299 | Chlb | 9  | 85978653  | 46.6412055  | 5  | -0.164686897 | 50748  | '26.7'          | grmzm2g099<br>642_t01 | 'misc.oxidases - copper,<br>flavone etc.'                                                        |
| 300 | Chlb | 9  | 147213879 | 101.7957515 | 8  | -0.318295344 | 9973   | '29.4.1.5<br>7' | grmzm2g009<br>869_t01 | 'protein.postranslational<br>modification.kinase.rece<br>ptor like cytoplasmatic<br>kinase VII'  |
| 301 | Chlb | 10 | 107950213 | 44.02050592 | 22 | -0.311582186 | 96205  | '33.99'         | grmzm2g097<br>106_t01 | 'development.unspecifie<br>d'                                                                    |
| 302 | Chlb | 10 | 118129854 | 47.02366267 | 15 | -0.228236332 | 41877  | '27.3.6'        | grmzm2g355<br>469_t01 | 'RNA.regulation of<br>transcription.bHLH,Basi<br>c Helix-Loop-Helix<br>family'                   |
| 303 | Chlb | 10 | 119651031 | 47.40080838 | 7  | -0.115286868 | 5042   | '27.3.30'       | grmzm2g392<br>168_t01 | 'RNA.regulation of<br>transcription.Trihelix,<br>Triple-Helix<br>transcription factor<br>family' |
| 304 | Chlb | 10 | 129585091 | 52.11332474 | 32 | 0.256285226  | 47465  | '27.1.20'       | grmzm2g160<br>473_t01 | 'RNA.processing.degrad<br>ation dicer'                                                           |
| 305 | Chlb | 10 | 132147651 | 55.92474833 | 6  | 0.240383766  | 13545  | '26.2'          | grmzm2g468<br>661_t01 | 'misc.UDP glucosyl and<br>glucoronyl transferases'                                               |
| 306 | Chlb | 10 | 148943495 | 104.5936596 | 7  | -0.338495455 | 708    | '29.3.1'        | grmzm2g312<br>026_t01 | 'protein.targeting.nucleus<br>'                                                                  |
| 307 | Chlb | 10 | 149647673 | 108.5410404 | 6  | -0.456258788 |        |                 |                       |                                                                                                  |

|     |      |   |          |             |    |              |        |                 |                       |                                                                                                 |
|-----|------|---|----------|-------------|----|--------------|--------|-----------------|-----------------------|-------------------------------------------------------------------------------------------------|
| 308 | Fruc | 1 | 16386798 | 32.84963222 | 6  | -0.013777599 | 31095  | '29.4.1.5<br>7' | grmzm2g175<br>164_t01 | 'protein.postranslational<br>modification.kinase.rece<br>ptor like cytoplasmatic<br>kinase VII' |
| 309 | Fruc | 1 | 16770481 | 33.28017346 | 30 | -0.015750944 | 1673   | '11.1.10'       | grmzm2g445<br>602_t01 | 'lipid metabolism.FA<br>synthesis and FA<br>elongation.beta ketoacyl<br>CoA synthase'           |
| 310 | Fruc | 1 | 16775647 | 33.28405569 | 10 | -0.018370011 | 180133 | '26.7'          | grmzm2g000<br>427_t01 | 'misc.oxidases - copper,<br>flavone etc.'                                                       |
| 311 | Fruc | 1 | 17461111 | 33.79917927 | 6  | -0.014967229 | 105396 | '33.99'         | grmzm2g496<br>991_t01 | 'development.unspecifie<br>d'                                                                   |
| 312 | Fruc | 1 | 35272897 | 54.48195467 | 5  | -0.029642508 | 18679  | '20.1'          | grmzm2g030<br>422_t03 | 'stress.biotic'                                                                                 |
| 313 | Fruc | 1 | 44348772 | 60.58908186 | 7  | 0.029290518  | 6195   | '21.1'          | grmzm2g073<br>628_t01 | 'redox.thioredoxin'                                                                             |
| 314 | Fruc | 1 | 45121654 | 61.22096078 | 8  | 0.015684896  | 36601  | '30.4.4'        | grmzm2g114<br>354_t01 | 'signalling.phosphinositi<br>des.phosphoinositide<br>phospholipase C'                           |
| 315 | Fruc | 1 | 45567426 | 61.52614689 | 14 | 0.019975229  | 19220  | '29.4'          | grmzm2g459<br>824_t01 | 'protein.postranslational<br>modification'                                                      |
| 316 | Fruc | 1 | 46712396 | 62.60179969 | 5  | 0.013786727  | 40891  | '27.1.1'        | grmzm2g153<br>450_t01 | 'RNA.processing.splicin<br>g'                                                                   |

|          |   |          |             |    |              |                 |                       |                                                                        |
|----------|---|----------|-------------|----|--------------|-----------------|-----------------------|------------------------------------------------------------------------|
| 317 Fruc | 1 | 57438776 | 70.59917107 | 14 | 0.013567425  | 120153 '30.11'  | grmzm2g158<br>662_t01 | 'signalling.light'                                                     |
| 318 Fruc | 1 | 95550141 | 86.84633266 | 14 | 0.034688611  | 152072 '29.2.3' | grmzm2g174<br>757_t01 | 'protein.synthesis.initiation'                                         |
| 319 Fruc | 2 | 3327524  | 8.176087352 | 9  | -0.011446215 | 26628 '31.3'    | grmzm2g047<br>590_t02 | 'cell.cycle'                                                           |
| 320 Fruc | 2 | 3529245  | 9.556599097 | 7  | -0.011598842 | 14938 '16.8.3'  | grmzm2g062<br>396_t01 | 'secondary<br>metabolism.flavonoids.dihydroflavonols'                  |
| 321 Fruc | 2 | 3534327  | 9.591591385 | 10 | -0.012952906 | 9856 '16.8.3'   | grmzm2g062<br>396_t01 | 'secondary<br>metabolism.flavonoids.dihydroflavonols'                  |
| 322 Fruc | 2 | 3794582  | 10.51648703 | 20 | -0.013392911 | 51935 '34.16'   | grmzm2g087<br>201_t01 | 'transport.ABC<br>transporters and<br>multidrug resistance<br>systems' |
| 323 Fruc | 2 | 4042572  | 11.15390606 | 18 | -0.012020005 | 104796 '1.3.13' | grmzm2g039<br>345_t01 | 'PS.calvin cycle.rubisco<br>interacting'                               |

|     |      |   |           |             |    |              |        |                 |                       |                                                                                                        |
|-----|------|---|-----------|-------------|----|--------------|--------|-----------------|-----------------------|--------------------------------------------------------------------------------------------------------|
| 324 | Fruc | 2 | 4663012   | 13.34691454 | 5  | -0.011982641 | 12041  | '30.11.1'       | grmzm2g086<br>801_t01 | 'signalling.light.COP9<br>signalosome'                                                                 |
| 325 | Fruc | 2 | 34001062  | 63.56397414 | 5  | -0.011897479 | 1995   | '20.1'          | grmzm2g052<br>175_t01 | 'stress.biotic'<br>'RNA.regulation of<br>transcription.bHLH,Basi<br>c Helix-Loop-Helix<br>family'      |
| 326 | Fruc | 2 | 177151781 | 87.86279241 | 10 | 0.034341476  | 103361 | '27.3.6'        | grmzm2g176<br>141_t01 | 'protein.postranslational<br>modification'                                                             |
| 327 | Fruc | 2 | 177266143 | 87.95845923 | 6  | 0.046944656  | 358444 | '29.4'          | grmzm2g330<br>049_t01 | 'misc.cytochrome P450'<br>'RNA.regulation of<br>transcription.Global<br>transcription factor<br>group' |
| 328 | Fruc | 2 | 181271307 | 91.1333845  | 7  | 0.046476341  | 81868  | '26.10'         | grmzm2g125<br>482_t01 | 'hormone<br>metabolism.gibberelin.sy<br>nthesis-degradation.GA2<br>oxidase'                            |
| 329 | Fruc | 3 | 3386685   | 11.10786166 | 29 | -0.021944149 | 16649  | '27.3.52'       | grmzm2g400<br>907_t02 | 'protein.postranslational<br>modification'                                                             |
| 330 | Fruc | 3 | 3903533   | 13.78234035 | 18 | -0.016091322 | 39286  | '17.6.1.1<br>3' | grmzm2g031<br>432_t01 | 'protein.postranslational<br>modification'                                                             |
| 331 | Fruc | 3 | 4856540   | 18.3470876  | 47 | -0.014548164 | 95949  | '29.4'          | grmzm2g477<br>073_t01 | 'protein.postranslational<br>modification'                                                             |

|     |      |   |           |             |    |              |        |            |                       |                                                                                     |
|-----|------|---|-----------|-------------|----|--------------|--------|------------|-----------------------|-------------------------------------------------------------------------------------|
| 332 | Fruc | 3 | 49918968  | 56.54435347 | 26 | -0.016411713 | 285685 | '29.4'     | grmzm2g170<br>120_t01 | 'protein.postranslational<br>modification'                                          |
| 333 | Fruc | 3 | 171723196 | 82.25684086 | 47 | 0.040642762  | 1961   | '1.2.5'    | grmzm2g452<br>630_t01 | 'PS.photorespiration.serine<br>hydroxymethyltransferase'                            |
| 334 | Fruc | 3 | 172148591 | 82.5754152  | 7  | 0.064075885  | 1267   | '23.1.2.1' | grmzm2g339<br>699_t01 | 'nucleotide<br>metabolism.synthesis.purine.amidophosphoribosyl<br>transferase'      |
| 335 | Fruc | 3 | 173110658 | 83.38629476 | 18 | 0.042818427  | 8042   | '29.4'     | grmzm2g110<br>922_t01 | 'protein.postranslational<br>modification'                                          |
| 336 | Fruc | 3 | 173219900 | 83.47836954 | 11 | 0.066010087  | 452174 | '31.4'     | grmzm2g439<br>532_t01 | 'cell.vesicle transport'                                                            |
| 337 | Fruc | 3 | 195593529 | 103.3189453 | 7  | 0.02012706   | 2132   | '27.3.22'  | grmzm2g314<br>546_t01 | 'RNA.regulation of<br>transcription.HB,Homeo<br>box transcription factor<br>family' |
| 338 | Fruc | 3 | 196183579 | 103.6950757 | 5  | 0.011501099  | 3318   | '3.2.3'    | grmzm2g123<br>277_t01 | 'minor CHO<br>metabolism.trehalose.potential TPS/TPP'                               |

|     |      |   |           |             |    |              |                            |                       |                                                                                                |
|-----|------|---|-----------|-------------|----|--------------|----------------------------|-----------------------|------------------------------------------------------------------------------------------------|
| 339 | Fruc | 3 | 219127882 | 135.874024  | 20 | -0.018693012 | '29.4.1.5<br>351 9'        | grmzm2g070<br>961_t01 | 'protein.postranslational<br>modification.kinase.rece<br>ptor like cytoplasmatic<br>kinase IX' |
| 340 | Fruc | 3 | 221010928 | 139.3762734 | 18 | -0.017339804 | 8058 '10.5.3'              | grmzm2g333<br>811_t01 | 'cell wall.cell wall<br>proteins.LRR'                                                          |
| 341 | Fruc | 4 | 596627    | 2.14232426  | 45 | 0.025189271  | 12789 '27.3.11'            | grmzm2g058<br>868_t01 | 'RNA.regulation of<br>transcription.C2H2 zinc<br>finger family'                                |
| 342 | Fruc | 4 | 101026208 | 57.83942086 | 5  | -0.028462957 | 783882 '27.3.73'           | ac207890.3_f<br>gt002 | 'RNA.regulation of<br>transcription.Zn-<br>finger(CCHC)'                                       |
| 343 | Fruc | 4 | 109554972 | 58.01578487 | 6  | -0.014600631 | 734976 '29.2.1.2<br>.2.14' | grmzm2g323<br>971_t01 | 'protein.synthesis.riboso<br>mal<br>protein.eukaryotic.60S<br>subunit.L14'                     |
| 344 | Fruc | 4 | 118225032 | 58.20188033 | 8  | -0.015380681 | 55874 '27.3.67'            | grmzm2g009<br>019_t02 | 'RNA.regulation of<br>transcription.putative<br>transcription regulator'                       |
| 345 | Fruc | 4 | 121592260 | 58.27415502 | 6  | -0.012488902 | 93412 '27.3.99'            | grmzm2g069<br>678_t01 | 'RNA.regulation of<br>transcription.unclassified<br>'                                          |
| 346 | Fruc | 4 | 121913511 | 58.2810504  | 6  | -0.014513129 | '29.5.11.<br>87386 4.2'    | grmzm2g041<br>344_t01 | 'protein.degradation.ubiq<br>uitin.E3.RING'                                                    |
| 347 | Fruc | 4 | 122028538 | 58.28351935 | 8  | -0.012822806 | 118962 '18.3.1'            | grmzm2g156<br>803_t01 | 'Co-factor and vitamine<br>metabolism.riboflavin.G<br>TP cyclohydrolase II'                    |

|     |      |   |           |             |    |              |        |                  |                       |                                                                                                 |
|-----|------|---|-----------|-------------|----|--------------|--------|------------------|-----------------------|-------------------------------------------------------------------------------------------------|
| 348 | Fruc | 4 | 125159697 | 58.42149244 | 5  | -0.016269091 | 124040 | '31.1'           | grmzm2g145<br>027_t01 | 'cell.organisation'                                                                             |
| 349 | Fruc | 4 | 139805548 | 59.87084184 | 6  | -0.013396769 | 14614  | '27.3.66'        | grmzm2g020<br>081_t01 | 'RNA.regulation of<br>transcription.Psudo ARR<br>transcription factor<br>family'                |
| 350 | Fruc | 4 | 144536877 | 60.82876771 | 5  | -0.01193395  | 142969 | '16.5.1.3<br>.3' | grmzm2g111<br>225_t01 | 'secondary<br>metabolism.sulfur-<br>containing.glucosinolate<br>s.degradation.nitrilase'        |
| 351 | Fruc | 4 | 170738228 | 78.91944426 | 9  | -0.027117788 | 17917  | '29.4.1.5<br>7'  | grmzm2g102<br>163_t01 | 'protein.postranslational<br>modification.kinase.rece<br>ptor like cytoplasmatic<br>kinase VII' |
| 352 | Fruc | 4 | 172300218 | 81.59892215 | 15 | -0.0185491   | 585    | '31.4'           | grmzm2g054<br>210_t01 | 'cell.vesicle transport'                                                                        |
| 353 | Fruc | 4 | 240477479 | 123.4579602 | 5  | -0.05014372  | 27533  | '28.2'           | grmzm2g143<br>462_t01 | 'DNA.repair'                                                                                    |
| 354 | Fruc | 5 | 1571929   | 2.012971503 | 16 | -0.012617453 | 1299   | '17.2.1'         | grmzm2g125<br>552_t01 | 'hormone<br>metabolism.auxin.synthe<br>sis-degradation'                                         |
| 355 | Fruc | 5 | 2279196   | 4.510973125 | 8  | -0.011842701 | 8268   | '29.4.1.5<br>7'  | grmzm2g144<br>042_t01 | 'protein.postranslational<br>modification.kinase.rece<br>ptor like cytoplasmatic<br>kinase VII' |

|     |      |   |           |             |    |              |        |           |                       |                                                                                  |
|-----|------|---|-----------|-------------|----|--------------|--------|-----------|-----------------------|----------------------------------------------------------------------------------|
| 356 | Fruc | 5 | 2358292   | 5.027739617 | 38 | -0.013396885 | 3764   | '27.3.67' | grmzm2g003<br>068_t01 | 'RNA.regulation of<br>transcription.putative<br>transcription regulator'         |
| 357 | Fruc | 5 | 2367917   | 5.090623676 | 8  | -0.012236849 | 1502   | '27.3.11' | grmzm2g002<br>815_t01 | 'RNA.regulation of<br>transcription.C2H2 zinc<br>finger family'                  |
| 358 | Fruc | 5 | 163819573 | 76.76334725 | 49 | 0.022715483  | 1736   | '17.2.3'  | grmzm2g312<br>274_t01 | 'hormone<br>metabolism.auxin.induce<br>d-regulated-responsive-<br>activated'     |
| 359 | Fruc | 5 | 166171297 | 78.20073394 | 5  | 0.023811543  | 88984  | '27.3.11' | grmzm2g320<br>287_t01 | 'RNA.regulation of<br>transcription.C2H2 zinc<br>finger family'                  |
| 360 | Fruc | 5 | 204526436 | 116.1640652 | 41 | 0.018975985  | 1242   | '10.6.1'  | grmzm2g151<br>257_t01 | 'cell<br>wall.degradation.cellulas<br>es and beta -1,4-<br>glucanases'           |
| 361 | Fruc | 5 | 206993797 | 123.8406652 | 29 | 0.022620899  | 7780   | '33.99'   | grmzm2g036<br>286_t01 | 'development.unspecifie<br>d'                                                    |
| 362 | Fruc | 5 | 210780527 | 134.226701  | 7  | 0.0157951    | 163946 | '27.3.67' | grmzm2g049<br>194_t01 | 'RNA.regulation of<br>transcription.putative<br>transcription regulator'         |
| 363 | Fruc | 5 | 214945363 | 152.2635928 | 8  | 0.024738523  | 45426  | '21.1'    | grmzm2g003<br>028_t01 | 'redox.thioredoxin'                                                              |
| 364 | Fruc | 6 | 83413352  | 12.31842953 | 47 | -0.016984936 | 100890 | '20.2.3'  | grmzm2g387<br>935_t01 | 'stress.abiotic.drought/sal<br>t'                                                |
| 365 | Fruc | 6 | 93728026  | 20.25312295 | 19 | -0.018294395 | 2352   | '27.3.16' | grmzm2g161<br>680_t01 | 'RNA.regulation of<br>transcription.CCAAT<br>box binding factor<br>family, HAP5' |
| 366 | Fruc | 6 | 117587976 | 42.56198959 | 5  | -0.03397919  | 221907 | '27.3.11' | grmzm2g435<br>357_t01 | 'RNA.regulation of<br>transcription.C2H2 zinc<br>finger family'                  |



|          |   |           |             |    |              |                 |                       |                                                                          |
|----------|---|-----------|-------------|----|--------------|-----------------|-----------------------|--------------------------------------------------------------------------|
| 367 Fruc | 6 | 119772986 | 44.24786955 | 23 | -0.033796984 | 121392 '30.1'   | grmzm2g162<br>788_t01 | 'signalling.in sugar and<br>nutrient physiology'                         |
| 368 Fruc | 6 | 124203584 | 45.80014821 | 9  | -0.025280441 | 191623 '11.8'   | grmzm2g003<br>064_t01 | 'lipid<br>metabolism."exotics"<br>(steroids, squalene etc)'              |
| 369 Fruc | 6 | 128598095 | 47.52042761 | 5  | -0.033664993 | 96115 '26.2'    | grmzm2g458<br>776_t01 | 'misc.UDP glucosyl and<br>glucoronyl transferases'                       |
| 370 Fruc | 6 | 165119716 | 101.3985908 | 6  | 0.036582506  | 66369 '27.3.67' | grmzm2g128<br>579_t03 | 'RNA.regulation of<br>transcription.putative<br>transcription regulator' |
| 371 Fruc | 6 | 166794282 | 106.9690738 | 8  | -0.011678556 | 111528 '26.4'   | grmzm2g163<br>883_t01 | 'misc.beta 1,3 glucan<br>hydrolases'                                     |
| 372 Fruc | 6 | 166794417 | 106.9695432 | 5  | -0.01610415  | 111393 '26.4'   | grmzm2g163<br>883_t01 | 'misc.beta 1,3 glucan<br>hydrolases'                                     |

|     |      |   |           |             |    |              |                     |                       |                                                                                       |
|-----|------|---|-----------|-------------|----|--------------|---------------------|-----------------------|---------------------------------------------------------------------------------------|
| 373 | Fruc | 7 | 6022883   | 26.56544125 | 7  | -0.013079036 | '29.5.11.13738 4.2' | grmzm2g029<br>623_t01 | 'protein.degradation.ubiquitin.E3.RING'                                               |
| 374 | Fruc | 7 | 9213492   | 33.2209742  | 16 | -0.018141284 | 13304 '10.5.3'      | grmzm2g153<br>741_t01 | 'cell.wall.cell wall proteins.LRR'                                                    |
| 375 | Fruc | 7 | 20233795  | 44.69829015 | 10 | -0.017981407 | 2989 '27.3.69'      | ac233961.1_f<br>gt001 | 'RNA.regulation of transcription.SET-domain transcriptional regulator family'         |
| 376 | Fruc | 7 | 21622999  | 45.56317348 | 15 | -0.018042126 | 135788 '34.12'      | grmzm2g093<br>276_t01 | 'transport.metal'                                                                     |
| 377 | Fruc | 7 | 32630669  | 47.75472755 | 8  | -0.017704491 | 3614 '31.3.1'       | grmzm2g092<br>072_t01 | 'cell.cycle.peptidylprolyl isomerase'                                                 |
| 378 | Fruc | 7 | 84574592  | 49.92029539 | 9  | -0.01885016  | 15252 '31.4'        | grmzm2g360<br>648_t01 | 'cell.vesicle transport'                                                              |
| 379 | Fruc | 7 | 86294238  | 49.99529999 | 25 | -0.016277961 | '29.4.1.5 102855 7' | grmzm2g132<br>184_t01 | 'protein.postranslational modification.kinase.receptor like cytoplasmatic kinase VII' |
| 380 | Fruc | 7 | 86760483  | 50.01070124 | 5  | -0.018393153 | 31870 '9.9'         | grmzm2g405<br>751_t01 | 'mitochondrial electron transport / ATP synthesis.F1-ATPase'                          |
| 381 | Fruc | 7 | 95364029  | 50.42762301 | 14 | -0.019020479 | 977 '34.99'         | grmzm2g176<br>721_t01 | 'transport.misc'                                                                      |
| 382 | Fruc | 7 | 109178008 | 55.19093714 | 5  | -0.016770261 | 409274 '30.5'       | grmzm2g015<br>349_t01 | 'signalling.G-proteins'                                                               |

|     |      |   |           |              |    |              |        |                     |                       |                                                                                   |
|-----|------|---|-----------|--------------|----|--------------|--------|---------------------|-----------------------|-----------------------------------------------------------------------------------|
| 383 | Fruc | 7 | 156688517 | 99.54262593  | 5  | 0.025852571  | 50626  | '26.22'             | grmzm2g076<br>981_t02 | 'misc.short chain<br>dehydrogenase/reductase<br>(SDR)'                            |
| 384 | Fruc | 9 | 2701441   | -3.388186607 | 10 | -0.03407797  | 6507   | '27.2'              | grmzm2g180<br>836_t01 | 'RNA.transcription'                                                               |
| 385 | Fruc | 9 | 5619750   | 4.494331447  | 5  | -0.026190353 | 334395 | '28.1'              | grmzm2g093<br>772_t01 | 'DNA.synthesis/chromati<br>n structure'                                           |
| 386 | Fruc | 9 | 9558874   | 14.08293641  | 31 | -0.038288541 | 100236 | '27.3.25'           | grmzm2g005<br>066_t01 | 'RNA.regulation of<br>transcription.MYB<br>domain transcription<br>factor family' |
| 387 | Fruc | 9 | 10186494  | 15.44407336  | 7  | -0.018017282 | 49289  | '29.2.1.2<br>.1.17' | grmzm2g086<br>906_t01 | 'protein.synthesis.riboso<br>mal<br>protein.eukaryotic.40S<br>subunit.S17'        |
| 388 | Fruc | 9 | 21993322  | 38.82079896  | 27 | -0.037006124 | 45016  | '4.1.13'            | grmzm2g064<br>302_t01 | 'glycolysis.cytosolic<br>branch.enolase'                                          |
| 389 | Fruc | 9 | 142204786 | 87.72532368  | 30 | -0.022131324 | 52062  | '29.1.10'           | grmzm2g143<br>450_t01 | 'protein.aa<br>activation.methionine-<br>tRNA ligase'                             |
| 390 | Fruc | 9 | 143828279 | 91.48003191  | 5  | -0.020830478 | 184852 | '33.1'              | grmzm2g078<br>441_t01 | 'development.storage<br>proteins'                                                 |
| 391 | Fruc | 9 | 145268207 | 95.10905936  | 8  | -0.014832567 | 10980  | '27.3.6'            | ac233899.1_f<br>gt002 | 'RNA.regulation of<br>transcription.bHLH,Basi<br>c Helix-Loop-Helix<br>family'    |

|     |      |    |           |             |    |              |                        |                       |                                                                                                                        |
|-----|------|----|-----------|-------------|----|--------------|------------------------|-----------------------|------------------------------------------------------------------------------------------------------------------------|
| 392 | Fruc | 10 | 5058530   | 14.79019912 | 28 | -0.045641719 | 56738 '30.2.26'        | grmzm2g051<br>637_t01 | 'signalling.receptor<br>kinases.crinkly like'                                                                          |
|     |      |    |           |             |    |              |                        |                       | 'amino acid<br>metabolism.synthesis.asp<br>artate                                                                      |
| 393 | Fruc | 10 | 5258877   | 16.0525304  | 31 | -0.045423584 | 1765 '13.1.3.5<br>.5'  | grmzm2g020<br>446_t01 | 'family.lysine.diaminopi<br>melate decarboxylase'                                                                      |
| 394 | Fruc | 10 | 5571203   | 17.95328644 | 17 | -0.045237542 | 119768 '34.3'          | ac207755.3_f<br>gt005 | 'transport.amino acids'                                                                                                |
| 395 | Fruc | 10 | 11480453  | 29.34116571 | 8  | -0.038039626 | 1754 '3.4.3'           | grmzm2g392<br>513_t01 | 'minor CHO<br>metabolism.myo-<br>inositol.InsP Synthases'                                                              |
| 396 | Fruc | 10 | 134630447 | 59.4071156  | 7  | -0.017295414 | 15764 '26.2'           | grmzm2g031<br>453_t01 | 'misc.UDP glucosyl and<br>glucoronyl transferases'                                                                     |
| 397 | Fuma | 1  | 195285519 | 108.2877857 | 22 | 0.010497833  | 138707 '27.3.7'        | grmzm2g159<br>996_t01 | 'RNA.regulation of<br>transcription.C2C2(Zn)<br>CO-like, Constans-like<br>zinc finger family'                          |
| 398 | Fuma | 1  | 195634638 | 108.6089505 | 6  | 0.010552372  | 5641 '27.3.3'          | grmzm2g080<br>565_t01 | 'RNA.regulation of<br>transcription.AP2/EREB<br>P, APETALA2/Ethylene-<br>responsive element<br>binding protein family' |
| 399 | Fuma | 1  | 196048817 | 109.0223788 | 6  | 0.007421199  | 7116 '29.5.11.<br>4.2' | grmzm2g053<br>027_t01 | 'protein.degradation.ubiq<br>uitin.E3.RING'                                                                            |

|          |   |           |             |    |              |        |                   |                       |                                                                        |
|----------|---|-----------|-------------|----|--------------|--------|-------------------|-----------------------|------------------------------------------------------------------------|
| 400 Fuma | 1 | 205544235 | 117.795721  | 14 | -0.006686224 | 36816  | '10.6.3'          | grmzm2g154<br>124_t01 | 'cell<br>wall.degradation.pectate<br>lyases and<br>polygalacturonases' |
| 401 Fuma | 1 | 205766088 | 118.0094361 | 13 | -0.004995746 | 122379 | '29.5.11.<br>4.2' | grmzm2g112<br>617_t01 | 'protein.degradation.ubiq<br>uitin.E3.RING'                            |
| 402 Fuma | 1 | 206425614 | 118.6447696 | 17 | -0.005436419 | 20336  | '20.1'            | grmzm2g049<br>057_t01 | 'stress.biotic'                                                        |
| 403 Fuma | 1 | 207121477 | 119.3151072 | 6  | -0.00753724  | 153863 | '20.2.99'         | grmzm2g363<br>004_t01 | 'stress.abiotic.unspecifie<br>d'                                       |
| 404 Fuma | 1 | 208533778 | 120.6233059 | 7  | -0.007359341 | 2238   | '20.2.1'          | grmzm2g059<br>502_t02 | 'stress.abiotic.heat'                                                  |
| 405 Fuma | 1 | 208593470 | 120.672802  | 13 | -0.004806602 | 39346  | '2.2.2.6'         | grmzm2g053<br>037_t01 | 'major CHO<br>metabolism.degradation.<br>starch.transporter'           |
| 406 Fuma | 1 | 272244444 | 164.542002  | 10 | 0.003610726  | 67225  | '20.1'            | grmzm2g481<br>194_t01 | 'stress.biotic'                                                        |
| 407 Fuma | 1 | 272244581 | 164.5421084 | 19 | 0.003781599  | 67088  | '20.1'            | grmzm2g481<br>194_t01 | 'stress.biotic'                                                        |
| 408 Fuma | 1 | 289899574 | 186.9723092 | 6  | 0.002963805  | 2798   | '27.3.99'         | grmzm2g077<br>079_t01 | 'RNA.regulation of<br>transcription.unclassified<br>'                  |

|          |   |           |             |   |              |                            |                       |                                                                                                          |
|----------|---|-----------|-------------|---|--------------|----------------------------|-----------------------|----------------------------------------------------------------------------------------------------------|
| 409 Fuma | 2 | 5934701   | 18.32576495 | 5 | 0.014046764  | 75422 '34.22'              | grmzm2g023<br>037_t01 | 'transport.cyclic<br>nucleotide or calcium<br>regulated channels'                                        |
| 410 Fuma | 2 | 26788878  | 58.0564637  | 8 | -0.007537765 | 7474 '16.2'                | grmzm2g362<br>413_t01 | 'secondary<br>metabolism.phenylpropa<br>noids'                                                           |
| 411 Fuma | 2 | 40887517  | 67.93546257 | 5 | -0.004119967 | 71254 '30.2.99'            | grmzm2g179<br>268_t01 | 'signalling.receptor<br>kinases.misc'                                                                    |
| 412 Fuma | 2 | 101178551 | 76.43228188 | 6 | -0.003508264 | '29.4.1.5<br>87613 7'      | grmzm2g463<br>227_t01 | 'protein.postranslational<br>modification.kinase.rece<br>ptor like cytoplasmatic<br>kinase VII'          |
| 413 Fuma | 2 | 126037868 | 77.45026254 | 6 | -0.002840198 | 134222 '23.4.10'           | grmzm2g001<br>524_t01 | 'nucleotide<br>metabolism.phosphotran<br>sfer and<br>pyrophosphatases.nucleo<br>side diphosphate kinase' |
| 414 Fuma | 2 | 126357762 | 77.49091538 | 7 | -0.003825335 | 180624 '20.2.5'            | grmzm2g046<br>498_t01 | 'stress.abiotic.light'                                                                                   |
| 415 Fuma | 2 | 128572754 | 77.77240149 | 5 | 0.006664527  | 732083 '29.4'              | grmzm2g416<br>491_t01 | 'protein.postranslational<br>modification'                                                               |
| 416 Fuma | 2 | 140085774 | 79.23550166 | 9 | -0.003129574 | '29.5.11.<br>177394 4.3.2' | grmzm2g348<br>855_t01 | 'protein.degradation.ubiq<br>uitin.E3.SCF.FBOX'                                                          |
| 417 Fuma | 2 | 209368892 | 120.1686122 | 5 | -0.003179256 | 84219 '3.2.2'              | grmzm2g117<br>564_t01 | 'minor CHO<br>metabolism.trehalose.TP<br>P'                                                              |

|          |   |           |             |    |              |                           |                       |                                                                                   |
|----------|---|-----------|-------------|----|--------------|---------------------------|-----------------------|-----------------------------------------------------------------------------------|
| 418 Fuma | 2 | 210076932 | 121.1450848 | 6  | -0.005447489 | 52801 '27.3.25'           | grmzm2g703<br>373_t01 | 'RNA.regulation of<br>transcription.MYB<br>domain transcription<br>factor family' |
| 419 Fuma | 3 | 27871359  | 53.36404037 | 8  | -0.003866516 | 37203 '34.19.3'           | grmzm2g103<br>214_t01 | 'transport.Major Intrinsic<br>Proteins.NIP'                                       |
| 420 Fuma | 3 | 223869464 | 146.0056611 | 18 | 0.010366321  | 89641 '21.1'              | grmzm2g093<br>436_t01 | 'redox.thioredoxin'                                                               |
| 421 Fuma | 3 | 223869468 | 146.0056712 | 5  | 0.01094552   | 89637 '21.1'              | grmzm2g093<br>436_t01 | 'redox.thioredoxin'                                                               |
| 422 Fuma | 4 | 3544388   | 12.18913098 | 8  | -0.013932612 | 1313 '13.2.6.2'           | grmzm2g006<br>480_t01 | 'amino acid<br>metabolism.degradation.<br>aromatic aa.tyrosine'                   |
| 423 Fuma | 4 | 4653906   | 15.97068346 | 12 | -0.008852558 | 11307 '29.2.1.2<br>.2.57' | grmzm2g089<br>830_t01 | 'protein.synthesis.riboso<br>mal<br>protein.eukaryotic.60S<br>subunit.L7A'        |
| 424 Fuma | 4 | 4655407   | 15.97579929 | 7  | -0.008673224 | 9806 '29.2.1.2<br>.2.57'  | grmzm2g089<br>830_t01 | 'protein.synthesis.riboso<br>mal<br>protein.eukaryotic.60S<br>subunit.L7A'        |
| 425 Fuma | 4 | 168642940 | 76.90973825 | 5  | -0.005552603 | 1660 '27.3.67'            | grmzm2g123<br>887_t01 | 'RNA.regulation of<br>transcription.putative<br>transcription regulator'          |
| 426 Fuma | 4 | 177728199 | 89.41877612 | 10 | -0.003560153 | 11473 '10.3'              | grmzm2g015<br>983_t01 | 'cell wall.hemicellulose<br>synthesis'                                            |

|          |   |           |             |    |              |                 |                                 |                                                                            |
|----------|---|-----------|-------------|----|--------------|-----------------|---------------------------------|----------------------------------------------------------------------------|
| 427 Fuma | 4 | 177733636 | 89.446853   | 10 | -0.002949415 | 6036 '10.3'     | grmzm2g015<br>983_t01           | 'cell wall.hemicellulose<br>synthesis'                                     |
| 428 Fuma | 4 | 179860377 | 92.79034271 | 8  | -0.003276803 | 111398 '3.2.2'  | grmzm2g151<br>044_t01           | 'minor CHO<br>metabolism.trehalose.TP<br>P'                                |
| 429 Fuma | 4 | 180517470 | 93.4957277  | 5  | -0.002716131 | 96128 '16.10'   | grmzm2g169<br>033_t01           | 'secondary<br>metabolism.simple<br>phenols'                                |
| 430 Fuma | 4 | 182201693 | 95.89453425 | 8  | -0.004834603 | 78924 '30.2.99' | grmzm2g091<br>632_t02           | 'signalling.receptor<br>kinases.misc'                                      |
| 431 Fuma | 4 | 182528229 | 96.35961321 | 8  | -0.003345301 | 132850 '15.2'   | grmzm2g325<br>575_t01           | 'metal handling.binding,<br>chelation and storage'                         |
| 432 Fuma | 4 | 182976299 | 96.99779073 | 7  | -0.002979929 | 28429 '26.12'   | ac197758.3_f<br>gt004           | 'misc.peroxidases'                                                         |
| 433 Fuma | 4 | 230346458 | 113.6832878 | 23 | 0.006178358  | 84704 '30.3'    | grmzm2g085<br>022_t01           | 'signalling.calcium'                                                       |
| 434 Fuma | 4 | 234235715 | 115.012717  | 20 | 0.005063297  | 10161 '.2.11'   | '29.2.1.2 grmzm2g018<br>770_t01 | 'protein.synthesis.riboso<br>mal<br>protein.eukaryotic.60S<br>subunit.L11' |



|          |   |           |             |    |              |                 |                       |                                                                                   |
|----------|---|-----------|-------------|----|--------------|-----------------|-----------------------|-----------------------------------------------------------------------------------|
| 435 Fuma | 4 | 244607562 | 137.8307023 | 33 | -0.006210745 | 5287 '27.3.35'  | grmzm2g019<br>106_t01 | 'RNA.regulation of<br>transcription.bZIP<br>transcription factor<br>family'       |
| 436 Fuma | 5 | 6670422   | 24.85176321 | 8  | 0.008168665  | 66746 '26.2'    | grmzm2g030<br>821_t01 | 'misc.UDP glucosyl and<br>glucuronyl transferases'                                |
| 437 Fuma | 5 | 6828578   | 25.41836288 | 5  | 0.002267897  | 9656 '34.16'    | grmzm2g072<br>071_t01 | 'transport.ABC<br>transporters and<br>multidrug resistance<br>systems'            |
| 438 Fuma | 5 | 7550141   | 28.65678582 | 8  | 0.004885718  | 16933 '29.4'    | grmzm2g014<br>618_t01 | 'protein.postranslational<br>modification'                                        |
| 439 Fuma | 5 | 9280217   | 30.80111555 | 6  | 0.003874816  | 45660 '20.2.3'  | grmzm2g164<br>470_t01 | 'stress.abiotic.drought/sal<br>t'                                                 |
| 440 Fuma | 5 | 10073594  | 32.64114173 | 7  | 0.003647227  | 53346 '27.3.25' | grmzm2g455<br>869_t01 | 'RNA.regulation of<br>transcription.MYB<br>domain transcription<br>factor family' |
| 441 Fuma | 5 | 10073765  | 32.64153832 | 28 | 0.003494537  | 53175 '27.3.25' | grmzm2g455<br>869_t01 | 'RNA.regulation of<br>transcription.MYB<br>domain transcription<br>factor family' |
| 442 Fuma | 5 | 10085671  | 32.66915111 | 5  | 0.00489814   | 41269 '27.3.25' | grmzm2g455<br>869_t01 | 'RNA.regulation of<br>transcription.MYB<br>domain transcription<br>factor family' |
| 443 Fuma | 6 | 165445511 | 102.4790375 | 8  | -0.005808279 | 1687 '3.5'      | grmzm2g011<br>662_t01 | 'minor CHO<br>metabolism.others'                                                  |

|          |   |           |             |    |              |                   |                       |                                                                         |
|----------|---|-----------|-------------|----|--------------|-------------------|-----------------------|-------------------------------------------------------------------------|
| 444 Fuma | 7 | 57117438  | 49.15463724 | 6  | -0.006367934 | 311604 '26.28'    | grmzm2g088<br>919_t01 | 'misc.GDSL-motif lipase'                                                |
| 445 Fuma | 7 | 129970942 | 70.62091409 | 6  | -0.005265067 | 128832 '8.1.1.1'  | grmzm2g128<br>121_t01 | 'TCA / org.<br>transformation.TCA.pyruvate DH.E1'                       |
| 446 Fuma | 7 | 159657824 | 105.8008762 | 37 | 0.003170054  | '29.5.11.1705 20' | grmzm2g080<br>549_t01 | 'protein.degradation.ubiquitin.proteasom'                               |
| 447 Fuma | 7 | 162478003 | 113.1505321 | 5  | 0.004030903  | 16072 '27.3.29'   | grmzm2g180<br>568_t01 | 'RNA.regulation of transcription.TCP transcription factor family'       |
| 448 Fuma | 7 | 162478193 | 113.1514273 | 13 | 0.004228173  | 15882 '27.3.29'   | grmzm2g180<br>568_t01 | 'RNA.regulation of transcription.TCP transcription factor family'       |
| 449 Fuma | 7 | 162482540 | 113.1719093 | 13 | 0.003306758  | 11535 '27.3.29'   | grmzm2g180<br>568_t01 | 'RNA.regulation of transcription.TCP transcription factor family'       |
| 450 Fuma | 8 | 156139987 | 82.72693349 | 6  | -0.00298176  | 1709 '1.1.5.3'    | grmzm2g059<br>191_t01 | 'PS.lightreaction.other electron carrier (ox/red).ferredoxin reductase' |
| 451 Fuma | 8 | 160438189 | 89.3463314  | 64 | 0.003362949  | 2833 '26.17'      | grmzm2g180<br>335_t01 | 'misc.dynamin'                                                          |

|          |    |           |             |    |              |                 |                    |                                                                           |
|----------|----|-----------|-------------|----|--------------|-----------------|--------------------|---------------------------------------------------------------------------|
| 452 Fuma | 8  | 160597062 | 89.61860448 | 5  | 0.004068163  | 25092 '23.3.3'  | grmzm2g013_060_t01 | 'nucleotide metabolism.salvage.NU DIX hydrolases'                         |
| 453 Fuma | 8  | 160929154 | 90.26562868 | 10 | 0.003237693  | 10379 '27.3.26' | grmzm2g107_504_t01 | 'RNA.regulation of transcription.MYB-related transcription factor family' |
| 454 Fuma | 10 | 89924492  | 41.55012521 | 6  | 0.006236087  | 36850 '20.2.2'  | grmzm2g367_330_t01 | 'stress.abiotic.cold'                                                     |
| 455 Fuma | 10 | 148039817 | 99.52795003 | 15 | 0.003588536  | 6373 '29.5.2'   | grmzm2g173_682_t01 | 'protein.degradation.auto phagy'                                          |
| 456 Fuma | 10 | 148043393 | 99.54799587 | 25 | 0.004260238  | 2797 '29.5.2'   | grmzm2g173_682_t01 | 'protein.degradation.auto phagy'                                          |
| 457 Gluc | 1  | 19427291  | 35.91876596 | 7  | -0.027454867 | 61046 '16.1'    | grmzm2g097_283_t01 | 'secondary metabolism.isoprenoids'                                        |
| 458 Gluc | 1  | 19427753  | 35.91919409 | 22 | -0.037111842 | 60584 '16.1'    | grmzm2g097_283_t01 | 'secondary metabolism.isoprenoids'                                        |
| 459 Gluc | 1  | 19745377  | 36.21353287 | 15 | -0.032734262 | 2983 '34.9'     | grmzm2g147_481_t01 | 'transport.metabolite transporters at the mitochondrial membrane'         |
| 460 Gluc | 1  | 19745402  | 36.21355604 | 13 | -0.045012011 | 2958 '34.9'     | grmzm2g147_481_t01 | 'transport.metabolite transporters at the mitochondrial membrane'         |
| 461 Gluc | 1  | 45048717  | 61.17102638 | 9  | 0.038550257  | 67243 '16.8.1'  | ac212219.3_fgt005  | 'secondary metabolism.flavonoids. anthocyanins'                           |

|     |      |   |           |             |    |              |                       |                       |                                                                                   |
|-----|------|---|-----------|-------------|----|--------------|-----------------------|-----------------------|-----------------------------------------------------------------------------------|
| 462 | Gluc | 1 | 48047150  | 63.48200445 | 8  | 0.034229401  | '29.5.11.55161 4.3.4' | grmzm2g162<br>356_t01 | 'protein.degradation.ubiquitin.E3.SCF.RBX'                                        |
| 463 | Gluc | 1 | 51070607  | 65.47738632 | 7  | 0.029008336  | 45712 '9.1.2'         | grmzm2g018<br>941_t01 | 'mitochondrial electron transport / ATP synthesis.NADH-DH.localisation not clear' |
| 464 | Gluc | 1 | 56261977  | 69.68972945 | 5  | 0.023260105  | 53491 '27.3.35'       | grmzm2g062<br>391_t01 | 'RNA.regulation of transcription.bZIP transcription factor family'                |
| 465 | Gluc | 1 | 155941648 | 90.6953495  | 7  | 0.038011307  | 260842 '6.9'          | ac210816.3_f<br>gt007 | 'gluconeogenese/glyoxylate cycle.isocitrate lyase'                                |
| 466 | Gluc | 1 | 219996077 | 128.8274919 | 14 | 0.047101374  | 175158 '27.1.19'      | grmzm2g101<br>105_t01 | 'RNA.processing.ribonucleases'                                                    |
| 467 | Gluc | 1 | 222371522 | 129.7775422 | 6  | 0.060501845  | 490 '29.5.9'          | grmzm2g170<br>982_t01 | 'protein.degradation.AA A type'                                                   |
| 468 | Gluc | 1 | 239603760 | 141.3379825 | 11 | -0.05994586  | 66143 '28.1'          | grmzm2g017<br>237_t01 | 'DNA.synthesis/chromatin structure'                                               |
| 469 | Gluc | 2 | 3583432   | 9.929705575 | 9  | -0.023800048 | 1758 '17.2.3'         | grmzm2g365<br>162_t01 | 'hormone metabolism.auxin.induced-regulated-responsive-activated'                 |
| 470 | Gluc | 2 | 3583516   | 9.930283959 | 21 | -0.023735882 | 1674 '17.2.3'         | grmzm2g365<br>162_t01 | 'hormone metabolism.auxin.induced-regulated-responsive-activated'                 |
| 471 | Gluc | 2 | 3980052   | 10.9932083  | 9  | -0.020514387 | 2373 '29.2.5'         | grmzm2g044<br>011_t01 | 'protein.synthesis.release'                                                       |

|     |      |   |           |             |    |              |        |           |                       |                                                                                      |
|-----|------|---|-----------|-------------|----|--------------|--------|-----------|-----------------------|--------------------------------------------------------------------------------------|
| 472 | Gluc | 2 | 4089979   | 11.27575825 | 6  | -0.027570085 | 57389  | '1.3.13'  | grmzm2g039<br>345_t01 | 'PS.calvin cycle.rubisco<br>interacting'                                             |
| 473 | Gluc | 2 | 4154747   | 11.44223414 | 8  | -0.02251602  | 6885   | '3.5'     | grmzm2g039<br>588_t01 | 'minor CHO<br>metabolism.others'                                                     |
| 474 | Gluc | 2 | 5500383   | 16.53049076 | 8  | -0.031577515 | 15524  | '33.99'   | grmzm2g174<br>784_t01 | 'development.unspecific<br>d'                                                        |
| 475 | Gluc | 2 | 21516360  | 52.5167576  | 7  | -0.044827778 | 29670  | '27.3.22' | grmzm2g351<br>330_t01 | 'RNA.regulation of<br>transcription.HB,Homeo<br>box transcription factor<br>family'  |
| 476 | Gluc | 2 | 21991139  | 53.30019341 | 33 | -0.044813254 | 34     | '27.3.9'  | grmzm2g404<br>973_t03 | 'RNA.regulation of<br>transcription.C2C2(Zn)<br>GATA transcription<br>factor family' |
| 477 | Gluc | 2 | 21995485  | 53.30230537 | 23 | -0.037693821 | 118804 | '1.1.6'   | grmzm2g109<br>244_t01 | 'PS.lightreaction.NADH<br>DH'                                                        |
| 478 | Gluc | 2 | 21996541  | 53.30281854 | 21 | -0.033790264 | 117748 | '1.1.6'   | grmzm2g109<br>244_t01 | 'PS.lightreaction.NADH<br>DH'                                                        |
| 479 | Gluc | 2 | 61159379  | 74.01441319 | 8  | -0.032013585 | 39101  | '29.5.3'  | grmzm2g122<br>239_t01 | 'protein.degradation.cyst<br>eine protease'                                          |
| 480 | Gluc | 2 | 160568992 | 82.32572371 | 9  | -0.041399233 | 263469 | '30.2.3'  | grmzm2g163<br>724_t01 | 'signalling.receptor<br>kinases.leucine rich<br>repeat III'                          |

|     |      |   |           |             |    |              |        |           |                       |                                                                                                |
|-----|------|---|-----------|-------------|----|--------------|--------|-----------|-----------------------|------------------------------------------------------------------------------------------------|
| 481 | Gluc | 2 | 175895506 | 86.83396756 | 12 | 0.048831829  | 104436 | '31.1'    | grmzm2g009<br>136_t01 | 'cell.organisation'                                                                            |
| 482 | Gluc | 2 | 186768867 | 98.0043879  | 8  | -0.035176619 | 73501  | '27.3.57' | grmzm2g052<br>908_t01 | 'RNA.regulation of<br>transcription.JUMONJI<br>family'                                         |
| 483 | Gluc | 2 | 188188473 | 99.75988308 | 11 | -0.03166046  | 33508  | '9.1.2'   | grmzm2g087<br>312_t01 | 'mitochondrial electron<br>transport / ATP<br>synthesis.NADH-<br>DH.localisation not<br>clear' |
| 484 | Gluc | 3 | 1878568   | 3.303968086 | 7  | -0.028976818 | 3965   | '29.4'    | grmzm2g156<br>035_t01 | 'protein.postranslational<br>modification'                                                     |
| 485 | Gluc | 3 | 1878573   | 3.303993959 | 5  | -0.031384063 | 3960   | '29.4'    | grmzm2g156<br>035_t01 | 'protein.postranslational<br>modification'                                                     |
| 486 | Gluc | 3 | 1878755   | 3.304935735 | 5  | -0.021125504 | 3778   | '29.4'    | grmzm2g156<br>035_t01 | 'protein.postranslational<br>modification'                                                     |
| 487 | Gluc | 3 | 4677417   | 17.51176627 | 6  | -0.021815356 | 37710  | '30.8'    | grmzm2g357<br>124_t01 | 'signalling.misc'                                                                              |
| 488 | Gluc | 3 | 10108659  | 34.7208259  | 23 | -0.027274921 | 2203   | '34.2'    | grmzm2g429<br>964_t01 | 'transport.sugars'                                                                             |
| 489 | Gluc | 3 | 10750452  | 36.00654788 | 19 | -0.029665146 | 3267   | '34.18'   | grmzm2g051<br>753_t02 | 'transport.unspecified<br>anions'                                                              |
| 490 | Gluc | 3 | 13310374  | 40.12977866 | 10 | -0.029446598 | 65180  | '34'      | grmzm2g116<br>053_t01 | 'transport'                                                                                    |

|     |      |   |           |             |    |              |                            |                       |                                                         |
|-----|------|---|-----------|-------------|----|--------------|----------------------------|-----------------------|---------------------------------------------------------|
| 491 | Gluc | 3 | 13634107  | 40.54837757 | 8  | -0.028513384 | 44007 '29.4'               | grmzm2g129<br>482_t01 | 'protein.postranslational<br>modification'              |
| 492 | Gluc | 3 | 16806728  | 44.65069551 | 9  | -0.029377307 | 567 '25'                   | ac215260.3_f<br>gt004 | 'C1-metabolism'<br><br>'protein.synthesis.riboso<br>mal |
| 493 | Gluc | 3 | 19194362  | 47.73799582 | 8  | -0.033080281 | 207619 '29.2.1.2<br>.2.26' | grmzm2g327<br>564_t01 | protein.eukaryotic.60S<br>subunit.L26'                  |
| 494 | Gluc | 3 | 49808116  | 56.5306869  | 16 | -0.031996718 | 396537 '29.4'              | grmzm2g170<br>120_t01 | 'protein.postranslational<br>modification'              |
| 495 | Gluc | 3 | 67958527  | 58.10223721 | 5  | -0.033220713 | 20464 '21.4'               | grmzm2g110<br>286_t01 | 'redox.glutaredoxins'                                   |
| 496 | Gluc | 3 | 84984528  | 58.15869307 | 19 | -0.053941727 | 65318 '16.1.5'             | ac214360.3_f<br>gt001 | 'secondary<br>metabolism.isoprenoids.t<br>erpenoids'    |
| 497 | Gluc | 3 | 126612628 | 60.92265927 | 13 | -0.036596401 | 51156 '27.1.1.'            | grmzm2g162<br>119_t01 | 'RNA.processing.splicin<br>g'                           |
| 498 | Gluc | 3 | 135511148 | 62.83074525 | 10 | -0.032809231 | 348 '8.1.1.2'              | grmzm2g165<br>176_t01 | 'TCA / org.<br>transformation.TCA.pyr<br>uvate DH.E2'   |

|     |      |   |           |             |    |              |        |                   |                       |                                                                           |
|-----|------|---|-----------|-------------|----|--------------|--------|-------------------|-----------------------|---------------------------------------------------------------------------|
| 499 | Gluc | 3 | 213286642 | 125.2764546 | 22 | 0.027989477  | 37906  | '17.2.2'          | grmzm2g126<br>260_t02 | 'hormone<br>metabolism.auxin.signal<br>transduction'                      |
| 500 | Gluc | 3 | 223962036 | 146.2391988 | 22 | 0.049820979  | 38215  | '27.3.12'         | grmzm2g422<br>205_t01 | 'RNA.regulation of<br>transcription.C3H zinc<br>finger family'            |
| 501 | Gluc | 4 | 82547651  | 56.71433525 | 9  | -0.032568459 | 264716 | '15.2'            | grmzm2g166<br>711_t01 | 'metal handling.binding,<br>chelation and storage'                        |
| 502 | Gluc | 4 | 93788979  | 57.69805012 | 9  | -0.054449121 | 23236  | '34.99'           | grmzm2g043<br>075_t01 | 'transport.misc'                                                          |
| 503 | Gluc | 4 | 94875017  | 57.72053661 | 9  | -0.046879342 | 324483 | '27.1.1'          | grmzm2g011<br>034_t01 | 'RNA.processing.splicin<br>g'                                             |
| 504 | Gluc | 4 | 103678485 | 57.89068149 | 10 | -0.02674891  | 100683 | '29.4'            | grmzm2g378<br>949_t01 | 'protein.postranslational<br>modification'                                |
| 505 | Gluc | 4 | 110571777 | 58.03760973 | 7  | -0.026815621 | 125684 | '29.5.11.<br>4.2' | grmzm2g127<br>690_t01 | 'protein.degradation.ubiq<br>uitin.E3.RING'                               |
| 506 | Gluc | 4 | 142457660 | 60.337891   | 31 | -0.04524174  | 26116  | '16.2.1.1<br>'    | grmzm2g160<br>541_t01 | 'secondary<br>metabolism.phenylpropa<br>noids.lignin<br>biosynthesis.PAL' |
| 507 | Gluc | 4 | 243115508 | 132.4118713 | 10 | -0.035189308 | 4881   | '29.4'            | grmzm2g166<br>035_t01 | 'protein.postranslational<br>modification'                                |
| 508 | Gluc | 4 | 243119871 | 132.428798  | 9  | -0.053005896 | 518    | '29.4'            | grmzm2g166<br>035_t01 | 'protein.postranslational<br>modification'                                |



|     |      |   |          |             |    |              |       |           |                       |                                                                          |
|-----|------|---|----------|-------------|----|--------------|-------|-----------|-----------------------|--------------------------------------------------------------------------|
| 509 | Gluc | 5 | 1571929  | 2.012971503 | 64 | -0.030891034 | 1299  | '17.2.1'  | grmzm2g125<br>552_t01 | 'hormone<br>metabolism.auxin.synthe<br>sis-degradation'                  |
| 510 | Gluc | 5 | 2357601  | 5.023225032 | 15 | -0.03524917  | 4455  | '27.3.67' | grmzm2g003<br>068_t01 | 'RNA.regulation of<br>transcription.putative<br>transcription regulator' |
| 511 | Gluc | 5 | 2358292  | 5.027739617 | 11 | -0.034233745 | 3764  | '27.3.67' | grmzm2g003<br>068_t01 | 'RNA.regulation of<br>transcription.putative<br>transcription regulator' |
| 512 | Gluc | 5 | 7584397  | 28.79525161 | 9  | 0.05608891   | 77874 | '14.1'    | grmzm2g051<br>270_t01 | 'S-assimilation.ATPS'                                                    |
| 513 | Gluc | 5 | 7815403  | 29.72899837 | 23 | 0.066760523  | 1221  | '31.3'    | grmzm2g147<br>814_t01 | 'cell.cycle'                                                             |
| 514 | Gluc | 5 | 10372835 | 33.33515135 | 6  | 0.037017755  | 18639 | '27.3.67' | grmzm2g408<br>897_t01 | 'RNA.regulation of<br>transcription.putative<br>transcription regulator' |
| 515 | Gluc | 5 | 10642005 | 33.95941932 | 32 | 0.047231589  | 20871 | '30.6'    | grmzm2g163<br>217_t01 | 'signalling.MAP kinases'                                                 |
| 516 | Gluc | 5 | 11555355 | 36.07769085 | 9  | 0.04595894   | 2509  | '27.1.2'  | grmzm2g123<br>459_t01 | 'RNA.processing.RNA<br>helicase'                                         |
| 517 | Gluc | 5 | 15080589 | 45.43333631 | 7  | -0.041567563 | 15173 | '27.3.67' | grmzm2g379<br>428_t01 | 'RNA.regulation of<br>transcription.putative<br>transcription regulator' |
| 518 | Gluc | 5 | 15334088 | 45.78544974 | 26 | -0.0335316   | 915   | '34.21'   | grmzm2g340<br>578_t01 | 'transport.calcium'                                                      |

|     |      |   |           |             |    |              |        |                     |                       |                                                                                                          |
|-----|------|---|-----------|-------------|----|--------------|--------|---------------------|-----------------------|----------------------------------------------------------------------------------------------------------|
| 519 | Gluc | 5 | 23315145  | 53.64866829 | 8  | -0.048304577 | 55948  | '29.5'              | grmzm2g422<br>539_t01 | 'protein.degradation'                                                                                    |
| 520 | Gluc | 5 | 36811132  | 58.27317542 | 5  | -0.030458025 | 335265 | '30.5'              | grmzm2g122<br>805_t01 | 'signalling.G-proteins'                                                                                  |
| 521 | Gluc | 5 | 36811154  | 58.27317812 | 24 | -0.030783704 | 335243 | '30.5'              | grmzm2g122<br>805_t01 | 'signalling.G-proteins'<br>'lipid'                                                                       |
| 522 | Gluc | 5 | 37443804  | 58.32813065 | 7  | -0.027227488 | 17734  | '11.3'              | grmzm2g005<br>260_t01 | metabolism.Phospholipi<br>d synthesis'                                                                   |
| 523 | Gluc | 5 | 38114919  | 58.37370611 | 5  | -0.032853631 | 53769  | '27.3.99'           | grmzm2g436<br>064_t01 | 'RNA.regulation of<br>transcription.unclassified<br>'                                                    |
| 524 | Gluc | 5 | 88070567  | 69.41851202 | 9  | -0.048661521 | 49109  | '27.3.28'           | grmzm2g111<br>136_t01 | 'RNA.regulation of<br>transcription.SBP,Squam<br>osa promoter binding<br>protein family'                 |
| 525 | Gluc | 5 | 114204945 | 70.51015923 | 15 | -0.037585673 | 775936 | '29.5.11.<br>4.3.2' | grmzm2g069<br>649_t01 | 'protein.degradation.ubiq<br>uitin.E3.SCF.FBOX'<br>'RNA.regulation of<br>transcription.unclassified<br>' |
| 526 | Gluc | 5 | 149251475 | 73.13980408 | 9  | -0.039233421 | 89010  | '27.3.99'           | grmzm2g019<br>971_t01 | 'hormone<br>metabolism.auxin.induce<br>d-regulated-responsive-<br>activated'                             |
| 527 | Gluc | 5 | 163819573 | 76.76334725 | 6  | 0.03892669   | 1736   | '17.2.3'            | grmzm2g312<br>274_t01 |                                                                                                          |

|     |      |   |           |             |    |              |                  |                       |                                                                                                           |
|-----|------|---|-----------|-------------|----|--------------|------------------|-----------------------|-----------------------------------------------------------------------------------------------------------|
| 528 | Gluc | 5 | 165729383 | 77.90457087 | 6  | -0.068401599 | 845 '27.3.3'     | grmzm2g016<br>434_t01 | 'RNA.regulation of transcription.AP2/EREB P, APETALA2/Ethylene-responsive element binding protein family' |
| 529 | Gluc | 5 | 167871133 | 79.69575659 | 8  | -0.063461483 | 8514 '2.1.2.3'   | grmzm2g032<br>628_t01 | 'major CHO metabolism.synthesis.starch.starch branching'                                                  |
| 530 | Gluc | 5 | 168259864 | 79.99109637 | 14 | -0.054728927 | 9174 '29.4'      | grmzm2g038<br>536_t01 | 'protein.postranslational modification'                                                                   |
| 531 | Gluc | 5 | 168260887 | 79.99218626 | 6  | -0.044931698 | 8151 '29.4'      | grmzm2g038<br>536_t01 | 'protein.postranslational modification'                                                                   |
| 532 | Gluc | 5 | 192568110 | 101.6096752 | 10 | 0.062349209  | 29848 '34.99'    | grmzm2g014<br>977_t01 | 'transport.misc'                                                                                          |
| 533 | Gluc | 5 | 200083354 | 107.7054585 | 5  | -0.035928509 | 140 '27.3.6'     | grmzm2g101<br>350_t03 | 'RNA.regulation of transcription.bHLH,Basic Helix-Loop-Helix family'                                      |
| 534 | Gluc | 5 | 200531277 | 108.3769927 | 13 | 0.049459237  | 66857 '23.1.1.1' | grmzm2g147<br>450_t01 | 'nucleotide metabolism.synthesis.pyrimidine.carbamoyl phosphate synthetase'                               |
| 535 | Gluc | 5 | 201231896 | 109.0981131 | 11 | -0.04069251  | 122362 '29.5.5'  | grmzm2g079<br>352_t01 | 'protein.degradation.serine protease'                                                                     |
| 536 | Gluc | 5 | 209935600 | 130.9474516 | 5  | 0.054968328  | 529 '30.11'      | grmzm2g104<br>920_t01 | 'signalling.light'                                                                                        |

|     |      |   |           |              |    |              |                                    |                       |                                                                                                    |
|-----|------|---|-----------|--------------|----|--------------|------------------------------------|-----------------------|----------------------------------------------------------------------------------------------------|
| 537 | Gluc | 5 | 212261524 | 139.7573696  | 29 | 0.03161962   | '29.5.11. grmzm2g122<br>17396 4.2' | 284_t01               | 'protein.degradation.ubiq<br>uitin.E3.RING'                                                        |
| 538 | Gluc | 5 | 213298320 | 144.5886587  | 7  | 0.03745947   | 20740 '31.1'                       | grmzm2g180<br>418_t01 | 'cell.organisation'                                                                                |
| 539 | Gluc | 6 | 1331502   | -9.338084147 | 17 | 0.048982117  | '29.5.11. grmzm2g423<br>438 4.2'   | 956_t03               | 'protein.degradation.ubiq<br>uitin.E3.RING'                                                        |
| 540 | Gluc | 6 | 1335665   | -9.333360919 | 20 | 0.044914068  | 1362 '1.1.5.2'                     | grmzm2g122<br>337_t01 | 'PS.lightreaction.other<br>electron carrier<br>(ox/red).ferredoxin'                                |
| 541 | Gluc | 6 | 9189279   | -0.422862181 | 10 | 0.0457043    | '18.5.2.4 grmzm2g066<br>282 '      | 426_t01               | 'Co-factor and vitamine<br>metabolism.folate &<br>vitamine K.o-Succinyl-<br>BenzoylCoa Synthetase' |
| 542 | Gluc | 6 | 49947554  | 8.548807235  | 13 | 0.050794602  | 512668 '29.4'                      | grmzm2g145<br>360_t01 | 'protein.postranslational<br>modification'                                                         |
| 543 | Gluc | 6 | 122728773 | 45.27892524  | 28 | -0.090243045 | 74670 '30.3'                       | grmzm2g071<br>100_t01 | 'signalling.calcium'                                                                               |
| 544 | Gluc | 6 | 123562319 | 45.55520364  | 14 | -0.085892259 | 24435 '34.3'                       | grmzm2g148<br>200_t01 | 'transport.amino acids'                                                                            |
| 545 | Gluc | 6 | 157445216 | 76.89711855  | 5  | -0.059505241 | 29598 '10.7'                       | grmzm2g007<br>708_t01 | 'cell wall.modification'                                                                           |
| 546 | Gluc | 6 | 157953572 | 77.68801846  | 6  | -0.050730304 | 34606 '27.3.99'                    | grmzm2g032<br>847_t01 | 'RNA.regulation of<br>transcription.unclassified<br>'                                              |

|     |      |   |           |             |    |              |                 |                       |                                                                                                |
|-----|------|---|-----------|-------------|----|--------------|-----------------|-----------------------|------------------------------------------------------------------------------------------------|
| 547 | Gluc | 7 | 3665692   | 13.3545418  | 11 | -0.043550162 | 4647 '27.3.22'  | grmzm2g028<br>041_t01 | 'RNA.regulation of<br>transcription.HB,Homeo<br>box transcription factor<br>family'            |
| 548 | Gluc | 7 | 20233795  | 44.69829015 | 5  | -0.032821318 | 2989 '27.3.69'  | ac233961.1_f<br>gt001 | 'RNA.regulation of<br>transcription.SET-<br>domain transcriptional<br>regulator family'        |
| 549 | Gluc | 7 | 27327128  | 46.7793044  | 15 | -0.031600786 | 64745 '33.99'   | grmzm2g086<br>757_t01 | 'development.unspecifie<br>d'                                                                  |
| 550 | Gluc | 7 | 32868948  | 47.79855164 | 40 | -0.03385516  | 422764 '26.21'  | grmzm2g000<br>221_t01 | 'misc.protease<br>inhibitor/seed<br>storage/lipid transfer<br>protein (LTP) family<br>protein' |
| 551 | Gluc | 7 | 84574592  | 49.92029539 | 16 | -0.03318546  | 15252 '31.4'    | grmzm2g360<br>648_t01 | 'cell.vesicle transport'                                                                       |
| 552 | Gluc | 7 | 151684587 | 89.72788592 | 23 | 0.050943726  | 169523 '34.2'   | grmzm2g019<br>974_t01 | 'transport.sugars'                                                                             |
| 553 | Gluc | 7 | 151704874 | 89.76604438 | 13 | 0.063838907  | 149236 '34.2'   | grmzm2g019<br>974_t01 | 'transport.sugars'                                                                             |
| 554 | Gluc | 7 | 159106172 | 104.5548504 | 6  | -0.033343837 | 34316 '27.3.67' | grmzm2g037<br>444_t01 | 'RNA.regulation of<br>transcription.putative<br>transcription regulator'                       |
| 555 | Gluc | 7 | 166657242 | 123.8438631 | 13 | 0.046507086  | 67872 '20.2.2'  | grmzm2g364<br>643_t01 | 'stress.abiotic.cold'                                                                          |

|     |      |   |           |             |    |              |        |                   |                       |                                                                                                                       |
|-----|------|---|-----------|-------------|----|--------------|--------|-------------------|-----------------------|-----------------------------------------------------------------------------------------------------------------------|
| 556 | Gluc | 7 | 167223656 | 126.3055595 | 5  | 0.04371809   | 3332   | '34.15'           | grmzm2g166<br>738_t01 | 'transport.potassium'                                                                                                 |
| 557 | Gluc | 7 | 168146720 | 130.3172954 | 14 | 0.038042497  | 10144  | '27.3.8'          | ac155434.2_f<br>gt006 | 'RNA.regulation of<br>transcription.C2C2(Zn)<br>DOF zinc finger family'                                               |
| 558 | Gluc | 7 | 168146779 | 130.3175518 | 16 | 0.050979889  | 10085  | '27.3.8'          | ac155434.2_f<br>gt006 | 'RNA.regulation of<br>transcription.C2C2(Zn)<br>DOF zinc finger family'                                               |
| 559 | Gluc | 7 | 168259468 | 130.8073104 | 11 | 0.027577674  | 625    | '29.5.1'          | grmzm2g059<br>165_t01 | 'protein.degradation.subt<br>ilases'                                                                                  |
| 560 | Gluc | 7 | 168322280 | 131.0802981 | 6  | 0.034001816  | 10705  | '27.1'            | grmzm2g470<br>461_t01 | 'RNA.processing'                                                                                                      |
| 561 | Gluc | 7 | 169418608 | 134.40687   | 6  | 0.032947988  | 70945  | '27.3'            | grmzm2g122<br>116_t01 | 'RNA.regulation of<br>transcription'                                                                                  |
| 562 | Gluc | 7 | 169612994 | 134.5554328 | 6  | -0.060679509 | 158800 | '33.99'           | grmzm2g032<br>711_t02 | 'development.unspecifie<br>d'                                                                                         |
| 563 | Gluc | 7 | 170074937 | 134.9084806 | 8  | 0.04615997   | 63845  | '17.1.1.1<br>.10' | grmzm2g330<br>848_t01 | 'hormone<br>metabolism.abscisic<br>acid.synthesis-<br>degradation.synthesis.9-<br>cis-epoxycarotenoid<br>dioxygenase' |
| 564 | Gluc | 8 | 10208359  | 26.24898642 | 5  | -0.026684796 | 195798 | '29.5.11.<br>4.2' | grmzm2g003<br>930_t01 | 'protein.degradation.ubiq<br>uitin.E3.RING'                                                                           |

|     |      |   |           |             |    |              |                 |                       |                                                                                |
|-----|------|---|-----------|-------------|----|--------------|-----------------|-----------------------|--------------------------------------------------------------------------------|
| 565 | Gluc | 8 | 10978629  | 28.40458338 | 9  | -0.025432862 | 8479 '33.99'    | grmzm2g030<br>384_t01 | 'development.unspecific<br>d'                                                  |
| 566 | Gluc | 8 | 13271527  | 33.98105    | 6  | -0.027208471 | 13787 '30.2.17' | grmzm2g172<br>368_t01 | 'signalling.receptor<br>kinases.DUF 26'                                        |
| 567 | Gluc | 8 | 15541604  | 37.97326272 | 22 | -0.033735477 | 49349 '5.2'     | grmzm2g038<br>821_t01 | 'fermentation.PDC'                                                             |
| 568 | Gluc | 8 | 17101531  | 39.8048484  | 7  | -0.028932686 | 7086 '29.5'     | grmzm2g162<br>928_t01 | 'protein.degradation'                                                          |
| 569 | Gluc | 8 | 17783857  | 40.90236227 | 24 | -0.035698197 | 79627 '26.2'    | grmzm2g457<br>929_t01 | 'misc.UDP glucosyl and<br>glucoronyl transferases'                             |
| 570 | Gluc | 8 | 141607731 | 72.49035639 | 5  | 0.035922564  | 161506 '29.5.2' | grmzm2g005<br>304_t01 | 'protein.degradation.auto<br>phagy'                                            |
| 571 | Gluc | 8 | 160611990 | 89.64768912 | 7  | 0.033050154  | 10164 '23.3.3'  | grmzm2g013<br>060_t01 | 'nucleotide<br>metabolism.salvage.NU<br>DIX hydrolases'                        |
| 572 | Gluc | 8 | 161247986 | 90.88681804 | 17 | 0.025027089  | 13207 '27.3.6'  | grmzm2g030<br>762_t02 | 'RNA.regulation of<br>transcription.bHLH,Basi<br>c Helix-Loop-Helix<br>family' |
| 573 | Gluc | 8 | 161456583 | 91.29323346 | 6  | 0.027119377  | 35931 '27.3'    | grmzm2g170<br>941_t01 | 'RNA.regulation of<br>transcription'                                           |

|     |      |   |           |              |    |              |        |                     |                       |                                                                                      |
|-----|------|---|-----------|--------------|----|--------------|--------|---------------------|-----------------------|--------------------------------------------------------------------------------------|
| 574 | Gluc | 8 | 162617259 | 92.65142696  | 6  | 0.024273535  | 171454 | '28.1'              | grmzm2g421<br>829_t01 | 'DNA.synthesis/chromati<br>n structure'                                              |
| 575 | Gluc | 8 | 173914014 | 136.3104872  | 19 | 0.020511215  | 1481   | '30.2.11'           | ac203173.3_f<br>gt002 | 'signalling.receptor<br>kinases.leucine rich<br>repeat XI'                           |
| 576 | Gluc | 9 | 2701441   | -3.388186607 | 6  | -0.065619148 | 6507   | '27.2'              | grmzm2g180<br>836_t01 | 'RNA.transcription'                                                                  |
| 577 | Gluc | 9 | 6998866   | 8.219401947  | 9  | -0.027000187 | 109804 | '27.2'              | grmzm2g017<br>537_t01 | 'RNA.transcription'                                                                  |
| 578 | Gluc | 9 | 7182819   | 8.716269429  | 28 | -0.045797986 | 56750  | '17.7.1.5           | grmzm2g000<br>236_t01 | 'hormone<br>metabolism.jasmonate.sy<br>nthesis-degradation.12-<br>Oxo-PDA-reductase' |
| 579 | Gluc | 9 | 10186494  | 15.44407336  | 6  | -0.034472041 | 49289  | '29.2.1.2<br>.1.17' | grmzm2g086<br>906_t01 | 'protein.synthesis.riboso<br>mal<br>protein.eukaryotic.40S<br>subunit.S17'           |
| 580 | Gluc | 9 | 26517167  | 43.30986818  | 6  | 0.044089609  | 21521  | '31.1'              | grmzm2g136<br>838_t01 | 'cell.organisation'                                                                  |
| 581 | Gluc | 9 | 26517266  | 43.30992673  | 33 | 0.044430659  | 21422  | '31.1'              | grmzm2g136<br>838_t01 | 'cell.organisation'                                                                  |
| 582 | Gluc | 9 | 60088439  | 45.65313865  | 30 | 0.055300858  | 218331 | '11.6'              | grmzm2g025<br>026_t01 | 'lipid metabolism.lipid<br>transfer proteins etc'                                    |



|     |      |    |           |             |    |              |         |               |                       |                                                                                                     |
|-----|------|----|-----------|-------------|----|--------------|---------|---------------|-----------------------|-----------------------------------------------------------------------------------------------------|
| 583 | Gluc | 9  | 144805016 | 93.75044572 | 11 | 0.03694982   | 32253   | '29.5.11.4.2' | grmzm2g004<br>157_t01 | 'protein.degradation.ubiquitin.E3.RING'                                                             |
| 584 | Gluc | 10 | 5427445   | 17.07840286 | 48 | -0.069028108 | 16980   | '27.3.35'     | grmzm2g365<br>754_t01 | 'RNA.regulation of transcription.bZIP transcription factor family'                                  |
| 585 | Gluc | 10 | 37230981  | 36.08777546 | 15 | 0.057220632  | 332073  | '20.2.1'      | grmzm2g117<br>836_t01 | 'stress.abiotic.heat'                                                                               |
| 586 | Gluc | 10 | 52110744  | 36.32411544 | 18 | 0.071276311  | 1185032 | '27.3.1'      | grmzm2g405<br>170_t01 | 'RNA.regulation of transcription.ABI3/VP1-related B3-domain-containing transcription factor family' |
| 587 | Gluc | 10 | 76226092  | 38.27843109 | 8  | 0.042662267  | 84      | '11.1.13'     | grmzm2g079<br>908_t04 | 'lipid metabolism.FA synthesis and FA elongation.acyl-CoA binding protein'                          |
| 588 | Gluc | 10 | 76332289  | 38.30539729 | 11 | 0.043798998  | 72244   | '27.3.6'      | grmzm2g042<br>895_t01 | 'RNA.regulation of transcription.bHLH,Basic Helix-Loop-Helix family'                                |
| 589 | Gluc | 10 | 85540940  | 40.43084945 | 33 | 0.066852209  | 45425   | '26.12'       | grmzm2g006<br>727_t01 | 'misc.peroxidases'                                                                                  |
| 590 | Gluc | 10 | 138301683 | 66.29092836 | 9  | -0.037590118 | 12353   | '11.1.8'      | af466202.2_f<br>gt012 | 'lipid metabolism.FA synthesis and FA elongation.acyl coa ligase'                                   |
| 591 | Gluc | 10 | 144247405 | 82.22431479 | 8  | -0.040531525 | 33015   | '27.2'        | grmzm2g427<br>031_t01 | 'RNA.transcription'                                                                                 |
| 592 | Gluc | 10 | 148193563 | 100.3897975 | 8  | -0.046829239 | 5178    | '34.15'       | grmzm2g093<br>643_t01 | 'transport.potassium'                                                                               |

|     |      |   |           |             |    |              |        |           |                       |                                                                                                |
|-----|------|---|-----------|-------------|----|--------------|--------|-----------|-----------------------|------------------------------------------------------------------------------------------------|
| 593 | Glut | 1 | 52690146  | 67.43745454 | 13 | -0.00764858  | 22847  | '26.21'   | grmzm2g174<br>680_t01 | 'misc.protease<br>inhibitor/seed<br>storage/lipid transfer<br>protein (LTP) family<br>protein' |
| 594 | Glut | 1 | 182943941 | 98.00929506 | 43 | 0.004651268  | 216    | '34.13'   | grmzm2g152<br>555_t01 | 'transport.peptides and<br>oligopeptides'                                                      |
| 595 | Glut | 1 | 182944297 | 98.00949265 | 10 | 0.004698343  | 65017  | '27.4'    | ac233867.1_f<br>gt004 | 'RNA.RNA binding'                                                                              |
| 596 | Glut | 1 | 183661710 | 98.46017249 | 25 | 0.005469687  | 25203  | '28.99'   | grmzm2g113<br>899_t01 | 'DNA.unspecified'                                                                              |
| 597 | Glut | 1 | 219467828 | 128.6162207 | 53 | -0.006511624 | 667    | '23.3.3'  | grmzm2g136<br>426_t01 | 'nucleotide<br>metabolism.salvage.NU<br>DIX hydrolases'                                        |
| 598 | Glut | 1 | 220903481 | 129.1904047 | 5  | -0.011601406 | 66180  | '27.3.20' | grmzm2g113<br>742_t01 | 'RNA.regulation of<br>transcription.G2-like<br>transcription factor<br>family, GARP'           |
| 599 | Glut | 1 | 221341695 | 129.3656668 | 12 | -0.009264172 | 184041 | '34.3'    | grmzm2g149<br>946_t01 | 'transport.amino acids'                                                                        |
| 600 | Glut | 1 | 277632495 | 170.2619536 | 14 | 0.010539017  | 5122   | '34.8'    | grmzm2g147<br>589_t01 | 'transport.metabolite<br>transporters at the<br>envelope membrane'                             |
| 601 | Glut | 2 | 4153357   | 11.43866137 | 14 | 0.008070873  | 8275   | '3.5'     | grmzm2g039<br>588_t01 | 'minor CHO<br>metabolism.others'                                                               |

|     |      |   |           |             |    |              |                  |                       |                                                                                    |
|-----|------|---|-----------|-------------|----|--------------|------------------|-----------------------|------------------------------------------------------------------------------------|
| 602 | Glut | 2 | 4153720   | 11.4395944  | 56 | 0.009484778  | 7912 '3.5'       | grmzm2g039<br>588_t01 | 'minor CHO<br>metabolism.others'                                                   |
| 603 | Glut | 2 | 4299868   | 11.96628803 | 12 | 0.003568927  | 6339 '34.1'      | grmzm2g019<br>404_t01 | 'transport.p- and v-<br>ATPases'                                                   |
| 604 | Glut | 2 | 12590485  | 36.29106182 | 5  | -0.008475169 | 109481 '27.3.32' | grmzm2g024<br>898_t01 | 'RNA.regulation of<br>transcription.WRKY<br>domain transcription<br>factor family' |
| 605 | Glut | 2 | 133606697 | 78.41212615 | 8  | -0.005723744 | 63584 '27.3.57'  | grmzm2g352<br>947_t01 | 'RNA.regulation of<br>transcription.JUMONJI<br>family'                             |
| 606 | Glut | 2 | 185662626 | 96.4222994  | 8  | 0.005714311  | 2562 '27.3.6'    | grmzm2g009<br>478_t01 | 'RNA.regulation of<br>transcription.bHLH,Basi<br>c Helix-Loop-Helix<br>family'     |
| 607 | Glut | 2 | 186287170 | 97.21489693 | 11 | 0.00486937   | 399 '34.99'      | grmzm2g031<br>837_t01 | 'transport.misc'                                                                   |
| 608 | Glut | 2 | 186556918 | 97.58848824 | 7  | 0.00560792   | 10606 '10.5.1.1' | grmzm2g081<br>017_t01 | 'cell wall.cell wall<br>proteins.AGPs.AGP'                                         |
| 609 | Glut | 2 | 186556997 | 97.58864326 | 38 | 0.004943913  | 10527 '10.5.1.1' | grmzm2g081<br>017_t01 | 'cell wall.cell wall<br>proteins.AGPs.AGP'                                         |
| 610 | Glut | 2 | 186558389 | 97.59137473 | 6  | 0.004850272  | 9135 '10.5.1.1'  | grmzm2g081<br>017_t01 | 'cell wall.cell wall<br>proteins.AGPs.AGP'                                         |
| 611 | Glut | 2 | 186558494 | 97.59158077 | 8  | 0.005489912  | 9030 '10.5.1.1'  | grmzm2g081<br>017_t01 | 'cell wall.cell wall<br>proteins.AGPs.AGP'                                         |
| 612 | Glut | 2 | 209437807 | 120.3370062 | 6  | -0.006286015 | 15304 '3.2.2'    | grmzm2g117<br>564_t01 | 'minor CHO<br>metabolism.trehalose.TP<br>P'                                        |

|     |      |   |           |             |    |              |        |           |                       |                                                                                                                        |
|-----|------|---|-----------|-------------|----|--------------|--------|-----------|-----------------------|------------------------------------------------------------------------------------------------------------------------|
| 613 | Glut | 2 | 210076624 | 121.1447377 | 5  | -0.007333198 | 53109  | '27.3.25' | grmzm2g703<br>373_t01 | 'RNA.regulation of<br>transcription.MYB<br>domain transcription<br>factor family'                                      |
| 614 | Glut | 2 | 233601849 | 155.7785003 | 5  | -0.004272848 | 14405  | '8.1.7'   | grmzm2g079<br>888_t01 | 'TCA / org.<br>transformation.TCA.succ<br>inate dehydrogenase'                                                         |
| 615 | Glut | 3 | 201451737 | 108.647491  | 5  | -0.009148834 | 237980 | '31.1'    | grmzm2g113<br>319_t01 | 'cell.organisation'                                                                                                    |
| 616 | Glut | 3 | 209190519 | 119.5728622 | 8  | -0.008009729 | 5234   | '21.2'    | grmzm2g024<br>348_t01 | 'redox.ascorbate and<br>glutathione'                                                                                   |
| 617 | Glut | 3 | 210306116 | 120.8801933 | 6  | -0.016920822 | 112218 | '4.2.14'  | grmzm2g152<br>686_t01 | 'glycolysis.plastid<br>branch.pyruvate kinase<br>(PK)'                                                                 |
| 618 | Glut | 3 | 210710907 | 121.3852837 | 8  | -0.017895411 | 255559 | '27.3.3'  | grmzm2g160<br>971_t01 | 'RNA.regulation of<br>transcription.AP2/EREB<br>P, APETALA2/Ethylene-<br>responsive element<br>binding protein family' |
| 619 | Glut | 3 | 210877159 | 121.5927298 | 12 | -0.004934249 | 89307  | '27.3.3'  | grmzm2g160<br>971_t01 | 'RNA.regulation of<br>transcription.AP2/EREB<br>P, APETALA2/Ethylene-<br>responsive element<br>binding protein family' |
| 620 | Glut | 3 | 210988072 | 121.7311249 | 6  | -0.016726602 | 146991 | '29.4'    | grmzm2g118<br>403_t01 | 'protein.postranslational<br>modification'                                                                             |

|     |      |   |           |             |    |              |        |           |                       |                                                                               |
|-----|------|---|-----------|-------------|----|--------------|--------|-----------|-----------------------|-------------------------------------------------------------------------------|
| 621 | Glut | 3 | 211148597 | 121.9314249 | 16 | -0.005852378 | 32247  | '27.3.32' | grmzm2g408<br>462_t01 | 'RNA.regulation of transcription.WRKY domain transcription factor family'     |
| 622 | Glut | 3 | 212234516 | 123.2864138 | 7  | -0.005205315 | 10080  | '16.7'    | grmzm2g349<br>407_t01 | 'secondary metabolism.wax'                                                    |
| 623 | Glut | 3 | 212718903 | 123.8908226 | 5  | -0.004685377 | 3621   | '34.15'   | grmzm2g022<br>915_t01 | 'transport.potassium'                                                         |
| 624 | Glut | 3 | 213151216 | 124.9438117 | 7  | -0.004725778 | 3719   | '27.3.69' | ac212898.2_f<br>gt006 | 'RNA.regulation of transcription.SET-domain transcriptional regulator family' |
| 625 | Glut | 3 | 213151324 | 124.944077  | 8  | -0.004513687 | 3611   | '27.3.69' | ac212898.2_f<br>gt006 | 'RNA.regulation of transcription.SET-domain transcriptional regulator family' |
| 626 | Glut | 3 | 213890769 | 126.7603538 | 6  | -0.010464009 | 58898  | '27.3.69' | grmzm2g047<br>695_t02 | 'RNA.regulation of transcription.SET-domain transcriptional regulator family' |
| 627 | Glut | 3 | 215225785 | 128.93347   | 9  | -0.005251452 | 36593  | '26.13'   | grmzm2g068<br>690_t01 | 'misc.acid and other phosphatases'                                            |
| 628 | Glut | 3 | 225244456 | 148.4971299 | 11 | 0.010839249  | 49906  | '31.1'    | grmzm2g001<br>981_t02 | 'cell.organisation'                                                           |
| 629 | Glut | 3 | 228108627 | 153.4517969 | 9  | -0.007734346 | 104550 | '27.1.1'  | grmzm2g078<br>592_t01 | 'RNA.processing.splicing'                                                     |

|     |      |   |           |             |    |              |        |                       |         |                                                                                                                  |
|-----|------|---|-----------|-------------|----|--------------|--------|-----------------------|---------|------------------------------------------------------------------------------------------------------------------|
| 630 | Glut | 4 | 113973202 | 58.11061842 | 7  | 0.012195634  | 117232 | '27.3.25'             | 167_t01 | grmzm2g059<br>'RNA.regulation of<br>transcription.MYB<br>domain transcription<br>factor family'                  |
| 631 | Glut | 4 | 114035361 | 58.11195261 | 27 | 0.009580393  | 55073  | '27.3.25'             | 167_t01 | grmzm2g059<br>'RNA.regulation of<br>transcription.MYB<br>domain transcription<br>factor family'                  |
| 632 | Glut | 4 | 114684938 | 58.12589523 | 19 | 0.012290204  | 557504 | '30.4'                | 080_t01 | grmzm2g171<br>'signalling.phosphinositi<br>des'                                                                  |
| 633 | Glut | 4 | 114784127 | 58.12802424 | 11 | 0.008190782  | 458315 | '30.4'                | 080_t01 | grmzm2g171<br>'signalling.phosphinositi<br>des'                                                                  |
| 634 | Glut | 4 | 177057914 | 88.36703104 | 8  | -0.004129286 | 66135  | '20.1'                | 811_t01 | grmzm2g158<br>'stress.biotic'                                                                                    |
| 635 | Glut | 4 | 177728199 | 89.41877612 | 7  | -0.004671784 | 11473  | '10.3'                | 983_t01 | grmzm2g015<br>'cell wall.hemicellulose<br>synthesis'                                                             |
| 636 | Glut | 4 | 180521118 | 93.50092348 | 6  | -0.003964857 | 92480  | '16.10'               | 033_t01 | grmzm2g169<br>'secondary<br>metabolism.simple<br>phenols'                                                        |
| 637 | Glut | 4 | 180521269 | 93.50113855 | 12 | -0.003984467 | 92329  | '16.10'               | 033_t01 | grmzm2g169<br>'secondary<br>metabolism.simple<br>phenols'                                                        |
| 638 | Glut | 5 | 2188871   | 3.920842986 | 34 | 0.004382943  | 1646   | '29.2.1.1<br>'3.2.30' | 336_t01 | grmzm2g085<br>'protein.synthesis.riboso<br>mal<br>protein.prokaryotic.unkn<br>own organellar.50S<br>subunit.L30' |

|     |      |   |           |             |    |              |                            |                       |                                                                                               |
|-----|------|---|-----------|-------------|----|--------------|----------------------------|-----------------------|-----------------------------------------------------------------------------------------------|
| 639 | Glut | 5 | 2188935   | 3.921261124 | 7  | 0.004596176  | '29.2.1.1<br>1582 .3.2.30' | grmzm2g085<br>336_t01 | 'protein.synthesis.ribosomal<br>protein.prokaryotic.unknown<br>organellar.50S<br>subunit.L30' |
| 640 | Glut | 5 | 22628584  | 52.93088442 | 10 | 0.004845342  | 588 '29.5.5'               | grmzm2g082<br>502_t01 | 'protein.degradation.serine<br>protease'                                                      |
| 641 | Glut | 5 | 24406989  | 53.96237944 | 33 | 0.005600127  | 73517 '26.1'               | grmzm2g032<br>910_t01 | 'misc.misc2'                                                                                  |
| 642 | Glut | 5 | 26831469  | 54.87846643 | 28 | 0.004300894  | 3614 '16.8.2'              | grmzm2g477<br>683_t01 | 'secondary<br>metabolism.flavonoids.c<br>halcones'                                            |
| 643 | Glut | 5 | 26968073  | 54.93008209 | 8  | 0.004561445  | 93823 '30.2.17'            | grmzm2g102<br>862_t01 | 'signalling.receptor<br>kinases.DUF 26'                                                       |
| 644 | Glut | 5 | 204624078 | 116.4807852 | 18 | -0.008453086 | 3280 '26.2'                | grmzm2g142<br>709_t01 | 'misc.UDP glucosyl and<br>glucuronyl transferases'                                            |
| 645 | Glut | 5 | 207099285 | 124.0780936 | 14 | -0.005034335 | 1942 '3.2.2'               | grmzm2g055<br>150_t01 | 'minor CHO<br>metabolism.trehalose.TP<br>P'                                                   |
| 646 | Glut | 5 | 207830710 | 126.0436057 | 6  | -0.005515777 | 883 '30.1.1'               | grmzm2g081<br>214_t01 | 'signalling.in sugar and<br>nutrient physiology'                                              |
| 647 | Glut | 5 | 208181590 | 126.6094235 | 22 | -0.00481065  | 154180 '29.5'              | grmzm2g371<br>795_t01 | 'protein.degradation'                                                                         |
| 648 | Glut | 5 | 211971359 | 138.4052511 | 12 | -0.004321074 | 49314 '20.2.1'             | grmzm2g040<br>890_t01 | 'stress.abiotic.heat'                                                                         |

|     |      |   |           |              |    |              |        |                    |                       |                                                                           |
|-----|------|---|-----------|--------------|----|--------------|--------|--------------------|-----------------------|---------------------------------------------------------------------------|
| 649 | Glut | 6 | 5873783   | -4.184534568 | 5  | -0.004487679 | 145507 | '27.3.50'          | grmzm2g019<br>257_t01 | 'RNA.regulation of transcription.General Transcription'                   |
| 650 | Glut | 6 | 12079085  | 2.855833808  | 5  | -0.006531182 | 237506 | '27.3.32'          | grmzm2g143<br>765_t01 | 'RNA.regulation of transcription.WRKY domain transcription factor family' |
| 651 | Glut | 6 | 17417589  | 5.992091218  | 17 | -0.007355935 | 109426 | '26.3'             | grmzm2g465<br>617_t01 | 'misc.gluco-, galacto- and mannosidases'                                  |
| 652 | Glut | 7 | 46996523  | 49.11264731  | 7  | 0.008798227  | 15096  | '16.2'             | grmzm2g177<br>424_t01 | 'secondary metabolism.phenylpropa noids'                                  |
| 653 | Glut | 7 | 94886697  | 50.37959201  | 10 | 0.005639153  | 149175 | '9.7'              | grmzm2g126<br>408_t01 | 'mitochondrial electron transport / ATP synthesis.cytochrome c oxidase'   |
| 654 | Glut | 7 | 142900670 | 81.10277074  | 5  | 0.006182641  | 22269  | '30.2.24'          | grmzm2g413<br>030_t01 | 'signalling.receptor kinases.S-locus glycoprotein like'                   |
| 655 | Glut | 7 | 153318373 | 92.800926    | 8  | 0.005690411  | 31356  | '29.5.7'           | ac197013.3_f<br>gt003 | 'protein.degradation.met alloprotease'                                    |
| 656 | Glut | 8 | 6455489   | 18.09391822  | 6  | 0.00847514   | 89221  | '29.2.1.2<br>.1.5' | grmzm2g156<br>673_t01 | 'protein.synthesis.riboso mal protein.eukaryotic.40S subunit.S5'          |
| 657 | Glut | 8 | 6456227   | 18.0946642   | 11 | 0.008664988  | 88483  | '29.2.1.2<br>.1.5' | grmzm2g156<br>673_t01 | 'protein.synthesis.riboso mal protein.eukaryotic.40S subunit.S5'          |
| 658 | Glut | 8 | 7548635   | 19.78341505  | 71 | 0.007377193  | 21940  | '29.3.4.1<br>'     | grmzm2g078<br>941_t01 | 'protein.targeting.secreto ry pathway.ER'                                 |



|     |      |    |           |             |    |              |                  |                       |                                                                             |
|-----|------|----|-----------|-------------|----|--------------|------------------|-----------------------|-----------------------------------------------------------------------------|
| 659 | Glut | 8  | 101278421 | 58.12094124 | 7  | 0.004952541  | 45822 '27.3.27'  | grmzm2g104<br>400_t01 | 'RNA.regulation of transcription.NAC domain transcription factor family'    |
| 660 | Glut | 8  | 103054530 | 58.74182186 | 12 | 0.007297413  | 99819 '20.1'     | grmzm2g017<br>603_t01 | 'stress.biotic'                                                             |
| 661 | Glut | 8  | 108849125 | 60.58213104 | 58 | 0.007826556  | 31652 '27.3.32'  | grmzm2g449<br>681_t01 | 'RNA.regulation of transcription.WRKY domain transcription factor family'   |
| 662 | Glut | 8  | 111162784 | 61.25050555 | 6  | 0.005962952  | 102802 '30.2.25' | grmzm2g061<br>718_t01 | 'signalling.receptor kinases.wall associated kinase'                        |
| 663 | Glut | 9  | 147914070 | 105.0171122 | 7  | -0.005016694 | 13728 '27.3.9'   | grmzm2g532<br>534_t01 | 'RNA.regulation of transcription.C2C2(Zn) GATA transcription factor family' |
| 664 | Glut | 10 | 4806482   | 13.07619208 | 13 | 0.004785432  | 108510 '27.3.20' | grmzm2g016<br>370_t01 | 'RNA.regulation of transcription.G2-like transcription factor family, GARP' |
| 665 | Glut | 10 | 4916937   | 13.82732142 | 5  | 0.005675285  | 11772 '26.10'    | grmzm2g016<br>264_t01 | 'misc.cytochrome P450'                                                      |
| 666 | Glut | 10 | 107945494 | 44.01972245 | 13 | -0.005346414 | 4236 '11.1.4'    | grmzm2g099<br>696_t01 | 'lipid metabolism.FA synthesis and FA elongation.ACP oxoacyl reductase'     |

|     |      |    |           |             |    |             |       |                   |            |                                                                      |
|-----|------|----|-----------|-------------|----|-------------|-------|-------------------|------------|----------------------------------------------------------------------|
| 667 | Glut | 10 | 121191348 | 47.87413076 | 6  | -0.00534999 | 46628 | '29.5.11.186_t01  | grmzm2g036 | 'protein.degradation.ubiquitin.ubiquitin protease'                   |
| 668 | Glut | 10 | 143716606 | 81.33488617 | 5  | 0.005311941 | 997   | '30.2.17' 633_t01 | grmzm2g000 | 'signalling.receptor kinases.DUF 26'                                 |
| 669 | Glut | 10 | 143720983 | 81.33864061 | 5  | 0.006129575 | 1790  | '30.2.24' 620_t01 | grmzm2g000 | 'signalling.receptor kinases.S-locus glycoprotein like'              |
| 670 | Glut | 10 | 145459551 | 86.83094884 | 6  | 0.00654061  | 30115 | '34.18' 402_t03   | grmzm2g143 | 'transport.unspecified anions'                                       |
| 671 | Glut | 10 | 145674099 | 87.6872826  | 53 | 0.005786004 | 453   | '17.5.2' 260_t01  | grmzm2g104 | 'hormone metabolism.ethylene.signal transduction'                    |
| 672 | Glut | 10 | 146203278 | 89.79941527 | 6  | 0.005650134 | 21404 | '18.1.1' 176_t01  | grmzm2g067 | 'Co-factor and vitamine metabolism.molybdenum cofactor.gephyrin'     |
| 673 | Glut | 10 | 146744765 | 92.26833185 | 7  | 0.004535231 | 309   | '26.5' 083_t01    | grmzm2g125 | 'misc.acyl transferases'                                             |
| 674 | Glut | 10 | 148374079 | 101.4017084 | 12 | 0.006234528 | 11996 | '30.4.3' 905_t01  | grmzm2g001 | 'signalling.phosphoinositides.bis(5"-nucleosyl)-tetraphosphatase'    |
| 675 | Mala | 1  | 15026222  | 30.17736702 | 5  | -0.00767141 | 58151 | '27.3.6' 156_t01  | grmzm2g035 | 'RNA.regulation of transcription.bHLH,Basic Helix-Loop-Helix family' |

|          |   |           |             |    |              |                       |                       |                                                                                                                        |
|----------|---|-----------|-------------|----|--------------|-----------------------|-----------------------|------------------------------------------------------------------------------------------------------------------------|
| 676 Mala | 1 | 16018451  | 32.20888865 | 5  | -0.010779957 | 50801 '27.3.3'        | grmzm2g399<br>072_t01 | 'RNA.regulation of<br>transcription.AP2/EREB<br>P, APETALA2/Ethylene-<br>responsive element<br>binding protein family' |
| 677 Mala | 1 | 16018768  | 32.20944008 | 34 | -0.010507566 | 50484 '27.3.3'        | grmzm2g399<br>072_t01 | 'RNA.regulation of<br>transcription.AP2/EREB<br>P, APETALA2/Ethylene-<br>responsive element<br>binding protein family' |
| 678 Mala | 1 | 39323398  | 57.23255596 | 57 | 0.011761998  | 91097 '27.3.67'       | grmzm2g119<br>168_t01 | 'RNA.regulation of<br>transcription.putative<br>transcription regulator'                                               |
| 679 Mala | 1 | 40056302  | 57.91121791 | 14 | 0.007307404  | 235662 '27.3.21'      | grmzm2g049<br>159_t01 | 'RNA.regulation of<br>transcription.GRAS<br>transcription factor<br>family'                                            |
| 680 Mala | 1 | 88319619  | 83.94252884 | 5  | 0.005107759  | 58893 '29.4'          | grmzm2g392<br>477_t01 | 'protein.postranslational<br>modification'                                                                             |
| 681 Mala | 1 | 90444879  | 84.51213232 | 6  | 0.007232955  | '13.2.2.2<br>325287 ' | grmzm2g053<br>720_t01 | 'amino acid<br>metabolism.degradation.<br>glutamate family.proline'                                                    |
| 682 Mala | 1 | 210010258 | 121.8475905 | 9  | -0.007472494 | 40418 '31.2'          | grmzm2g128<br>605_t01 | 'cell.division'                                                                                                        |
| 683 Mala | 1 | 219597467 | 128.6680693 | 5  | -0.010215717 | 104121 '29.4'         | grmzm2g032<br>351_t01 | 'protein.postranslational<br>modification'                                                                             |

|          |   |           |             |    |              |                 |                       |                                                                                 |
|----------|---|-----------|-------------|----|--------------|-----------------|-----------------------|---------------------------------------------------------------------------------|
| 684 Mala | 1 | 219599713 | 128.6689676 | 17 | -0.008622717 | 101875 '29.4'   | grmzm2g032<br>351_t01 | 'protein.postranslational<br>modification'                                      |
| 685 Mala | 1 | 222370635 | 129.7771875 | 21 | -0.010317833 | 1377 '29.5.9'   | grmzm2g170<br>982_t01 | 'protein.degradation.AA<br>A type'                                              |
| 686 Mala | 1 | 292093541 | 191.7018819 | 15 | 0.029138599  | 2718 '27.3.11'  | grmzm2g061<br>626_t01 | 'RNA.regulation of<br>transcription.C2H2 zinc<br>finger family'                 |
| 687 Mala | 1 | 295777277 | 199.3871057 | 5  | 0.021925596  | 63417 '26.22'   | ac217358.3_f<br>gt007 | 'misc.short chain<br>dehydrogenase/reductase<br>(SDR)'                          |
| 688 Mala | 2 | 2111645   | 4.01866061  | 8  | 0.006346054  | 97852 '30.2.11' | grmzm2g452<br>142_t01 | 'signalling.receptor<br>kinases.leucine rich<br>repeat XI'                      |
| 689 Mala | 2 | 2662790   | 6.10191746  | 5  | 0.012572964  | 6023 '9.4'      | grmzm2g010<br>555_t01 | 'mitochondrial electron<br>transport / ATP<br>synthesis.alternative<br>oxidase' |
| 690 Mala | 2 | 4313222   | 12.01705821 | 7  | 0.008065261  | 13790 '28.1'    | grmzm2g314<br>171_t01 | 'DNA.synthesis/chromati<br>n structure'                                         |
| 691 Mala | 2 | 4829815   | 13.98107797 | 14 | 0.007986073  | 6617 '28.1'     | grmzm2g032<br>977_t02 | 'DNA.synthesis/chromati<br>n structure'                                         |
| 692 Mala | 2 | 5064142   | 14.87195891 | 10 | 0.009403602  | 7583 '28.99'    | grmzm2g082<br>097_t01 | 'DNA.unspecified'                                                               |

|          |   |           |             |    |              |                       |                       |                                                                          |
|----------|---|-----------|-------------|----|--------------|-----------------------|-----------------------|--------------------------------------------------------------------------|
| 693 Mala | 2 | 5064288   | 14.87251398 | 29 | 0.009676366  | 7437 '28.99'          | grmzm2g082<br>097_t01 | 'DNA.unspecified'                                                        |
| 694 Mala | 2 | 5564443   | 16.77403859 | 17 | 0.007030808  | 3595 '29.5.11.4.2'    | grmzm2g174<br>926_t01 | 'protein.degradation.ubiquitin.E3.RING'                                  |
| 695 Mala | 2 | 38490452  | 66.37064702 | 10 | -0.008181854 | 125815 '26.7'         | grmzm2g147<br>884_t01 | 'misc.oxidases - copper, flavone etc.'                                   |
| 696 Mala | 2 | 53075256  | 72.33109749 | 67 | -0.01005034  | 87822 '29.5.11.4.3.2' | grmzm2g014<br>905_t01 | 'protein.degradation.ubiquitin.E3.SCF.FBOX'                              |
| 697 Mala | 2 | 121233141 | 77.09963877 | 6  | -0.008726546 | 46834 '29.3.4.2'      | grmzm2g075<br>680_t01 | 'protein.targeting.secretory pathway.golgi'                              |
| 698 Mala | 2 | 187425746 | 99.07896093 | 34 | 0.006597118  | 54226 '16.1.2.3'      | grmzm2g058<br>095_t01 | 'secondary metabolism.isoprenoids. mevalonate pathway.HMG-CoA reductase' |
| 699 Mala | 2 | 188442924 | 99.98704342 | 26 | 0.010380475  | 958 '27.3.6'          | grmzm2g083<br>504_t01 | 'RNA.regulation of transcription.bHLH,Basic Helix-Loop-Helix family'     |
| 700 Mala | 2 | 190921710 | 102.1999719 | 13 | 0.007946425  | 38921 '27.3.6'        | grmzm2g107<br>560_t01 | 'RNA.regulation of transcription.bHLH,Basic Helix-Loop-Helix family'     |
| 701 Mala | 2 | 190922255 | 102.2004584 | 6  | 0.005818998  | 38376 '27.3.6'        | grmzm2g107<br>560_t01 | 'RNA.regulation of transcription.bHLH,Basic Helix-Loop-Helix family'     |
| 702 Mala | 2 | 208636969 | 118.3801568 | 72 | -0.009940999 | 55417 '28.99'         | grmzm2g056<br>564_t01 | 'DNA.unspecified'                                                        |

|          |   |           |             |    |              |                 |                       |                                                                                          |
|----------|---|-----------|-------------|----|--------------|-----------------|-----------------------|------------------------------------------------------------------------------------------|
| 703 Mala | 3 | 28560505  | 53.70440674 | 76 | 0.012754816  | 85679 '30.2.22' | grmzm2g355<br>636_t01 | 'signalling.receptor<br>kinases.proline extensin<br>like'                                |
| 704 Mala | 3 | 110591868 | 58.89150506 | 6  | 0.009305688  | 39853 '26.2'    | grmzm2g105<br>991_t01 | 'misc.UDP glucosyl and<br>glucuronyl transferases'                                       |
| 705 Mala | 3 | 197969185 | 105.1512436 | 6  | 0.008872874  | 62723 '30.2.22' | ac211175.3_f<br>gt005 | 'signalling.receptor<br>kinases.proline extensin<br>like'                                |
| 706 Mala | 3 | 200646842 | 108.1602931 | 7  | 0.006749729  | 73097 '27.3.28' | grmzm2g387<br>993_t01 | 'RNA.regulation of<br>transcription.SBP,Squam<br>osa promoter binding<br>protein family' |
| 707 Mala | 3 | 207468446 | 116.9659734 | 5  | 0.007830782  | 3580 '24'       | grmzm2g164<br>674_t01 | 'Biodegradation of<br>Xenobiotics'                                                       |
| 708 Mala | 3 | 208722589 | 119.0297927 | 10 | 0.018556936  | 73790 '30.2.17' | grmzm2g142<br>207_t01 | 'signalling.receptor<br>kinases.DUF 26'                                                  |
| 709 Mala | 3 | 208759190 | 119.072271  | 7  | 0.018809679  | 37189 '30.2.17' | grmzm2g142<br>207_t01 | 'signalling.receptor<br>kinases.DUF 26'                                                  |
| 710 Mala | 3 | 213856232 | 126.6755216 | 29 | -0.008429835 | 32667 '1.5.1'   | grmzm2g121<br>878_t01 | 'PS.carbon concentrating<br>mechanism.C4'                                                |

|          |   |           |             |    |              |                |                       |                                                                        |
|----------|---|-----------|-------------|----|--------------|----------------|-----------------------|------------------------------------------------------------------------|
| 711 Mala | 3 | 214330739 | 127.7703198 | 23 | -0.007870489 | 21484 '10.6.3' | grmzm2g037<br>431_t01 | 'cell<br>wall.degradation.pectate<br>lyases and<br>polygalacturonases' |
| 712 Mala | 3 | 214355739 | 127.8009362 | 14 | -0.007817618 | 58715 '27.1'   | grmzm2g132<br>340_t01 | 'RNA.processing'                                                       |
| 713 Mala | 3 | 223533563 | 145.1258349 | 43 | -0.006537456 | 14617 '26.28'  | grmzm2g022<br>279_t01 | 'misc.GDSL-motif lipase'                                               |
| 714 Mala | 4 | 170999854 | 79.42178824 | 8  | -0.017758613 | 8040 '34.7'    | grmzm2g466<br>545_t01 | 'transport.phosphate'                                                  |
| 715 Mala | 4 | 171775102 | 80.83509484 | 83 | -0.010613833 | 5168 '2.1.2.2' | grmzm2g130<br>043_t01 | 'major CHO<br>metabolism.synthesis.sta<br>rch.starch synthase'         |
| 716 Mala | 4 | 180344878 | 93.24990822 | 5  | 0.026764303  | 79417 '29.5.4' | grmzm2g098<br>583_t01 | 'protein.degradation.aspa<br>rtate protease'                           |
| 717 Mala | 5 | 2767759   | 7.538649577 | 9  | -0.023022027 | 11198 '21.99'  | grmzm2g165<br>270_t01 | 'redox.misc'                                                           |
| 718 Mala | 5 | 4189784   | 13.29548628 | 8  | -0.024817481 | 467 '27.3.40'  | grmzm2g152<br>796_t01 | 'RNA.regulation of<br>transcription.Aux/IAA<br>family'                 |
| 719 Mala | 5 | 5266701   | 18.78312331 | 16 | -0.018541237 | 2175 '1.1.2.2' | grmzm2g085<br>646_t01 | 'PS.lightreaction.photosy<br>stem I.PSI polypeptide<br>subunits'       |

|          |   |           |              |    |              |                  |                       |                                                                          |
|----------|---|-----------|--------------|----|--------------|------------------|-----------------------|--------------------------------------------------------------------------|
| 720 Mala | 5 | 25580476  | 54.40578016  | 17 | 0.006381893  | '29.5.11.4.2'    | grmzm2g120<br>933_t01 | 'protein.degradation.ubiquitin.E3.RING'                                  |
| 721 Mala | 5 | 35870702  | 58.15768893  | 9  | 0.007312398  | 32733 '26.28'    | grmzm2g087<br>827_t01 | 'misc.GDSL-motif lipase'                                                 |
| 722 Mala | 5 | 159516767 | 75.22607915  | 59 | 0.006946802  | 253397 '21.1'    | grmzm2g052<br>402_t01 | 'redox.thioredoxin'                                                      |
| 723 Mala | 5 | 196990966 | 105.0448056  | 21 | -0.006739831 | '29.3.4.9.9'     | grmzm2g075<br>253_t01 | 'protein.targeting.secretory pathway.unspecified'                        |
| 724 Mala | 5 | 196991427 | 105.0451889  | 6  | -0.007454933 | '29.3.4.9.9'     | grmzm2g075<br>253_t01 | 'protein.targeting.secretory pathway.unspecified'                        |
| 725 Mala | 5 | 213281396 | 144.5097958  | 5  | -0.007254868 | 4948 '29.4'      | grmzm2g180<br>430_t02 | 'protein.postranslational modification'                                  |
| 726 Mala | 5 | 214193499 | 148.7600372  | 10 | -0.005516584 | 4894 '29.4'      | grmzm2g150<br>932_t01 | 'protein.postranslational modification'                                  |
| 727 Mala | 6 | 2173089   | -8.383242223 | 8  | -0.007048492 | 22535 '11.6'     | grmzm2g118<br>378_t01 | 'lipid metabolism.lipid transfer proteins etc'                           |
| 728 Mala | 6 | 3682882   | -6.670271784 | 7  | -0.007945361 | 191768 '27.3.27' | grmzm2g030<br>325_t01 | 'RNA.regulation of transcription.NAC domain transcription factor family' |



|          |   |           |              |    |              |                   |                       |                                                                                                                        |
|----------|---|-----------|--------------|----|--------------|-------------------|-----------------------|------------------------------------------------------------------------------------------------------------------------|
| 729 Mala | 6 | 6894842   | -3.026068551 | 6  | -0.005310972 | 7826 '4.1.8'      | grmzm2g180<br>625_t01 | 'glycolysis.cytosolic<br>branch.glyceraldehyde 3-<br>phosphate<br>dehydrogenase (GAP-<br>DH)'                          |
| 730 Mala | 6 | 9251251   | -0.35255042  | 21 | -0.006131661 | 309523 '30.11'    | grmzm2g301<br>803_t03 | 'signalling.light'                                                                                                     |
| 731 Mala | 6 | 160133599 | 84.08459515  | 7  | -0.010156075 | 2236 '27.3.12'    | grmzm2g004<br>795_t01 | 'RNA.regulation of<br>transcription.C3H zinc<br>finger family'                                                         |
| 732 Mala | 6 | 161832235 | 87.63268966  | 6  | -0.009770832 | 3229 '28.1'       | grmzm2g121<br>262_t01 | 'DNA.synthesis/chromati<br>n structure'                                                                                |
| 733 Mala | 6 | 162218871 | 89.54447098  | 6  | -0.006148267 | 3301 '34.99'      | grmzm2g174<br>990_t03 | 'transport.misc'                                                                                                       |
| 734 Mala | 6 | 162665812 | 91.75443968  | 12 | -0.008612649 | 7730 '27.3.3'     | grmzm2g059<br>939_t01 | 'RNA.regulation of<br>transcription.AP2/EREB<br>P, APETALA2/Ethylene-<br>responsive element<br>binding protein family' |
| 735 Mala | 6 | 163284243 | 94.27967325  | 19 | -0.005380966 | 18263 '12.2.1'    | grmzm2g375<br>064_t01 | 'N-metabolism.ammonia<br>metabolism.glutamate<br>synthase'                                                             |
| 736 Mala | 6 | 165585617 | 102.9436765  | 17 | -0.006076029 | 133380 '11.9.2.1' | ac231411.1_f<br>gt011 | 'lipid metabolism.lipid<br>degradation.lipases.triac<br>ylglycerol lipase'                                             |

|          |   |           |             |    |              |                  |         |            |                                                                                 |
|----------|---|-----------|-------------|----|--------------|------------------|---------|------------|---------------------------------------------------------------------------------|
| 737 Mala | 7 | 118340956 | 59.84562968 | 7  | -0.012097666 | 352705 '27.3.11' | 031_t01 | grmzm2g141 | 'RNA.regulation of transcription.C2H2 zinc finger family'                       |
| 738 Mala | 7 | 131033445 | 71.16406426 | 19 | -0.009077321 | 66256 '11.1.7'   | 955_t01 | grmzm2g143 | 'lipid metabolism.FA synthesis and FA elongation.ACP thioesterase'              |
| 739 Mala | 7 | 143058340 | 81.14259414 | 5  | -0.006769154 | 77047 '20.1'     | 557_t01 | grmzm2g397 | 'stress.biotic'                                                                 |
| 740 Mala | 7 | 145583488 | 83.49098005 | 9  | -0.005789243 | 22971 '27.3.28'  | 624_t01 | grmzm2g067 | 'RNA.regulation of transcription.SBP,Squam osa promoter binding protein family' |
| 741 Mala | 7 | 146746400 | 84.65040768 | 13 | -0.007872159 | 46919 '26.7'     | 225_t01 | grmzm2g076 | 'misc.oxidases - copper, flavone etc.'                                          |
| 742 Mala | 7 | 163624094 | 115.764038  | 48 | 0.012940535  | 40018 '26.9'     | 812_t01 | grmzm2g109 | 'misc. glutathione S transferases'                                              |
| 743 Mala | 7 | 166492884 | 123.1295455 | 11 | 0.009047583  | 48105 '34.15'    | 766_t01 | grmzm2g020 | 'transport.potassium'                                                           |
| 744 Mala | 7 | 166493179 | 123.1308276 | 67 | 0.011080937  | 47810 '34.15'    | 766_t01 | grmzm2g020 | 'transport.potassium'                                                           |
| 745 Mala | 7 | 167073361 | 125.6523612 | 6  | 0.009385491  | 33016 '29.4'     | 050_t01 | grmzm2g177 | 'protein.postranslational modification'                                         |

|          |   |           |             |    |             |                           |                       |                                                                                                                                       |
|----------|---|-----------|-------------|----|-------------|---------------------------|-----------------------|---------------------------------------------------------------------------------------------------------------------------------------|
| 746 Mala | 7 | 167122054 | 125.8639863 | 17 | 0.012150093 | 40729 '26.12'             | grmzm2g042<br>347_t01 | 'misc.peroxidases'                                                                                                                    |
|          |   |           |             |    |             |                           |                       | 'amino acid<br>metabolism.synthesis.ce<br>ntral amino acid                                                                            |
| 747 Mala | 8 | 100197210 | 57.57868238 | 6  | 0.00790012  | '13.1.1.2<br>5257 .1'     | grmzm2g033<br>799_t01 | metabolism.aspartate.asp<br>artate aminotransferase'                                                                                  |
|          |   |           |             |    |             |                           |                       | 'RNA.regulation of<br>transcription.WRKY<br>domain transcription<br>factor family'                                                    |
| 748 Mala | 8 | 108849390 | 60.58220759 | 51 | 0.005689455 | 31387 '27.3.32'           | grmzm2g449<br>681_t01 |                                                                                                                                       |
|          |   |           |             |    |             |                           |                       |                                                                                                                                       |
| 749 Mala | 8 | 120917873 | 65.51878959 | 5  | 0.008136638 | 118411 '10.5.3'           | grmzm2g060<br>213_t02 | 'cell wall.cell wall<br>proteins.LRR'<br>'lipid<br>metabolism."exotics"<br>(steroids, squalene<br>etc).methylsterol<br>monooxygenase' |
| 750 Mala | 8 | 154959713 | 81.88784605 | 10 | 0.012371157 | 64396 '11.8.2'            | grmzm2g176<br>301_t01 |                                                                                                                                       |
|          |   |           |             |    |             |                           |                       |                                                                                                                                       |
| 751 Mala | 8 | 159784012 | 88.41830479 | 12 | 0.012070302 | '29.5.11.<br>19001 4.3.2' | grmzm2g064<br>954_t01 | 'protein.degradation.ubiq<br>uitin.E3.SCF.FBOX'                                                                                       |
|          |   |           |             |    |             |                           |                       |                                                                                                                                       |
| 752 Mala | 9 | 91767617  | 47.59229769 | 5  | 0.009468398 | '29.5.11.<br>80322 20'    | grmzm2g092<br>975_t01 | 'protein.degradation.ubiq<br>uitin.proteasom'                                                                                         |
|          |   |           |             |    |             |                           |                       |                                                                                                                                       |
| 753 Mala | 9 | 109432591 | 53.84671075 | 14 | 0.010241133 | 112608 '27.3.67'          | ac225193.3_f<br>gt003 | 'RNA.regulation of<br>transcription.putative<br>transcription regulator'                                                              |

|          |    |           |              |    |              |                      |                       |                                                                                                                     |
|----------|----|-----------|--------------|----|--------------|----------------------|-----------------------|---------------------------------------------------------------------------------------------------------------------|
| 754 Mala | 10 | 1210362   | -2.349387514 | 15 | -0.017276952 | '13.1.4.4<br>972 .1' | grmzm2g130<br>062_t01 | 'amino acid<br>metabolism.synthesis.bra<br>nched chain<br>group.leucine specific.2-<br>isopropylmalate<br>synthase' |
| 755 Mala | 10 | 1431221   | -1.586267435 | 6  | 0.011410568  | 2535 '16.2'          | grmzm2g104<br>710_t01 | 'secondary<br>metabolism.phenylpropa<br>noids'                                                                      |
| 756 Mala | 10 | 1467050   | -1.462469767 | 16 | 0.006758966  | 24539 '34.8'         | grmzm2g178<br>734_t01 | 'transport.metabolite<br>transporters at the<br>envelope membrane'                                                  |
| 757 Mala | 10 | 2275477   | 1.330836713  | 6  | 0.006068756  | 234464 '20.1'        | grmzm2g004<br>412_t01 | 'stress.biotic'                                                                                                     |
| 758 Mala | 10 | 2592048   | 2.424664387  | 5  | 0.008847718  | 94004 '20.1'         | grmzm2g356<br>817_t01 | 'stress.biotic'                                                                                                     |
| 759 Mala | 10 | 4201480   | 8.961984916  | 5  | 0.006361453  | 6138 '34.21'         | grmzm2g004<br>414_t01 | 'transport.calcium'                                                                                                 |
| 760 Mala | 10 | 145447601 | 86.78325234  | 17 | 0.007756603  | 3545 '18.3.2'        | grmzm2g143<br>480_t01 | 'Co-factor and vitamine<br>metabolism.riboflavin.ri<br>boflavin synthase'                                           |
| 761 Mala | 10 | 145456506 | 86.81879521  | 5  | 0.008987877  | 33160 '34.18'        | grmzm2g143<br>402_t03 | 'transport.unspecified<br>anions'                                                                                   |
| 762 Mala | 10 | 145674099 | 87.6872826   | 67 | 0.007733533  | 453 '17.5.2'         | grmzm2g104<br>260_t01 | 'hormone<br>metabolism.ethylene.sig<br>nal transduction'                                                            |

|     |      |    |           |             |    |              |                 |                       |                                                                                                                        |
|-----|------|----|-----------|-------------|----|--------------|-----------------|-----------------------|------------------------------------------------------------------------------------------------------------------------|
| 763 | Mala | 10 | 145733506 | 87.92439606 | 8  | 0.009243772  | 1685 '34.1'     | grmzm2g006<br>894_t01 | 'transport.p- and v-<br>ATPases'                                                                                       |
| 764 | Nitr | 1  | 5563538   | 9.70193737  | 75 | 0.003559647  | 45127 '27.3.27' | grmzm2g025<br>642_t01 | 'RNA.regulation of<br>transcription.NAC<br>domain transcription<br>factor family'                                      |
| 765 | Nitr | 1  | 51114082  | 65.50613364 | 11 | 0.003292823  | 2237 '9.1.2'    | grmzm2g018<br>941_t01 | 'mitochondrial electron<br>transport / ATP<br>synthesis.NADH-<br>DH.localisation not<br>clear'                         |
| 766 | Nitr | 1  | 60210415  | 71.99893136 | 5  | 0.002949116  | 17955 '29.2.4'  | grmzm2g000<br>923_t01 | 'protein.synthesis.elongat<br>ion'                                                                                     |
| 767 | Nitr | 1  | 63667791  | 73.22732147 | 7  | 0.00318244   | 30179 '26.12'   | grmzm2g004<br>984_t01 | 'misc.peroxidases'                                                                                                     |
| 768 | Nitr | 1  | 199491006 | 112.8925649 | 7  | -0.000697051 | 1925 '27.3.3'   | grmzm2g369<br>472_t01 | 'RNA.regulation of<br>transcription.AP2/EREB<br>P, APETALA2/Ethylene-<br>responsive element<br>binding protein family' |
| 769 | Nitr | 1  | 201845500 | 115.3791094 | 11 | -0.000756257 | 142924 '30.2.3' | grmzm2g422<br>373_t01 | 'signalling.receptor<br>kinases.leucine rich<br>repeat III'                                                            |
| 770 | Nitr | 1  | 201991158 | 115.4795854 | 6  | -0.003767123 | 65461 '10.7'    | grmzm2g309<br>269_t01 | 'cell wall.modification'                                                                                               |

|          |   |           |             |    |              |                         |                       |                                                                                      |
|----------|---|-----------|-------------|----|--------------|-------------------------|-----------------------|--------------------------------------------------------------------------------------|
| 771 Nitr | 1 | 202621762 | 115.91      | 5  | -0.0043      | 156054 '27.3.99'        | grmzm2g139<br>683_t01 | 'RNA.regulation of<br>transcription.unclassified<br>'                                |
| 772 Nitr | 1 | 207277145 | 119.465065  | 11 | -0.000793889 | 25178 '20.2.99'         | ac195794.3_f<br>gt002 | 'stress.abiotic.unspecifie<br>d'                                                     |
| 773 Nitr | 1 | 207279145 | 119.4669916 | 8  | -0.000840239 | 23178 '20.2.99'         | ac195794.3_f<br>gt002 | 'stress.abiotic.unspecifie<br>d'                                                     |
| 774 Nitr | 1 | 207313090 | 119.4996915 | 12 | -0.000961106 | 1340 '17.7.1.5'         | grmzm2g148<br>281_t02 | 'hormone<br>metabolism.jasmonate.sy<br>nthesis-degradation.12-<br>Oxo-PDA-reductase' |
| 775 Nitr | 1 | 224410655 | 132.7669157 | 12 | -0.0094014   | 6518 '27.3.10'          | grmzm2g167<br>824_t01 | 'RNA.regulation of<br>transcription.C2C2(Zn)<br>YABBY family'                        |
| 776 Nitr | 1 | 232515055 | 138.1818938 | 6  | 0.011437559  | 18981 '28.1'            | grmzm2g399<br>212_t01 | 'DNA.synthesis/chromati<br>n structure'                                              |
| 777 Nitr | 1 | 233097149 | 138.4111567 | 9  | 0.012678888  | 59166 '29.5.11.<br>4.2' | grmzm2g398<br>198_t01 | 'protein.degradation.ubiq<br>uitin.E3.RING'                                          |
| 778 Nitr | 1 | 249984566 | 148.2769963 | 25 | 0.000988754  | 38776 '27.3.99'         | grmzm2g173<br>425_t01 | 'RNA.regulation of<br>transcription.unclassified<br>'                                |
| 779 Nitr | 1 | 254217830 | 150.9046175 | 9  | 0.040341299  | 170083 '27.3.37'        | grmzm2g017<br>319_t01 | 'RNA.regulation of<br>transcription.AS2,Lateral<br>Organ Boundaries Gene<br>Family'  |

|          |   |           |              |    |              |                  |                       |                                                                                     |
|----------|---|-----------|--------------|----|--------------|------------------|-----------------------|-------------------------------------------------------------------------------------|
| 780 Nitr | 1 | 254218603 | 150.9052401  | 13 | 0.038373926  | 169310 '27.3.37' | grmzm2g017<br>319_t01 | 'RNA.regulation of<br>transcription.AS2,Lateral<br>Organ Boundaries Gene<br>Family' |
| 781 Nitr | 1 | 256241409 | 152.3975751  | 16 | 1.893176617  | 3351 '27.3.50'   | grmzm2g018<br>414_t01 | 'RNA.regulation of<br>transcription.General<br>Transcription'                       |
| 782 Nitr | 1 | 256250277 | 152.4041229  | 6  | -3.973615173 | 122894 '20.2.3'  | grmzm2g409<br>093_t01 | 'stress.abiotic.drought/sal<br>t'                                                   |
| 783 Nitr | 1 | 256300512 | 152.4470842  | 7  | -0.373608989 | 72659 '20.2.3'   | grmzm2g409<br>093_t01 | 'stress.abiotic.drought/sal<br>t'                                                   |
| 784 Nitr | 1 | 257414838 | 153.4001486  | 40 | -0.007243298 | 20 '33.1'        | grmzm2g067<br>919_t01 | 'development.storage<br>proteins'                                                   |
| 785 Nitr | 1 | 297905073 | 202.4622232  | 6  | -0.001303846 | 103155 '30.5'    | grmzm2g590<br>033_t01 | 'signalling.G-proteins'                                                             |
| 786 Nitr | 2 | 3805      | -5.496235757 | 26 | 0.001182912  | 84356 '31.4'     | grmzm2g074<br>530_t01 | 'cell.vesicle transport'                                                            |
| 787 Nitr | 2 | 2023274   | 3.619749446  | 24 | 0.001176073  | 4523 '31.8'      | grmzm2g040<br>247_t01 | 'cell.contractile vacuole'<br>'RNA.regulation of<br>transcription.ARF,              |
| 788 Nitr | 2 | 2211917   | 4.471293489  | 10 | 0.001669864  | 42195 '27.3.4'   | grmzm2g078<br>274_t01 | Auxin Response Factor<br>family'                                                    |
| 789 Nitr | 2 | 2491029   | 5.715556905  | 6  | 0.000821883  | 29658 '29.5.3'   | grmzm2g107<br>187_t01 | 'protein.degradation.cyst<br>eine protease'                                         |

|     |      |   |           |             |    |             |       |           |         |            |                                                                                               |
|-----|------|---|-----------|-------------|----|-------------|-------|-----------|---------|------------|-----------------------------------------------------------------------------------------------|
| 790 | Nitr | 2 | 9387311   | 27.56530943 | 6  | 0.001306219 | 8258  | '30.2.11' | 041_t01 | grmzm2g080 | 'signalling.receptor<br>kinases.leucine rich<br>repeat XI'                                    |
| 791 | Nitr | 2 | 31005737  | 62.07871475 | 22 | 0.001211646 | 33747 | '30.2.11' | 191_t01 | grmzm2g082 | 'signalling.receptor<br>kinases.leucine rich<br>repeat XI'                                    |
| 792 | Nitr | 2 | 36815670  | 65.26831102 | 10 | 0.001463549 | 28923 | '31.2'    | 072_t01 | grmzm2g112 | 'cell.division'                                                                               |
| 793 | Nitr | 2 | 37323751  | 65.60272826 | 11 | 0.002275836 | 214   | '28.1'    | 989_t01 | grmzm2g044 | 'DNA.synthesis/chromati<br>n structure'                                                       |
| 794 | Nitr | 2 | 181079834 | 90.99646529 | 39 | 0.001816495 | 23187 | '27.3.7'  | 954_t02 | grmzm2g005 | 'RNA.regulation of<br>transcription.C2C2(Zn)<br>CO-like, Constans-like<br>zinc finger family' |
| 795 | Nitr | 2 | 182483954 | 92.38830408 | 38 | 0.001818773 | 824   | '27.3.99' | 603_t01 | grmzm2g090 | 'RNA.regulation of<br>transcription.unclassified<br>'                                         |
| 796 | Nitr | 2 | 183983052 | 94.29078232 | 8  | 0.002369111 | 4845  | '29.5.5'  | 196_t01 | grmzm2g168 | 'protein.degradation.seri<br>ne protease'                                                     |
| 797 | Nitr | 2 | 186765944 | 97.99865221 | 7  | 0.001224906 | 303   | '27.3.6'  | 597_t02 | grmzm2g417 | 'RNA.regulation of<br>transcription.bHLH,Basi<br>c Helix-Loop-Helix<br>family'                |



|          |   |           |             |    |              |                  |                       |                                                                                    |
|----------|---|-----------|-------------|----|--------------|------------------|-----------------------|------------------------------------------------------------------------------------|
| 798 Nitr | 2 | 203303901 | 111.3475511 | 5  | 0.002210804  | 10364 '26.7'     | grmzm2g042<br>660_t01 | 'misc.oxidases - copper,<br>flavone etc.'                                          |
| 799 Nitr | 2 | 211231604 | 122.5790956 | 20 | 0.002091497  | 22098 '34.2'     | grmzm2g452<br>930_t01 | 'transport.sugars'                                                                 |
| 800 Nitr | 2 | 212538395 | 124.4779034 | 10 | 0.002047508  | 75099 '34.99'    | grmzm2g070<br>563_t01 | 'transport.misc'                                                                   |
| 801 Nitr | 3 | 8109850   | 29.6995263  | 14 | 0.003636405  | 3991 '31.4'      | grmzm2g015<br>509_t01 | 'cell.vesicle transport'                                                           |
| 802 Nitr | 3 | 8678939   | 31.22826072 | 19 | 0.003500894  | 231 '20.2.1'     | grmzm2g083<br>810_t01 | 'stress.abiotic.heat'                                                              |
| 803 Nitr | 3 | 8924944   | 31.88908441 | 11 | 0.003569052  | 103716 '27.3.32' | grmzm2g151<br>444_t01 | 'RNA.regulation of<br>transcription.WRKY<br>domain transcription<br>factor family' |
| 804 Nitr | 3 | 158547954 | 71.48562889 | 28 | 0.000938613  | 6870 '27.3.99'   | grmzm2g133<br>428_t01 | 'RNA.regulation of<br>transcription.unclassified<br>'                              |
| 805 Nitr | 3 | 210217529 | 120.7696561 | 15 | -0.000777862 | 81895 '28.99'    | grmzm2g173<br>989_t01 | 'DNA.unspecified'                                                                  |
| 806 Nitr | 3 | 212234516 | 123.2864138 | 11 | -0.00092326  | 10080 '16.7'     | grmzm2g349<br>407_t01 | 'secondary<br>metabolism.wax'                                                      |
| 807 Nitr | 3 | 212247177 | 123.3022119 | 10 | -0.000811602 | 529 '26.28'      | grmzm2g047<br>129_t01 | 'misc.GDSL-motif lipase'                                                           |

|     |      |   |           |             |    |              |        |                  |                       |                                                            |
|-----|------|---|-----------|-------------|----|--------------|--------|------------------|-----------------------|------------------------------------------------------------|
| 808 | Nitr | 3 | 212248108 | 123.3033736 | 27 | -0.000852191 | 11     | '26.28'          | grmzm2g047<br>129_t02 | 'misc.GDSL-motif lipase'                                   |
| 809 | Nitr | 3 | 212248700 | 123.3041123 | 15 | -0.000804228 | 94418  | '6.3'            | grmzm2g466<br>833_t01 | 'gluconeogenesis.Malate DH'                                |
| 810 | Nitr | 3 | 213848077 | 126.6554907 | 7  | -0.000894249 | 40822  | '1.5.1'          | grmzm2g121<br>878_t01 | 'PS.carbon concentrating mechanism.C4'                     |
| 811 | Nitr | 4 | 11351925  | 31.69382335 | 5  | -0.003583568 | 108    | '27.3.2'         | grmzm2g008<br>259_t01 | 'RNA.regulation of transcription.Alfin-like'               |
| 812 | Nitr | 4 | 11970641  | 33.81499619 | 6  | -0.003758507 | 15538  | '27.4'           | grmzm2g010<br>056_t02 | 'RNA.RNA binding'                                          |
| 813 | Nitr | 4 | 25849988  | 48.23626239 | 5  | 0.001059419  | 7700   | '29.5.11. 4.5.2' | grmzm2g026<br>724_t01 | 'protein.degradation.ubiquitin.E3.BTB/POZ Cullin3.BTB/POZ' |
| 814 | Nitr | 4 | 25850469  | 48.23645002 | 7  | 0.001284805  | 7219   | '29.5.11. 4.5.2' | grmzm2g026<br>724_t01 | 'protein.degradation.ubiquitin.E3.BTB/POZ Cullin3.BTB/POZ' |
| 815 | Nitr | 4 | 28177658  | 49.14422457 | 25 | 0.002716247  | 9566   | '27.3.99'        | grmzm2g426<br>591_t01 | 'RNA.regulation of transcription.unclassified'             |
| 816 | Nitr | 4 | 28839372  | 49.4032225  | 7  | 0.005200168  | 130032 | '27.1.19'        | grmzm2g064<br>868_t01 | 'RNA.processing.ribonucleases'                             |

|     |      |   |           |             |    |              |        |                     |                       |                                                                        |
|-----|------|---|-----------|-------------|----|--------------|--------|---------------------|-----------------------|------------------------------------------------------------------------|
| 817 | Nitr | 4 | 101964449 | 57.85755427 | 9  | 0.003029113  | 163162 | '34.10'             | grmzm2g144<br>254_t01 | 'transport.nucleotides'                                                |
| 818 | Nitr | 4 | 110010755 | 58.02556787 | 12 | 0.001209715  | 279193 | '29.2.1.2<br>.2.14' | grmzm2g323<br>971_t01 | 'protein.synthesis.ribosomal<br>protein.eukaryotic.60S<br>subunit.L14' |
| 819 | Nitr | 4 | 130200550 | 58.67643598 | 10 | 0.001469707  | 262479 | '29.5.3'            | grmzm2g139<br>670_t01 | 'protein.degradation.cysteine<br>protease'                             |
| 820 | Nitr | 4 | 149531302 | 61.9954463  | 8  | 0.004684307  | 57230  | '33.2'              | grmzm2g100<br>716_t01 | 'development.late<br>embryogenesis abundant'                           |
| 821 | Nitr | 4 | 163054280 | 73.24125003 | 10 | -0.002480041 | 30403  | '27.3.99'           | grmzm2g168<br>431_t01 | 'RNA.regulation of<br>transcription.unclassified<br>'                  |
| 822 | Nitr | 4 | 163084391 | 73.26227648 | 17 | -0.002987557 | 292    | '27.3.99'           | grmzm2g168<br>431_t01 | 'RNA.regulation of<br>transcription.unclassified<br>'                  |
| 823 | Nitr | 4 | 165718843 | 75.10190893 | 25 | -0.003343143 | 145429 | '29.5'              | grmzm2g380<br>457_t01 | 'protein.degradation'                                                  |
| 824 | Nitr | 4 | 166175217 | 75.86       | 5  | -0.0009      | 36325  | '31.1'              | grmzm2g136<br>996_t01 | 'cell.organisation'                                                    |
| 825 | Nitr | 4 | 167831848 | 76.66597097 | 7  | -0.002511466 | 2055   | '2.2.1.5'           | grmzm2g045<br>171_t01 | 'major CHO<br>metabolism.degradation.<br>sucrose.Susy'                 |

|     |      |   |           |             |    |              |                 |                       |                                                                            |
|-----|------|---|-----------|-------------|----|--------------|-----------------|-----------------------|----------------------------------------------------------------------------|
| 826 | Nitr | 4 | 170457980 | 78.38642641 | 8  | -0.002662805 | 5944 '27.3.40'  | grmzm2g142<br>768_t01 | 'RNA.regulation of<br>transcription.Aux/IAA<br>family'                     |
| 827 | Nitr | 4 | 177460609 | 88.85205365 | 6  | -0.000971011 | 80869 '29.1.15' | grmzm2g170<br>313_t01 | 'protein.aa<br>activation.proline-tRNA<br>ligase'                          |
| 828 | Nitr | 4 | 179532567 | 92.44677404 | 28 | -0.002935932 | 52215 '20.2.3'  | grmzm2g000<br>764_t01 | 'stress.abiotic.drought/sal<br>t'                                          |
| 829 | Nitr | 4 | 242018406 | 128.094256  | 5  | -0.026531277 | 6470 '30.2.17'  | grmzm2g169<br>020_t01 | 'signalling.receptor<br>kinases.DUF 26'                                    |
| 830 | Nitr | 4 | 242343398 | 129.4163957 | 6  | 0.793685036  | 2086 '30.5'     | grmzm2g101<br>920_t01 | 'signalling.G-proteins'                                                    |
| 831 | Nitr | 5 | 4862213   | 16.72130612 | 9  | 0.003196165  | 40910 '27.3.29' | grmzm2g089<br>361_t01 | 'RNA.regulation of<br>transcription.TCP<br>transcription factor<br>family' |
| 832 | Nitr | 5 | 4925927   | 17.04607872 | 10 | 0.002167269  | 4371 '27.3.11'  | grmzm2g089<br>448_t01 | 'RNA.regulation of<br>transcription.C2H2 zinc<br>finger family'            |
| 833 | Nitr | 5 | 7664787   | 29.12019513 | 5  | 0.001140887  | 15178 '29.4'    | grmzm2g350<br>844_t01 | 'protein.postranslational<br>modification'                                 |
| 834 | Nitr | 5 | 162808563 | 76.42708275 | 6  | 0.003808286  | 57372 '31.1'    | grmzm2g474<br>531_t01 | 'cell.organisation'                                                        |
| 835 | Nitr | 5 | 184229490 | 93.51868254 | 5  | 0.001723644  | 166972 '29.4'   | grmzm2g463<br>711_t01 | 'protein.postranslational<br>modification'                                 |
| 836 | Nitr | 5 | 184794208 | 94.16914109 | 6  | 0.001178069  | 36189 '34.5'    | grmzm2g028<br>736_t01 | 'transport.ammonium'                                                       |

|     |      |   |           |             |    |              |        |           |                       |                                                                                     |
|-----|------|---|-----------|-------------|----|--------------|--------|-----------|-----------------------|-------------------------------------------------------------------------------------|
| 837 | Nitr | 5 | 185030768 | 94.44161776 | 7  | 0.001440241  | 232883 | '8.1.6'   | grmzm2g064<br>695_t01 | 'TCA / org.<br>transformation.TCA.succ<br>inyl-CoA ligase'                          |
| 838 | Nitr | 5 | 185056309 | 94.47103662 | 10 | 0.001491703  | 207342 | '8.1.6'   | grmzm2g064<br>695_t01 | 'TCA / org.<br>transformation.TCA.succ<br>inyl-CoA ligase'                          |
| 839 | Nitr | 5 | 185687667 | 95.19825306 | 8  | 0.001158127  | 11103  | '23.3.2.1 | grmzm2g540<br>538_t01 | 'nucleotide<br>metabolism.salvage.nucl<br>eoside kinases.adenosine<br>kinase'       |
| 840 | Nitr | 5 | 185860200 | 95.39698157 | 5  | 0.000263629  | 1356   | '16.2.1.1 | grmzm2g074<br>604_t03 | 'secondary<br>metabolism.phenylpropa<br>noids.lignin<br>biosynthesis.PAL'           |
| 841 | Nitr | 5 | 190089272 | 99.5622766  | 29 | -0.023979728 | 139380 | '31.4'    | grmzm2g171<br>406_t01 | 'cell.vesicle transport'                                                            |
| 842 | Nitr | 5 | 190169366 | 99.64088567 | 25 | -0.032819686 | 59286  | '31.4'    | grmzm2g171<br>406_t01 | 'cell.vesicle transport'                                                            |
| 843 | Nitr | 5 | 190751918 | 100.0087423 | 59 | 0.060946443  | 96857  | '17.5.2'  | grmzm2g071<br>844_t01 | 'hormone<br>metabolism.ethylene.sig<br>nal transduction'                            |
| 844 | Nitr | 5 | 191728507 | 101.2378277 | 61 | -0.033148662 | 4216   | '11.9.4.5 | grmzm2g306<br>566_t01 | 'lipid metabolism.lipid<br>degradation.beta-<br>oxidation.acyl-CoA<br>thioesterase' |

|          |   |           |             |    |              |                         |                       |                                                                                               |
|----------|---|-----------|-------------|----|--------------|-------------------------|-----------------------|-----------------------------------------------------------------------------------------------|
| 845 Nitr | 5 | 205478714 | 119.252956  | 9  | -0.001744117 | 11175 '27.3.25'         | grmzm2g053<br>396_t01 | 'RNA.regulation of<br>transcription.MYB<br>domain transcription<br>factor family'             |
| 846 Nitr | 5 | 205662825 | 119.8501543 | 20 | -0.001468083 | 95037 '10.7'            | grmzm2g105<br>844_t01 | 'cell wall.modification'                                                                      |
| 847 Nitr | 5 | 205964077 | 120.8273212 | 11 | -0.000771887 | 14845 '33.99'           | grmzm2g380<br>177_t01 | 'development.unspecifie<br>d'                                                                 |
| 848 Nitr | 5 | 207101210 | 124.0824263 | 25 | -0.003509329 | 17 '3.2.2'              | grmzm2g055<br>150_t01 | 'minor CHO<br>metabolism.trehalose.TP<br>P'                                                   |
| 849 Nitr | 5 | 207118376 | 124.1210629 | 12 | -0.000821003 | 772 '27.3.7'            | grmzm2g041<br>991_t01 | 'RNA.regulation of<br>transcription.C2C2(Zn)<br>CO-like, Constans-like<br>zinc finger family' |
| 850 Nitr | 5 | 207498927 | 124.9743369 | 13 | -0.003573299 | 25119 '26.7'            | grmzm2g059<br>958_t01 | 'misc.oxidases - copper,<br>flavone etc.'                                                     |
| 851 Nitr | 5 | 211861691 | 137.9485929 | 9  | -0.00209302  | '29.5.11.<br>18788 4.2' | grmzm2g089<br>466_t01 | 'protein.degradation.ubiq<br>uitin.E3.RING'                                                   |

|          |   |           |             |    |              |                  |                       |                                                                                   |
|----------|---|-----------|-------------|----|--------------|------------------|-----------------------|-----------------------------------------------------------------------------------|
| 852 Nitr | 6 | 78467563  | 11.02628868 | 8  | 0.00613447   | 288186 '27.3.40' | grmzm2g000<br>158_t01 | 'RNA.regulation of<br>transcription.Aux/IAA<br>family'                            |
| 853 Nitr | 6 | 92041721  | 18.74190429 | 8  | -0.007360541 | 27147 '18.1'     | grmzm2g061<br>821_t01 | 'Co-factor and vitamine<br>metabolism.molybdenum<br>cofactor'                     |
| 854 Nitr | 6 | 164046344 | 96.23353408 | 8  | 0.00311268   | 24836 '1.1.2.2'  | grmzm2g451<br>224_t01 | 'PS.lightreaction.photosy<br>stem I.PSI polypeptide<br>subunits'                  |
| 855 Nitr | 7 | 94080369  | 50.29845615 | 7  | -0.002187415 | 354 '21.2.1'     | grmzm2g064<br>106_t01 | 'redox.ascorbate and<br>glutathione.ascorbate'<br>'cell'                          |
| 856 Nitr | 7 | 97073633  | 50.59965001 | 5  | -0.003762497 | 160838 '10.8.2'  | grmzm2g113<br>750_t01 | wall.pectin*esterases.ace<br>tyl esterase'                                        |
| 857 Nitr | 7 | 121206635 | 61.30136801 | 7  | 0.003846053  | 23516 '24'       | grmzm2g420<br>786_t01 | 'Biodegradation of<br>Xenobiotics'                                                |
| 858 Nitr | 7 | 145280969 | 83.18936747 | 6  | 0.000758506  | 5515 '30.2.99'   | grmzm2g163<br>138_t01 | 'signalling.receptor<br>kinases.misc'                                             |
| 859 Nitr | 7 | 152493835 | 91.25002624 | 19 | 0.000787893  | 75899 '27.3.27'  | grmzm2g179<br>885_t01 | 'RNA.regulation of<br>transcription.NAC<br>domain transcription<br>factor family' |
| 860 Nitr | 8 | 20733895  | 45.60822058 | 7  | 0.002081662  | 128438 '27.3.27' | grmzm2g112<br>681_t01 | 'RNA.regulation of<br>transcription.NAC<br>domain transcription<br>factor family' |

|          |   |           |             |    |              |                             |                       |                                                                                            |
|----------|---|-----------|-------------|----|--------------|-----------------------------|-----------------------|--------------------------------------------------------------------------------------------|
| 861 Nitr | 8 | 139383376 | 71.29644034 | 13 | -0.004157906 | '29.2.1.1<br>33360 .3.2.35' | grmzm2g423<br>169_t01 | 'protein.synthesis.ribosomal<br>protein.prokaryotic.unknown organellar.50S<br>subunit.L35' |
| 862 Nitr | 8 | 147013249 | 76.63825194 | 16 | 0.004700156  | 35582 '18.7'                | grmzm2g064<br>336_t01 | 'Co-factor and vitamins<br>metabolism.iron-sulphur<br>clusters'                            |
| 863 Nitr | 8 | 150840981 | 79.70937466 | 9  | 0.002809057  | 99103 '29.4'                | grmzm2g518<br>717_t01 | 'protein.posttranslational<br>modification'                                                |
| 864 Nitr | 8 | 160985585 | 90.37557478 | 10 | -0.000844257 | 225188 '31.4'               | grmzm2g031<br>352_t02 | 'cell.vesicle transport'                                                                   |
| 865 Nitr | 9 | 23279446  | 40.13731735 | 8  | -0.000527851 | 199835 '22.1.3'             | grmzm2g396<br>553_t01 | 'polyamine<br>metabolism.synthesis.arginine<br>decarboxylase'                              |
| 866 Nitr | 9 | 23407123  | 40.42055726 | 5  | -0.000732831 | 72158 '22.1.3'              | grmzm2g396<br>553_t01 | 'polyamine<br>metabolism.synthesis.arginine<br>decarboxylase'                              |
| 867 Nitr | 9 | 25029010  | 42.41502107 | 13 | -0.000589684 | 10953 '30.2.16'             | grmzm2g335<br>052_t01 | 'signalling.receptor<br>kinases.Catharanthus<br>roseus-like RLK1'                          |
| 868 Nitr | 9 | 121495902 | 60.17794088 | 5  | -0.000866371 | 22322 '31.1'                | grmzm2g343<br>856_t01 | 'cell.organisation'                                                                        |



|     |      |    |           |             |    |              |        |                 |                       |                                                                              |
|-----|------|----|-----------|-------------|----|--------------|--------|-----------------|-----------------------|------------------------------------------------------------------------------|
| 869 | Nitr | 9  | 151011382 | 109.2060086 | 64 | 0.003263514  | 14303  | '16.8.4'        | grmzm2g168<br>355_t01 | 'secondary<br>metabolism.flavonoids.fl<br>avonols'                           |
| 870 | Nitr | 10 | 146509918 | 91.0233194  | 8  | 0.000766245  | 1082   | '17.2.3'        | grmzm2g442<br>000_t01 | 'hormone<br>metabolism.auxin.induce<br>d-regulated-responsive-<br>activated' |
| 871 | Nitr | 10 | 146628442 | 91.61626493 | 10 | 0.000710638  | 28850  | '27.3.4'        | grmzm2g086<br>949_t01 | 'RNA.regulation of<br>transcription.ARF,<br>Auxin Response Factor<br>family' |
| 872 | Nitr | 10 | 146744873 | 92.26893726 | 17 | 0.000679393  | 201    | '26.5'          | grmzm2g125<br>083_t01 | 'misc.acyl transferases'                                                     |
| 873 | Nitr | 10 | 147132717 | 94.44305795 | 6  | 0.000722548  | 989    | '26.7'          | grmzm2g150<br>248_t02 | 'misc.oxidases - copper,<br>flavone etc.'                                    |
| 874 | Nitr | 10 | 147981037 | 99.19844948 | 12 | 0.000848392  | 36945  | '23.2'          | grmzm2g173<br>413_t01 | 'nucleotide<br>metabolism.degradation'                                       |
| 875 | Nitr | 10 | 148513914 | 102.1855755 | 14 | 0.000913186  | 91418  | '23.1.2.3<br>1' | grmzm2g136<br>283_t01 | 'nucleotide<br>metabolism.synthesis.pur<br>ine.GMP synthetase'               |
| 876 | Prot | 1  | 64910659  | 74.0301357  | 9  | -0.006095916 | 75579  | '34.3'          | grmzm2g127<br>138_t01 | 'transport.amino acids'                                                      |
| 877 | Prot | 1  | 64910976  | 74.03036785 | 33 | -0.006371905 | 75262  | '34.3'          | grmzm2g127<br>138_t01 | 'transport.amino acids'                                                      |
| 878 | Prot | 1  | 69196228  | 76.41372859 | 13 | -0.006630505 | 153059 | '26.2'          | grmzm2g123<br>872_t01 | 'misc.UDP glucosyl and<br>glucoronyl transferases'                           |

|          |   |           |              |    |              |                          |                       |                                                                                                                         |
|----------|---|-----------|--------------|----|--------------|--------------------------|-----------------------|-------------------------------------------------------------------------------------------------------------------------|
| 879 Prot | 1 | 69271066  | 76.45177556  | 5  | -0.007173736 | 78221 '26.2'             | grmzm2g123<br>872_t01 | 'misc.UDP glucosyl and<br>glucoronyl transferases'                                                                      |
| 880 Prot | 1 | 74985643  | 79.35701503  | 8  | -0.015969066 | 76392 '33.99'            | grmzm2g075<br>892_t01 | 'development.unspecifie<br>d'                                                                                           |
| 881 Prot | 1 | 252882663 | 149.8292876  | 8  | 0.008583908  | 111731 '28.1'            | grmzm2g099<br>023_t01 | 'DNA.synthesis/chromati<br>n structure'<br>'amino acid<br>metabolism.degradation.<br>aspartate                          |
| 882 Prot | 2 | 20043374  | 50.80064207  | 26 | -0.006974803 | '13.2.3.1<br>71742 .1'   | grmzm2g139<br>463_t01 | family.asparagine.L-<br>asparaginase'<br>'RNA.regulation of<br>transcription.bHLH,Basi<br>c Helix-Loop-Helix<br>family' |
| 883 Prot | 2 | 185457136 | 96.16151574  | 6  | 0.006649714  | 33924 '27.3.6'           | grmzm2g137<br>541_t01 | 'RNA.regulation of<br>transcription.putative<br>transcription regulator'                                                |
| 884 Prot | 3 | 1187527   | -0.271888706 | 19 | 0.008814859  | 43949 '27.3.67'          | ac233880.1_f<br>gt005 |                                                                                                                         |
| 885 Prot | 3 | 127883944 | 61.0242801   | 19 | -0.009978835 | 273423 '29.4'            | ac206425.3_f<br>gt004 | 'protein.postranslational<br>modification'                                                                              |
| 886 Prot | 3 | 127884222 | 61.02430232  | 7  | -0.008779638 | 273145 '29.4'            | ac206425.3_f<br>gt004 | 'protein.postranslational<br>modification'                                                                              |
| 887 Prot | 3 | 131786653 | 61.68464041  | 6  | -0.014158624 | '29.2.1.2<br>92704 .1.9' | grmzm2g108<br>348_t01 | 'protein.synthesis.riboso<br>mal<br>protein.eukaryotic.40S<br>subunit.S9'                                               |
| 888 Prot | 3 | 179931178 | 91.94664886  | 37 | -0.006464741 | 8299 '28.99'             | grmzm2g359<br>230_t01 | 'DNA.unspecified'                                                                                                       |

|          |   |           |             |    |              |                 |                       |                                                                                     |
|----------|---|-----------|-------------|----|--------------|-----------------|-----------------------|-------------------------------------------------------------------------------------|
| 889 Prot | 3 | 186207858 | 97.81793168 | 13 | -0.009426898 | 69471 '10.6.3'  | ac213654.3_f<br>gt006 | 'cell<br>wall.degradation.pectate<br>lyases and<br>polygalacturonases'              |
| 890 Prot | 3 | 186596173 | 98.06048224 | 5  | -0.00757709  | 38992 '20.1'    | grmzm2g047<br>652_t01 | 'stress.biotic'                                                                     |
| 891 Prot | 3 | 188565185 | 99.29037279 | 6  | -0.006679739 | 4457 '11.8'     | grmzm2g138<br>800_t01 | 'lipid<br>metabolism."exotics"<br>(steroids, squalene etc)'                         |
| 892 Prot | 3 | 203411410 | 111.3198505 | 6  | -0.006026391 | 94226 '34.99'   | grmzm2g057<br>283_t01 | 'transport.misc'                                                                    |
| 893 Prot | 3 | 212222986 | 123.2720269 | 21 | -0.006839459 | 21610 '16.7'    | grmzm2g349<br>407_t01 | 'secondary<br>metabolism.wax'                                                       |
| 894 Prot | 3 | 212224642 | 123.2740932 | 16 | -0.007350952 | 19954 '16.7'    | grmzm2g349<br>407_t01 | 'secondary<br>metabolism.wax'                                                       |
| 895 Prot | 3 | 213226535 | 125.1288155 | 17 | -0.008878007 | 55830 '27.3.22' | grmzm2g126<br>239_t01 | 'RNA.regulation of<br>transcription.HB,Homeo<br>box transcription factor<br>family' |
| 896 Prot | 3 | 213800913 | 126.5396432 | 5  | -0.007297196 | 1704 '26.2'     | grmzm2g048<br>010_t01 | 'misc.UDP glucosyl and<br>glucuronyl transferases'                                  |
| 897 Prot | 3 | 213854238 | 126.6706238 | 9  | -0.007474129 | 34661 '1.5.1'   | grmzm2g121<br>878_t01 | 'PS.carbon concentrating<br>mechanism.C4'                                           |
| 898 Prot | 3 | 217611213 | 133.5696863 | 6  | -0.008173794 | 7638 '28.99'    | grmzm2g081<br>924_t01 | 'DNA.unspecified'                                                                   |

|          |   |           |             |    |              |                |                                 |                                                                                                                        |
|----------|---|-----------|-------------|----|--------------|----------------|---------------------------------|------------------------------------------------------------------------------------------------------------------------|
| 899 Prot | 4 | 168096468 | 76.74550042 | 5  | -0.013008569 | 5907 '34.13'   | grmzm2g019<br>209_t01           | 'transport.peptides and<br>oligopeptides'                                                                              |
| 900 Prot | 4 | 227245511 | 112.6233194 | 44 | 0.009730652  | 127854 '26.16' | grmzm2g142<br>037_t01           | 'misc.myrosinases-lectin-<br>jacalin'                                                                                  |
| 901 Prot | 4 | 230742777 | 113.8187579 | 6  | 0.008891322  | 130027 '34.22' | grmzm2g148<br>118_t01           | 'transport.cyclic<br>nucleotide or calcium<br>regulated channels'                                                      |
| 902 Prot | 5 | 88557383  | 69.4927261  | 74 | -0.007848454 | 46768 '27.1'   | grmzm2g058<br>252_t01           | 'RNA.processing'                                                                                                       |
| 903 Prot | 5 | 91037740  | 69.69522773 | 20 | -0.006780225 | 43217 '29.4'   | grmzm2g360<br>455_t01           | 'protein.postranslational<br>modification'                                                                             |
| 904 Prot | 5 | 186016180 | 95.57664385 | 5  | -0.00735679  | 4372 '34.22'   | grmzm2g068<br>904_t01           | 'transport.cyclic<br>nucleotide or calcium<br>regulated channels'                                                      |
| 905 Prot | 5 | 187955512 | 97.81042264 | 8  | -0.005429395 | 5456 '27.3.3'  | grmzm2g139<br>765_t01           | 'RNA.regulation of<br>transcription.AP2/EREB<br>P, APETALA2/Ethylene-<br>responsive element<br>binding protein family' |
| 906 Prot | 5 | 189228254 | 98.86708725 | 21 | -0.007553606 | 16596 4.2'     | '29.5.11. grmzm2g409<br>372_t01 | 'protein.degradation.ubiq<br>uitin.E3.RING'                                                                            |
| 907 Prot | 5 | 203170982 | 112.0815943 | 20 | -0.006893258 | 35767 '34.3'   | grmzm2g161<br>641_t01           | 'transport.amino acids'                                                                                                |

|          |   |           |             |    |              |        |               |                       |                                                                                                        |
|----------|---|-----------|-------------|----|--------------|--------|---------------|-----------------------|--------------------------------------------------------------------------------------------------------|
| 908 Prot | 5 | 205646722 | 119.7979212 | 18 | -0.005971484 | 111140 | '10.7'        | grmzm2g105<br>844_t01 | 'cell wall.modification'<br>'RNA.regulation of<br>transcription.TCP<br>transcription factor<br>family' |
| 909 Prot | 5 | 206043601 | 121.085272  | 6  | -0.006353574 | 14566  | '27.3.29'     | grmzm2g077<br>755_t01 |                                                                                                        |
| 910 Prot | 5 | 208092874 | 126.5365424 | 6  | -0.005967461 | 26539  | '29.5.11.4.2' | grmzm2g323<br>013_t01 | 'protein.degradation.ubiq<br>uitin.E3.RING'                                                            |
| 911 Prot | 6 | 22422464  | 7.104655221 | 26 | -0.006334214 | 488912 | '30.2.17'     | grmzm2g179<br>270_t01 | 'signalling.receptor<br>kinases.DUF 26'                                                                |
| 912 Prot | 6 | 35896471  | 8.2773635   | 5  | -0.005965884 | 200355 | '27.1.19'     | grmzm2g124<br>509_t01 | 'RNA.processing.ribonuc<br>leases'                                                                     |
| 913 Prot | 6 | 72931425  | 10.26780431 | 14 | -0.004869067 | 51246  | '27.1.19'     | grmzm2g047<br>265_t01 | 'RNA.processing.ribonuc<br>leases'                                                                     |
| 914 Prot | 6 | 72985636  | 10.2733065  | 9  | -0.004940372 | 111093 | '29.5.11.4.2' | grmzm2g430<br>152_t01 | 'protein.degradation.ubiq<br>uitin.E3.RING'                                                            |
| 915 Prot | 6 | 73021951  | 10.27699232 | 13 | -0.0080408   | 74778  | '29.5.11.4.2' | grmzm2g430<br>152_t01 | 'protein.degradation.ubiq<br>uitin.E3.RING'                                                            |
| 916 Prot | 6 | 168683648 | 108.6048676 | 13 | 0.011314553  | 124170 | '27.3.25'     | grmzm2g440<br>349_t01 | 'RNA.regulation of<br>transcription.MYB<br>domain transcription<br>factor family'                      |

|          |   |           |             |    |              |                       |                       |                                                                                                 |
|----------|---|-----------|-------------|----|--------------|-----------------------|-----------------------|-------------------------------------------------------------------------------------------------|
| 917 Prot | 6 | 168748906 | 108.622076  | 35 | 0.007222797  | 58912 '27.3.25'       | grmzm2g440<br>349_t01 | 'RNA.regulation of<br>transcription.MYB<br>domain transcription<br>factor family'               |
| 918 Prot | 7 | 5099065   | 21.78417429 | 9  | -0.008417978 | 1869 '7.3'            | grmzm2g011<br>858_t01 | 'OPP.electron transfer'                                                                         |
| 919 Prot | 7 | 33595519  | 47.99555999 | 10 | 0.00514782   | 68338 '20.1'          | grmzm2g080<br>547_t01 | 'stress.biotic'                                                                                 |
| 920 Prot | 7 | 154247787 | 94.54909037 | 7  | 0.005825457  | 17893 '34.2'          | grmzm2g007<br>909_t01 | 'transport.sugars'                                                                              |
| 921 Prot | 7 | 157249277 | 100.7051801 | 14 | 0.006706373  | 24576 '29.4'          | grmzm2g432<br>796_t01 | 'protein.postranslational<br>modification'                                                      |
| 922 Prot | 7 | 158036207 | 102.3366246 | 5  | 0.005791282  | '29.4.1.5<br>62508 7' | grmzm2g017<br>409_t01 | 'protein.postranslational<br>modification.kinase.rece<br>ptor like cytoplasmatic<br>kinase VII' |
| 923 Prot | 7 | 159778542 | 106.10253   | 6  | 0.012461708  | 2042 '30.11'          | grmzm2g114<br>461_t01 | 'signalling.light'                                                                              |
| 924 Prot | 7 | 168378312 | 131.3238192 | 8  | -0.007477326 | 31103 '3.1.1.2'       | grmzm2g361<br>984_t01 | 'minor CHO<br>metabolism.raffinose<br>family.galactinol<br>synthases.putative'                  |
| 925 Prot | 8 | 21881574  | 47.44607971 | 10 | 0.011659826  | 27167 '29.2.3'        | grmzm2g033<br>283_t01 | 'protein.synthesis.initiati<br>on'                                                              |

|          |   |           |             |    |              |                           |                       |                                                                                                                              |
|----------|---|-----------|-------------|----|--------------|---------------------------|-----------------------|------------------------------------------------------------------------------------------------------------------------------|
| 926 Prot | 8 | 108880988 | 60.59133569 | 5  | 0.008562491  | 159905 '33.99'            | grmzm2g101<br>852_t01 | 'development.unspecific<br>d'                                                                                                |
| 927 Prot | 8 | 115683038 | 62.57820324 | 5  | 0.008392785  | '29.4.1.5<br>119756 7'    | grmzm2g090<br>732_t01 | 'protein.postranslational<br>modification.kinase.rece<br>ptor like cytoplasmatic<br>kinase VII'                              |
| 928 Prot | 8 | 117977083 | 63.86243699 | 51 | 0.01116072   | '29.2.1.2<br>2390 .2.24'  | grmzm2g142<br>640_t01 | 'protein.synthesis.riboso<br>mal<br>protein.eukaryotic.60S<br>subunit.L24'                                                   |
| 929 Prot | 8 | 129392376 | 68.26348656 | 8  | 0.009582417  | 111977 '27.3.22'          | grmzm2g094<br>241_t01 | 'RNA.regulation of<br>transcription.HB,Homeo<br>box transcription factor<br>family'                                          |
| 930 Prot | 8 | 131868393 | 69.1089486  | 5  | -0.007281874 | 1759 '29.4'               | grmzm2g005<br>350_t01 | 'protein.postranslational<br>modification'<br>'RNA.regulation of<br>transcription.bHLH,Basi<br>c Helix-Loop-Helix<br>family' |
| 931 Prot | 8 | 161242940 | 90.87698678 | 53 | -0.005415146 | 18253 '27.3.6'            | grmzm2g030<br>762_t02 |                                                                                                                              |
| 932 Prot | 8 | 170967906 | 124.4926125 | 15 | -0.010060425 | 3673 '29.5.4'             | grmzm2g133<br>029_t01 | 'protein.degradation.aspa<br>rtate protease'                                                                                 |
| 933 Prot | 9 | 73386482  | 45.90639706 | 5  | -0.006073526 | '29.2.1.2<br>96108 .2.11' | grmzm2g001<br>816_t01 | 'protein.synthesis.riboso<br>mal<br>protein.eukaryotic.60S<br>subunit.L11'                                                   |

|          |   |           |             |    |              |                  |                       |                                                                          |
|----------|---|-----------|-------------|----|--------------|------------------|-----------------------|--------------------------------------------------------------------------|
| 934 Prot | 9 | 75752943  | 46.01866137 | 10 | -0.00678119  | 100423 '27.3.55' | grmzm2g008<br>425_t01 | 'RNA.regulation of<br>transcription.HDA'                                 |
| 935 Prot | 9 | 86122013  | 46.66594904 | 22 | -0.007718805 | 164316 '27.3.50' | grmzm2g058<br>336_t01 | 'RNA.regulation of<br>transcription.General<br>Transcription'            |
| 936 Prot | 9 | 98709960  | 49.58225494 | 8  | -0.00680033  | 83560 '27.3.11'  | grmzm2g436<br>344_t01 | 'RNA.regulation of<br>transcription.C2H2 zinc<br>finger family'          |
| 937 Prot | 9 | 112772173 | 55.72841749 | 8  | -0.006998869 | 98887 '10.7'     | grmzm2g059<br>785_t01 | 'cell wall.modification'                                                 |
| 938 Prot | 9 | 113322955 | 55.98017627 | 24 | -0.006456001 | 431 '27.3.11'    | grmzm2g152<br>214_t01 | 'RNA.regulation of<br>transcription.C2H2 zinc<br>finger family'          |
| 939 Prot | 9 | 113731726 | 56.16702277 | 6  | -0.00865215  | 12533 '10.8.2'   | grmzm2g117<br>999_t02 | 'cell<br>wall.pectin*esterases.ace<br>tyl esterase'                      |
| 940 Prot | 9 | 120621679 | 59.56922799 | 5  | -0.00678539  | 54616 '30.3'     | grmzm2g047<br>546_t04 | 'signalling.calcium'                                                     |
| 941 Prot | 9 | 122100192 | 60.59870208 | 5  | -0.007751436 | 24620 '27.3.67'  | grmzm2g127<br>340_t01 | 'RNA.regulation of<br>transcription.putative<br>transcription regulator' |
| 942 Prot | 9 | 143538206 | 90.82527553 | 10 | -0.007521104 | 8910 '10.6.2'    | grmzm2g048<br>375_t05 | 'cell<br>wall.degradation.mannan-<br>xylose-arabinose-fucose'            |



|          |    |           |             |    |              |                       |                       |                                                |
|----------|----|-----------|-------------|----|--------------|-----------------------|-----------------------|------------------------------------------------|
| 943 Prot | 9  | 144829091 | 93.82411792 | 25 | -0.004785192 | '29.5.11. 8178 4.2'   | grmzm2g004<br>157_t01 | 'protein.degradation.ubiquitin.E3.RING'        |
| 944 Prot | 10 | 10440954  | 28.50645685 | 9  | -0.008130968 | 190947 '34.3'         | grmzm2g076<br>593_t01 | 'transport.amino acids'                        |
| 945 Prot | 10 | 16919807  | 33.52470383 | 16 | 0.007567347  | 64360 '20.2.1'        | grmzm2g170<br>027_t01 | 'stress.abiotic.heat'                          |
| 946 Prot | 10 | 147427851 | 96.09747813 | 13 | 0.004748578  | 1997 '1.1.1.1'        | grmzm2g092<br>427_t01 | 'PS.lightreaction.photosystem II.LHC-II'       |
| 947 Prot | 10 | 148213790 | 100.5031831 | 11 | 0.006813955  | 64402 '27.1.19'       | grmzm2g177<br>340_t01 | 'RNA.processing.ribonucleases'                 |
| 948 Prot | 10 | 148344527 | 101.23605   | 45 | 0.008225195  | 4374 '20.1'           | grmzm2g406<br>119_t01 | 'stress.biotic'                                |
| 949 Prot | 10 | 148496242 | 102.0865123 | 5  | 0.007112842  | '29.5.11. 4411 4.3.2' | grmzm2g104<br>882_t01 | 'protein.degradation.ubiquitin.E3.SCF.FBOX'    |
| 950 Star | 1  | 7457814   | 13.94852432 | 86 | -0.037258586 | 75819 '30.2.17'       | grmzm2g410<br>991_t02 | 'signalling.receptor kinases.DUF 26'           |
| 951 Star | 1  | 17278764  | 33.6621462  | 5  | -0.041877285 | 39171 '34.99'         | grmzm2g115<br>105_t01 | 'transport.misc'                               |
| 952 Star | 1  | 21382731  | 37.73085137 | 29 | -0.023301274 | 63347 '27.3.99'       | grmzm2g004<br>259_t01 | 'RNA.regulation of transcription.unclassified' |
| 953 Star | 1  | 21383024  | 37.73112289 | 10 | -0.022620507 | 63054 '27.3.99'       | grmzm2g004<br>259_t01 | 'RNA.regulation of transcription.unclassified' |

|     |      |   |          |             |    |             |        |           |                       |                                                                                                |
|-----|------|---|----------|-------------|----|-------------|--------|-----------|-----------------------|------------------------------------------------------------------------------------------------|
| 954 | Star | 1 | 42174991 | 59.32632563 | 11 | 0.051194392 | 109965 | '27.3.11' | grmzm2g048<br>154_t01 | 'RNA.regulation of<br>transcription.C2H2 zinc<br>finger family'                                |
| 955 | Star | 1 | 45528222 | 61.4993069  | 7  | 0.044795124 | 33781  | '34.9'    | ac208201.3_f<br>gt001 | 'transport.metabolite<br>transporters at the<br>mitochondrial<br>membrane'                     |
| 956 | Star | 1 | 46715564 | 62.60388883 | 8  | 0.035909602 | 37723  | '27.1.1'  | grmzm2g153<br>450_t01 | 'RNA.processing.splicin<br>g'                                                                  |
| 957 | Star | 1 | 51113147 | 65.50551539 | 54 | 0.052957455 | 3172   | '9.1.2'   | grmzm2g018<br>941_t01 | 'mitochondrial electron<br>transport / ATP<br>synthesis.NADH-<br>DH.localisation not<br>clear' |
| 958 | Star | 1 | 51531509 | 66.02023986 | 6  | 0.089385584 | 118119 | '3.1.1.2' | grmzm2g165<br>919_t01 | 'minor CHO<br>metabolism.raffinose<br>family.galactinol<br>synthases.putative'                 |
| 959 | Star | 1 | 92753447 | 85.57176721 | 62 | 0.024022074 | 459526 | '29.5.7'  | grmzm2g317<br>386_t01 | 'protein.degradation.met<br>alloprotease'                                                      |
| 960 | Star | 1 | 93661572 | 85.98563614 | 7  | 0.024453663 | 9642   | '10.7'    | grmzm2g021<br>621_t02 | 'cell wall.modification'                                                                       |
| 961 | Star | 1 | 93667548 | 85.98835964 | 6  | 0.024126069 | 3666   | '10.7'    | grmzm2g021<br>621_t02 | 'cell wall.modification'                                                                       |

|     |      |   |           |             |    |              |        |            |                       |                                                                                                                        |
|-----|------|---|-----------|-------------|----|--------------|--------|------------|-----------------------|------------------------------------------------------------------------------------------------------------------------|
| 962 | Star | 1 | 251149118 | 148.8823369 | 5  | -0.048533652 | 22757  | '20.1'     | grmzm2g081<br>099_t01 | 'stress.biotic'                                                                                                        |
| 963 | Star | 1 | 251176189 | 148.8964086 | 90 | -0.057655015 | 13283  | '13.2.2.3' | grmzm2g080<br>828_t01 | 'amino acid<br>metabolism.degradation.<br>glutamate<br>family.arginine'                                                |
| 964 | Star | 1 | 292560966 | 192.501744  | 10 | -0.071069046 | 287    | '10.7'     | grmzm2g368<br>886_t01 | 'cell wall.modification'                                                                                               |
| 965 | Star | 2 | 5548326   | 16.71276385 | 15 | -0.027020805 | 16078  | '27.3.3'   | grmzm2g174<br>917_t01 | 'RNA.regulation of<br>transcription.AP2/EREB<br>P, APETALA2/Ethylene-<br>responsive element<br>binding protein family' |
| 966 | Star | 2 | 5548414   | 16.71309841 | 83 | -0.028470515 | 15990  | '27.3.3'   | grmzm2g174<br>917_t01 | 'RNA.regulation of<br>transcription.AP2/EREB<br>P, APETALA2/Ethylene-<br>responsive element<br>binding protein family' |
| 967 | Star | 2 | 21795122  | 52.9770168  | 8  | -0.021390127 | 30205  | '27.3.7'   | grmzm2g131<br>982_t01 | 'RNA.regulation of<br>transcription.C2C2(Zn)<br>CO-like, Constans-like<br>zinc finger family'                          |
| 968 | Star | 2 | 22808083  | 54.70986501 | 76 | -0.029176947 | 62966  | '29.5.4'   | grmzm2g003<br>784_t01 | 'protein.degradation.aspa<br>rtate protease'                                                                           |
| 969 | Star | 2 | 27790884  | 58.80007957 | 13 | -0.032182719 | 109799 | '27.3.4'   | grmzm2g122<br>614_t01 | 'RNA.regulation of<br>transcription.ARF,<br>Auxin Response Factor<br>family'                                           |

|          |   |           |             |    |              |                             |                       |                                                                                                                                       |
|----------|---|-----------|-------------|----|--------------|-----------------------------|-----------------------|---------------------------------------------------------------------------------------------------------------------------------------|
| 970 Star | 2 | 28788480  | 60.39948962 | 5  | -0.024239309 | 58573 '20.1'                | grmzm2g032<br>602_t01 | 'stress.biotic'                                                                                                                       |
| 971 Star | 2 | 28788620  | 60.39963767 | 12 | -0.023889437 | 58433 '20.1'                | grmzm2g032<br>602_t01 | 'stress.biotic'                                                                                                                       |
| 972 Star | 2 | 28960635  | 60.58154184 | 5  | -0.030823242 | 99412 '9.1.2'               | grmzm2g141<br>605_t01 | 'mitochondrial electron<br>transport / ATP<br>synthesis.NADH-<br>DH.localisation not<br>clear'                                        |
| 973 Star | 2 | 28970761  | 60.59224999 | 8  | -0.031083803 | 89286 '9.1.2'               | grmzm2g141<br>605_t01 | 'mitochondrial electron<br>transport / ATP<br>synthesis.NADH-<br>DH.localisation not<br>clear'                                        |
| 974 Star | 2 | 28972476  | 60.59406358 | 35 | -0.02957084  | 87571 '9.1.2'               | grmzm2g141<br>605_t01 | 'mitochondrial electron<br>transport / ATP<br>synthesis.NADH-<br>DH.localisation not<br>clear'                                        |
| 975 Star | 2 | 107216168 | 76.50296846 | 7  | -0.030529227 | 824 '8.1.1.1'               | grmzm2g033<br>894_t01 | 'TCA / org.<br>transformation.TCA.pyr<br>uvate DH.E1'<br>'hormone<br>metabolism.auxin.induce<br>d-regulated-responsive-<br>activated' |
| 976 Star | 2 | 194191603 | 105.3998294 | 6  | -0.020841194 | 40827 '17.2.3'              | grmzm2g151<br>656_t01 | 'protein.synthesis.riboso<br>mal<br>protein.prokaryotic.unkn<br>own organellar.50S<br>subunit.L28'                                    |
| 977 Star | 2 | 201217096 | 109.0293094 | 10 | -0.026005633 | '29.2.1.1<br>65219 '3.2.28' | grmzm2g319<br>634_t01 | 'protein.synthesis.riboso<br>mal<br>protein.prokaryotic.unkn<br>own organellar.50S<br>subunit.L28'                                    |

|     |      |   |           |             |    |              |       |                 |                       |                                                                               |
|-----|------|---|-----------|-------------|----|--------------|-------|-----------------|-----------------------|-------------------------------------------------------------------------------|
| 978 | Star | 2 | 203650489 | 111.7689321 | 15 | -0.025557901 | 43040 | '27.1'          | grmzm2g099<br>105_t01 | 'RNA.processing'                                                              |
| 979 | Star | 2 | 205289573 | 113.7617273 | 5  | -0.031413614 | 8694  | '29.5.11.2'     | grmzm2g129<br>575_t01 | 'protein.degradation.ubiquitin.E1'                                            |
| 980 | Star | 2 | 205289574 | 113.7617285 | 9  | -0.027499236 | 8693  | '29.5.11.2'     | grmzm2g129<br>575_t01 | 'protein.degradation.ubiquitin.E1'                                            |
| 981 | Star | 2 | 214729037 | 127.4005253 | 5  | -0.017802912 | 97107 | '29.5.5'        | grmzm2g387<br>383_t01 | 'protein.degradation.serine protease'                                         |
| 982 | Star | 2 | 215881188 | 128.7144115 | 7  | -0.017742045 | 29599 | '34.99'         | grmzm2g068<br>220_t01 | 'transport.misc'                                                              |
| 983 | Star | 2 | 217125385 | 130.3224898 | 5  | -0.027701512 | 37889 | '29.5.11.4.3.2' | grmzm2g048<br>661_t01 | 'protein.degradation.ubiquitin.E3.SCF.FBOX'                                   |
| 984 | Star | 2 | 217810072 | 131.5466232 | 5  | -0.0237361   | 68817 | '27.4'          | grmzm2g124<br>809_t01 | 'RNA.RNA binding'                                                             |
| 985 | Star | 3 | 3123500   | 9.745986067 | 7  | 0.038612596  | 192   | '27.3.69'       | grmzm2g085<br>266_t01 | 'RNA.regulation of transcription.SET-domain transcriptional regulator family' |
| 986 | Star | 3 | 3780999   | 13.14827662 | 22 | 0.028169623  | 2780  | '29.7'          | grmzm2g093<br>278_t01 | 'protein.glycosylation'                                                       |

|     |      |   |           |             |    |              |        |           |                       |                                                                                                               |
|-----|------|---|-----------|-------------|----|--------------|--------|-----------|-----------------------|---------------------------------------------------------------------------------------------------------------|
| 987 | Star | 3 | 3836355   | 13.43472146 | 17 | 0.031403613  | 35512  | '34.3'    | grmzm2g146<br>161_t01 | 'transport.amino acids'                                                                                       |
| 988 | Star | 3 | 14416721  | 41.56032683 | 5  | -0.028022937 | 25363  | '20.1'    | grmzm2g062<br>576_t01 | 'stress.biotic'                                                                                               |
| 989 | Star | 3 | 17306447  | 45.29685092 | 89 | -0.032281971 | 20778  | '30.5'    | grmzm2g166<br>064_t01 | 'signalling.G-proteins'                                                                                       |
| 990 | Star | 3 | 51981075  | 56.79858368 | 90 | 0.084784527  | 127495 | '17.5.1'  | grmzm2g363<br>893_t01 | 'hormone<br>metabolism.ethylene.synt<br>hesis-degradation'                                                    |
| 991 | Star | 3 | 170725018 | 81.65819468 | 5  | -0.07741098  | 65257  | '29.7'    | grmzm2g431<br>006_t01 | 'protein.glycosylation'<br>'RNA.regulation of<br>transcription.WRKY<br>domain transcription<br>factor family' |
| 992 | Star | 3 | 178840635 | 90.20644881 | 8  | 0.036888541  | 17640  | '27.3.32' | grmzm2g178<br>671_t01 | 'nucleotide<br>metabolism.phosphotran<br>sfer and<br>pyrophosphatases.misc'                                   |
| 993 | Star | 3 | 192649685 | 100.9866632 | 10 | -0.050036116 | 42671  | '23.4.99' | grmzm2g052<br>816_t01 | 'misc.beta 1,3 glucan<br>hydrolases'                                                                          |
| 994 | Star | 3 | 192874331 | 101.0880183 | 8  | -0.042136484 | 88999  | '26.4'    | grmzm2g162<br>768_t01 | 'misc.beta 1,3 glucan<br>hydrolases'                                                                          |

|           |   |           |             |    |              |                 |                       |                                                                                 |
|-----------|---|-----------|-------------|----|--------------|-----------------|-----------------------|---------------------------------------------------------------------------------|
| 995 Star  | 3 | 192949443 | 101.1219071 | 9  | -0.0571714   | 13887 '26.4'    | grmzm2g162<br>768_t01 | 'misc.beta 1,3 glucan<br>hydrolases'                                            |
| 996 Star  | 3 | 193619852 | 101.4802146 | 6  | -0.049654665 | 18058 '27.3.67' | grmzm2g015<br>881_t01 | 'RNA.regulation of<br>transcription.putative<br>transcription regulator'        |
| 997 Star  | 3 | 193620690 | 101.4814585 | 27 | -0.053595039 | 17220 '27.3.67' | grmzm2g015<br>881_t01 | 'RNA.regulation of<br>transcription.putative<br>transcription regulator'        |
| 998 Star  | 3 | 194144683 | 102.2592936 | 5  | -0.038147905 | 2909 '27.3.8'   | grmzm2g394<br>973_t01 | 'RNA.regulation of<br>transcription.C2C2(Zn)<br>DOF zinc finger family'         |
| 999 Star  | 4 | 24269222  | 47.52251807 | 66 | 0.054432733  | 205777 '17.5.3' | grmzm2g101<br>480_t01 | 'hormone<br>metabolism.ethylene.ind<br>uced-regulated-<br>responsive-activated' |
| 1000 Star | 4 | 26928416  | 48.65692848 | 6  | 0.054001982  | 19119 '1.1.1.2' | grmzm2g174<br>984_t01 | 'PS.lightreaction.photosy<br>stem II.PSII polypeptide<br>subunits'              |
| 1001 Star | 4 | 63204562  | 55.58951138 | 5  | -0.024189406 | 67970 '27.3.29' | grmzm2g062<br>711_t01 | 'RNA.regulation of<br>transcription.TCP<br>transcription factor<br>family'      |
| 1002 Star | 4 | 116242442 | 58.15932573 | 10 | -0.026678988 | 632941 '27.3.5' | grmzm2g096<br>171_t01 | 'RNA.regulation of<br>transcription.ARR'                                        |
| 1003 Star | 4 | 194884222 | 103.0017383 | 8  | -0.034945398 | 12238 '34.14'   | grmzm2g401<br>874_t01 | 'transport.unspecified<br>cations'                                              |

|      |      |   |           |             |    |              |       |                 |                       |                                                                                                  |
|------|------|---|-----------|-------------|----|--------------|-------|-----------------|-----------------------|--------------------------------------------------------------------------------------------------|
| 1004 | Star | 4 | 194952409 | 103.053073  | 8  | -0.027789043 | 48973 | '20.1'          | grmzm2g050<br>959_t01 | 'stress.biotic'                                                                                  |
| 1005 | Star | 4 | 240714112 | 124.303751  | 25 | -0.017633483 | 52492 | '29.5.11'       | grmzm2g037<br>185_t01 | 'protein.degradation.ubiq<br>uitin'                                                              |
| 1006 | Star | 4 | 245062382 | 140.1088204 | 5  | -0.026856027 | 42239 | '31.1'          | grmzm2g169<br>871_t01 | 'cell.organisation'                                                                              |
| 1007 | Star | 4 | 245730715 | 144.0453722 | 15 | -0.017329439 | 4805  | '21.6'          | grmzm2g079<br>348_t01 | 'redox.dismutases and<br>catalases'                                                              |
| 1008 | Star | 4 | 245730944 | 144.0467211 | 11 | -0.017442961 | 4576  | '21.6'          | grmzm2g079<br>348_t01 | 'redox.dismutases and<br>catalases'                                                              |
| 1009 | Star | 4 | 245787531 | 144.3800244 | 15 | -0.026106421 | 60132 | '33.99'         | grmzm2g010<br>372_t01 | 'development.unspecifie<br>d'                                                                    |
| 1010 | Star | 4 | 246077836 | 146.0899515 | 5  | -0.021761826 | 66707 | '27.3.30'       | grmzm2g037<br>128_t02 | 'RNA.regulation of<br>transcription.Trihelix,<br>Triple-Helix<br>transcription factor<br>family' |
| 1011 | Star | 5 | 1529458   | 1.89866854  | 11 | -0.026956905 | 7573  | '29.4.1.5<br>6' | grmzm2g148<br>962_t01 | 'protein.postranslational<br>modification.kinase.rece<br>ptor like cytoplasmatic<br>kinase VI'   |
| 1012 | Star | 5 | 1532216   | 1.906091195 | 16 | -0.020171388 | 4815  | '29.4.1.5<br>6' | grmzm2g148<br>962_t01 | 'protein.postranslational<br>modification.kinase.rece<br>ptor like cytoplasmatic<br>kinase VI'   |



|      |      |   |           |             |    |              |        |                   |                       |                                                                                                 |
|------|------|---|-----------|-------------|----|--------------|--------|-------------------|-----------------------|-------------------------------------------------------------------------------------------------|
| 1013 | Star | 5 | 1735588   | 2.453429899 | 6  | -0.019083198 | 24507  | '21.4'            | grmzm2g053<br>378_t01 | 'redox.glutaredoxins'                                                                           |
| 1014 | Star | 5 | 1879182   | 2.839887002 | 5  | -0.025793792 | 3659   | '28.1'            | grmzm2g398<br>668_t01 | 'DNA.synthesis/chromati<br>n structure'                                                         |
| 1015 | Star | 5 | 20941271  | 51.30637712 | 10 | -0.050307121 | 489    | '27.3.44'         | grmzm2g146<br>041_t04 | 'RNA.regulation of<br>transcription.Chromatin<br>Remodeling Factors'                            |
| 1016 | Star | 5 | 75996032  | 67.01800088 | 5  | 0.071648285  | 42717  | '29.4.1.5<br>7'   | grmzm2g398<br>559_t01 | 'protein.postranslational<br>modification.kinase.rece<br>ptor like cytoplasmatic<br>kinase VII' |
| 1017 | Star | 5 | 96165401  | 69.92179085 | 29 | 0.054394768  | 287647 | '27.3.99'         | grmzm2g119<br>921_t01 | 'RNA.regulation of<br>transcription.unclassified<br>'                                           |
| 1018 | Star | 5 | 145308951 | 72.52912618 | 15 | -0.06568065  | 375787 | '31.4'            | grmzm2g372<br>812_t01 | 'cell.vesicle transport'                                                                        |
| 1019 | Star | 5 | 168868583 | 80.63961419 | 67 | -0.073140188 | 54819  | '29.6'            | grmzm2g039<br>089_t01 | 'protein.folding'                                                                               |
| 1020 | Star | 5 | 171396511 | 83.30241817 | 34 | 0.023072258  | 188322 | '28.2'            | grmzm2g139<br>031_t01 | 'DNA.repair'                                                                                    |
| 1021 | Star | 5 | 174165684 | 85.75501381 | 25 | 0.029476756  | 52182  | '29.5.11.<br>4.2' | grmzm2g331<br>253_t01 | 'protein.degradation.ubiq<br>uitin.E3.RING'                                                     |
| 1022 | Star | 5 | 174821506 | 86.48707371 | 5  | 0.027732203  | 5443   | '30.11'           | grmzm2g105<br>400_t01 | 'signalling.light'                                                                              |

|      |      |   |           |             |    |              |        |              |                       |                                                                              |
|------|------|---|-----------|-------------|----|--------------|--------|--------------|-----------------------|------------------------------------------------------------------------------|
| 1023 | Star | 5 | 193444292 | 102.0960523 | 28 | 0.019728235  | 76235  | '27.3.62'    | grmzm2g013<br>821_t01 | 'RNA.regulation of transcription.Nucleosome/chromatin assembly factor group' |
| 1024 | Star | 5 | 195201674 | 103.5571638 | 6  | 0.019382462  | 57099  | '10.1.10'    | grmzm2g072<br>911_t01 | 'cell wall.precursor synthesis.UDP-glucose 4,6-dehydratase'                  |
| 1025 | Star | 5 | 203772980 | 114.279637  | 34 | 0.032389813  | 4519   | '29.3.4.9 9' | grmzm2g089<br>454_t01 | 'protein.targeting.secretory pathway.unspecified'                            |
| 1026 | Star | 5 | 204520039 | 116.1433154 | 8  | 0.021779461  | 7639   | '10.6.1'     | grmzm2g151<br>257_t01 | 'cell wall.degradation.cellulases and beta -1,4-glucanases'                  |
| 1027 | Star | 5 | 205480420 | 119.2584897 | 23 | 0.024091119  | 9469   | '27.3.25'    | grmzm2g053<br>396_t01 | 'RNA.regulation of transcription.MYB domain transcription factor family'     |
| 1028 | Star | 5 | 207749910 | 125.7434999 | 9  | 0.032228364  | 1083   | '27.4'       | grmzm2g303<br>915_t01 | 'RNA.RNA binding'                                                            |
| 1029 | Star | 6 | 25145461  | 7.801186431 | 11 | -0.069037952 | 24877  | '28.1.3'     | grmzm2g448<br>458_t01 | 'DNA.synthesis/chromatin structure.histone'                                  |
| 1030 | Star | 6 | 118288607 | 43.43874583 | 32 | -0.072025188 | 6156   | '33.99'      | grmzm2g164<br>308_t01 | 'development.unspecified'                                                    |
| 1031 | Star | 6 | 119252741 | 43.97152587 | 16 | -0.049737056 | 181387 | '29.4'       | grmzm2g159<br>953_t01 | 'protein.postranslational modification'                                      |

|      |      |   |           |             |    |              |        |           |                       |                                                          |
|------|------|---|-----------|-------------|----|--------------|--------|-----------|-----------------------|----------------------------------------------------------|
| 1032 | Star | 6 | 156368499 | 74.39513977 | 7  | 0.053819036  | 32885  | '26.4'    | grmzm2g088<br>951_t01 | 'misc.beta 1,3 glucan<br>hydrolases'                     |
| 1033 | Star | 6 | 166337059 | 105.4357129 | 22 | -0.05306977  | 7973   | '31.4'    | grmzm2g438<br>895_t01 | 'cell.vesicle transport'                                 |
| 1034 | Star | 6 | 166977847 | 107.6073304 | 44 | -0.037821131 | 11484  | '29.5.5'  | grmzm2g159<br>016_t01 | 'protein.degradation.seri<br>ne protease'                |
| 1035 | Star | 7 | 18458794  | 44.19878603 | 5  | -0.027460741 | 28908  | '10.2.1'  | grmzm2g424<br>832_t01 | 'cell wall.cellulose<br>synthesis.cellulose<br>synthase' |
| 1036 | Star | 7 | 20248668  | 44.70548997 | 38 | -0.042578673 | 418915 | '33.99'   | ac212570.3_f<br>gt006 | 'development.unspecifie<br>d'                            |
| 1037 | Star | 7 | 20380953  | 44.78804553 | 7  | -0.06171405  | 286630 | '33.99'   | ac212570.3_f<br>gt006 | 'development.unspecifie<br>d'                            |
| 1038 | Star | 7 | 21623347  | 45.56339066 | 5  | -0.02739467  | 135440 | '34.12'   | grmzm2g093<br>276_t01 | 'transport.metal'                                        |
| 1039 | Star | 7 | 25948068  | 46.52566875 | 5  | -0.043273669 | 39876  | '2.1.2.1' | grmzm2g144<br>002_t01 | 'major CHO<br>metabolism.synthesis.sta<br>rch.AGPase'    |

|      |      |   |           |             |    |              |       |                   |                       |                                                                                        |
|------|------|---|-----------|-------------|----|--------------|-------|-------------------|-----------------------|----------------------------------------------------------------------------------------|
| 1040 | Star | 7 | 29953895  | 47.26241735 | 12 | -0.028721815 | 38416 | '33.2'            | grmzm2g053<br>637_t01 | 'development.late<br>embryogenesis abundant'                                           |
| 1041 | Star | 7 | 126449302 | 67.30732758 | 10 | -0.021768781 | 2413  | '29.5.11.<br>4.1' | grmzm2g181<br>378_t01 | 'protein.degradation.ubiq<br>uitin.E3.HECT'                                            |
| 1042 | Star | 7 | 151507555 | 89.39729712 | 9  | -0.032132802 | 1643  | '27.3.25'         | grmzm2g031<br>323_t01 | 'RNA.regulation of<br>transcription.MYB<br>domain transcription<br>factor family'      |
| 1043 | Star | 7 | 151913077 | 90.15766003 | 9  | -0.079858825 | 12823 | '11.8.1'          | grmzm2g057<br>475_t01 | 'lipid<br>metabolism."exotics"<br>(steroids, squalene<br>etc).sphingolipids'           |
| 1044 | Star | 7 | 152316144 | 90.91580158 | 14 | -0.058489035 | 56984 | '27.3.42'         | grmzm2g434<br>301_t02 | 'RNA.regulation of<br>transcription.Bromodom<br>ain proteins'                          |
| 1045 | Star | 7 | 167105793 | 125.7933142 | 15 | 0.059219318  | 584   | '29.4'            | grmzm2g177<br>050_t01 | 'protein.postranslational<br>modification'                                             |
| 1046 | Star | 7 | 168184709 | 130.4823997 | 13 | 0.045148368  | 5553  | '27.3.19'         | grmzm2g151<br>811_t01 | 'RNA.regulation of<br>transcription.EIN3-<br>like(EIL) transcription<br>factor family' |
| 1047 | Star | 7 | 168193557 | 130.520854  | 5  | 0.036616985  | 66536 | '29.5.1'          | grmzm2g059<br>165_t01 | 'protein.degradation.subt<br>ilases'                                                   |
| 1048 | Star | 8 | 121670463 | 65.96008974 | 11 | 0.045441796  | 21053 | '27.3.8'          | ac209819.3_f<br>gt009 | 'RNA.regulation of<br>transcription.C2C2(Zn)<br>DOF zinc finger family'                |

|      |      |   |           |             |    |              |        |                 |                       |                                                                                               |
|------|------|---|-----------|-------------|----|--------------|--------|-----------------|-----------------------|-----------------------------------------------------------------------------------------------|
| 1049 | Star | 8 | 121963051 | 66.1316561  | 6  | 0.042894621  | 23142  | '27.3.37'       | ac234149.1_f<br>gt002 | 'RNA.regulation of<br>transcription.AS2,Lateral<br>Organ Boundaries Gene<br>Family'           |
| 1050 | Star | 8 | 144585092 | 74.43452065 | 10 | -0.055256199 | 64095  | '29.4.1.5<br>5' | grmzm2g017<br>386_t02 | 'protein.postranslational<br>modification.kinase.rece<br>ptor like cytoplasmatic<br>kinase V' |
| 1051 | Star | 8 | 144767036 | 74.6069579  | 5  | -0.056636807 | 38988  | '10.6.3'        | grmzm2g179<br>696_t01 | 'cell<br>wall.degradation.pectate<br>lyases and<br>polygalacturonases'                        |
| 1052 | Star | 8 | 145553053 | 75.35190474 | 19 | -0.047411963 | 136731 | '34.8'          | grmzm2g050<br>003_t01 | 'transport.metabolite<br>transporters at the<br>envelope membrane'                            |
| 1053 | Star | 8 | 149499942 | 78.63341235 | 8  | -0.058651712 | 7548   | '28.1'          | grmzm2g052<br>296_t01 | 'DNA.synthesis/chromati<br>n structure'                                                       |
| 1054 | Star | 8 | 163958147 | 96.68361641 | 7  | 0.041224908  | 11592  | '27.3.27'       | grmzm2g092<br>759_t01 | 'RNA.regulation of<br>transcription.NAC<br>domain transcription<br>factor family'             |
| 1055 | Star | 8 | 164575505 | 99.62785513 | 54 | 0.021849064  | 16931  | '27.3.25'       | grmzm2g405<br>094_t01 | 'RNA.regulation of<br>transcription.MYB<br>domain transcription<br>factor family'             |
| 1056 | Star | 8 | 164575577 | 99.62807455 | 6  | 0.025622402  | 16859  | '27.3.25'       | grmzm2g405<br>094_t01 | 'RNA.regulation of<br>transcription.MYB<br>domain transcription<br>factor family'             |
| 1057 | Star | 8 | 170790378 | 123.8097673 | 5  | 0.018186972  | 138833 | '29.5.7'        | grmzm2g133<br>249_t01 | 'protein.degradation.met<br>alloprotease'                                                     |

|      |      |   |           |             |    |              |        |            |                       |                                                                                 |
|------|------|---|-----------|-------------|----|--------------|--------|------------|-----------------------|---------------------------------------------------------------------------------|
| 1058 | Star | 8 | 171107120 | 125.0290187 | 12 | 0.025903354  | 8056   | '17.4.1'   | grmzm2g024<br>476_t01 | 'hormone<br>metabolism.cytokinin.synthesis-degradation'                         |
| 1059 | Star | 8 | 171214220 | 125.4546422 | 15 | 0.023236917  | 20943  | '33.1'     | grmzm2g111<br>472_t01 | 'development.storage<br>proteins'                                               |
| 1060 | Star | 8 | 171235640 | 125.5397669 | 5  | 0.03304263   | 4349   | '26.2'     | grmzm2g111<br>428_t01 | 'misc.UDP glucosyl and<br>glucoronyl transferases'                              |
| 1061 | Star | 9 | 6999006   | 8.219780095 | 15 | -0.070552837 | 109664 | '27.2'     | grmzm2g017<br>537_t01 | 'RNA.transcription'                                                             |
| 1062 | Star | 9 | 7182819   | 8.716269429 | 27 | -0.043529797 | 56750  | '17.7.1.5' | grmzm2g000<br>236_t01 | 'hormone<br>metabolism.jasmonate.synthesis-degradation.12-Oxo-PDA-reductase'    |
| 1063 | Star | 9 | 7188622   | 8.731943661 | 42 | -0.041058477 | 50947  | '17.7.1.5' | grmzm2g000<br>236_t01 | 'hormone<br>metabolism.jasmonate.synthesis-degradation.12-Oxo-PDA-reductase'    |
| 1064 | Star | 9 | 8451164   | 12.14214118 | 5  | -0.047028655 | 149948 | '27.3.22'  | grmzm2g062<br>318_t01 | 'RNA.regulation of<br>transcription.HB,Homeobox transcription factor<br>family' |
| 1065 | Star | 9 | 134402439 | 70.88375129 | 15 | 0.037960828  | 80058  | '10.1.5'   | grmzm2g347<br>717_t01 | 'cell wall.precursor<br>synthesis.UXS'                                          |
| 1066 | Star | 9 | 134402663 | 70.88410046 | 6  | 0.036821304  | 79834  | '10.1.5'   | grmzm2g347<br>717_t01 | 'cell wall.precursor<br>synthesis.UXS'                                          |

|      |      |    |           |              |    |              |        |                   |                       |                                                                                                                                             |
|------|------|----|-----------|--------------|----|--------------|--------|-------------------|-----------------------|---------------------------------------------------------------------------------------------------------------------------------------------|
| 1067 | Star | 10 | 252732    | -5.658225645 | 12 | -0.051134421 | 130394 | '26.10'           | grmzm2g135<br>536_t01 | 'misc.cytochrome P450'                                                                                                                      |
| 1068 | Star | 10 | 5058530   | 14.79019912  | 16 | -0.06180889  | 56738  | '30.2.26'         | grmzm2g051<br>637_t01 | 'signalling.receptor<br>kinases.crinkly like'                                                                                               |
| 1069 | Star | 10 | 19566488  | 34.07832787  | 6  | 0.024937218  | 19288  | '30.4.5'          | grmzm2g006<br>206_t01 | 'signalling.phosphinositi<br>des.inositol-1,3,4-<br>trisphosphate 5/6-kinase'                                                               |
| 1070 | Star | 10 | 24052625  | 35.28519133  | 6  | -0.043928314 | 390904 | '21.1'            | grmzm2g141<br>848_t01 | 'redox.thioredoxin'<br><br>'amino acid<br>metabolism.synthesis.aro<br>matic<br>aa.chorismate.dehydroqu<br>inate/shikimate<br>dehydrogenase' |
| 1071 | Star | 10 | 25801766  | 35.75574637  | 8  | 0.085574049  | 163401 | '13.1.6.1<br>.10' | grmzm2g014<br>376_t01 | 'RNA.regulation of<br>transcription.ABI3/VP1-<br>related B3-domain-<br>containing transcription<br>factor family'                           |
| 1072 | Star | 10 | 66920393  | 36.73131562  | 29 | 0.080127465  | 212540 | '27.3.1'          | grmzm2g423<br>393_t01 | 'development.unspecifie<br>d'                                                                                                               |
| 1073 | Star | 10 | 89396968  | 41.46314855  | 33 | 0.05899755   | 15206  | '33.99'           | grmzm2g339<br>820_t01 | 'transport.potassium'                                                                                                                       |
| 1074 | Star | 10 | 128172908 | 51.27327366  | 11 | 0.06244423   | 30487  | '34.15'           | grmzm2g000<br>261_t01 | 'misc.gluco-, galacto-<br>and mannosidases'                                                                                                 |
| 1075 | Star | 10 | 129906986 | 52.44415722  | 5  | 0.052854061  | 20956  | '26.3'            | grmzm2g031<br>628_t01 |                                                                                                                                             |

|      |      |    |           |             |    |              |        |                   |                       |                                                                                          |
|------|------|----|-----------|-------------|----|--------------|--------|-------------------|-----------------------|------------------------------------------------------------------------------------------|
| 1076 | Star | 10 | 140767339 | 72.41844784 | 6  | -0.032991889 | 105575 | '10.7'            | grmzm2g142<br>857_t01 | 'cell wall.modification'                                                                 |
| 1077 | Star | 10 | 141976268 | 75.93807797 | 6  | -0.020261715 | 31348  | '15.2'            | grmzm2g354<br>855_t01 | 'metal handling.binding,<br>chelation and storage'                                       |
| 1078 | Star | 10 | 141976795 | 75.94005902 | 15 | -0.022617226 | 30821  | '15.2'            | grmzm2g354<br>855_t01 | 'metal handling.binding,<br>chelation and storage'                                       |
| 1079 | Star | 10 | 144909314 | 84.63476656 | 5  | -0.022505092 | 22430  | '31.3'            | grmzm2g546<br>369_t01 | 'cell.cycle'                                                                             |
| 1080 | Star | 10 | 145742058 | 87.95852999 | 6  | -0.025366805 | 105204 | '27.3.28'         | grmzm2g058<br>588_t01 | 'RNA.regulation of<br>transcription.SBP,Squam<br>osa promoter binding<br>protein family' |
| 1081 | Sucr | 1  | 21442536  | 37.78627202 | 7  | -0.039016626 | 3542   | '27.3.99'         | grmzm2g004<br>259_t01 | 'RNA.regulation of<br>transcription.unclassified<br>'                                    |
| 1082 | Sucr | 1  | 21449014  | 37.79227512 | 7  | -0.03673907  | 9475   | '29.5.11.<br>4.2' | grmzm2g004<br>422_t01 | 'protein.degradation.ubiq<br>uitin.E3.RING'<br>'hormone                                  |
| 1083 | Sucr | 1  | 21560442  | 37.97512826 | 47 | -0.038190551 | 31998  | '17.5.2'          | ac200038.4_f<br>gt011 | metabolism.ethylene.sig<br>nal transduction'                                             |
| 1084 | Sucr | 1  | 21688795  | 38.19316881 | 12 | -0.036506395 | 21240  | '26.24'           | grmzm2g114<br>184_t01 | 'misc.GCN5-related N-<br>acetyltransferase'                                              |
| 1085 | Sucr | 1  | 21689538  | 38.19443099 | 17 | -0.081014671 | 20497  | '26.24'           | grmzm2g114<br>184_t01 | 'misc.GCN5-related N-<br>acetyltransferase'                                              |



|      |      |   |           |             |    |              |        |                 |                       |                                                                                                 |
|------|------|---|-----------|-------------|----|--------------|--------|-----------------|-----------------------|-------------------------------------------------------------------------------------------------|
| 1086 | Sucr | 1 | 56544677  | 69.98493609 | 7  | 0.091004411  | 113019 | '19.7'          | grmzm2g044<br>074_t02 | 'tetrapyrrole<br>synthesis.uroporphyrinog<br>en decarboxylase'                                  |
| 1087 | Sucr | 1 | 69598189  | 76.61808194 | 8  | 0.06063527   | 17432  | '29.4.1.5<br>7' | grmzm2g142<br>390_t01 | 'protein.postranslational<br>modification.kinase.rece<br>ptor like cytoplasmatic<br>kinase VII' |
| 1088 | Sucr | 1 | 274645019 | 167.2992575 | 6  | 0.087168737  | 5834   | '29.4'          | grmzm2g131<br>629_t01 | 'protein.postranslational<br>modification'                                                      |
| 1089 | Sucr | 2 | 2076282   | 3.859030239 | 6  | -0.033975872 | 133215 | '30.2.11'       | grmzm2g452<br>142_t01 | 'signalling.receptor<br>kinases.leucine rich<br>repeat XI'                                      |
| 1090 | Sucr | 2 | 3086016   | 6.851945591 | 12 | -0.032332673 | 313    | '29.1.4'        | grmzm2g071<br>333_t01 | 'protein.aa<br>activation.leucine-tRNA<br>ligase'                                               |
| 1091 | Sucr | 2 | 16641157  | 44.04382336 | 15 | -0.073754786 | 10096  | '31.1'          | grmzm2g081<br>032_t01 | 'cell.organisation'                                                                             |
| 1092 | Sucr | 2 | 22494974  | 54.03923714 | 9  | -0.048242813 | 2409   | '30.2.99'       | grmzm2g062<br>471_t01 | 'signalling.receptor<br>kinases.misc'                                                           |
| 1093 | Sucr | 2 | 28592546  | 60.19229134 | 29 | -0.039020967 | 2135   | '27.3.67'       | grmzm2g052<br>688_t01 | 'RNA.regulation of<br>transcription.putative<br>transcription regulator'                        |
| 1094 | Sucr | 2 | 28594174  | 60.19401294 | 7  | -0.040826501 | 507    | '27.3.67'       | grmzm2g052<br>688_t01 | 'RNA.regulation of<br>transcription.putative<br>transcription regulator'                        |

|      |      |   |           |             |    |              |        |           |                       |                                                                                                |
|------|------|---|-----------|-------------|----|--------------|--------|-----------|-----------------------|------------------------------------------------------------------------------------------------|
| 1095 | Sucr | 2 | 28973324  | 60.59496034 | 16 | -0.039233491 | 86723  | '9.1.2'   | grmzm2g141<br>605_t01 | 'mitochondrial electron<br>transport / ATP<br>synthesis.NADH-<br>DH.localisation not<br>clear' |
| 1096 | Sucr | 3 | 13298136  | 40.11395447 | 19 | -0.042921756 | 248    | '34.19.2' | grmzm2g146<br>627_t01 | 'transport.Major Intrinsic<br>Proteins.TIP'                                                    |
| 1097 | Sucr | 3 | 16863398  | 44.72397195 | 35 | -0.053561956 | 4617   | '20.1'    | ac215260.3_f<br>gt001 | 'stress.biotic'                                                                                |
| 1098 | Sucr | 3 | 16863598  | 44.72423056 | 21 | -0.054013921 | 4417   | '20.1'    | ac215260.3_f<br>gt001 | 'stress.biotic'                                                                                |
| 1099 | Sucr | 3 | 20147626  | 48.97060192 | 5  | -0.037039448 | 8026   | '20.2.1'  | grmzm2g437<br>100_t01 | 'stress.abiotic.heat'                                                                          |
| 1100 | Sucr | 3 | 110202362 | 58.86475128 | 7  | 0.123753616  | 122264 | '20.2.4'  | grmzm2g028<br>665_t01 | 'stress.abiotic.touch/wou<br>nding'                                                            |
| 1101 | Sucr | 3 | 174587864 | 84.65461078 | 5  | 0.067483949  | 101677 | '27.3.26' | grmzm2g027<br>914_t01 | 'RNA.regulation of<br>transcription.MYB-<br>related transcription<br>factor family'            |
| 1102 | Sucr | 3 | 221390629 | 140.2263942 | 10 | -0.044839083 | 16918  | '34.3'    | grmzm2g476<br>954_t01 | 'transport.amino acids'                                                                        |
| 1103 | Sucr | 4 | 11976890  | 33.81581685 | 5  | 0.063333379  | 9289   | '27.4'    | grmzm2g010<br>056_t02 | 'RNA.RNA binding'                                                                              |
| 1104 | Sucr | 4 | 12389613  | 33.87001839 | 25 | 0.073578644  | 226873 | '27.1'    | grmzm2g030<br>463_t01 | 'RNA.processing'                                                                               |

|      |      |   |           |             |    |              |        |           |                       |                                                                                                         |
|------|------|---|-----------|-------------|----|--------------|--------|-----------|-----------------------|---------------------------------------------------------------------------------------------------------|
| 1105 | Sucr | 4 | 17655938  | 40.84317673 | 14 | 0.091223346  | 69362  | '26.8'    | grmzm2g173<br>105_t01 | 'misc.nitrilases, *nitrile lyases, berberine bridge enzymes, reticuline oxidases, troponine reductases' |
| 1106 | Sucr | 4 | 49286057  | 55.14879543 | 6  | -0.093785941 | 238546 | '27.3.67' | grmzm2g173<br>479_t01 | 'RNA.regulation of transcription.putative transcription regulator'                                      |
| 1107 | Sucr | 4 | 60649130  | 55.4149908  | 15 | -0.083392435 | 118072 | '31.3.1'  | grmzm2g049<br>525_t01 | 'cell.cycle.peptidylprolyl isomerase'                                                                   |
| 1108 | Sucr | 4 | 110959949 | 58.04594151 | 5  | -0.074747404 | 453213 | '11.3'    | ac217811.3_f<br>gt002 | 'lipid metabolism.Phospholipid synthesis'                                                               |
| 1109 | Sucr | 4 | 140704850 | 60.02921307 | 7  | -0.041801329 | 555464 | '29.4'    | grmzm2g162<br>637_t01 | 'protein.postranslational modification'                                                                 |
| 1110 | Sucr | 4 | 173809531 | 84.19454361 | 9  | -0.032604677 | 47484  | '29.4'    | grmzm2g135<br>073_t01 | 'protein.postranslational modification'                                                                 |
| 1111 | Sucr | 4 | 173813253 | 84.2005901  | 5  | -0.034242183 | 43762  | '29.4'    | grmzm2g135<br>073_t01 | 'protein.postranslational modification'                                                                 |
| 1112 | Sucr | 4 | 173813260 | 84.20060147 | 28 | -0.039007994 | 43755  | '29.4'    | grmzm2g135<br>073_t01 | 'protein.postranslational modification'                                                                 |

|      |      |   |           |             |    |              |                     |           |                       |                                                                          |
|------|------|---|-----------|-------------|----|--------------|---------------------|-----------|-----------------------|--------------------------------------------------------------------------|
| 1113 | Sucr | 4 | 175615429 | 86.62964208 | 5  | -0.045120538 | 118213              | '10.6.3'  | grmzm2g047<br>414_t01 | 'cell<br>wall.degradation.pectate<br>lyases and<br>polygalacturonases'   |
| 1114 | Sucr | 5 | 7403398   | 28.1227481  | 5  | 0.028118305  | 873                 | '27.3.63' | grmzm2g087<br>482_t01 | 'RNA.regulation of<br>transcription.PHD finger<br>transcription factor'  |
| 1115 | Sucr | 5 | 7568984   | 28.7329509  | 5  | 0.03044864   | 93287               | '14.1'    | grmzm2g051<br>270_t01 | 'S-assimilation.ATPS'                                                    |
| 1116 | Sucr | 5 | 52480298  | 61.27077539 | 9  | 0.075988657  | 30430               | '26.12'   | grmzm2g142<br>011_t02 | 'misc.peroxidases'                                                       |
| 1117 | Sucr | 5 | 68604010  | 65.0820323  | 8  | 0.067664981  | 3265                | '33.99'   | grmzm2g389<br>155_t01 | 'development.unspecifie<br>d'                                            |
| 1118 | Sucr | 5 | 68606903  | 65.08331839 | 14 | 0.085965605  | 372                 | '33.99'   | grmzm2g389<br>155_t01 | 'development.unspecifie<br>d'                                            |
| 1119 | Sucr | 5 | 73961139  | 66.43957914 | 7  | -0.05697045  | '29.5.11.<br>243055 | 4.2'      | grmzm2g072<br>142_t01 | 'protein.degradation.ubiq<br>uitin.E3.RING'                              |
| 1120 | Sucr | 5 | 76585969  | 67.18687192 | 15 | -0.06624114  | 287731              | '17.8.1'  | grmzm2g303<br>419_t01 | 'hormone<br>metabolism.salicylic<br>acid.synthesis-<br>degradation'      |
| 1121 | Sucr | 5 | 80096521  | 67.90868619 | 6  | -0.061436645 | 23270               | '27.3.67' | grmzm2g425<br>774_t01 | 'RNA.regulation of<br>transcription.putative<br>transcription regulator' |

|      |      |   |           |             |    |              |        |                |                       |                                                                                                                        |
|------|------|---|-----------|-------------|----|--------------|--------|----------------|-----------------------|------------------------------------------------------------------------------------------------------------------------|
| 1122 | Sucr | 5 | 173340061 | 84.83341391 | 9  | 0.040041361  | 107050 | '27.3.3'       | grmzm2g087<br>040_t01 | 'RNA.regulation of<br>transcription.AP2/EREB<br>P, APETALA2/Ethylene-<br>responsive element<br>binding protein family' |
| 1123 | Sucr | 5 | 184390409 | 93.70403371 | 8  | 0.03379498   | 6053   | '29.4'         | grmzm2g463<br>711_t01 | 'protein.postranslational<br>modification'                                                                             |
| 1124 | Sucr | 5 | 184579203 | 93.9214921  | 6  | 0.048528702  | 597    | '21.4'         | grmzm2g148<br>387_t01 | 'redox.glutaredoxins'                                                                                                  |
| 1125 | Sucr | 5 | 204093596 | 114.9003073 | 8  | 0.029700141  | 2446   | '29.5'         | grmzm2g090<br>981_t01 | 'protein.degradation'                                                                                                  |
| 1126 | Sucr | 5 | 204527912 | 116.1688529 | 7  | 0.036011734  | 70954  | '8.1.1.1'      | grmzm2g140<br>150_t01 | 'TCA / org.<br>transformation.TCA.pyr<br>uvate DH.E1'                                                                  |
| 1127 | Sucr | 6 | 120727054 | 44.61545648 | 5  | -0.053699952 | 159637 | '27.3.99'      | grmzm2g174<br>129_t01 | 'RNA.regulation of<br>transcription.unclassified<br>'                                                                  |
| 1128 | Sucr | 6 | 120956190 | 44.6914035  | 8  | -0.077855121 | 105351 | '23.1.2.9<br>' | grmzm2g164<br>665_t01 | 'nucleotide<br>metabolism.synthesis.pur<br>ine.AICAR<br>transformylase'                                                |
| 1129 | Sucr | 6 | 125454322 | 46.41917569 | 67 | -0.070562811 | 1745   | '30.3'         | grmzm2g152<br>040_t02 | 'signalling.calcium'                                                                                                   |
| 1130 | Sucr | 6 | 161584484 | 86.71512205 | 10 | -0.089408624 | 14608  | '31.1'         | grmzm2g445<br>423_t01 | 'cell.organisation'<br>'RNA.regulation of<br>transcription.bHLH,Basi<br>c Helix-Loop-Helix<br>family'                  |
| 1131 | Sucr | 6 | 161899740 | 87.96647854 | 58 | -0.077401595 | 65874  | '27.3.6'       | grmzm2g094<br>892_t01 | 'RNA.regulation of<br>transcription.AP2/EREB<br>P, APETALA2/Ethylene-<br>responsive element<br>binding protein family' |

|      |      |   |           |             |    |              |                  |                       |                                                                                                         |
|------|------|---|-----------|-------------|----|--------------|------------------|-----------------------|---------------------------------------------------------------------------------------------------------|
| 1132 | Sucr | 7 | 2586268   | 7.006474955 | 17 | -0.036400236 | 1170 '29.6'      | grmzm2g043<br>383_t01 | 'protein.folding'                                                                                       |
| 1133 | Sucr | 7 | 3570399   | 12.79412594 | 7  | -0.060608629 | 99940 '27.3.22'  | grmzm2g028<br>041_t01 | 'RNA.regulation of transcription.HB,Homeobox transcription factor family'                               |
| 1134 | Sucr | 7 | 107347438 | 54.26102457 | 17 | -0.042958657 | 108249 '27.3.80' | grmzm2g161<br>315_t01 | 'RNA.regulation of transcription.zf-HD'                                                                 |
| 1135 | Sucr | 7 | 107748384 | 54.46470141 | 23 | -0.048482794 | 9704 '34.2'      | grmzm2g029<br>153_t01 | 'transport.sugars'                                                                                      |
| 1136 | Sucr | 7 | 112739677 | 57.00023193 | 20 | -0.052798268 | 168812 '33.99'   | grmzm2g041<br>175_t01 | 'development.unspecific d'                                                                              |
| 1137 | Sucr | 7 | 117566293 | 59.45210806 | 8  | -0.045031015 | 529 '29.4'       | grmzm2g396<br>350_t01 | 'protein.postranslational modification'                                                                 |
| 1138 | Sucr | 7 | 140199828 | 78.55767933 | 6  | 0.050727731  | 137104 '26.7'    | grmzm2g041<br>394_t01 | 'misc.oxidases - copper, flavone etc.'                                                                  |
| 1139 | Sucr | 7 | 158146806 | 102.5659158 | 5  | -0.076514492 | 55878 '26.8'     | grmzm2g151<br>801_t01 | 'misc.nitrilases, *nitrile lyases, berberine bridge enzymes, reticuline oxidases, troponine reductases' |

|      |      |   |           |             |    |             |       |                    |                       |                                                                       |
|------|------|---|-----------|-------------|----|-------------|-------|--------------------|-----------------------|-----------------------------------------------------------------------|
| 1140 | Sucr | 7 | 169562400 | 134.5167655 | 17 | -0.03237163 | 38864 | '29.2.1.2<br>.1.4' | grmzm2g086<br>656_t01 | 'protein.synthesis.ribosomal<br>protein.eukaryotic.40S<br>subunit.S4' |
| 1141 | Sucr | 8 | 163333139 | 94.90114389 | 20 | 0.100296937 | 99019 | '29.5.5'           | grmzm2g172<br>829_t01 | 'protein.degradation.serine<br>protease'                              |
| 1142 | Sucr | 8 | 164331901 | 98.88225877 | 17 | 0.036391177 | 34241 | '29.5.11.<br>1'    | grmzm2g114<br>172_t01 | 'protein.degradation.ubiquitin.ubiquitin'                             |
| 1143 | Sucr | 8 | 164401313 | 99.09699982 | 5  | 0.085464891 | 15381 | '1.2.5'            | grmzm2g113<br>959_t01 | 'PS.photorespiration.serine<br>hydroxymethyltransferase'              |
| 1144 | Sucr | 8 | 164401324 | 99.09703335 | 20 | 0.065104941 | 15370 | '1.2.5'            | grmzm2g113<br>959_t01 | 'PS.photorespiration.serine<br>hydroxymethyltransferase'              |
| 1145 | Sucr | 8 | 164401576 | 99.09780132 | 7  | 0.074809194 | 15118 | '1.2.5'            | grmzm2g113<br>959_t01 | 'PS.photorespiration.serine<br>hydroxymethyltransferase'              |
| 1146 | Sucr | 8 | 168628318 | 113.9072651 | 19 | 0.03649192  | 81970 | '20.2.99'          | grmzm2g169<br>695_t01 | 'stress.abiotic.unspecific'                                           |

|      |       |    |           |             |    |              |        |           |                       |                                                                                                         |
|------|-------|----|-----------|-------------|----|--------------|--------|-----------|-----------------------|---------------------------------------------------------------------------------------------------------|
| 1147 | Sucr  | 8  | 172057184 | 128.8248994 | 5  | 0.045679833  | 8995   | '27.3.17' | grmzm2g104<br>246_t01 | 'RNA.regulation of transcription.CPP(Zn),C<br>PP1-related transcription factor family'                  |
| 1148 | Sucr  | 8  | 172057190 | 128.8249236 | 9  | 0.044703695  | 8989   | '27.3.17' | grmzm2g104<br>246_t01 | 'RNA.regulation of transcription.CPP(Zn),C<br>PP1-related transcription factor family'                  |
| 1149 | Sucr  | 10 | 2166827   | 0.955425267 | 15 | -0.093456643 | 9229   | '1.1.5.3' | grmzm2g320<br>305_t01 | 'PS.lightreaction.other electron carrier<br>(ox/red).ferredoxin reductase'                              |
| 1150 | Sucr  | 10 | 2698524   | 2.792564149 | 42 | -0.098765758 | 11584  | '30.11'   | grmzm2g058<br>531_t01 | 'signalling.light'                                                                                      |
| 1151 | Sucr  | 10 | 3240557   | 4.665416356 | 5  | -0.076233214 | 49388  | '20.1'    | grmzm2g349<br>565_t01 | 'stress.biotic'                                                                                         |
| 1152 | Sucr  | 10 | 77488297  | 38.59893808 | 5  | -0.053379979 | 386121 | '26.8'    | grmzm2g078<br>906_t01 | 'misc.nitrilases, *nitrile lyases, berberine bridge enzymes, reticuline oxidases, troponine reductases' |
| 1153 | Sucr  | 10 | 85544281  | 40.43156797 | 5  | -0.03474644  | 42084  | '26.12'   | grmzm2g006<br>727_t01 | 'misc.peroxidases'                                                                                      |
| 1154 | Sucr  | 10 | 113451096 | 45.40733399 | 7  | -0.04402236  | 57318  | '28.1'    | grmzm2g147<br>390_t01 | 'DNA.synthesis/chromatin structure'                                                                     |
| 1155 | Prin1 | 1  | 52690146  | 67.43745454 | 28 | -0.325669425 | 22847  | '26.21'   | grmzm2g174<br>680_t01 | 'misc.protease inhibitor/seed storage/lipid transfer protein (LTP) family protein'                      |



|      |       |   |           |             |    |              |        |           |                       |                                                                                                         |
|------|-------|---|-----------|-------------|----|--------------|--------|-----------|-----------------------|---------------------------------------------------------------------------------------------------------|
| 1156 | Prin1 | 1 | 86713369  | 83.51202829 | 6  | -0.361580066 | 39984  | '26.7'    | grmzm2g425<br>719_t01 | 'misc.oxidases - copper,<br>flavone etc.'                                                               |
| 1157 | Prin1 | 1 | 89352884  | 84.21946029 | 45 | -0.377779862 | 50645  | '30.3'    | grmzm2g107<br>575_t01 | 'signalling.calcium'                                                                                    |
| 1158 | Prin1 | 1 | 172752341 | 94.00861544 | 12 | 0.251503889  | 56380  | '27.1.2'  | grmzm2g107<br>984_t01 | 'RNA.processing.RNA<br>helicase'                                                                        |
| 1159 | Prin1 | 1 | 173107592 | 94.12366453 | 7  | 0.364562902  | 73759  | '27.3.14' | grmzm2g361<br>842_t01 | 'RNA.regulation of<br>transcription.CCAAT<br>box binding factor<br>family, HAP2'                        |
| 1160 | Prin1 | 1 | 206686287 | 118.8958806 | 6  | -0.243142768 | 113757 | '27.3.11' | grmzm2g042<br>407_t01 | 'RNA.regulation of<br>transcription.C2H2 zinc<br>finger family'                                         |
| 1161 | Prin1 | 1 | 212358693 | 123.8826126 | 13 | -0.187087297 | 24411  | '29.5'    | grmzm2g152<br>485_t01 | 'protein.degradation'                                                                                   |
| 1162 | Prin1 | 1 | 219369577 | 128.5769255 | 8  | -0.230027518 | 29974  | '27.3.69' | grmzm2g074<br>094_t02 | 'RNA.regulation of<br>transcription.SET-<br>domain transcriptional<br>regulator family'                 |
| 1163 | Prin1 | 1 | 221341695 | 129.3656668 | 18 | -0.363923496 | 184041 | '34.3'    | grmzm2g149<br>946_t01 | 'transport.amino acids'<br>'RNA.regulation of<br>transcription.ARF,<br>Auxin Response Factor<br>family' |
| 1164 | Prin1 | 2 | 2211542   | 4.46960072  | 7  | 0.173420062  | 42570  | '27.3.4'  | grmzm2g078<br>274_t01 | 'RNA.regulation of<br>transcription.ARF,<br>Auxin Response Factor<br>family'                            |
| 1165 | Prin1 | 2 | 2211569   | 4.4697226   | 21 | 0.190449042  | 42543  | '27.3.4'  | grmzm2g078<br>274_t01 | 'RNA.regulation of<br>transcription.ARF,<br>Auxin Response Factor<br>family'                            |

|      |       |   |           |             |    |             |        |           |                       |                                                                                  |
|------|-------|---|-----------|-------------|----|-------------|--------|-----------|-----------------------|----------------------------------------------------------------------------------|
| 1166 | Prin1 | 2 | 4299945   | 11.96658077 | 43 | 0.175516911 | 6262   | '34.1'    | grmzm2g019<br>404_t01 | 'transport.p- and v-<br>ATPases'                                                 |
| 1167 | Prin1 | 2 | 4870077   | 14.13414888 | 6  | 0.185328555 | 9259   | '34.6'    | grmzm2g395<br>114_t01 | 'transport.sulphate'                                                             |
| 1168 | Prin1 | 2 | 37249730  | 65.55400788 | 27 | 0.483745172 | 2987   | '33.99'   | grmzm2g063<br>163_t01 | 'development.unspecifie<br>d'                                                    |
| 1169 | Prin1 | 2 | 38625981  | 66.45985177 | 6  | 0.393707078 | 50517  | '17.5.1'  | grmzm2g121<br>700_t04 | 'hormone<br>metabolism.ethylene.synt<br>hesis-degradation'                       |
| 1170 | Prin1 | 2 | 39794143  | 67.22873216 | 23 | 0.5113885   | 91213  | '27.1'    | grmzm2g027<br>571_t01 | 'RNA.processing'                                                                 |
| 1171 | Prin1 | 2 | 39879711  | 67.28505273 | 9  | 0.434301435 | 5645   | '27.1'    | grmzm2g027<br>571_t01 | 'RNA.processing'<br>'RNA.regulation of<br>transcription.bZIP                     |
| 1172 | Prin1 | 2 | 185284281 | 95.94214858 | 24 | 0.238072478 | 169068 | '27.3.35' | grmzm2g137<br>532_t01 | transcription factor<br>family'                                                  |
| 1173 | Prin1 | 2 | 186269385 | 97.19232631 | 15 | 0.189950055 | 3715   | '27.3.16' | grmzm2g022<br>162_t01 | 'RNA.regulation of<br>transcription.CCAAT<br>box binding factor<br>family, HAP5' |
| 1174 | Prin1 | 2 | 186285785 | 97.21313925 | 13 | 0.19792386  | 1784   | '34.99'   | grmzm2g031<br>837_t01 | 'transport.misc'                                                                 |
| 1175 | Prin1 | 2 | 186766346 | 97.99944104 | 24 | 0.201406468 | 76022  | '27.3.57' | grmzm2g052<br>908_t01 | 'RNA.regulation of<br>transcription.JUMONJI<br>family'                           |

|      |       |   |           |             |    |              |        |                   |                       |                                                                                                |
|------|-------|---|-----------|-------------|----|--------------|--------|-------------------|-----------------------|------------------------------------------------------------------------------------------------|
| 1176 | Prin1 | 2 | 187583042 | 99.21938644 | 6  | 0.193767621  | 147197 | '27.3.59'         | grmzm2g025<br>095_t01 | 'RNA.regulation of<br>transcription.Methyl<br>binding domain proteins'                         |
| 1177 | Prin1 | 2 | 208604410 | 118.3005988 | 5  | -0.291990669 | 585    | '29.5.11.<br>4.2' | grmzm2g358<br>987_t01 | 'protein.degradation.ubiq<br>uitin.E3.RING'                                                    |
| 1178 | Prin1 | 3 | 6560146   | 25.42100729 | 9  | 0.224131566  | 37842  | '4.3.4'           | grmzm2g132<br>069_t01 | 'glycolysis.unclear/dually<br>targeted.phosphofructoki<br>nase (PFK)'                          |
| 1179 | Prin1 | 3 | 10019848  | 34.54290833 | 6  | 0.147532068  | 44682  | '34.16'           | grmzm2g118<br>243_t01 | 'transport.ABC<br>transporters and<br>multidrug resistance<br>systems'                         |
| 1180 | Prin1 | 3 | 10798853  | 36.10351096 | 5  | 0.15355804   | 198338 | '26.10'           | grmzm2g138<br>750_t01 | 'misc.cytochrome P450'                                                                         |
| 1181 | Prin1 | 3 | 173210277 | 83.47025878 | 7  | 0.372725567  | 461797 | '31.4'            | grmzm2g439<br>532_t01 | 'cell.vesicle transport'                                                                       |
| 1182 | Prin1 | 3 | 176397560 | 87.31080195 | 31 | 0.329494913  | 30122  | '11.3'            | grmzm2g083<br>195_t01 | 'lipid<br>metabolism.Phospholipi<br>d synthesis'                                               |
| 1183 | Prin1 | 3 | 177498347 | 88.92648807 | 6  | -0.320067184 | 161011 | '26.21'           | grmzm2g065<br>557_t01 | 'misc.protease<br>inhibitor/seed<br>storage/lipid transfer<br>protein (LTP) family<br>protein' |
| 1184 | Prin1 | 3 | 187651158 | 98.71945033 | 7  | -0.295211159 | 66284  | '10.6.3'          | ac233851.1_f<br>gt011 | 'cell<br>wall.degradation.pectate<br>lyases and<br>polygalacturonases'                         |

|      |       |   |           |             |    |              |                |                       |                                                                           |
|------|-------|---|-----------|-------------|----|--------------|----------------|-----------------------|---------------------------------------------------------------------------|
| 1185 | Prin1 | 3 | 208541649 | 118.8197976 | 8  | -0.369019896 | 664 '27.3.22'  | grmzm2g002<br>548_t01 | 'RNA.regulation of transcription.HB,Homeobox transcription factor family' |
| 1186 | Prin1 | 3 | 212248108 | 123.3033736 | 10 | -0.263177037 | 11 '26.28'     | grmzm2g047<br>129_t02 | 'misc.GDSL-motif lipase'                                                  |
| 1187 | Prin1 | 3 | 212248700 | 123.3041123 | 16 | -0.250746746 | 94418 '6.3'    | grmzm2g466<br>833_t01 | 'gluconeogenesis.Malate DH'                                               |
| 1188 | Prin1 | 3 | 213848298 | 126.6560335 | 53 | -0.249180593 | 5541 '1.5.1'   | grmzm2g348<br>512_t03 | 'PS.carbon concentrating mechanism.C4'                                    |
| 1189 | Prin1 | 3 | 213859916 | 126.6845705 | 6  | -0.219255555 | 28983 '1.5.1'  | grmzm2g121<br>878_t01 | 'PS.carbon concentrating mechanism.C4'                                    |
| 1190 | Prin1 | 4 | 31722606  | 50.95098413 | 20 | 0.217083693  | 280734 '31.1'  | ac203909.3_f<br>gt006 | 'cell.organisation'                                                       |
| 1191 | Prin1 | 4 | 90652356  | 57.4372722  | 43 | 0.176560253  | 164194 '6.3'   | grmzm2g068<br>455_t01 | 'gluconeogenesis.Malate DH'                                               |
| 1192 | Prin1 | 4 | 176411838 | 87.58887022 | 6  | -0.223703747 | 2298 '27.3.11' | grmzm2g121<br>151_t01 | 'RNA.regulation of transcription.C2H2 zinc finger family'                 |

|      |       |   |           |             |    |              |        |           |                       |                                                                                                                         |
|------|-------|---|-----------|-------------|----|--------------|--------|-----------|-----------------------|-------------------------------------------------------------------------------------------------------------------------|
| 1193 | Prin1 | 4 | 176745377 | 87.99059847 | 6  | -0.231675713 | 378672 | '20.1'    | grmzm2g158<br>811_t01 | 'stress.biotic'                                                                                                         |
| 1194 | Prin1 | 4 | 177057759 | 88.36684435 | 37 | -0.199910793 | 66290  | '20.1'    | grmzm2g158<br>811_t01 | 'stress.biotic'                                                                                                         |
| 1195 | Prin1 | 4 | 177225650 | 88.56905925 | 19 | -0.22500953  | 90065  | '27.3.67' | grmzm2g475<br>583_t01 | 'RNA.regulation of<br>transcription.putative<br>transcription regulator'                                                |
| 1196 | Prin1 | 4 | 177456322 | 88.84689021 | 5  | -0.177386326 | 2470   | '27.3.3'  | grmzm2g011<br>110_t01 | 'RNA.regulation of<br>transcription.AP2/EREB<br>P, APETALA2/Ethylene-<br>responsive element<br>binding protein family'  |
| 1197 | Prin1 | 4 | 243324592 | 133.223033  | 6  | 0.286380697  | 51080  | '16.1.5'  | grmzm2g065<br>494_t01 | 'secondary<br>metabolism.isoprenoids.t<br>erpenoids'                                                                    |
| 1198 | Prin1 | 5 | 1875087   | 2.828866055 | 9  | 0.198422919  | 7754   | '28.1'    | grmzm2g398<br>668_t01 | 'DNA.synthesis/chromati<br>n structure'                                                                                 |
| 1199 | Prin1 | 5 | 16786267  | 47.56865354 | 11 | 0.186128131  | 159981 | '29.2.3'  | grmzm2g018<br>943_t01 | 'protein.synthesis.initiati<br>on'                                                                                      |
| 1200 | Prin1 | 5 | 18656090  | 49.4044948  | 5  | 0.231641756  | 9698   | '10.5.5'  | grmzm2g087<br>326_t01 | 'cell wall.cell wall<br>proteins.RGP'<br>'RNA.regulation of<br>transcription.bHLH,Basi<br>c Helix-Loop-Helix<br>family' |
| 1201 | Prin1 | 5 | 19607267  | 50.33047385 | 6  | 0.191852193  | 173070 | '27.3.6'  | grmzm2g001<br>724_t03 | 'RNA.regulation of<br>transcription.putative<br>transcription regulator'                                                |

|      |       |   |           |             |    |              |                 |                       |                                                    |
|------|-------|---|-----------|-------------|----|--------------|-----------------|-----------------------|----------------------------------------------------|
| 1202 | Prin1 | 5 | 22228974  | 52.4036044  | 6  | 0.200210132  | 272 '30.2.99'   | grmzm2g166<br>719_t01 | 'signalling.receptor<br>kinases.misc'              |
| 1203 | Prin1 | 5 | 22628739  | 52.93108894 | 19 | 0.179737138  | 433 '29.5.5'    | grmzm2g082<br>502_t01 | 'protein.degradation.seri<br>ne protease'          |
| 1204 | Prin1 | 5 | 23032929  | 53.4644122  | 13 | 0.192543992  | 96191 '31.1'    | grmzm2g026<br>800_t01 | 'cell.organisation'                                |
| 1205 | Prin1 | 5 | 26723660  | 54.83773092 | 5  | 0.181309457  | 111423 '16.8.2' | grmzm2g477<br>683_t01 | 'secondary<br>metabolism.flavonoids.c<br>halcones' |
| 1206 | Prin1 | 5 | 27926098  | 55.29207074 | 8  | 0.259427803  | 20280 '34'      | grmzm2g462<br>081_t01 | 'transport'                                        |
| 1207 | Prin1 | 5 | 205662825 | 119.8501543 | 5  | -0.331878313 | 95037 '10.7'    | grmzm2g105<br>844_t01 | 'cell wall.modification'                           |
| 1208 | Prin1 | 5 | 205892823 | 120.5961956 | 20 | -0.202211883 | 1810 '33.99'    | grmzm2g100<br>593_t01 | 'development.unspecifie<br>d'                      |
| 1209 | Prin1 | 5 | 206470516 | 122.4700502 | 8  | -0.182601165 | 139927 '21.4'   | grmzm2g118<br>366_t01 | 'redox.glutaredoxins'                              |
| 1210 | Prin1 | 5 | 207093116 | 124.0642086 | 6  | -0.223961036 | 8111 '3.2.2'    | grmzm2g055<br>150_t01 | 'minor CHO<br>metabolism.trehalose.TP<br>P'        |

|            |   |           |              |    |              |                  |                       |                                                                                                  |
|------------|---|-----------|--------------|----|--------------|------------------|-----------------------|--------------------------------------------------------------------------------------------------|
| 1211 Prin1 | 5 | 207103724 | 124.0880847  | 6  | -0.211548066 | 3583 '26.2'      | grmzm2g055<br>124_t01 | 'misc.UDP glucosyl and<br>glucuronyl transferases'                                               |
| 1212 Prin1 | 5 | 207325275 | 124.5867434  | 7  | -0.207443465 | 11730 '34.15'    | grmzm2g375<br>116_t01 | 'transport.potassium'                                                                            |
| 1213 Prin1 | 6 | 2898813   | -7.559855335 | 7  | -0.16547695  | 2045 '11.9.3'    | grmzm2g023<br>335_t01 | 'lipid metabolism.lipid<br>degradation.lysophospho<br>lipases'                                   |
| 1214 Prin1 | 6 | 5873783   | -4.184534568 | 14 | -0.194407963 | 145507 '27.3.50' | grmzm2g019<br>257_t01 | 'RNA.regulation of<br>transcription.General<br>Transcription'                                    |
| 1215 Prin1 | 6 | 6894842   | -3.026068551 | 14 | -0.172667028 | 7826 '4.1.8'     | grmzm2g180<br>625_t01 | 'glycolysis.cytosolic<br>branch.glyceraldehyde 3-<br>phosphate<br>dehydrogenase (GAP-<br>DH)'    |
| 1216 Prin1 | 6 | 8419109   | -1.296676302 | 10 | -0.156917082 | 280289 '27.3.99' | grmzm2g060<br>057_t01 | 'RNA.regulation of<br>transcription.unclassified<br>'                                            |
| 1217 Prin1 | 6 | 14792950  | 5.295348837  | 11 | -0.186212199 | 368729 '27.3.30' | grmzm2g016<br>637_t01 | 'RNA.regulation of<br>transcription.Trihelix,<br>Triple-Helix<br>transcription factor<br>family' |
| 1218 Prin1 | 7 | 124476542 | 64.75250337  | 10 | 0.249817163  | 1292 '17.2.3'    | grmzm2g089<br>854_t01 | 'hormone<br>metabolism.auxin.induce<br>d-regulated-responsive-<br>activated'                     |
| 1219 Prin1 | 7 | 153457755 | 93.06309404  | 13 | 0.245403     | 321100 '27.3.10' | grmzm2g046<br>829_t01 | 'RNA.regulation of<br>transcription.C2C2(Zn)<br>YABBY family'                                    |
| 1220 Prin1 | 7 | 156111925 | 98.3472492   | 7  | 0.241907825  | 52249 '34.1'     | grmzm2g479<br>163_t01 | 'transport.p- and v-<br>ATPases'                                                                 |

|      |       |   |           |             |    |              |        |          |                                 |                                                                                                                                 |
|------|-------|---|-----------|-------------|----|--------------|--------|----------|---------------------------------|---------------------------------------------------------------------------------------------------------------------------------|
| 1221 | Prin1 | 7 | 156185170 | 98.49909898 | 33 | 0.211508581  | 16515  | '34.1'   | grmzm2g411<br>916_t01           | 'transport.p- and v-ATPases'                                                                                                    |
| 1222 | Prin1 | 7 | 159147927 | 104.6414159 | 9  | 0.180017249  | 128734 | .1.3'    | '29.2.1.2 grmzm2g093<br>902_t04 | 'protein.synthesis.ribosomal<br>protein.eukaryotic.40S subunit.S3'                                                              |
| 1223 | Prin1 | 7 | 159471791 | 105.3360113 | 5  | 0.203425704  | 86267  | .2.527'  | '29.2.1.2 grmzm2g030<br>731_t01 | 'protein.synthesis.ribosomal<br>protein.eukaryotic.60S subunit.L27A'                                                            |
| 1224 | Prin1 | 7 | 159471845 | 105.3361463 | 9  | 0.171827824  | 86213  | .2.527'  | '29.2.1.2 grmzm2g030<br>731_t01 | 'protein.synthesis.ribosomal<br>protein.eukaryotic.60S subunit.L27A'                                                            |
| 1225 | Prin1 | 7 | 160106822 | 106.9228459 | 9  | 0.206135369  | 17498  | '27.3.3' | grmzm2g060<br>876_t01           | 'RNA.regulation of transcription.AP2/EREBP, APETALA2/Ethylene-responsive element binding protein family'                        |
| 1226 | Prin1 | 7 | 169415919 | 134.4048149 | 10 | -0.207507404 | 55     | 4.2'     | '29.5.11. grmzm2g440<br>866_t01 | 'protein.degradation.ubiquitin.E3.RING'                                                                                         |
| 1227 | Prin1 | 8 | 2087948   | 4.782267599 | 7  | 0.209648655  | 8185   | '        | '13.1.7.2 grmzm2g082<br>214_t01 | 'amino acid metabolism.synthesis.histidine.bifunctional phosphoribosyl-ATP diphosphatase and phosphoribosyl-AMP cyclohydrolase' |
| 1228 | Prin1 | 8 | 4386420   | 11.24086841 | 11 | 0.365945724  | 16856  | '10.5.4' | grmzm2g006<br>734_t01           | 'cell wall.cell wall proteins.HRGP'                                                                                             |
| 1229 | Prin1 | 8 | 5283586   | 15.55733838 | 38 | 0.216233202  | 157660 | '3.2.3'  | grmzm2g416<br>836_t01           | 'minor CHO metabolism.trehalose.potential TPS/TPP'                                                                              |



|            |   |           |             |    |             |                 |                                                                                                       |
|------------|---|-----------|-------------|----|-------------|-----------------|-------------------------------------------------------------------------------------------------------|
| 1230 Prin1 | 8 | 8255624   | 20.95732171 | 5  | 0.182206933 | 163320 '26.3'   | ac234160.1_f 'misc.gluco-, galacto-<br>gt003 and mannosidases'                                        |
| 1231 Prin1 | 8 | 8403455   | 21.19881565 | 12 | 0.37507853  | 15489 '26.3'    | ac234160.1_f 'misc.gluco-, galacto-<br>gt003 and mannosidases'                                        |
| 1232 Prin1 | 8 | 103054530 | 58.74182186 | 7  | 0.277385271 | 99819 '20.1'    | grmzm2g017<br>603_t01 'stress.biotic'                                                                 |
| 1233 Prin1 | 8 | 105711842 | 59.67074769 | 21 | 0.237102288 | 2318 '1.5.1'    | grmzm2g097 'PS.carbon concentrating<br>457_t03 mechanism.C4'                                          |
| 1234 Prin1 | 8 | 108389110 | 60.44924097 | 8  | 0.215129664 | 223750 '34.99'  | grmzm2g312<br>198_t01 'transport.misc'                                                                |
| 1235 Prin1 | 8 | 108849125 | 60.58213104 | 19 | 0.325050069 | 31652 '27.3.32' | grmzm2g449 'RNA.regulation of<br>681_t01 transcription.WRKY<br>domain transcription<br>factor family' |
| 1236 Prin1 | 8 | 111264320 | 61.27983748 | 5  | 0.202557625 | 1266 '30.2.25'  | grmzm2g061 'signalling.receptor<br>718_t01 kinases.wall associated<br>kinase'                         |
| 1237 Prin1 | 8 | 117142297 | 63.44621372 | 6  | 0.231321611 | 54716 '20.2.3'  | ac204277.3_f 'stress.abiotic.drought/sal<br>gt006 t'                                                  |

|      |       |   |           |             |    |              |                       |                       |                                                                                                |
|------|-------|---|-----------|-------------|----|--------------|-----------------------|-----------------------|------------------------------------------------------------------------------------------------|
| 1238 | Prin1 | 8 | 117976115 | 63.86193872 | 6  | 0.224320933  | 180 '26.7'            | grmzm2g142<br>584_t01 | 'misc.oxidases - copper,<br>flavone etc.'                                                      |
| 1239 | Prin1 | 8 | 158510179 | 86.58550567 | 14 | -0.190411215 | 81429 '11.3'          | grmzm2g002<br>135_t01 | 'lipid<br>metabolism.Phospholipi<br>d synthesis'                                               |
| 1240 | Prin1 | 8 | 158697511 | 86.89047423 | 5  | -0.249857512 | 109822 '27.3.4'       | grmzm2g116<br>557_t01 | 'RNA.regulation of<br>transcription.ARF,<br>Auxin Response Factor<br>family'                   |
| 1241 | Prin1 | 8 | 159893599 | 88.49652739 | 21 | -0.181876531 | 198 '27.3.99'         | grmzm2g461<br>793_t01 | 'RNA.regulation of<br>transcription.unclassified<br>'                                          |
| 1242 | Prin1 | 8 | 159898572 | 88.50016935 | 13 | -0.17950465  | 194146 '17.4.2'       | grmzm2g423<br>456_t01 | 'hormone<br>metabolism.cytokinin.sig<br>nal transduction'                                      |
| 1243 | Prin1 | 8 | 162773842 | 93.15571435 | 5  | -0.176464664 | 14871 '28.1'          | grmzm2g421<br>829_t01 | 'DNA.synthesis/chromati<br>n structure'                                                        |
| 1244 | Prin1 | 9 | 12785133  | 22.10483847 | 6  | -0.158858265 | 14297 '30.11'         | grmzm2g067<br>053_t01 | 'signalling.light'                                                                             |
| 1245 | Prin1 | 9 | 20668779  | 36.70158796 | 15 | -0.209803433 | '29.4.1.5<br>72423 9' | grmzm2g433<br>433_t01 | 'protein.postranslational<br>modification.kinase.rece<br>ptor like cytoplasmatic<br>kinase IX' |
| 1246 | Prin1 | 9 | 20780641  | 36.88056228 | 5  | -0.183329952 | 4999 '27.3.22'        | grmzm2g106<br>276_t01 | 'RNA.regulation of<br>transcription.HB,Homeo<br>box transcription factor<br>family'            |

|      |       |    |           |             |    |              |        |                   |                       |                                                                                                  |
|------|-------|----|-----------|-------------|----|--------------|--------|-------------------|-----------------------|--------------------------------------------------------------------------------------------------|
| 1247 | Prin1 | 9  | 21433294  | 37.9247786  | 11 | -0.168662562 | 84952  | '26.14'           | grmzm2g114<br>098_t01 | 'misc.oxygenases'                                                                                |
| 1248 | Prin1 | 9  | 26434264  | 43.26084016 | 8  | -0.174249746 | 63090  | '20.2.1'          | grmzm2g152<br>373_t01 | 'stress.abiotic.heat'                                                                            |
| 1249 | Prin1 | 9  | 34855540  | 44.99799089 | 6  | -0.212168913 | 33435  | '34.3'            | grmzm2g150<br>406_t01 | 'transport.amino acids'                                                                          |
| 1250 | Prin1 | 9  | 113108447 | 55.8821261  | 7  | -0.307295112 | 68610  | '10.7'            | grmzm2g094<br>990_t01 | 'cell wall.modification'                                                                         |
| 1251 | Prin1 | 9  | 144471186 | 92.93120956 | 15 | -0.279214676 | 1648   | '34.6'            | grmzm2g342<br>907_t01 | 'transport.sulphate'                                                                             |
| 1252 | Prin1 | 9  | 144622187 | 93.27205089 | 19 | -0.236362959 | 100601 | '33.99'           | grmzm2g028<br>039_t02 | 'development.unspecifie<br>d'                                                                    |
| 1253 | Prin1 | 9  | 146785494 | 99.6308883  | 11 | -0.180210179 | 533    | '27.3.6'          | ac149829.2_f<br>gt004 | 'RNA.regulation of<br>transcription.bHLH,Basi<br>c Helix-Loop-Helix<br>family'                   |
| 1254 | Prin1 | 10 | 3622484   | 6.02423381  | 5  | 0.18783093   | 1653   | '29.5.11.<br>4.2' | grmzm2g467<br>576_t01 | 'protein.degradation.ubiq<br>uitin.E3.RING'                                                      |
| 1255 | Prin1 | 10 | 119575302 | 47.38384118 | 12 | -0.204463112 | 80771  | '27.3.30'         | grmzm2g392<br>168_t01 | 'RNA.regulation of<br>transcription.Trihelix,<br>Triple-Helix<br>transcription factor<br>family' |

|      |       |    |           |             |    |              |                 |                       |                                                                                      |
|------|-------|----|-----------|-------------|----|--------------|-----------------|-----------------------|--------------------------------------------------------------------------------------|
| 1256 | Prin1 | 10 | 137172137 | 64.52401076 | 13 | 0.291125843  | 98040 '34.14'   | grmzm2g455<br>171_t01 | 'transport.unspecified cations'                                                      |
| 1257 | Prin1 | 10 | 140585346 | 71.90932116 | 6  | 0.416795748  | 76614 '27.3.30' | grmzm2g415<br>229_t01 | 'RNA.regulation of transcription.Trihelix, Triple-Helix transcription factor family' |
| 1258 | Prin2 | 1  | 16528334  | 33.09583561 | 9  | -0.148363759 | 16588 '28.1'    | grmzm2g017<br>254_t01 | 'DNA.synthesis/chromatin structure'                                                  |
| 1259 | Prin2 | 1  | 16774678  | 33.28332749 | 16 | -0.148531763 | 181102 '26.7'   | grmzm2g000<br>427_t01 | 'misc.oxidases - copper, flavone etc.'                                               |
| 1260 | Prin2 | 1  | 17321663  | 33.69438463 | 6  | -0.167753428 | 21476 '29.2.3'  | grmzm2g115<br>182_t01 | 'protein.synthesis.initiation'                                                       |
| 1261 | Prin2 | 1  | 21383024  | 37.73112289 | 14 | -0.220900957 | 63054 '27.3.99' | grmzm2g004<br>259_t01 | 'RNA.regulation of transcription.unclassified'                                       |
| 1262 | Prin2 | 1  | 21688795  | 38.19316881 | 19 | -0.158781748 | 21240 '26.24'   | grmzm2g114<br>184_t01 | 'misc.GCN5-related N-acetyltransferase'                                              |
| 1263 | Prin2 | 1  | 21725760  | 38.25596337 | 8  | -0.160463885 | 29740 '30.11'   | grmzm2g114<br>055_t01 | 'signalling.light'                                                                   |
| 1264 | Prin2 | 1  | 46712396  | 62.60179969 | 12 | 0.205604085  | 40891 '27.1.1'  | grmzm2g153<br>450_t01 | 'RNA.processing.splicing'                                                            |

|      |       |   |           |             |    |              |                       |                       |                                                                                   |
|------|-------|---|-----------|-------------|----|--------------|-----------------------|-----------------------|-----------------------------------------------------------------------------------|
| 1265 | Prin2 | 1 | 46752724  | 62.62839403 | 29 | 0.217392494  | 563 '27.1.1'          | grmzm2g153<br>450_t01 | 'RNA.processing.splicin<br>g'                                                     |
| 1266 | Prin2 | 1 | 48772229  | 63.96015846 | 7  | 0.183706966  | 36480 '11.1.8'        | grmzm2g013<br>783_t01 | 'lipid metabolism.FA<br>synthesis and FA<br>elongation.acyl coa<br>ligase'        |
| 1267 | Prin2 | 1 | 51413724  | 65.71798167 | 16 | 0.162964157  | '2.2.1.3.<br>20752 1' | grmzm2g084<br>940_t01 | 'major CHO<br>metabolism.degradation.<br>sucrose.invertases.neutra<br>l'          |
| 1268 | Prin2 | 1 | 51506627  | 65.97678122 | 7  | 0.17642016   | 6810 '27.3.25'        | grmzm2g070<br>849_t01 | 'RNA.regulation of<br>transcription.MYB<br>domain transcription<br>factor family' |
| 1269 | Prin2 | 1 | 92753447  | 85.57176721 | 27 | 0.151936909  | 459526 '29.5.7'       | grmzm2g317<br>386_t01 | 'protein.degradation.met<br>alloprotease'                                         |
| 1270 | Prin2 | 1 | 228544370 | 135.6950109 | 18 | -0.296287834 | 332255 '27.3.99'      | grmzm2g014<br>676_t01 | 'RNA.regulation of<br>transcription.unclassified<br>'                             |
| 1271 | Prin2 | 1 | 229356638 | 136.3156268 | 6  | -0.360908732 | 161565 '27.3.50'      | grmzm2g131<br>577_t01 | 'RNA.regulation of<br>transcription.General<br>Transcription'                     |
| 1272 | Prin2 | 1 | 241747994 | 142.5070084 | 6  | -0.352944427 | 100384 '10.2'         | grmzm2g115<br>772_t01 | 'cell wall.cellulose<br>synthesis'                                                |
| 1273 | Prin2 | 1 | 244977165 | 144.1767876 | 5  | -0.366739502 | 158902 '27.3.25'      | ac217264.3_f<br>gt005 | 'RNA.regulation of<br>transcription.MYB<br>domain transcription<br>factor family' |

|      |       |   |           |             |    |              |        |                   |                       |                                                                                                                        |
|------|-------|---|-----------|-------------|----|--------------|--------|-------------------|-----------------------|------------------------------------------------------------------------------------------------------------------------|
| 1274 | Prin2 | 1 | 245007633 | 144.1925424 | 9  | -0.295276804 | 128434 | '27.3.25'         | ac217264.3_f<br>gt005 | 'RNA.regulation of<br>transcription.MYB<br>domain transcription<br>factor family'                                      |
| 1275 | Prin2 | 1 | 252877501 | 149.8251302 | 6  | -0.308540541 | 116893 | '28.1'            | grmzm2g099<br>023_t01 | 'DNA.synthesis/chromati<br>n structure'                                                                                |
| 1276 | Prin2 | 1 | 253031255 | 149.9489621 | 5  | -0.279689196 | 126804 | '33.99'           | grmzm2g031<br>120_t01 | 'development.unspecifie<br>d'                                                                                          |
| 1277 | Prin2 | 1 | 253328929 | 150.1887057 | 6  | -0.305359506 | 120443 | '27.3.41'         | grmzm2g098<br>063_t01 | 'RNA.regulation of<br>transcription.B3<br>transcription factor<br>family'                                              |
| 1278 | Prin2 | 2 | 4879221   | 14.16891319 | 10 | -0.178554558 | 115    | '34.6'            | grmzm2g395<br>114_t01 | 'transport.sulphate'                                                                                                   |
| 1279 | Prin2 | 2 | 5548572   | 16.71369911 | 43 | -0.154491728 | 15832  | '27.3.3'          | grmzm2g174<br>917_t01 | 'RNA.regulation of<br>transcription.AP2/EREB<br>P, APETALA2/Ethylene-<br>responsive element<br>binding protein family' |
| 1280 | Prin2 | 2 | 5682220   | 17.22181151 | 5  | -0.156996321 | 82350  | '29.5.11.<br>4.2' | grmzm2g066<br>169_t01 | 'protein.degradation.ubiq<br>uitin.E3.RING'                                                                            |
| 1281 | Prin2 | 2 | 26641159  | 57.94684499 | 18 | -0.149499019 | 6232   | '17.1.3'          | grmzm2g114<br>153_t01 | 'hormone<br>metabolism.abscisic<br>acid.induced-regulated-<br>responsive-activated'                                    |
| 1282 | Prin2 | 2 | 27916738  | 59.06362357 | 30 | -0.172361155 | 8595   | '13.2.3.5<br>'    | grmzm2g471<br>931_t01 | 'amino acid<br>metabolism.degradation.<br>aspartate family.lysine'                                                     |

|      |       |   |           |             |    |              |        |                 |                       |                                                                                                 |
|------|-------|---|-----------|-------------|----|--------------|--------|-----------------|-----------------------|-------------------------------------------------------------------------------------------------|
| 1283 | Prin2 | 2 | 28972476  | 60.59406358 | 25 | -0.235153714 | 87571  | '9.1.2'         | grmzm2g141<br>605_t01 | 'mitochondrial electron<br>transport / ATP<br>synthesis.NADH-<br>DH.localisation not<br>clear'  |
| 1284 | Prin2 | 2 | 34001062  | 63.56397414 | 13 | -0.186467942 | 1995   | '20.1'          | grmzm2g052<br>175_t01 | 'stress.biotic'                                                                                 |
| 1285 | Prin2 | 2 | 34937097  | 64.04660572 | 9  | 0.335345874  | 74139  | '29.4.1.5<br>7' | grmzm2g051<br>984_t01 | 'protein.postranslational<br>modification.kinase.rece<br>ptor like cytoplasmatic<br>kinase VII' |
| 1286 | Prin2 | 2 | 81996078  | 75.87752354 | 6  | -0.253830438 | 142550 | '13.2.3.2<br>'  | grmzm2g125<br>310_t01 | 'amino acid<br>metabolism.degradation.<br>aspartate<br>family.threonine'                        |
| 1287 | Prin2 | 2 | 124738310 | 77.33837071 | 9  | -0.276512367 | 321557 | '30.2.99'       | grmzm2g301<br>355_t01 | 'signalling.receptor<br>kinases.misc'                                                           |
| 1288 | Prin2 | 2 | 124769416 | 77.34049122 | 25 | -0.297074114 | 290451 | '30.2.99'       | grmzm2g301<br>355_t01 | 'signalling.receptor<br>kinases.misc'                                                           |
| 1289 | Prin2 | 3 | 2915029   | 8.667233227 | 5  | -0.195341132 | 3441   | '33.99'         | grmzm2g060<br>974_t01 | 'development.unspecifie<br>d'                                                                   |
| 1290 | Prin2 | 3 | 3185414   | 10.0663659  | 10 | -0.231447784 | 4509   | '17.2.2'        | grmzm2g001<br>566_t01 | 'hormone<br>metabolism.auxin.signal<br>transduction'                                            |

|      |       |   |          |             |    |              |        |           |                       |                                                                              |
|------|-------|---|----------|-------------|----|--------------|--------|-----------|-----------------------|------------------------------------------------------------------------------|
| 1291 | Prin2 | 3 | 3386685  | 11.10786166 | 18 | -0.158579918 | 16649  | '27.3.52' | grmzm2g400<br>907_t02 | 'RNA.regulation of<br>transcription.Global<br>transcription factor<br>group' |
| 1292 | Prin2 | 3 | 10750451 | 36.00654587 | 9  | -0.164241331 | 3268   | '34.18'   | grmzm2g051<br>753_t02 | 'transport.unspecified<br>anions'                                            |
| 1293 | Prin2 | 3 | 10838771 | 36.18347982 | 6  | -0.116432701 | 158420 | '26.10'   | grmzm2g138<br>750_t01 | 'misc.cytochrome P450'                                                       |
| 1294 | Prin2 | 3 | 13300926 | 40.11756205 | 6  | -0.186344905 | 74628  | '34'      | grmzm2g116<br>053_t01 | 'transport'                                                                  |
| 1295 | Prin2 | 3 | 13633702 | 40.54785389 | 18 | -0.163225589 | 44412  | '29.4'    | grmzm2g129<br>482_t01 | 'protein.postranslational<br>modification'                                   |
| 1296 | Prin2 | 3 | 13634126 | 40.54840214 | 12 | -0.167661347 | 43988  | '29.4'    | grmzm2g129<br>482_t01 | 'protein.postranslational<br>modification'                                   |
| 1297 | Prin2 | 3 | 14416721 | 41.56032683 | 26 | -0.182957628 | 25363  | '20.1'    | grmzm2g062<br>576_t01 | 'stress.biotic'                                                              |
| 1298 | Prin2 | 3 | 17306447 | 45.29685092 | 9  | -0.237524461 | 20778  | '30.5'    | grmzm2g166<br>064_t01 | 'signalling.G-proteins'                                                      |
| 1299 | Prin2 | 3 | 19698629 | 48.39003196 | 8  | -0.195530153 | 2081   | '30.2.17' | grmzm2g467<br>671_t01 | 'signalling.receptor<br>kinases.DUF 26'                                      |



|            |   |           |             |    |              |                                       |                       |                                                                                    |
|------------|---|-----------|-------------|----|--------------|---------------------------------------|-----------------------|------------------------------------------------------------------------------------|
| 1300 Prin2 | 3 | 19800505  | 48.52176145 | 5  | -0.198444438 | 105632 '30.2.17'                      | grmzm2g412<br>760_t01 | 'signalling.receptor<br>kinases.DUF 26'                                            |
| 1301 Prin2 | 3 | 51981075  | 56.79858368 | 23 | 0.417597478  | 127495 '17.5.1'                       | grmzm2g363<br>893_t01 | 'hormone<br>metabolism.ethylene.synt<br>hesis-degradation'                         |
| 1302 Prin2 | 3 | 54021465  | 57.26319567 | 17 | 0.319862133  | 105966 '27.3.25'                      | grmzm2g051<br>256_t01 | 'RNA.regulation of<br>transcription.MYB<br>domain transcription<br>factor family'  |
| 1303 Prin2 | 3 | 106489882 | 58.60975416 | 5  | 0.31895293   | '29.5.11. ac206768.3_f<br>143297 4.2' | gt005                 | 'protein.degradation.ubiq<br>uitin.E3.RING'                                        |
| 1304 Prin2 | 3 | 136646099 | 63.07155567 | 5  | -0.237479608 | 235598 '3.8.2'                        | grmzm2g402<br>368_t01 | 'minor CHO<br>metabolism.galactose.alp<br>ha-galactosidases'                       |
| 1305 Prin2 | 3 | 171862276 | 82.33409418 | 6  | 0.513407834  | 6467 '27.3.25'                        | grmzm2g160<br>838_t01 | 'RNA.regulation of<br>transcription.MYB<br>domain transcription<br>factor family'  |
| 1306 Prin2 | 3 | 172148591 | 82.5754152  | 5  | 0.518185895  | '23.1.2.1<br>1267 '                   | grmzm2g339<br>699_t01 | 'nucleotide<br>metabolism.synthesis.pur<br>ine.amidophosphoribosyl<br>transferase' |
| 1307 Prin2 | 3 | 173219900 | 83.47836954 | 15 | 0.538906436  | 452174 '31.4'                         | grmzm2g439<br>532_t01 | 'cell.vesicle transport'                                                           |

|            |   |           |             |    |              |                 |                       |                                                                                         |
|------------|---|-----------|-------------|----|--------------|-----------------|-----------------------|-----------------------------------------------------------------------------------------|
| 1308 Prin2 | 3 | 193922818 | 101.9299488 | 10 | 0.197939448  | 180454 '11.3.3' | grmzm2g452<br>529_t01 | 'lipid<br>metabolism.Phospholipi<br>d<br>synthesis.phosphatidate<br>cytidyltransferase' |
| 1309 Prin2 | 3 | 198668625 | 105.7679086 | 5  | 0.17551164   | 209448 '33.99'  | grmzm2g022<br>625_t03 | 'development.unspecifie<br>d'                                                           |
| 1310 Prin2 | 4 | 828147    | 2.931410178 | 7  | 0.187879628  | 13616 '27.3.21' | grmzm2g163<br>427_t01 | 'RNA.regulation of<br>transcription.GRAS<br>transcription factor<br>family'             |
| 1311 Prin2 | 4 | 5696047   | 19.49225268 | 12 | -0.299402936 | 83431 '34.16'   | grmzm2g421<br>495_t01 | 'transport.ABC<br>transporters and<br>multidrug resistance<br>systems'                  |
| 1312 Prin2 | 4 | 42018416  | 54.27865297 | 7  | -0.145631996 | 61572 '20.1'    | grmzm2g304<br>049_t01 | 'stress.biotic'                                                                         |
| 1313 Prin2 | 4 | 96251735  | 57.74714448 | 7  | -0.124855363 | 596253 '24'     | grmzm2g064<br>193_t01 | 'Biodegradation of<br>Xenobiotics'                                                      |
| 1314 Prin2 | 4 | 125186338 | 58.42286198 | 72 | -0.130712371 | 97399 '31.1'    | grmzm2g145<br>027_t01 | 'cell.organisation'                                                                     |
| 1315 Prin2 | 4 | 177668855 | 89.1123214  | 6  | -0.18872756  | 1203 '12.1.2'   | grmzm2g079<br>381_t05 | 'N-metabolism.nitrate<br>metabolism.nitrite<br>reductase'                               |

|            |   |           |             |    |              |                          |                       |                                                                                   |
|------------|---|-----------|-------------|----|--------------|--------------------------|-----------------------|-----------------------------------------------------------------------------------|
| 1316 Prin2 | 4 | 199778387 | 105.9507817 | 14 | -0.193006416 | 79155 '30.3'             | grmzm2g332<br>660_t01 | 'signalling.calcium'                                                              |
| 1317 Prin2 | 4 | 242574395 | 130.3125709 | 11 | -0.281573519 | 3590 '20.1'              | grmzm2g410<br>963_t01 | 'stress.biotic'                                                                   |
| 1318 Prin2 | 5 | 929964    | 0.282533564 | 43 | -0.19293743  | 7785 '28.1.3'            | grmzm2g028<br>955_t01 | 'DNA.synthesis/chromatin structure.histone'                                       |
| 1319 Prin2 | 5 | 1574000   | 2.018545222 | 10 | -0.231021725 | 783 '17.2.1'             | grmzm2g125<br>552_t03 | 'hormone metabolism.auxin.synthesis-degradation'<br>'protein.synthesis.ribosomal' |
| 1320 Prin2 | 5 | 1580722   | 2.036636261 | 5  | -0.228448538 | '29.2.1.2<br>1523 .2.99' | grmzm2g125<br>784_t01 | protein.eukaryotic.60S subunit.unknown'                                           |
| 1321 Prin2 | 5 | 1842198   | 2.740351301 | 7  | -0.153703207 | 7308 '27.3.28'           | grmzm2g138<br>421_t01 | 'RNA.regulation of transcription.SBP,Squamosa promoter binding protein family'    |
| 1322 Prin2 | 5 | 2347751   | 4.958870956 | 12 | -0.152516959 | 8604 '34.99'             | grmzm2g003<br>108_t01 | 'transport.misc'                                                                  |
| 1323 Prin2 | 5 | 7094245   | 26.093099   | 26 | 0.150251126  | 7400 '27.3.54'           | grmzm2g129<br>817_t03 | 'RNA.regulation of transcription.Histone acetyltransferases'                      |
| 1324 Prin2 | 5 | 10372835  | 33.33515135 | 9  | 0.176034799  | 18639 '27.3.67'          | grmzm2g408<br>897_t01 | 'RNA.regulation of transcription.putative transcription regulator'                |

|            |   |           |             |    |              |                         |                       |                                                                                                 |
|------------|---|-----------|-------------|----|--------------|-------------------------|-----------------------|-------------------------------------------------------------------------------------------------|
| 1325 Prin2 | 5 | 26734713  | 54.84190728 | 11 | 0.353426391  | 100370 '16.8.2'         | grmzm2g477<br>683_t01 | 'secondary<br>metabolism.flavonoids.c<br>halcones'                                              |
| 1326 Prin2 | 5 | 73804215  | 66.39516104 | 21 | 0.292651485  | 109286 '34.12'          | grmzm2g168<br>747_t01 | 'transport.metal'                                                                               |
| 1327 Prin2 | 5 | 108262797 | 70.32363616 | 14 | 0.366236504  | 998325 '26.10'          | grmzm2g045<br>319_t01 | 'misc.cytochrome P450'                                                                          |
| 1328 Prin2 | 5 | 143236820 | 72.10704824 | 7  | 0.356617661  | 124991 '3.6'            | grmzm2g111<br>529_t01 | 'minor CHO<br>metabolism.callose'                                                               |
| 1329 Prin2 | 5 | 164299446 | 76.94625198 | 6  | -0.300410103 | '29.4.1.5<br>26700 7'   | grmzm2g137<br>468_t01 | 'protein.postranslational<br>modification.kinase.rece<br>ptor like cytoplasmatic<br>kinase VII' |
| 1330 Prin2 | 5 | 165991682 | 78.08035909 | 12 | 0.301900822  | 268599 '27.3.11'        | grmzm2g320<br>287_t01 | 'RNA.regulation of<br>transcription.C2H2 zinc<br>finger family'                                 |
| 1331 Prin2 | 5 | 169382477 | 81.27535729 | 5  | -0.317414291 | '29.5.11.<br>85025 4.2' | grmzm2g071<br>484_t01 | 'protein.degradation.ubiq<br>uitin.E3.RING'                                                     |
| 1332 Prin2 | 5 | 188788930 | 98.54955746 | 8  | 0.15465899   | 170393 '17.2.3'         | grmzm2g391<br>596_t01 | 'hormone<br>metabolism.auxin.induce<br>d-regulated-responsive-<br>activated'                    |

|      |       |   |           |              |    |              |        |           |                       |                                                                                     |
|------|-------|---|-----------|--------------|----|--------------|--------|-----------|-----------------------|-------------------------------------------------------------------------------------|
| 1333 | Prin2 | 5 | 194052252 | 102.6015186  | 6  | 0.184420996  | 134834 | '27.3.6'  | grmzm2g144<br>097_t01 | 'RNA.regulation of transcription.bHLH,Basic Helix-Loop-Helix family'                |
| 1334 | Prin2 | 5 | 203652758 | 113.8406769  | 6  | 0.258309313  | 560    | '27.3.6'  | grmzm2g317<br>450_t01 | 'RNA.regulation of transcription.bHLH,Basic Helix-Loop-Helix family'                |
| 1335 | Prin2 | 5 | 205472185 | 119.231778   | 50 | 0.148970386  | 17704  | '27.3.25' | grmzm2g053<br>396_t01 | 'RNA.regulation of transcription.MYB domain transcription factor family'            |
| 1336 | Prin2 | 5 | 207751210 | 125.7483283  | 10 | 0.22159592   | 80383  | '30.1.1'  | grmzm2g081<br>214_t01 | 'signalling.in sugar and nutrient physiology'                                       |
| 1337 | Prin2 | 5 | 209217720 | 128.3485035  | 30 | 0.293163871  | 24073  | '29.4'    | grmzm2g058<br>220_t01 | 'protein.postranslational modification'                                             |
| 1338 | Prin2 | 5 | 209930161 | 130.9277607  | 5  | 0.227274598  | 5968   | '30.11'   | grmzm2g104<br>920_t01 | 'signalling.light'<br>'cell wall.degradation.pectate lyases and polygalacturonases' |
| 1339 | Prin2 | 6 | 867384    | -9.864659918 | 6  | 0.365645779  | 369074 | '10.6.3'  | grmzm2g004<br>435_t01 | 'misc.invertase/pectin methylesterase inhibitor family protein'                     |
| 1340 | Prin2 | 6 | 1957524   | -8.627816461 | 8  | 0.454475095  | 35346  | '26.18'   | ac186577.3_f<br>gt006 | 'misc.invertase/pectin methylesterase inhibitor family protein'                     |
| 1341 | Prin2 | 6 | 118739798 | 43.69898027  | 13 | -0.578903834 | 1033   | '30.3'    | grmzm2g174<br>315_t02 | 'signalling.calcium'                                                                |

|      |       |   |           |             |    |              |        |           |                       |                                                                                      |
|------|-------|---|-----------|-------------|----|--------------|--------|-----------|-----------------------|--------------------------------------------------------------------------------------|
| 1342 | Prin2 | 6 | 119772986 | 44.24786955 | 73 | -0.412080895 | 121392 | '30.1'    | grmzm2g162<br>788_t01 | 'signalling.in sugar and<br>nutrient physiology'                                     |
| 1343 | Prin2 | 6 | 120956190 | 44.6914035  | 7  | -0.327835409 | 105351 | '23.1.2.9 | grmzm2g164<br>665_t01 | 'nucleotide<br>metabolism.synthesis.pur<br>ine.AICAR<br>transformylase'              |
| 1344 | Prin2 | 6 | 165586711 | 102.9473046 | 27 | -0.297375391 | 132286 | '11.9.2.1 | ac231411.1_f<br>gt011 | 'lipid metabolism.lipid<br>degradation.lipases.triac<br>ylglycerol lipase'           |
| 1345 | Prin2 | 6 | 165589669 | 102.9571143 | 8  | -0.289894217 | 129328 | '11.9.2.1 | ac231411.1_f<br>gt011 | 'lipid metabolism.lipid<br>degradation.lipases.triac<br>ylglycerol lipase'           |
| 1346 | Prin2 | 6 | 165667455 | 103.215079  | 20 | -0.261489914 | 51542  | '11.9.2.1 | ac231411.1_f<br>gt011 | 'lipid metabolism.lipid<br>degradation.lipases.triac<br>ylglycerol lipase'           |
| 1347 | Prin2 | 6 | 165667652 | 103.2157324 | 5  | -0.237252512 | 51345  | '11.9.2.1 | ac231411.1_f<br>gt011 | 'lipid metabolism.lipid<br>degradation.lipases.triac<br>ylglycerol lipase'           |
| 1348 | Prin2 | 6 | 166076222 | 104.570689  | 13 | -0.302483541 | 96501  | '27.3.9'  | grmzm2g325<br>850_t01 | 'RNA.regulation of<br>transcription.C2C2(Zn)<br>GATA transcription<br>factor family' |
| 1349 | Prin2 | 7 | 5428540   | 23.50772999 | 34 | -0.287429645 | 1932   | '1.2.2'   | grmzm2g129<br>246_t01 | 'PS.photorespiration.glyc<br>olate oxydase'                                          |
| 1350 | Prin2 | 7 | 22002213  | 45.79983088 | 10 | -0.179913126 | 140251 | '27.3.71' | grmzm2g431<br>900_t01 | 'RNA.regulation of<br>transcription.SNF7'                                            |

|            |   |           |             |    |              |                  |                       |                                                                         |
|------------|---|-----------|-------------|----|--------------|------------------|-----------------------|-------------------------------------------------------------------------|
| 1351 Prin2 | 7 | 27302170  | 46.77471414 | 16 | -0.174347347 | 23532 '34.13'    | grmzm2g156<br>794_t01 | 'transport.peptides and<br>oligopeptides'                               |
| 1352 Prin2 | 7 | 27327128  | 46.7793044  | 9  | -0.205664769 | 64745 '33.99'    | grmzm2g086<br>757_t01 | 'development.unspecific<br>d'                                           |
| 1353 Prin2 | 7 | 29146881  | 47.11399196 | 45 | -0.189498059 | 5436 '34.12'     | grmzm2g147<br>560_t01 | 'transport.metal'                                                       |
| 1354 Prin2 | 7 | 124223168 | 64.44761155 | 10 | -0.142549038 | 148496 '29.5.11' | ac225205.3_f<br>gt003 | 'protein.degradation.ubiq<br>uitin'                                     |
| 1355 Prin2 | 7 | 156185236 | 98.49923581 | 6  | -0.608676503 | 16449 '34.1'     | grmzm2g411<br>916_t01 | 'transport.p- and v-<br>ATPases'                                        |
| 1356 Prin2 | 7 | 156689760 | 99.54520289 | 27 | -0.178439732 | 49383 '26.22'    | grmzm2g076<br>981_t02 | 'misc.short chain<br>dehydrogenase/reductase<br>(SDR)'                  |
| 1357 Prin2 | 7 | 166657242 | 123.8438631 | 41 | 0.243268708  | 67872 '20.2.2'   | grmzm2g364<br>643_t01 | 'stress.abiotic.cold'                                                   |
| 1358 Prin2 | 7 | 167223656 | 126.3055595 | 17 | 0.239027751  | 3332 '34.15'     | grmzm2g166<br>738_t01 | 'transport.potassium'                                                   |
| 1359 Prin2 | 7 | 168146779 | 130.3175518 | 8  | 0.250707874  | 10085 '27.3.8'   | ac155434.2_f<br>gt006 | 'RNA.regulation of<br>transcription.C2C2(Zn)<br>DOF zinc finger family' |

|            |   |           |             |    |              |                      |                       |                                                                                                                                           |
|------------|---|-----------|-------------|----|--------------|----------------------|-----------------------|-------------------------------------------------------------------------------------------------------------------------------------------|
| 1360 Prin2 | 7 | 168157307 | 130.3633076 | 7  | 0.263440613  | 25193 '26.10'        | grmzm2g425<br>127_t01 | 'misc.cytochrome P450'                                                                                                                    |
| 1361 Prin2 | 8 | 10739260  | 27.73471036 | 6  | -0.202260838 | 132779 '34.16'       | grmzm2g119<br>345_t01 | 'transport.ABC<br>transporters and<br>multidrug resistance<br>systems'                                                                    |
| 1362 Prin2 | 8 | 103399576 | 58.8624408  | 6  | 0.15144341   | '16.1.2.7<br>34765 ' | grmzm2g145<br>029_t01 | 'secondary<br>metabolism.isoprenoids.<br>mevalonate<br>pathway.isopentenyl<br>pyrophosphate:dimethyl<br>allyl pyrophosphate<br>isomerase' |
| 1363 Prin2 | 8 | 159090160 | 87.53999331 | 9  | 0.172388561  | 3852 '26.2'          | grmzm2g134<br>308_t02 | 'misc.UDP glucosyl and<br>glucoronyl transferases'                                                                                        |
| 1364 Prin2 | 8 | 160611990 | 89.64768912 | 20 | 0.195427349  | 10164 '23.3.3'       | grmzm2g013<br>060_t01 | 'nucleotide<br>metabolism.salvage.NU<br>DIX hydrolases'                                                                                   |
| 1365 Prin2 | 8 | 160612122 | 89.6479463  | 28 | 0.216705415  | 10032 '23.3.3'       | grmzm2g013<br>060_t01 | 'nucleotide<br>metabolism.salvage.NU<br>DIX hydrolases'                                                                                   |
| 1366 Prin2 | 8 | 164575465 | 99.62773322 | 5  | 0.134691981  | 16971 '27.3.25'      | grmzm2g405<br>094_t01 | 'RNA.regulation of<br>transcription.MYB<br>domain transcription<br>factor family'                                                         |
| 1367 Prin2 | 8 | 170618195 | 123.1071582 | 8  | 0.141301951  | 5058 '20.2.99'       | grmzm2g106<br>690_t01 | 'stress.abiotic.unspecifie<br>d'                                                                                                          |
| 1368 Prin2 | 8 | 170786240 | 123.7938509 | 6  | 0.133385539  | 142971 '29.5.7'      | grmzm2g133<br>249_t01 | 'protein.degradation.met<br>alloprotease'                                                                                                 |



|            |   |           |              |    |              |                  |                       |                                                                              |
|------------|---|-----------|--------------|----|--------------|------------------|-----------------------|------------------------------------------------------------------------------|
| 1369 Prin2 | 8 | 173793234 | 135.8235771  | 8  | 0.119843765  | 2576 '29.5'      | grmzm2g118<br>806_t01 | 'protein.degradation'                                                        |
| 1370 Prin2 | 8 | 173864083 | 136.1091964  | 9  | 0.124329055  | 12896 '30.3'     | ac203173.3_f<br>gt001 | 'signalling.calcium'                                                         |
| 1371 Prin2 | 9 | 2701441   | -3.388186607 | 59 | -0.379560098 | 6507 '27.2'      | grmzm2g180<br>836_t01 | 'RNA.transcription'                                                          |
| 1372 Prin2 | 9 | 3689306   | -0.719907238 | 18 | -0.378505593 | 84069 '2.2.1.1'  | grmzm2g072<br>091_t01 | 'major CHO<br>metabolism.degradation.<br>sucrose.fructokinase'               |
| 1373 Prin2 | 9 | 7182819   | 8.716269429  | 14 | -0.268943698 | 56750 '17.7.1.5' | grmzm2g000<br>236_t01 | 'hormone<br>metabolism.jasmonate.synthesis-degradation.12-Oxo-PDA-reductase' |
| 1374 Prin2 | 9 | 109417983 | 53.84202072  | 8  | 0.254711069  | 127216 '27.3.67' | ac225193.3_f<br>gt003 | 'RNA.regulation of<br>transcription.putative<br>transcription regulator'     |
| 1375 Prin2 | 9 | 109658976 | 53.91939367  | 7  | 0.188444788  | 32637 '26.13'    | grmzm2g007<br>754_t01 | 'misc.acid and other<br>phosphatases'                                        |
| 1376 Prin2 | 9 | 117715320 | 57.64391617  | 6  | 0.137706712  | 78991 '10.8.1'   | grmzm2g314<br>663_t01 | 'cell<br>wall.pectin*esterases.PME'                                          |
| 1377 Prin2 | 9 | 138570437 | 79.39501909  | 34 | 0.310626673  | 10685 '20.1'     | grmzm2g149<br>809_t01 | 'stress.biotic'                                                              |

|            |    |          |             |    |              |                         |                       |                                                                                      |
|------------|----|----------|-------------|----|--------------|-------------------------|-----------------------|--------------------------------------------------------------------------------------|
| 1378 Prin2 | 10 | 5058530  | 14.79019912 | 46 | -0.424128374 | 56738 '30.2.26'         | grmzm2g051<br>637_t01 | 'signalling.receptor<br>kinases.crinkly like'                                        |
| 1379 Prin2 | 10 | 5427445  | 17.07840286 | 12 | -0.377394519 | 16980 '27.3.35'         | grmzm2g365<br>754_t01 | 'RNA.regulation of<br>transcription.bZIP<br>transcription factor<br>family'          |
| 1380 Prin2 | 10 | 6191195  | 21.4060557  | 6  | -0.359938003 | 84745 '27.3.22'         | grmzm2g060<br>050_t01 | 'RNA.regulation of<br>transcription.HB,Homeo<br>box transcription factor<br>family'  |
| 1381 Prin2 | 10 | 9023970  | 24.98301526 | 9  | -0.188824159 | 56220 '27.3.9'          | grmzm2g324<br>131_t01 | 'RNA.regulation of<br>transcription.C2C2(Zn)<br>GATA transcription<br>factor family' |
| 1382 Prin2 | 10 | 22382517 | 34.8358978  | 9  | 0.185011049  | 28293 '10.6.3'          | grmzm2g113<br>815_t01 | 'cell<br>wall.degradation.pectate<br>lyases and<br>polygalacturonases'               |
| 1383 Prin2 | 10 | 24154443 | 35.31258248 | 6  | 0.360806077  | 289086 '21.1'           | grmzm2g141<br>848_t01 | 'redox.thioredoxin'                                                                  |
| 1384 Prin2 | 10 | 79797589 | 39.13112595 | 6  | 0.260220052  | 33428 '34.13'           | grmzm2g086<br>496_t01 | 'transport.peptides and<br>oligopeptides'                                            |
| 1385 Prin2 | 10 | 85540940 | 40.43084945 | 25 | 0.314408789  | 45425 '26.12'           | grmzm2g006<br>727_t01 | 'misc.peroxidases'                                                                   |
| 1386 Prin2 | 10 | 86726870 | 40.71912634 | 15 | 0.304643229  | '29.5.11. 194374 4.3.2' | grmzm2g028<br>014_t01 | 'protein.degradation.ubiq<br>uitin.E3.SCF.FBOX'                                      |

|      |       |    |           |             |    |              |                         |                       |                                                                                                                            |
|------|-------|----|-----------|-------------|----|--------------|-------------------------|-----------------------|----------------------------------------------------------------------------------------------------------------------------|
| 1387 | Prin2 | 10 | 113194309 | 45.32268893 | 8  | 0.36996183   | '13.1.6.3<br>119976 .1' | grmzm2g125<br>923_t01 | 'amino acid<br>metabolism.synthesis.aro<br>matic<br>aa.phenylalanine.rogena<br>te dehydratase /<br>prephenate dehydratase' |
| 1388 | Prin2 | 10 | 133029713 | 57.10017332 | 5  | -0.138816574 | 93976 '27.3.7'          | grmzm2g098<br>442_t01 | 'RNA.regulation of<br>transcription.C2C2(Zn)<br>CO-like, Constans-like<br>zinc finger family'                              |
| 1389 | Prin2 | 10 | 142607850 | 78.31225962 | 6  | -0.114292892 | 1640 '29.5.2'           | grmzm2g419<br>694_t01 | 'protein.degradation.auto<br>phagy'                                                                                        |
| 1390 | Prin2 | 10 | 142607858 | 78.31228969 | 7  | -0.146722504 | 1632 '29.5.2'           | grmzm2g419<br>694_t01 | 'protein.degradation.auto<br>phagy'                                                                                        |
| 1391 | Prin2 | 10 | 142646940 | 78.45920294 | 5  | -0.242947614 | 401 '2.1.2.2'           | grmzm2g121<br>612_t01 | 'major CHO<br>metabolism.synthesis.sta<br>rch.starch synthase'                                                             |
| 1392 | Prin2 | 10 | 143724295 | 81.34148153 | 8  | -0.154720679 | '17.1.1.1<br>43851 .10' | ac188128.3_f<br>gt002 | 'hormone<br>metabolism.abscisic<br>acid.synthesis-<br>degradation.synthesis.9-<br>cis-epoxycarotenoid<br>dioxygenase'      |
| 1393 | Prin2 | 10 | 144247405 | 82.22431479 | 10 | -0.222878534 | 33015 '27.2'            | grmzm2g427<br>031_t01 | 'RNA.transcription'                                                                                                        |

1394 Prin2 10 144605053 83.42035782

8 -0.228222027

21295 '11.1.3'

grmzm2g003

190\_t01

'lipid metabolism.FA  
synthesis and FA  
elongation.ketoacyl ACP  
synthase'

ning or adjacent to detected SNPs

to functional categories

o acids; Prot, protein; Prin1: principal component 1; Prin2: principal component 2.

---

---

**Predicted Gene Containing SNP**

---

---

---

**Description**

---

'moderately similar to ( 260) AT1G34670 | Symbols: AtMYB93 | AtMYB93 (myb domain protein 93); DNA binding / transcription factor | chr1:12709128-12710423 FORWARDmoderately similar to ( 201) ODO1\_PETHY ODORANT1 protein (MYB-like protein ODO1) - Petunia hybrida (Petunia)moderately similar to ( 286) loc\_os08g37970 12008.m07782 protein myb-like DNA-binding domain containing protein, expressed seq=cds; coord=1:182542564..182543903:-1; parent\_gene=GRMZM2G110135'

'moderately similar to ( 483) AT3G23820 | Symbols: GAE6 | GAE6 (UDP-D-GLUCURONATE 4-EPIMERASE 6); UDP-glucuronate 4-epimerase/ catalytic | chr3:8603645-8605027 FORWARDhighly similar to ( 659) loc\_os08g41440 12008.m08122 protein NAD-dependent epimerase/dehydratase family protein, putative, expressed seq=cds; coord=1:192730986..192732596:-1; parent\_gene=GRMZM2G161233'

'highly similar to ( 884) AT1G09890 | Symbols: | lyase | chr1:3214237-3217386 REVERSEearly identical (1221) loc\_os08g44020 12008.m080048 protein lyase, putative, expressed seq=cds; coord=1:206155710..206160274:-1; parent\_gene=GRMZM2G154124'

'moderately similar to ( 255) AT4G32300 | Symbols: SD2-5 | SD2-5 (S-DOMAIN-2 5); carbohydrate binding / kinase/ protein kinase | chr4:15599970-15602435 FORWARDweakly similar to ( 172) KPRO\_MAIZE Putative receptor protein kinase ZmPK1 precursor (EC 2.7.11.1) - Zea mays (Maize)highly similar to ( 568) loc\_os04g56110 12004.m35493 protein ATP binding protein, putative, expressed seq=cds; coord=2:4464619..4466714:-1; parent\_gene=GRMZM2G076212'

'highly similar to ( 613) AT2G24360 | Symbols: | serine/threonine/tyrosine kinase, putative | chr2:10364742-10366075 REVERSEweakly similar to ( 116) NORK\_PEA Nodulation receptor kinase precursor (EC 2.7.11.1) - Pisum sativum (Garden pea)highly similar to ( 771) loc\_os04g51950 12004.m10090 protein serine/threonine protein kinase, putative, expressed seq=cds; coord=2:11197500..11203331:1; parent\_gene=GRMZM2G102088'

'moderately similar to ( 379) AT5G06839 | Symbols: | bZIP family transcription factor | chr5:2120911-2126217 FORWARDmoderately similar to ( 319) TGA21\_TOBAC TGACG-sequence-specific DNA-binding protein TGA-2.1 (TGA2.1) - Nicotiana tabacum (Common tobacco)highly similar to ( 656) loc\_os09g31390 12009.m22141 protein DNA binding protein, putative, expressed seq=cds; coord=2:189820806..189829874:-1; parent\_gene=GRMZM2G125934'

'moderately similar to ( 230) AT5G58900 | Symbols: | myb family transcription factor | chr5:23783275-23784667 REVERSEmoderately similar to ( 342) loc\_os01g63460 12001.m12462 protein MYB transcription factor, putative, expressed seq=cds; coord=3:178553778..178555626:1; parent\_gene=GRMZM2G125522'

'moderately similar to ( 439) AT1G06520 | Symbols: ATGPAT1, GPAT1 | GPAT1 (GLYCEROL-3-PHOSPHATE ACYLTRANSFERASE 1); 1-acylglycerol-3-phosphate O-acyltransferase/ acyltransferase | chr1:1994170-1996067 REVERSEhighly similar to ( 736) loc\_os01g44069 12001.m10665 protein glycerol-3-phosphate acyltransferase 1, putative, expressed seq=cds; coord=3:216522432..216528663:-1; parent\_gene=GRMZM2G065203'

'weakly similar to ( 133) AT5G25190 | Symbols: | ethylene-responsive element-binding protein, putative | chr5:8707007-8707655 REVERSEweakly similar to ( 174) loc\_os02g55380 12002.m10564 protein ethylene response factor 1, putative, expressed seq=cds; coord=4:173800132..173801383:1; parent\_gene=GRMZM2G111415'

'highly similar to ( 570) AT3G47570 | Symbols: | leucine-rich repeat transmembrane protein kinase, putative | chr3:17527611-17530748 FORWARDmoderately similar to ( 298) RPK1\_IPONI Receptor-like protein kinase precursor (EC 2.7.11.1) - Ipomoea nil (Japanese morning glory) (Pharbitis nil)nearly identical (1077) loc\_os01g05960 12001.m07227 protein ATP binding protein, putative, expressed seq=cds; coord=4:239702248..239706103:-1; parent\_gene=GRMZM2G322348'

'moderately similar to ( 284) AT5G58490 | Symbols: | cinnamoyl-CoA reductase family | chr5:23643068-23644455 FORWARDweakly similar to ( 125) DFRA\_VITVI Dihydroflavonol-4-reductase (EC 1.1.1.219) (DFR) (Dihydrokaempferol 4-reductase) - Vitis vinifera (Grape)moderately similar to ( 352) loc\_os03g60380 12003.m10928 protein dihydroflavonol-4-reductase, putative, expressed seq=cds; coord=5:2594160..2603545:-1; parent\_gene=GRMZM2G110881'

'moderately similar to ( 248) AT5G58490 | Symbols: | cinnamoyl-CoA reductase family | chr5:23643068-23644455 FORWARDweakly similar to ( 143) DFRA\_DIACA Dihydroflavonol-4-reductase (EC 1.1.1.219) (DFR) (Dihydrokaempferol 4-reductase) - Dianthus caryophyllus (Carnation) (Clove pink)moderately similar to ( 261) loc\_os03g60380 12003.m10928 protein dihydroflavonol-4-reductase, putative, expressed seq=cds; coord=5:2604483..2606065:-1; parent\_gene=GRMZM2G410865'

'moderately similar to ( 272) AT1G17810 | Symbols: BETA-TIP | BETA-TIP (BETA-TONOPLAST INTRINSIC PROTEIN); water channel | chr1:6130209-6131442 FORWARDmoderately similar to ( 379) TIP31\_ORYSA Probable aquaporin TIP3.1 (Tonoplast intrinsic protein 3.1) (OsTIP3.1) - Oryza sativa (Rice)moderately similar to ( 379) loc\_os10g35050 12010.m06328 protein aquaporin TIP3.1, putative, expressed seq=cds; coord=5:25511080..25512421:1; parent\_gene=GRMZM2G305446'

'weakly similar to ( 123) AT1G56120 | Symbols: | kinase | chr1:20987288-20993072 REVERSEmoderately similar to ( 243) loc\_os11g28104 12011.m06728 protein protein kinase, putative, expressed seq=cds; coord=5:27198279..27204222:-1; parent\_gene=GRMZM2G102862'

'weakly similar to ( 125) AT1G04500 | Symbols: | zinc finger CONSTANS-related | chr1:1221757-1224235 REVERSEmoderately similar to ( 315) loc\_os10g32900 12010.m065283 protein CCT motif family protein, expressed seq=cds; coord=5:30600307..30602869:-1; parent\_gene=GRMZM2G123550'

'weakly similar to ( 114) AT4G35840 | Symbols: | zinc finger (C3HC4-type RING finger) family protein | chr4:16981083-16982266 FORWARDweakly similar to ( 198) loc\_os06g50370 12006.m09561 protein RING-H2 finger protein ATL2B, putative, expressed seq=cds; coord=5:61801847..61803639:1; parent\_gene=GRMZM2G069923'

'highly similar to ( 738) AT1G62830 | Symbols: LDL1, SWP1, ATSWP1 | LDL1 (LSD1-LIKE1); amine oxidase/  
electron carrier/ oxidoreductase | chr1:23264638-23267172 REVERSEweakly similar to ( 107) PAO\_MAIZE  
Polyamine oxidase precursor (EC 1.5.3.11) - Zea mays (Maize)nearly identical (1155) loc\_os02g51880 12002.m10219  
protein amine oxidase/ oxidoreductase, putative, expressed seq=cds; coord=5:208426880..208429748:1;  
parent\_gene=GRMZM2G059958'

'moderately similar to ( 382) AT5G14180 | Symbols: MPL1 | MPL1 (MYZUS PERSICAE-INDUCED LIPASE 1);  
catalytic | chr5:4571442-4574413 REVERSEhighly similar to ( 595) loc\_os06g42860 12006.m08816 protein gastric  
triacylglycerol lipase precursor, putative, expressed seq=cds; coord=6:97382174..97384634:-1;  
parent\_gene=GRMZM2G322892'

'nearly identical (1598) AT5G42390 | Symbols: | metalloendopeptidase | chr5:16945308-16952647 FORWARDnearly  
identical (2070) loc\_os06g41990 12006.m32119 protein metalloendopeptidase, putative, expressed seq=cds;  
coord=6:98000549..98014552:1; parent\_gene=GRMZM2G073312'

'nearly identical (1598) AT5G42390 | Symbols: | metalloendopeptidase | chr5:16945308-16952647 FORWARDnearly  
identical (2070) loc\_os06g41990 12006.m32119 protein metalloendopeptidase, putative, expressed seq=cds;  
coord=6:98000549..98014552:1; parent\_gene=GRMZM2G073312'

'moderately similar to ( 393) AT2G17410 | Symbols: | ARID/BRIGHT DNA-binding domain-containing protein |  
chr2:7559869-7563474 FORWARDhighly similar to ( 562) loc\_os06g41730 12006.m31901 protein ARID/BRIGHT  
DNA binding domain containing protein, expressed seq=cds; coord=6:98085270..98091283:-1;  
parent\_gene=GRMZM2G180654'



'highly similar to ( 748) AT1G19440 | Symbols: KCS4 | KCS4 (3-KETOACYL-COA SYNTHASE 4); acyltransferase/ catalytic/ transferase, transferring acyl groups other than amino-acyl groups | chr1:6729119-6730669 FORWARDhighly similar to ( 858) loc\_os05g49290 12005.m27982 protein acyltransferase, putative, expressed seq=cds; coord=6:165162158..165164637:-1; parent\_gene=GRMZM2G160417'

'moderately similar to ( 220) AT3G57880 | Symbols: | C2 domain-containing protein | chr3:21431198-21433519 REVERSEmoderately similar to ( 252) loc\_os07g30020 12007.m07273 protein phosphoribosylanthranilate transferase, putative, expressed seq=cds; coord=7:148849994..148855647:-1; parent\_gene=GRMZM2G416484'

'highly similar to ( 755) AT1G02730 | Symbols: ATCSLD5, CSLD5 | ATCSLD5; 1,4-beta-D-xylan synthase/ cellulose synthase | chr1:594697-598473 REVERSEnearly identical (1262) loc\_os07g36690 12007.m07919 protein CSLF2 - cellulose synthase-like family F; beta1,3;1,4 glucan synthase, expressed seq=cds; coord=7:156222296..156226604:-1; parent\_gene=GRMZM2G103972'

'weakly similar to ( 122) AT5G48930 | Symbols: HCT | HCT (HYDROXYCINNAMOYL-COA SHIKIMATE/QUINATE HYDROXYCINNAMOYL TRANSFERASE); quinate O-hydroxycinnamoyltransferase/ shikimate O-hydroxycinnamoyltransferase/ transferase | chr5:19836654-19838092 REVERSEweakly similar to ( 115) HCBT1\_DIACA Anthranilate N-benzoyltransferase protein 1 (EC 2.3.1.144) (Anthranilate N-hydroxycinnamoyl/benzoyltransferase 1) - Dianthus caryophyllus (Carnation) (Clove pink)highly similar to ( 553) loc\_os09g37180 12009.m06666 protein anthranilate N-benzoyltransferase protein 1, putative, expressed seq=cds; coord=7:174995238..174996574:-1; parent\_gene=GRMZM2G307437'

'moderately similar to ( 488) AT2G13620 | Symbols: ATCHX15, CHX15 | ATCHX15; monovalent cation:proton antiporter/ sodium:hydrogen antiporter | chr2:5678006-5680621 FORWARDnearly identical (1223) loc\_os05g39600 12005.m08138 protein ATCHX15, putative, expressed seq=cds; coord=8:118670851..118676392:1; parent\_gene=GRMZM2G366851'

'very weakly similar to (85.5) loc\_os07g39960 12007.m08238 protein zinc finger, C2H2 type family protein seq=cds; coord=8:163179500..163179916:1; parent\_gene=AC183950.2\_FG002'

'moderately similar to ( 328) AT1G21890 | Symbols: | nodulin MtN21 family protein | chr1:7682808-7685581  
REVERSEmoderately similar to ( 478) loc\_os06g10750 12006.m05792 protein nodulin protein, putative, expressed  
seq=cds; coord=9:8432717..8434846:-1; parent\_gene=GRMZM2G088053'

'moderately similar to ( 264) AT1G75050 | Symbols: | FUNCTIONS IN: molecular\_function unknown; INVOLVED  
IN: response to other organism; LOCATED IN: endomembrane system; EXPRESSED IN: 6 plant structures;  
EXPRESSED DURING: 4 anthesis, petal differentiation and expansion stage; CONTAINS InterPro DOMAIN/s:  
Thaumatococcus danianus protein match is: ATLP-3 (TAIR:AT1G75030.1); Has 1070 Blast hits to 1056 proteins in 144  
species: Archae - 0; Bacteria - 18; Metazoa - 48; Fungi - 48; Plants - 944; Viruses - 4; Other Eukaryotes - 8 (source:  
NCBI BLINK). | chr1:28180116-28181062 FORWARDmoderately similar to ( 201) TP1A\_MALDO Thaumatococcus-like  
protein 1a precursor (Allergen Mal d 2) (Mdt11) (Pathogenesis-related protein 5a) (PR-5a) - Malus domestica (Apple)  
(Malus sylvestris)moderately similar to ( 370) loc\_os03g13070 12003.m06753 protein pathogenesis-related protein 5  
precursor, putative seq=cds; coord=9:145169132..145170513:-1; parent\_gene=GRMZM2G393507'

'moderately similar to ( 254) AT3G23730 | Symbols: | xyloglucan:xyloglucosyl transferase, putative / xyloglucan  
endotransglycosylase, putative / endo-xyloglucan transferase, putative | chr3:8550222-8551248 FORWARDmoderately  
similar to ( 246) BRU1\_SOYBN Brassinosteroid-regulated protein BRU1 precursor - Glycine max  
(Soybean)moderately similar to ( 327) loc\_os08g13980 12008.m05523 protein xyloglucan  
endotransglucosylase/hydrolase protein 15 precursor, putative, expressed seq=cds;  
coord=10:141250965..141252692:1; parent\_gene=GRMZM2G091303'

'moderately similar to ( 423) AT2G17700 | Symbols: | protein kinase family protein | chr2:7685778-7689278  
REVERSEweakly similar to ( 115) NORK\_MEDTR Nodulation receptor kinase precursor (EC 2.7.11.1) (Does not  
make infections protein 2) (Symbiosis receptor-like kinase) (MtSYMRK) - Medicago truncatula (Barrel medic)highly  
similar to ( 679) loc\_os04g59000 12004.m10778 protein ATP binding protein, putative, expressed seq=cds;  
coord=10:148973414..148980886:-1; parent\_gene=GRMZM2G104658'

'moderately similar to ( 266) AT5G17540 | Symbols: | transferase family protein | chr5:5782061-5783682  
REVERSEweakly similar to ( 109) HCBT1\_DIACA Anthranilate N-benzoyltransferase protein 1 (EC 2.3.1.144)  
(Anthranilate N-hydroxycinnamoyl/benzoyltransferase 1) - Dianthus caryophyllus (Carnation) (Clove pink)highly  
similar to ( 546) loc\_os10g11980 12010.m04516 protein transferase family protein, expressed seq=cds;  
coord=1:115337828..115339542:-1; parent\_gene=GRMZM2G107851'

'very weakly similar to (84.7) AT2G34730 | Symbols: | myosin heavy chain-related | chr2:14654611-14657443  
FORWARDhighly similar to ( 842) loc\_os03g57110 12003.m35440 protein expressed protein seq=cds;  
coord=1:285132040..285136056:-1; parent\_gene=GRMZM2G058734'

'highly similar to ( 934) AT2G02220 | Symbols: ATPSKR1, PSKR1 | PSKR1 (PHYTOSULFOKIN RECEPTOR 1);  
ATP binding / peptide receptor/ protein serine/threonine kinase | chr2:584098-587124 REVERSEhighly similar to ( 910)  
PSKR\_DAUCA Phytosulfokine receptor precursor (EC 2.7.11.1) (Phytosulfokine LRR receptor kinase) - Daucus  
carota (Carrot)nearly identical (1459) loc\_os04g57630 12004.m10648 protein phytosulfokine receptor precursor,  
putative, expressed seq=cds; coord=2:2222100..2225911:1; parent\_gene=GRMZM2G452142'

'weakly similar to ( 188) AT5G06800 | Symbols: | myb family transcription factor | chr5:2103374-2105680  
FORWARDmoderately similar to ( 379) loc\_os04g56990 12004.m101684 protein transfactor, putative, expressed  
seq=cds; coord=2:3105142..3108209:1; parent\_gene=GRMZM2G035370'

'highly similar to ( 679) AT1G17840 | Symbols: WBC11, ABCG11, DSO, COF1, ATWBC11 | WBC11 (WHITE-BROWN COMPLEX HOMOLOG PROTEIN 11); ATPase, coupled to transmembrane movement of substances / fatty acid transporter | chr1:6142870-6145894 FORWARDweakly similar to ( 115) PDR3\_TOBAC Pleiotropic drug resistance protein 3 (NtPDR3) - Nicotiana tabacum (Common tobacco)highly similar to ( 753) loc\_os04g44610 12004.m09420 protein ABC transporter C05D10.3 in chromosome III, putative, expressed seq=cds; coord=2:23874538..23877737:-1; parent\_gene=GRMZM2G177812'

'weakly similar to ( 181) AT1G21140 | Symbols: | nodulin, putative | chr1:7404464-7405066 FORWARDweakly similar to ( 125) NO21\_SOYBN Nodulin 21 (N-21) - Glycine max (Soybean)moderately similar to ( 204) loc\_os04g59020 12004.m10780 protein integral membrane protein, expressed seq=cds; coord=2:24387828..24389072:1; parent\_gene=GRMZM2G434557'

'weakly similar to ( 190) IAAS\_ORYSA Alpha-amylase/subtilisin inhibitor precursor (RASI) - Oryza sativa (Rice)weakly similar to ( 190) loc\_os04g44470 12004.m09406 protein alpha-amylase/subtilisin inhibitor, putative, expressed seq=cds; coord=2:26769801..26771736:1; parent\_gene=GRMZM2G474575'

'highly similar to ( 564) loc\_os01g05660 12001.m150482 protein expressed protein seq=cds; coord=3:17580074..17584970:1; parent\_gene=GRMZM2G166064'

'weakly similar to ( 178) AT1G28600 | Symbols: | lipase, putative | chr1:10051604-10053073 REVERSEvery weakly similar to (86.7) EST\_HEVBR Esterase precursor (EC 3.1.1.-) (Early nodule-specific protein homolog) (Latex allergen Hev b 13) - Hevea brasiliensis (Para rubber tree)weakly similar to ( 194) loc\_os01g42730 12001.m10537 protein alpha-L-fucosidase 2 precursor, putative, expressed seq=cds; coord=3:213800866..213804340:-1; parent\_gene=GRMZM2G047129'

'moderately similar to ( 241) AT5G14740 | Symbols: CA2, CA18, BETA CA2 | CA2 (CARBONIC ANHYDRASE 2); carbonate dehydratase/ zinc ion binding | chr5:4758257-4762315 FORWARDmoderately similar to ( 340) CAHC\_HORVU Carbonic anhydrase, chloroplast precursor (EC 4.2.1.1) (Carbonate dehydratase) - Hordeum vulgare (Barley)moderately similar to ( 341) loc\_os01g45274 12001.m150428 protein carbonic anhydrase, chloroplast precursor, putative, expressed seq=cds; coord=3:215431519..215437533:-1; parent\_gene=GRMZM2G348512'

'moderately similar to ( 241) AT5G14740 | Symbols: CA2, CA18, BETA CA2 | CA2 (CARBONIC ANHYDRASE 2); carbonate dehydratase/ zinc ion binding | chr5:4758257-4762315 FORWARDmoderately similar to ( 340) CAHC\_HORVU Carbonic anhydrase, chloroplast precursor (EC 4.2.1.1) (Carbonate dehydratase) - Hordeum vulgare (Barley)moderately similar to ( 341) loc\_os01g45274 12001.m150428 protein carbonic anhydrase, chloroplast precursor, putative, expressed seq=cds; coord=3:215431519..215437533:-1; parent\_gene=GRMZM2G348512'

'moderately similar to ( 201) AT1G70410 | Symbols: ATBCA4, BCA4 | carbonic anhydrase, putative / carbonate dehydratase, putative | chr1:26534167-26537457 REVERSEmoderately similar to ( 275) CAHC\_HORVU Carbonic anhydrase, chloroplast precursor (EC 4.2.1.1) (Carbonate dehydratase) - Hordeum vulgare (Barley)moderately similar to ( 273) loc\_os01g45274 12001.m150428 protein carbonic anhydrase, chloroplast precursor, putative, expressed seq=cds; coord=3:215466579..215468759:-1; parent\_gene=GRMZM2G121878'

'moderately similar to ( 270) AT5G14700 | Symbols: | cinnamoyl-CoA reductase-related | chr5:4740502-4743327 REVERSEvery weakly similar to (82.4) DFRA\_MAIZE Dihydroflavonol-4-reductase (EC 1.1.1.219) (DFR) (Dihydrokaempferol 4-reductase) - Zea mays (Maize)moderately similar to ( 499) loc\_os01g45200 12001.m10725 protein dihydroflavonol-4-reductase, putative, expressed seq=cds; coord=3:215757514..215764384:1; parent\_gene=GRMZM2G029547'

'moderately similar to ( 270) AT5G14700 | Symbols: | cinnamoyl-CoA reductase-related | chr5:4740502-4743327 REVERSEvery weakly similar to (82.4) DFRA\_MAIZE Dihydroflavonol-4-reductase (EC 1.1.1.219) (DFR) (Dihydrokaempferol 4-reductase) - Zea mays (Maize)moderately similar to ( 499) loc\_os01g45200 12001.m10725 protein dihydroflavonol-4-reductase, putative, expressed seq=cds; coord=3:215757514..215764384:1; parent\_gene=GRMZM2G029547'

'highly similar to ( 758) AT3G28860 | Symbols: ATMDR1, ATMDR11, PGP19, MDR11, MDR1, ATPGP19, ABCB19, ATABCB19 | ABCB19; ATPase, coupled to transmembrane movement of substances / auxin efflux transmembrane transporter | chr3:10870287-10877286 REVERSEhighly similar to ( 689) MDR\_ORYSA Putative multidrug resistance protein (P-glycoprotein) - Oryza sativa (Rice)nearly identical (1565) loc\_os08g05710 12008.m04714 protein multidrug resistance protein 12, putative, expressed seq=cds; coord=4:33816544..33821596:-1; parent\_gene=GRMZM2G441722'

'moderately similar to ( 223) AT5G45160 | Symbols: | root hair defective 3 GTP-binding (RHD3) family protein | chr5:18264991-18270035 FORWARDmoderately similar to ( 315) loc\_os12g41170 12012.m07899 protein protein SEY1, putative, expressed seq=cds; coord=4:36216954..36264537:1; parent\_gene=GRMZM2G407913'

'highly similar to ( 790) AT1G73590 | Symbols: PIN1, ATPIN1 | PIN1 (PIN-FORMED 1); transporter | chr1:27659772-27662876 FORWARDnearly identical (1019) PIN1\_ORYSA Auxin efflux carrier component 1 (OsPIN1) (Ethylene insensitive root 1 homolog) - Oryza sativa (Rice)nearly identical (1019) loc\_os02g50960 12002.m33866 protein auxin efflux carrier component 1, putative, expressed seq=cds; coord=5:206727149..206730565:1; parent\_gene=GRMZM2G074267'

'moderately similar to ( 213) AT5G37810 | Symbols: NIP4;1, NLM4 | NIP4;1 (NOD26-LIKE INTRINSIC PROTEIN 4;1); water channel | chr5:15045232-15047807 FORWARDmoderately similar to ( 473) LSI1\_ORYSA Silicon transporter LSI1 (Low silicon protein 1) - Oryza sativa (Rice)moderately similar to ( 473) loc\_os02g51110 12002.m10145 protein aquaporin NIP4.2, putative, expressed seq=cds; coord=5:206922588..206926444:1; parent\_gene=GRMZM2G028325'

'very weakly similar to (90.1) AT1G22490 | Symbols: | basic helix-loop-helix (bHLH) family protein | chr1:7938448-7940489 REVERSEmoderately similar to ( 243) loc\_os02g52190 12002.m10250 protein DNA binding protein, putative, expressed seq=cds; coord=5:208895710..208901046:-1; parent\_gene=GRMZM2G045883'

'moderately similar to ( 219) loc\_os05g45480 12005.m08673 protein arabinogalactan protein, putative, expressed seq=cds; coord=6:159437488..159438613:-1; parent\_gene=GRMZM2G043035'

'highly similar to ( 716) AT1G32900 | Symbols: | starch synthase, putative | chr1:11920582-11923506 REVERSEnearly identical (1076) SSG1\_MAIZE Granule-bound starch synthase 1, chloroplast precursor (EC 2.4.1.242) (Granule-bound starch synthase I) (GBSS-I) - Zea mays (Maize)highly similar to ( 933) loc\_os06g04200 12006.m31969 protein granule-bound starch synthase 1, chloroplast precursor, putative, expressed seq=cds; coord=9:23256308..23260236:-1; parent\_gene=GRMZM2G024993'

'weakly similar to ( 125) AT2G17700 | Symbols: | protein kinase family protein | chr2:7685778-7689278 REVERSEweakly similar to ( 189) loc\_os04g59000 12004.m10778 protein ATP binding protein, putative, expressed seq=cds; coord=10:148978659..148981143:-1; parent\_gene=GRMZM2G104658'

'nearly identical (1507) AT3G19960 | Symbols: ATM1 | ATM1 (ARABIDOPSIS THALIANA MYOSIN 1); motor | chr3:6949787-6956736 FORWARDnearly identical (1802) loc\_os10g34710 12010.m06298 protein myosin-2 heavy chain, non muscle, putative, expressed seq=cds; coord=1:229190070..229205919:-1; parent\_gene=GRMZM2G113202'

'weakly similar to ( 156) loc\_os03g61570 12003.m11038 protein expressed protein seq=cds; coord=1:295768837..295770331:1; parent\_gene=GRMZM2G114775'

'moderately similar to ( 224) AT3G08850 | Symbols: RAPTOR1B, ATRAPTOR1B, RAPTOR1 | RAPTOR1; nucleotide binding / protein binding | chr3:2686978-2694911 REVERSEweakly similar to ( 111) ADO1\_ORYSA Adagio-like protein 1 - Oryza sativa (Rice)moderately similar to ( 417) loc\_os12g01916 12012.m27002 protein bcpLH protein, putative, expressed seq=cds; coord=2:152219219..152236923:1; parent\_gene=GRMZM2G444808'

'highly similar to ( 518) AT3G61880 | Symbols: CYP78A9 | CYP78A9 (CYTOCHROME P450 78A9); monooxygenase/ oxygen binding | chr3:22906114-22907890 REVERSEmoderately similar to ( 495) C78A3\_SOYBN Cytochrome P450 78A3 (EC 1.14.-.-) - Glycine max (Soybean)highly similar to ( 718) loc\_os09g35940 12009.m06545 protein cytochrome P450 78A3, putative, expressed seq=cds; coord=2:195035853..195038235:-1; parent\_gene=GRMZM2G034471'

'highly similar to ( 604) AT5G65700 | Symbols: BAM1 | BAM1 (BARELY ANY MERISTEM 1); ATP binding / kinase/ protein serine/threonine kinase | chr5:26281826-26284945 FORWARDweakly similar to ( 179) RPK1\_IPONI Receptor-like protein kinase precursor (EC 2.7.11.1) - Ipomoea nil (Japanese morning glory) (Pharbitis nil)highly similar to ( 645) loc\_os11g12620 12011.m05454 protein receptor protein kinase CLAVATA1 precursor, putative, expressed seq=cds; coord=4:10216533..10222046:1; parent\_gene=GRMZM2G068398'

'weakly similar to ( 104) AT5G15210 | Symbols: ATHB30, ZFHD3 | ATHB30 (ARABIDOPSIS THALIANA HOMEODOMAIN PROTEIN 30); DNA binding / transcription factor | chr5:4937874-4938689 REVERSEmoderately similar to ( 213) loc\_os02g47770 12002.m09811 protein zinc finger homeodomain protein 1, putative, expressed seq=cds; coord=4:160125950..160128076:-1; parent\_gene=GRMZM2G069365'

'moderately similar to ( 304) AT1G75880 | Symbols: | family II extracellular lipase 1 (EXL1) | chr1:28490564-28492298 FORWARDmoderately similar to ( 248) APG\_BRANA Anther-specific proline-rich protein APG (Protein CEX) (Fragment) - Brassica napus (Rape)moderately similar to ( 499) loc\_os06g24404 12006.m091692 protein anther-specific proline-rich protein APG precursor, putative, expressed seq=cds; coord=7:5037195..5039353:1; parent\_gene=GRMZM2G060866'

'highly similar to ( 695) AT1G30220 | Symbols: ATINT2, INT2 | INT2 (INOSITOL TRANSPORTER 2); carbohydrate transmembrane transporter/ sugar:hydrogen symporter | chr1:10632957-10635439 REVERSEweakly similar to ( 124) STC\_RICCO Sugar carrier protein C - Ricinus communis (Castor bean)highly similar to ( 787) loc\_os07g05640 12007.m05028 protein proton myo-inositol cotransporter, putative, expressed seq=cds; coord=7:5335384..5337829:1; parent\_gene=GRMZM2G142063'



'very weakly similar to (87.8) AT1G09530 | Symbols: PIF3, POC1, PAP3 | PIF3 (PHYTOCHROME INTERACTING FACTOR 3); DNA binding / protein binding / transcription factor/ transcription regulator | chr1:3077216-3079367 FORWARDmoderately similar to ( 259) loc\_os01g18290 12001.m42972 protein basic helix-loop-helix dimerisation region bHLH, putative, expressed seq=cds; coord=8:935667..938714:1; parent\_gene=GRMZM2G387528'

'moderately similar to ( 327) AT2G34480 | Symbols: | 60S ribosomal protein L18A (RPL18aB) | chr2:14532916-14534161 REVERSEmoderately similar to ( 352) RL18A\_ORYSA 60S ribosomal protein L18a - Oryza sativa (Rice)moderately similar to ( 360) loc\_os05g49030 12005.m08974 protein 60S ribosomal protein L18a, putative, expressed seq=cds; coord=8:149220935..149222561:-1; parent\_gene=GRMZM2G126928'

'moderately similar to ( 327) AT2G34480 | Symbols: | 60S ribosomal protein L18A (RPL18aB) | chr2:14532916-14534161 REVERSEmoderately similar to ( 352) RL18A\_ORYSA 60S ribosomal protein L18a - Oryza sativa (Rice)moderately similar to ( 360) loc\_os05g49030 12005.m08974 protein 60S ribosomal protein L18a, putative, expressed seq=cds; coord=8:149220935..149222561:-1; parent\_gene=GRMZM2G126928'

'moderately similar to ( 320) AT2G26670 | Symbols: ATHO1, HO1, TED4, GUN2, HY6 | TED4 (REVERSAL OF THE DET PHENOTYPE 4); heme oxygenase (decyclizing) | chr2:11341816-11343394 FORWARDmoderately similar to ( 393) loc\_os06g40080 12006.m08545 protein heme oxygenase 1, putative, expressed seq=cds; coord=9:88918347..88927536:-1; parent\_gene=GRMZM2G101004'

'moderately similar to ( 374) AT1G24360 | Symbols: | 3-oxoacyl-(acyl-carrier protein) reductase, chloroplast / 3-ketoacyl-acyl carrier protein reductase | chr1:8640820-8643283 FORWARDmoderately similar to ( 397) FABG3\_BRANA 3-oxoacyl-[acyl-carrier-protein] reductase 3, chloroplast precursor (EC 1.1.1.100) (3-ketoacyl-acyl carrier protein reductase 3) - Brassica napus (Rape)moderately similar to ( 476) loc\_os04g30760 12004.m08180 protein 3-oxoacyl-reductase, chloroplast precursor, putative, expressed seq=cds; coord=10:108122298..108130104:1; parent\_gene=GRMZM2G099696'

'highly similar to ( 714) AT2G26250 | Symbols: FDH, KCS10 | KCS10 (3-KETOACYL-COA SYNTHASE 10); acyltransferase/ catalytic/ transferase, transferring acyl groups other than amino-acyl groups | chr2:11170799-11173059 REVERSEhighly similar to ( 929) loc\_os03g08360 12003.m35563 protein fiddlehead-like protein, putative, expressed seq=cds; coord=1:16822675..16826498:1; parent\_gene=GRMZM2G445602'

'very weakly similar to (81.6) AT1G72360 | Symbols: | ethylene-responsive element-binding protein, putative | chr1:27241904-27242777 FORWARDvery weakly similar to (83.2) ERF1\_ORYSA Ethylene-responsive transcription factor 1 (Ethylene-responsive element-binding factor 1) (EREBP-1) (OsEREBP1) - Oryza sativa (Rice)weakly similar to ( 144) loc\_os03g08500 12003.m06358 protein ethylene-responsive element binding protein 2, putative, expressed seq=cds; coord=1:17526391..17527311:-1; parent\_gene=AC206951.3\_FG017'

'moderately similar to ( 384) AT3G11180 | Symbols: | oxidoreductase, 2OG-Fe(II) oxygenase family protein | chr3:3504249-3506688 FORWARDmoderately similar to ( 204) LDOX\_MALDO Leucoanthocyanidin dioxygenase (EC 1.14.11.19) (LDOX) (Leucocyanidin oxygenase) (Leucoanthocyanidin hydroxylase) (Anthocyanidin synthase) - Malus domestica (Apple) (Malus sylvestris)highly similar to ( 520) loc\_os03g18030 12003.m101308 protein leucoanthocyanidin dioxygenase, putative, expressed seq=cds; coord=1:44955003..44960551:-1; parent\_gene=AC212219.3\_FG005'

'weakly similar to ( 198) AT2G38440 | Symbols: ITB1, SCAR2, DIS3, WAVE4, ATSCAR2 | SCAR2 (SCAR HOMOLOG 2) | chr2:16095550-16100851 FORWARDweakly similar to ( 192) SCRL1\_ORYSA SCAR-like protein 1 - Oryza sativa (Rice)highly similar to ( 598) loc\_os03g18710 12003.m07292 protein expressed protein seq=cds; coord=1:46576198..46582130:-1; parent\_gene=GRMZM2G104534'  
'weakly similar to ( 124) loc\_os03g22270 12003.m78861 protein auxin-repressed protein, putative, expressed seq=cds; coord=1:57296569..57299181:-1; parent\_gene=GRMZM2G073755'

'moderately similar to ( 432) AT3G07270 | Symbols: | GTP cyclohydrolase I | chr3:2314005-2317059 FORWARDhighly similar to ( 603) loc\_os04g56710 12004.m10558 protein GTP cyclohydrolase I 1, putative, expressed seq=cds; coord=2:3541475..3547749:1; parent\_gene=GRMZM2G062420'

'moderately similar to ( 432) AT3G07270 | Symbols: | GTP cyclohydrolase I | chr3:2314005-2317059 FORWARDhighly similar to ( 603) loc\_os04g56710 12004.m10558 protein GTP cyclohydrolase I 1, putative, expressed seq=cds; coord=2:3541475..3547749:1; parent\_gene=GRMZM2G062420'

'moderately similar to ( 404) AT2G18890 | Symbols: | protein kinase family protein | chr2:8184027-8185673 FORWARDweakly similar to ( 195) NORX\_MEDTR Nodulation receptor kinase precursor (EC 2.7.11.1) (Does not make infections protein 2) (Symbiosis receptor-like kinase) (MtSYMRK) - Medicago truncatula (Barrel medic)highly similar to ( 572) loc\_os04g56060 12004.m10497 protein BRASSINOSTEROID INSENSITIVE 1-associated receptor kinase 1 precursor, putative, expressed seq=cds; coord=2:4670163..4677087:1; parent\_gene=GRMZM2G086577'

'moderately similar to ( 321) AT2G43590 | Symbols: | chitinase, putative | chr2:18081592-18082749 REVERSEhighly similar to ( 515) CHIA\_MAIZE Endochitinase A precursor (EC 3.2.1.14) (Seed chitinase A) - Zea mays (Maize)moderately similar to ( 377) loc\_os04g41680 12004.m09144 protein endochitinase A precursor, putative, expressed seq=cds; coord=2:33534101..33535449:1; parent\_gene=GRMZM2G051943'

'weakly similar to ( 119) AT1G70760 | Symbols: CRR23 | CRR23 ((chlororespiratory reduction 23) | chr1:26687267-26688201 FORWARDweakly similar to ( 198) loc\_os05g28090 12005.m07096 protein expressed protein seq=cds; coord=2:180163167..180166298:-1; parent\_gene=GRMZM2G176129'

'moderately similar to ( 283) AT1G54100 | Symbols: ALDH7B4 | ALDH7B4 (Aldehyde Dehydrogenase 7B4); 3-chloroallyl aldehyde dehydrogenase/ oxidoreductase | chr1:20195435-20198853 REVERSEmoderately similar to ( 292) AL7A1\_MALDO Aldehyde dehydrogenase family 7 member A1 (EC 1.2.1.3) (Antiquitin-1) (Matured fruit 60 kDa protein) (MF-60) - Malus domestica (Apple) (Malus sylvestris)moderately similar to ( 346) loc\_os09g26880 12009.m22098 protein aldehyde dehydrogenase family 7 member A1, putative, expressed seq=cds; coord=2:184131308..184138715:-1; parent\_gene=GRMZM2G130440'

'moderately similar to ( 275) AT1G28600 | Symbols: | lipase, putative | chr1:10051604-10053073 REVERSEweakly similar to ( 151) EST\_HEVBR Esterase precursor (EC 3.1.1.-) (Early nodule-specific protein homolog) (Latex allergen Hev b 13) - Hevea brasiliensis (Para rubber tree)highly similar to ( 561) loc\_os01g11620 12001.m07778 protein esterase precursor, putative, expressed seq=cds; coord=3:3430959..3432894:-1; parent\_gene=GRMZM2G400929'

'nearly identical (1013) AT1G53140 | Symbols: | dynamin family protein | chr1:19799271-19802441 FORWARDnearly identical (1394) loc\_os01g54420 12001.m11606 protein ATP binding protein, putative, expressed seq=cds; coord=3:197386891..197392522:-1; parent\_gene=GRMZM2G010306'

'moderately similar to ( 215) AT4G30550 | Symbols: | glutamine amidotransferase class-I domain-containing protein | chr4:14925618-14926713 FORWARDmoderately similar to ( 302) loc\_os02g08270 12002.m06173 protein defense-related protein, putative, expressed seq=cds; coord=4:234873379..234874456:-1; parent\_gene=GRMZM2G062716'

'moderately similar to ( 258) AT2G28950 | Symbols: ATEXPA6, ATEXP6, ATHEXP ALPHA 1.8 | ATEXPA6 (ARABIDOPSIS THALIANA EXPANSIN A6) | chr2:12431840-12433482 REVERSEmoderately similar to ( 293) EXPA7\_ORYSA Expansin-A7 precursor (OsEXPA7) (Alpha-expansin-7) (OsEXP7) (OsaEXPa1.26) - Oryza sativa (Rice)moderately similar to ( 293) loc\_os03g60720 12003.m10961 protein alpha-expansin 6 precursor, putative, expressed seq=cds; coord=5:2274980..2275954:1; parent\_gene=GRMZM2G445169'

'moderately similar to ( 366) AT3G46450 | Symbols: | SEC14 cytosolic factor family protein / phosphoglyceride transfer family protein | chr3:17093297-17095319 REVERSEhighly similar to ( 694) loc\_os03g60610 12003.m101547 protein CRAL/TRIO domain containing protein, expressed seq=cds; coord=5:2350263..2356801:1; parent\_gene=GRMZM2G003108'

'weakly similar to ( 177) AT5G59890 | Symbols: ADF4, ATADF4 | ADF4 (ACTIN DEPOLYMERIZING FACTOR 4); actin binding | chr5:24123107-24123596 FORWARDmoderately similar to ( 275) ADF3\_MAIZE Actin-depolymerizing factor 3 (ADF 3) (ZmABP3) (ZmADF3) - Zea mays (Maize)moderately similar to ( 223) loc\_os03g60590 12003.m101135 protein actin-depolymerizing factor 3, putative, expressed seq=cds; coord=5:2362323..2364777:-1; parent\_gene=GRMZM2G002825'

'moderately similar to ( 456) AT5G10080 | Symbols: | aspartyl protease family protein | chr5:3150843-3153380 FORWARDvery weakly similar to (85.9) ASP1\_ORYSA Aspartic proteinase Asp1 precursor (EC 3.4.23.-) (OsAsp1) (OSAP1) (Nucellin-like protein) - Oryza sativa (Rice)highly similar to ( 796) loc\_os02g51540 12002.m10187 protein pepsin A, putative, expressed seq=cds; coord=5:208060721..208065128:1; parent\_gene=GRMZM2G335978'

'weakly similar to ( 102) AT1G26310 | Symbols: CAL, CAL1, agl10 | CAL (CAULIFLOWER); DNA binding / transcription factor | chr1:9100330-9103510 REVERSEweakly similar to ( 127) MAD30\_ORYSA MADS-box transcription factor 30 (OsMADS30) - Oryza sativa (Rice)weakly similar to ( 127) loc\_os06g45650 12006.m09093 protein MADS-box transcription factor 30, putative, expressed seq=cds; coord=6:93493646..93495861:-1; parent\_gene=GRMZM2G161666'

'highly similar to ( 555) AT1G68530 | Symbols: CUT1, POP1, CER6, G2, KCS6 | KCS6 (3-KETOACYL-COA SYNTHASE 6); catalytic/ transferase, transferring acyl groups other than amino-acyl groups | chr1:25713600-25714733 REVERSEhighly similar to ( 794) loc\_os06g14810 12006.m06196 protein 3-ketoacyl-CoA synthase, putative, expressed seq=cds; coord=6:117452361..117454400:1; parent\_gene=GRMZM2G168304'

'moderately similar to ( 222) AT1G62300 | Symbols: WRKY6, ATWRKY6 | WRKY6; transcription factor | chr1:23016887-23019155 REVERSEmoderately similar to ( 380) loc\_os05g49210 12005.m08991 protein OsWRKY43 - Superfamily of rice TFs having WRKY and zinc finger domains, expressed seq=cds; coord=6:165021433..165023895:1; parent\_gene=GRMZM2G366795'

'moderately similar to ( 280) AT4G14770 | Symbols: TCX2, ATTCX2 | TCX2 (TESMIN/TSO1-LIKE CXC 2); transcription factor | chr4:8481522-8484825 REVERSEhighly similar to ( 861) loc\_os07g07974 12007.m05257 protein TSO1, putative, expressed seq=cds; coord=7:9327103..9332339:1; parent\_gene=GRMZM2G153754'

'highly similar to ( 583) AT4G30110 | Symbols: HMA2 | HMA2; cadmium-transporting ATPase | chr4:14720253-14724577 REVERSEvery weakly similar to (87.8) PMA4\_NICPL Plasma membrane ATPase 4 (EC 3.6.3.6) (Proton pump 4) - Nicotiana plumbaginifolia (Leadwort-leaved tobacco)highly similar to ( 774) loc\_os07g12900 12007.m05742 protein cadmium/zinc-transporting ATPase 2, putative seq=cds; coord=7:21633432..21636570:1; parent\_gene=AC205008.4\_FG002'

'weakly similar to ( 183) AT2G20570 | Symbols: GPR11, GLK1 | GPR11 (GBF'S PRO-RICH REGION-INTERACTING FACTOR 1); transcription factor/ transcription regulator | chr2:8855486-8857522 FORWARDmoderately similar to ( 384) loc\_os06g24070 12006.m31875 protein transcription factor ZmGLK1, putative, expressed seq=cds; coord=9:2711408..2713807:-1; parent\_gene=GRMZM2G026833'

moderately similar to ( 384) AT5G65140 | Symbols: | trehalose-6-phosphate phosphatase, putative | chr5:26020411-26022077 REVERSEmoderately similar to ( 486) loc\_os06g11840 12006.m05901 protein expressed protein seq=cds; coord=9:5654343..5657317:-1; parent\_gene=GRMZM2G080354'

'weakly similar to ( 183) AT1G12410 | Symbols: CLPR2, NCLPP2, CLP2 | CLP2 (CLP PROTEASE PROTEOLYTIC SUBUNIT 2); serine-type endopeptidase | chr1:4223099-4224954 FORWARDvery weakly similar to (87.4) CLPP\_CHLVU ATP-dependent Clp protease proteolytic subunit (EC 3.4.21.92) (Endopeptidase Clp) - Chlorella vulgaris (Green alga)moderately similar to ( 265) loc\_os06g04530 12006.m05183 protein ATP-dependent Clp protease proteolytic subunit 2, putative, expressed seq=cds; coord=9:22055173..22056303:-1; parent\_gene=GRMZM2G148106'

'moderately similar to ( 325) AT1G08320 | Symbols: | bZIP family transcription factor | chr1:2622113-2627451 REVERSEmoderately similar to ( 303) TGA21\_TOBAC TGACG-sequence-specific DNA-binding protein TGA-2.1 (TGA2.1) - Nicotiana tabacum (Common tobacco)moderately similar to ( 409) loc\_os12g05680 12012.m04561 protein transcription factor HBP-1b, putative, expressed seq=cds; coord=10:5530500..5533143:-1; parent\_gene=GRMZM2G366264'

'moderately similar to ( 338) AT2G31450 | Symbols: ATNTH1 | endonuclease-related | chr2:13401318-13404134 REVERSEmoderately similar to ( 475) loc\_os11g16580 12011.m05743 protein endonuclease III-like protein 1, putative, expressed seq=cds; coord=10:5730941..5734533:1; parent\_gene=GRMZM2G113228'

'moderately similar to ( 291) AT3G03440 | Symbols: | armadillo/beta-catenin repeat family protein | chr3:815709-818568 FORWARDmoderately similar to ( 412) loc\_os01g02200 12001.m06862 protein ubiquitin-protein ligase, putative, expressed seq=cds; coord=3:28221287..28223015:1; parent\_gene=AC183315.4\_FG006'

'very weakly similar to ( 100) AT5G59720 | Symbols: HSP18.2 | HSP18.2 (heat shock protein 18.2) | chr5:24062632-24063117 FORWARDweakly similar to ( 103) HSP11\_PEA 18.1 kDa class I heat shock protein (HSP 18.1) - Pisum sativum (Garden pea)weakly similar to ( 155) loc\_os02g03570 12002.m05707 protein 18.3 kDa class I heat shock protein, putative, expressed seq=cds; coord=4:238985398..238986190:1; parent\_gene=GRMZM2G324956'

'very weakly similar to (94.4) AT1G78860 | Symbols: | curculin-like (mannose-binding) lectin family protein | chr1:29646168-29647499 REVERSEvery weakly similar to (89.7) EP1G\_DAUCA Epidermis-specific secreted glycoprotein EP1 precursor (52/54 kDa medium protein) - Daucus carota (Carrot)highly similar to ( 540) loc\_os01g72810 12001.m13314 protein secreted glycoprotein, putative, expressed seq=cds; coord=8:157452514..157453996:-1; parent\_gene=GRMZM2G059299'

'highly similar to ( 806) AT5G64220 | Symbols: | calmodulin-binding protein | chr5:25686434-25691903 FORWARDnearly identical (1520) loc\_os03g09100 12003.m06416 protein calmodulin-binding transcription activator 2, putative, expressed seq=cds; coord=1:19789491..19814550:-1; parent\_gene=GRMZM2G447551'

'highly similar to ( 806) AT5G64220 | Symbols: | calmodulin-binding protein | chr5:25686434-25691903 FORWARDnearly identical (1520) loc\_os03g09100 12003.m06416 protein calmodulin-binding transcription activator 2, putative, expressed seq=cds; coord=1:19789491..19814550:-1; parent\_gene=GRMZM2G447551'

'weakly similar to ( 182) AT2G28490 | Symbols: | cupin family protein | chr2:12178812-12180983 REVERSEmoderately similar to ( 454) loc\_os03g21790 12003.m07583 protein cupin family protein, expressed seq=cds; coord=1:56160677..56162858:-1; parent\_gene=GRMZM2G054916'



weakly similar to ( 138) AT2G32990 | Symbols: AtGH9B8 | AtGH9B8 (Arabidopsis thaliana glycosyl hydrolase 9B8); catalytic/ hydrolase, hydrolyzing O-glycosyl compounds | chr2:14003361-14005844 FORWARDweakly similar to ( 154) GUN22\_ORYSA Endoglucanase 22 precursor (EC 3.2.1.4) (Endo-1,4-beta glucanase 22) (OsGLU11) - Oryza sativa (Rice)weakly similar to ( 154) loc\_os09g23084 12009.m05465 protein endoglucanase 1 precursor, putative, expressed seq=cds; coord=2:178811871..178813335:-1; parent\_gene=GRMZM2G703265'

'highly similar to ( 822) AT1G15460 | Symbols: ATBOR4, BOR4 | BOR4 (REQUIRES HIGH BORON 4); anion exchanger | chr1:5310196-5313376 REVERSEearly identical (1013) loc\_os01g08020 12001.m07427 protein boron transporter-like protein 2, putative, expressed seq=cds; coord=3:10934126..10940345:-1; parent\_gene=GRMZM2G051753'

'weakly similar to ( 178) AT2G01430 | Symbols: ATHB17, ATHB-17 | ATHB17 (ARABIDOPSIS THALIANA HOMEBOX-LEUCINE ZIPPER PROTEIN 17); transcription factor | chr2:187798-190369 REVERSEmoderately similar to ( 291) loc\_os01g45570 12001.m10759 protein homeobox-leucine zipper protein ATHB-4, putative, expressed seq=cds; coord=3:214857327..214861719:1; parent\_gene=GRMZM2G126239'  
'moderately similar to ( 490) AT1G53300 | Symbols: TTL1 | TTL1 (TETRATRICOPETIDE-REPEAT THIOREDOXIN LIKE 1); binding | chr1:19879726-19882375 FORWARDhighly similar to ( 828) loc\_os01g42960 12001.m10559 protein electron transporter, putative, expressed seq=cds; coord=3:225545980..225550303:1; parent\_gene=GRMZM2G093436'

'very weakly similar to (99.0) AT4G16780 | Symbols: ATHB-2, HAT4, ATHB2 | ATHB-2 (ARABIDOPSIS THALIANA HOMEBOX PROTEIN 2); DNA binding / protein homodimerization/ sequence-specific DNA binding / transcription factor | chr4:9449291-9450604 FORWARDweakly similar to ( 129) loc\_os02g05640 12002.m05912 protein homeobox-leucine zipper protein ATHB-4, putative seq=cds; coord=4:237502428..237504286:-1; parent\_gene=GRMZM2G166041'

moderately similar to ( 366) AT3G46450 | Symbols: SEC14 cytosolic factor family protein / phosphoglyceride transfer family protein | chr3:17093297-17095319 REVERSEhighly similar to ( 694) loc\_os03g60610 12003.m101547 protein CRAL/TRIO domain containing protein, expressed seq=cds; coord=5:2350263..2356801:1; parent\_gene=GRMZM2G003108'

'moderately similar to ( 366) AT3G46450 | Symbols: SEC14 cytosolic factor family protein / phosphoglyceride transfer family protein | chr3:17093297-17095319 REVERSEhighly similar to ( 694) loc\_os03g60610 12003.m101547 protein CRAL/TRIO domain containing protein, expressed seq=cds; coord=5:2350263..2356801:1; parent\_gene=GRMZM2G003108'

'highly similar to ( 962) AT1G66150 | Symbols: TMK1 | TMK1 (TRANSMEMBRANE KINASE 1); transmembrane receptor protein serine/threonine kinase | chr1:24631503-24634415 FORWARDmoderately similar to ( 209) CRI4\_MAIZE Putative receptor protein kinase CRINKLY4 precursor (EC 2.7.11.1) - Zea mays (Maize)nearly identical (1318) loc\_os03g50810 12003.m10067 protein receptor protein kinase TMK1 precursor, putative, expressed seq=cds; coord=5:10414656..10418698:1; parent\_gene=GRMZM2G158359'

'weakly similar to ( 120) AT1G31320 | Symbols: LBD4 | LBD4 (LOB DOMAIN-CONTAINING PROTEIN 4) | chr1:11213107-11214032 FORWARDweakly similar to ( 180) loc\_os03g45750 12003.m09600 protein LOB domain protein 12, putative, expressed seq=cds; coord=5:15187010..15189734:-1; parent\_gene=GRMZM2G079185'

'nearly identical (1060) AT5G35750 | Symbols: AHK2 | AHK2 (ARABIDOPSIS HISTIDINE KINASE 2); cytokinin receptor/ osmosensor/ protein histidine kinase | chr5:13911743-13916337 REVERSEweakly similar to ( 154) ETR1\_BRAOL Ethylene receptor (EC 2.7.13.3) - Brassica oleracea (Wild cabbage)nearly identical (1503) loc\_os10g21810 12010.m65482 protein histidine kinase 3, putative, expressed seq=cds; coord=5:38752228..38809303:1; parent\_gene=GRMZM2G158252'

'weakly similar to ( 122) AT3G09980 | Symbols: | unknown protein | chr3:3069358-3071145 FORWARDmoderately similar to ( 202) loc\_os02g32650 12002.m33393 protein expressed protein seq=cds; coord=5:168449383..168450781:-1; parent\_gene=GRMZM2G045188'

'weakly similar to ( 144) AT5G62940 | Symbols: | Dof-type zinc finger domain-containing protein | chr5:25257183-25258504 REVERSEweakly similar to ( 119) PBF\_MAIZE Dof zinc finger protein PBF (Prolamin box-binding factor) - Zea mays (Maize)moderately similar to ( 360) loc\_os02g47810 12002.m09815 protein dof domain, zinc finger family protein, expressed seq=cds; coord=5:201381499..201385596:-1; parent\_gene=GRMZM2G140694'

'very weakly similar to (98.2) loc\_os02g48140 12002.m100336 protein 17.4 kDa class I heat shock protein 3, putative, expressed seq=cds; coord=5:202095278..202096275:1; parent\_gene=GRMZM2G481605'

highly similar to ( 953) AT2G18700 | Symbols: ATTPS11, TPS11, ATTPSB | ATTPS11; transferase, transferring glycosyl groups | chr2:8109043-8111799 FORWARDnearly identical (1372) loc\_os02g54820 12002.m33906 protein trehalose-6-phosphate synthase, putative, expressed seq=cds; coord=5:213055055..213058997:1; parent\_gene=GRMZM2G122231'

'moderately similar to ( 377) AT1G71980 | Symbols: | protease-associated zinc finger (C3HC4-type RING finger) family protein | chr1:27098250-27099881 FORWARDhighly similar to ( 561) loc\_os03g07130 12003.m101101 protein RING finger protein 13, putative, expressed seq=cds; coord=6:1334626..1338778:1; parent\_gene=GRMZM2G423956'

moderately similar to ( 451) AT1G32450 | Symbols: NRT1.5 | NRT1.5 (NITRATE TRANSPORTER 1.5); nitrate transmembrane transporter/ transporter | chr1:11715337-11719807 REVERSEmoderately similar to ( 434) loc\_os02g46460 12002.m09683 protein peptide transporter PTR2, putative, expressed seq=cds; coord=7:25089776..25092351:-1; parent\_gene=GRMZM2G156794'

'moderately similar to ( 214) AT3G04030 | Symbols: | myb family transcription factor | chr3:1042920-1044574  
REVERSEmoderately similar to ( 284) loc\_os07g48596 12007.m09071 protein MYR1, putative, expressed seq=cds;  
coord=7:173817875..173820052:-1; parent\_gene=AC155434.2\_FG005'

'moderately similar to ( 214) AT3G04030 | Symbols: | myb family transcription factor | chr3:1042920-1044574  
REVERSEmoderately similar to ( 284) loc\_os07g48596 12007.m09071 protein MYR1, putative, expressed seq=cds;  
coord=7:173817875..173820052:-1; parent\_gene=AC155434.2\_FG005'

'highly similar to ( 971) AT5G56040 | Symbols: | leucine-rich repeat protein kinase, putative | chr5:22695050-  
22698410 FORWARDmoderately similar to ( 420) RPK1\_IPONI Receptor-like protein kinase precursor (EC 2.7.11.1) ·  
Ipomoea nil (Japanese morning glory) (Pharbitis nil)nearly identical (1647) loc\_os01g07560 12001.m07382 protein  
receptor-like protein kinase precursor, putative, expressed seq=cds; coord=8:17058192..17062569:1;  
parent\_gene=GRMZM2G463493'

'moderately similar to ( 435) AT3G24460 | Symbols: | TMS membrane family protein / tumour differentially expressed  
(TDE) family protein | chr3:8886160-8889717 REVERSEhighly similar to ( 586) loc\_os01g08460 12001.m07471  
protein TMS membrane protein/tumour differentially expressed protein containing protein, expressed seq=cds;  
coord=8:18892547..18898086:-1; parent\_gene=GRMZM2G088356'

'moderately similar to ( 356) AT1G05800 | Symbols: DGL | DGL (DONGLE); triacylglycerol lipase | chr1:1741204-  
1742619 FORWARDmoderately similar to ( 436) loc\_os01g67430 12001.m12847 protein triacylglycerol lipase,  
putative, expressed seq=cds; coord=8:163911970..163913352:-1; parent\_gene=AC233916.1\_FG002'

'weakly similar to ( 183) AT2G20570 | Symbols: GPR11, GLK1 | GPR11 (GBF'S PRO-RICH REGION-  
INTERACTING FACTOR 1); transcription factor/ transcription regulator | chr2:8855486-8857522  
FORWARDmoderately similar to ( 384) loc\_os06g24070 12006.m31875 protein transcription factor ZmGLK1,  
putative, expressed seq=cds; coord=9:2711408..2713807:-1; parent\_gene=GRMZM2G026833'

'very weakly similar to (86.7) AT5G64080 | Symbols: | protease inhibitor/seed storage/lipid transfer protein (LTP) family protein | chr5:25645475-25646638 REVERSEweakly similar to ( 140) loc\_os03g09230 12003.m35062 protein xylogen protein 1, putative, expressed seq=cds; coord=9:149245864..149247159:1; parent\_gene=GRMZM2G004466'

'moderately similar to ( 216) AT3G19090 | Symbols: | RNA-binding protein, putative | chr3:6601466-6603709 FORWARDmoderately similar to ( 393) loc\_os03g36900 12003.m08805 protein RNA binding protein, putative, expressed seq=cds; coord=1:221945123..221947755:1; parent\_gene=GRMZM2G411041'

'weakly similar to ( 107) AT3G50410 | Symbols: OBP1 | OBP1 (OBF BINDING PROTEIN 1); DNA binding / protein binding / transcription factor | chr3:18709872-18710633 FORWARDweakly similar to ( 144) MNB1A\_MAIZE Dof zinc finger protein MNB1A - Zea mays (Maize)moderately similar to ( 215) loc\_os09g29960 12009.m06147 protein dof zinc finger protein MNB1A, putative, expressed seq=cds; coord=2:188526058..188527888:-1; parent\_gene=GRMZM2G009406'

'weakly similar to ( 179) AT4G18260 | Symbols: | cytochrome B561-related | chr4:10093524-10097337  
REVERSEmoderately similar to ( 261) loc\_os05g49040 12005.m27467 protein expressed protein seq=cds;  
coord=3:210748854..210750807:1; parent\_gene=GRMZM2G024448'

moderately similar to ( 245) AT5G14740 | Symbols: CA2, CA18, BETA CA2 | CA2 (CARBONIC ANHYDRASE 2);  
carbonate dehydratase/ zinc ion binding | chr5:4758257-4762315 FORWARDmoderately similar to ( 340)  
CAHC\_HORVU Carbonic anhydrase, chloroplast precursor (EC 4.2.1.1) (Carbonate dehydratase) - Hordeum vulgare  
(Barley)moderately similar to ( 340) loc\_os01g45274 12001.m150428 protein carbonic anhydrase, chloroplast  
precursor, putative, expressed seq=cds; coord=3:215469087..215473931:-1; parent\_gene=GRMZM2G121878'

'weakly similar to ( 125) AT5G53040 | Symbols: | RWP-RK domain-containing protein | chr5:21506967-21507948  
REVERSEmoderately similar to ( 218) loc\_os01g37100 12001.m10005 protein RWP-RK domain containing protein,  
expressed seq=cds; coord=3:226822416..226824199:-1; parent\_gene=GRMZM2G071322'

'highly similar to ( 568) AT3G22880 | Symbols: ATDMC1, DMC1, ARLIM15 | DMC1 (DISRUPTION OF MEIOTIC  
CONTROL 1); ATP binding / DNA binding / DNA-dependent ATPase/ damaged DNA binding / nucleoside-  
triphosphatase/ nucleotide binding / protein binding | chr3:8097948-8100740 REVERSEhighly similar to ( 606)  
DMC1\_LILLO Meiotic recombination protein DMC1 homolog - Lilium longiflorum (Trumpet lily)highly similar to ( 654)  
loc\_os11g04954 12011.m079904 protein meiotic recombination protein DMC1, putative, expressed seq=cds;  
coord=3:229673847..229678762:-1; parent\_gene=GRMZM2G109618'

'weakly similar to ( 140) AT5G60340 | Symbols: | maoC-like dehydratase domain-containing protein | chr5:24273879-  
24275891 REVERSEweakly similar to ( 189) loc\_os05g09370 12005.m27729 protein carbohydrate kinase, PfkB,  
putative, expressed seq=cds; coord=5:2184671..2186446:-1; parent\_gene=GRMZM2G085320'

'weakly similar to ( 140) AT5G60340 | Symbols: | maoC-like dehydratase domain-containing protein | chr5:24273879-24275891 REVERSEweakly similar to ( 189) loc\_os05g09370 12005.m27729 protein carbohydrate kinase, PfkB, putative, expressed seq=cds; coord=5:2184671..2186446:-1; parent\_gene=GRMZM2G085320'

'very weakly similar to (95.5) AT4G37780 | Symbols: MYB87, ATMYB87 | MYB87 (MYB DOMAIN PROTEIN 87); DNA binding / transcription factor | chr4:17758404-17759526 REVERSEvery weakly similar to (84.3) MYB2\_PHYPA Myb-related protein Pp2 - Physcomitrella patens (Moss)weakly similar to ( 132) loc\_os10g35660 12010.m06386 protein P-type R2R3 Myb protein, putative seq=cds; coord=5:24542797..24544221:1; parent\_gene=GRMZM2G392823'

'moderately similar to ( 240) AT4G33905 | Symbols: | peroxisomal membrane protein 22 kDa, putative | chr4:16254065-16255592 REVERSEmoderately similar to ( 341) loc\_os12g32330 12012.m07038 protein mpv17 / PMP22 family protein, expressed seq=cds; coord=6:22666535..22670670:-1; parent\_gene=GRMZM2G166537'

'moderately similar to ( 370) AT4G39770 | Symbols: | trehalose-6-phosphate phosphatase, putative | chr4:18449138-18451218 REVERSEmoderately similar to ( 459) loc\_os09g20390 12009.m22232 protein expressed protein seq=cds; coord=7:100324179..100326266:-1; parent\_gene=GRMZM2G174396'

'moderately similar to ( 377) AT2G36870 | Symbols: | xyloglucan:xyloglucosyl transferase, putative / xyloglucan endotransglycosylase, putative / endo-xyloglucan transferase, putative | chr2:15472869-15474630 REVERSEmoderately similar to ( 218) XTH\_TOBAC Probable xyloglucan endotransglucosylase/hydrolase protein precursor (EC 2.4.1.207) - Nicotiana tabacum (Common tobacco)highly similar to ( 537) loc\_os07g29750 12007.m07246 protein xyloglucan endotransglucosylase/hydrolase protein 32 precursor, putative, expressed seq=cds; coord=7:148463792..148465550:1; parent\_gene=GRMZM2G413044'

'moderately similar to ( 278) AT5G06730 | Symbols: | peroxidase, putative | chr5:2080207-2081621 REVERSEmoderately similar to ( 276) PER2\_CUCSA Peroxidase 2 (EC 1.11.1.7) (CUP2) (Fragment) - Cucumis sativus (Cucumber)moderately similar to ( 358) loc\_os03g13180 12003.m06764 protein peroxidase 54 precursor, putative, expressed seq=cds; coord=8:102488133..102490149:1; parent\_gene=GRMZM2G117365'

'moderately similar to ( 414) AT1G11680 | Symbols: CYP51G1, EMB1738, CYP51A2, CYP51 | CYP51G1 (CYTOCHROME P450 51G1); oxygen binding / sterol 14-demethylase | chr1:3938925-3940585 FORWARDmoderately similar to ( 421) CP51\_SORBI Cytochrome P450 51 (EC 1.14.13.70) (CYPLI) (P450-LIA1) (Obtusifolii 14-alpha demethylase) - Sorghum bicolor (Sorghum) (Sorghum vulgare)moderately similar to ( 477) loc\_os05g34380 12005.m07669 protein cytochrome P450 51, putative seq=cds; coord=8:104279166..104281118:-1; parent\_gene=GRMZM2G096029'

'moderately similar to ( 248) AT3G07880 | Symbols: | Rho GDP-dissociation inhibitor family protein | chr3:2514175-2515544 FORWARDmoderately similar to ( 348) loc\_os01g68540 12001.m12957 protein rho GDP-dissociation inhibitor 1, putative, expressed seq=cds; coord=8:110181330..110183162:-1; parent\_gene=GRMZM2G072089'

'nearly identical (1043) AT4G28650 | Symbols: | leucine-rich repeat transmembrane protein kinase, putative | chr4:14144155-14147276 REVERSEmoderately similar to ( 407) RPK1\_IPONI Receptor-like protein kinase precursor (EC 2.7.11.1) - Ipomoea nil (Japanese morning glory) (Pharbitis nil)nearly identical (1607) loc\_os03g05140 12003.m06038 protein receptor-like protein kinase 5 precursor, putative, expressed seq=cds; coord=9:152256777..152260287:-1; parent\_gene=GRMZM2G438840'

'weakly similar to ( 189) AT1G25550 | Symbols: | myb family transcription factor | chr1:8976644-8977942 FORWARDmoderately similar to ( 290) loc\_os02g22020 12002.m07440 protein DNA binding protein, putative, expressed seq=cds; coord=10:5384582..5386647:1; parent\_gene=GRMZM2G016370'

'moderately similar to ( 280) AT1G13080 | Symbols: CYP71B2 | CYP71B2 (CYTOCHROME P450 71B2); electron carrier/ heme binding / iron ion binding / monooxygenase/ oxygen binding | chr1:4459493-4460807 FORWARDmoderately similar to ( 432) C71C2\_MAIZE Cytochrome P450 71C2 (EC 1.14.-.-) (Benzoxazineless 3) - Zea mays (Maize)moderately similar to ( 452) loc\_os08g01510 12008.m04299 protein cytochrome P450 71C4, putative, expressed seq=cds; coord=10:108117921..108119785:1; parent\_gene=GRMZM2G399530'

'moderately similar to ( 394) AT4G23180 | Symbols: CRK10, RLK4 | CRK10 (CYSTEINE-RICH RLK10); ATP binding / kinase/ protein kinase/ protein serine/threonine kinase/ protein tyrosine kinase | chr4:12138171-12140780 FORWARDmoderately similar to ( 203) PSKR\_DAUCA Phytosulfokine receptor precursor (EC 2.7.11.1) (Phytosulfokine LRR receptor kinase) - Daucus carota (Carrot)highly similar to ( 523) loc\_os04g53994 12004.m10292 protein ATP binding protein, putative, expressed seq=cds; coord=10:144138641..144143208:-1; parent\_gene=GRMZM2G000633'



'weakly similar to ( 101) AT5G67190 | Symbols: | AP2 domain-containing transcription factor, putative | chr5:26809135-26809689 REVERSEweakly similar to ( 168) loc\_os04g55520 12004.m10443 protein dehydration responsive element binding protein, putative, expressed seq=cds; coord=2:5562976..5564647:1; parent\_gene=GRMZM2G174917'

'moderately similar to ( 248) AT1G01180 | Symbols: | unknown protein | chr1:75633-77446 FORWARDmoderately similar to ( 397) loc\_os09g34320 12009.m06481 protein expressed protein seq=cds; coord=2:193842347..193843862:-1; parent\_gene=GRMZM2G170253'

'moderately similar to ( 248) AT1G01180 | Symbols: | unknown protein | chr1:75633-77446 FORWARDmoderately similar to ( 397) loc\_os09g34320 12009.m06481 protein expressed protein seq=cds; coord=2:193842347..193843862:-1; parent\_gene=GRMZM2G170253'

'moderately similar to ( 260) AT5G14740 | Symbols: CA2, CA18, BETA CA2 | CA2 (CARBONIC ANHYDRASE 2); carbonate dehydratase/ zinc ion binding | chr5:4758257-4762315 FORWARDmoderately similar to ( 338) CAHC\_HORVU Carbonic anhydrase, chloroplast precursor (EC 4.2.1.1) (Carbonate dehydratase) - Hordeum vulgare (Barley)moderately similar to ( 331) loc\_os01g45274 12001.m150428 protein carbonic anhydrase, chloroplast precursor, putative, expressed seq=cds; coord=3:215424737..215427767:-1; parent\_gene=GRMZM2G348512'

'weakly similar to ( 110) loc\_os02g51550 12002.m10188 protein expressed protein seq=cds; coord=4:181258192..181259808:-1; parent\_gene=GRMZM2G016948'

'highly similar to ( 717) AT3G04480 | Symbols: | endoribonuclease | chr3:1193988-1197320 REVERSE seq=cds; coord=5:215011519..215016709:-1; parent\_gene=GRMZM2G150912'

'moderately similar to ( 211) AT1G64940 | Symbols: CYP89A6 | CYP89A6; electron carrier/ heme binding / iron ion binding / monooxygenase/ oxygen binding | chr1:24123789-24125324 FORWARDweakly similar to ( 163) C77A1\_SOLME Cytochrome P450 77A1 (EC 1.14.-.-) (CYPLXXVIIA1) (P-450EG6) (Fragment) - Solanum melongena (Eggplant) (Aubergine)moderately similar to ( 240) loc\_os06g22340 12006.m06888 protein cytochrome P450 89A2, putative, expressed seq=cds; coord=6:3677020..3678837:1; parent\_gene=GRMZM2G104877'

'moderately similar to ( 229) AT3G51280 | Symbols: | male sterility MS5, putative | chr3:19037229-19038781 FORWARDhighly similar to ( 808) loc\_os08g03620 12008.m04506 protein TPR Domain containing protein seq=cds; coord=6:9148014..9152540:-1; parent\_gene=GRMZM2G442170'

'highly similar to ( 775) AT5G04500 | Symbols: | glycosyltransferase family protein 47 | chr5:1283604-1286155 FORWARDnearly identical (1256) loc\_os05g46260 12005.m08751 protein expressed protein seq=cds; coord=6:161715219..161719692:1; parent\_gene=GRMZM2G121237'

'moderately similar to ( 399) AT4G00460 | Symbols: ATROPGEF3, ROPGEF3 | Rho guanyl-nucleotide exchange factor | chr4:211146-213094 REVERSEhighly similar to ( 696) loc\_os07g29780 12007.m07249 protein pollen-specific kinase partner protein, putative, expressed seq=cds; coord=7:148620567..148623468:-1; parent\_gene=GRMZM2G131275'

moderately similar to ( 250) AT3G21800 | Symbols: UGT71B8 | UGT71B8 (UDP-GLUCOSYL TRANSFERASE 71B8); UDP-glycosyltransferase/ quercetin 3-O-glucosyltransferase/ quercetin 4'-O-glucosyltransferase/ transferase, transferring glycosyl groups | chr3:7680243-7681685 REVERSEweakly similar to ( 147) ZOX\_PHAVU Zeatin O-xylosyltransferase (EC 2.4.2.40) (Zeatin O-beta-D-xylosyltransferase) - Phaseolus vulgaris (Kidney bean) (French bean)moderately similar to ( 429) loc\_os07g32010 12007.m07467 protein anthocyanidin 5,3-O-glucosyltransferase, putative, expressed seq=cds; coord=7:151193308..151195193:1; parent\_gene=GRMZM2G455075'

'moderately similar to ( 386) AT2G01630 | Symbols: | glycosyl hydrolase family 17 protein / beta-1,3-glucanase, putative | chr2:279564-281955 REVERSEweakly similar to ( 166) E13B\_WHEAT Glucan endo-1,3-beta-glucosidase precursor (EC 3.2.1.39) ((1->3)-beta-glucan endohydrolase) ((1->3)-beta-glucanase) (Beta-1,3-endoglucanase) - Triticum aestivum (Wheat)highly similar to ( 645) loc\_os07g32600 12007.m28981 protein glucan endo-1,3-beta-glucosidase 3 precursor, putative, expressed seq=cds; coord=7:152391511..152397214:1; parent\_gene=GRMZM2G325008'

'highly similar to ( 830) AT2G41140 | Symbols: CRK1, ATCRK1, ATCBK3 | CRK1 (CDPK-RELATED KINASE 1); calcium ion binding / calcium-dependent protein serine/threonine phosphatase/ calmodulin-dependent protein kinase/ kinase | chr2:17150492-17153378 FORWARDhighly similar to ( 778) CRK\_DAUCA CDPK-related protein kinase (EC 2.7.11.1) (PK421) - Daucus carota (Carrot)highly similar to ( 984) loc\_os07g44710 12007.m08692 protein CDPK-related protein kinase, putative, expressed seq=cds; coord=7:169249410..169255466:-1; parent\_gene=GRMZM2G015703'

'moderately similar to ( 248) AT3G07880 | Symbols: | Rho GDP-dissociation inhibitor family protein | chr3:2514175-2515544 FORWARDmoderately similar to ( 348) loc\_os01g68540 12001.m12957 protein rho GDP-dissociation inhibitor 1, putative, expressed seq=cds; coord=8:110181330..110183162:-1; parent\_gene=GRMZM2G072089'

'moderately similar to ( 284) AT5G10530 | Symbols: | lectin protein kinase, putative | chr5:3324978-3326933  
REVERSEweakly similar to ( 177) NORR\_MEDTR Nodulation receptor kinase precursor (EC 2.7.11.1) (Does not  
make infections protein 2) (Symbiosis receptor-like kinase) (MtSYMCK) - Medicago truncatula (Barrel  
medic)moderately similar to ( 438) loc\_os09g16950 12009.m04955 protein protein kinase, putative, expressed  
seq=cds; coord=10:1915531..1918048:1; parent\_gene=GRMZM2G104655'

'weakly similar to ( 142) AT5G24090 | Symbols: | acidic endochitinase (CHIB1) | chr5:8143805-8145153  
REVERSEmoderately similar to ( 285) XIP1\_ORYSA Xylanase inhibitor protein 1 precursor (Class III chitinase  
homolog a) (RIXI protein) - Oryza sativa (Rice)moderately similar to ( 285) loc\_os11g47580 12011.m08558 protein  
xylanase inhibitor protein 1 precursor, putative, expressed seq=cds; coord=10:1980938..1982242:1;  
parent\_gene=GRMZM2G400999'

'highly similar to ( 761) AT1G11680 | Symbols: CYP51G1, EMB1738, CYP51A2, CYP51 | CYP51G1  
(CYTOCHROME P450 51G1); oxygen binding / sterol 14-demethylase | chr1:3938925-3940585 FORWARDhighly  
similar to ( 911) CP51\_SORBI Cytochrome P450 51 (EC 1.14.13.70) (CYPL1) (P450-LIA1) (Obtusifoliol 14-alpha  
demethylase) - Sorghum bicolor (Sorghum) (Sorghum vulgare)highly similar to ( 862) loc\_os11g32240 12011.m07126  
protein cytochrome P450 51, putative, expressed seq=cds; coord=10:3062645..3066771:-1;  
parent\_gene=GRMZM2G068465'

'highly similar to ( 625) AT5G58330 | Symbols: | malate dehydrogenase (NADP), chloroplast, putative |  
chr5:23580010-23582287 REVERSEhighly similar to ( 791) MDHP\_MAIZE Malate dehydrogenase [NADP],  
chloroplast precursor (EC 1.1.1.82) (NADP-MDH) - Zea mays (Maize)highly similar to ( 697) loc\_os08g44810  
12008.m08453 protein malate dehydrogenase 1, chloroplast precursor, putative, expressed seq=cds;  
coord=1:203170067..203174226:-1; parent\_gene=GRMZM2G129513'

'weakly similar to ( 101) AT5G20630 | Symbols: GLP3, GLP3A, GLP3B, ATGER3, GER3 | GER3 (GERMIN 3);  
oxalate oxidase | chr5:6975315-6975950 REVERSEweakly similar to ( 103) GLP1\_SINAL Germin-like protein 1  
precursor - Sinapis alba (White mustard) (Brassica hirta)weakly similar to ( 114) loc\_os08g35750 12008.m07564  
protein germin-like protein 1 precursor, putative, expressed seq=cds; coord=1:207865153..207865778:-1;  
parent\_gene=GRMZM2G363004'

'highly similar to ( 552) AT2G06050 | Symbols: OPR3 | OPR3 (OPDA-REDUCTASE 3); 12-oxophytodienoate reductase | chr2:2359240-2361971 REVERSEhighly similar to ( 717) loc\_os08g35740 12008.m080177 protein 12-oxophytodienoate reductase 3, putative, expressed seq=cds; coord=1:207901911..207905956:-1; parent\_gene=GRMZM2G148281'

'moderately similar to ( 374) AT4G37590 | Symbols: NPY5 | NPY5 (NAKED PINS IN YUC MUTANTS 5); protein binding / signal transducer | chr4:17663080-17665299 REVERSEmoderately similar to ( 204) NPH3\_ORYSA Coleoptile phototropism protein 1 (Non-phototropic hypocotyl 3-like protein) (NPH3-like protein) - Oryza sativa (Rice)highly similar to ( 552) loc\_os03g41350 12003.m34896 protein transposon protein, putative, Mutator sub-class, expressed seq=cds; coord=1:255150622..255155140:1; parent\_gene=GRMZM2G172506'

'moderately similar to ( 374) AT4G37590 | Symbols: NPY5 | NPY5 (NAKED PINS IN YUC MUTANTS 5); protein binding / signal transducer | chr4:17663080-17665299 REVERSEmoderately similar to ( 204) NPH3\_ORYSA Coleoptile phototropism protein 1 (Non-phototropic hypocotyl 3-like protein) (NPH3-like protein) - Oryza sativa (Rice)highly similar to ( 552) loc\_os03g41350 12003.m34896 protein transposon protein, putative, Mutator sub-class, expressed seq=cds; coord=1:255150622..255155140:1; parent\_gene=GRMZM2G172506'

'highly similar to ( 934) AT2G02220 | Symbols: ATPSKR1, PSKR1 | PSKR1 (PHYTOSULFOKIN RECEPTOR 1); ATP binding / peptide receptor/ protein serine/threonine kinase | chr2:584098-587124 REVERSEhighly similar to ( 910) PSKR\_DAUCA Phytosulfokine receptor precursor (EC 2.7.11.1) (Phytosulfokine LRR receptor kinase) - Daucus carota (Carrot)nearly identical (1459) loc\_os04g57630 12004.m10648 protein phytosulfokine receptor precursor, putative, expressed seq=cds; coord=2:2222100..2225911:1; parent\_gene=GRMZM2G452142'

'moderately similar to ( 363) AT3G19130 | Symbols: ATRBP47B | ATRBP47B (RNA-binding protein 47B); RNA binding | chr3:6611398-6613823 REVERSEvery weakly similar to (82.4) ROC1\_NICSY 29 kDa ribonucleoprotein A, chloroplast precursor (CP29A) - Nicotiana sylvestris (Wood tobacco)highly similar to ( 520) loc\_os09g28810 12009.m06032 protein expressed protein seq=cds; coord=2:186893618..186898382:1; parent\_gene=GRMZM2G168163'

'weakly similar to ( 178) AT1G28600 | Symbols: | lipase, putative | chr1:10051604-10053073 REVERSEvery weakly similar to (86.7) EST\_HEVBR Esterase precursor (EC 3.1.1.-) (Early nodule-specific protein homolog) (Latex allergen Hev b 13) - Hevea brasiliensis (Para rubber tree)weakly similar to ( 194) loc\_os01g42730 12001.m10537 protein alpha-L-fucosidase 2 precursor, putative, expressed seq=cds; coord=3:213800866..213804340:-1; parent\_gene=GRMZM2G047129'

'moderately similar to ( 241) AT5G14740 | Symbols: CA2, CA18, BETA CA2 | CA2 (CARBONIC ANHYDRASE 2); carbonate dehydratase/ zinc ion binding | chr5:4758257-4762315 FORWARDmoderately similar to ( 340) CAHC\_HORVU Carbonic anhydrase, chloroplast precursor (EC 4.2.1.1) (Carbonate dehydratase) - Hordeum vulgare (Barley)moderately similar to ( 341) loc\_os01g45274 12001.m150428 protein carbonic anhydrase, chloroplast precursor, putative, expressed seq=cds; coord=3:215431519..215437533:-1; parent\_gene=GRMZM2G348512'

'moderately similar to ( 317) AT1G33440 | Symbols: | proton-dependent oligopeptide transport (POT) family protein | chr1:12127712-12130327 REVERSEmoderately similar to ( 423) loc\_os04g36040 12004.m08693 protein peptide transporter PTR2, putative, expressed seq=cds; coord=4:25983954..25985905:1; parent\_gene=GRMZM2G026459'

'moderately similar to ( 317) AT1G33440 | Symbols: | proton-dependent oligopeptide transport (POT) family protein | chr1:12127712-12130327 REVERSEmoderately similar to ( 423) loc\_os04g36040 12004.m08693 protein peptide transporter PTR2, putative, expressed seq=cds; coord=4:25983954..25985905:1; parent\_gene=GRMZM2G026459'

'moderately similar to ( 329) AT5G10770 | Symbols: | chloroplast nucleoid DNA-binding protein, putative | chr5:3403331-3405331 REVERSEhighly similar to ( 549) loc\_os02g48860 12002.m09920 protein aspartic proteinase nepenthesin-2 precursor, putative, expressed seq=cds; coord=4:163962237..163964018:1; parent\_gene=GRMZM2G141036'

'highly similar to ( 676) AT5G37600 | Symbols: ATGSR1, GLN1;1, GSR 1 | ATGSR1; copper ion binding / glutamate-ammonia ligase | chr5:14933574-14935656 REVERSEhighly similar to ( 733) GLNA3\_MAIZE Glutamine synthetase root isozyme 3 (EC 6.3.1.2) (Glutamate--ammonia ligase) (GS112) - Zea mays (Maize)highly similar to ( 714) loc\_os02g50240 12002.m33860 protein glutamine synthetase root isozyme 3, putative, expressed seq=cds; coord=4:167081372..167084703:-1; parent\_gene=GRMZM2G036464'

'highly similar to ( 618) AT2G30710 | Symbols: | RabGAP/TBC domain-containing protein | chr2:13086147-13088991 REVERSEhighly similar to ( 792) loc\_os09g34040 12009.m06453 protein TBC1 domain family member 22A, putative, expressed seq=cds; coord=4:171362826..171367336:1; parent\_gene=GRMZM2G142806'

'weakly similar to ( 108) AT3G20570 | Symbols: | plastocyanin-like domain-containing protein | chr3:7186754-7187453 REVERSEweakly similar to ( 155) loc\_os02g06670 12002.m06015 protein early nodulin 20 precursor, putative, expressed seq=cds; coord=4:236730981..236732351:-1; parent\_gene=GRMZM2G101916'

'moderately similar to ( 207) AT3G04530 | Symbols: PPCK2, PEPCK2 | PPCK2; kinase/ protein serine/threonine kinase | chr3:1221546-1222456 FORWARDweakly similar to ( 153) CDPK2\_ORYSA Calcium-dependent protein kinase, isoform 2 (EC 2.7.11.1) (CDPK 2) - Oryza sativa (Rice)moderately similar to ( 419) loc\_os02g41580 12002.m09194 protein calcium-dependent protein kinase 2, putative, expressed seq=cds; coord=5:186505821..186507490:1; parent\_gene=GRMZM2G096753'

highly similar to ( 800) AT3G53260 | Symbols: PAL2, ATPAL2 | PAL2; phenylalanine ammonia-lyase | chr3:19744256-19746619 REVERSEhighly similar to ( 966) PAL1\_ORYSA Phenylalanine ammonia-lyase (EC 4.3.1.5) - Oryza sativa (Rice)highly similar to ( 966) loc\_os02g41630 12002.m33418 protein phenylalanine ammonia-lyase, putative, expressed seq=cds; coord=5:186677171..186679442:-1; parent\_gene=GRMZM2G074604'

'weakly similar to ( 147) AT5G07450 | Symbols: CYCP4;3 | CYCP4;3 (cyclin p4;3); cyclin-dependent protein kinase | chr5:2358418-2359253 REVERSEmoderately similar to ( 227) loc\_os02g43550 12002.m09390 protein nuc-1 negative regulatory protein preg, putative, expressed seq=cds; coord=5:195401851..195404340:1; parent\_gene=GRMZM2G160563'

'weakly similar to ( 147) AT1G48590 | Symbols: | C2 domain-containing protein | chr1:17962979-17964274  
FORWARDmoderately similar to ( 244) loc\_os07g31830 12007.m07449 protein GTPase activating protein, putative,  
expressed seq=cds; coord=7:150889841..150897264:1; parent\_gene=GRMZM2G163095'

'moderately similar to ( 402) AT4G17360 | Symbols: | formyltetrahydrofolate deformylase/ hydroxymethyl-, formyl-  
and related transferase/ methyltransferase | chr4:9703698-9705468 REVERSEhighly similar to ( 533) loc\_os03g01222  
12003.m35587 protein formyltetrahydrofolate deformylase, putative, expressed seq=cds;  
coord=9:155451718..155453474:-1; parent\_gene=GRMZM2G168281'

'moderately similar to ( 367) AT2G46860 | Symbols: AtPPa3 | AtPPa3 (Arabidopsis thaliana pyrophosphorylase 3);  
inorganic diphosphatase/ pyrophosphatase | chr2:19253843-19255060 FORWARDmoderately similar to ( 423)  
IPYR\_MAIZE Soluble inorganic pyrophosphatase (EC 3.6.1.1) (Pyrophosphate phospho-hydrolase) (PPase) - Zea  
mays (Maize)moderately similar to ( 409) loc\_os04g59040 12004.m101703 protein soluble inorganic  
pyrophosphatase, putative, expressed seq=cds; coord=10:148996189..148998596:-1;  
parent\_gene=GRMZM2G104918'

'moderately similar to ( 268) AT3G13620 | Symbols: | amino acid permease family protein | chr3:4450904-4452556  
REVERSEmoderately similar to ( 377) loc\_os03g25840 12003.m07929 protein cationic amino acid transporter,  
putative, expressed seq=cds; coord=1:64885893..64889912:-1; parent\_gene=GRMZM2G306919'



'moderately similar to ( 268) AT3G13620 | Symbols: | amino acid permease family protein | chr3:4450904-4452556  
REVERSEmoderately similar to ( 377) loc\_os03g25840 12003.m07929 protein cationic amino acid transporter,  
putative, expressed seq=cds; coord=1:64885893..64889912:-1; parent\_gene=GRMZM2G306919'

'highly similar to ( 612) AT3G54190 | Symbols: | FUNCTIONS IN: molecular\_function unknown; INVOLVED IN:  
biological\_process unknown; EXPRESSED IN: 22 plant structures; EXPRESSED DURING: 13 growth stages;  
CONTAINS InterPro DOMAIN/s: WD40 repeat-like (InterPro:IPR011046); BEST Arabidopsis thaliana protein match  
is: unknown protein (TAIR:AT2G38630.1); Has 77 Blast hits to 77 proteins in 20 species: Archae - 0; Bacteria - 0;  
Metazoa - 0; Fungi - 0; Plants - 51; Viruses - 0; Other Eukaryotes - 26 (source: NCBI BLINK). | chr3:20061759-  
20063880 REVERSEhighly similar to ( 757) loc\_os12g31440 12012.m06953 protein expressed protein seq=cds;  
coord=3:135500443..135510945:1; parent\_gene=GRMZM2G084606'

'weakly similar to ( 162) AT1G61660 | Symbols: | basic helix-loop-helix (bHLH) family protein | chr1:22754603-  
22756171 REVERSEmoderately similar to ( 372) loc\_os01g57580 12001.m11909 protein helix-loop-helix DNA-  
binding domain containing protein, expressed seq=cds; coord=3:190314296..190317061:1;  
parent\_gene=GRMZM2G440529'

'moderately similar to ( 260) AT5G14740 | Symbols: CA2, CA18, BETA CA2 | CA2 (CARBONIC ANHYDRASE 2);  
carbonate dehydratase/ zinc ion binding | chr5:4758257-4762315 FORWARDmoderately similar to ( 338)  
CAHC\_HORVU Carbonic anhydrase, chloroplast precursor (EC 4.2.1.1) (Carbonate dehydratase) - Hordeum vulgare  
(Barley)moderately similar to ( 331) loc\_os01g45274 12001.m150428 protein carbonic anhydrase, chloroplast  
precursor, putative, expressed seq=cds; coord=3:215424737..215427767:-1; parent\_gene=GRMZM2G348512'

'very weakly similar to ( 100) AT3G21330 | Symbols: | basic helix-loop-helix (bHLH) family protein | chr3:7507720-  
7508841 FORWARDvery weakly similar to (80.9) LAX\_ORYSA Transcription factor LAX PANICLE - Oryza sativa  
(Rice)weakly similar to ( 143) loc\_os01g38610 12001.m10144 protein DNA binding protein, putative, expressed  
seq=cds; coord=3:219182141..219184295:-1; parent\_gene=GRMZM2G081816'

moderately similar to ( 260) AT4G28850 | Symbols: | xyloglucan:xyloglucosyl transferase, putative / xyloglucan endotransglycosylase, putative / endo-xyloglucan transferase, putative | chr4:14244336-14245781  
FORWARDmoderately similar to ( 236) BRU1\_SOYBN Brassinosteroid-regulated protein BRU1 precursor - Glycine max (Soybean)moderately similar to ( 421) loc\_os02g17900 12002.m07034 protein xyloglucan endotransglucosylase/hydrolase protein 26 precursor, putative, expressed seq=cds; coord=4:221631043..221632262:-1; parent\_gene=GRMZM2G112619'

weakly similar to ( 119) loc\_os06g44660 12006.m08993 protein fasciclin-like arabinogalactan protein 8 precursor, putative, expressed seq=cds; coord=5:89287541..89288511:1; parent\_gene=GRMZM2G134528'

'highly similar to ( 790) AT1G73590 | Symbols: PIN1, ATPIN1 | PIN1 (PIN-FORMED 1); transporter | chr1:27659772-27662876 FORWARDnearly identical (1019) PIN1\_ORYSA Auxin efflux carrier component 1 (OsPIN1) (Ethylene insensitive root 1 homolog) - Oryza sativa (Rice)nearly identical (1019) loc\_os02g50960 12002.m33866 protein auxin efflux carrier component 1, putative, expressed seq=cds; coord=5:206727149..206730565:1; parent\_gene=GRMZM2G074267'

'very weakly similar to (90.1) AT1G22490 | Symbols: | basic helix-loop-helix (bHLH) family protein | chr1:7938448-7940489 REVERSEmoderately similar to ( 243) loc\_os02g52190 12002.m10250 protein DNA binding protein, putative, expressed seq=cds; coord=5:208895710..208901046:-1; parent\_gene=GRMZM2G045883'

'weakly similar to ( 181) AT2G43190 | Symbols: | ribonuclease P family protein | chr2:17956220-17957833  
FORWARDmoderately similar to ( 438) loc\_os05g39530 12005.m083751 protein ribonuclease P/ ribonuclease, putative, expressed seq=cds; coord=6:74035080..74038340:-1; parent\_gene=GRMZM2G047265'

'weakly similar to ( 110) AT2G34730 | Symbols: | myosin heavy chain-related | chr2:14654611-14657443  
FORWARDhighly similar to ( 712) loc\_os07g05390 12007.m05003 protein expressed protein seq=cds; coord=7:5086583..5093575:-1; parent\_gene=GRMZM2G011800'

'moderately similar to ( 226) AT1G68400 | Symbols: | leucine-rich repeat transmembrane protein kinase, putative | chr1:25646401-25648916 REVERSEweakly similar to ( 136) PSKR\_DAUCA Phytosulfokine receptor precursor (EC 2.7.11.1) (Phytosulfokine LRR receptor kinase) - Daucus carota (Carrot)highly similar to ( 712) loc\_os07g38640 12007.m08109 protein receptor-kinase isolog, 5 partial, putative, expressed seq=cds; coord=7:159907257..159909577:-1; parent\_gene=GRMZM2G006505'

'weakly similar to ( 177) AT5G45540 | Symbols: | unknown protein | chr5:18458294-18460705 REVERSEmoderately similar to ( 385) loc\_os10g11310 12010.m065239 protein expressed protein seq=cds; coord=8:21845748..21848205:1; parent\_gene=GRMZM2G032551'

'highly similar to ( 684) AT3G13390 | Symbols: sks11 | sks11 (SKU5 Similar 11); copper ion binding / oxidoreductase | chr3:4351401-4353289 REVERSEhighly similar to ( 686) NTP3\_TOBAC Pollen-specific protein NTP303 precursor - Nicotiana tabacum (Common tobacco)highly similar to ( 927) loc\_os05g40740 12005.m083761 protein pollen-specific protein NTP303 precursor, putative, expressed seq=cds; coord=8:119369178..119371841:-1; parent\_gene=GRMZM2G142584'

'moderately similar to ( 447) AT2G28680 | Symbols: | cupin family protein | chr2:12303118-12304747 REVERSEvery weakly similar to (97.8) GLUA2\_ORYSA Glutelin type-A 2 precursor (Glutelin type II) [Contains: Glutelin type-A 2 acidic chain; Glutelin type-A 2 basic chain] - Oryza sativa (Rice)highly similar to ( 549) loc\_os05g02520 12005.m27675 protein legumin-like protein, putative, expressed seq=cds; coord=8:133178452..133180059:1; parent\_gene=GRMZM2G005552'

highly similar to ( 619) AT5G64570 | Symbols: XYL4, ATBXL4 | XYL4; hydrolase, hydrolyzing O-glycosyl compounds / xylan 1,4-beta-xylosidase | chr5:25810227-25813309 REVERSEmoderately similar to ( 290) XYNB\_PRUPE Putative beta-D-xylosidase (EC 3.2.1.-) (PpAz152) (Fragment) - Prunus persica (Peach)nearly identical (1204) loc\_os11g47350 12011.m08515 protein beta-D-xylosidase, putative seq=cds; coord=9:101686324..101689087:1; parent\_gene=GRMZM2G146523'

'moderately similar to ( 382) AT1G72370 | Symbols: P40, AP40, RP40, RPSAA | P40; structural constituent of ribosome | chr1:27243148-27244842 REVERSEmoderately similar to ( 406) RSSA\_SOYBN 40S ribosomal protein SA (p40) - Glycine max (Soybean)moderately similar to ( 477) loc\_os03g08440 12003.m35048 protein 40S ribosomal protein SA, putative, expressed seq=cds; coord=1:17325366..17335709:-1; parent\_gene=GRMZM2G145308'

'moderately similar to ( 299) AT2G30020 | Symbols: | protein phosphatase 2C, putative / PP2C, putative | chr2:12814437-12815904 FORWARDmoderately similar to ( 469) loc\_os03g18150 12003.m07240 protein protein phosphatase 2C isoform epsilon, putative, expressed seq=cds; coord=1:45366147..45367585:1; parent\_gene=AC208201.3\_FG002'

moderately similar to ( 236) AT2G45110 | Symbols: ATEXPB4, EXPB4, ATHEXP BETA 1.1 | ATEXPB4 (ARABIDOPSIS THALIANA EXPANSIN B4) | chr2:18599575-18601237 FORWARDmoderately similar to ( 412) EXB12\_ORYSA Expansin-B12 precursor (OsEXPB12) (Beta-expansin-12) (OsaEXPb1.17) - Oryza sativa (Rice)moderately similar to ( 414) loc\_os03g44290 12003.m35332 protein beta-expansin 4 precursor, putative, expressed seq=cds; coord=1:251136916..251138525:1; parent\_gene=GRMZM2G103672'

'moderately similar to ( 461) AT3G02210 | Symbols: COBL1 | COBL1 (COBRA-LIKE PROTEIN 1 PRECURSOR) | chr3:409352-411478 REVERSEhighly similar to ( 597) COBL7\_ORYSA COBRA-like 7 protein precursor (BRITTLE CULM1-like 3 protein) - Oryza sativa (Rice)moderately similar to ( 456) loc\_os05g32110 12005.m083711 protein COBRA-like protein 4 precursor, putative, expressed seq=cds; coord=2:21872675..21874781:-1; parent\_gene=GRMZM2G465188'

'highly similar to ( 716) AT1G62660 | Symbols: | beta-fructosidase (BFRUCT3) / beta-fructofuranosidase / invertase, vacuolar | chr1:23199949-23203515 FORWARDnearly identical (1191) INV1\_MAIZE Beta-fructofuranosidase 1 precursor (EC 3.2.1.26) (Sucrose 1) (Invertase 1) - Zea mays (Maize)highly similar to ( 956) loc\_os04g45290 12004.m35180 protein beta-fructofuranosidase 1 precursor, putative, expressed seq=cds; coord=2:22880766..22885337:-1; parent\_gene=GRMZM2G394450'

'moderately similar to ( 473) AT2G37170 | Symbols: PIP2B, PIP2;2 | PIP2B (PLASMA MEMBRANE INTRINSIC PROTEIN 2); water channel | chr2:15613624-15614791 REVERSEhighly similar to ( 525) PIP23\_ORYSA Probable aquaporin PIP2.3 (Plasma membrane intrinsic protein 2.3) (OsPIP2.3) - Oryza sativa (Rice)highly similar to ( 525) loc\_os04g44060 12004.m09364 protein aquaporin PIP2.3, putative, expressed seq=cds; coord=2:27867805..27870068:-1; parent\_gene=GRMZM2G178693'

highly similar to ( 543) AT1G61820 | Symbols: BGLU46 | BGLU46 (BETA GLUCOSIDASE 46); catalytic/ cation binding / hydrolase, hydrolyzing O-glycosyl compounds | chr1:22836707-22838444 FORWARDmoderately similar to ( 374) BGLC\_MAIZE Beta-glucosidase, chloroplast precursor (EC 3.2.1.21) (Gentiobiase) (Cellobiase) (Beta-D-glucoside glucohydrolase) - Zea mays (Maize)highly similar to ( 647) loc\_os04g43360 12004.m101583 protein beta-glucosidase, chloroplast precursor, putative, expressed seq=cds; coord=2:28861517..28871313:-1; parent\_gene=GRMZM2G012236'

highly similar to ( 543) AT1G61820 | Symbols: BGLU46 | BGLU46 (BETA GLUCOSIDASE 46); catalytic/ cation binding / hydrolase, hydrolyzing O-glycosyl compounds | chr1:22836707-22838444 FORWARDmoderately similar to ( 374) BGLC\_MAIZE Beta-glucosidase, chloroplast precursor (EC 3.2.1.21) (Gentiobiase) (Cellobiase) (Beta-D-glucoside glucohydrolase) - Zea mays (Maize)highly similar to ( 647) loc\_os04g43360 12004.m101583 protein beta-glucosidase, chloroplast precursor, putative, expressed seq=cds; coord=2:28861517..28871313:-1; parent\_gene=GRMZM2G012236'

'moderately similar to ( 401) AT4G23310 | Symbols: | receptor-like protein kinase, putative | chr4:12185737-12188763 FORWARDweakly similar to ( 200) NORK\_MEDTR Nodulation receptor kinase precursor (EC 2.7.11.1) (Does not make infections protein 2) (Symbiosis receptor-like kinase) (MtSYMRK) - Medicago truncatula (Barrel medic)highly similar to ( 692) loc\_os07g35370 12007.m07793 protein receptor-like protein kinase homolog RK20-1, putative, expressed seq=cds; coord=2:204116816..204119629:-1; parent\_gene=GRMZM2G140231'

'moderately similar to ( 298) AT5G45910 | Symbols: | GDSL-motif lipase/hydrolase family protein | chr5:18620420-18622264 REVERSEweakly similar to ( 135) EST\_HEVBR Esterase precursor (EC 3.1.1.-) (Early nodule-specific protein homolog) (Latex allergen Hev b 13) - Hevea brasiliensis (Para rubber tree)highly similar to ( 574) loc\_os01g11650 12001.m42621 protein esterase precursor, putative, expressed seq=cds; coord=3:3209208..3210849:1; parent\_gene=GRMZM2G085176'

'seq=cds; coord=3:17605685..17606666:1; parent\_gene=GRMZM2G099340'

'highly similar to ( 837) AT2G14960 | Symbols: GH3.1 | GH3.1 | chr2:6451659-6453670 REVERSE  
(1033) GH32\_ORYSA Probable indole-3-acetic acid-amido synthetase GH3.2 (EC 6.3.2.-) (Auxin-responsive GH3-like protein 2) (OsGH3-2) - Oryza sativa (Rice) nearly identical (1033) loc\_os01g55940 12001.m11750 protein indole-3-acetic acid-amido synthetase GH3.2, putative, expressed seq=cds; coord=3:194424615..194428239:-1; parent\_gene=GRMZM2G033359'

'highly similar to ( 888) AT1G03750 | Symbols: CHR9 | SWI2 (SWITCH 2); ATP binding / DNA binding / helicase/ nucleic acid binding | chr1:937920-941068 FORWARD  
weakly similar to ( 130) ISW2\_ORYSA Probable chromatin remodelling complex ATPase chain (EC 3.6.1.-) (ISW2-like) (Sucrose nonfermenting protein 2 homolog) - Oryza sativa (Rice) nearly identical (1074) loc\_os05g15890 12005.m27751 protein ATP binding protein, putative, expressed seq=cds; coord=5:21030962..21046194:1; parent\_gene=GRMZM2G146041'

'moderately similar to ( 340) AT1G64530 | Symbols: | RWP-RK domain-containing protein | chr1:23959820-23962896 FORWARD  
moderately similar to ( 424) loc\_os02g04340 12002.m05783 protein NIN-like protein 2, putative, expressed seq=cds; coord=5:76682569..76685854:-1; parent\_gene=GRMZM2G042278'

'highly similar to ( 642) AT3G52600 | Symbols: AtcwINV2 | AtcwINV2 (Arabidopsis thaliana cell wall invertase 2); hydrolase, hydrolyzing O-glycosyl compounds | chr3:19507080-19508833 REVERSEnearly identical (1174) INVA\_MAIZE Beta-fructofuranosidase, cell wall isozyme precursor (EC 3.2.1.26) (Sucrose hydrolase) (Invertase) - Zea mays (Maize)highly similar to ( 927) loc\_os02g33110 12002.m100224 protein beta-fructofuranosidase, insoluble isoenzyme 1 precursor, putative, expressed seq=cds; coord=5:169454598..169459090:1; parent\_gene=GRMZM2G139300'

'weakly similar to ( 167) AT2G01660 | Symbols: PDLP6 | PDLP6 (PLASMODESMATA-LOCATED PROTEIN 6) | chr2:291717-292496 REVERSEmoderately similar to ( 363) loc\_os06g14280 12006.m06143 protein secretory protein-like, putative, expressed seq=cds; coord=6:118147444..118150871:1; parent\_gene=GRMZM2G059634'

'highly similar to ( 583) AT4G30110 | Symbols: HMA2 | HMA2; cadmium-transporting ATPase | chr4:14720253-14724577 REVERSEvery weakly similar to (87.8) PMA4\_NICPL Plasma membrane ATPase 4 (EC 3.6.3.6) (Proton pump 4) - Nicotiana glauca (Leadwort-leaved tobacco)highly similar to ( 774) loc\_os07g12900 12007.m05742 protein cadmium/zinc-transporting ATPase 2, putative seq=cds; coord=7:21633432..21636570:1; parent\_gene=AC205008.4\_FG002'

'nearly identical (1143) AT5G54280 | Symbols: ATM2, ATMYOS1, ATM4 | ATM2 (ARABIDOPSIS THALIANA MYOSIN 2); motor | chr5:22039606-22045592 REVERSEnearly identical (1733) loc\_os07g37560 12007.m28992 protein myosin-5C, putative, expressed seq=cds; coord=7:157571319..157580965:-1; parent\_gene=GRMZM2G057380'

'moderately similar to ( 440) AT1G06520 | Symbols: ATGPAT1, GPAT1 | GPAT1 (GLYCEROL-3-PHOSPHATE ACYLTRANSFERASE 1); 1-acylglycerol-3-phosphate O-acyltransferase/ acyltransferase | chr1:1994170-1996067 REVERSEhighly similar to ( 758) loc\_os01g44069 12001.m10665 protein glycerol-3-phosphate acyltransferase 1, putative, expressed seq=cds; coord=8:145960909..145968749:1; parent\_gene=GRMZM2G177150'

'moderately similar to ( 427) AT5G42800 | Symbols: DFR, TT3, M318 | DFR (DIHYDROFLAVONOL 4-REDUCTASE); dihydrokaempferol 4-reductase | chr5:17164296-17165864 REVERSEhighly similar to ( 574) DFRA\_MAIZE Dihydroflavonol-4-reductase (EC 1.1.1.219) (DFR) (Dihydrokaempferol 4-reductase) - Zea mays (Maize)moderately similar to ( 392) loc\_os01g44260 12001.m10683 protein dihydroflavonol-4-reductase, putative, expressed seq=cds; coord=8:146110828..146112451:1; parent\_gene=GRMZM2G013726'

'moderately similar to ( 389) AT4G09160 | Symbols: | SEC14 cytosolic factor family protein / phosphoglyceride transfer family protein | chr4:5839761-5842158 FORWARDhighly similar to ( 623) loc\_os01g65380 12001.m12651 protein patellin-5, putative, expressed seq=cds; coord=8:165856036..165859140:-1; parent\_gene=GRMZM2G033649'

'moderately similar to ( 389) AT4G09160 | Symbols: | SEC14 cytosolic factor family protein / phosphoglyceride transfer family protein | chr4:5839761-5842158 FORWARDhighly similar to ( 623) loc\_os01g65380 12001.m12651 protein patellin-5, putative, expressed seq=cds; coord=8:165856036..165859140:-1; parent\_gene=GRMZM2G033649'

'moderately similar to ( 283) AT4G17650 | Symbols: | aromatic-rich family protein | chr4:9827749-9829443 FORWARDmoderately similar to ( 368) loc\_os01g56560 12001.m11813 protein protein COQ10 A, mitochondrial precursor, putative, expressed seq=cds; coord=8:172486699..172489943:1; parent\_gene=GRMZM2G111472'

'highly similar to ( 704) AT3G12360 | Symbols: ITN1 | ITN1 (INCREASED TOLERANCE TO NA<sub>2</sub>CO<sub>3</sub>); protein binding | chr3:3934146-3936495 FORWARDhighly similar to ( 951) loc\_os03g17240 12003.m07154 protein protein binding protein, putative, expressed seq=cds; coord=9:138798239..138801359:-1; parent\_gene=GRMZM2G020982'

'highly similar to ( 704) AT3G12360 | Symbols: ITN1 | ITN1 (INCREASED TOLERANCE TO NA<sub>2</sub>CO<sub>3</sub>); protein binding | chr3:3934146-3936495 FORWARDhighly similar to ( 951) loc\_os03g17240 12003.m07154 protein protein binding protein, putative, expressed seq=cds; coord=9:138798239..138801359:-1; parent\_gene=GRMZM2G020982'



'moderately similar to ( 325) AT1G08320 | Symbols: | bZIP family transcription factor | chr1:2622113-2627451  
REVERSEmoderately similar to ( 303) TGA21\_TOBAC TGACG-sequence-specific DNA-binding protein TGA-2.1  
(TGA2.1) - Nicotiana tabacum (Common tobacco)moderately similar to ( 409) loc\_os12g05680 12012.m04561  
protein transcription factor HBP-1b, putative, expressed seq=cds; coord=10:5530500..5533143:-1;  
parent\_gene=GRMZM2G366264'

'nearly identical (1538) AT4G30190 | Symbols: AHA2, PMA2 | AHA2; ATPase/ hydrogen-exporting ATPase,  
phosphorylative mechanism | chr4:14770820-14775920 REVERSEnearly identical (1693) PMA1\_ORYSA Plasma  
membrane ATPase (EC 3.6.3.6) (Proton pump) - Oryza sativa (Rice)nearly identical (1693) loc\_os04g56160  
12004.m101441 protein plasma membrane ATPase, putative, expressed seq=cds; coord=10:146179978..146186537:1;  
parent\_gene=GRMZM2G006894'

'weakly similar to ( 152) AT3G59650 | Symbols: | mitochondrial ribosomal protein L51/S25/CI-B8 family protein |  
chr3:22033216-22033928 FORWARDweakly similar to ( 182) loc\_os03g10930 12003.m06545 protein mitochondrial  
ribosomal protein L43, putative, expressed seq=cds; coord=1:21456899..21461749:1;  
parent\_gene=GRMZM2G004259'

'weakly similar to ( 175) AT2G33385 | Symbols: arpc2b | arpc2b (actin-related protein C2B); structural molecule |  
chr2:14147604-14149769 REVERSEmoderately similar to ( 350) loc\_os04g43290 12004.m101581 protein ARPC2B,  
putative, expressed seq=cds; coord=2:28671052..28673189:-1; parent\_gene=GRMZM2G052644'

'weakly similar to ( 175) AT2G33385 | Symbols: arpc2b | arpc2b (actin-related protein C2B); structural molecule |  
chr2:14147604-14149769 REVERSEmoderately similar to ( 350) loc\_os04g43290 12004.m101581 protein ARPC2B,  
putative, expressed seq=cds; coord=2:28671052..28673189:-1; parent\_gene=GRMZM2G052644'

'moderately similar to ( 304) AT5G15240 | Symbols: | amino acid transporter family protein | chr5:4947762-4950211  
FORWARDhighly similar to ( 542) loc\_os01g41420 12001.m10409 protein amino acid permease, putative, expressed  
seq=cds; coord=3:222949367..222951117:-1; parent\_gene=GRMZM2G066428'

'very weakly similar to (91.7) AT1G19210 | Symbols: | AP2 domain-containing transcription factor, putative |  
chr1:6626973-6627530 REVERSEweakly similar to ( 199) loc\_os02g54050 12002.m10434 protein transcriptional  
factor TINY, putative, expressed seq=cds; coord=4:176528249..176529362:1; parent\_gene=GRMZM2G097081'

'weakly similar to ( 158) AT1G05385 | Symbols: | photosystem II 11 kDa protein-related | chr1:1582747-1583648  
REVERSEmoderately similar to ( 206) loc\_os03g53640 12003.m10335 protein expressed protein seq=cds;  
coord=5:7442570..7443838:1; parent\_gene=GRMZM2G087435'

'moderately similar to ( 375) AT3G22750 | Symbols: | protein kinase, putative | chr3:8037364-8039096  
REVERSEhighly similar to ( 538) loc\_os03g53410 12003.m10311 protein ATMRK1, putative, expressed seq=cds;  
coord=5:7587329..7589198:-1; parent\_gene=GRMZM2G014618'

'highly similar to ( 597) AT2G32990 | Symbols: AtGH9B8 | AtGH9B8 (Arabidopsis thaliana glycosyl hydrolase 9B8);  
catalytic/ hydrolase, hydrolyzing O-glycosyl compounds | chr2:14003361-14005844 FORWARDhighly similar to ( 760)  
GUN5\_ORYSA Endoglucanase 5 precursor (EC 3.2.1.4) (Endo-1,4-beta glucanase 5) - Oryza sativa (Rice)highly  
similar to ( 760) loc\_os02g05744 12002.m05922 protein endoglucanase 1 precursor, putative, expressed seq=cds;  
coord=5:80803727..80807409:-1; parent\_gene=GRMZM2G482256'

'weakly similar to ( 157) AT4G15760 | Symbols: MO1 | MO1 (MONOOXYGENASE 1); electron carrier/ oxidoreductase | chr4:8972785-8974548 REVERSEmoderately similar to ( 220) loc\_os02g35320 12002.m08620 protein oxidoreductase, putative, expressed seq=cds; coord=5:174126967..174128883:-1; parent\_gene=GRMZM2G339523'

'highly similar to ( 606) AT2G32990 | Symbols: AtGH9B8 | AtGH9B8 (Arabidopsis thaliana glycosyl hydrolase 9B8); catalytic/ hydrolase, hydrolyzing O-glycosyl compounds | chr2:14003361-14005844 FORWARDhighly similar to ( 809) GUN7\_ORYSA Endoglucanase 7 precursor (EC 3.2.1.4) (Endo-1,4-beta glucanase 7) (OsGLU10) - Oryza sativa (Rice)highly similar to ( 809) loc\_os02g50490 12002.m10083 protein endoglucanase 1 precursor, putative, expressed seq=cds; coord=5:205562436..205565933:1; parent\_gene=GRMZM2G151257'

'moderately similar to ( 273) AT5G10770 | Symbols: | chloroplast nucleoid DNA-binding protein, putative | chr5:3403331-3405331 REVERSEmoderately similar to ( 481) loc\_os06g20140 12006.m06671 protein aspartic proteinase nepenthesin-I precursor, putative seq=cds; coord=6:120916323..120918370:-1; parent\_gene=GRMZM2G405498'

'highly similar to ( 572) AT3G17470 | Symbols: ATCRSH | RelA/SpoT domain-containing protein / calcium-binding EF-hand family protein | chr3:5979868-5981968 FORWARDhighly similar to ( 816) loc\_os05g06890 12005.m05216 protein relA-SpoT like protein RSH4, putative, expressed seq=cds; coord=6:125187387..125190276:-1; parent\_gene=GRMZM2G152040'

'highly similar to ( 560) AT3G06430 | Symbols: EMB2750 | EMB2750 (embryo defective 2750) | chr3:1956658-1958240 REVERSEweakly similar to ( 128) RF1\_ORYSA Rf1 protein, mitochondrial precursor (PPR protein) (Fertility restorer) (Restorer for CMS) - Oryza sativa (Rice)highly similar to ( 701) loc\_os03g19650 12003.m35185 protein PPR2, putative, expressed seq=cds; coord=7:2581533..2584327:-1; parent\_gene=GRMZM2G341621'

'moderately similar to ( 301) AT5G57480 | Symbols: | AAA-type ATPase family protein | chr5:23279406-23280968 REVERSEhighly similar to ( 660) loc\_os09g27340 12009.m05886 protein ATP binding protein, putative seq=cds; coord=7:122985316..122987123:1; parent\_gene=GRMZM2G095254'

'weakly similar to ( 187) AT1G44760 | Symbols: | universal stress protein (USP) family protein | chr1:16896894-16898427 REVERSEmoderately similar to ( 248) loc\_os01g65440 12001.m12655 protein universal stress protein family protein, expressed seq=cds; coord=8:165713440..165715862:-1; parent\_gene=GRMZM2G114057'

'weakly similar to ( 187) AT1G44760 | Symbols: | universal stress protein (USP) family protein | chr1:16896894-16898427 REVERSEmoderately similar to ( 248) loc\_os01g65440 12001.m12655 protein universal stress protein family protein, expressed seq=cds; coord=8:165713440..165715862:-1; parent\_gene=GRMZM2G114057'

'weakly similar to ( 187) AT1G44760 | Symbols: | universal stress protein (USP) family protein | chr1:16896894-16898427 REVERSEmoderately similar to ( 248) loc\_os01g65440 12001.m12655 protein universal stress protein family protein, expressed seq=cds; coord=8:165713440..165715862:-1; parent\_gene=GRMZM2G114057'

'weakly similar to ( 130) loc\_os01g55570 12001.m43202 protein thylakoid membrane phosphoprotein 14 kda, chloroplast precursor, putative, expressed seq=cds; coord=8:173408069..173410516:-1; parent\_gene=GRMZM2G302639'

'weakly similar to ( 130) loc\_os01g55570 12001.m43202 protein thylakoid membrane phosphoprotein 14 kda, chloroplast precursor, putative, expressed seq=cds; coord=8:173408069..173410516:-1; parent\_gene=GRMZM2G302639'

'moderately similar to ( 233) AT3G15510 | Symbols: ATNAC2, ANAC056, NARS1 | ATNAC2 (ARABIDOPSIS NAC DOMAIN CONTAINING PROTEIN 2); transcription factor | chr3:5243696-5245037 FORWARDmoderately similar to ( 223) NAC68\_ORYSA NAC domain-containing protein 68 (ONAC068) - Oryza sativa (Rice)moderately similar to ( 286) loc\_os11g03300 12011.m04526 protein NAC domain transcription factor, putative, expressed seq=cds; coord=10:2679313..2681402:-1; parent\_gene=GRMZM2G127379'

'weakly similar to ( 135) AT5G45420 | Symbols: | myb family transcription factor | chr5:18405668-18406597 REVERSEmoderately similar to ( 235) loc\_os08g06240 12008.m04763 protein dnajc2 protein, putative, expressed seq=cds; coord=10:77673604..77678581:-1; parent\_gene=GRMZM2G001530'

'weakly similar to ( 194) AT4G33420 | Symbols: | peroxidase, putative | chr4:16084856-16086105 FORWARDweakly similar to ( 170) PER1\_ARAHY Cationic peroxidase 1 precursor (EC 1.11.1.7) (PNPC1) - Arachis hypogaea (Peanut)highly similar to ( 504) loc\_os05g04380 12005.m27687 protein peroxidase 1 precursor, putative, expressed seq=cds; coord=10:85640717..85645627:1; parent\_gene=GRMZM2G394500'

'weakly similar to ( 172) loc\_os12g03440 12012.m04342 protein F-box domain containing protein, expressed seq=cds; coord=1:172875290..172877007:-1; parent\_gene=GRMZM2G087608'

'moderately similar to ( 478) AT4G12320 | Symbols: CYP706A6 | CYP706A6; electron carrier/ heme binding / iron ion binding / monooxygenase/ oxygen binding | chr4:7314939-7316647 REVERSEmoderately similar to ( 308) C75A2\_SOLME Flavonoid 3',5'-hydroxylase (EC 1.14.13.88) (F3'5'H) (Cytochrome P450 75A2) (CYPLXXVA2) (P-450EG1) - Solanum melongena (Eggplant) (Aubergine)highly similar to ( 709) loc\_os08g43440 12008.m08318 protein flavonoid 3-monooxygenase, putative, expressed seq=cds; coord=1:207274164..207276641:1; parent\_gene=GRMZM2G089528'

'moderately similar to ( 323) AT1G26870 | Symbols: FEZ, ANAC009 | FEZ (FEZ); transcription factor | chr1:9312856-9314983 FORWARDweakly similar to ( 187) NAC68\_ORYSA NAC domain-containing protein 68 (ONAC068) - Oryza sativa (Rice)highly similar to ( 518) loc\_os08g33910 12008.m07381 protein NAC domain-containing protein 9, putative, expressed seq=cds; coord=1:212951664..212953388:-1; parent\_gene=GRMZM2G152543'

'weakly similar to ( 108) AT5G46080 | Symbols: | protein kinase family protein | chr5:18689723-18690721 REVERSEmoderately similar to ( 315) loc\_os08g28890 12008.m06894 protein ATP binding protein, putative, expressed seq=cds; coord=1:219974839..219976008:-1; parent\_gene=GRMZM2G154114'

'moderately similar to ( 216) AT3G19090 | Symbols: | RNA-binding protein, putative | chr3:6601466-6603709 FORWARDmoderately similar to ( 393) loc\_os03g36900 12003.m08805 protein RNA binding protein, putative, expressed seq=cds; coord=1:221945123..221947755:1; parent\_gene=GRMZM2G411041'

'highly similar to ( 934) AT2G02220 | Symbols: ATPSKR1, PSKR1 | PSKR1 (PHYTOSULFOKIN RECEPTOR 1); ATP binding / peptide receptor/ protein serine/threonine kinase | chr2:584098-587124 REVERSEhighly similar to ( 910) PSKR\_DAUCA Phytosulfokine receptor precursor (EC 2.7.11.1) (Phytosulfokine LRR receptor kinase) - Daucus carota (Carrot)nearly identical (1459) loc\_os04g57630 12004.m10648 protein phytosulfokine receptor precursor, putative, expressed seq=cds; coord=2:2222100..2225911:1; parent\_gene=GRMZM2G452142'

'highly similar to ( 934) AT2G02220 | Symbols: ATPSKR1, PSKR1 | PSKR1 (PHYTOSULFOKIN RECEPTOR 1); ATP binding / peptide receptor/ protein serine/threonine kinase | chr2:584098-587124 REVERSEhighly similar to ( 910) PSKR\_DAUCA Phytosulfokine receptor precursor (EC 2.7.11.1) (Phytosulfokine LRR receptor kinase) - Daucus carota (Carrot)nearly identical (1459) loc\_os04g57630 12004.m10648 protein phytosulfokine receptor precursor, putative, expressed seq=cds; coord=2:2222100..2225911:1; parent\_gene=GRMZM2G452142'

'highly similar to ( 537) AT5G23810 | Symbols: AAP7 | AAP7; amino acid transmembrane transporter | chr5:8028461-8030138 FORWARDhighly similar to ( 704) loc\_os04g39489 12004.m35579 protein AAP7, putative, expressed seq=cds; coord=2:39327335..39330173:1; parent\_gene=GRMZM2G155491'

'weakly similar to ( 119) loc\_os09g31300 12009.m22140 protein helix-loop-helix DNA-binding domain containing protein, expressed seq=cds; coord=2:189701055..189703654:1; parent\_gene=GRMZM2G417597'

'weakly similar to ( 178) AT1G28600 | Symbols: | lipase, putative | chr1:10051604-10053073 REVERSEvery weakly similar to (86.7) EST\_HEVBR Esterase precursor (EC 3.1.1.-) (Early nodule-specific protein homolog) (Latex allergen Hev b 13) - Hevea brasiliensis (Para rubber tree)weakly similar to ( 194) loc\_os01g42730 12001.m10537 protein alpha-L-fucosidase 2 precursor, putative, expressed seq=cds; coord=3:213800866..213804340:-1; parent\_gene=GRMZM2G047129'

'nearly identical (1232) AT1G77760 | Symbols: NIA1, GNR1, NR1 | NIA1 (NITRATE REDUCTASE 1); nitrate reductase | chr1:29236005-29239367 REVERSEnearly identical (1540) NIA7\_HORVU Nitrate reductase [NAD(P)H] (EC 1.7.1.2) - Hordeum vulgare (Barley)nearly identical (1573) loc\_os02g53130 12002.m10342 protein nitrate reductase, putative, expressed seq=cds; coord=4:177655913..177659763:1; parent\_gene=GRMZM2G428027'

'weakly similar to ( 129) AT2G43760 | Symbols: | molybdopterin biosynthesis MoaE family protein | chr2:18133276-18133872 FORWARDweakly similar to ( 188) loc\_os02g04740 12002.m05822 protein molybdenum cofactor synthesis protein 2 large subunit, putative, expressed seq=cds; coord=4:237711634..237712667:-1; parent\_gene=GRMZM2G165966'

'moderately similar to ( 330) AT2G20840 | Symbols: | secretory carrier membrane protein (SCAMP) family protein | chr2:8971925-8974400 REVERSEmoderately similar to ( 418) loc\_os03g38600 12003.m08954 protein SCAMP37, putative seq=cds; coord=5:19709117..19712463:-1; parent\_gene=GRMZM2G124938'

'weakly similar to ( 132) AT1G78080 | Symbols: RAP2.4 | RAP2.4 (related to AP2 4); DNA binding / transcription factor | chr1:29364790-29365794 FORWARDmoderately similar to ( 202) loc\_os02g51670 12002.m10198 protein AP2 domain-containing protein, putative, expressed seq=cds; coord=5:208162767..208165707:1; parent\_gene=GRMZM2G055204'

'moderately similar to ( 407) AT4G39770 | Symbols: | trehalose-6-phosphate phosphatase, putative | chr4:18449138-18451218 REVERSEhighly similar to ( 521) loc\_os02g51680 12002.m10199 protein expressed protein seq=cds; coord=5:208172385..208174899:1; parent\_gene=GRMZM2G055150'

'highly similar to ( 675) AT5G08560 | Symbols: | transducin family protein / WD-40 repeat family protein | chr5:2771104-2773827 REVERSEhighly similar to ( 986) loc\_os02g19210 12002.m07164 protein WD-repeat protein 26, putative, expressed seq=cds; coord=6:8380046..8400603:1; parent\_gene=GRMZM2G061186'

'moderately similar to ( 350) AT5G55590 | Symbols: QRT1 | QRT1 (QUARTET 1); pectinesterase | chr5:22519911-22521699 FORWARDweakly similar to ( 169) PME3\_CITSI Pectinesterase-3 precursor (EC 3.1.1.11) (Pectin methylesterase 3) (PE 3) - Citrus sinensis (Sweet orange)highly similar to ( 565) loc\_os07g41650 12007.m08401 protein pectinesterase VGDH2 precursor, putative, expressed seq=cds; coord=7:164829922..164833174:-1; parent\_gene=GRMZM2G037411'

'moderately similar to ( 253) AT3G13840 | Symbols: | scarecrow transcription factor family protein | chr3:4555305-4556837 REVERSEmoderately similar to ( 261) NSP1\_MEDTR Nodulation signaling pathway 1 protein - Medicago truncatula (Barrel medic)moderately similar to ( 457) loc\_os03g29480 12003.m08221 protein nodulation signaling pathway 1 protein, putative, expressed seq=cds; coord=7:165156675..165158312:1; parent\_gene=GRMZM2G169636'

'moderately similar to ( 253) AT3G13840 | Symbols: | scarecrow transcription factor family protein | chr3:4555305-4556837 REVERSEmoderately similar to ( 261) NSP1\_MEDTR Nodulation signaling pathway 1 protein - Medicago truncatula (Barrel medic)moderately similar to ( 457) loc\_os03g29480 12003.m08221 protein nodulation signaling pathway 1 protein, putative, expressed seq=cds; coord=7:165156675..165158312:1; parent\_gene=GRMZM2G169636'

'moderately similar to ( 460) AT3G05620 | Symbols: | pectinesterase family protein | chr3:1629658-1631766 REVERSEmoderately similar to ( 426) PME\_PRUPE Pectinesterase PPE8B precursor (EC 3.1.1.11) (Pectin methylesterase) (PE) - Prunus persica (Peach)highly similar to ( 779) loc\_os01g15039 12001.m08104 protein pectinesterase PPE8B precursor, putative, expressed seq=cds; coord=8:5329655..5332095:1; parent\_gene=GRMZM2G017555'

'moderately similar to ( 249) AT1G70060 | Symbols: SNL4 | SNL4 (SIN3-LIKE 4) | chr1:26383789-26389568 FORWARDmoderately similar to ( 338) loc\_os01g01960 12001.m06838 protein paired amphipathic helix repeat family protein, expressed seq=cds; coord=8:8136058..8139636:-1; parent\_gene=AC234160.1\_FG001'

'moderately similar to ( 414) AT1G11680 | Symbols: CYP51G1, EMB1738, CYP51A2, CYP51 | CYP51G1 (CYTOCHROME P450 51G1); oxygen binding / sterol 14-demethylase | chr1:3938925-3940585 FORWARDmoderately similar to ( 421) CP51\_SORBI Cytochrome P450 51 (EC 1.14.13.70) (CYPLI) (P450-LIA1) (Obtusifoliol 14-alpha demethylase) - Sorghum bicolor (Sorghum) (Sorghum vulgare)moderately similar to ( 477) loc\_os05g34380 12005.m07669 protein cytochrome P450 51, putative seq=cds; coord=8:104279166..104281118:-1; parent\_gene=GRMZM2G096029'

'moderately similar to ( 248) AT3G07880 | Symbols: | Rho GDP-dissociation inhibitor family protein | chr3:2514175-2515544 FORWARDmoderately similar to ( 348) loc\_os01g68540 12001.m12957 protein rho GDP-dissociation inhibitor 1, putative, expressed seq=cds; coord=8:110181330..110183162:-1; parent\_gene=GRMZM2G072089'

'moderately similar to ( 280) AT1G23280 | Symbols: | MAK16 protein-related | chr1:8260865-8262650 REVERSEmoderately similar to ( 362) loc\_os07g16950 12007.m079650 protein MAK16-like protein RBM13, putative, expressed seq=cds; coord=8:161187376..161192709:-1; parent\_gene=GRMZM2G461793'



'weakly similar to ( 197) AT1G65680 | Symbols: ATEXPB2, EXPB2, ATHEXP BETA 1.4 | ATEXPB2 (ARABIDOPSIS THALIANA EXPANSIN B2) | chr1:24427266-24428399 FORWARDmoderately similar to ( 293) EXPB6\_ORYSA Expansin-B6 precursor (OsEXPB6) (Beta-expansin-6) (OsaEXPb1.8) - Oryza sativa (Rice)moderately similar to ( 293) loc\_os10g40700 12010.m06838 protein beta-expansin 1a precursor, putative, expressed seq=cds; coord=9:116679986..116681453:1; parent\_gene=GRMZM2G073260'

'highly similar to ( 714) AT2G26250 | Symbols: FDH, KCS10 | KCS10 (3-KETOACYL-COA SYNTHASE 10); acyltransferase/ catalytic/ transferase, transferring acyl groups other than amino-acyl groups | chr2:11170799-11173059 REVERSEhighly similar to ( 929) loc\_os03g08360 12003.m35563 protein fiddlehead-like protein, putative, expressed seq=cds; coord=1:16822675..16826498:1; parent\_gene=GRMZM2G445602'

'weakly similar to ( 198) AT2G38440 | Symbols: ITB1, SCAR2, DIS3, WAVE4, ATSCAR2 | SCAR2 (SCAR HOMOLOG 2) | chr2:16095550-16100851 FORWARDweakly similar to ( 192) SCRL1\_ORYSA SCAR-like protein 1 - Oryza sativa (Rice)highly similar to ( 598) loc\_os03g18710 12003.m07292 protein expressed protein seq=cds; coord=1:46576198..46582130:-1; parent\_gene=GRMZM2G104534'

'nearly identical (1507) AT3G19960 | Symbols: ATM1 | ATM1 (ARABIDOPSIS THALIANA MYOSIN 1); motor | chr3:6949787-6956736 FORWARDnearly identical (1802) loc\_os10g34710 12010.m06298 protein myosin-2 heavy chain, non muscle, putative, expressed seq=cds; coord=1:229190070..229205919:-1; parent\_gene=GRMZM2G113202'

'highly similar to ( 632) AT4G13420 | Symbols: HAK5, ATHAK5 | HAK5 (HIGH AFFINITY K

'moderately similar to ( 321) AT2G43590 | Symbols: | chitinase, putative | chr2:18081592-18082749 REVERSEhighly similar to ( 515) CHIA\_MAIZE Endochitinase A precursor (EC 3.2.1.14) (Seed chitinase A) - Zea mays (Maize)moderately similar to ( 377) loc\_os04g41680 12004.m09144 protein endochitinase A precursor, putative, expressed seq=cds; coord=2:33534101..33535449:1; parent\_gene=GRMZM2G051943'

'moderately similar to ( 485) AT5G40010 | Symbols: AATP1 | AATP1 (AAA-ATPase 1); ATP binding / ATPase/ nucleoside-triphosphatase/ nucleotide binding | chr5:16020218-16021762 REVERSEhighly similar to ( 649) loc\_os12g44190 12012.m08190 protein ATPase 3, putative, expressed seq=cds; coord=2:34473212..34475281:-1; parent\_gene=GRMZM2G138770'

'highly similar to ( 609) AT2G46370 | Symbols: JAR1, FIN219 | JAR1 (JASMONATE RESISTANT 1); ATP binding / adenylyltransferase/ catalytic/ jasmonate-amino synthetase | chr2:19034579-19036369 FORWARDhighly similar to ( 719) GH312\_ORYSA Probable indole-3-acetic acid-amido synthetase GH3.12 (EC 6.3.2.-) (Auxin-responsive GH3-like protein 12) (OsGH3-12) - Oryza sativa (Rice)highly similar to ( 796) loc\_os01g12160 12001.m07831 protein indole-3-acetic acid-amido synthetase GH3.3, putative, expressed seq=cds; coord=3:2949994..2952747:-1; parent\_gene=GRMZM2G060991'

'moderately similar to ( 275) AT1G28600 | Symbols: | lipase, putative | chr1:10051604-10053073 REVERSEweakly similar to ( 151) EST\_HEVBR Esterase precursor (EC 3.1.1.-) (Early nodule-specific protein homolog) (Latex allergen Hev b 13) - Hevea brasiliensis (Para rubber tree)highly similar to ( 561) loc\_os01g11620 12001.m07778 protein esterase precursor, putative, expressed seq=cds; coord=3:3430959..3432894:-1; parent\_gene=GRMZM2G400929'

'highly similar to ( 822) AT1G15460 | Symbols: ATBOR4, BOR4 | BOR4 (REQUIRES HIGH BORON 4); anion exchanger | chr1:5310196-5313376 REVERSEearly identical (1013) loc\_os01g08020 12001.m07427 protein boron transporter-like protein 2, putative, expressed seq=cds; coord=3:10934126..10940345:-1; parent\_gene=GRMZM2G051753'

'seq=cds; coord=3:17605685..17606666:1; parent\_gene=GRMZM2G099340'

'moderately similar to ( 261) AT1G71860 | Symbols: PTP1, ATPTP1 | PTP1 (PROTEIN TYROSINE PHOSPHATASE 1); protein tyrosine phosphatase | chr1:27026866-27028675 FORWARDmoderately similar to ( 409) loc\_os12g07590 12012.m073780 protein receptor-type tyrosine-protein phosphatase S precursor, putative, expressed seq=cds; coord=3:140409749..140417545:1; parent\_gene=GRMZM2G010775'

'moderately similar to ( 327) AT2G37650 | Symbols: | scarecrow-like transcription factor 9 (SCL9) | chr2:15792623-15794779 FORWARDweakly similar to ( 147) CIGR2\_ORYSA Chitin-inducible gibberellin-responsive protein 2 - Oryza sativa (Rice)highly similar to ( 558) loc\_os11g47900 12011.m08587 protein chitin-inducible gibberellin-responsive protein 2, putative, expressed seq=cds; coord=4:829955..831938:-1; parent\_gene=GRMZM2G073823'

'weakly similar to ( 197) loc\_os03g62020 12003.m11081 protein harpin-induced protein, putative, expressed seq=cds; coord=5:1576579..1577232:-1; parent\_gene=AC202974.3\_FG004'

'highly similar to ( 506) AT5G49580 | Symbols: | DNAJ heat shock N-terminal domain-containing protein | chr5:20123823-20126813 REVERSEhighly similar to ( 883) loc\_os03g61730 12003.m11054 protein heat shock protein binding protein, putative, expressed seq=cds; coord=5:1829665..1838651:-1; parent\_gene=GRMZM2G138511'

'very weakly similar to (98.2) AT2G37590 | Symbols: ATDOF2.4, DOF2.4 | Dof-type zinc finger domain-containing protein | chr2:15769292-15770497 FORWARDweakly similar to ( 157) loc\_os03g60630 12003.m10953 protein expressed protein seq=cds; coord=5:2343761..2345249:-1; parent\_gene=GRMZM2G144188'

'highly similar to ( 962) AT1G66150 | Symbols: TMK1 | TMK1 (TRANSMEMBRANE KINASE 1); transmembrane receptor protein serine/threonine kinase | chr1:24631503-24634415 FORWARDmoderately similar to ( 209) CR14\_MAIZE Putative receptor protein kinase CRINKLY4 precursor (EC 2.7.11.1) - Zea mays (Maize)nearly identical (1318) loc\_os03g50810 12003.m10067 protein receptor protein kinase TMK1 precursor, putative, expressed seq=cds; coord=5:10414656..10418698:1; parent\_gene=GRMZM2G158359'

'weakly similar to ( 160) AT3G58120 | Symbols: ATBZIP61, BZIP61 | BZIP61; DNA binding / transcription activator/transcription factor | chr3:21521289-21523078 REVERSEvery weakly similar to (85.9) RF2A\_ORYSA Transcription factor RF2a - Oryza sativa (Rice)moderately similar to ( 225) loc\_os02g14910 12002.m06735 protein bZIP transcription factor family protein, expressed seq=cds; coord=5:143972500..143974231:-1; parent\_gene=GRMZM2G158313'

'moderately similar to ( 248) AT5G40250 | Symbols: | zinc finger (C3HC4-type RING finger) family protein | chr5:16086056-16087186 FORWARDmoderately similar to ( 472) loc\_os02g50930 12002.m10127 protein RING-H2 finger protein ATLS1, putative, expressed seq=cds; coord=5:206555179..206557068:1; parent\_gene=GRMZM2G053303'

'moderately similar to ( 273) AT5G10770 | Symbols: | chloroplast nucleoid DNA-binding protein, putative | chr5:3403331-3405331 REVERSEmoderately similar to ( 481) loc\_os06g20140 12006.m06671 protein aspartic proteinase nepenthesin-1 precursor, putative seq=cds; coord=6:120916323..120918370:-1; parent\_gene=GRMZM2G405498'

'moderately similar to ( 261) AT4G36920 | Symbols: AP2, FLO2, FL1 | AP2 (APETALA 2); transcription factor | chr4:17400998-17403140 FORWARDweakly similar to ( 147) BBM2\_BRANA Protein BABY BOOM 2 (BnBBM2) - Brassica napus (Rape)moderately similar to ( 499) loc\_os07g13170 12007.m29109 protein floral homeotic protein, putative, expressed seq=cds; coord=7:22004372..22015553:1; parent\_gene=GRMZM2G176175'

'moderately similar to ( 451) AT1G32450 | Symbols: NRT1.5 | NRT1.5 (NITRATE TRANSPORTER 1.5); nitrate transmembrane transporter/ transporter | chr1:11715337-11719807 REVERSEmoderately similar to ( 434) loc\_os02g46460 12002.m09683 protein peptide transporter PTR2, putative, expressed seq=cds; coord=7:25089776..25092351:-1; parent\_gene=GRMZM2G156794'

'moderately similar to ( 214) AT3G04030 | Symbols: | myb family transcription factor | chr3:1042920-1044574  
REVERSEmoderately similar to ( 284) loc\_os07g48596 12007.m09071 protein MYR1, putative, expressed seq=cds;  
coord=7:173817875..173820052:-1; parent\_gene=AC155434.2\_FG005'

'weakly similar to ( 131) AT5G39660 | Symbols: CDF2 | CDF2 (CYCLING DOF FACTOR 2); DNA binding / protein  
binding / transcription factor | chr5:15878920-15880712 FORWARDvery weakly similar to (92.8) MNB1A\_MAIZE  
Dof zinc finger protein MNB1A - Zea mays (Maize)moderately similar to ( 399) loc\_os07g48570 12007.m09068  
protein expressed protein seq=cds; coord=7:173806883..173808319:-1; parent\_gene=AC155434.2\_FG006'

'moderately similar to ( 389) AT4G09160 | Symbols: | SEC14 cytosolic factor family protein / phosphoglyceride  
transfer family protein | chr4:5839761-5842158 FORWARDhighly similar to ( 623) loc\_os01g65380 12001.m12651  
protein patellin-5, putative, expressed seq=cds; coord=8:165856036..165859140:-1; parent\_gene=GRMZM2G033649'

'highly similar to ( 875) AT2G19900 | Symbols: ATNADP-ME1 | ATNADP-ME1 (NADP-malic enzyme 1); malate  
dehydrogenase (oxaloacetate-decarboxylating) (NADP

'weakly similar to ( 183) AT2G20570 | Symbols: GPRI1, GLK1 | GPRI1 (GBF'S PRO-RICH REGION-  
INTERACTING FACTOR 1); transcription factor/ transcription regulator | chr2:8855486-8857522  
FORWARDmoderately similar to ( 384) loc\_os06g24070 12006.m31875 protein transcription factor ZmGLK1,  
putative, expressed seq=cds; coord=9:2711408..2713807:-1; parent\_gene=GRMZM2G026833'

'moderately similar to ( 292) AT4G38660 | Symbols: | thaumatin, putative | chr4:18066448-18067792  
REVERSEmoderately similar to ( 232) TLP1\_PRUPE Thaumatin-like protein 1 precursor (PpAZ44) - Prunus persica  
(Peach)moderately similar to ( 380) loc\_os03g14030 12003.m06846 protein thaumatin-like protein 1 precursor,  
putative, expressed seq=cds; coord=9:143050607..143053350:1; parent\_gene=GRMZM2G149798'

'moderately similar to ( 325) AT1G08320 | Symbols: | bZIP family transcription factor | chr1:2622113-2627451 REVERSEmoderately similar to ( 303) TGA21\_TOBAC TGACG-sequence-specific DNA-binding protein TGA-2.1 (TGA2.1) - Nicotiana tabacum (Common tobacco)moderately similar to ( 409) loc\_os12g05680 12012.m04561 protein transcription factor HBP-1b, putative, expressed seq=cds; coord=10:5530500..5533143:-1; parent\_gene=GRMZM2G366264'

'moderately similar to ( 326) AT2G36010 | Symbols: E2F3, ATE2FA | E2F3 (E2F TRANSCRIPTION FACTOR 3); DNA binding / transcription factor | chr2:15119688-15122893 FORWARDhighly similar to ( 674) loc\_os12g06200 12012.m26841 protein transcription factor E2F2, putative, expressed seq=cds; coord=10:6659332..6664025:-1; parent\_gene=GRMZM2G052515'

'weakly similar to ( 145) AT3G19330 | Symbols: | polyadenylate-binding protein-related / PABP-related | chr3:6699423-6700772 FORWARD seq=cds; coord=10:113394167..113395746:-1; parent\_gene=GRMZM2G158300'

'highly similar to ( 641) AT4G21380 | Symbols: ARK3 | ARK3 (A. THALIANA RECEPTOR KINASE 3); kinase/ transmembrane receptor protein serine/threonine kinase | chr4:11389219-11393090 REVERSEmoderately similar to ( 299) SLSG6\_BRAOL S-locus-specific glycoprotein S6 precursor (SLSG-6) - Brassica oleracea (Wild cabbage)nearly identical (1018) loc\_os04g54070 12004.m10299 protein receptor-like kinase, putative, expressed seq=cds; coord=10:144143811..144147098:1; parent\_gene=GRMZM2G000620'

---

|                                     |
|-------------------------------------|
| <b>First Predicted Gene to Left</b> |
|-------------------------------------|

---

**Description**

---

'moderately similar to ( 264) AT5G48850 | Symbols: ATSDI1 | ATSDI1 (SULPHUR DEFICIENCY-INDUCED 1); binding | chr5:19805576-19807699 REVERSEmoderately similar to ( 398) loc\_os03g06970 12003.m06214 protein pollenless3, putative, expressed seq=cds; coord=1:13991176..13993273:-1; parent\_gene=GRMZM2G123986'

'highly similar to ( 714) AT2G26250 | Symbols: FDH, KCS10 | KCS10 (3-KETOACYL-COA SYNTHASE 10); acyltransferase/ catalytic/ transferase, transferring acyl groups other than amino-acyl groups | chr2:11170799-11173059 REVERSEhighly similar to ( 929) loc\_os03g08360 12003.m35563 protein fiddlehead-like protein, putative, expressed seq=cds; coord=1:16822675..16826498:1; parent\_gene=GRMZM2G445602'

'moderately similar to ( 266) AT2G21050 | Symbols: | amino acid permease, putative | chr2:9034289-9036439 FORWARDmoderately similar to ( 252) LAX5\_MEDTR Auxin transporter-like protein 5 (AUX1-like protein 5) (MtLAX5) - Medicago truncatula (Barrel medic)moderately similar to ( 277) loc\_os03g14080 12003.m06851 protein auxin transporter-like protein 3, putative, expressed seq=cds; coord=1:33317596..33321228:1; parent\_gene=GRMZM2G149481'

'very weakly similar to ( 100) AT3G24200 | Symbols: | FAD binding / monooxygenase/ oxidoreductase/ oxidoreductase, acting on paired donors, with incorporation or reduction of molecular oxygen, NADH or NADPH as one donor, and incorporation of one atom of oxygen | chr3:8748095-8751166 REVERSEweakly similar to ( 158) loc\_os03g62260 12003.m11104 protein monooxygenase/ oxidoreductase, putative, expressed seq=cds; coord=1:165614250..165617511:1; parent\_gene=GRMZM2G369987'

'very weakly similar to (83.6) loc\_os04g20920 12004.m07245 protein transcription regulator, putative, expressed seq=cds; coord=1:177148034..177150936:1; parent\_gene=AC199908.4\_FG002'

'weakly similar to ( 163) AT5G64200 | Symbols: ATSC35, SC35 | ATSC35; RNA binding / nucleic acid binding / nucleotide binding | chr5:25681849-25683553 REVERSEweakly similar to ( 187) loc\_os08g37960 12008.m26517 protein splicing factor, arginine/serine-rich 2, putative, expressed seq=cds; coord=1:182538397..182541456:-1; parent\_gene=GRMZM2G110143'

'weakly similar to ( 196) AT1G14685 | Symbols: BPC2, BBR/BPC2, ATBPC2 | BPC2 (BASIC PENTACYSTEINE 2); DNA binding / transcription factor | chr1:5043086-5043925 FORWARDmoderately similar to ( 236) loc\_os10g02584 12010.m065191 protein GAGA-binding protein, putative, expressed seq=cds; coord=1:192490099..192492652:-1; parent\_gene=GRMZM2G179366'

'moderately similar to ( 337) AT2G02070 | Symbols: AtIDD5 | AtIDD5 (Arabidopsis thaliana Indeterminate(ID)-Domain 5); nucleic acid binding / transcription factor/ zinc ion binding | chr2:505523-509154 FORWARDhighly similar to ( 571) loc\_os08g44050 12008.m26786 protein INDETERMINATE-related protein 1, putative, expressed seq=cds; coord=1:206117307..206124458:1; parent\_gene=GRMZM2G179677'

'weakly similar to ( 157) AT3G11750 | Symbols: | dihydroneopterin aldolase, putative | chr3:3715071-3715904 REVERSEmoderately similar to ( 206) loc\_os09g38759 12009.m50203 protein dihydroneopterin aldolase, putative, expressed seq=cds; coord=1:206197528..206201863:1; parent\_gene=GRMZM2G095579'

'moderately similar to ( 324) AT5G24400 | Symbols: emb2024 | emb2024 (embryo defective 2024); 6-phosphogluconolactonase/ catalytic | chr5:8330532-8331784 REVERSEmoderately similar to ( 418) loc\_os09g35970 12009.m06548 protein 6-phosphogluconolactonase, putative, expressed seq=cds; coord=1:207611046..207613075:-1; parent\_gene=GRMZM2G122126'

'moderately similar to ( 485) AT5G21482 | Symbols: CKX7, ATCKX5 | CKX7 (CYTOKININ OXIDASE 7); cytokinin dehydrogenase/ oxidoreductase | chr5:7226842-7230052 FORWARDmoderately similar to ( 321) CKX1\_MAIZE Cytokinin dehydrogenase 1 precursor (EC 1.5.99.12) (Cytokinin oxidase 1) (CKO 1) (COX 1) (ZmCKX1) - Zea mays (Maize)highly similar to ( 706) loc\_os08g35860 12008.m07575 protein cytokinin dehydrogenase 7, putative, expressed seq=cds; coord=1:207708925..207713476:1; parent\_gene=GRMZM2G348452'

'very weakly similar to (96.7) loc\_os08g35190 12008.m26509 protein auxin-repressed protein, putative, expressed seq=cds; coord=1:208963692..208966672:1; parent\_gene=GRMZM2G125557'

'highly similar to ( 745) AT2G18700 | Symbols: ATTPS11, TPS11, ATTPSB | ATTPS11; transferase, transferring glycosyl groups | chr2:8109043-8111799 FORWARDnearly identical (1055) loc\_os08g34580 12008.m26506 protein trehalose-6-phosphate synthase, putative, expressed seq=cds; coord=1:210663759..210667488:-1; parent\_gene=GRMZM2G079928'

'moderately similar to ( 315) AT2G22480 | Symbols: PFK5 | PFK5 (PHOSPHOFRUCTOKINASE 5); 6-phosphofructokinase | chr2:9545670-9548414 FORWARDmoderately similar to ( 454) loc\_os08g34050 12008.m07394 protein 6-phosphofructokinase 2, putative seq=cds; coord=1:212484786..212489531:1; parent\_gene=GRMZM2G139360'

'highly similar to ( 809) AT5G62890 | Symbols: | permease, putative | chr5:25243723-25246748 FORWARDhighly similar to ( 972) loc\_os08g32500 12008.m07244 protein permease, putative, expressed seq=cds; coord=1:219063550..219067715:1; parent\_gene=GRMZM2G115635'

'very weakly similar to (84.7) AT2G18040 | Symbols: PIN1AT | PIN1AT (PEPTIDYLPROLYL CIS/TRANS ISOMERASE, NIMA-INTERACTING 1); peptidyl-prolyl cis-trans isomerase | chr2:7842346-7843537 FORWARDvery weakly similar to (85.9) PIN1\_MALDO Peptidyl-prolyl cis-trans isomerase 1 (EC 5.2.1.8) (Rotamase Pin1) (PPIase Pin1) (MdPin1) - Malus domestica (Apple) (Malus sylvestris)weakly similar to ( 136) loc\_os04g56800 12004.m10567 protein peptidyl-prolyl cis-trans isomerase 1, putative, expressed seq=cds; coord=2:3366755..3369670:1; parent\_gene=GRMZM2G047590'

'moderately similar to ( 245) AT1G34300 | Symbols: | lectin protein kinase family protein | chr1:12503450-12505939 FORWARDweakly similar to ( 177) KPRO\_MAIZE Putative receptor protein kinase ZmPK1 precursor (EC 2.7.11.1) - Zea mays (Maize)highly similar to ( 556) loc\_os04g56120 12004.m10503 protein receptor-like kinase, putative, expressed seq=cds; coord=2:4369756..4371294:-1; parent\_gene=GRMZM2G363066'

'moderately similar to ( 494) AT5G67200 | Symbols: | leucine-rich repeat transmembrane protein kinase, putative | chr5:26813893-26816555 REVERSEweakly similar to ( 149) PSKR\_DAUCA Phytosulfokine receptor precursor (EC 2.7.11.1) (Phytosulfokine LRR receptor kinase) - Daucus carota (Carrot)nearly identical (1002) loc\_os04g55620 12004.m10453 protein receptor kinase, putative, expressed seq=cds; coord=2:5374131..5380129:1; parent\_gene=GRMZM2G055844'

'moderately similar to ( 340) AT5G10030 | Symbols: TGA4, OBF4 | TGA4 (TGACG MOTIF-BINDING FACTOR 4); DNA binding / calmodulin binding / transcription factor | chr5:3137648-3139295 REVERSEmoderately similar to ( 321) TGA1A\_TOBAC TGACG-sequence-specific DNA-binding protein TGA-1A (TGA1a) (ASF-1 protein) - Nicotiana tabacum (Common tobacco)highly similar to ( 515) loc\_os04g54474 12004.m101669 protein transcription factor TGA4, putative, expressed seq=cds; coord=2:6717922..6723608:1; parent\_gene=GRMZM2G131961'



'moderately similar to ( 385) AT1G79460 | Symbols: GA2, KS, ATKS | GA2 (GA REQUIRING 2); ent-kaurene synthase | chr1:29890568-29894436 FORWARDmoderately similar to ( 363) KSB\_CUCMA Ent-kaurene synthase B, chloroplast precursor (EC 4.2.3.19) (KSB) - Cucurbita maxima (Pumpkin) (Winter squash)highly similar to ( 588) loc\_os04g52210 12004.m10116 protein ent-kaurene synthase B, chloroplast precursor, putative, expressed seq=cds; coord=2:10596796..10605493:1; parent\_gene=GRMZM2G049538'

'highly similar to ( 613) AT2G24360 | Symbols: | serine/threonine/tyrosine kinase, putative | chr2:10364742-10366075 REVERSEweakly similar to ( 116) NORK\_PEA Nodulation receptor kinase precursor (EC 2.7.11.1) - Pisum sativum (Garden pea)highly similar to ( 771) loc\_os04g51950 12004.m10090 protein serine/threonine protein kinase, putative, expressed seq=cds; coord=2:11197500..11201569:1; parent\_gene=GRMZM2G102088'

'weakly similar to ( 105) loc\_os03g32526 12003.m08494 protein expressed protein seq=cds; coord=2:13459177..13467511:-1; parent\_gene=AC195235.3\_FG003'

'weakly similar to ( 117) AT5G47230 | Symbols: ERF5, ATERF-5, ATERF5 | ERF5 (ETHYLENE RESPONSIVE ELEMENT BINDING FACTOR 5); DNA binding / transcription activator/ transcription factor | chr5:19180072-19180974 FORWARDweakly similar to ( 110) ERF5\_TOBAC Ethylene-responsive transcription factor 5 (Ethylene-responsive element-binding factor 5 homolog) (EREBP-4) (NtERF4) - Nicotiana tabacum (Common tobacco)weakly similar to ( 176) loc\_os04g46250 12004.m09575 protein AP2 domain containing protein, expressed seq=cds; coord=2:20563651..20564721:-1; parent\_gene=GRMZM2G475678'

'nearly identical (1071) AT1G76950 | Symbols: PRAF1 | PRAF1; Ran GTPase binding / chromatin binding / zinc ion binding | chr1:28906952-28911325 FORWARDnearly identical (1565) loc\_os04g58960 12004.m10775 protein ran GTPase binding protein, putative, expressed seq=cds; coord=2:24030713..24037024:-1; parent\_gene=GRMZM2G124371'

'weakly similar to ( 129) AT5G14360 | Symbols: | ubiquitin family protein | chr5:4631038-4631641 FORWARDweakly similar to ( 167) loc\_os02g38410 12002.m08929 protein BCL-2 binding anthanogene-1, putative, expressed seq=cds; coord=2:36824114..36825732:-1; parent\_gene=GRMZM2G045117'

'weakly similar to ( 139) loc\_os12g32986 12012.m27011 protein heat shock protein 83, putative, expressed seq=cds; coord=2:189610974..189617149:1; parent\_gene=GRMZM2G474367'

'moderately similar to ( 434) AT3G20810 | Symbols: | transcription factor jumonji (jmc) domain-containing protein | chr3:7275814-7278182 FORWARDhighly similar to ( 523) loc\_os09g31380 12009.m06252 protein conserved hypothetical protein seq=cds; coord=2:189777176..189782078:1; parent\_gene=GRMZM2G052908'

'moderately similar to ( 317) AT2G44610 | Symbols: RAB6, ATRABH1B, ATRAB6A, RAB6A | RAB6A; GTP binding / protein binding | chr2:18411778-18413883 REVERSEweakly similar to ( 135) RGP2\_ORYSA Ras-related protein RGP2 (GTP-binding regulatory protein RGP2) - Oryza sativa (Rice)moderately similar to ( 318) loc\_os07g31370 12007.m07406 protein ras-related protein Rab-6A, putative, expressed seq=cds; coord=2:212301578..212321626:1; parent\_gene=GRMZM2G128771'

'highly similar to ( 572) AT5G50300 | Symbols: | xanthine/uracil/vitamin C permease family protein | chr5:20466492-20468084 REVERSEhighly similar to ( 792) loc\_os11g24060 12011.m06332 protein transmembrane transport protein-like, putative, expressed seq=cds; coord=2:218937924..218939954:1; parent\_gene=GRMZM2G068220'

'moderately similar to ( 415) AT3G23750 | Symbols: | leucine-rich repeat family protein / protein kinase family protein | chr3:8558332-8561263 FORWARDmoderately similar to ( 201) CRI4\_MAIZE Putative receptor protein kinase CRINKLY4 precursor (EC 2.7.11.1) - Zea mays (Maize)nearly identical (1155) loc\_os11g26130 12011.m06534 protein receptor protein kinase TMK1 precursor, putative, expressed seq=cds; coord=2:220750945..220758496:1; parent\_gene=GRMZM2G349875'

'very weakly similar to (94.7) AT1G52950 | Symbols: | replication protein-related | chr1:19725483-19728007 FORWARDmoderately similar to ( 207) loc\_os07g02230 12007.m04695 protein retrotransposon protein, putative, unclassified, expressed seq=cds; coord=3:88916116..88921100:1; parent\_gene=GRMZM2G351307'

'moderately similar to ( 244) AT5G21170 | Symbols: | 5'-AMP-activated protein kinase beta-2 subunit, putative | chr5:7205718-7208239 FORWARDmoderately similar to ( 343) loc\_os03g20340 12003.m07444 protein SNF1-related protein kinase regulatory subunit beta-1, putative, expressed seq=cds; coord=3:139808606..139811549:-1; parent\_gene=GRMZM2G027632'

'weakly similar to ( 147) AT1G24620 | Symbols: | polcalcin, putative / calcium-binding pollen allergen, putative | chr1:8723893-8724453 REVERSEweakly similar to ( 111) CALM\_CHLRE Calmodulin (CaM) - Chlamydomonas reinhardtii moderately similar to ( 254) loc\_os01g72100 12001.m13246 protein polcalcin Jun o 2, putative, expressed seq=cds; coord=3:149552437..149553876:1; parent\_gene=GRMZM2G106945'

'highly similar to ( 853) AT1G72180 | Symbols: | leucine-rich repeat transmembrane protein kinase, putative | chr1:27164074-27167204 FORWARDmoderately similar to ( 416) RPK1\_IPONI Receptor-like protein kinase precursor (EC 2.7.11.1) - Ipomoea nil (Japanese morning glory) (Pharbitis nil)nearly identical (1417) loc\_os01g65650 12001.m12674 protein receptor-like protein kinase 5 precursor, putative, expressed seq=cds; coord=3:172374935..172378448:-1; parent\_gene=GRMZM2G167253'

'highly similar to ( 678) AT1G43620 | Symbols: | UDP-glucose:sterol glucosyltransferase, putative | chr1:16425654-16429500 REVERSEnearly identical (1015) loc\_os01g64750 12001.m12589 protein sterol 3-beta-glucosyltransferase, putative, expressed seq=cds; coord=3:175571565..175589373:-1; parent\_gene=GRMZM2G149617'

'moderately similar to ( 439) AT5G01210 | Symbols: | transferase family protein | chr5:84554-85981 FORWARDvery weakly similar to (82.0) HCBT1\_DIACA Anthranilate N-benzoyltransferase protein 1 (EC 2.3.1.144) (Anthranilate N-hydroxycinnamoyl/benzoyltransferase 1) - Dianthus caryophyllus (Carnation) (Clove pink)highly similar to ( 776) loc\_os01g63480 12001.m12464 protein AER, putative, expressed seq=cds; coord=3:178409357..178411316:-1; parent\_gene=GRMZM2G165192'

'highly similar to ( 650) AT5G53450 | Symbols: ORG1 | ORG1 (OBP3-responsive gene 1); ATP binding / kinase/ protein kinase | chr5:21689444-21692242 FORWARDhighly similar to ( 938) loc\_os01g46720 12001.m10869 protein protein kinase domain containing protein, expressed seq=cds; coord=3:213005290..213017220:-1; parent\_gene=GRMZM2G150952'

'highly similar to ( 868) AT3G58610 | Symbols: | ketol-acid reductoisomerase | chr3:21671561-21674639  
FORWARDhighly similar to ( 858) ILV5\_PEA Ketol-acid reductoisomerase, chloroplast precursor (EC 1.1.1.86)  
(Acetohydroxy-acid reductoisomerase) (Alpha-keto-beta-hydroxylacil reductoisomerase) - Pisum sativum (Garden  
pea)highly similar to ( 920) loc\_os01g46380 12001.m10836 protein ketol-acid reductoisomerase, chloroplast  
precursor, putative, expressed seq=cds; coord=3:213623450..213627174:-1; parent\_gene=GRMZM2G004382'

'highly similar to ( 868) AT3G58610 | Symbols: | ketol-acid reductoisomerase | chr3:21671561-21674639  
FORWARDhighly similar to ( 858) ILV5\_PEA Ketol-acid reductoisomerase, chloroplast precursor (EC 1.1.1.86)  
(Acetohydroxy-acid reductoisomerase) (Alpha-keto-beta-hydroxylacil reductoisomerase) - Pisum sativum (Garden  
pea)highly similar to ( 920) loc\_os01g46380 12001.m10836 protein ketol-acid reductoisomerase, chloroplast  
precursor, putative, expressed seq=cds; coord=3:213623450..213627174:-1; parent\_gene=GRMZM2G004382'

'highly similar to ( 627) AT2G26650 | Symbols: AKT1, ATAKT1 | AKT1 (ARABIDOPSIS K TRANSPORTER 1);  
cyclic nucleotide binding / inward rectifier potassium channel | chr2:11331965-11336444 REVERSEhighly similar to  
( 824) AKT1\_ORYSA Potassium channel AKT1 (OsAKT1) - Oryza sativa (Rice)highly similar to ( 824)  
loc\_os01g45990 12001.m10798 protein potassium channel AKT1, putative, expressed seq=cds;  
coord=3:214273957..214280038:1; parent\_gene=GRMZM2G022915'

'very weakly similar to (98.6) AT3G23550 | Symbols: | MATE efflux family protein | chr3:8448435-8450649  
REVERSEweakly similar to ( 124) loc\_os07g01750 12007.m04654 protein transparent testa 12 protein, putative,  
expressed seq=cds; coord=3:216484840..216488798:-1; parent\_gene=GRMZM2G000593'

'moderately similar to ( 323) AT1G15950 | Symbols: CCR1, IRX4, ATCCR1 | CCR1 (CINNAMOYL COA  
REDUCTASE 1); cinnamoyl-CoA reductase | chr1:5478855-5481949 FORWARDweakly similar to ( 171)  
DFRA\_MAIZE Dihydroflavonol-4-reductase (EC 1.1.1.219) (DFR) (Dihydrokaempferol 4-reductase) - Zea mays  
(Maize)highly similar to ( 513) loc\_os02g56460 12002.m10668 protein dihydroflavonol-4-reductase, putative,  
expressed seq=cds; coord=4:171783871..171785676:-1; parent\_gene=GRMZM2G099420'

'highly similar to ( 694) AT5G60710 | Symbols: | zinc finger (C3HC4-type RING finger) family protein |  
chr5:24410953-24414849 REVERSEnearly identical (1189) loc\_os02g56280 12002.m10651 protein protein binding  
protein, putative, expressed seq=cds; coord=4:172685051..172689834:1; parent\_gene=GRMZM2G130002'

'highly similar to ( 694) AT5G60710 | Symbols: | zinc finger (C3HC4-type RING finger) family protein |  
chr5:24410953-24414849 REVERSEnearly identical (1189) loc\_os02g56280 12002.m10651 protein protein binding  
protein, putative, expressed seq=cds; coord=4:172685051..172689834:1; parent\_gene=GRMZM2G130002'

'weakly similar to ( 104) AT4G31985 | Symbols: | 60S ribosomal protein L39 (RPL39C) | chr4:15469931-15470366  
FORWARDweakly similar to ( 112) RL39\_ORYSA 60S ribosomal protein L39 - Oryza sativa (Rice)weakly similar to  
( 112) loc\_os02g55390 12002.m100783 protein 60S ribosomal protein L39, putative, expressed seq=cds;  
coord=4:173792258..173793051:-1; parent\_gene=GRMZM2G411764'

'moderately similar to ( 339) AT5G48330 | Symbols: | regulator of chromosome condensation (RCC1) family protein |  
chr5:19585989-19587729 FORWARDhighly similar to ( 577) loc\_os02g10380 12002.m06336 protein regulator of  
chromosome condensation like, putative, expressed seq=cds; coord=4:233209443..233212350:1;  
parent\_gene=GRMZM2G030542'

'moderately similar to ( 393) AT5G42320 | Symbols: | metalloproteinase/ zinc ion binding | chr5:16918651-16920845 REVERSEhighly similar to ( 655) loc\_os02g02710 12002.m33511 protein carboxypeptidase A, putative, expressed seq=cds; coord=4:239686593..239692358:-1; parent\_gene=GRMZM2G006069'

'moderately similar to ( 260) AT3G01980 | Symbols: | short-chain dehydrogenase/reductase (SDR) family protein | chr3:327747-328833 REVERSEmoderately similar to ( 390) loc\_os03g63290 12003.m11197 protein alcohol dehydrogenases, putative, expressed seq=cds; coord=5:1044358..1047150:1; parent\_gene=GRMZM2G013042'

'moderately similar to ( 350) AT3G05420 | Symbols: ACBP4 | ACBP4 (ACYL-COA BINDING PROTEIN 4); acyl-CoA binding | chr3:1561880-1567047 FORWARDmoderately similar to ( 434) loc\_os03g61930 12003.m35507 protein acyl-CoA binding protein, putative, expressed seq=cds; coord=5:1608613..1611742:1; parent\_gene=GRMZM2G326195'

'weakly similar to ( 106) AT5G58490 | Symbols: | cinnamoyl-CoA reductase family | chr5:23643068-23644455 FORWARDweakly similar to ( 135) loc\_os03g60380 12003.m10928 protein dihydroflavonol-4-reductase, putative, expressed seq=cds; coord=5:2593504..2594875:1; parent\_gene=GRMZM2G110952'

'moderately similar to ( 324) AT5G58490 | Symbols: | cinnamoyl-CoA reductase family | chr5:23643068-23644455 FORWARDweakly similar to ( 157) DFRA\_DIACA Dihydroflavonol-4-reductase (EC 1.1.1.219) (DFR) (Dihydrokaempferol 4-reductase) - Dianthus caryophyllus (Carnation) (Clove pink)moderately similar to ( 412) loc\_os03g60380 12003.m10928 protein dihydroflavonol-4-reductase, putative, expressed seq=cds; coord=5:2594137..2603606:-1; parent\_gene=GRMZM2G110881'

'very weakly similar to (90.1) TIP31\_ORYSA Probable aquaporin TIP3.1 (Tonoplast intrinsic protein 3.1) (OsTIP3.1) - Oryza sativa (Rice)very weakly similar to (90.1) loc\_os10g35050 12010.m06328 protein aquaporin TIP3.1, putative, expressed seq=cds; coord=5:25511080..25511685:1; parent\_gene=GRMZM2G305446'

'weakly similar to ( 108) AT1G77670 | Symbols: | aminotransferase class I and II family protein | chr1:29189043-29190901 REVERSEmoderately similar to ( 301) loc\_os10g34350 12010.m06261 protein kynurenine--oxoglutarate transaminase 1, putative, expressed seq=cds; coord=5:27099256..27102677:1; parent\_gene=GRMZM2G174145'

'weakly similar to ( 108) AT1G77670 | Symbols: | aminotransferase class I and II family protein | chr1:29189043-29190901 REVERSEmoderately similar to ( 301) loc\_os10g34350 12010.m06261 protein kynurenine--oxoglutarate transaminase 1, putative, expressed seq=cds; coord=5:27099256..27102677:1; parent\_gene=GRMZM2G174145'

'moderately similar to ( 337) AT2G37210 | Symbols: | Encodes a protein of unknown function. It has been crystallized and shown to be structurally almost identical to the protein encoded by At5g11950. | chr2:15624253-15626834 REVERSEmoderately similar to ( 387) loc\_os10g33900 12010.m06219 protein carboxy-lyase, putative, expressed seq=cds; coord=5:28109811..28112194:-1; parent\_gene=GRMZM2G100360'

'moderately similar to ( 213) AT4G35220 | Symbols: | cyclase family protein | chr4:16752636-16753966 FORWARDmoderately similar to ( 271) loc\_os09g02270 12009.m03600 protein cyclase, putative, expressed seq=cds; coord=5:28436619..28440123:1; parent\_gene=GRMZM2G138744'

'moderately similar to ( 277) AT3G04400 | Symbols: emb2171 | emb2171 (embryo defective 2171); structural constituent of ribosome | chr3:1167339-1168308 FORWARDmoderately similar to ( 274) RL23\_TOBAC 60S ribosomal protein L23 - Nicotiana tabacum (Common tobacco)moderately similar to ( 279) loc\_os10g32920 12010.m06128 protein 60S ribosomal protein L23, putative, expressed seq=cds; coord=5:30596598..30600002:1; parent\_gene=GRMZM2G123495'

'highly similar to ( 603) AT3G23990 | Symbols: HSP60, HSP60-3B | HSP60 (HEAT SHOCK PROTEIN 60); ATP binding | chr3:8669013-8672278 FORWARDhighly similar to ( 684) CH61\_MAIZE Chaperonin CPN60-1, mitochondrial precursor (HSP60-1) - Zea mays (Maize)highly similar to ( 652) loc\_os10g32550 12010.m06092 protein chaperonin CPN60-1, mitochondrial precursor, putative, expressed seq=cds; coord=5:31002750..31006569:-1; parent\_gene=GRMZM2G458208'

'moderately similar to ( 219) AT1G63800 | Symbols: UBC5 | UBC5 (ubiquitin-conjugating enzyme 5); ubiquitin-protein ligase | chr1:23667888-23669003 REVERSEmoderately similar to ( 218) UBC4\_WHEAT Ubiquitin-conjugating enzyme E2-23 kDa (EC 6.3.2.19) (Ubiquitin-protein ligase) (Ubiquitin carrier protein) - Triticum aestivum (Wheat)moderately similar to ( 244) loc\_os10g31000 12010.m21788 protein ubiquitin-conjugating enzyme E2-21 kDa 1, putative, expressed seq=cds; coord=5:31648146..31651787:-1; parent\_gene=GRMZM2G146374'

'weakly similar to ( 106) loc\_os10g30719 12010.m05931 protein myb-like DNA-binding domain containing protein, expressed seq=cds; coord=5:31901583..31906914:-1; parent\_gene=GRMZM2G046438'

'weakly similar to ( 196) AT4G35040 | Symbols: | bZIP transcription factor family protein | chr4:16680821-16681805 FORWARDmoderately similar to ( 378) loc\_os06g50310 12006.m09555 protein DNA binding protein, putative, expressed seq=cds; coord=5:61696485..61700292:1; parent\_gene=GRMZM2G000171'

'highly similar to ( 731) AT3G19240 | Symbols: | FUNCTIONS IN: molecular\_function unknown; INVOLVED IN: N-terminal protein myristoylation; LOCATED IN: cellular\_component unknown; EXPRESSED IN: 25 plant structures; EXPRESSED DURING: 15 growth stages; CONTAINS InterPro DOMAIN/s: WD40 repeat-like (InterPro:IPR011046) Vacuolar import and degradation, Vid27-related (InterPro:IPR013863); BEST Arabidopsis thaliana protein match is: dem protein-related / defective embryo and meristems protein-related (TAIR:AT4G33400.1); Has 206 Blast hits to 202 proteins in 88 species: Archae - 0; Bacteria - 0; Metazoa - 11; Fungi - 117; Plants - 38; Viruses - 0; Other Eukaryotes - 40 (source: NCBI BLINK). | chr3:6664383-6666423 FORWARDnearly identical (1075) loc\_os02g08190 12002.m06165 protein protein CYPRO4, putative, expressed seq=cds; coord=5:89859666..89864514:-1; parent\_gene=GRMZM2G131638'

'moderately similar to ( 232) AT3G23250 | Symbols: MYB15, ATY19, ATMYB15 | MYB15 (MYB DOMAIN PROTEIN 15); DNA binding / transcription factor | chr3:8309742-8310624 FORWARDmoderately similar to ( 285) MYB4\_ORYSA Myb-related protein Myb4 (OsMyb4) (Transcription factor RLTR1) - Oryza sativa (Rice)moderately similar to ( 322) loc\_os02g41510 12002.m09187 protein myb-related protein Myb4, putative, expressed seq=cds; coord=5:186413823..186415077:-1; parent\_gene=GRMZM2G095904'

'weakly similar to ( 128) AT2G44940 | Symbols: | AP2 domain-containing transcription factor TINY, putative | chr2:18537294-18538181 FORWARDvery weakly similar to (83.6) ERF1\_ORYSA Ethylene-responsive transcription factor 1 (Ethylene-responsive element-binding factor 1) (EREBP-1) (OsEREBP1) - Oryza sativa (Rice)weakly similar to ( 169) loc\_os04g46410 12004.m09590 protein dehydration-responsive element-binding protein 1B, putative, expressed seq=cds; coord=5:191851620..191853237:1; parent\_gene=GRMZM2G041839'

'weakly similar to ( 144) AT5G62940 | Symbols: | Dof-type zinc finger domain-containing protein | chr5:25257183-25258504 REVERSEweakly similar to ( 119) PBF\_MAIZE Dof zinc finger protein PBF (Prolamin box-binding factor) - Zea mays (Maize)moderately similar to ( 360) loc\_os02g47810 12002.m09815 protein dof domain, zinc finger family protein, expressed seq=cds; coord=5:201381499..201385596:-1; parent\_gene=GRMZM2G140694'

'moderately similar to ( 241) AT3G07880 | Symbols: | Rho GDP-dissociation inhibitor family protein | chr3:2514175-2515544 FORWARDmoderately similar to ( 268) loc\_os02g48730 12002.m09907 protein rho GDP-dissociation inhibitor 1, putative, expressed seq=cds; coord=5:203617123..203618504:1; parent\_gene=GRMZM2G085049'

'moderately similar to ( 320) AT3G48160 | Symbols: DEL1, E2L3, E2FE | DEL1 (DP-E2F-LIKE 1); DNA binding / transcription factor | chr3:17783641-17785846 FORWARDhighly similar to ( 548) loc\_os02g50630 12002.m10097 protein transcription regulator of the cell cycle TaE2Fe, putative, expressed seq=cds; coord=5:205783382..205786772:-1; parent\_gene=GRMZM2G378665'

'very weakly similar to ( 100) AT1G26945 | Symbols: KDR | KDR (KIDARI); transcription regulator | chr1:9351571-9352474 FORWARDweakly similar to ( 155) loc\_os02g51320 12002.m10166 protein DNA binding protein, putative, expressed seq=cds; coord=5:207504983..207506597:-1; parent\_gene=GRMZM2G036092'

'moderately similar to ( 385) AT5G65020 | Symbols: ANNAT2 | ANNAT2 (Annexin Arabidopsis 2); calcium ion binding / calcium-dependent phospholipid binding | chr5:25974366-25975554 FORWARDmoderately similar to ( 343) ANX4\_FRAAN Annexin-like protein RJ4 - Fragaria ananassa (Strawberry)highly similar to ( 566) loc\_os02g51750 12002.m10206 protein annexin-like protein RJ4, putative, expressed seq=cds; coord=5:208194750..208197747:1; parent\_gene=GRMZM2G061950'

'moderately similar to ( 385) AT5G65020 | Symbols: ANNAT2 | ANNAT2 (Annexin Arabidopsis 2); calcium ion binding / calcium-dependent phospholipid binding | chr5:25974366-25975554 FORWARDmoderately similar to ( 343) ANX4\_FRAAN Annexin-like protein RJ4 - Fragaria ananassa (Strawberry)highly similar to ( 566) loc\_os02g51750 12002.m10206 protein annexin-like protein RJ4, putative, expressed seq=cds; coord=5:208194750..208197747:1; parent\_gene=GRMZM2G061950'

'moderately similar to ( 299) ATCG00170 | Symbols: RPOC2 | RNA polymerase beta' subunit-2 | chrC:15938-20068 REVERSEnearly identical (1103) RPOC2\_MAIZE DNA-directed RNA polymerase beta" chain (EC 2.7.7.6) (PEP) (Plastid-encoded RNA polymerase beta" subunit) (RNA polymerase beta" subunit) - Zea mays (Maize)highly similar to ( 578) loc\_osp1g00260 11562.m00015 protein RNA polymerase beta" chain seq=cds; coord=5:210010750..210014897:1; parent\_gene=GRMZM2G055859'

'highly similar to ( 786) AT5G49030 | Symbols: OVA2 | OVA2 (ovule abortion 2); ATP binding / aminoacyl-tRNA ligase/ isoleucine-tRNA ligase/ nucleotide binding | chr5:19876365-19882291 REVERSEhighly similar to ( 969) loc\_os02g53770 12002.m33899 protein isoleucyl-tRNA synthetase, putative, expressed seq=cds; coord=5:211898501..211913266:1; parent\_gene=GRMZM2G478664'

'highly similar to ( 786) AT5G49030 | Symbols: OVA2 | OVA2 (ovule abortion 2); ATP binding / aminoacyl-tRNA ligase/ isoleucine-tRNA ligase/ nucleotide binding | chr5:19876365-19882291 REVERSEhighly similar to ( 969) loc\_os02g53770 12002.m33899 protein isoleucyl-tRNA synthetase, putative, expressed seq=cds; coord=5:211898501..211913266:1; parent\_gene=GRMZM2G478664'

'moderately similar to ( 282) AT2G02450 | Symbols: ANAC035 | ANAC035 (Arabidopsis NAC domain containing protein 35); transcription factor | chr2:648044-650649 FORWARDweakly similar to ( 172) NAC48\_ORYSA NAC domain-containing protein 48 (ONAC048) - Oryza sativa (Rice)moderately similar to ( 355) loc\_os08g02160 12008.m04362 protein NAC domain-containing protein 68, putative, expressed seq=cds; coord=6:3869561..3872846:1; parent\_gene=GRMZM2G030325'

'moderately similar to ( 228) AT5G59890 | Symbols: ADF4, ATADF4 | ADF4 (ACTIN DEPOLYMERIZING FACTOR 4); actin binding | chr5:24123107-24123596 FORWARDmoderately similar to ( 231) ADF1\_PETHY Actin-depolymerizing factor 1 (ADF 1) - Petunia hybrida (Petunia)moderately similar to ( 254) loc\_os05g02250 12005.m64199 protein expressed protein seq=cds; coord=6:35896131..35897803:-1; parent\_gene=GRMZM2G037140'

'moderately similar to ( 211) AT3G46620 | Symbols: | zinc finger (C3HC4-type RING finger) family protein | chr3:17178837-17180024 REVERSEmoderately similar to ( 351) loc\_os05g01940 12005.m04730 protein zinc finger, RING-type, putative, expressed seq=cds; coord=6:38792335..38794002:-1; parent\_gene=GRMZM2G567897'

'weakly similar to ( 107) loc\_os06g07130 12006.m05437 protein SHR5-receptor-like kinase, putative, expressed seq=cds; coord=6:80901468..80907416:1; parent\_gene=GRMZM2G103033'

'moderately similar to ( 494) AT1G62400 | Symbols: HT1 | HT1 (high leaf temperature 1); kinase/ protein serine/threonine/tyrosine kinase | chr1:23090243-23091529 FORWARDvery weakly similar to ( 100) PSKR\_DAUCA Phytosulfokine receptor precursor (EC 2.7.11.1) (Phytosulfokine LRR receptor kinase) - Daucus carota (Carrot)highly similar to ( 621) loc\_os06g43030 12006.m08833 protein HT1 protein kinase, putative, expressed seq=cds; coord=6:97343332..97346122:-1; parent\_gene=GRMZM2G018280'

'moderately similar to ( 233) AT5G47650 | Symbols: ATNUDT2, ATNUDX2 | ATNUDT2 (ARABIDOPSIS THALIANA NUDIX HYDROLASE HOMOLOG 2); ADP-ribose diphosphatase/ NAD or NADH binding / hydrolase | chr5:19310391-19312084 REVERSEmoderately similar to ( 357) loc\_os06g42790 12006.m32122 protein nudix hydrolase 2, putative, expressed seq=cds; coord=6:97631102..97634957:1; parent\_gene=GRMZM2G162605'

'nearly identical (1068) AT1G70300 | Symbols: KUP6 | KUP6; potassium ion transmembrane transporter | chr1:26477993-26481233 REVERSEnearly identical (1291) HAK10\_ORYSA Potassium transporter 10 (OsHAK10) - Oryza sativa (Rice)nearly identical (1291) loc\_os06g42030 12006.m08735 protein potassium transporter 10, putative, expressed seq=cds; coord=6:97941833..97946553:1; parent\_gene=GRMZM2G146760'

'nearly identical (1068) AT1G70300 | Symbols: KUP6 | KUP6; potassium ion transmembrane transporter | chr1:26477993-26481233 REVERSEnearly identical (1291) HAK10\_ORYSA Potassium transporter 10 (OsHAK10) - Oryza sativa (Rice)nearly identical (1291) loc\_os06g42030 12006.m08735 protein potassium transporter 10, putative, expressed seq=cds; coord=6:97941833..97946553:1; parent\_gene=GRMZM2G146760'

'moderately similar to ( 397) AT2G17410 | Symbols: | ARID/BRIGHT DNA-binding domain-containing protein | chr2:7559869-7563474 FORWARDhighly similar to ( 566) loc\_os06g41730 12006.m31901 protein ARID/BRIGHT DNA binding domain containing protein, expressed seq=cds; coord=6:98085264..98091283:-1; parent\_gene=GRMZM2G180654'

'highly similar to ( 675) AT5G55230 | Symbols: ATMAP65-1, MAP65-1 | ATMAP65-1 (MICROTUBULE-ASSOCIATED PROTEINS 65-1); microtubule binding | chr5:22402716-22405182 FORWARDhighly similar to ( 834) loc\_os06g40840 12006.m08619 protein microtubule-associated protein MAP65-1a, putative, expressed seq=cds; coord=6:99761240..99767447:-1; parent\_gene=GRMZM2G112337'

'weakly similar to ( 110) AT1G55360 | Symbols: | unknown protein | chr1:20666526-20668502 REVERSEmoderately similar to ( 261) loc\_os06g45920 12006.m09120 protein ZmEBE-1 protein, putative seq=cds; coord=6:108857961..108860755:1; parent\_gene=GRMZM2G167733'

'highly similar to ( 711) AT2G33770 | Symbols: UBC24, ATUBC24, PHO2 | PHO2 (PHOSPHATE 2); ubiquitin-protein ligase | chr2:14277785-14281482 REVERSEnearly identical (1309) loc\_os05g48390 12005.m08910 protein ubiquitin conjugating enzyme, putative, expressed seq=cds; coord=6:163843112..163847600:-1; parent\_gene=GRMZM2G381709'

'moderately similar to ( 486) AT5G19580 | Symbols: | glyoxal oxidase-related | chr5:6607595-6609517 REVERSEhighly similar to ( 895) loc\_os05g48520 12005.m08923 protein glyoxal oxidase, putative, expressed seq=cds; coord=6:164181429..164183918:1; parent\_gene=GRMZM2G458607'

'highly similar to ( 580) AT1G75220 | Symbols: | integral membrane protein, putative | chr1:28229412-28232606 REVERSEweakly similar to ( 164) STC\_RICCO Sugar carrier protein C - Ricinus communis (Castor bean)highly similar to ( 710) loc\_os05g49270 12005.m08997 protein solute carrier family 2, facilitated glucose transporter member 8, putative, expressed seq=cds; coord=6:165151948..165157662:1; parent\_gene=GRMZM2G160430'

'weakly similar to ( 150) AT5G28050 | Symbols: | cytidine/deoxycytidylate deaminase family protein | chr5:10044209-10045484 REVERSEweakly similar to ( 161) loc\_os07g14150 12007.m079579 protein cytidine/deoxycytidylate deaminase family protein, putative, expressed seq=cds; coord=7:24368445..24370041:1; parent\_gene=GRMZM2G173063'

'moderately similar to ( 406) AT3G02875 | Symbols: ILR1 | ILR1 (IAA-LEUCINE RESISTANT 1); IAA-Leu conjugat hydrolase/ IAA-Phe conjugate hydrolase/ metallopeptidase | chr3:631993-633859 FORWARDhighly similar to ( 558) loc\_os07g14590 12007.m05904 protein IAA-amino acid hydrolase ILR1 precursor, putative, expressed seq=cds; coord=7:25812344..25817942:1; parent\_gene=GRMZM2G003789'

'moderately similar to ( 464) AT3G02875 | Symbols: ILR1 | ILR1 (IAA-LEUCINE RESISTANT 1); IAA-Leu conjugat hydrolase/ IAA-Phe conjugate hydrolase/ metallopeptidase | chr3:631993-633859 FORWARDhighly similar to ( 640) loc\_os07g14590 12007.m05904 protein IAA-amino acid hydrolase ILR1 precursor, putative, expressed seq=cds; coord=7:25903581..25911265:1; parent\_gene=GRMZM2G016958'



'highly similar to ( 630) AT2G38940 | Symbols: ATPT2, PHT1;4 | ATPT2 (ARABIDOPSIS THALIANA PHOSPHATE TRANSPORTER 2); carbohydrate transmembrane transporter/ inorganic phosphate transmembrane transporter/ phosphate transmembrane transporter/ sugar:hydrogen symporter | chr2:16258500-16260104 FORWARDhighly similar to ( 649) loc\_os04g10750 12004.m101431 protein inorganic phosphate transporter 1-5, putative, expressed seq=cds; coord=7:34925082..34926916:-1; parent\_gene=GRMZM2G139639'

'nearly identical (1162) AT3G13380 | Symbols: BRL3 | BRL3 (BRI1-LIKE 3); ATP binding / protein binding / protein kinase/ protein serine/threonine kinase | chr3:4347240-4350734 FORWARDmoderately similar to ( 456) PSKR\_DAUCA Phytosulfokine receptor precursor (EC 2.7.11.1) (Phytosulfokine LRR receptor kinase) - Daucus carota (Carrot)nearly identical (1795) loc\_os09g12240 12009.m04486 protein serine/threonine-protein kinase BRI1-like 1 precursor, putative, expressed seq=cds; coord=7:79095632..79100094:-1; parent\_gene=GRMZM2G092604'

'weakly similar to ( 161) AT1G56340 | Symbols: CRT1 | CRT1 (CALRETICULIN 1); calcium ion binding / unfolded protein binding | chr1:21090022-21092630 REVERSEweakly similar to ( 193) CALR\_MAIZE Calreticulin precursor - Zea mays (Maize)weakly similar to ( 189) loc\_os07g14270 12007.m29118 protein calreticulin precursor, putative, expressed seq=cds; coord=7:93853570..93863210:1; parent\_gene=GRMZM2G140949'

'weakly similar to ( 160) AT3G26230 | Symbols: CYP71B24 | CYP71B24; electron carrier/ heme binding / iron ion binding / monooxygenase/ oxygen binding | chr3:9598200-9599892 REVERSEweakly similar to ( 191) C71D8\_SOYBN Cytochrome P450 71D8 (EC 1.14.-.-) (P450 CP7) - Glycine max (Soybean)moderately similar to ( 232) loc\_os09g36080 12009.m06558 protein cytochrome P450 71A2, putative, expressed seq=cds; coord=7:94644611..94646428:1; parent\_gene=GRMZM2G027041'

'weakly similar to ( 121) AT5G51720 | Symbols: | unknown protein | chr5:21009645-21010227 FORWARDweakly similar to ( 132) loc\_os07g28400 12007.m07112 protein kinesin like protein, putative, expressed seq=cds; coord=7:144904996..144907474:-1; parent\_gene=GRMZM2G046186'

'moderately similar to ( 290) AT3G14470 | Symbols: | disease resistance protein (NBS-LRR class), putative | chr3:4857940-4861104 FORWARDnearly identical (1321) loc\_os07g29820 12007.m07253 protein NBS-LRR disease resistance protein, putative, expressed seq=cds; coord=7:148734857..148747797:-1; parent\_gene=GRMZM2G028713'

'highly similar to ( 711) AT4G27290 | Symbols: | ATP binding / protein kinase/ protein serine/threonine kinase/ protein tyrosine kinase/ sugar binding | chr4:13666281-13669202 FORWARDmoderately similar to ( 351) SLSG3\_BRAOL S-locus-specific glycoprotein S13 precursor (SLSG-13) (Fragment) - Brassica oleracea (Wild cabbage)nearly identical (1172) loc\_os07g36544 12007.m07905 protein serine/threonine-protein kinase receptor precursor, putative, expressed seq=cds; coord=7:156111748..156116073:-1; parent\_gene=GRMZM2G465999'

'moderately similar to ( 241) AT3G15510 | Symbols: ATNAC2, ANAC056, NARS1 | ATNAC2 (ARABIDOPSIS NAC DOMAIN CONTAINING PROTEIN 2); transcription factor | chr3:5243696-5245037 FORWARDmoderately similar to ( 229) NAC48\_ORYSA NAC domain-containing protein 48 (ONAC048) - Oryza sativa (Rice)moderately similar to ( 406) loc\_os07g48450 12007.m29337 protein NAC domain-containing protein 18, putative, expressed seq=cds; coord=7:173514759..173517298:-1; parent\_gene=GRMZM2G430849'

'moderately similar to ( 295) PRR37\_ORYSA Two-component response regulator-like PRR37 (Pseudo-response regulator 37) (OsPRR37) - Oryza sativa (Rice)moderately similar to ( 295) loc\_os07g49460 12007.m079806 protein two-component response regulator-like PRR37, putative, expressed seq=cds; coord=7:174982376..174985250:1; parent\_gene=GRMZM2G005732'

'moderately similar to ( 379) AT3G14470 | Symbols: | disease resistance protein (NBS-LRR class), putative | chr3:4857940-4861104 FORWARDnearly identical (1194) loc\_os05g34220 12005.m27824 protein disease resistance protein, putative, expressed seq=cds; coord=8:104460886..104464505:-1; parent\_gene=GRMZM2G047152'

'moderately similar to ( 310) AT2G40280 | Symbols: | dehydration-responsive family protein | chr2:16825707-16828300 REVERSEmoderately similar to ( 459) loc\_os05g39520 12005.m08130 protein ankyrin-like protein, putative, expressed seq=cds; coord=8:118529129..118653539:-1; parent\_gene=AC204277.3\_FG006'

'moderately similar to ( 266) AT1G07840 | Symbols: | leucine zipper factor-related | chr1:2424603-2426131 FORWARDmoderately similar to ( 378) loc\_os01g68310 12001.m12933 protein expressed protein seq=cds; coord=8:162963891..162967617:1; parent\_gene=GRMZM2G001088'

'very weakly similar to (87.0) HD2C\_MAIZE Histone deacetylase 2c (HD2c) (Zm-HD2c) - Zea mays (Maize)very weakly similar to (87.4) loc\_os05g51830 12005.m09245 protein histone deacetylase 2b, putative, expressed seq=cds; coord=8:163180384..163182820:1; parent\_gene=AC183950.2\_FG003'

'very weakly similar to (87.0) HD2C\_MAIZE Histone deacetylase 2c (HD2c) (Zm-HD2c) - Zea mays (Maize)very weakly similar to (87.4) loc\_os05g51830 12005.m09245 protein histone deacetylase 2b, putative, expressed seq=cds; coord=8:163180384..163182820:1; parent\_gene=AC183950.2\_FG003'

'very weakly similar to (87.0) HD2C\_MAIZE Histone deacetylase 2c (HD2c) (Zm-HD2c) - Zea mays (Maize)very weakly similar to (87.4) loc\_os05g51830 12005.m09245 protein histone deacetylase 2b, putative, expressed seq=cds; coord=8:163180384..163182820:1; parent\_gene=AC183950.2\_FG003'

'highly similar to ( 550) AT5G53350 | Symbols: CLPX | CLPX; ATP binding / ATPase/ nucleoside-triphosphatase/ nucleotide binding / protein binding | chr5:21644060-21647503 FORWARDhighly similar to ( 840) loc\_os01g66330 12001.m12741 protein ATP-dependent Clp protease ATP-binding subunit clpX, putative, expressed seq=cds; coord=8:164810797..164816886:1; parent\_gene=GRMZM2G172829'

'weakly similar to ( 192) AT2G23620 | Symbols: ATMES1, MES1 | MES1 (METHYL ESTERASE 1); hydrolase, acting on ester bonds / methyl indole-3-acetate esterase/ methyl jasmonate esterase/ methyl salicylate esterase | chr2:10047462-10049248 REVERSEweakly similar to ( 173) PIR7A\_ORYSA Probable esterase PIR7A (EC 3.1.-.-) - Oryza sativa (Rice)moderately similar to ( 357) loc\_os01g57770 12001.m11926 protein polyneuridine-aldehyde esterase precursor, putative, expressed seq=cds; coord=8:171784918..171786870:-1; parent\_gene=GRMZM2G440003'

'weakly similar to ( 192) AT2G23620 | Symbols: ATMES1, MES1 | MES1 (METHYL ESTERASE 1); hydrolase, acting on ester bonds / methyl indole-3-acetate esterase/ methyl jasmonate esterase/ methyl salicylate esterase | chr2:10047462-10049248 REVERSEweakly similar to ( 173) PIR7A\_ORYSA Probable esterase PIR7A (EC 3.1.-.-) - Oryza sativa (Rice)moderately similar to ( 357) loc\_os01g57770 12001.m11926 protein polyneuridine-aldehyde esterase precursor, putative, expressed seq=cds; coord=8:171784918..171786870:-1; parent\_gene=GRMZM2G440003'

'weakly similar to ( 192) AT2G23620 | Symbols: ATMES1, MES1 | MES1 (METHYL ESTERASE 1); hydrolase, acting on ester bonds / methyl indole-3-acetate esterase/ methyl jasmonate esterase/ methyl salicylate esterase | chr2:10047462-10049248 REVERSEweakly similar to ( 173) PIR7A\_ORYSA Probable esterase PIR7A (EC 3.1.-.-) - Oryza sativa (Rice)moderately similar to ( 357) loc\_os01g57770 12001.m11926 protein polyneuridine-aldehyde esterase precursor, putative, expressed seq=cds; coord=8:171784918..171786870:-1; parent\_gene=GRMZM2G440003'

'highly similar to ( 505) AT5G65090 | Symbols: MRH3, BST1, DER4 | BST1 (BRISTLED 1); hydrolase/ inositol or phosphatidylinositol phosphatase | chr5:26004837-26006656 FORWARDhighly similar to ( 706) loc\_os06g11920 12006.m05909 protein hydrolase/ inositol or phosphatidylinositol phosphatase, putative, expressed seq=cds; coord=9:6006293..6008457:-1; parent\_gene=GRMZM2G093772'

'weakly similar to ( 109) AT1G28210 | Symbols: ATJ1 | ATJ1; heat shock protein binding / nucleic acid binding / unfolded protein binding / zinc ion binding | chr1:9854598-9859977 FORWARDweakly similar to ( 149) loc\_os06g11440 12006.m32015 protein transposon protein, putative, Mutator sub-class, expressed seq=cds; coord=9:6826102..6839564:-1; parent\_gene=GRMZM2G097620'

'nearly identical (1504) AT5G65460 | Symbols: | kinesin motor protein-related | chr5:26161831-26169001 REVERSEweakly similar to ( 138) FLA10\_CHLRE Kinesin-like protein FLA10 (Protein KHP1) - Chlamydomonas reinhardtiihighly similar to ( 894) loc\_os06g11380 12006.m05855 protein ATP binding protein, putative, expressed seq=cds; coord=9:7186959..7210629:-1; parent\_gene=GRMZM2G017257'

'nearly identical (1504) AT5G65460 | Symbols: | kinesin motor protein-related | chr5:26161831-26169001 REVERSEweakly similar to ( 138) FLA10\_CHLRE Kinesin-like protein FLA10 (Protein KHP1) - Chlamydomonas reinhardtiihighly similar to ( 894) loc\_os06g11380 12006.m05855 protein ATP binding protein, putative, expressed seq=cds; coord=9:7186959..7210629:-1; parent\_gene=GRMZM2G017257'

'moderately similar to ( 255) AT1G06620 | Symbols: | 2-oxoglutarate-dependent dioxygenase, putative | chr1:2025618-2027094 FORWARDmoderately similar to ( 217) DV4H\_CATRO Desacetoxyvindoline 4-hydroxylase (EC 1.14.11.20) - Catharanthus roseus (Rosy periwinkle) (Madagascar periwinkle)moderately similar to ( 290) loc\_os03g48430 12003.m09851 protein 1-aminocyclopropane-1-carboxylate oxidase, putative, expressed seq=cds; coord=9:8469357..8471020:1; parent\_gene=GRMZM2G066358'

'moderately similar to ( 328) AT1G21890 | Symbols: | nodulin MtN21 family protein | chr1:7682808-7685581 REVERSEmoderately similar to ( 478) loc\_os06g10750 12006.m05792 protein nodulin protein, putative, expressed seq=cds; coord=9:8432717..8434846:-1; parent\_gene=GRMZM2G088053'

'moderately similar to ( 462) AT5G20070 | Symbols: ATNUDT19, ATNUDX19 | ATNUDX19 (ARABIDOPSIS THALIANA NUDIX HYDROLASE HOMOLOG 19); hydrolase/ metal ion binding | chr5:6779893-6782308 FORWARDhighly similar to ( 622) loc\_os06g04910 12006.m05220 protein hydrolase, NUDIX family protein, expressed seq=cds; coord=9:20740530..20746313:1; parent\_gene=GRMZM2G404897'

'moderately similar to ( 462) AT5G20070 | Symbols: ATNUDT19, ATNUDX19 | ATNUDX19 (ARABIDOPSIS THALIANA NUDIX HYDROLASE HOMOLOG 19); hydrolase/ metal ion binding | chr5:6779893-6782308 FORWARDhighly similar to ( 622) loc\_os06g04910 12006.m05220 protein hydrolase, NUDIX family protein, expressed seq=cds; coord=9:20740530..20746313:1; parent\_gene=GRMZM2G404897'

'moderately similar to ( 362) AT5G61520 | Symbols: | hexose transporter, putative | chr5:24739358-24740833 REVERSEmoderately similar to ( 432) HEX6\_RICCO Hexose carrier protein HEX6 - Ricinus communis (Castor bean)highly similar to ( 507) loc\_os06g04900 12006.m05219 protein hexose carrier protein HEX6, putative, expressed seq=cds; coord=9:20747007..20749031:1; parent\_gene=GRMZM2G404965'

'moderately similar to ( 311) AT2G22240 | Symbols: ATMIPS2, MIPS2 | MIPS2 (MYO-INOSITOL-1-PHOSPHATE SYNTHASE 2); binding / catalytic/ inositol-3-phosphate synthase | chr2:9451901-9453375 REVERSEmoderately similar to ( 324) INO1\_MAIZE Inositol-3-phosphate synthase (EC 5.5.1.4) (Myo-inositol-1-phosphate synthase) (MI-1-P synthase) (IPS) - Zea mays (Maize)moderately similar to ( 318) loc\_os03g09250 12003.m35064 protein inositol-3-phosphate synthase, putative, expressed seq=cds; coord=9:23062831..23063984:-1; parent\_gene=GRMZM2G010768'

'weakly similar to ( 166) AT5G20150 | Symbols: ATSPX1, SPX1 | SPX1 (SPX DOMAIN GENE 1) | chr5:6802429-6803367 FORWARDmoderately similar to ( 211) loc\_os06g40120 12006.m08548 protein IDS4-like protein, putative, expressed seq=cds; coord=9:89392972..89394125:-1; parent\_gene=GRMZM2G083655'

'weakly similar to ( 191) AT1G02170 | Symbols: LOL3, ATMCPB1, MCP1B, AMC1, ATMC1 | AMC1 (METACASPASE 1); cysteine-type endopeptidase | chr1:411883-413426 FORWARDmoderately similar to ( 276) loc\_os03g27120 12003.m08043 protein LOL3, putative, expressed seq=cds; coord=9:120365364..120366799:-1; parent\_gene=GRMZM2G132238'

'weakly similar to ( 191) AT1G02170 | Symbols: LOL3, ATMCPB1, MCP1B, AMC1, ATMC1 | AMC1 (METACASPASE 1); cysteine-type endopeptidase | chr1:411883-413426 FORWARDmoderately similar to ( 276) loc\_os03g27120 12003.m08043 protein LOL3, putative, expressed seq=cds; coord=9:120365364..120366799:-1; parent\_gene=GRMZM2G132238'

'weakly similar to ( 103) AT5G18800 | Symbols: | NADH-ubiquinone oxidoreductase 19 kDa subunit (NDUFA8) family protein | chr5:6267304-6268393 FORWARDweakly similar to ( 124) loc\_os03g18420 12003.m07265 protein NADH-ubiquinone oxidoreductase 19 kDa subunit, putative, expressed seq=cds; coord=9:137344168..137344612:-1; parent\_gene=AC206223.3\_FG010'

'moderately similar to ( 304) AT1G07540 | Symbols: TRFL2 | TRFL2 (TRF-LIKE 2); DNA binding | chr1:2318433-2321048 REVERSEhighly similar to ( 901) loc\_os03g16700 12003.m101292 protein initiator-binding protein, putative, expressed seq=cds; coord=9:139744606..139748920:-1; parent\_gene=GRMZM2G063151'

'weakly similar to ( 130) AT3G62030 | Symbols: ROC4 | peptidyl-prolyl cis-trans isomerase, chloroplast / cyclophilin / rotamase / cyclosporin A-binding protein (ROC4) | chr3:22973004-22975139 FORWARDweakly similar to ( 118) CYPB\_VICFA Peptidyl-prolyl cis-trans isomerase, chloroplast precursor (EC 5.2.1.8) (PPIase) (Rotamase) (Cyclophilin) (Cyclosporin A-binding protein) (CYP B) - Vicia faba (Broad bean)weakly similar to ( 150) loc\_os01g18210 12001.m08363 protein peptidyl-prolyl cis-trans isomerase, chloroplast precursor, putative, expressed seq=cds; coord=9:145151242..145156208:-1; parent\_gene=GRMZM2G393515'

'nearly identical (1120) AT1G76140 | Symbols: | serine-type endopeptidase/ serine-type peptidase | chr1:28571187-28574852 FORWARDnearly identical (1320) loc\_os01g01830 12001.m06826 protein prolyl endopeptidase, putative, expressed seq=cds; coord=10:18333983..18347671:-1; parent\_gene=GRMZM2G015238'

'highly similar to ( 863) AT5G13110 | Symbols: G6PD2 | G6PD2 (GLUCOSE-6-PHOSPHATE DEHYDROGENASE 2); glucose-6-phosphate dehydrogenase | chr5:4158952-4161640 FORWARDhighly similar to ( 862) G6PDC\_TOBAC Glucose-6-phosphate 1-dehydrogenase, chloroplast precursor (EC 1.1.1.49) (G6PD) - Nicotiana tabacum (Common tobacco)highly similar to ( 993) loc\_os07g22350 12007.m06520 protein glucose-6-phosphate 1-dehydrogenase 2, chloroplast precursor, putative, expressed seq=cds; coord=10:99364726..99371326:1; parent\_gene=GRMZM2G177077'

'weakly similar to ( 132) AT5G66160 | Symbols: ATRMR1, RMR1 | JR700; peptidase/ protein binding / zinc ion binding | chr5:26445198-26446878 FORWARDweakly similar to ( 130) loc\_os03g07130 12003.m101101 protein RING finger protein 13, putative, expressed seq=cds; coord=10:102285674..102287561:-1; parent\_gene=GRMZM2G035899'

'weakly similar to ( 115) AT2G21045 | Symbols: | INVOLVED IN: aging; EXPRESSED IN: hypocotyl, root; CONTAINS InterPro DOMAIN/s: Rhodanese-like (InterPro:IPR001763); BEST Arabidopsis thaliana protein match is: unknown protein (TAIR:AT5G66170.2); Has 1919 Blast hits to 1917 proteins in 542 species: Archae - 34; Bacteria - 1258; Metazoa - 17; Fungi - 21; Plants - 115; Viruses - 0; Other Eukaryotes - 474 (source: NCBI BLINK). | chr2:9027858-9028805 FORWARDweakly similar to ( 102) DIN1\_RAPSA Senescence-associated protein DIN1 - Raphanus sativus (Radish)weakly similar to ( 173) loc\_os04g17660 12004.m35123 protein senescence-associated protein DIN1, putative, expressed seq=cds; coord=10:102318701..102320375:-1; parent\_gene=AC204711.3\_FG003'

'weakly similar to ( 171) AT3G14075 | Symbols: | lipase class 3 family protein | chr3:4663819-4666338 REVERSEmoderately similar to ( 220) loc\_os02g54010 12002.m10430 protein triacylglycerol lipase, putative, expressed seq=cds; coord=10:111437426..111441085:1; parent\_gene=GRMZM2G153232'

'moderately similar to ( 313) AT4G30270 | Symbols: MERI5B, MERI-5, SEN4 | MERI5B (meristem-5); hydrolase, acting on glycosyl bonds / xyloglucan:xyloglucosyl transferase | chr4:14819445-14820448 REVERSEmoderately similar to ( 300) BRU1\_SOYBN Brassinosteroid-regulated protein BRU1 precursor - Glycine max (Soybean)moderately similar to ( 436) loc\_os04g51460 12004.m10042 protein xyloglucan endotransglucosylase/hydrolase protein 15 precursor, putative, expressed seq=cds; coord=10:141234026..141235309:1; parent\_gene=GRMZM2G142857'

'moderately similar to ( 319) AT1G63270 | Symbols: ATNAP10 | ATNAP10; transporter | chr1:23469664-23470353 REVERSEmoderately similar to ( 358) loc\_os04g53550 12004.m10248 protein cytochrome c biogenesis ATP-binding export protein ccmA-like, putative seq=cds; coord=10:143421871..143422992:-1; parent\_gene=GRMZM2G148492'

'weakly similar to ( 160) AT3G53160 | Symbols: UGT73C7 | UGT73C7 (UDP-glucosyl transferase 73C7); UDP-glycosyltransferase/ transferase, transferring glycosyl groups | chr3:19702485-19703957 REVERSEweakly similar to ( 126) ZOX\_PHAVU Zeatin O-xylosyltransferase (EC 2.4.2.40) (Zeatin O-beta-D-xylosyltransferase) - Phaseolus vulgaris (Kidney bean) (French bean)moderately similar to ( 380) loc\_os03g46400 12003.m09658 protein flavonol-3-O-glycoside-7-O-glucosyltransferase 1, putative, expressed seq=cds; coord=10:146643280..146645035:1; parent\_gene=GRMZM2G067424'

'weakly similar to ( 198) AT5G03500 | Symbols: | transcription coactivator | chr5:876673-877660 REVERSEmoderately similar to ( 253) loc\_os04g56640 12004.m35500 protein cofactor required for Sp1 transcriptional activation subunit 9, putative, expressed seq=cds; coord=10:146675877..146677777:-1; parent\_gene=GRMZM2G066981'

'very weakly similar to (97.8) AT3G61310 | Symbols: | DNA-binding family protein | chr3:22690799-22692445 REVERSEmoderately similar to ( 326) loc\_os04g58730 12004.m35526 protein DNA binding protein, putative, expressed seq=cds; coord=10:148640860..148643787:-1; parent\_gene=GRMZM2G074107'

'moderately similar to ( 253) AT1G49180 | Symbols: | protein kinase family protein | chr1:18184840-18187444 REVERSEweakly similar to ( 128) CDPK\_DAUCA Calcium-dependent protein kinase (EC 2.7.11.1) (CDPK) - Daucus carota (Carrot)moderately similar to ( 409) loc\_os04g58990 12004.m10777 protein MAP/microtubule affinity-regulating kinase 4, putative, expressed seq=cds; coord=10:148972118..148974136:-1; parent\_gene=GRMZM2G104658'

'moderately similar to ( 253) AT1G49180 | Symbols: | protein kinase family protein | chr1:18184840-18187444 REVERSEweakly similar to ( 128) CDPK\_DAUCA Calcium-dependent protein kinase (EC 2.7.11.1) (CDPK) - Daucus carota (Carrot)moderately similar to ( 409) loc\_os04g58990 12004.m10777 protein MAP/microtubule affinity-regulating kinase 4, putative, expressed seq=cds; coord=10:148972118..148974136:-1; parent\_gene=GRMZM2G104658'

'moderately similar to ( 494) AT2G46950 | Symbols: CYP709B2 | CYP709B2; electron carrier/ heme binding / iron ion binding / monooxygenase/ oxygen binding | chr2:19289466-19291541 REVERSEmoderately similar to ( 365) C72A1\_CATRO Cytochrome P450 72A1 (EC 1.3.3.9) (CYPLXXII) (Secologanin synthase) (SLS) - Catharanthus roseus (Rosy periwinkle) (Madagascar periwinkle)highly similar to ( 694) loc\_os03g25480 12003.m07897 protein cytochrome P450 72A1, putative, expressed seq=cds; coord=1:64079848..64082498:1; parent\_gene=GRMZM2G459563'

'nearly identical (1603) AT3G14270 | Symbols: | phosphatidylinositol-4-phosphate 5-kinase family protein | chr3:4754624-4761185 FORWARDnearly identical (2592) loc\_os03g28140 12003.m08138 protein 1-phosphatidylinositol-4-phosphate 5-kinase/ zinc ion binding protein, putative, expressed seq=cds; coord=1:69541657..69552704:-1; parent\_gene=GRMZM2G111208'

'highly similar to ( 829) AT5G35790 | Symbols: G6PD1 | G6PD1 (GLUCOSE-6-PHOSPHATE DEHYDROGENASE 1); glucose-6-phosphate dehydrogenase | chr5:13956879-13959686 REVERSEhighly similar to ( 838) G6PDC\_SOLTU Glucose-6-phosphate 1-dehydrogenase, chloroplast precursor (EC 1.1.1.49) (G6PD) - Solanum tuberosum (Potato)highly similar to ( 895) loc\_os03g29950 12003.m35274 protein glucose-6-phosphate 1-dehydrogenase, chloroplast precursor, putative, expressed seq=cds; coord=1:72093978..72113326:1; parent\_gene=GRMZM2G179521'

'highly similar to ( 546) AT1G69040 | Symbols: ACR4 | ACR4 (ACT REPEAT 4); amino acid binding | chr1:25957843-25960079 FORWARDhighly similar to ( 662) loc\_os03g29980 12003.m34884 protein ACR4, putative, expressed seq=cds; coord=1:72701780..72704900:1; parent\_gene=GRMZM2G096682'

'very weakly similar to (95.9) AT2G35930 | Symbols: PUB23 | PUB23 (PLANT U-BOX 23); ubiquitin-protein ligase | chr2:15083101-15084336 REVERSEmoderately similar to ( 291) loc\_os10g03440 12010.m03761 protein avr9/Cf-9 rapidly elicited protein 74, putative seq=cds; coord=1:115218400..115219880:1; parent\_gene=GRMZM2G069070'

'moderately similar to ( 395) AT2G16370 | Symbols: THY-1 | THY-1 (THYMIDYLATE SYNTHASE 1); dihydrofolate reductase/ thymidylate synthase | chr2:7082038-7084333 REVERSEhighly similar to ( 543) DRTS\_MAIZE Bifunctional dihydrofolate reductase-thymidylate synthase (DHFR-TS) [Includes: Dihydrofolate reductase (EC 1.5.1.3); Thymidylate synthase (EC 2.1.1.45)] - Zea mays (Maize)moderately similar to ( 489) loc\_os1g29390 12011.m06849 protein bifunctional dihydrofolate reductase-thymidylate synthase, putative, expressed seq=cds; coord=1:127019050..127023309:-1; parent\_gene=GRMZM2G421493'

'moderately similar to ( 283) AT5G54000 | Symbols: | oxidoreductase, 2OG-Fe(II) oxygenase family protein | chr5:21917776-21919064 REVERSEweakly similar to ( 186) FLS\_PETHY Flavonol synthase/flavanone 3-hydroxylase (EC 1.14.11.23) (EC 1.14.11.9) (FLS) - Petunia hybrida (Petunia)moderately similar to ( 464) loc\_os02g17940 12002.m100171 protein leucoanthocyanidin dioxygenase, putative, expressed seq=cds; coord=1:140918675..140920524:1; parent\_gene=GRMZM2G162158'

'moderately similar to ( 231) AT5G57040 | Symbols: | lactoylglutathione lyase family protein / glyoxalase I family protein | chr5:23084035-23085116 REVERSEmoderately similar to ( 268) loc\_os07g06660 12007.m29075 protein glyoxalase/bleomycin resistance protein/dioxygenase, putative, expressed seq=cds; coord=1:179641676..179643591:-1; parent\_gene=GRMZM2G067028'

'highly similar to ( 787) AT4G07960 | Symbols: ATCSLC12, CSLC12 | ATCSLC12 (CELLULOSE-SYNTHASE LIKE C12); cellulose synthase/ transferase, transferring glycosyl groups | chr4:4802628-4805114 REVERSEhighly similar to ( 862) loc\_os07g03260 12007.m04797 protein CSLC10 - cellulose synthase-like family C seq=cds; coord=1:281644459..281648331:-1; parent\_gene=GRMZM2G028286'

'very weakly similar to (88.2) AT2G31200 | Symbols: ADF6, ATADF6 | ADF6 (ACTIN DEPOLYMERIZING FACTOR 6); actin binding | chr2:13294171-13294948 FORWARDvery weakly similar to (87.4) ADF\_VITVI Actin-depolymerizing factor (ADF) - Vitis vinifera (Grape)very weakly similar to ( 100) loc\_os03g56790 12003.m10595 protein actin-depolymerizing factor 6, putative, expressed seq=cds; coord=1:284469074..284477533:1; parent\_gene=GRMZM2G568484'

'very weakly similar to (88.2) AT2G31200 | Symbols: ADF6, ATADF6 | ADF6 (ACTIN DEPOLYMERIZING FACTOR 6); actin binding | chr2:13294171-13294948 FORWARDvery weakly similar to (87.4) ADF\_VITVI Actin-depolymerizing factor (ADF) - Vitis vinifera (Grape)very weakly similar to ( 100) loc\_os03g56790 12003.m10595 protein actin-depolymerizing factor 6, putative, expressed seq=cds; coord=1:284469074..284477533:1; parent\_gene=GRMZM2G568484'

'very weakly similar to (88.2) AT2G31200 | Symbols: ADF6, ATADF6 | ADF6 (ACTIN DEPOLYMERIZING FACTOR 6); actin binding | chr2:13294171-13294948 FORWARDvery weakly similar to (87.4) ADF\_VITVI Actin-depolymerizing factor (ADF) - Vitis vinifera (Grape)very weakly similar to ( 100) loc\_os03g56790 12003.m10595 protein actin-depolymerizing factor 6, putative, expressed seq=cds; coord=1:284469074..284477533:1; parent\_gene=GRMZM2G568484'

'highly similar to ( 700) AT5G63890 | Symbols: ATHDH | ATHDH (HISTIDINOL DEHYDROGENASE); histidinol dehydrogenase | chr5:25565600-25568104 REVERSEhighly similar to ( 788) HISX\_ORYSA Histidinol dehydrogenase, chloroplast precursor (EC 1.1.1.23) (HDH) - Oryza sativa (Rice)highly similar to ( 788) loc\_os01g13190 12001.m07929 protein histidinol dehydrogenase, chloroplast precursor, putative, expressed seq=cds; coord=1:285124791..285129572:-1; parent\_gene=GRMZM2G058584'

'seq=cds; coord=2:1954640..1955535:1; parent\_gene=GRMZM2G068202'

'moderately similar to ( 388) AT1G15820 | Symbols: LHCB6, CP24 | LHCB6 (LIGHT HARVESTING COMPLEX PSII SUBUNIT 6); chlorophyll binding | chr1:5446685-5447676 REVERSEmoderately similar to ( 388) CB4\_SPIOL Chlorophyll a-b binding protein CP24, chloroplast precursor - Spinacia oleracea (Spinach)moderately similar to ( 405) loc\_os04g38410 12004.m08831 protein chlorophyll a-b binding protein CP24, chloroplast precursor, putative, expressed seq=cds; coord=2:2018212..2019764:-1; parent\_gene=GRMZM2G039996'

'weakly similar to ( 135) AT3G48100 | Symbols: ARR5, ATRR2, IBC6 | ARR5 (ARABIDOPSIS RESPONSE REGULATOR 5); transcription regulator/ two-component response regulator | chr3:17759112-17760740 REVERSEweakly similar to ( 189) loc\_os04g57720 12004.m10657 protein OsRR6 - Rice type-A response regulator, expressed seq=cds; coord=2:2081848..2082630:-1; parent\_gene=GRMZM2G040736'

'weakly similar to ( 194) AT5G06800 | Symbols: | myb family transcription factor | chr5:2103374-2105680 FORWARDmoderately similar to ( 384) loc\_os04g56990 12004.m101684 protein transfactor, putative, expressed seq=cds; coord=2:3105844..3108209:1; parent\_gene=GRMZM2G035370'

'very weakly similar to ( 100) FTRV\_MAIZE Ferredoxin-thioredoxin reductase, variable chain (FTR-V) (Ferredoxin-thioredoxin reductase subunit A) (FTR-A) - Zea mays (Maize)weakly similar to ( 122) loc\_os04g44650 12004.m09424 protein ferredoxin-thioredoxin reductase, variable chain, putative, expressed seq=cds; coord=2:23767850..23771398:1; parent\_gene=GRMZM2G026656'

'highly similar to ( 992) AT1G17840 | Symbols: WBC11, ABCG11, DSO, COF1, ATWBC11 | WBC11 (WHITE-BROWN COMPLEX HOMOLOG PROTEIN 11); ATPase, coupled to transmembrane movement of substances / fatty acid transporter | chr1:6142870-6145894 FORWARDweakly similar to ( 164) PDR4\_ORYSA Pleiotropic drug resistance protein 4 - Oryza sativa (Rice)nearly identical (1204) loc\_os04g44610 12004.m09420 protein ABC transporter C05D10.3 in chromosome III, putative, expressed seq=cds; coord=2:23874520..23879770:-1; parent\_gene=GRMZM2G177812'

'highly similar to ( 640) AT3G15130 | Symbols: | pentatricopeptide (PPR) repeat-containing protein | chr3:5097153-5099222 REVERSEweakly similar to ( 104) RF1\_ORYSA Rf1 protein, mitochondrial precursor (PPR protein) (Fertility restorer) (Restorer for CMS) - Oryza sativa (Rice)highly similar to ( 998) loc\_os04g58980 12004.m10776 protein EMB2261, putative, expressed seq=cds; coord=2:24360634..24363095:1; parent\_gene=GRMZM2G447090'

'highly similar to ( 640) AT3G15130 | Symbols: | pentatricopeptide (PPR) repeat-containing protein | chr3:5097153-5099222 REVERSEweakly similar to ( 104) RF1\_ORYSA Rf1 protein, mitochondrial precursor (PPR protein) (Fertility restorer) (Restorer for CMS) - Oryza sativa (Rice)highly similar to ( 998) loc\_os04g58980 12004.m10776 protein EMB2261, putative, expressed seq=cds; coord=2:24360634..24363095:1; parent\_gene=GRMZM2G447090'

'highly similar to ( 712) AT4G24550 | Symbols: | clathrin adaptor complexes medium subunit family protein | chr4:12675873-12678903 FORWARDhighly similar to ( 832) loc\_os07g42810 12007.m29006 protein AP-4 complex subunit mu-1, putative, expressed seq=cds; coord=2:25377862..25389131:-1; parent\_gene=GRMZM2G031360'



'highly similar to ( 712) AT4G24550 | Symbols: | clathrin adaptor complexes medium subunit family protein | chr4:12675873-12678903 FORWARDhighly similar to ( 832) loc\_os07g42810 12007.m29006 protein AP-4 complex subunit mu-1, putative, expressed seq=cds; coord=2:25377862..25389131:-1; parent\_gene=GRMZM2G031360'

'weakly similar to ( 143) AT5G23370 | Symbols: | GRAM domain-containing protein / ABA-responsive protein-related | chr5:7863542-7864201 REVERSEmoderately similar to ( 293) loc\_os04g44500 12004.m09409 protein FIP1, putative, expressed seq=cds; coord=2:26730259..26731532:1; parent\_gene=GRMZM2G413887'

'moderately similar to ( 376) AT3G52210 | Symbols: | mRNA capping enzyme family protein | chr3:19367035-19369293 FORWARDhighly similar to ( 541) MCES2\_ORYSA mRNA cap guanine-N7 methyltransferase 2 (EC 2.1.1.56) (mRNA (guanine-N(7)-)-methyltransferase 2) (mRNA cap methyltransferase 2) - Oryza sativa (Rice)highly similar to ( 541) loc\_os02g54000 12002.m10429 protein S-adenosylmethionine-dependent methyltransferase/ catalytic, putative, expressed seq=cds; coord=2:26771301..26774601:-1; parent\_gene=GRMZM2G171410'

'weakly similar to ( 120) AT1G34580 | Symbols: | monosaccharide transporter, putative | chr1:12660631-12663553 FORWARDvery weakly similar to (92.8) STC\_RICCO Sugar carrier protein C - Ricinus communis (Castor bean)weakly similar to ( 132) loc\_os04g37980 12004.m08787 protein sugar transport protein 5, putative, expressed seq=cds; coord=2:43482588..43483408:-1; parent\_gene=GRMZM2G061495'

'weakly similar to ( 130) AT3G47820 | Symbols: | armadillo/beta-catenin repeat family protein / U-box domain-containing protein | chr3:17644434-17645963 FORWARDmoderately similar to ( 338) loc\_os09g21740 12009.m05381 protein ubiquitin-protein ligase, putative, expressed seq=cds; coord=2:178382551..178384466:-1; parent\_gene=GRMZM2G425965'

'moderately similar to ( 410) loc\_os02g43750 12002.m09409 protein transcription initiation factor, putative, expressed seq=cds; coord=3:13846717..13865900:-1; parent\_gene=GRMZM2G102664'

'seq=cds; coord=3:17605685..17606666:1; parent\_gene=GRMZM2G099340'

'moderately similar to ( 409) AT1G25390 | Symbols: | protein kinase family protein | chr1:8906640-8908800 REVERSEmoderately similar to ( 222) CRI4\_MAIZE Putative receptor protein kinase CRINKLY4 precursor (EC 2.7.11.1) - Zea mays (Maize)highly similar to ( 631) loc\_os01g04409 12001.m07075 protein OsWAK1 - OsWAK receptor-like cytoplasmic kinase (OsWAK-RLCK), expressed seq=cds; coord=3:20399610..20409348:1; parent\_gene=GRMZM2G013790'

'weakly similar to ( 123) AT1G30270 | Symbols: CIPK23, SnRK3.23, ATCIPK23, LKS1 | CIPK23 (CBL-INTERACTING PROTEIN KINASE 23); kinase/ protein binding / protein serine/threonine kinase | chr1:10655270-10658524 FORWARDweakly similar to ( 108) CIPK1\_ORYSA CIPK-like protein 1 (EC 2.7.11.1) (OsCK1) - Oryza sativa (Rice)weakly similar to ( 134) loc\_os07g05620 12007.m29069 protein CIPK-like protein 1, putative, expressed seq=cds; coord=3:28055973..28058891:-1; parent\_gene=GRMZM2G012472'

'highly similar to ( 714) AT1G44446 | Symbols: CH1, ATCAO, CAO | CH1 (CHLORINA 1); chlorophyllide a oxygenase | chr1:16849132-16851152 REVERSEhighly similar to ( 876) CAO\_ORYSA Chlorophyllide a oxygenase, chloroplast precursor (EC 1.13.12.14) (Chlorophyll a oxygenase) (Chlorophyll b synthase) - Oryza sativa (Rice)highly similar to ( 876) loc\_os10g41780 12010.m21805 protein chlorophyllide a oxygenase, chloroplast precursor, putative, expressed seq=cds; coord=3:146605798..146608649:1; parent\_gene=GRMZM2G171390'

'moderately similar to ( 335) AT2G29680 | Symbols: CDC6, ATCDC6 | CDC6 (CELL DIVISION CONTROL 6) | chr2:12689586-12692854 FORWARDhighly similar to ( 549) loc\_os01g63710 12001.m42760 protein cell division control protein 6, putative, expressed seq=cds; coord=3:178059283..178062665:-1; parent\_gene=GRMZM2G007659'

'weakly similar to ( 163) AT5G55340 | Symbols: | long-chain-alcohol O-fatty-acyltransferase family protein / wax synthase family protein | chr5:22439985-22440986 REVERSEmoderately similar to ( 475) loc\_os01g46270 12001.m10825 protein wax synthase isoform 3, putative, expressed seq=cds; coord=3:213797343..213799289:-1; parent\_gene=GRMZM2G349407'

'highly similar to ( 538) AT4G16745 | Symbols: | exostosin family protein | chr4:9412185-9414053 FORWARDhighly similar to ( 709) loc\_os01g45350 12001.m10738 protein limonene cyclase like protein, putative, expressed seq=cds; coord=3:215380332..215382314:-1; parent\_gene=GRMZM2G048010'

'highly similar to ( 538) AT4G16745 | Symbols: | exostosin family protein | chr4:9412185-9414053 FORWARDhighly similar to ( 709) loc\_os01g45350 12001.m10738 protein limonene cyclase like protein, putative, expressed seq=cds; coord=3:215380332..215382314:-1; parent\_gene=GRMZM2G048010'

'moderately similar to ( 260) AT5G14740 | Symbols: CA2, CA18, BETA CA2 | CA2 (CARBONIC ANHYDRASE 2); carbonate dehydratase/ zinc ion binding | chr5:4758257-4762315 FORWARDmoderately similar to ( 338) CAHC\_HORVU Carbonic anhydrase, chloroplast precursor (EC 4.2.1.1) (Carbonate dehydratase) - Hordeum vulgare (Barley)moderately similar to ( 331) loc\_os01g45274 12001.m150428 protein carbonic anhydrase, chloroplast precursor, putative, expressed seq=cds; coord=3:215425032..215437638:-1; parent\_gene=GRMZM2G348512'

'moderately similar to ( 404) AT5G63400 | Symbols: ADK1 | ADK1 (ADENYLATE KINASE 1); ATP binding / adenylate kinase/ nucleobase, nucleoside, nucleotide kinase | chr5:25393502-25394817 REVERSEmoderately similar to ( 439) KAD2\_ORYSA Adenylate kinase B (EC 2.7.4.3) (ATP-AMP transphosphorylase) - Oryza sativa (Rice)moderately similar to ( 439) loc\_os11g20790 12011.m06153 protein adenylate kinase B, putative, expressed seq=cds; coord=3:215654139..215663757:-1; parent\_gene=GRMZM2G125193'

'moderately similar to ( 404) AT5G63400 | Symbols: ADK1 | ADK1 (ADENYLATE KINASE 1); ATP binding / adenylate kinase/ nucleobase, nucleoside, nucleotide kinase | chr5:25393502-25394817 REVERSEmoderately similar to ( 439) KAD2\_ORYSA Adenylate kinase B (EC 2.7.4.3) (ATP-AMP transphosphorylase) - Oryza sativa (Rice)moderately similar to ( 439) loc\_os11g20790 12011.m06153 protein adenylate kinase B, putative, expressed seq=cds; coord=3:215654139..215663757:-1; parent\_gene=GRMZM2G125193'

'weakly similar to ( 147) loc\_os10g24954 12010.m05448 protein ulp1 protease family, C-terminal catalytic domain containing protein seq=cds; coord=3:216932802..216935071:1; parent\_gene=GRMZM2G042332'

'weakly similar to ( 196) AT2G23740 | Symbols: | nucleic acid binding / transcription factor/ zinc ion binding | chr2:10098213-10103229 FORWARDmoderately similar to ( 283) loc\_os02g47900 12002.m09824 protein SET domain protein SDG117, putative, expressed seq=cds; coord=3:217256382..217257668:1; parent\_gene=GRMZM2G702253'

'moderately similar to ( 317) AT1G33440 | Symbols: | proton-dependent oligopeptide transport (POT) family protein | chr1:12127712-12130327 REVERSEmoderately similar to ( 423) loc\_os04g36040 12004.m08693 protein peptide transporter PTR2, putative, expressed seq=cds; coord=4:25983954..25985905:1; parent\_gene=GRMZM2G026459'

'moderately similar to ( 379) AT1G12230 | Symbols: | transaldolase, putative | chr1:4148050-4150708 FORWARDmoderately similar to ( 470) loc\_os08g05830 12008.m80251 protein transaldolase, putative, expressed seq=cds; coord=4:33662889..33690509:1; parent\_gene=GRMZM2G139550'

'weakly similar to ( 148) AT5G54680 | Symbols: ILR3 | ILR3 (iaa-leucine resistant3); DNA binding / transcription factor | chr5:22217270-22218993 FORWARDmoderately similar to ( 307) loc\_os08g04390 12008.m26570 protein bHLH transcription factor, putative, expressed seq=cds; coord=4:35575487..35578048:1; parent\_gene=GRMZM2G017586'

'highly similar to ( 654) AT5G08560 | Symbols: | transducin family protein / WD-40 repeat family protein | chr5:2771104-2773827 REVERSEhighly similar to ( 943) loc\_os02g19210 12002.m07164 protein WD-repeat protein 26, putative, expressed seq=cds; coord=4:36204069..36211034:1; parent\_gene=GRMZM2G111247'

'weakly similar to ( 176) AT1G32410 | Symbols: | vacuolar protein sorting 55 family protein / VPS55 family protein | chr1:11694398-11695297 FORWARDmoderately similar to ( 248) loc\_os02g55980 12002.m10622 protein vacuolar protein sorting 55 containing protein, expressed seq=cds; coord=4:173302471..173307033:1; parent\_gene=GRMZM2G178972'

'moderately similar to ( 343) AT4G08500 | Symbols: MEKK1, ATMEKK1, MAPKKK8, ARAKIN | MEKK1 (MAP KINASE KINASE KINASE 1); DNA binding / MAP kinase kinase/ kinase/ kinase binding / protein binding | chr4:5404272-5407062 REVERSEweakly similar to ( 117) M2K1\_ORYSA Mitogen-activated protein kinase kinase 1 (EC 2.7.12.2) (MAP kinase kinase 1) (MAPKK1) (OsMEK1) - Oryza sativa (Rice)moderately similar to ( 393) loc\_os03g15570 12003.m06994 protein mitogen-activated protein kinase 1, putative, expressed seq=cds; coord=4:178052009..178063510:-1; parent\_gene=GRMZM2G158860'

'moderately similar to ( 399) AT1G77800 | Symbols: | PHD finger family protein | chr1:29253800-29260190 FORWARDhighly similar to ( 842) loc\_os02g52960 12002.m10326 protein PHD-finger family protein, expressed seq=cds; coord=4:178229465..178238103:1; parent\_gene=GRMZM2G475583'

'weakly similar to ( 133) loc\_os02g51300 12002.m10164 protein protein BABY BOOM 2, putative, expressed seq=cds; coord=4:178758748..178760362:-1; parent\_gene=GRMZM2G084457'

'highly similar to ( 510) AT1G12910 | Symbols: ATAN11, LWD1 | ATAN11 (ANTHOCYANIN11); nucleotide binding | chr1:4395114-4396154 REVERSEhighly similar to ( 622) loc\_os02g32430 12002.m08336 protein WD40 repeat protein, putative, expressed seq=cds; coord=5:167430904..167433315:-1; parent\_gene=GRMZM2G099334'

'weakly similar to ( 140) AT5G66320 | Symbols: | zinc finger (GATA type) family protein | chr5:26496208-26497309 REVERSEweakly similar to ( 163) loc\_os02g43150 12002.m100295 protein GATA zinc finger family protein, expressed seq=cds; coord=5:189973035..189975037:1; parent\_gene=GRMZM2G140669'

'highly similar to ( 612) AT1G73660 | Symbols: | protein kinase family protein | chr1:27692247-27696718 REVERSEvery weakly similar to (97.8) PSKR\_DAUCA Phytosulfokine receptor precursor (EC 2.7.11.1) (Phytosulfokine LRR receptor kinase) - Daucus carota (Carrot)nearly identical (1146) loc\_os02g50970 12002.m33450 protein protein kinase domain containing protein, expressed seq=cds; coord=5:206622614..206635150:-1; parent\_gene=GRMZM2G127632'

'highly similar to ( 790) AT1G73590 | Symbols: PIN1, ATPIN1 | PIN1 (PIN-FORMED 1); transporter | chr1:27659772-27662876 FORWARDnearly identical (1019) PIN1\_ORYSA Auxin efflux carrier component 1 (OsPIN1) (Ethylene insensitive root 1 homolog) - Oryza sativa (Rice)nearly identical (1019) loc\_os02g50960 12002.m33866 protein auxin efflux carrier component 1, putative, expressed seq=cds; coord=5:206727149..206730565:1; parent\_gene=GRMZM2G074267'

'highly similar to ( 509) AT3G10350 | Symbols: | anion-transporting ATPase family protein | chr3:3208310-3210678 FORWARDhighly similar to ( 585) loc\_os02g51100 12002.m10144 protein arsenical pump-driving ATPase, putative, expressed seq=cds; coord=5:206910875..206915210:-1; parent\_gene=GRMZM2G105539'

'weakly similar to ( 106) AT1G72230 | Symbols: | plastocyanin-like domain-containing protein | chr1:27188287-27189093 FORWARDweakly similar to ( 116) BCP\_PEA Blue copper protein precursor - Pisum sativum (Garden pea)weakly similar to ( 150) loc\_os02g52180 12002.m10249 protein uclacyanin-2 precursor, putative, expressed seq=cds; coord=5:208891470..208892610:-1; parent\_gene=GRMZM2G045927'

'weakly similar to ( 126) AT5G16650 | Symbols: | DNAJ heat shock N-terminal domain-containing protein | chr5:5463446-5465075 REVERSEmoderately similar to ( 236) loc\_os02g52270 12002.m10258 protein chaperone protein dnaJ, putative, expressed seq=cds; coord=5:209147684..209150734:-1; parent\_gene=GRMZM2G072300'

'weakly similar to ( 138) AT2G24940 | Symbols: AtMAPR2 | AtMAPR2 (Arabidopsis thaliana membrane-associated progesterone binding protein 2); heme binding | chr2:10609447-10609749 FORWARDweakly similar to ( 192) loc\_os02g55060 12002.m100058 protein membrane steroid-binding protein 1, putative, expressed seq=cds; coord=5:213336713..213337573:1; parent\_gene=GRMZM2G119782'

'moderately similar to ( 223) AT1G48030 | Symbols: mtLPD1 | mtLPD1 (mitochondrial lipoamide dehydrogenase 1); ATP binding / dihydrolipoyl dehydrogenase | chr1:17717432-17719141 REVERSEmoderately similar to ( 219) DLDH\_PEA Dihydrolipoyl dehydrogenase, mitochondrial precursor (EC 1.8.1.4) (Dihydrolipoamide dehydrogenase) (Pyruvate dehydrogenase complex E3 subunit) (PDC-E3) (E3) (Glycine cleavage system L protein) - Pisum sativum (Garden pea)moderately similar to ( 249) loc\_os05g06750 12005.m05202 protein dihydrolipoyl dehydrogenase, mitochondrial precursor, putative, expressed seq=cds; coord=6:125308128..125311064:-1; parent\_gene=GRMZM2G159570'

'moderately similar to ( 223) AT1G48030 | Symbols: mtLPD1 | mtLPD1 (mitochondrial lipoamide dehydrogenase 1); ATP binding / dihydrolipoyl dehydrogenase | chr1:17717432-17719141 REVERSEmoderately similar to ( 219) DLDH\_PEA Dihydrolipoyl dehydrogenase, mitochondrial precursor (EC 1.8.1.4) (Dihydrolipoamide dehydrogenase) (Pyruvate dehydrogenase complex E3 subunit) (PDC-E3) (E3) (Glycine cleavage system L protein) - Pisum sativum (Garden pea)moderately similar to ( 249) loc\_os05g06750 12005.m05202 protein dihydrolipoyl dehydrogenase, mitochondrial precursor, putative, expressed seq=cds; coord=6:125308128..125311064:-1; parent\_gene=GRMZM2G159570'

'very weakly similar to (96.7) AT1G33360 | Symbols: | ATP-dependent Clp protease ATP-binding subunit ClpX, putative | chr1:12092111-12095789 FORWARDmoderately similar to ( 218) loc\_os05g45750 12005.m27930 protein ATP-dependent Clp protease ATP-binding subunit clpX, putative, expressed seq=cds; coord=6:159379755..159386097:-1; parent\_gene=GRMZM2G331833'

'weakly similar to ( 160) AT4G34960 | Symbols: | peptidyl-prolyl cis-trans isomerase, putative / cyclophilin, putative / rotamase, putative | chr4:16648865-16650646 FORWARDweakly similar to ( 102) CYPH\_MAIZE Peptidyl-prolyl cis-trans isomerase (EC 5.2.1.8) (PPIase) (Rotamase) (Cyclophilin) (Cyclosporin A-binding protein) - Zea mays (Maize)weakly similar to ( 175) loc\_os09g36670 12009.m06616 protein peptidyl-prolyl cis-trans isomerase CYP19-4 precursor, putative, expressed seq=cds; coord=7:30423336..30427964:1; parent\_gene=GRMZM2G092072'

'weakly similar to ( 178) AT3G06190 | Symbols: ATBPM2, BPM2 | BPM2 (BTB-POZ AND MATH DOMAIN 2); protein binding | chr3:1874577-1876575 REVERSEmoderately similar to ( 359) loc\_os06g45730 12006.m09101 protein speckle-type POZ protein, putative, expressed seq=cds; coord=7:32734580..32736140:1; parent\_gene=GRMZM2G109738'

'highly similar to ( 651) AT1G20160 | Symbols: ATSBT5.2 | ATSBT5.2; identical protein binding / serine-type endopeptidase | chr1:6990852-6993737 REVERSEhighly similar to ( 966) loc\_os09g30458 12009.m06202 protein subtilisin-like protein, putative, expressed seq=cds; coord=7:33098345..33101631:-1; parent\_gene=GRMZM2G076417'

'weakly similar to ( 126) AT1G56340 | Symbols: CRT1 | CRT1 (CALRETICULIN 1); calcium ion binding / unfolded protein binding | chr1:21090022-21092630 REVERSEweakly similar to ( 144) CALR\_MAIZE Calreticulin precursor - Zea mays (Maize)weakly similar to ( 146) loc\_os07g14270 12007.m29118 protein calreticulin precursor, putative, expressed seq=cds; coord=7:40334576..40341507:1; parent\_gene=GRMZM2G433551'

'moderately similar to ( 477) AT1G79610 | Symbols: ATNHX6, NHX6 | sodium proton exchanger, putative (NHX6) | chr1:29953089-29957070 REVERSEmoderately similar to ( 468) loc\_os09g11450 12009.m04407 protein sodium/hydrogen exchanger family protein, expressed seq=cds; coord=7:131642734..131652194:1; parent\_gene=GRMZM2G090149'

'moderately similar to ( 271) AT3G04500 | Symbols: | RNA recognition motif (RRM)-containing protein | chr3:1212065-1213795 REVERSEmoderately similar to ( 320) loc\_os08g45240 12008.m62038 protein expressed protein seq=cds; coord=7:163512342..163516768:1; parent\_gene=GRMZM2G068255'

'moderately similar to ( 249) AT1G70060 | Symbols: SNL4 | SNL4 (SIN3-LIKE 4) | chr1:26383789-26389568 FORWARDmoderately similar to ( 338) loc\_os01g01960 12001.m06838 protein paired amphipathic helix repeat family protein, expressed seq=cds; coord=8:8136058..8139636:-1; parent\_gene=AC234160.1\_FG001'

'moderately similar to ( 207) AT4G34730 | Symbols: | ribosome-binding factor A family protein | chr4:16570019-16571274 REVERSEmoderately similar to ( 243) loc\_os06g04610 12006.m05191 protein ribosome-binding factor A, chloroplast precursor, putative, expressed seq=cds; coord=9:21714338..21720944:1; parent\_gene=GRMZM2G115156'

'highly similar to ( 550) AT3G51160 | Symbols: MUR1, MUR\_1, GMD2 | MUR1 (MURUS 1); GDP-mannose 4,6-dehydratase | chr3:19007232-19008353 REVERSEhighly similar to ( 639) loc\_os06g04620 12006.m05192 protein GDP-mannose 4,6 dehydratase 2, putative, expressed seq=cds; coord=9:21726160..21727733:1; parent\_gene=GRMZM2G115124'

'moderately similar to ( 311) AT2G22240 | Symbols: ATMIPS2, MIPS2 | MIPS2 (MYO-INOSITOL-1-PHOSTPATE SYNTHASE 2); binding / catalytic/ inositol-3-phosphate synthase | chr2:9451901-9453375 REVERSEmoderately similar to ( 324) INO1\_MAIZE Inositol-3-phosphate synthase (EC 5.5.1.4) (Myo-inositol-1-phosphate synthase) (MI-1-P synthase) (IPS) - Zea mays (Maize)moderately similar to ( 318) loc\_os03g09250 12003.m35064 protein inositol-3-phosphate synthase, putative, expressed seq=cds; coord=9:23062831..23063984:-1; parent\_gene=GRMZM2G010768'

'highly similar to ( 679) AT5G35930 | Symbols: | AMP-dependent synthetase and ligase family protein | chr5:14067197-14074404 REVERSEnearly identical (1253) loc\_os06g02160 12006.m091577 protein AMP-binding enzyme family protein, expressed seq=cds; coord=9:26478641..26484651:1; parent\_gene=GRMZM2G393146'

'moderately similar to ( 252) AT1G61720 | Symbols: BAN | BAN (BANYULS); oxidoreductase | chr1:22791326-22792757 REVERSEmoderately similar to ( 208) DFRA\_MAIZE Dihydroflavonol-4-reductase (EC 1.1.1.219) (DFR) (Dihydrokaempferol 4-reductase) - Zea mays (Maize)moderately similar to ( 378) loc\_os04g53920 12004.m10284 protein leucoanthocyanidin reductase, putative seq=cds; coord=10:143752078..143754011:1; parent\_gene=GRMZM2G431504'

'nearly identical (1538) AT4G30190 | Symbols: AHA2, PMA2 | AHA2; ATPase/ hydrogen-exporting ATPase, phosphorylative mechanism | chr4:14770820-14775920 REVERSEnearly identical (1693) PMA1\_ORYSA Plasma membrane ATPase (EC 3.6.3.6) (Proton pump) - Oryza sativa (Rice)nearly identical (1693) loc\_os04g56160 12004.m101441 protein plasma membrane ATPase, putative, expressed seq=cds; coord=10:146179462..146186581:1; parent\_gene=GRMZM2G006894'

'very weakly similar to (80.9) AT4G00630 | Symbols: KEA2, ATKEA2 | KEA2; potassium ion transmembrane transporter/ potassium:hydrogen antiporter | chr4:261655-267789 REVERSEvery weakly similar to (94.7) loc\_os04g58620 12004.m10744 protein KEA1, putative, expressed seq=cds; coord=10:148570662..148572508:-1; parent\_gene=GRMZM2G039797'

'moderately similar to ( 365) AT4G27940 | Symbols: ATMTM1, MTM1 | mitochondrial substrate carrier family protein | chr4:13904745-13907036 FORWARDhighly similar to ( 527) loc\_os01g12470 12001.m07861 protein mitochondrial carrier protein CGI-69, putative, expressed seq=cds; coord=10:148922929..148926666:-1; parent\_gene=GRMZM2G177213'

'moderately similar to ( 423) AT2G17700 | Symbols: | protein kinase family protein | chr2:7685778-7689278 REVERSEweakly similar to ( 115) NORX\_MEDTR Nodulation receptor kinase precursor (EC 2.7.11.1) (Does not make infections protein 2) (Symbiosis receptor-like kinase) (MtSYMRL) - Medicago truncatula (Barrel medic)highly similar to ( 679) loc\_os04g59000 12004.m10778 protein ATP binding protein, putative, expressed seq=cds; coord=10:148973414..148980886:-1; parent\_gene=GRMZM2G104658'

'weakly similar to ( 125) AT2G17700 | Symbols: | protein kinase family protein | chr2:7685778-7689278  
REVERSEweakly similar to ( 189) loc\_os04g59000 12004.m10778 protein ATP binding protein, putative, expressed  
seq=cds; coord=10:148978659..148981143:-1; parent\_gene=GRMZM2G104658'

'moderately similar to ( 244) AT4G17980 | Symbols: anac071 | anac071 (Arabidopsis NAC domain containing protein  
71); transcription factor | chr4:9978850-9980038 REVERSEweakly similar to ( 191) NAC74\_ORYSA NAC domain-  
containing protein 74 (ONAC074) - Oryza sativa (Rice)moderately similar to ( 353) loc\_os10g42130 12010.m06969  
protein ANAC071, putative, expressed seq=cds; coord=1:98096125..98097592:1; parent\_gene=GRMZM2G082709'

'weakly similar to ( 197) AT2G23910 | Symbols: | cinnamoyl-CoA reductase-related | chr2:10177902-10179789  
FORWARDvery weakly similar to (89.4) DFRA\_MAIZE Dihydroflavonol-4-reductase (EC 1.1.1.219) (DFR)  
(Dihydrokaempferol 4-reductase) - Zea mays (Maize)moderately similar to ( 360) loc\_os10g42620 12010.m07015  
protein dihydroflavonol-4-reductase, putative, expressed seq=cds; coord=1:102244449..102248245:1;  
parent\_gene=GRMZM2G068917'

'nearly identical (1743) AT3G03050 | Symbols: CSLD3, KJK, ATCSLD3 | CSLD3 (CELLULOSE SYNTHASE-LIKE  
D3); cellulose synthase/ transferase, transferring glycosyl groups | chr3:687873-691629 FORWARDnearly identical  
(1914) loc\_os10g42750 12010.m07027 protein CSLD1 - cellulose synthase-like family D, expressed seq=cds;  
coord=1:104608860..104612984:1; parent\_gene=GRMZM2G436299'

'highly similar to ( 571) AT5G64220 | Symbols: | calmodulin-binding protein | chr5:25686434-25691903  
FORWARDnearly identical (1273) loc\_os10g22950 12010.m05301 protein calmodulin-binding transcription activator  
2, putative, expressed seq=cds; coord=1:138637289..138645028:-1; parent\_gene=GRMZM2G153594'

'moderately similar to ( 348) AT1G03280 | Symbols: | transcription initiation factor IIE (TFIIE) alpha subunit family  
protein / general transcription factor TFIIE family protein | chr1:803635-806758 FORWARDmoderately similar to ( 489)  
loc\_os08g25460 12008.m06562 protein RNA polymerase II transcription factor/ transcription initiation factor,  
putative, expressed seq=cds; coord=1:142703238..142720304:-1; parent\_gene=GRMZM2G045668'

'moderately similar to ( 286) AT5G26820 | Symbols: ATIREG3 | ATIREG3 (IRON-REGULATED PROTEIN 3) |  
chr5:9433858-9437005 FORWARDmoderately similar to ( 489) loc\_os12g37530 12012.m26930 protein expressed  
protein seq=cds; coord=1:147720182..147724862:-1; parent\_gene=GRMZM2G057820'

'weakly similar to ( 126) AT1G70670 | Symbols: | caleosin-related family protein | chr1:26644830-26645970  
FORWARDweakly similar to ( 174) loc\_os06g14350 12006.m71422 protein calcium binding EF-hand protein,  
putative, expressed seq=cds; coord=1:150224146..150226388:-1; parent\_gene=GRMZM2G075456'

'weakly similar to ( 107) AT1G14110 | Symbols: FUT9, ATFUT9 | FUT9 (FUCOSYLTRANSFERASE 9);  
fucosyltransferase | chr1:4830297-4831915 FORWARDweakly similar to ( 109) FUT1\_PEA Galactoside 2-alpha-L-  
fucosyltransferase (EC 2.4.1.69) (Xyloglucan alpha-(1,2)-fucosyltransferase) (PsFT1) - Pisum sativum (Garden  
pea)weakly similar to ( 146) loc\_os06g10920 12006.m05809 protein fucosyltransferase 8, putative, expressed seq=cds;  
coord=1:162790043..162791359:-1; parent\_gene=GRMZM2G703790'

'very weakly similar to (90.5) AT2G32300 | Symbols: UCC1 | UCC1 (UCLACYANIN 1); copper ion binding / electron carrier | chr2:13722510-13723464 FORWARDvery weakly similar to (97.8) BCP\_PEA Blue copper protein precursor - Pisum sativum (Garden pea)weakly similar to ( 108) loc\_os08g37670 12008.m07752 protein blue copper protein precursor, putative, expressed seq=cds; coord=1:182095259..182096377:-1; parent\_gene=GRMZM2G023847'

'moderately similar to ( 333) AT3G57670 | Symbols: NTT | NTT (NO TRANSMITTING TRACT); nucleic acid binding / transcription factor/ zinc ion binding | chr3:21370936-21373121 FORWARDmoderately similar to ( 434) loc\_os08g39390 12008.m07920 protein zinc finger protein, putative, expressed seq=cds; coord=1:187269130..187271929:1; parent\_gene=GRMZM2G445684'

'moderately similar to ( 281) AT2G37640 | Symbols: ATEXPA3, ATEXP3, ATHEXP ALPHA 1.9, EXP3 | EXP3 | chr2:15788077-15789812 REVERSEmoderately similar to ( 400) EXP32\_ORYSA Expansin-A32 precursor (OsEXPA32) (Alpha-expansin-32) (OsEXP32) (OsaEXPa1.30) - Oryza sativa (Rice)moderately similar to ( 400) loc\_os08g44790 12008.m08451 protein alpha-expansin 3 precursor, putative, expressed seq=cds; coord=1:203442486..203444246:1; parent\_gene=GRMZM2G030531'

'weakly similar to ( 160) AT3G11750 | Symbols: | dihydroneopterin aldolase, putative | chr3:3715071-3715904 REVERSEmoderately similar to ( 204) loc\_os09g38759 12009.m50203 protein dihydroneopterin aldolase, putative, expressed seq=cds; coord=1:205574134..205574917:-1; parent\_gene=GRMZM2G015588'

'highly similar to ( 630) AT1G58290 | Symbols: HEMA1 | HEMA1; glutamyl-tRNA reductase | chr1:21624028-21626051 REVERSEhighly similar to ( 808) HEM1\_ORYSA Glutamyl-tRNA reductase, chloroplast precursor (EC 1.2.1.70) (GluTR) - Oryza sativa (Rice)highly similar to ( 808) loc\_os10g35840 12010.m06402 protein glutamyl-tRNA reductase, chloroplast precursor, putative, expressed seq=cds; coord=1:226217182..226220470:1; parent\_gene=AC213521.3\_FG005'

'weakly similar to ( 187) AT5G23370 | Symbols: | GRAM domain-containing protein / ABA-responsive protein-related | chr5:7863542-7864201 REVERSEmoderately similar to ( 335) loc\_os10g34730 12010.m06300 protein FIP1, putative, expressed seq=cds; coord=1:229187112..229188270:1; parent\_gene=GRMZM2G113167'

'moderately similar to ( 350) AT1G11890 | Symbols: SEC22, ATSEC22 | SEC22; transporter | chr1:4011509-4012835 FORWARDmoderately similar to ( 372) loc\_os06g09850 12006.m32005 protein 25.3 kDa vesicle transport protein, putative, expressed seq=cds; coord=1:286858004..286864584:1; parent\_gene=GRMZM2G120596'

'moderately similar to ( 277) AT5G02960 | Symbols: | 40S ribosomal protein S23 (RPS23B) | chr5:693280-694396 REVERSEmoderately similar to ( 281) RS23\_FRAAN 40S ribosomal protein S23 (S12) - Fragaria ananassa (Strawberry)moderately similar to ( 288) loc\_os03g60400 12003.m10930 protein 40S ribosomal protein S23, putative, expressed seq=cds; coord=1:292879723..292882219:-1; parent\_gene=AC225147.4\_FG002'

'moderately similar to ( 261) AT2G47140 | Symbols: | short-chain dehydrogenase/reductase (SDR) family protein | chr2:19350970-19352059 REVERSEmoderately similar to ( 242) TS2\_MAIZE Sex determination protein tasselseed-2 - Zea mays (Maize)moderately similar to ( 422) loc\_os03g61740 12003.m11055 protein sex determination protein tasselseed-2, putative, expressed seq=cds; coord=1:295436901..295438003:-1; parent\_gene=GRMZM2G156739'



'weakly similar to ( 114) AT3G06778 | Symbols: | heat shock protein binding / unfolded protein binding | chr3:2140249-2141437 REVERSEmoderately similar to ( 215) loc\_os03g61550 12003.m11036 protein dnaJ domain containing protein, expressed seq=cds; coord=1:295760264..295761728:1; parent\_gene=GRMZM2G114673'

'moderately similar to ( 406) AT5G17440 | Symbols: | LUC7 N\_terminus domain-containing protein | chr5:5749849-5753415 FORWARDmoderately similar to ( 466) loc\_os03g62640 12003.m35644 protein RNA-binding protein Luc7-like 2, putative, expressed seq=cds; coord=1:297048516..297054513:-1; parent\_gene=GRMZM2G118014'

'moderately similar to ( 302) AT5G45130 | Symbols: ATRAB5A, ATRABF2A, RABF2A, RAB5A, RHA1, ATRAB-F2A, RAB-F2A | RHA1 (RAB HOMOLOG 1); GTP binding | chr5:18244495-18246060 FORWARDmoderately similar to ( 287) RHN1\_NICPL Ras-related protein RHN1 - Nicotiana glauca (Leadwort-leaved tobacco)moderately similar to ( 363) loc\_os03g46390 12003.m09657 protein ras-related protein RHN1, putative, expressed seq=cds; coord=1:300872153..300884599:-1; parent\_gene=GRMZM2G131939'

'moderately similar to ( 305) AT5G33280 | Symbols: | chloride channel-like (CLC) protein, putative | chr5:12549280-12552305 FORWARDmoderately similar to ( 402) loc\_os04g55210 12004.m10413 protein chloride channel-like protein CLC-g, putative, expressed seq=cds; coord=2:5901687..5904448:-1; parent\_gene=GRMZM2G071119'

'nearly identical (1791) AT3G28860 | Symbols: ATMDR1, ATMDR11, PGP19, MDR11, MDR1, ATPGP19, ABCB19, ATABCB19 | ABCB19; ATPase, coupled to transmembrane movement of substances / auxin efflux transmembrane transporter | chr3:10870287-10877286 REVERSEhighly similar to ( 962) MDR\_ORYSA Putative multidrug resistance protein (P-glycoprotein) - Oryza sativa (Rice)nearly identical (1887) loc\_os04g38570 12004.m101543 protein multidrug resistance protein 11, putative, expressed seq=cds; coord=2:6171190..6178089:1; parent\_gene=GRMZM2G072850'

'moderately similar to ( 421) AT5G53150 | Symbols: | heat shock protein binding / unfolded protein binding | chr5:21554935-21557202 FORWARDnearly identical (1088) loc\_os04g31940 12004.m08293 protein heat shock protein binding protein, putative, expressed seq=cds; coord=2:69703892..69707982:-1; parent\_gene=AC235541.1\_FG002'

'weakly similar to ( 110) AT5G12870 | Symbols: ATMYB46, MYB46 | MYB46 (MYB DOMAIN PROTEIN 46); DNA binding / transcription factor | chr5:4062939-4064939 REVERSEweakly similar to ( 109) MYBC\_MAIZE Anthocyanin regulatory C1 protein - Zea mays (Maize)weakly similar to ( 122) loc\_os01g07430 12001.m07369 protein anthocyanin regulatory C1 protein, putative seq=cds; coord=2:151638006..151638689:-1; parent\_gene=GRMZM2G032180'

'highly similar to ( 961) AT3G52850 | Symbols: VSR1, BP-80, ATELP, VSR-1, BP80, BP80B, ATELP1, ATVSR1 | VSR1 (VACUOLAR SORTING RECEPTOR HOMOLOG 1); amino-terminal vacuolar sorting propeptide binding | chr3:19587999-19591690 FORWARDhighly similar to ( 907) VSR1\_PEA Vacuolar sorting receptor 1 precursor (BP-80) (80 kDa proaleurin-binding protein) - Pisum sativum (Garden pea)nearly identical (1150) loc\_os11g02464 12011.m80128 protein vacuolar sorting receptor 1 precursor, putative, expressed seq=cds; coord=2:152168102..152171963:-1; parent\_gene=GRMZM2G389362'

'weakly similar to ( 154) AT5G23950 | Symbols: | C2 domain-containing protein | chr5:8082789-8083448 FORWARDmoderately similar to ( 243) loc\_os09g39770 12009.m06914 protein C2 domain containing protein, expressed seq=cds; coord=2:164667085..164668830:-1; parent\_gene=AC210204.3\_FG002'

'moderately similar to ( 395) AT5G60860 | Symbols: AtRABA1f | AtRABA1f (Arabidopsis Rab GTPase homolog A1f); GTP binding | chr5:24484750-24485565 FORWARDmoderately similar to ( 385) RB11B\_TOBAC Ras-related protein Rab11B - Nicotiana tabacum (Common tobacco)moderately similar to ( 422) loc\_os09g15790 12009.m04840 protein ras-related protein Rab11B, putative, expressed seq=cds; coord=2:175516690..175519184:1; parent\_gene=GRMZM2G039900'

'moderately similar to ( 353) AT2G35770 | Symbols: scpl28 | scpl28 (serine carboxypeptidase-like 28); serine-type carboxypeptidase | chr2:15034179-15036497 REVERSEmoderately similar to ( 364) CBP23\_HORVU Serine carboxypeptidase II-3 precursor (EC 3.4.16.6) (CP-MIL3) [Contains: Serine carboxypeptidase II-3 chain A; Serine carboxypeptidase II-3 chain B] - Hordeum vulgare (Barley)moderately similar to ( 452) loc\_os09g28830 12009.m06034 protein serine carboxypeptidase, putative seq=cds; coord=2:188817047..188819624:1; parent\_gene=GRMZM2G703293'

'nearly identical (1037) AT4G26540 | Symbols: | kinase | chr4:13394673-13398028 REVERSEmoderately similar to ( 338) RPK1\_IPONI Receptor-like protein kinase precursor (EC 2.7.11.1) - Ipomoea nil (Japanese morning glory) (Pharbitis nil)nearly identical (1429) loc\_os09g30190 12009.m06170 protein receptor-like protein kinase precursor, putative, expressed seq=cds; coord=2:189087675..189091198:1; parent\_gene=AC233861.1\_FG001'  
'moderately similar to ( 220) loc\_os09g30390 12009.m06190 protein conserved hypothetical protein seq=cds; coord=2:189309162..189309722:1; parent\_gene=GRMZM2G353446'

'very weakly similar to (81.3) AT1G32640 | Symbols: ATMYC2, RD22BP1, JAI1, JIN1, MYC2, ZBF1 | MYC2; DNA binding / transcription activator/ transcription factor | chr1:11799042-11800913 REVERSEmoderately similar to ( 204) loc\_os09g34330 12009.m06482 protein transcription factor AtMYC2, putative seq=cds; coord=2:193882051..193882939:-1; parent\_gene=GRMZM2G107560'

'moderately similar to ( 242) AT1G26665 | Symbols: | FUNCTIONS IN: molecular\_function unknown; INVOLVED IN: biological\_process unknown; LOCATED IN: cellular\_component unknown; EXPRESSED IN: 24 plant structures; EXPRESSED DURING: 15 growth stages; BEST Arabidopsis thaliana protein match is: RNA polymerase II mediator complex protein-related (TAIR:AT5G41910.1); Has 223 Blast hits to 223 proteins in 105 species: Archae - 0; Bacteria - 0; Metazoa - 112; Fungi - 83; Plants - 24; Viruses - 0; Other Eukaryotes - 4 (source: NCBI BLINK). | chr1:9214510-9215426 FORWARDmoderately similar to ( 280) loc\_os09g35920 12009.m22176 protein mediator complex subunit 10 CG5057-PA, putative, expressed seq=cds; coord=2:195046778..195052829:1; parent\_gene=GRMZM2G034260'

'weakly similar to ( 162) AT3G44220 | Symbols: | harpin-induced family protein / HIN1 family protein / harpin-responsive family protein | chr3:15928216-15929645 FORWARDmoderately similar to ( 289) loc\_os12g06260 12012.m04617 protein VAMP protein SEC22, putative, expressed seq=cds; coord=3:143060865..143062237:-1; parent\_gene=GRMZM2G368151'

'weakly similar to ( 157) AT3G57040 | Symbols: ARR9, ATRR4 | ARR9 (RESPONSE REGULATOR 9); transcription regulator/ two-component response regulator | chr3:21110059-21111228 FORWARDweakly similar to ( 192) loc\_os01g72330 12001.m13268 protein OsRR4 - Rice type-A response regulator, expressed seq=cds; coord=3:148239120..148241018:-1; parent\_gene=GRMZM2G156019'

'weakly similar to ( 151) AT2G03760 | Symbols: ST, ATST1, RAR047, ST1 | ST; brassinosteroid sulfotransferase/ sulfotransferase | chr2:1149475-1150455 REVERSEmoderately similar to ( 214) loc\_os09g38239 12009.m06769 protein flavonol sulfotransferase-like, putative, expressed seq=cds; coord=3:150720894..150721526:-1; parent\_gene=GRMZM2G347146'

'highly similar to ( 652) AT2G41510 | Symbols: ATCKX1, CKX1 | CKX1 (CYTOKININ OXIDASE/DEHYDROGENASE 1); cytokinin dehydrogenase | chr2:17314626-17316861 FORWARDmoderately similar to ( 404) CKX1\_MAIZE Cytokinin dehydrogenase 1 precursor (EC 1.5.99.12) (Cytokinin oxidase 1) (CKO 1) (COX 1) (ZmCKX1) - Zea mays (Maize)highly similar to ( 865) loc\_os01g71310 12001.m13174 protein cytokinin dehydrogenase 1 precursor, putative, expressed seq=cds; coord=3:152201140..152203793:-1; parent\_gene=GRMZM2G050997'

'highly similar to ( 627) AT2G26650 | Symbols: AKT1, ATAKT1 | AKT1 (ARABIDOPSIS K TRANSPORTER 1); cyclic nucleotide binding / inward rectifier potassium channel | chr2:11331965-11336444 REVERSEhighly similar to ( 824) AKT1\_ORYSA Potassium channel AKT1 (OsAKT1) - Oryza sativa (Rice)highly similar to ( 824) loc\_os01g45990 12001.m10798 protein potassium channel AKT1, putative, expressed seq=cds; coord=3:214273957..214280038:1; parent\_gene=GRMZM2G022915'

'weakly similar to ( 196) AT5G15380 | Symbols: DRM1 | DRM1 (domains rearranged methylase 1); DNA (cytosine-5-)methyltransferase | chr5:4991347-4994826 FORWARDmoderately similar to ( 232) loc\_os03g02010 12003.m34978 protein DNA cytosine methyltransferase Zmet3, putative, expressed seq=cds; coord=3:217806255..217809492:1; parent\_gene=GRMZM2G052991'

'highly similar to ( 803) AT1G72180 | Symbols: | leucine-rich repeat transmembrane protein kinase, putative | chr1:27164074-27167204 FORWARDmoderately similar to ( 404) RPK1\_IPONI Receptor-like protein kinase precursor (EC 2.7.11.1) - Ipomoea nil (Japanese morning glory) (Pharbitis nil)nearly identical (1344) loc\_os11g12530 12011.m05445 protein receptor-like protein kinase 5 precursor, putative, expressed seq=cds; coord=4:10031958..10037921:-1; parent\_gene=GRMZM2G011896'

'highly similar to ( 604) AT5G65700 | Symbols: BAM1 | BAM1 (BARELY ANY MERISTEM 1); ATP binding / kinase/ protein serine/threonine kinase | chr5:26281826-26284945 FORWARDweakly similar to ( 179) RPK1\_IPONI Receptor-like protein kinase precursor (EC 2.7.11.1) - Ipomoea nil (Japanese morning glory) (Pharbitis nil)highly similar to ( 645) loc\_os11g12620 12011.m05454 protein receptor protein kinase CLAVATA1 precursor, putative, expressed seq=cds; coord=4:10216533..10222046:1; parent\_gene=GRMZM2G068398'

'moderately similar to ( 201) AT4G32590 | Symbols: | ferredoxin-related | chr4:15721417-15722781 FORWARDmoderately similar to ( 207) loc\_os05g48160 12005.m27636 protein electron carrier/ electron transporter/ iron ion binding protein, putative, expressed seq=cds; coord=4:10541116..10542827:1; parent\_gene=GRMZM2G470653'

'moderately similar to ( 340) AT1G63170 | Symbols: | zinc finger (C3HC4-type RING finger) family protein | chr1:23425574-23427073 FORWARDmoderately similar to ( 465) loc\_os02g45240 12002.m09563 protein protein binding protein, putative, expressed seq=cds; coord=4:155224624..155229873:-1; parent\_gene=GRMZM2G081829'

'weakly similar to ( 120) AT1G32240 | Symbols: KAN2 | KAN2 (KANADI 2); DNA binding / transcription factor | chr1:11625882-11630355 REVERSEmoderately similar to ( 207) loc\_os02g46940 12002.m09730 protein KAN, putative, expressed seq=cds; coord=4:158068289..158073370:1; parent\_gene=GRMZM2G070865'

'moderately similar to ( 241) AT2G18330 | Symbols: | AAA-type ATPase family protein | chr2:7965829-7968915 FORWARDmoderately similar to ( 274) loc\_os02g47760 12002.m09810 protein ATPase family AAA domain-containing protein 3, putative, expressed seq=cds; coord=4:160120609..160122543:1; parent\_gene=GRMZM2G069422'

'very weakly similar to (97.1) loc\_os02g07110 12002.m06058 protein OsSAUR6 - Auxin-responsive SAUR gene family member, expressed seq=cds; coord=4:236378470..236379262:-1; parent\_gene=GRMZM2G471304'

'weakly similar to ( 161) loc\_os02g06660 12002.m06014 protein desiccation-associated protein, putative seq=cds; coord=4:236733466..236735600:-1; parent\_gene=GRMZM2G101920'

'moderately similar to ( 225) AT1G20810 | Symbols: | immunophilin / FKBP-type peptidyl-prolyl cis-trans isomerase family protein | chr1:7232025-7233367 FORWARDmoderately similar to ( 299) loc\_os02g02550 12002.m05604 protein peptidyl-prolyl cis-trans isomerase, FKBP-type family protein, expressed seq=cds; coord=4:239783229..239789117:-1; parent\_gene=GRMZM2G150337'

'weakly similar to ( 129) loc\_os03g60560 12003.m10945 protein ZFP16-2, putative, expressed seq=cds; coord=5:2378330..2379629:-1; parent\_gene=GRMZM2G002805'

'moderately similar to ( 360) AT5G66850 | Symbols: MAPKKK5 | MAPKKK5; ATP binding / kinase/ protein kinase/ protein serine/threonine kinase | chr5:26695965-26699159 REVERSEvery weakly similar to (91.3) M2K1\_ORYSA Mitogen-activated protein kinase kinase 1 (EC 2.7.12.2) (MAP kinase kinase 1) (MAPKK1) (OsMEK1) - Oryza sativa (Rice)highly similar to ( 734) loc\_os03g55560 12003.m35425 protein MAPKKK5, putative, expressed seq=cds; coord=5:6279965..6303438:1; parent\_gene=GRMZM2G034877'

'very weakly similar to (90.9) loc\_os11g18340 12011.m05910 protein cycloartenol synthase, putative seq=cds; coord=5:20097280..20098552:-1; parent\_gene=GRMZM2G156748'

'highly similar to ( 670) AT5G23190 | Symbols: CYP86B1 | CYP86B1; electron carrier/ heme binding / iron ion binding / monooxygenase/ oxygen binding | chr5:7803478-7805659 REVERSEweakly similar to ( 114) C97B2\_SOYBN Cytochrome P450 97B2 (EC 1.14.-.-) - Glycine max (Soybean)highly similar to ( 830) loc\_os10g34480 12010.m06272 protein cytochrome P450 86A2, putative, expressed seq=cds; coord=5:26443691..26446113:1; parent\_gene=GRMZM2G013082'

'moderately similar to ( 270) AT1G72820 | Symbols: | mitochondrial substrate carrier family protein | chr1:27403457-27404506 FORWARDmoderately similar to ( 371) loc\_os10g25830 12010.m05527 protein mitochondrial carrier-like protein, putative, expressed seq=cds; coord=5:35709682..35711264:1; parent\_gene=GRMZM2G043182'

'nearly identical (1023) AT1G05200 | Symbols: ATGLR3.4, GLR3.4, GLUR3 | ATGLR3.4; intracellular ligand-gated ion channel | chr1:1505642-1509002 FORWARDhighly similar to ( 890) GLR31\_ORYSA Glutamate receptor 3.1 precursor (Ligand-gated ion channel 3.1) - Oryza sativa (Rice)nearly identical (1448) loc\_os06g46670 12006.m32152 protein glutamate receptor 3.4 precursor, putative, expressed seq=cds; coord=5:46423968..46428629:1; parent\_gene=GRMZM2G057459'

'nearly identical (1153) AT3G18290 | Symbols: EMB2454 | EMB2454 (embryo defective 2454); protein binding / zinc ion binding | chr3:6274308-6280174 FORWARDnearly identical (1343) loc\_os05g47780 12005.m27952 protein CHY zinc finger family protein, expressed seq=cds; coord=6:162682754..162690139:1; parent\_gene=GRMZM2G320399'

'highly similar to ( 742) AT1G13900 | Symbols: | calcineurin-like phosphoesterase family protein | chr1:4753494-4755554 REVERSEweakly similar to ( 160) NPP\_HORVU Nucleotide pyrophosphatase/phosphodiesterase (EC 3.-.-.-) (Fragments) - Hordeum vulgare (Barley)nearly identical (1072) loc\_os07g02090 12007.m04683 protein hydrolase/ protein serine/threonine phosphatase, putative, expressed seq=cds; coord=7:1789556..1794539:-1; parent\_gene=GRMZM2G106600'

'moderately similar to ( 361) AT5G61150 | Symbols: VIP4 | VIP4 (VERNALIZATION INDEPENDENCE 4); protein binding | chr5:24603846-24607528 REVERSEhighly similar to ( 701) loc\_os07g01880 12007.m04666 protein VIP4, putative, expressed seq=cds; coord=7:1971639..1979556:1; parent\_gene=GRMZM2G019879'

'weakly similar to ( 124) AT1G12550 | Symbols: | oxidoreductase family protein | chr1:4274649-4275831 FORWARDweakly similar to ( 160) loc\_os04g01674 12004.m05484 protein glyoxylate reductase, putative, expressed seq=cds; coord=7:4964407..4965801:-1; parent\_gene=GRMZM2G040090'

'very weakly similar to (97.4) loc\_os07g05640 12007.m05028 protein proton myo-inositol cotransporter, putative, expressed seq=cds; coord=7:5335384..5336133:1; parent\_gene=GRMZM2G142063'

'weakly similar to ( 101) AT5G25610 | Symbols: RD22 | RD22; nutrient reservoir | chr5:8914498-8916684 REVERSEmoderately similar to ( 217) loc\_os02g18690 12002.m07112 protein BURP domain containing protein, expressed seq=cds; coord=7:6570622..6574976:1; parent\_gene=GRMZM2G032145'

'very weakly similar to (94.0) AT3G22620 | Symbols: | protease inhibitor/seed storage/lipid transfer protein (LTP) family protein | chr3:8008615-8009415 FORWARDweakly similar to ( 115) loc\_os07g07920 12007.m05252 protein lipid binding protein, putative, expressed seq=cds; coord=7:9201072..9202357:1; parent\_gene=GRMZM2G046750'

'moderately similar to ( 382) AT4G34880 | Symbols: | amidase family protein | chr4:16615549-16617424 FORWARDhighly similar to ( 588) loc\_os04g10460 12004.m06299 protein amidase, putative, expressed seq=cds; coord=7:148453586..148456184:-1; parent\_gene=GRMZM2G111309'

'moderately similar to ( 266) AT4G21440 | Symbols: ATMYB102, ATM4 | ATMYB102 (ARABIDOPSIS MYB-LIKE 102); DNA binding / transcription factor | chr4:11418425-11419652 REVERSEmoderately similar to ( 215) MYB38\_MAIZE Myb-related protein Zm38 - Zea mays (Maize)moderately similar to ( 355) loc\_os07g37210 12007.m07971 protein MYB transcription factor, putative, expressed seq=cds; coord=7:157167150..157168689:-1; parent\_gene=GRMZM2G031323'

'weakly similar to ( 137) loc\_os07g37850 12007.m08034 protein expressed protein seq=cds; coord=7:158126216..158127461:-1; parent\_gene=GRMZM2G089493'

'highly similar to ( 524) AT5G43100 | Symbols: | aspartyl protease family protein | chr5:17299264-17302718 FORWARDvery weakly similar to (99.4) ASP1\_ORYSA Aspartic proteinase Asp1 precursor (EC 3.4.23.-) (OsAsp1) (OSAP1) (Nucellin-like protein) - Oryza sativa (Rice)highly similar to ( 662) loc\_os07g40260 12007.m29392 protein pepsin A, putative, expressed seq=cds; coord=7:162417514..162430709:-1; parent\_gene=GRMZM2G090715'

'weakly similar to ( 197) AT1G06260 | Symbols: | cysteine proteinase, putative | chr1:1916449-1917585 FORWARDweakly similar to ( 176) ACTN\_ACTCH Actinidain precursor (EC 3.4.22.14) (Actinidin) (Allergen Act c 1) - Actinidia chinensis (Kiwi) (Yangtao)moderately similar to ( 245) loc\_os09g21370 12009.m05344 protein cysteine proteinase EP-B 1 precursor, putative, expressed seq=cds; coord=7:162839856..162841296:-1; parent\_gene=GRMZM2G036203'

'highly similar to ( 521) AT5G07810 | Symbols: | SNF2 domain-containing protein / helicase domain-containing protein / HNH endonuclease domain-containing protein | chr5:2491412-2498484 REVERSEhighly similar to ( 875) loc\_os07g40730 12007.m079739 protein ATP binding protein, putative, expressed seq=cds; coord=7:163214920..163233302:1; parent\_gene=GRMZM2G313553'

'weakly similar to ( 129) AT5G57860 | Symbols: | ubiquitin family protein | chr5:23437991-23438474 FORWARDweakly similar to ( 149) loc\_os03g24920 12003.m07835 protein ubiquitin-like protein, putative, expressed seq=cds; coord=7:170026036..170029198:1; parent\_gene=GRMZM2G055527'

'nearly identical (1079) AT2G40540 | Symbols: KT2, ATKT2, SHY3, KUP2, ATKUP2, TRK2 | KT2 (POTASSIUM TRANSPORTER 2); potassium ion transmembrane transporter | chr2:16931445-16934516 FORWARDnearly identical (1287) HAK9\_ORYSA Probable potassium transporter 9 (OsHAK9) - Oryza sativa (Rice)nearly identical (1287) loc\_os07g48130 12007.m079793 protein potassium transporter 9, putative, expressed seq=cds; coord=7:172935556..172939916:-1; parent\_gene=GRMZM2G166738'

'nearly identical (1079) AT2G40540 | Symbols: KT2, ATKT2, SHY3, KUP2, ATKUP2, TRK2 | KT2 (POTASSIUM TRANSPORTER 2); potassium ion transmembrane transporter | chr2:16931445-16934516 FORWARDnearly identical (1287) HAK9\_ORYSA Probable potassium transporter 9 (OsHAK9) - Oryza sativa (Rice)nearly identical (1287) loc\_os07g48130 12007.m079793 protein potassium transporter 9, putative, expressed seq=cds; coord=7:172935556..172939916:-1; parent\_gene=GRMZM2G166738'

'highly similar to ( 724) AT4G01690 | Symbols: PPOX, HEMG1, PPO1 | PPOX; protoporphyrinogen oxidase | chr4:729929-732309 FORWARDhighly similar to ( 720) PPOC\_TOBAC Protoporphyrinogen oxidase, chloroplast precursor (EC 1.3.3.4) (PPO I) (Protoporphyrinogen IX oxidase isozyme I) (PPX I) - Nicotiana tabacum (Common tobacco)highly similar to ( 856) loc\_os01g18320 12001.m08374 protein protoporphyrinogen oxidase, chloroplast precursor, putative, expressed seq=cds; coord=8:876212..882478:-1; parent\_gene=GRMZM2G039396'

'highly similar to ( 843) AT5G12250 | Symbols: TUB6 | TUB6 (BETA-6 TUBULIN); structural constituent of cytoskeleton | chr5:3961317-3962971 REVERSEhighly similar to ( 852) TBB5\_MAIZE Tubulin beta-5 chain (Beta-5 tubulin) - Zea mays (Maize)highly similar to ( 852) loc\_os01g18050 12001.m08347 protein tubulin beta-1 chain, putative, expressed seq=cds; coord=8:1370962..1373972:-1; parent\_gene=GRMZM2G042636'

'weakly similar to ( 141) loc\_os12g26850 12012.m06503 protein retrotransposon protein, putative, unclassified, expressed seq=cds; coord=8:101141998..101143439:1; parent\_gene=AC199379.4\_FG001'

'moderately similar to ( 277) AT5G46390 | Symbols: | peptidase S41 family protein | chr5:18816612-18819148  
FORWARDmoderately similar to ( 385) loc\_os01g47450 12001.m10940 protein carboxyl-terminal-processing  
protease precursor, putative, expressed seq=cds; coord=8:148790959..148795942:1; parent\_gene=GRMZM2G000719'

'weakly similar to ( 101) TRA1\_MAIZE Putative AC transposase (ORFA) - Zea mays (Maize)weakly similar to ( 105)  
loc\_os10g14230 12010.m04671 protein transposon protein, putative, unclassified seq=cds;  
coord=8:149218592..149219079:1; parent\_gene=GRMZM2G126917'

'weakly similar to ( 101) TRA1\_MAIZE Putative AC transposase (ORFA) - Zea mays (Maize)weakly similar to ( 105)  
loc\_os10g14230 12010.m04671 protein transposon protein, putative, unclassified seq=cds;  
coord=8:149218592..149219079:1; parent\_gene=GRMZM2G126917'

'moderately similar to ( 375) AT4G39150 | Symbols: | DNAJ heat shock N-terminal domain-containing protein |  
chr4:18233651-18235740 REVERSEmoderately similar to ( 474) loc\_os01g50700 12001.m11251 protein dehydrin  
family protein, expressed seq=cds; coord=8:153407824..153413500:1; parent\_gene=GRMZM2G469901'

'nearly identical (1107) AT4G08350 | Symbols: GTA02, GTA2 | GTA2 (GLOBAL TRANSCRIPTION FACTOR  
GROUP A2); structural constituent of ribosome / transcription elongation regulator/ transcription factor |  
chr4:5286351-5292072 FORWARDnearly identical (1303) loc\_os06g10620 12006.m05780 protein transcription  
elongation factor SPT5 homolog 1, putative, expressed seq=cds; coord=9:8943775..8956824:1;  
parent\_gene=GRMZM2G142072'

'moderately similar to ( 255) AT1G06620 | Symbols: | 2-oxoglutarate-dependent dioxygenase, putative | chr1:2025618-  
2027094 FORWARDmoderately similar to ( 217) DV4H\_CATRO Desacetoxyvindoline 4-hydroxylase (EC  
1.14.11.20) - Catharanthus roseus (Rosy periwinkle) (Madagascar periwinkle)moderately similar to ( 290)  
loc\_os03g48430 12003.m09851 protein l-aminocyclopropane-l-carboxylate oxidase, putative, expressed seq=cds;  
coord=9:8469357..8471020:1; parent\_gene=GRMZM2G066358'

'highly similar to ( 716) AT1G32900 | Symbols: | starch synthase, putative | chr1:11920582-11923506  
REVERSEnearly identical (1076) SSG1\_MAIZE Granule-bound starch synthase 1, chloroplast precursor (EC  
2.4.1.242) (Granule-bound starch synthase I) (GBSS-I) - Zea mays (Maize)highly similar to ( 933) loc\_os06g04200  
12006.m31969 protein granule-bound starch synthase 1, chloroplast precursor, putative, expressed seq=cds;  
coord=9:23256308..23260236:-1; parent\_gene=GRMZM2G024993'

'moderately similar to ( 263) AT1G50180 | Symbols: | disease resistance protein (CC-NBS-LRR class), putative |  
chr1:18584235-18587136 FORWARDhighly similar to ( 522) loc\_os10g10360 12010.m065236 protein NBS-LRR  
disease resistance protein, putative, expressed seq=cds; coord=9:25062949..25065642:-1;  
parent\_gene=GRMZM2G030051'

'moderately similar to ( 231) AT3G30340 | Symbols: | nodulin MtN21 family protein | chr3:11956626-11958969  
FORWARDmoderately similar to ( 440) loc\_os06g01840 12006.m31822 protein nodulin-like protein, putative,  
expressed seq=cds; coord=9:27017282..27019536:-1; parent\_gene=GRMZM2G168214'

'moderately similar to ( 226) AT5G53210 | Symbols: SPCH | SPCH (SPEECHLESS); DNA binding / transcription factor | chr5:21586606-21588941 REVERSEmoderately similar to ( 318) loc\_os06g33450 12006.m07882 protein DNA binding protein, putative, expressed seq=cds; coord=9:67071379..67075188:-1; parent\_gene=GRMZM2G045109'

'highly similar to ( 689) AT5G21105 | Symbols: | L-ascorbate oxidase/ copper ion binding / oxidoreductase | chr5:7174321-7177409 FORWARDhighly similar to ( 729) ASO\_CUCSA L-ascorbate oxidase precursor (EC 1.10.3.3) (Ascorbase) (ASO) - Cucumis sativus (Cucumber)highly similar to ( 915) loc\_os06g37080 12006.m08243 protein L-ascorbate oxidase precursor, putative, expressed seq=cds; coord=9:77544305..77549474:1; parent\_gene=GRMZM2G141376'

'moderately similar to ( 307) AT5G17000 | Symbols: | NADP-dependent oxidoreductase, putative | chr5:5584983-5586991 REVERSEhighly similar to ( 520) loc\_os06g40070 12006.m08544 protein NADP-dependent oxidoreductase P2, putative, expressed seq=cds; coord=9:88798886..88800768:-1; parent\_gene=GRMZM2G019872'

'moderately similar to ( 466) AT1G20760 | Symbols: | calcium-binding EF hand family protein | chr1:7209515-7214773 FORWARDnearly identical (1343) loc\_os03g03830 12003.m05915 protein calcium ion binding protein, putative, expressed seq=cds; coord=9:151488003..151502416:-1; parent\_gene=GRMZM2G120975'

'moderately similar to ( 280) AT1G13080 | Symbols: CYP71B2 | CYP71B2 (CYTOCHROME P450 71B2); electron carrier/ heme binding / iron ion binding / monooxygenase/ oxygen binding | chr1:4459493-4460807 FORWARDmoderately similar to ( 432) C71C2\_MAIZE Cytochrome P450 71C2 (EC 1.14.-.-) (Benzoxazineless 3) - Zea mays (Maize)moderately similar to ( 452) loc\_os08g01510 12008.m04299 protein cytochrome P450 71C4, putative, expressed seq=cds; coord=10:108117921..108119785:1; parent\_gene=GRMZM2G399530'

'weakly similar to ( 104) AT5G14460 | Symbols: | pseudouridine synthase/ transporter | chr5:4660239-4662543 REVERSEweakly similar to ( 110) loc\_os05g01750 12005.m04712 protein pseudouridylate synthase/ transporter, putative, expressed seq=cds; coord=10:118034725..118039344:-1; parent\_gene=GRMZM2G087180'

'weakly similar to ( 176) AT4G10250 | Symbols: ATHSP22.0 | ATHSP22.0 | chr4:6370537-6371124 FORWARDweakly similar to ( 185) HSP41\_SOYBN 22.0 kDa class IV heat shock protein precursor - Glycine max (Soybean)moderately similar to ( 227) loc\_os04g36750 12004.m08715 protein 22.0 kDa class IV heat shock protein precursor, putative, expressed seq=cds; coord=10:119759011..119760065:1; parent\_gene=GRMZM2G346839'

'moderately similar to ( 300) AT4G13550 | Symbols: | triacylglycerol lipase | chr4:7871251-7876160 REVERSEhighly similar to ( 700) loc\_os04g43030 12004.m09267 protein triacylglycerol lipase, putative, expressed seq=cds; coord=10:129921387..129931446:1; parent\_gene=GRMZM2G377641'

'moderately similar to ( 324) AT1G51740 | Symbols: SYP81, ATUFE1, ATSYP81, UFE1 | SYP81 (SYNTAXIN OF PLANTS 81); SNAP receptor/ protein binding | chr1:19189063-19191188 FORWARDmoderately similar to ( 437) loc\_os04g44810 12004.m09438 protein syntaxin 81, putative, expressed seq=cds; coord=10:132507829..132511210:1; parent\_gene=GRMZM2G040902'

'moderately similar to ( 319) AT1G22550 | Symbols: | proton-dependent oligopeptide transport (POT) family protein | chr1:7966608-7968552 REVERSEmoderately similar to ( 422) loc\_os04g59480 12004.m10824 protein POT family protein, expressed seq=cds; coord=10:149370031..149391434:1; parent\_gene=GRMZM2G011590'



'highly similar to ( 684) AT5G49720 | Symbols: ATGH9A1, DEC, KOR, RSW2, IRX2, KOR1 | ATGH9A1 (ARABIDOPSIS THALIANA GLYCOSYL HYDROLASE 9A1); cellulase/ hydrolase, hydrolyzing O-glycosyl compounds | chr5:20197765-20200168 REVERSEnearly identical (1052) GUN12\_ORYSA Endoglucanase 12 (EC 3.2.1.4) (Endo-1,4-beta glucanase 12) (OsGLU3) - Oryza sativa (Rice)nearly identical (1041) loc\_os04g41970 12004.m09171 protein glycoside transferase, six-hairpin, subgroup, putative, expressed seq=cds; coord=10:150090477..150093383:-1; parent\_gene=GRMZM2G178025'

'weakly similar to ( 181) AT1G10460 | Symbols: GLP7 | GLP7 (GERMIN-LIKE PROTEIN 7); manganese ion binding / nutrient reservoir | chr1:3439578-3440231 REVERSEweakly similar to ( 140) RHRE\_PEA Rhicadhesin receptor precursor (Germin-like protein) - Pisum sativum (Garden pea)moderately similar to ( 320) loc\_os03g08150 12003.m06324 protein germin-like protein subfamily 1 member 1 precursor, putative, expressed seq=cds; coord=1:16436083..16436786:1; parent\_gene=GRMZM2G016443'

'weakly similar to ( 143) loc\_os03g08330 12003.m06342 protein ZIM motif family protein, expressed seq=cds; coord=1:16792359..16793281:1; parent\_gene=GRMZM2G445634'

'weakly similar to ( 143) loc\_os03g08330 12003.m06342 protein ZIM motif family protein, expressed seq=cds; coord=1:16792359..16793281:1; parent\_gene=GRMZM2G445634'

'very weakly similar to (90.9) AT1G72360 | Symbols: | ethylene-responsive element-binding protein, putative | chr1:27241904-27242777 FORWARDweakly similar to ( 138) loc\_os03g08500 12003.m06358 protein ethylene-responsive element binding protein 2, putative, expressed seq=cds; coord=1:17519643..17520458:-1; parent\_gene=AC206951.3\_FG016'

'moderately similar to ( 374) AT3G54950 | Symbols: PLP7, PLA IIIA | PLA IIIA (PATATIN-LIKE PROTEIN 6) | chr3:20359076-20360774 REVERSEhighly similar to ( 671) loc\_os03g14950 12003.m06932 protein patatin-like protein 3, putative, expressed seq=cds; coord=1:35214345..35216784:1; parent\_gene=GRMZM2G030223'

'weakly similar to ( 118) AT2G37090 | Symbols: IRX9 | IRX9 (IRREGULAR XYLEM 9); transferase, transferring glycosyl groups / xylosyltransferase | chr2:15587671-15589223 REVERSEmoderately similar to ( 272) loc\_os03g17850 12003.m07210 protein beta3-glucuronyltransferase, putative, expressed seq=cds; coord=1:44176429..44177881:1; parent\_gene=GRMZM2G001079'

'highly similar to ( 518) AT5G05580 | Symbols: FAD8 | FAD8 (FATTY ACID DESATURASE 8); omega-3 fatty acid desaturase | chr5:1664331-1666345 FORWARDhighly similar to ( 531) FAD3C\_SOYBN Omega-3 fatty acid desaturase, chloroplast precursor (EC 1.14.19.-) - Glycine max (Soybean)highly similar to ( 570) loc\_os03g18070 12003.m07232 protein omega-3 fatty acid desaturase, chloroplast precursor, putative, expressed seq=cds; coord=1:44800825..44803738:-1; parent\_gene=GRMZM2G074401'

'moderately similar to ( 484) AT5G01340 | Symbols: | mitochondrial substrate carrier family protein | chr5:143240-144561 REVERSEhighly similar to ( 553) loc\_os03g18160 12003.m07241 protein tricarboxylate transport protein, mitochondrial precursor, putative, expressed seq=cds; coord=1:45400061..45402643:1; parent\_gene=AC208201.3\_FG001'

'highly similar to ( 743) AT4G29040 | Symbols: RPT2a | RPT2a (regulatory particle AAA-ATPase 2a); ATPase | chr4:14312369-14314386 FORWARDhighly similar to ( 783) PRS4\_ORYSA 26S protease regulatory subunit 4 homolog (TAT-binding protein homolog 2) - Oryza sativa (Rice)highly similar to ( 794) loc\_os03g18690 12003.m07290 protein 26S protease regulatory subunit 4, putative, expressed seq=cds; coord=1:46542947..46546531:1; parent\_gene=GRMZM2G104373'

'weakly similar to ( 162) AT4G15920 | Symbols: | INVOLVED IN: biological\_process unknown; LOCATED IN: endomembrane system, integral to membrane, membrane; EXPRESSED IN: 23 plant structures; EXPRESSED DURING: 13 growth stages; CONTAINS InterPro DOMAIN/s: MtN3 and saliva related transmembrane protein, conserved region (InterPro:IPR018169), RAG1-activating protein 1 homologue (InterPro:IPR018179), MtN3 and saliva related transmembrane protein (InterPro:IPR004316); BEST Arabidopsis thaliana protein match is: nodulin MtN3 family protein (TAIR:AT3G16690.1); Has 546 Blast hits to 527 proteins in 90 species: Archae - 0; Bacteria - 0; Metazoa - 194; Fungi - 0; Plants - 300; Viruses - 0; Other Eukaryotes - 52 (source: NCBI BLINK). | chr4:9030742-9033343 REVERSEmoderately similar to ( 304) loc\_os03g22200 12003.m101337 protein cytochrome c oxidoreductase, putative, expressed seq=cds; coord=1:57246486..57249614:1; parent\_gene=GRMZM2G107597'

'moderately similar to ( 217) AT5G51600 | Symbols: PLE, ATMAP65-3, MAP65-3 | PLE (PLEIADE); microtubule binding | chr5:20961061-20964080 REVERSEmoderately similar to ( 363) loc\_os01g49200 12001.m11107 protein microtubule-associated protein, putative, expressed seq=cds; coord=1:96660606..96664702:-1; parent\_gene=GRMZM2G379550'

'highly similar to ( 540) AT1G55120 | Symbols: ATFRUCT5 | ATFRUCT5 (BETA-FRUCTOFURANOSIDASE 5); hydrolase, hydrolyzing O-glycosyl compounds / levanase | chr1:20566983-20569165 FORWARDhighly similar to ( 897) INV6\_ORYSA Beta-fructofuranosidase, insoluble isoenzyme 6 precursor (EC 3.2.1.26) (Sucrose hydrolase 6) (Invertase 6) (Cell wall beta-fructosidase 6) (OsCIN6) - Oryza sativa (Rice)highly similar to ( 897) loc\_os04g56920 12004.m10579 protein beta-fructofuranosidase, insoluble isoenzyme 6 precursor, putative, expressed seq=cds; coord=2:3229044..3231455:1; parent\_gene=GRMZM2G018692'

'moderately similar to ( 224) AT1G19870 | Symbols: iqd32 | iqd32 (IQ-domain 32); calmodulin binding | chr1:6895400-6898539 REVERSEhighly similar to ( 811) loc\_os04g56740 12004.m35501 protein IQ calmodulin-binding motif family protein, expressed seq=cds; coord=2:3409613..3414955:-1; parent\_gene=GRMZM2G348909'

'moderately similar to ( 224) AT1G19870 | Symbols: iqd32 | iqd32 (IQ-domain 32); calmodulin binding | chr1:6895400-6898539 REVERSEhighly similar to ( 811) loc\_os04g56740 12004.m35501 protein IQ calmodulin-binding motif family protein, expressed seq=cds; coord=2:3409613..3414955:-1; parent\_gene=GRMZM2G348909'

'nearly identical (1563) AT3G13530 | Symbols: MAPKKK7, MAP3KE1 | MAPKKK7; ATP binding / binding / kinase/ protein kinase/ protein serine/threonine kinase/ protein tyrosine kinase | chr3:4411934-4419320 REVERSEweakly similar to ( 134) CIPK1\_ORYSA CIPK-like protein 1 (EC 2.7.11.1) (OsCK1) - Oryza sativa (Rice)nearly identical (2130) loc\_os04g56530 12004.m10542 protein MAPKKK7, putative, expressed seq=cds; coord=2:3775744..3804915:1; parent\_gene=GRMZM2G017654'

'moderately similar to ( 318) AT1G56120 | Symbols: | kinase | chr1:20987288-20993072 REVERSEmoderately similar to ( 214) NORK\_PEA Nodulation receptor kinase precursor (EC 2.7.11.1) - Pisum sativum (Garden pea)highly similar to ( 646) loc\_os04g56360 12004.m10526 protein protein kinase, putative seq=cds; coord=2:4050541..4053702:-1; parent\_gene=GRMZM2G391741'

'moderately similar to ( 404) AT2G18890 | Symbols: | protein kinase family protein | chr2:8184027-8185673 FORWARDweakly similar to ( 195) NORK\_MEDTR Nodulation receptor kinase precursor (EC 2.7.11.1) (Does not make infections protein 2) (Symbiosis receptor-like kinase) (MtSYMRK) - Medicago truncatula (Barrel medic)highly similar to ( 570) loc\_os04g56060 12004.m10497 protein BRASSINOSTEROID INSENSITIVE 1-associated receptor kinase 1 precursor, putative, expressed seq=cds; coord=2:4669997..4675455:1; parent\_gene=GRMZM2G086577'

'moderately similar to ( 300) AT3G54420 | Symbols: ATEP3, ATCHITIV, CHIV | ATEP3; chitinase | chr3:20145935-20147034 FORWARDmoderately similar to ( 370) CHIA\_MAIZE Endochitinase A precursor (EC 3.2.1.14) (Seed chitinase A) - Zea mays (Maize)moderately similar to ( 343) loc\_os04g41680 12004.m09144 protein endochitinase A precursor, putative, expressed seq=cds; coord=2:33507060..33508210:1; parent\_gene=GRMZM2G051921'

'weakly similar to ( 105) AT3G18550 | Symbols: BRC1, TCP18, ATTCP18 | BRC1 (BRANCHED 1); transcription factor | chr3:6383769-6385604 FORWARDweakly similar to ( 192) loc\_os09g24480 12009.m05602 protein teosinte-branched one, putative seq=cds; coord=2:179980551..179982009:1; parent\_gene=GRMZM2G110242'

'weakly similar to ( 146) AT1G68810 | Symbols: | basic helix-loop-helix (bHLH) family protein | chr1:25861289-25862882 FORWARDmoderately similar to ( 253) loc\_os09g24490 12009.m05603 protein helix-loop-helix DNA-binding domain containing protein, expressed seq=cds; coord=2:180155096..180158005:-1; parent\_gene=GRMZM2G176141'

'highly similar to ( 769) AT1G54100 | Symbols: ALDH7B4 | ALDH7B4 (Aldehyde Dehydrogenase 7B4); 3-chloroallyl aldehyde dehydrogenase/ oxidoreductase | chr1:20195435-20198853 REVERSEhighly similar to ( 785) AL7A1\_MALDO Aldehyde dehydrogenase family 7 member A1 (EC 1.2.1.3) (Antiquitin-1) (Matured fruit 60 kDa protein) (MF-60) - Malus domestica (Apple) (Malus sylvestris)highly similar to ( 902) loc\_os09g26880 12009.m22098 protein aldehyde dehydrogenase family 7 member A1, putative, expressed seq=cds; coord=2:184127551..184138715:-1; parent\_gene=GRMZM2G130440'

'highly similar to ( 515) AT2G30050 | Symbols: | transducin family protein / WD-40 repeat family protein | chr2:12825540-12826448 FORWARDhighly similar to ( 616) loc\_os02g04320 12002.m33334 protein SEC13-related protein, putative, expressed seq=cds; coord=3:3399286..3402872:-1; parent\_gene=GRMZM2G102795'

'highly similar to ( 695) AT2G34960 | Symbols: CAT5 | CAT5 (CATIONIC AMINO ACID TRANSPORTER 5); L- glutamate transmembrane transporter/ L-lysine transmembrane transporter/ arginine transmembrane transporter/ cationic amino acid transmembrane transporter | chr2:14744175-14745884 REVERSEhighly similar to ( 887) loc\_os01g11160 12001.m07736 protein cationic amino acid transporter 4, putative, expressed seq=cds; coord=3:3923176..3925460:1; parent\_gene=GRMZM2G146161'

'weakly similar to ( 160) AT4G18960 | Symbols: AG | AG (AGAMOUS); DNA binding / transcription factor | chr4:10383917-10388272 FORWARDmoderately similar to ( 226) MADS3\_ORYSA MADS-box transcription factor 3 (OsMADS3) (Protein AGAMOUS-like) (RMADS222) - Oryza sativa (Rice)moderately similar to ( 226) loc\_os01g10504 12001.m150506 protein MADS-box transcription factor 3, putative, expressed seq=cds; coord=3:4861529..4865955:-1; parent\_gene=GRMZM2G471089'

'nearly identical (1523) AT2G47000 | Symbols: MDR4, PGP4, ABCB4, ATPGP4 | ABCB4 (ATP BINDING CASSETTE SUBFAMILY B4); ATPase, coupled to transmembrane movement of substances / xenobiotic-transporting ATPase | chr2:19310008-19314750 REVERSEhighly similar to ( 892) MDR\_ORYSA Putative multidrug resistance protein (P-glycoprotein) - Oryza sativa (Rice)nearly identical (2004) loc\_os01g18670 12001.m08406 protein multidrug resistance protein 17, putative, expressed seq=cds; coord=3:50093119..50099618:-1; parent\_gene=GRMZM2G119894'

'weakly similar to ( 195) AT1G44760 | Symbols: | universal stress protein (USP) family protein | chr1:16896894-16898427 REVERSEmoderately similar to ( 267) loc\_os01g65440 12001.m12655 protein universal stress protein family protein, expressed seq=cds; coord=3:173280370..173283530:-1; parent\_gene=GRMZM2G060255'

'moderately similar to ( 209) AT4G38730 | Symbols: | unknown protein | chr4:18080484-18082305 REVERSEmoderately similar to ( 247) loc\_os01g65310 12001.m12644 protein non-imprinted in Prader-Willi/Angelman syndrome region protein 1homolog, putative, expressed seq=cds; coord=3:173795427..173798467:1; parent\_gene=GRMZM2G037229'

'weakly similar to ( 172) AT5G64520 | Symbols: XRCC2 | XRCC2 | chr5:25788069-25789884 FORWARDmoderately similar to ( 214) loc\_os01g64990 12001.m43303 protein GPI transamidase subunit PIG-U family protein, expressed seq=cds; coord=3:174688276..174694367:-1; parent\_gene=GRMZM2G002626'

'moderately similar to ( 273) AT1G44575 | Symbols: NPQ4, PSBS | NPQ4 (NONPHOTOCHEMICAL QUENCHING); chlorophyll binding / xanthophyll binding | chr1:16871768-16872548 FORWARDmoderately similar to ( 286) PSBS\_SPIOL Photosystem II 22 kDa protein, chloroplast precursor (CP22) - Spinacia oleracea (Spinach)moderately similar to ( 305) loc\_os01g64960 12001.m150788 protein photosystem II 22 kDa protein, chloroplast precursor, putative, expressed seq=cds; coord=3:174825201..174827787:-1; parent\_gene=GRMZM2G077333'

'moderately similar to ( 384) AT4G22930 | Symbols: PYR4, DHOASE | PYR4 (PYRIMIDIN 4); dihydroorotase/ hydrolase/ hydrolase, acting on carbon-nitrogen (but not peptide) bonds, in cyclic amides | chr4:12019315-12021200 FORWARDmoderately similar to ( 442) loc\_os01g54370 12001.m11601 protein dihydroorotase, mitochondrial precursor, putative, expressed seq=cds; coord=3:197320789..197322601:1; parent\_gene=GRMZM2G021704'

'nearly identical (1189) AT1G06410 | Symbols: ATTPS7, TPS7, ATTPSA | ATTPS7; alpha,alpha-trehalose-phosphate synthase (UDP-forming)/ transferase, transferring glycosyl groups / trehalose-phosphatase | chr1:1955413-1958153 FORWARDnearly identical (1538) loc\_os01g54560 12001.m150713 protein trehalose synthase, putative, expressed seq=cds; coord=3:197889969..197905140:-1; parent\_gene=GRMZM2G304274'

'weakly similar to ( 132) loc\_os10g24954 12010.m05448 protein ulp1 protease family, C-terminal catalytic domain containing protein seq=cds; coord=3:220693706..220701719:-1; parent\_gene=GRMZM2G371628'

'weakly similar to ( 130) AT2G32020 | Symbols: | GCN5-related N-acetyltransferase (GNAT) family protein | chr2:13631193-13631744 REVERSEmoderately similar to ( 231) loc\_os03g46200 12003.m09640 protein acetyltransferase, GNAT family protein, expressed seq=cds; coord=3:222582855..222584403:1; parent\_gene=GRMZM2G333775'

'moderately similar to ( 367) AT2G37650 | Symbols: | scarecrow-like transcription factor 9 (SCL9) | chr2:15792623-15794779 FORWARDweakly similar to ( 197) CIGR2\_ORYSA Chitin-inducible gibberellin-responsive protein 2 - Oryza sativa (Rice)highly similar to ( 536) loc\_os11g47890 12011.m08586 protein SCARECROW-like protein, putative, expressed seq=cds; coord=4:513060..515231:-1; parent\_gene=GRMZM2G018254'

'highly similar to ( 751) AT2G31660 | Symbols: SAD2, URM9 | SAD2 (SUPER SENSITIVE TO ABA AND DROUGHT2); binding / protein transporter | chr2:13464519-13471353 FORWARDhighly similar to ( 886) loc\_os02g27470 12002.m07891 protein importin-7, putative, expressed seq=cds; coord=4:93254018..93267787:1; parent\_gene=GRMZM2G008497'

'weakly similar to ( 142) AT5G04840 | Symbols: | bZIP protein | chr5:1406005-1407648 FORWARDmoderately similar to ( 413) loc\_os02g33560 12002.m08449 protein expressed protein seq=cds; coord=4:110523604..110529675:-1; parent\_gene=GRMZM2G118870'

'very weakly similar to (82.8) AT1G71450 | Symbols: | AP2 domain-containing transcription factor, putative | chr1:26927088-26927639 FORWARDweakly similar to ( 182) loc\_os02g35240 12002.m08612 protein dehydration-responsive element-binding protein 1A, putative seq=cds; coord=4:119082526..119083116:-1; parent\_gene=GRMZM2G139740'

'moderately similar to ( 213) AT1G47480 | Symbols: | hydrolase | chr1:17417623-17419296 FORWARDvery weakly similar to (82.8) GID1\_ORYSA Gibberellin receptor GID1 (EC 3.-.-.-) (Gibberellin-insensitive dwarf protein 1) (Protein GIBBERELLIN INSENSITIVE DWARF1) - Oryza sativa (Rice)moderately similar to ( 431) loc\_os02g35940 12002.m08682 protein gibberellin receptor GID1L2, putative, expressed seq=cds; coord=4:122677472..122678792:1; parent\_gene=GRMZM2G128219'

'moderately similar to ( 353) AT1G47500 | Symbols: ATRBP47C' | ATRBP47C' (RNA-binding protein 47C'); RNA binding | chr1:17432682-17434805 FORWARDvery weakly similar to (86.3) ROC1\_NICSY 29 kDa ribonucleoprotein A, chloroplast precursor (CP29A) - Nicotiana sylvestris (Wood tobacco)highly similar to ( 527) loc\_os04g37690 12004.m35140 protein nucleic acid binding protein, putative, expressed seq=cds; coord=4:122869806..122879188:1; parent\_gene=GRMZM2G069678'

'weakly similar to ( 108) AT4G33565 | Symbols: | protein binding / zinc ion binding | chr4:16136821-16137924 FORWARDweakly similar to ( 175) loc\_os02g36330 12002.m08720 protein RING-H2 finger protein ATL10, putative, expressed seq=cds; coord=4:123185031..123186547:-1; parent\_gene=GRMZM2G041344'

'very weakly similar to (82.8) AT4G24210 | Symbols: SLY1 | SLY1 (SLEEPY1) | chr4:12563658-12564113 FORWARDweakly similar to ( 148) GID2\_ORYSA F-box protein GID2 (Gibberellin-insensitive dwarf protein 2) (Protein GIBBERELLIN INSENSITIVE DWARF2) - Oryza sativa (Rice)very weakly similar to (87.4) loc\_os04g3887( 12004.m35150 protein 14-3-3-like protein GF14-6, putative, expressed seq=cds; coord=4:126342399..126344503:1; parent\_gene=GRMZM2G095397'

'highly similar to ( 578) AT5G19320 | Symbols: RANGAP2 | RANGAP2 (RAN GTPASE ACTIVATING PROTEIN 2); RAN GTPase activator | chr5:6505310-6506947 REVERSEhighly similar to ( 842) loc\_os05g46560 12005.m27945 protein ran GTPase activating protein, putative, expressed seq=cds; coord=4:140347561..140350401:1; parent\_gene=GRMZM2G079817'

'moderately similar to ( 308) AT5G25760 | Symbols: PEX4 | PEX4 (PEROXIN4); protein binding / ubiquitin-protein ligase | chr5:8967983-8969173 FORWARDweakly similar to ( 113) UBC2\_MEDSA Ubiquitin-conjugating enzyme E2-17 kDa (EC 6.3.2.19) (Ubiquitin-protein ligase) (Ubiquitin carrier protein) - Medicago sativa (Alfalfa)moderately similar to ( 320) loc\_os02g42314 12002.m33306 protein ubiquitin-conjugating enzyme E2 16, putative, expressed seq=cds; coord=4:145368230..145371847:-1; parent\_gene=GRMZM2G161545'

'moderately similar to ( 460) AT5G33370 | Symbols: | GDSL-motif lipase/hydrolase family protein | chr5:12602864-12604670 REVERSEweakly similar to ( 169) APG\_BRANA Anter-specific proline-rich protein APG (Protein CEX) (Fragment) - Brassica napus (Rape)highly similar to ( 576) loc\_os02g57110 12002.m10733 protein anther-specific proline-rich protein APG precursor, putative, expressed seq=cds; coord=4:171632768..171634757:1; parent\_gene=GRMZM2G384780'

'moderately similar to ( 473) AT1G80030 | Symbols: | DNAJ heat shock protein, putative | chr1:30105398-30108873 REVERSEweakly similar to ( 119) DNJH\_CUCSA DnaJ protein homolog (DNAJ-1) - Cucumis sativus (Cucumber)highly similar to ( 576) loc\_os02g56040 12002.m10628 protein chaperone protein dnaJ, putative, expressed seq=cds; coord=4:173181520..173194277:-1; parent\_gene=GRMZM2G054076'

'moderately similar to ( 407) AT1G79640 | Symbols: | ATP binding / kinase/ protein kinase/ protein serine/threonine kinase/ protein tyrosine kinase | chr1:29966913-29971387 REVERSEweakly similar to ( 134) M2K1\_ORYSA Mitogen-activated protein kinase kinase 1 (EC 2.7.12.2) (MAP kinase kinase 1) (MAPKK1) (OsMEK1) - Oryza sativa (Rice)highly similar to ( 611) loc\_os02g08240 12002.m06170 protein STE20/SPS1-related proline-alanine-rich protein kinase, putative, expressed seq=cds; coord=4:234834311..234841928:1; parent\_gene=GRMZM2G062683'

'weakly similar to ( 144) AT5G27700 | Symbols: | structural constituent of ribosome | chr5:9807541-9808048 REVERSEweakly similar to ( 164) RS21\_MAIZE 40S ribosomal protein S21 - Zea mays (Maize)weakly similar to ( 145) loc\_os03g46490 12003.m09669 protein 40S ribosomal protein S21, putative seq=cds; coord=5:1565057..1568105:-1; parent\_gene=GRMZM2G125300'

'moderately similar to ( 371) AT1G07410 | Symbols: ATRABA2B, RAB-A2B, ATRAB-A2B | ATRABA2B (ARABIDOPSIS RAB GTPASE HOMOLOG A2B); GTP binding / GTPase/ protein binding | chr1:2276270-2277154 FORWARDmoderately similar to ( 377) RB11C\_LOTJA Ras-related protein Rab11C - Lotus japonicusmoderately similar to ( 407) loc\_os03g60870 12003.m10974 protein ras-related protein Rab11A, putative, expressed seq=cds; coord=5:2259484..2263375:-1; parent\_gene=GRMZM2G144008'

'very weakly similar to (98.2) AT2G37590 | Symbols: ATDOF2.4, DOF2.4 | Dof-type zinc finger domain-containing protein | chr2:15769292-15770497 FORWARDweakly similar to ( 157) loc\_os03g60630 12003.m10953 protein expressed protein seq=cds; coord=5:2343761..2345249:-1; parent\_gene=GRMZM2G144188'

'moderately similar to ( 270) AT1G75560 | Symbols: | zinc knuckle (CCHC-type) family protein | chr1:28371420-28372717 REVERSEmoderately similar to ( 389) loc\_os03g60600 12003.m10949 protein cellular nucleic acid-binding protein, putative, expressed seq=cds; coord=5:2358363..2361474:1; parent\_gene=GRMZM2G003068'

'nearly identical (1519) AT1G08260 | Symbols: EMB529 | TIL1 (TILTED 1); DNA binding / DNA-directed DNA polymerase/ nucleic acid binding / nucleotide binding / zinc ion binding | chr1:2590944-2606892 FORWARDnearly identical (1981) loc\_os02g30800 12002.m08223 protein DNA polymerase family B, exonuclease domain containing protein, expressed seq=cds; coord=5:164340015..164361538:1; parent\_gene=GRMZM2G011631'

'weakly similar to ( 102) AT5G13910 | Symbols: LEP | LEP (LEAFY PETIOLE); DNA binding / transcription factor | chr5:4482450-4483085 REVERSEweakly similar to ( 195) loc\_os02g32040 12002.m08297 protein AP2 domain containing protein seq=cds; coord=5:166514893..166515834:1; parent\_gene=GRMZM2G047999'

'highly similar to ( 580) AT2G01830 | Symbols: WOL, CRE1, WOL1, AHK4, ATCRE1 | WOL (WOODEN LEG); cytokinin receptor/ osmosensor/ phosphoprotein phosphatase/ protein histidine kinase | chr2:363332-367429 REVERSEvery weakly similar to (92.4) ETR1\_BRAOL Ethylene receptor (EC 2.7.13.3) - Brassica oleracea (Wild cabbage)highly similar to ( 800) loc\_os02g50480 12002.m10082 protein histidine kinase 1, putative, expressed seq=cds; coord=5:205544166..205551400:1; parent\_gene=GRMZM2G151223'

'weakly similar to ( 132) AT5G10080 | Symbols: | aspartyl protease family protein | chr5:3150843-3153380 FORWARDmoderately similar to ( 201) loc\_os02g51540 12002.m10187 protein pepsin A, putative, expressed seq=cds; coord=5:208060698..208061885:1; parent\_gene=GRMZM2G335978'

'highly similar to ( 983) AT5G06670 | Symbols: | ATP binding / microtubule motor | chr5:2048243-2055019 REVERSEmoderately similar to ( 247) FLA10\_CHLRE Kinesin-like protein FLA10 (Protein KHP1) - Chlamydomonas reinhardtinearly identical (1517) loc\_os02g53520 12002.m10381 protein ATP binding protein, putative, expressed seq=cds; coord=5:211512773..211530461:-1; parent\_gene=GRMZM2G385925'

'moderately similar to ( 234) AT1G72300 | Symbols: | leucine-rich repeat transmembrane protein kinase, putative | chr1:27217679-27220966 REVERSEmoderately similar to ( 204) PSKR\_DAUCA Phytosulfokine receptor precursor (EC 2.7.11.1) (Phytosulfokine LRR receptor kinase) - Daucus carota (Carrot)moderately similar to ( 336) loc\_os02g05940 12002.m05942 protein phytosulfokine receptor precursor, putative, expressed seq=cds; coord=5:215846665..215848735:1; parent\_gene=GRMZM2G013848'

'moderately similar to ( 215) AT3G58490 | Symbols: | phosphatidic acid phosphatase family protein / PAP2 family protein | chr3:21633362-21635057 FORWARDmoderately similar to ( 278) loc\_os03g59070 12003.m10808 protein phosphoric ester hydrolase, putative, expressed seq=cds; coord=6:84569693..84573555:1; parent\_gene=GRMZM2G417009'

'weakly similar to ( 109) AT5G19000 | Symbols: ATBPM1 | ATBPM1 (BTB-POZ and MATH domain 1); protein binding | chr5:6342563-6344641 FORWARDweakly similar to ( 187) loc\_os06g14060 12006.m32038 protein speckle-type POZ protein, putative, expressed seq=cds; coord=6:93490896..93493178:-1; parent\_gene=GRMZM2G161610'

'moderately similar to ( 233) AT1G25440 | Symbols: | zinc finger (B-box type) family protein | chr1:8933939-8935284 REVERSEmoderately similar to ( 472) loc\_os06g15330 12006.m06246 protein zinc finger protein CONSTANS-LIKE 16, putative, expressed seq=cds; coord=6:117370662..117372555:1; parent\_gene=GRMZM2G012717'

'weakly similar to ( 104) AT4G30590 | Symbols: | plastocyanin-like domain-containing protein | chr4:14935760-14936469 REVERSEweakly similar to ( 180) loc\_os06g17730 12006.m06485 protein blue copper protein precursor, putative, expressed seq=cds; coord=6:119641904..119642938:1; parent\_gene=GRMZM2G148624'

'moderately similar to ( 238) ATCG00490 | Symbols: RBCL | large subunit of RUBISCO. Protein is tyrosine-phosphorylated and its phosphorylation state is modulated in response to ABA in Arabidopsis thaliana seeds. | chrC:54958-56397 FORWARDmoderately similar to ( 257) RBL\_SACOF Ribulose bisphosphate carboxylase large chain precursor (EC 4.1.1.39) (RuBisCO large subunit) - Saccharum officinarum (Sugar cane)moderately similar to ( 252) loc\_os01g58020 12001.m11949 protein ribulose bisphosphate carboxylase large chain precursor, putative seq=cds; coord=6:123912807..123913530:1; parent\_gene=GRMZM2G122563'

'very weakly similar to ( 82.4) AT2G31820 | Symbols: | ankyrin repeat family protein | chr2:13530350-13532562 FORWARDmoderately similar to ( 284) loc\_os09g12480 12009.m04511 protein conserved hypothetical protein seq=cds; coord=6:128318222..128323167:-1; parent\_gene=GRMZM2G341155'

'highly similar to ( 728) AT1G11910 | Symbols: | aspartyl protease family protein | chr1:4017119-4019874 REVERSEhighly similar to ( 876) ASPR1\_ORYSA Aspartic proteinase oryzasin-1 precursor (EC 3.4.23.-) - Oryza sativa (Rice)highly similar to ( 876) loc\_os05g49200 12005.m27639 protein aspartic proteinase oryzasin-1 precursor, putative, expressed seq=cds; coord=6:165013896..165020047:1; parent\_gene=GRMZM2G065757'

'moderately similar to ( 353) AT5G05490 | Symbols: SYN1, DIF1 | SYN1 (SYNAPTIC 1) | chr5:1624712-1629144 FORWARDhighly similar to ( 754) loc\_os05g50410 12005.m083823 protein sister chromatid cohesion 1 protein 1, putative, expressed seq=cds; coord=6:166595022..166626902:1; parent\_gene=GRMZM2G059037'

'moderately similar to ( 353) AT5G05490 | Symbols: SYN1, DIF1 | SYN1 (SYNAPTIC 1) | chr5:1624712-1629144 FORWARDhighly similar to ( 754) loc\_os05g50410 12005.m083823 protein sister chromatid cohesion 1 protein 1, putative, expressed seq=cds; coord=6:166595022..166626902:1; parent\_gene=GRMZM2G059037'

'moderately similar to ( 224) AT3G52380 | Symbols: CP33, PDE322 | CP33; RNA binding | chr3:19421619-19422855 FORWARDmoderately similar to ( 206) ROC5\_NICSY 33 kDa ribonucleoprotein, chloroplast precursor - Nicotiana sylvestris (Wood tobacco)moderately similar to ( 305) loc\_os07g06450 12007.m05106 protein ribonucleoprotein, chloroplast precursor, putative, expressed seq=cds; coord=7:6067559..6069626:-1; parent\_gene=GRMZM2G026614'

'highly similar to ( 630) AT2G32010 | Symbols: | endonuclease/exonuclease/phosphatase family protein | chr2:13625344-13628081 FORWARDhighly similar to ( 911) loc\_os07g07950 12007.m29082 protein type I inositol-1,4,5-trisphosphate 5-phosphatase CVP2, putative, expressed seq=cds; coord=7:9255254..9260899:-1; parent\_gene=GRMZM2G004301'

'moderately similar to ( 361) AT2G47170 | Symbols: ARF1A1C | ARF1A1C; GTP binding / phospholipase activator/ protein binding | chr2:19367264-19368518 FORWARDmoderately similar to ( 355) ARF\_VIGUN ADP-ribosylation factor - Vigna unguiculata (Cowpea)moderately similar to ( 365) loc\_os07g12200 12007.m05673 protein ADP-ribosylation factor 1, putative, expressed seq=cds; coord=7:20165377..20168407:1; parent\_gene=GRMZM2G105996'



'moderately similar to ( 355) AT3G11900 | Symbols: ANT1 | ANT1 (AROMATIC AND NEUTRAL TRANSPORTER 1); amino acid transmembrane transporter/ aromatic amino acid transmembrane transporter/ neutral amino acid transmembrane transporter | chr3:3758523-3760103 FORWARDhighly similar to ( 568) loc\_os07g12770 12007.m05729 protein ANT1, putative, expressed seq=cds; coord=7:21546705..21550608:-1; parent\_gene=GRMZM2G173967'

'moderately similar to ( 255) loc\_os12g37110 12012.m07496 protein ribosomal RNA apurinic site specific lyase, putative, expressed seq=cds; coord=7:30147128..30148775:1; parent\_gene=GRMZM2G012508'

'moderately similar to ( 250) AT1G05700 | Symbols: | leucine-rich repeat protein kinase, putative | chr1:1709796-1713245 FORWARDweakly similar to ( 125) NORK\_MEDTR Nodulation receptor kinase precursor (EC 2.7.11.1) (Does not make infections protein 2) (Symbiosis receptor-like kinase) (MtSYM RK) - Medicago truncatula (Barrel medic)moderately similar to ( 439) loc\_os09g19140 12009.m05122 protein senescence-induced receptor-like serine/threonine-protein kinase precursor, putative seq=cds; coord=7:95446340..95451284:-1; parent\_gene=GRMZM2G354615'

'highly similar to ( 979) AT3G47780 | Symbols: ATATH6, ATH6 | ATATH6; ATPase, coupled to transmembrane movement of substances / transporter | chr3:17624500-17628972 FORWARDvery weakly similar to (98.2) CYSA\_MESVI Probable sulfate/thiosulfate import ATP-binding protein cysA (EC 3.6.3.25) (Sulfate-transporting ATPase) - Mesostigma virideneasily identical (1293) loc\_os08g30770 12008.m07077 protein ATATH6, putative, expressed seq=cds; coord=7:97161861..97168183:1; parent\_gene=GRMZM2G355523'

'highly similar to ( 547) AT1G18870 | Symbols: ICS2 | ICS2 (ISOCHORISMATE SYNTHASE 2); isochorismate synthase | chr1:6515746-6519176 FORWARDhighly similar to ( 506) ICS\_CATRO Isochorismate synthase, chloroplast precursor (EC 5.4.4.2) - Catharanthus roseus (Rosy periwinkle) (Madagascar periwinkle)highly similar to ( 862) loc\_os09g19734 12009.m50200 protein isochorismate synthase 1, chloroplast precursor, putative, expressed seq=cds; coord=7:97622762..97626689:1; parent\_gene=GRMZM2G022837'

'moderately similar to ( 451) AT1G78130 | Symbols: UNE2 | UNE2 (unfertilized embryo sac 2); carbohydrate transmembrane transporter/ sugar:hydrogen symporter | chr1:29400171-29401814 FORWARDhighly similar to ( 581) loc\_os08g31670 12008.m07161 protein carbohydrate transporter/ sugar porter/ transporter, putative, expressed seq=cds; coord=7:100796427..100799442:1; parent\_gene=GRMZM2G176780'

'weakly similar to ( 130) loc\_os09g24954 12009.m22237 protein double-stranded RNA binding motif family protein, expressed seq=cds; coord=7:114354289..114358224:1; parent\_gene=GRMZM2G042006'

'very weakly similar to (95.1) AT5G04340 | Symbols: C2H2, CZF2, ZAT6 | ZAT6 (ZINC FINGER OF ARABIDOPSIS THALIANA 6); nucleic acid binding / transcription factor/ zinc ion binding | chr5:1216321-1217037 REVERSEvery weakly similar to (82.8) ZFP1\_WHEAT Zinc-finger protein 1 (WZF1) - Triticum aestivum (Wheat)weakly similar to ( 137) loc\_os07g40080 12007.m08250 protein zinc-finger protein 1, putative, expressed seq=cds; coord=7:162313242..162313838:1; parent\_gene=AC185108.3\_FG011'

'weakly similar to ( 191) AT1G24090 | Symbols: | RNase H domain-containing protein | chr1:8520834-8524690 FORWARDmoderately similar to ( 281) loc\_os06g13010 12006.m06017 protein nucleic acid binding protein, putative, expressed seq=cds; coord=9:2485121..2487554:-1; parent\_gene=GRMZM2G016275'

'moderately similar to ( 207) AT1G77980 | Symbols: AGL66 | AGL66 (AGAMOUS-LIKE 66); transcription factor | chr1:29315212-29317067 REVERSEvery weakly similar to (91.3) AGL8\_SINAL Agamous-like MADS-box protein AGL8 homolog (MADS B) - Sinapis alba (White mustard) (Brassica hirta)moderately similar to ( 301) loc\_os06g11970 12006.m05914 protein MADS-box protein AGL66, putative, expressed seq=cds; coord=9:5511653..5517241:1; parent\_gene=GRMZM2G152415'

'very weakly similar to (92.8) AT2G41940 | Symbols: ZFP8 | ZFP8 (ZINC FINGER PROTEIN 8); nucleic acid binding / transcription factor/ zinc ion binding | chr2:17507556-17508329 FORWARDweakly similar to ( 147) loc\_os02g53530 12002.m10382 protein zinc finger protein, putative, expressed seq=cds; coord=9:9595102..9599382:-1; parent\_gene=GRMZM2G159402'

'moderately similar to ( 429) AT2G05940 | Symbols: | protein kinase, putative | chr2:2287514-2289270 REVERSEmoderately similar to ( 218) NORX\_MEDTR Nodulation receptor kinase precursor (EC 2.7.11.1) (Does not make infections protein 2) (Symbiosis receptor-like kinase) (MtSYMRRK) - Medicago truncatula (Barrel medic)highly similar to ( 616) loc\_os06g10160 12006.m05734 protein protein kinase APK1A, chloroplast precursor, putative, expressed seq=cds; coord=9:10125256..10127926:1; parent\_gene=GRMZM2G055982'

'weakly similar to ( 116) MYB4\_ORYSA Myb-related protein Myb4 (OsMyb4) (Transcription factor RLTR1) - Oryza sativa (Rice)weakly similar to ( 116) loc\_os04g43680 12004.m09327 protein myb-related protein Myb4, putative, expressed seq=cds; coord=9:22045463..22046431:-1; parent\_gene=GRMZM2G449056'

'moderately similar to ( 322) AT3G07970 | Symbols: QRT2 | QRT2 (QUARTET 2); polygalacturonase | chr3:2541006-2543370 FORWARDmoderately similar to ( 334) PGLR\_ACTCH Polygalacturonase precursor (EC 3.2.1.15) (PG) (Pectinase) - Actinidia chinensis (Kiwi) (Yangtao)highly similar to ( 559) loc\_os03g11760 12003.m06628 protein polygalacturonase precursor, putative, expressed seq=cds; coord=9:146528352..146530720:-1; parent\_gene=GRMZM2G034835'

'very weakly similar to (98.6) AT2G41430 | Symbols: ERD15, LSR1, CID1 | ERD15 (EARLY RESPONSIVE TO DEHYDRATION 15); protein binding | chr2:17269736-17270314 FORWARDweakly similar to ( 189) loc\_os03g23010 12003.m35608 protein expressed protein seq=cds; coord=9:148225279..148226869:1; parent\_gene=GRMZM2G181551'

'very weakly similar to (89.0) AT4G40060 | Symbols: ATHB16, ATHB-16 | ATHB16 (ARABIDOPSIS THALIANA HOMEODOMAIN PROTEIN 16); sequence-specific DNA binding / transcription activator/ transcription factor | chr4:18571682-18572774 REVERSEweakly similar to ( 107) loc\_os03g08960 12003.m06402 protein homeodomain-leucine zipper transcription factor TaHDZip1-1, putative, expressed seq=cds; coord=9:149646070..149647584:1; parent\_gene=AC233899.1\_FG004'

'moderately similar to ( 323) AT5G04740 | Symbols: | ACT domain-containing protein | chr5:1368713-1371391 REVERSEmoderately similar to ( 415) loc\_os12g05650 12012.m04558 protein ACT domain containing protein, expressed seq=cds; coord=10:5523751..5529199:-1; parent\_gene=GRMZM2G066496'

'highly similar to ( 664) AT5G03940 | Symbols: FFC, 54CP, CPSRP54, SRP54CP | CPSRP54 (CHLOROPLAST SIGNAL RECOGNITION PARTICLE 54 KDA SUBUNIT); 7S RNA binding / GTP binding / mRNA binding / signal sequence binding | chr5:1060265-1063257 REVERSEmoderately similar to ( 207) SR541\_HORVU Signal recognition particle 54 kDa protein 1 (SRP54) - Hordeum vulgare (Barley)highly similar to ( 803) loc\_os11g05556 12011.m61754 protein signal recognition particle 54 kDa protein, chloroplast precursor, putative, expressed seq=cds; coord=10:5737001..5744526:-1; parent\_gene=GRMZM2G113093'

'moderately similar to ( 214) AT1G08370 | Symbols: DCP1, ATDCP1 | DCP1 (decapping 1); m7G(5')pppN diphosphatase/ protein homodimerization | chr1:2638355-2640367 FORWARDmoderately similar to ( 269) loc\_os11g05650 12011.m04762 protein dcp1-like decapping family protein, expressed seq=cds; coord=10:6009679..6012460:1; parent\_gene=GRMZM2G131120'

'highly similar to ( 848) AT5G22510 | Symbols: | beta-fructofuranosidase, putative / invertase, putative / saccharase, putative / beta-fructosidase, putative | chr5:7474974-7477479 REVERSEnearly identical (1092) loc\_os02g32730 12002.m08366 protein alkaline/neutral invertase, putative, expressed seq=cds; coord=10:300426..310885:-1; parent\_gene=GRMZM2G040843'

'weakly similar to ( 121) AT1G76410 | Symbols: ATL8 | ATL8; protein binding / zinc ion binding | chr1:28668915-28669472 FORWARDvery weakly similar to (89.0) EL5\_ORYSA E3 ubiquitin-protein ligase EL5 (EC 6.3.2.-) - Oryza sativa (Rice)weakly similar to ( 166) loc\_os02g46100 12002.m09647 protein RING-H2 finger protein ATL1R, putative, expressed seq=cds; coord=10:134991961..134992953:-1; parent\_gene=GRMZM2G031280'

'highly similar to ( 588) AT5G50850 | Symbols: MAB1 | MAB1 (MACCI-BOU); catalytic/ pyruvate dehydrogenase (acetyl-transferring) | chr5:20689671-20692976 FORWARDhighly similar to ( 576) ODPB\_PEA Pyruvate dehydrogenase E1 component subunit beta, mitochondrial precursor (EC 1.2.4.1) (PDHE1-B) - Pisum sativum (Garden pea)highly similar to ( 653) loc\_os08g42410 12008.m080219 protein pyruvate dehydrogenase E1 component subunit beta, mitochondrial precursor, putative, expressed seq=cds; coord=1:195400126..195416505:1; parent\_gene=GRMZM2G043198'

'highly similar to ( 542) AT1G60710 | Symbols: ATB2 | ATB2; oxidoreductase | chr1:22355073-22356627 REVERSEhighly similar to ( 508) IN22\_MAIZE IN2-2 protein - Zea mays (Maize)highly similar to ( 607) loc\_os04g26910 12004.m07816 protein auxin-induced protein PCNT115, putative, expressed seq=cds; coord=1:195752951..195756226:-1; parent\_gene=GRMZM2G020631'

'very weakly similar to (89.4) AT5G50380 | Symbols: ATEXO70F1 | ATEXO70F1 (exocyst subunit EXO70 family protein F1); protein binding | chr5:20516382-20518433 REVERSEmoderately similar to ( 346) loc\_os01g28600 12001.m09300 protein exo70 exocyst complex subunit family protein, expressed seq=cds; coord=1:196193577..196195939:1; parent\_gene=GRMZM2G353483'

'weakly similar to ( 104) loc\_os08g44190 12008.m08392 protein zinc finger protein 2, putative, expressed seq=cds; coord=1:205832080..205832623:1; parent\_gene=GRMZM2G104516'

'weakly similar to ( 157) AT3G11750 | Symbols: | dihydroneopterin aldolase, putative | chr3:3715071-3715904 REVERSEmoderately similar to ( 206) loc\_os09g38759 12009.m50203 protein dihydroneopterin aldolase, putative, expressed seq=cds; coord=1:206197528..206201863:1; parent\_gene=GRMZM2G095579'

'moderately similar to ( 264) AT4G38620 | Symbols: ATMYB4, MYB4 | MYB4; DNA binding / transcription factor | chr4:18053866-18054876 FORWARDmoderately similar to ( 447) MYB38\_MAIZE Myb-related protein Zm38 - Zea mays (Maize)moderately similar to ( 341) loc\_os08g43550 12008.m08329 protein myb-related protein Zm38, putative, expressed seq=cds; coord=1:206858424..206859706:1; parent\_gene=GRMZM2G084583'

'moderately similar to ( 324) AT5G24400 | Symbols: emb2024 | emb2024 (embryo defective 2024); 6-phosphogluconolactonase/ catalytic | chr5:8330532-8331784 REVERSEmoderately similar to ( 418) loc\_os09g35970 12009.m06548 protein 6-phosphogluconolactonase, putative, expressed seq=cds; coord=1:207611046..207613075:-1; parent\_gene=GRMZM2G122126'

'weakly similar to ( 132) AT4G35160 | Symbols: | O-methyltransferase family 2 protein | chr4:16730989-16732808 REVERSEmoderately similar to ( 293) ZRP4\_MAIZE O-methyltransferase ZRP4 (EC 2.1.1.-) (OMT) - Zea mays (Maize)moderately similar to ( 344) loc\_os06g16960 12006.m06409 protein O-methyltransferase ZRP4, putative seq=cds; coord=1:209119391..209120903:1; parent\_gene=GRMZM2G059465'

'weakly similar to ( 130) loc\_os08g35110 12008.m07500 protein OsSAUR33 - Auxin-responsive SAUR gene family member, expressed seq=cds; coord=1:209180557..209181568:1; parent\_gene=GRMZM2G460861'

'moderately similar to ( 378) AT2G23760 | Symbols: BLH4, SAW2 | BLH4 (BEL1-LIKE HOMEODOMAIN 4); DNA binding / transcription factor | chr2:10107951-10112736 REVERSEhighly similar to ( 771) loc\_os03g52239 12003.m101484 protein homeodomain protein JUBEL1, putative, expressed seq=cds; coord=1:273091163..273101408:-1; parent\_gene=GRMZM2G396114'

'moderately similar to ( 378) AT2G23760 | Symbols: BLH4, SAW2 | BLH4 (BEL1-LIKE HOMEODOMAIN 4); DNA binding / transcription factor | chr2:10107951-10112736 REVERSEhighly similar to ( 771) loc\_os03g52239 12003.m101484 protein homeodomain protein JUBEL1, putative, expressed seq=cds; coord=1:273091163..273101408:-1; parent\_gene=GRMZM2G396114'

'weakly similar to ( 160) AT2G21110 | Symbols: | disease resistance-responsive family protein | chr2:9050290-9050850 REVERSEmoderately similar to ( 224) loc\_os03g59440 12003.m10842 protein disease resistance response like protein, putative, expressed seq=cds; coord=1:290937052..290937639:1; parent\_gene=GRMZM2G402765'

'moderately similar to ( 390) AT2G12550 | Symbols: | ubiquitin-associated (UBA)/TS-N domain-containing protein | chr2:5114881-5118486 FORWARDhighly similar to ( 630) loc\_os04g55150 12004.m35482 protein UBA/TS-N domain containing protein, expressed seq=cds; coord=2:5925456..5929946:-1; parent\_gene=GRMZM2G070881'

'moderately similar to ( 376) AT3G52210 | Symbols: | mRNA capping enzyme family protein | chr3:19367035-19369293 FORWARDhighly similar to ( 541) MCES2\_ORYSA mRNA cap guanine-N7 methyltransferase 2 (EC 2.1.1.56) (mRNA (guanine-N(7)-)-methyltransferase 2) (mRNA cap methyltransferase 2) - Oryza sativa (Rice)highly similar to ( 541) loc\_os02g54000 12002.m10429 protein S-adenosylmethionine-dependent methyltransferase/ catalytic, putative, expressed seq=cds; coord=2:26771301..26774601:-1; parent\_gene=GRMZM2G171410'

'moderately similar to ( 449) AT3G02450 | Symbols: | cell division protein ftsH, putative | chr3:502876-505030 REVERSEmoderately similar to ( 261) FTSH\_ORYSA Cell division protease ftsH homolog, chloroplast precursor (EC 3.4.24.-) - Oryza sativa (Rice)highly similar to ( 650) loc\_os04g39190 12004.m08908 protein cell division protein ftsH homolog 4, putative, expressed seq=cds; coord=2:40408933..40420447:1; parent\_gene=GRMZM2G177070'

'highly similar to ( 577) AT5G67320 | Symbols: HOS15 | HOS15 (high expression of osmotically responsive genes 15) | chr5:26857268-26860974 FORWARDweakly similar to ( 121) PF20\_CHLRE Flagellar WD repeat protein PF20 - Chlamydomonas reinhardtiihighly similar to ( 919) loc\_os07g22220 12007.m06507 protein F-box-like/WD-repeat-containing protein TBL1XR1-A, putative, expressed seq=cds; coord=2:104729978..104750595:-1; parent\_gene=GRMZM2G149708'

'weakly similar to ( 166) loc\_os10g25210 12010.m065256 protein F-box protein interaction domain containing protein, expressed seq=cds; coord=2:128405636..128407367:1; parent\_gene=GRMZM2G365677'

'moderately similar to ( 236) AT4G23900 | Symbols: | nucleoside diphosphate kinase 4 (NDK4) | chr4:12424505-12426318 FORWARDmoderately similar to ( 231) NDK4\_SPIOL Nucleoside diphosphate kinase 4, chloroplast precursor (EC 2.7.4.6) (Nucleoside diphosphate kinase IV) (NDK IV) (NDP kinase IV) (NDPK IV) (Nucleoside diphosphate kinase III) - Spinacia oleracea (Spinach)moderately similar to ( 238) loc\_os05g51700 12005.m083838 protein nucleoside diphosphate kinase 4, chloroplast precursor, putative, expressed seq=cds; coord=2:128936549..128937471:1; parent\_gene=GRMZM2G001524'

'very weakly similar to (89.7) NIA7\_HORVU Nitrate reductase [NAD(P)H] (EC 1.7.1.2) - Hordeum vulgare (Barley)very weakly similar to (88.6) loc\_os02g53130 12002.m10342 protein nitrate reductase, putative, expressed seq=cds; coord=2:131344453..131348267:-1; parent\_gene=GRMZM2G424659'

'weakly similar to ( 190) AT5G03240 | Symbols: UBQ3 | UBQ3 (POLYUBIQUITIN 3); protein binding | chr5:771976-772896 REVERSEweakly similar to ( 190) loc\_os06g46770 12006.m091761 protein polyubiquitin containing 7 ubiquitin monomers, putative, expressed seq=cds; coord=2:142864156..142865649:-1; parent\_gene=GRMZM2G168829'

'weakly similar to ( 189) AT5G08565 | Symbols: | positive transcription elongation factor/ zinc ion binding | chr5:2775964-2777154 FORWARDmoderately similar to ( 223) loc\_os07g43060 12007.m08534 protein transcription elongation factor SPT4 homolog 1, putative, expressed seq=cds; coord=2:212361624..212366846:-1; parent\_gene=GRMZM2G086805'

'moderately similar to ( 377) AT3G17440 | Symbols: NPSN13, ATNPSN13 | NPSN13 (NOVEL PLANT SNARE 13) | chr3:5970153-5972290 REVERSEmoderately similar to ( 464) loc\_os07g44350 12007.m08656 protein novel plant SNARE 11, putative, expressed seq=cds; coord=2:213095980..213099205:-1; parent\_gene=GRMZM2G102903'

'weakly similar to ( 123) AT1G30270 | Symbols: CIPK23, SnRK3.23, ATCIPK23, LKS1 | CIPK23 (CBL-INTERACTING PROTEIN KINASE 23); kinase/ protein binding / protein serine/threonine kinase | chr1:10655270-10658524 FORWARDweakly similar to ( 108) CIPK1\_ORYSA CIPK-like protein 1 (EC 2.7.11.1) (OsCK1) - Oryza sativa (Rice)weakly similar to ( 134) loc\_os07g05620 12007.m29069 protein CIPK-like protein 1, putative, expressed seq=cds; coord=3:28055973..28058891:-1; parent\_gene=GRMZM2G012472'

'highly similar to ( 984) AT1G22870 | Symbols: | protein kinase family protein | chr1:8089501-8094173  
FORWARDnearly identical (1259) loc\_os01g42950 12001.m43091 protein ATP binding protein, putative, expressed  
seq=cds; coord=3:225446387..225454476:1; parent\_gene=GRMZM2G061681'

'highly similar to ( 984) AT1G22870 | Symbols: | protein kinase family protein | chr1:8089501-8094173  
FORWARDnearly identical (1259) loc\_os01g42950 12001.m43091 protein ATP binding protein, putative, expressed  
seq=cds; coord=3:225446387..225454476:1; parent\_gene=GRMZM2G061681'

'moderately similar to ( 376) AT5G27150 | Symbols: NHX1, ATNHX, AT-NHX1, ATNHX1 | NHX1 (NA

'moderately similar to ( 429) AT3G18830 | Symbols: ATPLT5 | ATPLT5 (POLYOL TRANSPORTER 5); D-ribose  
transmembrane transporter/ D-xylose transmembrane transporter/ carbohydrate transmembrane transporter/ galactose  
transmembrane transporter/ glucose transmembrane transporter/ glycerol transmembrane transporter/ mann |  
chr3:6489000-6491209 REVERSEweakly similar to ( 134) STC\_RICCO Sugar carrier protein C - Ricinus communis  
(Castor bean)highly similar to ( 642) loc\_os11g41850 12011.m08023 protein sugar transporter family protein,  
putative, expressed seq=cds; coord=4:4601041..4602806:1; parent\_gene=GRMZM2G157057'

'moderately similar to ( 429) AT3G18830 | Symbols: ATPLT5 | ATPLT5 (POLYOL TRANSPORTER 5); D-ribose  
transmembrane transporter/ D-xylose transmembrane transporter/ carbohydrate transmembrane transporter/ galactose  
transmembrane transporter/ glucose transmembrane transporter/ glycerol transmembrane transporter/ mann |  
chr3:6489000-6491209 REVERSEweakly similar to ( 134) STC\_RICCO Sugar carrier protein C - Ricinus communis  
(Castor bean)highly similar to ( 642) loc\_os11g41850 12011.m08023 protein sugar transporter family protein,  
putative, expressed seq=cds; coord=4:4601041..4602806:1; parent\_gene=GRMZM2G157057'

'highly similar to ( 676) AT3G03810 | Symbols: EDA30 | EDA30 (embryo sac development arrest 30) | chr3:972190-  
975901 REVERSEnearly identical (1014) loc\_os05g04190 12005.m083565 protein auxin-independent growth  
promoter protein, putative, expressed seq=cds; coord=4:169505982..169512726:-1; parent\_gene=GRMZM2G025671'

'highly similar to ( 503) AT2G03220 | Symbols: FT1, ATFUT1, ATFT1, MUR2 | FT1 (FUCOSYLTRANSFERASE 1);  
fucosyltransferase/ transferase, transferring glycosyl groups | chr2:970401-972353 REVERSEhighly similar to ( 513)  
FUT1\_PEA Galactoside 2-alpha-L-fucosyltransferase (EC 2.4.1.69) (Xyloglucan alpha-(1,2)-fucosyltransferase)  
(PsFT1) - Pisum sativum (Garden pea)highly similar to ( 697) loc\_os02g52630 12002.m10293 protein  
fucosyltransferase 7, putative, expressed seq=cds; coord=4:178596383..178598254:-1;  
parent\_gene=GRMZM2G471594'

'highly similar to ( 503) AT2G03220 | Symbols: FT1, ATFUT1, ATFT1, MUR2 | FT1 (FUCOSYLTRANSFERASE 1);  
fucosyltransferase/ transferase, transferring glycosyl groups | chr2:970401-972353 REVERSEhighly similar to ( 513)  
FUT1\_PEA Galactoside 2-alpha-L-fucosyltransferase (EC 2.4.1.69) (Xyloglucan alpha-(1,2)-fucosyltransferase)  
(PsFT1) - Pisum sativum (Garden pea)highly similar to ( 697) loc\_os02g52630 12002.m10293 protein  
fucosyltransferase 7, putative, expressed seq=cds; coord=4:178596383..178598254:-1;  
parent\_gene=GRMZM2G471594'

'moderately similar to ( 294) AT4G39870 | Symbols: | FUNCTIONS IN: molecular\_function unknown; INVOLVED IN: biological\_process unknown; LOCATED IN: cellular\_component unknown; EXPRESSED IN: 23 plant structures; EXPRESSED DURING: 15 growth stages; CONTAINS InterPro DOMAIN/s: TLDc (InterPro:IPR006571); BEST Arabidopsis thaliana protein match is: unknown protein (TAIR:AT2G05590.2); Has 2018 Blast hits to 1865 proteins in 220 species: Archae - 0; Bacteria - 39; Metazoa - 1002; Fungi - 279; Plants - 129; Viruses - 34; Other Eukaryotes - 535 (source: NCBI BLINK). | chr4:18502234-18504275 FORWARDhighly similar to ( 525) loc\_os02g51770 12002.m33456 protein TLD family protein, expressed seq=cds; coord=4:180630485..180634437:-1; parent\_gene=GRMZM2G101518'

'weakly similar to ( 158) AT1G22050 | Symbols: MUB6 | MUB6 (MEMBRANE-ANCHORED UBIQUITIN-FOLD PROTEIN 6 PRECURSOR) | chr1:7771897-7772843 FORWARDmoderately similar to ( 230) MUB3\_ORYSA Membrane-anchored ubiquitin-fold protein 3 precursor (Membrane-anchored ub-fold protein 3) (OsMUB3) - Oryza sativa (Rice)moderately similar to ( 230) loc\_os02g51500 12002.m34032 protein NTGP5, putative, expressed seq=cds; coord=4:181420387..181424633:1; parent\_gene=GRMZM2G025470'

'moderately similar to ( 236) AT4G22580 | Symbols: | exostosin family protein | chr4:11889382-11890689 REVERSEvery weakly similar to (99.8) KATAM\_ORYSA Xyloglucan galactosyltransferase KATAMARI1 homolog (EC 2.4.1.-) - Oryza sativa (Rice)moderately similar to ( 339) loc\_os10g40559 12010.m06823 protein xyloglucan galactosyltransferase KATAMARI 1, putative, expressed seq=cds; coord=4:183063050..183066593:1; parent\_gene=GRMZM2G021401'

'highly similar to ( 539) AT2G45260 | Symbols: | unknown protein | chr2:18664661-18665938 REVERSEhighly similar to ( 735) loc\_os10g23220 12010.m21871 protein expressed protein seq=cds; coord=4:183405528..183408894:-1; parent\_gene=GRMZM2G111720'

'weakly similar to ( 143) AT5G37055 | Symbols: ATSWC6, SEF | SEF (SERRATED LEAVES AND EARLY FLOWERING) | chr5:14641634-14642387 REVERSEweakly similar to ( 199) loc\_os03g25260 12003.m07868 protein zinc finger HIT domain-containing protein 1, putative, expressed seq=cds; coord=4:183736182..183738617:-1; parent\_gene=GRMZM2G089876'

'moderately similar to ( 247) AT5G53210 | Symbols: SPCH | SPCH (SPEECHLESS); DNA binding / transcription factor | chr5:21586606-21588941 REVERSEmoderately similar to ( 361) loc\_os02g15760 12002.m06819 protein DNA binding protein, putative seq=cds; coord=4:224623490..224627055:1; parent\_gene=GRMZM2G085751'

'highly similar to ( 754) AT4G18810 | Symbols: | binding / catalytic/ transcription repressor | chr4:10322622-10325735 REVERSEhighly similar to ( 941) loc\_os02g13970 12002.m77732 protein UOS1, putative, expressed seq=cds; coord=4:228626363..228632489:1; parent\_gene=GRMZM2G019358'

'moderately similar to ( 289) AT5G40160 | Symbols: EMB506 | EMB506 (embryo defective 506); protein binding | chr5:16062726-16064301 REVERSEmoderately similar to ( 369) loc\_os06g13000 12006.m06016 protein ankyrin repeat protein, chloroplast precursor, putative, expressed seq=cds; coord=4:238951331..238953642:1; parent\_gene=GRMZM2G019838'

'moderately similar to ( 444) AT3G29185 | Symbols: | unknown protein | chr3:11155092-11157207 REVERSEhighly similar to ( 536) loc\_os03g55164 12003.m101731 protein OsWRKY4 - Superfamily of rice TFs having WRKY and zinc finger domains, expressed seq=cds; coord=5:6575335..6578215:-1; parent\_gene=GRMZM2G089696'

'highly similar to ( 691) AT3G02130 | Symbols: RPK2, TOAD2 | RPK2 (RECEPTOR-LIKE PROTEIN KINASE 2); ATP binding / kinase/ protein serine/threonine kinase | chr3:381224-384181 FORWARDmoderately similar to ( 292) PSKR\_DAUCA Phytosulfokine receptor precursor (EC 2.7.11.1) (Phytosulfokine LRR receptor kinase) - *Daucus carota* (Carrot)highly similar to ( 961) loc\_os03g54900 12003.m35418 protein phytosulfokine receptor precursor, putative, expressed seq=cds; coord=5:6858359..6862072:1; parent\_gene=GRMZM2G072658'

'moderately similar to ( 323) AT3G22845 | Symbols: | emp24/gp25L/p24 protein-related | chr3:8087373-8088550 FORWARDmoderately similar to ( 377) loc\_os03g53310 12003.m10303 protein suppressor/enhancer of lin-12 protein 9 precursor, putative, expressed seq=cds; coord=5:7598126..7603275:1; parent\_gene=GRMZM2G147046'

'weakly similar to ( 192) AT4G07990 | Symbols: | DNAJ heat shock N-terminal domain-containing protein | chr4:4825650-4829608 REVERSEmoderately similar to ( 339) loc\_os03g51830 12003.m10163 protein heat shock protein binding protein, putative, expressed seq=cds; coord=5:9187793..9192085:-1; parent\_gene=GRMZM2G129700'

'nearly identical (1406) AT1G09570 | Symbols: PHYA, FHY2, FRE1, HY8 | PHYA (PHYTOCHROME A); G-protein coupled photoreceptor/ protein histidine kinase/ red or far-red light photoreceptor/ signal transducer | chr1:3095498-3098892 REVERSEnearly identical (2126) PHYA1\_MAIZE Phytochrome A - *Zea mays* (Maize)nearly identical (1915) loc\_os03g51030 12003.m101474 protein phytochrome A, putative, expressed seq=cds; coord=5:10101047..10106758:-1; parent\_gene=GRMZM2G181028'

'nearly identical (1406) AT1G09570 | Symbols: PHYA, FHY2, FRE1, HY8 | PHYA (PHYTOCHROME A); G-protein coupled photoreceptor/ protein histidine kinase/ red or far-red light photoreceptor/ signal transducer | chr1:3095498-3098892 REVERSEnearly identical (2126) PHYA1\_MAIZE Phytochrome A - *Zea mays* (Maize)nearly identical (1915) loc\_os03g51030 12003.m101474 protein phytochrome A, putative, expressed seq=cds; coord=5:10101047..10106758:-1; parent\_gene=GRMZM2G181028'

'nearly identical (1406) AT1G09570 | Symbols: PHYA, FHY2, FRE1, HY8 | PHYA (PHYTOCHROME A); G-protein coupled photoreceptor/ protein histidine kinase/ red or far-red light photoreceptor/ signal transducer | chr1:3095498-3098892 REVERSEnearly identical (2126) PHYA1\_MAIZE Phytochrome A - *Zea mays* (Maize)nearly identical (1915) loc\_os03g51030 12003.m101474 protein phytochrome A, putative, expressed seq=cds; coord=5:10101047..10106758:-1; parent\_gene=GRMZM2G181028'

'very weakly similar to (90.1) AT2G46270 | Symbols: GBF3 | GBF3 (G-BOX BINDING FACTOR 3); sequence-specific DNA binding / transcription factor | chr2:19000859-19002901 FORWARDvery weakly similar to (93.6) CPRF1\_PETCR Common plant regulatory factor CPRF-1 - *Petroselinum crispum* (Parsley) (*Petroselinum hortense*)weakly similar to ( 168) loc\_os05g49420 12005.m09012 protein G-box-binding factor 3, putative, expressed seq=cds; coord=6:165343365..165345512:1; parent\_gene=GRMZM2G011932'

'weakly similar to ( 173) AT4G18060 | Symbols: | clathrin binding | chr4:10027668-10029662 REVERSEmoderately similar to ( 233) loc\_os07g32460 12007.m07511 protein clathrin binding protein, putative, expressed seq=cds; coord=7:52837501..52840130:-1; parent\_gene=GRMZM2G043758'

'very weakly similar to (89.0) AT3G03920 | Symbols: | Gar1 RNA-binding region family protein | chr3:1009123-1010379 REVERSEvery weakly similar to (97.8) loc\_os11g37080 12011.m07556 protein h/ACA ribonucleoprotein complex subunit 1-like protein 1, putative, expressed seq=cds; coord=7:135694991..135698715:-1; parent\_gene=GRMZM2G463359'



'very weakly similar to (85.5) AT2G16120 | Symbols: | mannitol transporter, putative | chr2:6996727-6998441 REVERSEweakly similar to ( 148) loc\_os1lg41840 12011.m08022 protein arabinose-proton symporter, putative seq=cds; coord=7:165314232..165315737:1; parent\_gene=GRMZM2G377502'

'weakly similar to ( 162) AT5G19000 | Symbols: ATBPM1 | ATBPM1 (BTB-POZ and MATH domain 1); protein binding | chr5:6342563-6344641 FORWARDmoderately similar to ( 239) loc\_os08g41240 12008.m08102 protein ATBPM1, putative seq=cds; coord=7:168107563..168108606:1; parent\_gene=AC195147.3\_FG001'

'weakly similar to ( 162) AT5G19000 | Symbols: ATBPM1 | ATBPM1 (BTB-POZ and MATH domain 1); protein binding | chr5:6342563-6344641 FORWARDmoderately similar to ( 239) loc\_os08g41240 12008.m08102 protein ATBPM1, putative seq=cds; coord=7:168107563..168108606:1; parent\_gene=AC195147.3\_FG001'

'weakly similar to ( 162) AT5G19000 | Symbols: ATBPM1 | ATBPM1 (BTB-POZ and MATH domain 1); protein binding | chr5:6342563-6344641 FORWARDmoderately similar to ( 239) loc\_os08g41240 12008.m08102 protein ATBPM1, putative seq=cds; coord=7:168107563..168108606:1; parent\_gene=AC195147.3\_FG001'

'highly similar to ( 724) AT4G24290 | Symbols: | FUNCTIONS IN: molecular\_function unknown; INVOLVED IN: biological\_process unknown; LOCATED IN: plasma membrane; EXPRESSED IN: 18 plant structures; EXPRESSED DURING: 9 growth stages; CONTAINS InterPro DOMAIN/s: Membrane attack complex component/perforin/complement C9 (InterPro:IPR001862); BEST Arabidopsis thaliana protein match is: NSL1 (necrotic spotted lesions 1) (TAIR:AT1G28380.1); Has 150 Blast hits to 149 proteins in 30 species: Archae - 0; Bacteria - 0; Metazoa - 41; Fungi - 0; Plants - 104; Viruses - 0; Other Eukaryotes - 5 (source: NCBI BLINK). | chr4:12594856-12597815 FORWARDhighly similar to ( 931) loc\_os07g07194 12007.m66713 protein MAC/Perforin domain containing protein, expressed seq=cds; coord=8:157413485..157419964:-1; parent\_gene=GRMZM2G435034'

'moderately similar to ( 439) AT3G48530 | Symbols: KING1 | KING1 (SNF1-RELATED PROTEIN KINASE REGULATORY SUBUNIT GAMMA 1) | chr3:17987559-17989592 FORWARDhighly similar to ( 671) loc\_os01g69240 12001.m13024 protein AKIN gamma, putative, expressed seq=cds; coord=8:161621236..161623147:1; parent\_gene=GRMZM2G003493'

'moderately similar to ( 265) AT3G57170 | Symbols: | N-acetylglucosaminyl transferase component family protein / Gpi1 family protein | chr3:21159620-21162259 REVERSEweakly similar to ( 187) loc\_os05g22370 12005.m27768 protein N-acetylglucosaminyl transferase component, putative, expressed seq=cds; coord=8:161880772..161882765:1; parent\_gene=GRMZM2G070898'

'moderately similar to ( 380) AT5G07280 | Symbols: EMS1, EXS | EMS1 (EXCESS MICROSPOROCTES1); kinase/ transmembrane receptor protein kinase | chr5:2285088-2288666 FORWARDmoderately similar to ( 315) RPK1\_IPONI Receptor-like protein kinase precursor (EC 2.7.11.1) - Ipomoea nil (Japanese morning glory) (Pharbitis nil)highly similar to ( 904) loc\_os01g68870 12001.m43349 protein leucine-rich repeat receptor protein kinase EXS precursor, putative, expressed seq=cds; coord=8:162190503..162207903:-1; parent\_gene=GRMZM2G107484'

'highly similar to ( 789) AT2G47940 | Symbols: DEGP2 | DEGP2; serine-type endopeptidase/ serine-type peptidase | chr2:19618372-19622164 REVERSEhighly similar to ( 980) loc\_os05g05480 12005.m27701 protein protease Do-like 2, chloroplast precursor, putative, expressed seq=cds; coord=10:89988812..90000754:-1; parent\_gene=GRMZM2G063592'

'weakly similar to ( 156) AT4G27780 | Symbols: ACBP2 | ACBP2 (ACYL-COA BINDING PROTEIN ACBP 2); acyl-CoA binding / lead ion binding | chr4:13847774-13849629 FORWARDmoderately similar to ( 248) loc\_os04g58550 12004.m10737 protein acyl-CoA-binding domain-containing protein 6, putative, expressed seq=cds; coord=10:148514945..148517583:-1; parent\_gene=GRMZM2G173636'

'weakly similar to ( 156) AT4G27780 | Symbols: ACBP2 | ACBP2 (ACYL-COA BINDING PROTEIN ACBP 2); acyl-CoA binding / lead ion binding | chr4:13847774-13849629 FORWARDmoderately similar to ( 248) loc\_os04g58550 12004.m10737 protein acyl-CoA-binding domain-containing protein 6, putative, expressed seq=cds; coord=10:148514945..148517583:-1; parent\_gene=GRMZM2G173636'

'weakly similar to ( 188) AT3G21750 | Symbols: UGT71B1 | UGT71B1 (UDP-GLUCOSYL TRANSFERASE 71B1); UDP-glycosyltransferase/ quercetin 3-O-glucosyltransferase/ transferase, transferring glycosyl groups | chr3:7664565-7665986 FORWARDvery weakly similar to (85.1) ZOX\_PHAVU Zeatin O-xylosyltransferase (EC 2.4.2.40) (Zeatin O-beta-D-xylosyltransferase) - Phaseolus vulgaris (Kidney bean) (French bean)moderately similar to ( 423) loc\_os07g32020 12007.m07468 protein anthocyanidin 3-O-glucosyltransferase, putative, expressed seq=cds; coord=1:19489549..19492878:1; parent\_gene=GRMZM2G039129'

'weakly similar to ( 188) AT3G21750 | Symbols: UGT71B1 | UGT71B1 (UDP-GLUCOSYL TRANSFERASE 71B1); UDP-glycosyltransferase/ quercetin 3-O-glucosyltransferase/ transferase, transferring glycosyl groups | chr3:7664565-7665986 FORWARDvery weakly similar to (85.1) ZOX\_PHAVU Zeatin O-xylosyltransferase (EC 2.4.2.40) (Zeatin O-beta-D-xylosyltransferase) - Phaseolus vulgaris (Kidney bean) (French bean)moderately similar to ( 423) loc\_os07g32020 12007.m07468 protein anthocyanidin 3-O-glucosyltransferase, putative, expressed seq=cds; coord=1:19489549..19492878:1; parent\_gene=GRMZM2G039129'

'highly similar to ( 578) AT5G64220 | Symbols: | calmodulin-binding protein | chr5:25686434-25691903 FORWARDnearly identical (1259) loc\_os03g09100 12003.m06416 protein calmodulin-binding transcription activator 2, putative, expressed seq=cds; coord=1:19789491..19793759:-1; parent\_gene=GRMZM2G447551'

'highly similar to ( 578) AT5G64220 | Symbols: | calmodulin-binding protein | chr5:25686434-25691903 FORWARDnearly identical (1259) loc\_os03g09100 12003.m06416 protein calmodulin-binding transcription activator 2, putative, expressed seq=cds; coord=1:19789491..19793759:-1; parent\_gene=GRMZM2G447551'

'highly similar to ( 518) AT5G05580 | Symbols: FAD8 | FAD8 (FATTY ACID DESATURASE 8); omega-3 fatty acid desaturase | chr5:1664331-1666345 FORWARDhighly similar to ( 531) FAD3C\_SOYBN Omega-3 fatty acid desaturase, chloroplast precursor (EC 1.14.19.-) - Glycine max (Soybean)highly similar to ( 570) loc\_os03g18070 12003.m07232 protein omega-3 fatty acid desaturase, chloroplast precursor, putative, expressed seq=cds; coord=1:44800825..44803738:-1; parent\_gene=GRMZM2G074401'

'highly similar to ( 601) AT2G47500 | Symbols: | ATP binding / microtubule motor | chr2:19493247-19497882 FORWARDvery weakly similar to (98.2) K125\_TOBAC 125 kDa kinesin-related protein - Nicotiana tabacum (Common tobacco)highly similar to ( 807) loc\_os03g18980 12003.m07316 protein kinesin-4, putative, expressed seq=cds; coord=1:47699083..47705236:-1; parent\_gene=GRMZM2G122965'

'moderately similar to ( 229) AT1G56500 | Symbols: | haloacid dehalogenase-like hydrolase family protein | chr1:21159775-21167092 FORWARDmoderately similar to ( 349) loc\_os03g19760 12003.m35188 protein NHL repeat protein, putative, expressed seq=cds; coord=1:50700350..50712129:1; parent\_gene=AC208571.4\_FG001'

'highly similar to ( 966) AT3G56370 | Symbols: | leucine-rich repeat transmembrane protein kinase, putative | chr3:20899403-20902390 REVERSEmoderately similar to ( 334) PSKR\_DAUCA Phytosulfokine receptor precursor (EC 2.7.11.1) (Phytosulfokine LRR receptor kinase) - Daucus carota (Carrot)nearly identical (1484) loc\_os03g21730 12003.m07577 protein receptor-like protein kinase precursor, putative, expressed seq=cds; coord=1:56073143..56077145:1; parent\_gene=GRMZM2G119850'

'moderately similar to ( 447) AT2G37650 | Symbols: | scarecrow-like transcription factor 9 (SCL9) | chr2:15792623-15794779 FORWARDmoderately similar to ( 207) CIGR2\_ORYSA Chitin-inducible gibberellin-responsive protein 2 - Oryza sativa (Rice)highly similar to ( 708) loc\_os12g38490 12012.m07635 protein chitin-inducible gibberellin-responsive protein 1, putative, expressed seq=cds; coord=1:155675315..155678789:1; parent\_gene=GRMZM2G179325'

'weakly similar to ( 117) AT3G07390 | Symbols: AIR12 | AIR12; extracellular matrix structural constituent | chr3:2365452-2366273 FORWARDmoderately similar to ( 203) loc\_os08g41290 12008.m08107 protein AIR12, putative, expressed seq=cds; coord=1:220523997..220524734:-1; parent\_gene=AC217977.3\_FG001'

'moderately similar to ( 409) loc\_os10g37570 12010.m06544 protein F-box domain containing protein, expressed seq=cds; coord=1:222945692..222947391:-1; parent\_gene=GRMZM2G067626'

'weakly similar to ( 187) AT4G14750 | Symbols: IQD19 | IQD19 (IQ-domain 19); calmodulin binding | chr4:8470449-8471903 FORWARDmoderately similar to ( 314) loc\_os10g28420 12010.m05722 protein IQ calmodulin-binding motif family protein seq=cds; coord=1:240038938..240040880:1; parent\_gene=GRMZM2G070673'

'weakly similar to ( 110) loc\_os04g56690 12004.m10556 protein OsSAUR23 - Auxin-responsive SAUR gene family member, expressed seq=cds; coord=2:3587683..3588347:1; parent\_gene=GRMZM2G365166'

'weakly similar to ( 110) loc\_os04g56690 12004.m10556 protein OsSAUR23 - Auxin-responsive SAUR gene family member, expressed seq=cds; coord=2:3587683..3588347:1; parent\_gene=GRMZM2G365166'

'highly similar to ( 504) AT5G23810 | Symbols: AAP7 | AAP7; amino acid transmembrane transporter | chr5:8028461-8030138 FORWARDhighly similar to ( 740) loc\_os04g56470 12004.m101680 protein AAP7, putative, expressed seq=cds; coord=2:3935621..3938281:-1; parent\_gene=GRMZM2G042933'

'moderately similar to ( 318) AT1G56120 | Symbols: | kinase | chr1:20987288-20993072 REVERSEmoderately similar to ( 214) NORK\_PEA Nodulation receptor kinase precursor (EC 2.7.11.1) - Pisum sativum (Garden pea)highly similar to ( 646) loc\_os04g56360 12004.m10526 protein protein kinase, putative seq=cds; coord=2:4050541..4053702:-1; parent\_gene=GRMZM2G391741'

'moderately similar to ( 294) AT1G73110 | Symbols: | ribulose biphosphate carboxylase/oxygenase activase, putative / RuBisCO activase, putative | chr1:27494344-27496844 REVERSEmoderately similar to ( 202) RCA\_MAIZE Ribulose biphosphate carboxylase/oxygenase activase, chloroplast precursor (RuBisCO activase) (RA) - Zea mays (Maize)moderately similar to ( 344) loc\_os04g56320 12004.m10522 protein ribulose biphosphate carboxylase/oxygenase activase, chloroplast precursor, putative, expressed seq=cds; coord=2:4159971..4163217:1; parent\_gene=GRMZM2G039345'

'moderately similar to ( 494) AT5G67200 | Symbols: | leucine-rich repeat transmembrane protein kinase, putative | chr5:26813893-26816555 REVERSEweakly similar to ( 149) PSKR\_DAUCA Phytosulfokine receptor precursor (EC 2.7.11.1) (Phytosulfokine LRR receptor kinase) - Daucus carota (Carrot)nearly identical (1002) loc\_os04g55620 12004.m10453 protein receptor kinase, putative, expressed seq=cds; coord=2:5374131..5380129:1; parent\_gene=GRMZM2G055844'

'highly similar to ( 873) AT5G53550 | Symbols: YSL3, ATYSL3 | YSL3 (YELLOW STRIPE LIKE 3); oligopeptide transporter | chr5:21756081-21758776 FORWARDnearly identical (1098) loc\_os04g45860 12004.m101436 protein transposon protein, putative, unclassified, expressed seq=cds; coord=2:21633846..21638619:-1; parent\_gene=GRMZM2G051179'

'very weakly similar to (84.0) loc\_os03g17540 12003.m101301 protein TBC domain containing protein, expressed seq=cds; coord=2:21912102..21916408:1; parent\_gene=GRMZM2G132055'

'weakly similar to ( 140) AT5G66320 | Symbols: | zinc finger (GATA type) family protein | chr5:26496208-26497309 REVERSEmoderately similar to ( 204) loc\_os04g45650 12004.m35556 protein expressed protein seq=cds; coord=2:22068797..22071156:-1; parent\_gene=GRMZM2G404973'

'weakly similar to ( 140) AT5G66320 | Symbols: | zinc finger (GATA type) family protein | chr5:26496208-26497309 REVERSEmoderately similar to ( 204) loc\_os04g45650 12004.m35556 protein expressed protein seq=cds; coord=2:22068797..22071156:-1; parent\_gene=GRMZM2G404973'

'very weakly similar to (89.7) loc\_os04g33030 12004.m08399 protein inhibitor of apoptosis-like protein, putative, expressed seq=cds; coord=2:60874838..60875855:-1; parent\_gene=GRMZM2G068590'

'very weakly similar to (92.4) AT4G34160 | Symbols: CYCD3;1, CYCD3 | CYCD3;1 (CYCLIN D3;1); cyclin-dependent protein kinase regulator/ protein binding | chr4:16357903-16359304 FORWARDmoderately similar to ( 213) loc\_os09g02360 12009.m03608 protein cyclin delta-3, putative, expressed seq=cds; coord=2:163317840..163320224:1; parent\_gene=GRMZM2G161382'

'highly similar to ( 513) AT4G04320 | Symbols: | malonyl-CoA decarboxylase family protein | chr4:2113565-2116525 FORWARDhighly similar to ( 728) loc\_os09g23070 12009.m05464 protein malonyl-CoA decarboxylase, mitochondrial precursor, putative, expressed seq=cds; coord=2:178716947..178725990:-1; parent\_gene=GRMZM2G043501'

'weakly similar to ( 162) AT2G42280 | Symbols: | basic helix-loop-helix (bHLH) family protein | chr2:17611891-17613163 REVERSEmoderately similar to ( 219) loc\_os09g31300 12009.m22140 protein helix-loop-helix DNA-binding domain containing protein, expressed seq=cds; coord=2:189701055..189703654:1; parent\_gene=GRMZM2G417597'

'moderately similar to ( 379) AT3G21190 | Symbols: | unknown protein | chr3:7432579-7434543 REVERSEhighly similar to ( 593) loc\_os09g32320 12009.m06320 protein expressed protein seq=cds; coord=2:191000059..191004274:-1; parent\_gene=GRMZM2G150319'

'weakly similar to ( 172) AT2G25810 | Symbols: TIP4;1 | TIP4;1 (tonoplast intrinsic protein 4;1); water channel | chr2:11012658-11013906 FORWARDmoderately similar to ( 270) TIP43\_ORYSA Probable aquaporin TIP4.3 (Tonoplast intrinsic protein 4.3) (OsTIP4.3) - Oryza sativa (Rice)moderately similar to ( 270) loc\_os01g13120 12001.m07922 protein aquaporin TIP4.1, putative, expressed seq=cds; coord=3:1847906..1849027:-1; parent\_gene=GRMZM2G093090'

'weakly similar to ( 172) AT2G25810 | Symbols: TIP4;1 | TIP4;1 (tonoplast intrinsic protein 4;1); water channel | chr2:11012658-11013906 FORWARDmoderately similar to ( 270) TIP43\_ORYSA Probable aquaporin TIP4.3 (Tonoplast intrinsic protein 4.3) (OsTIP4.3) - Oryza sativa (Rice)moderately similar to ( 270) loc\_os01g13120 12001.m07922 protein aquaporin TIP4.1, putative, expressed seq=cds; coord=3:1847906..1849027:-1; parent\_gene=GRMZM2G093090'

'weakly similar to ( 172) AT2G25810 | Symbols: TIP4;1 | TIP4;1 (tonoplast intrinsic protein 4;1); water channel | chr2:11012658-11013906 FORWARDmoderately similar to ( 270) TIP43\_ORYSA Probable aquaporin TIP4.3 (Tonoplast intrinsic protein 4.3) (OsTIP4.3) - Oryza sativa (Rice)moderately similar to ( 270) loc\_os01g13120 12001.m07922 protein aquaporin TIP4.1, putative, expressed seq=cds; coord=3:1847906..1849027:-1; parent\_gene=GRMZM2G093090'

'moderately similar to ( 452) AT3G15350 | Symbols: | glycosyltransferase family 14 protein / core-2/I-branching enzyme family protein | chr3:5167250-5168882 FORWARDhighly similar to ( 561) loc\_os01g10440 12001.m07665 protein xylosyltransferase oxt, putative, expressed seq=cds; coord=3:4706836..4710494:1; parent\_gene=GRMZM2G055313'

'nearly identical (1256) AT2G26910 | Symbols: PDR4, ATPDR4 | PDR4 (PLEIOTROPIC DRUG RESISTANCE 4); ATPase, coupled to transmembrane movement of substances | chr2:11481623-11487874 FORWARDnearly identical (1686) PDR6\_ORYSA Pleiotropic drug resistance protein 6 - Oryza sativa (Rice)nearly identical (1060) loc\_os02g11760 12002.m06425 protein PDR5-like ABC transporter, putative, expressed seq=cds; coord=3:10273100..10283228:1; parent\_gene=GRMZM2G118243'

'moderately similar to ( 385) AT2G36800 | Symbols: DOGT1, UGT73C5 | DOGT1 (DON-GLUCOSYLTRANSFERASE 1); UDP-glycosyltransferase/ cis-zeatin O-beta-D-glucosyltransferase/ glucosyltransferase/ quercetin 4'-O-glucosyltransferase/ quercetin 7-O-glucosyltransferase/ trans-zeatin O-beta-D-glucosyltransferase/ transferase, transf | chr2:15423493-15424980 REVERSEweakly similar to ( 190) CZOG\_SORBI Putative cis-zeatin O-glucosyltransferase (EC 2.4.1.215) - Sorghum bicolor (Sorghum) (Sorghum vulgare)highly similar to ( 681) loc\_os10g09990 12010.m04338 protein cytokinin-O-glucosyltransferase 3, putative, expressed seq=cds; coord=3:10843334..10845067:1; parent\_gene=GRMZM2G338465'

'moderately similar to ( 228) AT2G25810 | Symbols: TIP4;1 | TIP4;1 (tonoplast intrinsic protein 4;1); water channel | chr2:11012658-11013906 FORWARDmoderately similar to ( 287) TIP42\_ORYSA Probable aquaporin TIP4.2 (Tonoplast intrinsic protein 4.2) (OsTIP4.2) - Oryza sativa (Rice)moderately similar to ( 287) loc\_os01g13130 12001.m07923 protein aquaporin TIP4.1, putative, expressed seq=cds; coord=3:13529209..13532077:1; parent\_gene=GRMZM2G146627'

'moderately similar to ( 410) loc\_os02g43750 12002.m09409 protein transcription initiation factor, putative, expressed seq=cds; coord=3:13846717..13865900:-1; parent\_gene=GRMZM2G102664'

'moderately similar to ( 209) AT5G48930 | Symbols: HCT | HCT (HYDROXYCINNAMOYL-COA SHIKIMATE/QUINATE HYDROXYCINNAMOYL TRANSFERASE); quinate O-hydroxycinnamoyltransferase/shikimate O-hydroxycinnamoyltransferase/ transferase | chr5:19836654-19838092 REVERSEweakly similar to ( 182) HCBT1\_DIACA Anthranilate N-benzoyltransferase protein 1 (EC 2.3.1.144) (Anthranilate N-hydroxycinnamoyl/benzoyltransferase 1) - Dianthus caryophyllus (Carnation) (Clove pink)moderately similar to ( 429) loc\_os08g43040 12008.m26780 protein anthranilate N-benzoyltransferase protein 1, putative, expressed seq=cds; coord=3:17019972..17021399:1; parent\_gene=AC215260.3\_FG003'

'moderately similar to ( 451) AT2G27600 | Symbols: SKD1, VPS4 | SKD1 (SUPPRESSOR OF K

'nearly identical (1523) AT2G47000 | Symbols: MDR4, PGP4, ABCB4, ATPGP4 | ABCB4 (ATP BINDING CASSETTE SUBFAMILY B4); ATPase, coupled to transmembrane movement of substances / xenobiotic-transporting ATPase | chr2:19310008-19314750 REVERSEhighly similar to ( 892) MDR\_ORYSA Putative multidrug resistance protein (P-glycoprotein) - Oryza sativa (Rice)nearly identical (2004) loc\_os01g18670 12001.m08406 protein multidrug resistance protein 17, putative, expressed seq=cds; coord=3:50093119..50099618:-1; parent\_gene=GRMZM2G119894'

'weakly similar to ( 116) AT5G18620 | Symbols: CHR17 | CHR17 (CHROMATIN REMODELING FACTOR17); ATP binding / DNA binding / DNA-dependent ATPase/ helicase/ hydrolase, acting on acid anhydrides, in phosphorus-containing anhydrides / nucleic acid binding / nucleosome binding | chr5:6196190-6202058 REVERSEweakly similar to ( 137) ISW2\_ORYSA Probable chromatin remodelling complex ATPase chain (EC 3.6.1.-) (ISW2-like) (Sucrose nonfermenting protein 2 homolog) - Oryza sativa (Rice)weakly similar to ( 137) loc\_os01g27040 12001.m09155 protein chromatin remodelling complex ATPase chain, putative, expressed seq=cds; coord=3:68357930..68359191:1; parent\_gene=GRMZM2G015277'

'very weakly similar to (98.2) AT1G72610 | Symbols: GLP1, ATGER1, GER1 | GER1 (GERMIN-LIKE PROTEIN 1); oxalate oxidase | chr1:27339302-27339928 REVERSEvery weakly similar to (95.1) AB19A\_PRUPE Auxin-binding protein ABP19a precursor - Prunus persica (Peach)weakly similar to ( 105) loc\_os08g35760 12008.m07565 protein auxin-binding protein ABP20 precursor, putative, expressed seq=cds; coord=3:110255712..110257286:1; parent\_gene=GRMZM2G343974'

'weakly similar to ( 180) AT2G47710 | Symbols: | universal stress protein (USP) family protein | chr2:19555045-19555956 REVERSEmoderately similar to ( 246) loc\_os12g36630 12012.m07449 protein fiber protein Fb19, putative, expressed seq=cds; coord=3:130262812..130263752:1; parent\_gene=AC209744.3\_FG001'

'weakly similar to ( 169) AT2G44120 | Symbols: | 60S ribosomal protein L7 (RPL7C) | chr2:18249227-18250417 REVERSEweakly similar to ( 187) loc\_os08g13690 12008.m05494 protein 60S ribosomal protein L7-1, putative, expressed seq=cds; coord=3:139217403..139225950:-1; parent\_gene=GRMZM2G174769'

'weakly similar to ( 174) AT1G68200 | Symbols: | zinc finger (CCCH-type) family protein | chr1:25562118-25563948 FORWARDmoderately similar to ( 234) loc\_os01g45730 12001.m10773 protein nucleic acid binding protein, putative seq=cds; coord=3:214751394..214753488:1; parent\_gene=GRMZM2G157927'

'highly similar to ( 984) AT1G22870 | Symbols: | protein kinase family protein | chr1:8089501-8094173 FORWARDnearly identical (1259) loc\_os01g42950 12001.m43091 protein ATP binding protein, putative, expressed seq=cds; coord=3:225446387..225454476:1; parent\_gene=GRMZM2G061681'

'moderately similar to ( 392) AT5G12100 | Symbols: | pentatricopeptide (PPR) repeat-containing protein | chr5:3911388-3913838 FORWARDmoderately similar to ( 270) RF1\_ORYSA Rf1 protein, mitochondrial precursor (PPR protein) (Fertility restorer) (Restorer for CMS) - Oryza sativa (Rice)highly similar to ( 718) loc\_os08g31110 12008.m07109 protein fertility restorer, putative, expressed seq=cds; coord=4:75017798..75020292:1; parent\_gene=GRMZM2G146518'

'moderately similar to ( 318) AT3G16180 | Symbols: | proton-dependent oligopeptide transport (POT) family protein | chr3:5481477-5484943 REVERSEmoderately similar to ( 495) loc\_os11g23890 12011.m06314 protein peptide transporter PTR2, putative seq=cds; coord=4:86443074..86444800:1; parent\_gene=AC184794.2\_FG003'

'moderately similar to ( 226) AT1G21230 | Symbols: WAK5 | WAK5 (WALL ASSOCIATED KINASE 5); kinase/ protein serine/threonine kinase | chr1:7429980-7432346 FORWARDweakly similar to ( 159) PSKR\_DAUCA Phytosulfokine receptor precursor (EC 2.7.11.1) (Phytosulfokine LRR receptor kinase) - Daucus carota (Carrot)moderately similar to ( 443) loc\_os10g09620 12010.m04304 protein OsWAK108 - OsWAK receptor-like protein kinase, expressed seq=cds; coord=4:87222023..87233713:1; parent\_gene=GRMZM2G132591'

'moderately similar to ( 266) AT5G13170 | Symbols: SAG29 | SAG29 (SENESCENCE-ASSOCIATED PROTEIN 29) chr5:4181331-4183171 REVERSEmoderately similar to ( 387) loc\_os02g30910 12002.m08234 protein MTN3, putative, expressed seq=cds; coord=4:96310957..96312854:1; parent\_gene=GRMZM2G168365'

'moderately similar to ( 442) ATM00220 | Symbols: COB | Mitochondrial apocytochrome b (cob) gene encodes a subunit of the ubiquinol-cytochrome c oxidoreductase and is part of a 5 kb transcript. The transcript also contains a pseudogene for ribosomal protein S14 called RPS15 and a tRNA(Ser) gene. Both the Cob and RPS15 genes are edited in the transcript. | chrM:60235-61416 FORWARDmoderately similar to ( 461) CYB\_MAIZE Cytochrome b - Zea mays (Maize)moderately similar to ( 461) loc\_osm1g00480 11706.m00041 protein Apocytochrome b seq=cds; coord=4:111680559..111685048:-1; parent\_gene=GRMZM2G054687'

'highly similar to ( 577) AT5G03300 | Symbols: ADK2 | ADK2 (ADENOSINE KINASE 2); adenosine kinase/ copper ion binding / kinase | chr5:796573-798997 FORWARDmoderately similar to ( 474) ADK\_PHYPA Adenosine kinase (EC 2.7.1.20) (AK) (Adenosine 5'-phosphotransferase) - Physcomitrella patens (Moss)highly similar to ( 646) loc\_os02g41590 12002.m09195 protein adenosine kinase 2, putative, expressed seq=cds; coord=4:143082898..143087846:-1; parent\_gene=GRMZM2G135132'

'weakly similar to ( 167) AT5G57360 | Symbols: ZTL, LKP1, ADO1, FKL2 | ZTL (ZEITLUPE); protein binding / ubiquitin-protein ligase | chr5:23241597-23244415 FORWARDweakly similar to ( 178) ADO1\_ORYSA Adagio-like protein 1 - Oryza sativa (Rice)weakly similar to ( 178) loc\_os06g47890 12006.m32164 protein adagio protein 1, putative, expressed seq=cds; coord=4:237488619..237489629:-1; parent\_gene=GRMZM2G166147'

'very weakly similar to (99.0) AT4G16780 | Symbols: ATHB-2, HAT4, ATHB2 | ATHB-2 (ARABIDOPSIS THALIANA HOMEBOX PROTEIN 2); DNA binding / protein homodimerization/ sequence-specific DNA binding / transcription factor | chr4:9449291-9450604 FORWARDweakly similar to ( 129) loc\_os02g05640 12002.m05912 protein homeobox-leucine zipper protein ATHB-4, putative seq=cds; coord=4:237502428..237504286:-1; parent\_gene=GRMZM2G166041'

'weakly similar to ( 144) AT5G27700 | Symbols: | structural constituent of ribosome | chr5:9807541-9808048 REVERSEweakly similar to ( 164) RS21\_MAIZE 40S ribosomal protein S21 - Zea mays (Maize)weakly similar to ( 145) loc\_os03g46490 12003.m09669 protein 40S ribosomal protein S21, putative seq=cds; coord=5:1565057..1568105:-1; parent\_gene=GRMZM2G125300'

'very weakly similar to (98.2) AT2G37590 | Symbols: ATDOF2.4, DOF2.4 | Dof-type zinc finger domain-containing protein | chr2:15769292-15770497 FORWARDweakly similar to ( 157) loc\_os03g60630 12003.m10953 protein expressed protein seq=cds; coord=5:2343761..2345249:-1; parent\_gene=GRMZM2G144188'

'very weakly similar to (98.2) AT2G37590 | Symbols: ATDOF2.4, DOF2.4 | Dof-type zinc finger domain-containing protein | chr2:15769292-15770497 FORWARDweakly similar to ( 157) loc\_os03g60630 12003.m10953 protein expressed protein seq=cds; coord=5:2343761..2345249:-1; parent\_gene=GRMZM2G144188'

'moderately similar to ( 375) AT3G22750 | Symbols: | protein kinase, putative | chr3:8037364-8039096 REVERSEhighly similar to ( 538) loc\_os03g53410 12003.m10311 protein ATMRK1, putative, expressed seq=cds; coord=5:7587329..7589198:-1; parent\_gene=GRMZM2G014618'

'highly similar to ( 840) AT5G43670 | Symbols: | transport protein, putative | chr5:17539025-17541733 REVERSEnearly identical (1272) loc\_os03g53140 12003.m35407 protein protein transport protein Sec23A, putative, expressed seq=cds; coord=5:7775738..7779579:-1; parent\_gene=GRMZM2G077295'

'highly similar to ( 747) AT3G12110 | Symbols: ACT11 | ACT11 (actin-11); structural constituent of cytoskeleton | chr3:3858116-3859609 FORWARDhighly similar to ( 758) ACT1\_ORYSA Actin-1 - Oryza sativa (Rice)highly similar to ( 758) loc\_os03g50890 12003.m10074 protein actin-1, putative, expressed seq=cds; coord=5:10223674..10226373:-1; parent\_gene=GRMZM2G152328'

'moderately similar to ( 430) AT4G12790 | Symbols: | ATP-binding family protein | chr4:7517280-7518892 REVERSEhighly similar to ( 506) loc\_os03g50620 12003.m101469 protein ATP binding protein, putative, expressed seq=cds; coord=5:10583966..10588381:1; parent\_gene=GRMZM2G131324'

'moderately similar to ( 269) loc\_os03g50110 12003.m10006 protein expressed protein seq=cds; coord=5:11590629..11592307:1; parent\_gene=GRMZM2G162405'

'weakly similar to ( 119) AT4G33630 | Symbols: EX1 | EX1 (EXECUTER1) | chr4:16155560-16159094 FORWARDweakly similar to ( 152) loc\_os01g01790 12001.m42829 protein expressed protein seq=cds; coord=5:15142195..15154928:-1; parent\_gene=GRMZM2G420732'



'moderately similar to ( 223) AT5G05620 | Symbols: TUBG2, ATGCP2, GCP2 | GCP2 (GAMMA-TUBULIN COMPLEX PROTEIN 2); GTP binding / GTPase/ structural molecule | chr5:1679340-1681719 FORWARDmoderately similar to ( 229) TBG2\_MAIZE Tubulin gamma-2 chain (Gamma-2 tubulin) - Zea mays (Maize)moderately similar to ( 225) loc\_os05g06450 12005.m27549 protein tubulin gamma-2 chain, putative, expressed seq=cds; coord=5:15437689..15443735:-1; parent\_gene=GRMZM2G078612'

'highly similar to ( 617) AT5G54090 | Symbols: | DNA mismatch repair MutS family protein | chr5:21948283-21952550 REVERSEhighly similar to ( 874) loc\_os10g36530 12010.m06463 protein mutS domain V family protein, expressed seq=cds; coord=5:23337364..23367111:-1; parent\_gene=GRMZM2G060349'

'weakly similar to ( 187) AT3G50360 | Symbols: ATCEN2, CEN1 | ATCEN2 (CENTRIN2); calcium ion binding | chr3:18674421-18675502 FORWARDweakly similar to ( 158) CATR\_CHLRE Caltractin (Centrin) (20 kDa calcium-binding protein) - Chlamydomonas reinhardtii moderately similar to ( 242) loc\_os10g25010 12010.m05452 protein caltractin, putative, expressed seq=cds; coord=5:37374885..37376902:-1; parent\_gene=GRMZM2G096228'

'weakly similar to ( 187) AT3G50360 | Symbols: ATCEN2, CEN1 | ATCEN2 (CENTRIN2); calcium ion binding | chr3:18674421-18675502 FORWARDweakly similar to ( 158) CATR\_CHLRE Caltractin (Centrin) (20 kDa calcium-binding protein) - Chlamydomonas reinhardtii moderately similar to ( 242) loc\_os10g25010 12010.m05452 protein caltractin, putative, expressed seq=cds; coord=5:37374885..37376902:-1; parent\_gene=GRMZM2G096228'

'weakly similar to ( 153) loc\_os10g08570 12010.m04205 protein RNA recognition motif family protein, expressed seq=cds; coord=5:37931456..37936949:-1; parent\_gene=AC217556.3\_FG003'

'nearly identical (3229) AT1G36160 | Symbols: ACC1, AT-ACC1, EMB22, GK, PAS3 | ACC1 (ACETYL-COENZYME A CARBOXYLASE 1); acetyl-CoA carboxylase | chr1:13534196-13543773 FORWARDmoderately similar to ( 228) MCCA\_SOYBN Methylcrotonoyl-CoA carboxylase subunit alpha, mitochondrial precursor (EC 6.4.1.4) (3-methylcrotonyl-CoA carboxylase 1) (MCCase subunit alpha) (3-methylcrotonyl-CoA:carbon dioxide ligase subunit alpha) - Glycine max (Soybean)nearly identical (3953) loc\_os10g21910 12010.m65459 protein acetyl-coenzyme A carboxylase ACC1A, putative, expressed seq=cds; coord=5:38567212..38578529:-1; parent\_gene=GRMZM2G377341'

'moderately similar to ( 442) AT2G47420 | Symbols: | dimethyladenosine transferase, putative | chr2:19457574-19458777 FORWARDhighly similar to ( 605) loc\_os10g10434 12010.m04378 protein dimethyladenosine transferase, putative, expressed seq=cds; coord=5:88606055..88608547:1; parent\_gene=GRMZM2G136599'

'moderately similar to ( 232) AT2G47210 | Symbols: | myb family transcription factor | chr2:19379039-19382204 FORWARDmoderately similar to ( 291) loc\_os05g46330 12005.m08758 protein DNA methyltransferase I-associated protein 1, putative, expressed seq=cds; coord=5:114740551..114771064:-1; parent\_gene=GRMZM2G159155'

'moderately similar to ( 229) AT1G65480 | Symbols: FT | FT (FLOWERING LOCUS T); phosphatidylethanolamine binding / protein binding | chr1:24331510-24333689 FORWARDweakly similar to ( 184) CET1\_TOBAC CEN-like protein 1 - Nicotiana tabacum (Common tobacco)moderately similar to ( 315) loc\_os02g13830 12002.m06629 protein OsFTL13 - Rice FT-Like13 homologous to Arabidopsis Flowering Locus T gene seq=cds; coord=5:149997592..149998908:-1; parent\_gene=GRMZM2G108016'

'nearly identical (1519) AT1G08260 | Symbols: EMB529 | TIL1 (TILTED 1); DNA binding / DNA-directed DNA polymerase/ nucleic acid binding / nucleotide binding / zinc ion binding | chr1:2590944-2606892 FORWARDnearly identical (1981) loc\_os02g30800 12002.m08223 protein DNA polymerase family B, exonuclease domain containing protein, expressed seq=cds; coord=5:164340015..164361538:1; parent\_gene=GRMZM2G011631'

'moderately similar to ( 201) AT2G33550 | Symbols: | gt-2-related | chr2:14210180-14211487 REVERSEmoderately similar to ( 280) loc\_os02g31160 12002.m08259 protein conserved hypothetical protein seq=cds; coord=5:165851119..165855227:-1; parent\_gene=GRMZM2G084684'

'moderately similar to ( 299) AT5G03700 | Symbols: | PAN domain-containing protein | chr5:965874-967322 REVERSEvery weakly similar to (86.3) KPRO\_MAIZE Putative receptor protein kinase ZmPK1 precursor (EC 2.7.11.1) - Zea mays (Maize)highly similar to ( 647) loc\_os02g32620 12002.m08355 protein D-mannose binding lectin family protein, expressed seq=cds; coord=5:168428378..168430248:1; parent\_gene=GRMZM2G038669'

'weakly similar to ( 114) AT3G56240 | Symbols: CCH | CCH (COPPER CHAPERONE); copper chaperone | chr3:20863460-20864402 REVERSEweakly similar to ( 119) loc\_os02g32814 12002.m08373 protein heavy metal-associated domain containing protein, expressed seq=cds; coord=5:168671806..168673715:1; parent\_gene=GRMZM2G113332'

'weakly similar to ( 114) AT3G56240 | Symbols: CCH | CCH (COPPER CHAPERONE); copper chaperone | chr3:20863460-20864402 REVERSEweakly similar to ( 119) loc\_os02g32814 12002.m08373 protein heavy metal-associated domain containing protein, expressed seq=cds; coord=5:168671806..168673715:1; parent\_gene=GRMZM2G113332'

'moderately similar to ( 224) AT4G25590 | Symbols: ADF7 | ADF7 (actin depolymerizing factor 7); actin binding | chr4:13059137-13060050 REVERSEmoderately similar to ( 239) ADF\_LILLO Actin-depolymerizing factor (ADF) - Lilium longiflorum (Trumpet lily)moderately similar to ( 263) loc\_os02g44470 12002.m09487 protein actin-depolymerizing factor, putative, expressed seq=cds; coord=5:193084737..193087687:-1; parent\_gene=GRMZM2G015127'

'moderately similar to ( 231) AT5G14430 | Symbols: | dehydration-responsive protein-related | chr5:4653092-4655741 FORWARDmoderately similar to ( 304) loc\_os06g47294 12006.m91847 protein ankyrin like protein, putative, expressed seq=cds; coord=5:200912768..200917534:-1; parent\_gene=GRMZM2G415062'

'highly similar to ( 598) AT3G27820 | Symbols: ATMDAR4, MDAR4 | MDAR4 (MONODEHYDROASCORBATE REDUCTASE 4); monodehydroascorbate reductase (NADH) | chr3:10315249-10317881 FORWARDmoderately similar to ( 436) MDARS\_CUCSA Monodehydroascorbate reductase, seedling isozyme (EC 1.6.5.4) (MDAR seedling) (Ascorbate free radical reductase seedling) (AFR reductase seedling) - Cucumis sativus (Cucumber)highly similar to ( 760) loc\_os02g47800 12002.m09814 protein monodehydroascorbate reductase, cytoplasmic isoform 2, putative, expressed seq=cds; coord=5:201264863..201269869:-1; parent\_gene=GRMZM2G320307'

'highly similar to ( 993) AT4G16660 | Symbols: | heat shock protein 70, putative / HSP70, putative | chr4:9377225-9381232 FORWARDmoderately similar to ( 216) BIP4\_TOBAC Luminal-binding protein 4 precursor (BiP 4) (78 kDa glucose-regulated protein homolog 4) (GRP 78-4) - Nicotiana tabacum (Common tobacco)nearly identical (1311) loc\_os02g48110 12002.m09845 protein oxygen-regulated protein precursor, putative, expressed seq=cds; coord=5:202050924..202059781:1; parent\_gene=GRMZM2G020040'

'weakly similar to ( 157) AT2G46620 | Symbols: | AAA-type ATPase family protein | chr2:19139071-19140546 REVERSEmoderately similar to ( 280) loc\_os03g02330 12003.m05775 protein ATP binding protein, putative, expressed seq=cds; coord=5:210728409..210730929:-1; parent\_gene=GRMZM2G403454'

'very weakly similar to ( 100) AT4G31580 | Symbols: SRZ-22, SRZ22, RSZP22 | SRZ-22; protein binding | chr4:15306983-15308064 FORWARDweakly similar to ( 120) loc\_os02g54770 12002.m33468 protein splicing factor, arginine/serine-rich 7, putative, expressed seq=cds; coord=5:213034925..213038562:-1; parent\_gene=GRMZM2G080930'

'moderately similar to ( 348) AT2G25620 | Symbols: | protein phosphatase 2C, putative / PP2C, putative | chr2:10903154-10904978 REVERSEhighly similar to ( 585) loc\_os02g55560 12002.m100396 protein DNA-binding protein phosphatase 2C, putative, expressed seq=cds; coord=5:214092148..214098979:1; parent\_gene=GRMZM2G180430'

'moderately similar to ( 250) AT1G48110 | Symbols: ECT7 | ECT7 (evolutionarily conserved C-terminal region 7) | chr1:17770339-17772806 REVERSEhighly similar to ( 732) loc\_os01g22630 12001.m42647 protein YT521-B-like family protein, expressed seq=cds; coord=6:1281657..1287910:1; parent\_gene=GRMZM2G098174'

'moderately similar to ( 377) AT1G71980 | Symbols: | protease-associated zinc finger (C3HC4-type RING finger) family protein | chr1:27098250-27099881 FORWARDhighly similar to ( 561) loc\_os03g07130 12003.m101101 protein RING finger protein 13, putative, expressed seq=cds; coord=6:1334626..1338778:1; parent\_gene=GRMZM2G423956'

'weakly similar to ( 171) AT2G34730 | Symbols: | myosin heavy chain-related | chr2:14654611-14657443 FORWARDhighly similar to ( 645) loc\_os09g04810 12009.m50204 protein myosin heavy chain, putative, expressed seq=cds; coord=6:9190508..9194532:-1; parent\_gene=GRMZM2G066400'

'moderately similar to ( 228) loc\_os09g01140 12009.m60283 protein expressed protein seq=cds; coord=6:19962512..19966575:-1; parent\_gene=GRMZM2G392516'

'highly similar to ( 555) AT5G48730 | Symbols: | pentatricopeptide (PPR) repeat-containing protein | chr5:19763152-19765136 FORWARDweakly similar to ( 127) RF1\_ORYSA Rf1 protein, mitochondrial precursor (PPR protein) (Fertility restorer) (Restorer for CMS) - *Oryza sativa* (Rice)highly similar to ( 807) loc\_os06g07550 12006.m05478 protein PPR2, putative, expressed seq=cds; coord=6:122582429..122585001:1; parent\_gene=GRMZM2G071162'

'weakly similar to ( 161) AT3G55280 | Symbols: RPL23AB | RPL23AB (RIBOSOMAL PROTEIN L23AB); RNA binding / nucleotide binding / structural constituent of ribosome | chr3:20500667-20501519 FORWARDweakly similar to ( 167) RL23A\_TOBAC 60S ribosomal protein L23a (L25) - *Nicotiana tabacum* (Common tobacco)weakly similar to ( 180) loc\_os04g42270 12004.m35367 protein 60S ribosomal protein L23a, putative, expressed seq=cds; coord=6:123201350..123203341:1; parent\_gene=GRMZM2G166659'

'moderately similar to ( 263) AT1G14290 | Symbols: SBH2 | SBH2 (SPHINGOID BASE HYDROXYLASE 2); catalytic/ sphingosine hydroxylase | chr1:4880307-4881784 REVERSEmoderately similar to ( 300) loc\_os06g22490 12006.m06903 protein protein SUR2, putative seq=cds; coord=6:157166978..157168162:-1; parent\_gene=GRMZM2G163008'

'highly similar to ( 653) AT1G48900 | Symbols: | signal recognition particle 54 kDa protein 3 / SRP54 (SRP-54C) | chr1:18085031-18087743 REVERSEhighly similar to ( 698) SR542\_HORVU Signal recognition particle 54 kDa protein 2 (SRP54) - Hordeum vulgare (Barley)highly similar to ( 696) loc\_os01g56600 12001.m11817 protein signal recognition particle 54 kDa protein 2, putative, expressed seq=cds; coord=6:157823781..157828193:-1; parent\_gene=GRMZM2G060324'

'weakly similar to ( 143) AT5G57625 | Symbols: | allergen V5/Tpx-1-related family protein | chr5:23337865-23338577 FORWARDweakly similar to ( 177) PR13\_HORVU Pathogenesis-related protein PRB1-3 precursor (PR-1B) (HV-8) - Hordeum vulgare (Barley)weakly similar to ( 194) loc\_os07g03710 12007.m04841 protein pathogenesis-related protein PRB1-3 precursor, putative, expressed seq=cds; coord=7:3483732..3484794:1; parent\_gene=GRMZM2G465226'

'moderately similar to ( 361) AT2G47170 | Symbols: ARF1A1C | ARF1A1C; GTP binding / phospholipase activator/protein binding | chr2:19367264-19368518 FORWARDmoderately similar to ( 355) ARF\_VIGUN ADP-ribosylation factor - Vigna unguiculata (Cowpea)moderately similar to ( 365) loc\_os07g12200 12007.m05673 protein ADP-ribosylation factor 1, putative, expressed seq=cds; coord=7:20165377..20168407:1; parent\_gene=GRMZM2G105996'

'weakly similar to ( 150) AT5G28050 | Symbols: | cytidine/deoxycytidylate deaminase family protein | chr5:10044209-10045484 REVERSEweakly similar to ( 161) loc\_os07g14150 12007.m079579 protein cytidine/deoxycytidylate deaminase family protein, putative, expressed seq=cds; coord=7:24368445..24370041:1; parent\_gene=GRMZM2G173063'

'weakly similar to ( 160) AT4G34960 | Symbols: | peptidyl-prolyl cis-trans isomerase, putative / cyclophilin, putative / rotamase, putative | chr4:16648865-16650646 FORWARDweakly similar to ( 102) CYPH\_MAIZE Peptidyl-prolyl cis-trans isomerase (EC 5.2.1.8) (PPIase) (Rotamase) (Cyclophilin) (Cyclosporin A-binding protein) - Zea mays (Maize)weakly similar to ( 175) loc\_os09g36670 12009.m06616 protein peptidyl-prolyl cis-trans isomerase CYP19-4 precursor, putative, expressed seq=cds; coord=7:30423336..30427964:1; parent\_gene=GRMZM2G092072'

'moderately similar to ( 250) AT1G05700 | Symbols: | leucine-rich repeat protein kinase, putative | chr1:1709796-1713245 FORWARDweakly similar to ( 125) NORK\_MEDTR Nodulation receptor kinase precursor (EC 2.7.11.1) (Does not make infections protein 2) (Symbiosis receptor-like kinase) (MtSYM RK) - Medicago truncatula (Barrel medic)moderately similar to ( 439) loc\_os09g19140 12009.m05122 protein senescence-induced receptor-like serine/threonine-protein kinase precursor, putative seq=cds; coord=7:95446340..95451284:-1; parent\_gene=GRMZM2G354615'

'moderately similar to ( 336) AT2G20890 | Symbols: PSB29, THF1 | PSB29 | chr2:8987783-8989185 FORWARDmoderately similar to ( 417) THF1\_ORYSA Protein THYLAKOID FORMATION1, chloroplast precursor Oryza sativa (Rice)moderately similar to ( 417) loc\_os07g37250 12007.m07975 protein chloroplast-localized Ptr ToxA-binding protein1, putative, expressed seq=cds; coord=7:157278232..157282868:-1; parent\_gene=GRMZM2G033493'

'moderately similar to ( 336) AT2G20890 | Symbols: PSB29, THF1 | PSB29 | chr2:8987783-8989185 FORWARDmoderately similar to ( 417) THF1\_ORYSA Protein THYLAKOID FORMATION1, chloroplast precursor Oryza sativa (Rice)moderately similar to ( 417) loc\_os07g37250 12007.m07975 protein chloroplast-localized Ptr ToxA-binding protein1, putative, expressed seq=cds; coord=7:157278232..157282868:-1; parent\_gene=GRMZM2G033493'

'moderately similar to ( 206) AT4G14540 | Symbols: NF-YB3 | NF-YB3 (NUCLEAR FACTOR Y, SUBUNIT B3); transcription factor | chr4:8344663-8345148 FORWARDweakly similar to ( 185) NFBYB\_MAIZE Nuclear transcription factor Y subunit B (NF-YB) (CAAT-box DNA-binding protein subunit B) - Zea mays (Maize)moderately similar to ( 226) loc\_os03g29970 12003.m08258 protein nuclear transcription factor Y subunit B-3, putative, expressed seq=cds; coord=7:164694042..164695458:-1; parent\_gene=GRMZM2G384528'

'nearly identical (1023) AT3G02050 | Symbols: KUP3, ATKUP3, ATKT4 | KUP3 (K

'highly similar to ( 580) AT5G58380 | Symbols: CIPK10, PKS2, SIP1, SNRK3.8 | SIP1 (SOS3-INTERACTING PROTEIN 1); ATP binding / kinase/ protein kinase/ protein serine/threonine kinase | chr5:23597092-23598531 REVERSEmoderately similar to ( 454) CIPK1\_ORYSA CIPK-like protein 1 (EC 2.7.11.1) (OsCK1) - Oryza sativa (Rice)highly similar to ( 744) loc\_os07g48100 12007.m09025 protein CBL-interacting serine/threonine-protein kinase 15, putative, expressed seq=cds; coord=7:172925400..172928378:-1; parent\_gene=GRMZM2G166658'

'moderately similar to ( 308) AT1G55545 | Symbols: | unknown protein | chr1:20738987-20743049 REVERSEmoderately similar to ( 387) loc\_os07g48602 12007.m66702 protein EMB1011, putative, expressed seq=cds; coord=7:173827304..173838463:-1; parent\_gene=AC155434.2\_FG004'

'moderately similar to ( 308) AT1G55545 | Symbols: | unknown protein | chr1:20738987-20743049 REVERSEmoderately similar to ( 387) loc\_os07g48602 12007.m66702 protein EMB1011, putative, expressed seq=cds; coord=7:173827304..173838463:-1; parent\_gene=AC155434.2\_FG004'

'moderately similar to ( 311) AT3G20770 | Symbols: EIN3 | EIN3 (ETHYLENE-INSENSITIVE3); transcription factor chr3:7260702-7262588 REVERSEmoderately similar to ( 433) loc\_os07g48630 12007.m29024 protein ETHYLENE-INSENSITIVE3-like 1 protein, putative, expressed seq=cds; coord=7:173951359..173953387:-1; parent\_gene=GRMZM2G151811'

'moderately similar to ( 447) AT3G14067 | Symbols: | subtilase family protein | chr3:4658421-4660754 REVERSEhighly similar to ( 798) loc\_os07g48650 12007.m09076 protein xylem serine proteinase 1 precursor, putative, expressed seq=cds; coord=7:174029436..174031718:1; parent\_gene=GRMZM2G059165'

'weakly similar to ( 187) AT2G17730 | Symbols: | zinc finger (C3HC4-type RING finger) family protein | chr2:7704142-7705312 FORWARDmoderately similar to ( 202) loc\_os06g50370 12006.m09561 protein RING-H2 finger protein ATL2B, putative, expressed seq=cds; coord=7:175204235..175205552:1; parent\_gene=GRMZM2G440866'

'very weakly similar to (90.1) AT2G32300 | Symbols: UCC1 | UCC1 (UCLACYANIN 1); copper ion binding / electron carrier | chr2:13722510-13723464 FORWARDvery weakly similar to (89.7) BCP\_PEA Blue copper protein precursor - Pisum sativum (Garden pea)weakly similar to ( 147) loc\_os09g36940 12009.m06643 protein blue copper binding protein, putative, expressed seq=cds; coord=7:175397827..175398686:1; parent\_gene=GRMZM2G086628'

'moderately similar to ( 458) AT5G66120 | Symbols: | 3-dehydroquinate synthase, putative | chr5:26431516-26433649 REVERSEhighly similar to ( 510) loc\_os09g36800 12009.m06629 protein 3-dehydroquinate synthase, putative, expressed seq=cds; coord=7:175831402..175835185:1; parent\_gene=GRMZM2G051129'

'moderately similar to ( 311) AT3G16565 | Symbols: | ATP binding / alanine-tRNA ligase/ ligase, forming aminoacyl-tRNA and related compounds / nucleic acid binding / nucleotide binding | chr3:5640531-5642675

REVERSEmoderately similar to ( 409) loc\_os01g03030 12001.m06942 protein alanyl-tRNA synthetase, putative, expressed seq=cds; coord=8:10082012..10085602:-1; parent\_gene=GRMZM2G140754'

'weakly similar to ( 196) loc\_os01g03170 12001.m06956 protein seven in absentia protein family protein, expressed seq=cds; coord=8:10855642..10857439:1; parent\_gene=GRMZM2G049661'

'moderately similar to ( 449) AT1G18390 | Symbols: | ATP binding / kinase/ protein kinase/ protein serine/threonine kinase/ protein tyrosine kinase | chr1:6327463-6329935 FORWARDmoderately similar to ( 222) CRI4\_MAIZE Putative receptor protein kinase CRINKLY4 precursor (EC 2.7.11.1) - Zea mays (Maize)highly similar to ( 698) loc\_os01g04409 12001.m07075 protein OsWAK1 - OsWAK receptor-like cytoplasmic kinase (OsWAK-RLCK), expressed seq=cds; coord=8:13203175..13210491:1; parent\_gene=GRMZM2G171807'

'weakly similar to ( 125) AT2G37150 | Symbols: | zinc finger (C3HC4-type RING finger) family protein | chr2:15603748-15605988 REVERSEmoderately similar to ( 425) loc\_os01g06590 12001.m42872 protein protein containing C-terminal RING-finger, putative, expressed seq=cds; coord=8:15468054..15475632:-1; parent\_gene=GRMZM2G305901'

'weakly similar to ( 147) AT5G14540 | Symbols: | proline-rich family protein | chr5:4687333-4689624 REVERSEhighly similar to ( 557) loc\_os01g07520 12001.m07378 protein proline-rich protein, putative, expressed seq=cds; coord=8:16994084..16999444:-1; parent\_gene=GRMZM2G025215'

'nearly identical (1420) AT2G06990 | Symbols: HEN2 | HEN2 (hua enhancer 2); ATP-dependent helicase/ RNA helicase | chr2:2895135-2900909 FORWARDnearly identical (1658) loc\_os11g07500 12011.m079953 protein helicase C6F12.16c, putative, expressed seq=cds; coord=8:18967013..18976088:1; parent\_gene=GRMZM2G047949'

'moderately similar to ( 345) AT2G27360 | Symbols: | lipase, putative | chr2:11706233-11707905 FORWARDweakly similar to ( 184) EST\_HEVBR Esterase precursor (EC 3.1.1.-) (Early nodule-specific protein homolog) (Latex allergen Hev b 13) - Hevea brasiliensis (Para rubber tree)highly similar to ( 678) loc\_os01g42730 12001.m10537 protein alpha-L-fucosidase 2 precursor, putative, expressed seq=cds; coord=8:142977440..142982997:1; parent\_gene=GRMZM2G117754'

'moderately similar to ( 265) AT3G57170 | Symbols: | N-acetylglucosaminyl transferase component family protein / Gpi1 family protein | chr3:21159620-21162259 REVERSEweakly similar to ( 187) loc\_os05g22370 12005.m27768 protein N-acetylglucosaminyl transferase component, putative, expressed seq=cds; coord=8:161880772..161882765:1; parent\_gene=GRMZM2G070898'

'moderately similar to ( 214) AT3G25220 | Symbols: FKBP15-1 | FKBP15-1; FK506 binding / peptidyl-prolyl cis-trans isomerase | chr3:9182691-9184463 FORWARDmoderately similar to ( 203) FKB15\_VICFA FK506-binding protein 2 precursor (EC 5.2.1.8) (Peptidyl-prolyl cis-trans isomerase) (PPIase) (Rotamase) (15 kDa FKBP) (FKBP-15) - Vicia faba (Broad bean)moderately similar to ( 248) loc\_os01g68710 12001.m150820 protein FK506-binding protein 2-1 precursor, putative, expressed seq=cds; coord=8:162534879..162538967:1; parent\_gene=GRMZM2G031204'

'highly similar to ( 568) AT4G25360 | Symbols: | INVOLVED IN: biological\_process unknown; EXPRESSED IN: 22 plant structures; EXPRESSED DURING: 13 growth stages; CONTAINS InterPro DOMAIN/s: Protein of unknown function DUF231, plant (InterPro:IPR004253); BEST Arabidopsis thaliana protein match is: YLS7 (TAIR:AT5G51640.1); Has 699 Blast hits to 688 proteins in 15 species: Archae - 0; Bacteria - 0; Metazoa - 0; Fungi - 0; Plants - 699; Viruses - 0; Other Eukaryotes - 0 (source: NCBI BLINK). | chr4:12970187-12972404 FORWARDhighly similar to ( 754) loc\_os01g68630 12001.m12965 protein expressed protein seq=cds; coord=8:162665398..162668419:-1; parent\_gene=GRMZM2G096169'

'moderately similar to ( 480) AT2G19490 | Symbols: | recA family protein | chr2:8441732-8444006 FORWARDhighly similar to ( 627) loc\_os01g67510 12001.m12855 protein DNA repair protein recA homolog 3, putative, expressed seq=cds; coord=8:163890807..163895364:1; parent\_gene=GRMZM2G700757'

'very weakly similar to (81.6) AT3G16490 | Symbols: IQD26 | IQD26 (IQ-domain 26); calmodulin binding | chr3:5603962-5605489 REVERSEweakly similar to ( 197) loc\_os01g53980 12001.m11562 protein calmodulin binding protein, putative, expressed seq=cds; coord=8:175150778..175151936:-1; parent\_gene=AC203173.3\_FG001'

'weakly similar to ( 191) AT1G24090 | Symbols: | RNase H domain-containing protein | chr1:8520834-8524690 FORWARDmoderately similar to ( 281) loc\_os06g13010 12006.m06017 protein nucleic acid binding protein, putative, expressed seq=cds; coord=9:2485121..2487554:-1; parent\_gene=GRMZM2G016275'

'weakly similar to ( 109) AT1G28210 | Symbols: ATJ1 | ATJ1; heat shock protein binding / nucleic acid binding / unfolded protein binding / zinc ion binding | chr1:9854598-9859977 FORWARDweakly similar to ( 149) loc\_os06g11440 12006.m32015 protein transposon protein, putative, Mutator sub-class, expressed seq=cds; coord=9:6826102..6839564:-1; parent\_gene=GRMZM2G097620'

'nearly identical (1504) AT5G65460 | Symbols: | kinesin motor protein-related | chr5:26161831-26169001 REVERSEweakly similar to ( 138) FLA10\_CHLRE Kinesin-like protein FLA10 (Protein KHP1) - Chlamydomonas reinhardtiihighly similar to ( 894) loc\_os06g11380 12006.m05855 protein ATP binding protein, putative, expressed seq=cds; coord=9:7186959..7210629:-1; parent\_gene=GRMZM2G017257'

'moderately similar to ( 429) AT2G05940 | Symbols: | protein kinase, putative | chr2:2287514-2289270 REVERSEmoderately similar to ( 218) NORK\_MEDTR Nodulation receptor kinase precursor (EC 2.7.11.1) (Does not make infections protein 2) (Symbiosis receptor-like kinase) (MtSYMRK) - Medicago truncatula (Barrel medic)highly similar to ( 616) loc\_os06g10160 12006.m05734 protein protein kinase APK1A, chloroplast precursor, putative, expressed seq=cds; coord=9:10125256..10127926:1; parent\_gene=GRMZM2G055982'

'moderately similar to ( 233) AT5G16770 | Symbols: AtMYB9 | AtMYB9 (myb domain protein 9); DNA binding / transcription factor | chr5:5515209-5516734 FORWARDmoderately similar to ( 205) ODO1\_PETHY ODORANT1 protein (MYB-like protein ODO1) - Petunia hybrida (Petunia)moderately similar to ( 296) loc\_os06g02250 12006.m04959 protein transcription factor MYB102, putative seq=cds; coord=9:26630516..26631917:1; parent\_gene=GRMZM2G044824'

'moderately similar to ( 233) AT5G16770 | Symbols: AtMYB9 | AtMYB9 (myb domain protein 9); DNA binding / transcription factor | chr5:5515209-5516734 FORWARDmoderately similar to ( 205) ODO1\_PETHY ODORANT1 protein (MYB-like protein ODO1) - Petunia hybrida (Petunia)moderately similar to ( 296) loc\_os06g02250 12006.m04959 protein transcription factor MYB102, putative seq=cds; coord=9:26630516..26631917:1; parent\_gene=GRMZM2G044824'

'weakly similar to ( 127) AT5G34930 | Symbols: | arogenate dehydrogenase | chr5:13233391-13235522  
FORWARDweakly similar to ( 181) loc\_os06g35050 12006.m08042 protein arogenate dehydrogenase isoform 2,  
putative, expressed seq=cds; coord=9:61355950..61358310:-1; parent\_gene=GRMZM2G324297'

'highly similar to ( 693) AT4G39800 | Symbols: MI-1-P SYNTHASE, MIPS1, ATMIPS1 | MIPS1 (MYO-INOSITOL-1  
PHOSPHATE SYNTHASE 1); inositol-3-phosphate synthase | chr4:18469659-18471893 REVERSEhighly similar to ( 735) INO1\_MAIZE Inositol-3-phosphate synthase (EC 5.5.1.4) (Myo-inositol-1-phosphate synthase) (MI-1-P  
synthase) (IPS) - Zea mays (Maize)highly similar to ( 732) loc\_os03g09250 12003.m35064 protein inositol-3-  
phosphate synthase, putative, expressed seq=cds; coord=9:149240772..149244235:1;  
parent\_gene=GRMZM2G004528'

'moderately similar to ( 417) AT2G25100 | Symbols: | ribonuclease HII family protein | chr2:10679767-10681654  
REVERSEhighly similar to ( 537) loc\_os11g05570 12011.m04754 protein ribonuclease HI large subunit, putative,  
expressed seq=cds; coord=10:5896223..5900069:1; parent\_gene=GRMZM2G065804'

'weakly similar to ( 139) AT1G18480 | Symbols: | calcineurin-like phosphoesterase family protein | chr1:6361639-  
6362814 FORWARDmoderately similar to ( 205) loc\_os11g15570 12011.m05691 protein expressed protein seq=cds;  
coord=10:53139082..53141917:1; parent\_gene=GRMZM2G459370'

'moderately similar to ( 202) AT3G59550 | Symbols: SYN3, ATRAD21.2, ATSYN3 | SYN3 | chr3:21997262-  
22000496 FORWARDhighly similar to ( 589) loc\_os08g16610 12008.m26637 protein sister chromatid cohesion 1  
protein 3, putative, expressed seq=cds; coord=10:42878927..42884133:1; parent\_gene=GRMZM2G074818'

'highly similar to ( 615) AT1G31830 | Symbols: | amino acid permease family protein | chr1:11418875-11420314  
REVERSEhighly similar to ( 795) loc\_os03g37984 12003.m35295 protein cationic amino acid transporter, putative,  
expressed seq=cds; coord=10:76224116..76227981:-1; parent\_gene=GRMZM2G078292'

'highly similar to ( 543) AT1G07590 | Symbols: | pentatricopeptide (PPR) repeat-containing protein | chr1:2336649-  
2338481 REVERSEhighly similar to ( 751) loc\_os08g06500 12008.m04789 protein expressed protein seq=cds;  
coord=10:76508485..76510356:-1; parent\_gene=GRMZM2G145130'

'moderately similar to ( 349) AT3G62260 | Symbols: | protein phosphatase 2C, putative / PP2C, putative |  
chr3:23038516-23040391 REVERSEhighly similar to ( 525) loc\_os05g04360 12005.m04969 protein protein  
phosphatase 2C homolog 2, putative, expressed seq=cds; coord=10:85581746..85584681:1;  
parent\_gene=GRMZM2G060798'

'moderately similar to ( 256) AT5G01670 | Symbols: | aldose reductase, putative | chr5:252000-253856  
FORWARDmoderately similar to ( 339) ALDR\_HORVU Aldose reductase (EC 1.1.1.21) (AR) (Aldehyde reductase) -  
Hordeum vulgare (Barley)moderately similar to ( 335) loc\_os04g50790 12004.m35440 protein nucleic acid binding  
protein, putative, expressed seq=cds; coord=10:138493023..138500137:-1; parent\_gene=AF466202.2\_FG007'



'nearly identical (1069) AT5G64570 | Symbols: XYLA, ATBXL4 | XYLA; hydrolase, hydrolyzing O-glycosyl compounds / xylan 1,4-beta-xylosidase | chr5:25810227-25813309 REVERSEmoderately similar to ( 468) XYNB\_PRUPE Putative beta-D-xylosidase (EC 3.2.1.-) (PpAz152) (Fragment) - Prunus persica (Peach)nearly identical (1342) loc\_os04g54810 12004.m10373 protein beta-D-xylosidase, putative, expressed seq=cds; coord=10:144683393..144689170:-1; parent\_gene=GRMZM2G136895'

'weakly similar to ( 169) AT4G25540 | Symbols: MSH3, ATMSH3 | MSH3 (Arabidopsis homolog of DNA mismatch repair protein MSH3); damaged DNA binding / mismatched DNA binding / protein binding | chr4:13042700-13048115 REVERSEmoderately similar to ( 311) loc\_os04g58630 12004.m101699 protein DNA mismatch repair protein MSH3, putative, expressed seq=cds; coord=10:148589707..148592889:-1; parent\_gene=GRMZM2G093623'

'moderately similar to ( 484) AT2G27050 | Symbols: EIL1 | EIL1 (ETHYLENE-INSENSITIVE3-LIKE 1); transcription factor/ transcription regulator | chr2:11546314-11548068 FORWARDhighly similar to ( 991) loc\_os03g20790 12003.m07486 protein ETHYLENE-INSENSITIVE3-like 1 protein, putative, expressed seq=cds; coord=1:52564282..52568326:-1; parent\_gene=GRMZM2G033570'

'weakly similar to ( 159) AT5G55670 | Symbols: | RNA recognition motif (RRM)-containing protein | chr5:22544669-22546801 REVERSEmoderately similar to ( 216) loc\_os08g38240 12008.m26723 protein cleavage and polyadenylation specificity factor 6, putative, expressed seq=cds; coord=1:182898704..182903336:-1; parent\_gene=GRMZM2G107163'

'weakly similar to ( 159) AT5G55670 | Symbols: | RNA recognition motif (RRM)-containing protein | chr5:22544669-22546801 REVERSEmoderately similar to ( 216) loc\_os08g38240 12008.m26723 protein cleavage and polyadenylation specificity factor 6, putative, expressed seq=cds; coord=1:182898704..182903336:-1; parent\_gene=GRMZM2G107163'

'moderately similar to ( 478) AT4G39170 | Symbols: | SEC14 cytosolic factor, putative / phosphoglyceride transfer protein, putative | chr4:18240887-18243621 FORWARDhighly similar to ( 889) loc\_os08g38850 12008.m26728 protein phosphatidylinositol transporter/ transporter, putative, expressed seq=cds; coord=1:183807049..183811940:-1; parent\_gene=GRMZM2G113840'

'highly similar to ( 835) AT1G28440 | Symbols: HSL1 | HSL1 (HAESA-Like 1); ATP binding / kinase/ protein serine/threonine kinase | chr1:9996914-10000171 FORWARDmoderately similar to ( 416) RPK1\_IPONI Receptor-like protein kinase precursor (EC 2.7.11.1) - Ipomoea nil (Japanese morning glory) (Pharbitis nil)nearly identical (1223) loc\_os08g28870 12008.m06892 protein receptor-like protein kinase 5 precursor, putative, expressed seq=cds; coord=1:220056861..220060238:1; parent\_gene=GRMZM2G136353'

'moderately similar to ( 332) AT5G33320 | Symbols: CUE1, PPT, ARAPPT | CUE1 (CAB UNDEREXPRESSED 1); antiporter/ triose-phosphate transmembrane transporter | chr5:12588950-12591408 FORWARDweakly similar to ( 177) TPT\_SOLTU Triose phosphate/phosphate translocator, chloroplast precursor (cTPT) (E29) - Solanum tuberosum (Potato)moderately similar to ( 422) loc\_os08g25624 12008.m26834 protein triose phosphate/phosphate translocator, non-green plastid,chloroplast precursor, putative, expressed seq=cds; coord=1:221486173..221490380:1; parent\_gene=GRMZM2G174107'

'nearly identical (1679) AT4G38190 | Symbols: ATCSLD4, CSLD4 | ATCSLD4; cellulose synthase/ transferase, transferring glycosyl groups | chr4:17910096-17913641 REVERSEnearly identical (1967) loc\_os08g25710 12008.m06587 protein CSLD3 - cellulose synthase-like family D, expressed seq=cds; coord=1:221785673..221789403:1; parent\_gene=GRMZM2G044269'

'moderately similar to ( 206) AT3G01080 | Symbols: WRKY58, ATWRKY58 | WRKY58; transcription factor | chr3:25507-27449 FORWARDweakly similar to ( 184) loc\_os03g55164 12003.m101731 protein OsWRKY4 - Superfamily of rice TFs having WRKY and zinc finger domains, expressed seq=cds; coord=1:278602439..278604715:1; parent\_gene=GRMZM2G008029'

'moderately similar to ( 294) AT1G73110 | Symbols: | ribulose biphosphate carboxylase/oxygenase activase, putative / RuBisCO activase, putative | chr1:27494344-27496844 REVERSEmoderately similar to ( 202) RCA\_MAIZE Ribulose biphosphate carboxylase/oxygenase activase, chloroplast precursor (RuBisCO activase) (RA) - Zea mays (Maize)moderately similar to ( 344) loc\_os04g56320 12004.m10522 protein ribulose biphosphate carboxylase/oxygenase activase, chloroplast precursor, putative, expressed seq=cds; coord=2:4159971..4163217:1; parent\_gene=GRMZM2G039345'

'moderately similar to ( 294) AT1G73110 | Symbols: | ribulose biphosphate carboxylase/oxygenase activase, putative / RuBisCO activase, putative | chr1:27494344-27496844 REVERSEmoderately similar to ( 202) RCA\_MAIZE Ribulose biphosphate carboxylase/oxygenase activase, chloroplast precursor (RuBisCO activase) (RA) - Zea mays (Maize)moderately similar to ( 344) loc\_os04g56320 12004.m10522 protein ribulose biphosphate carboxylase/oxygenase activase, chloroplast precursor, putative, expressed seq=cds; coord=2:4159971..4163217:1; parent\_gene=GRMZM2G039345'

'very weakly similar to (96.7) AT5G25190 | Symbols: | ethylene-responsive element-binding protein, putative | chr5:8707007-8707655 REVERSEweakly similar to ( 121) loc\_os04g56150 12004.m10506 protein ethylene-responsive transcription factor 4, putative seq=cds; coord=2:4347237..4347860:1; parent\_gene=GRMZM2G067463'

'moderately similar to ( 295) AT2G37190 | Symbols: | 60S ribosomal protein L12 (RPL12A) | chr2:15619559-15620059 REVERSEmoderately similar to ( 246) RL12\_CHLRE 60S ribosomal protein L12 (Fragment) - Chlamydomonas reinhardtii/moderately similar to ( 314) loc\_os04g50990 12004.m09996 protein 60S ribosomal protein L12, putative, expressed seq=cds; coord=2:12677824..12680299:-1; parent\_gene=GRMZM2G149649'

'moderately similar to ( 338) AT5G64440 | Symbols: AtFAAH | AtFAAH (Arabidopsis thaliana fatty acid amide hydrolase); N-(long-chain-acyl)ethanolamine deacylase/ amidase | chr5:25766229-25770260 FORWARDhighly similar to ( 616) loc\_os11g06900 12011.m04887 protein N-acylethanolamine amidohydrolase, putative, expressed seq=cds; coord=2:136348649..136351410:-1; parent\_gene=GRMZM2G053466'

'highly similar to ( 688) AT2G03890 | Symbols: | phosphatidylinositol 3- and 4-kinase family protein | chr2:1186199-1188151 FORWARDhighly similar to ( 948) loc\_os09g29890 12009.m22000 protein phosphatidylinositol 3- and 4-kinase family protein, expressed seq=cds; coord=2:188414700..188417396:-1; parent\_gene=GRMZM2G137558'

'weakly similar to ( 130) AT1G56170 | Symbols: HAP5B, ATHAP5B, NF-YC2 | NF-YC2 (NUCLEAR FACTOR Y, SUBUNIT C2); DNA binding / transcription activator/ transcription factor | chr1:21025118-21025717 FORWARDweakly similar to ( 141) loc\_os09g30310 12009.m06182 protein nuclear transcription factor Y subunit C-2, putative, expressed seq=cds; coord=2:189204687..189208176:-1; parent\_gene=GRMZM2G022162'

'moderately similar to ( 492) AT4G12570 | Symbols: UPL5 | UPL5 (UBIQUITIN PROTEIN LIGASE 5); acid-amino acid ligase/ binding / ubiquitin-protein ligase | chr4:7445585-7448819 FORWARDhighly similar to ( 917) loc\_os09g31090 12009.m22004 protein HECT-domain, putative, expressed seq=cds; coord=2:189501893..189517266:-1; parent\_gene=GRMZM2G080439'

'moderately similar to ( 492) AT4G12570 | Symbols: UPL5 | UPL5 (UBIQUITIN PROTEIN LIGASE 5); acid-amino acid ligase/ binding / ubiquitin-protein ligase | chr4:7445585-7448819 FORWARDhighly similar to ( 917) loc\_os09g31090 12009.m22004 protein HECT-domain, putative, expressed seq=cds; coord=2:189501893..189517266:-1; parent\_gene=GRMZM2G080439'

'moderately similar to ( 492) AT4G12570 | Symbols: UPL5 | UPL5 (UBIQUITIN PROTEIN LIGASE 5); acid-amino acid ligase/ binding / ubiquitin-protein ligase | chr4:7445585-7448819 FORWARDhighly similar to ( 917) loc\_os09g31090 12009.m22004 protein HECT-domain, putative, expressed seq=cds; coord=2:189501893..189517266:-1; parent\_gene=GRMZM2G080439'

'moderately similar to ( 492) AT4G12570 | Symbols: UPL5 | UPL5 (UBIQUITIN PROTEIN LIGASE 5); acid-amino acid ligase/ binding / ubiquitin-protein ligase | chr4:7445585-7448819 FORWARDhighly similar to ( 917) loc\_os09g31090 12009.m22004 protein HECT-domain, putative, expressed seq=cds; coord=2:189501893..189517266:-1; parent\_gene=GRMZM2G080439'

'weakly similar to ( 189) AT5G08565 | Symbols: | positive transcription elongation factor/ zinc ion binding | chr5:2775964-2777154 FORWARDmoderately similar to ( 223) loc\_os07g43060 12007.m08534 protein transcription elongation factor SPT4 homolog 1, putative, expressed seq=cds; coord=2:212361624..212366846:-1; parent\_gene=GRMZM2G086805'

'moderately similar to ( 201) AT4G16270 | Symbols: | peroxidase 40 (PER40) (P40) | chr4:9205038-9206483 FORWARDmoderately similar to ( 214) PERX\_NICSY Lignin-forming anionic peroxidase precursor (EC 1.11.1.7) - Nicotiana glauca (Wood tobacco)moderately similar to ( 298) loc\_os07g44460 12007.m08667 protein peroxidase 66 precursor, putative seq=cds; coord=2:213071989..213073476:-1; parent\_gene=GRMZM2G156257'

'weakly similar to ( 156) AT2G03500 | Symbols: | myb family transcription factor | chr2:1059926-1062259 FORWARDmoderately similar to ( 367) loc\_os07g02800 12007.m29048 protein myb-like DNA-binding domain, SHAQKYF class family protein, expressed seq=cds; coord=2:236187625..236189534:-1; parent\_gene=GRMZM2G173882'

'weakly similar to ( 128) AT5G64810 | Symbols: WRKY51, ATWRKY51 | WRKY51; transcription factor | chr5:25908415-25909687 FORWARDweakly similar to ( 199) loc\_os01g51690 12001.m11347 protein OsWRKY26 - Superfamily of rice TFs having WRKY and zinc finger domains, expressed seq=cds; coord=3:203083255..203084247:1; parent\_gene=GRMZM2G101405'

'moderately similar to ( 329) AT2G34480 | Symbols: | 60S ribosomal protein L18A (RPL18aB) | chr2:14532916-14534161 REVERSEmoderately similar to ( 355) RL18A\_ORYSA 60S ribosomal protein L18a - Oryza sativa (Rice)moderately similar to ( 363) loc\_os05g49030 12005.m08974 protein 60S ribosomal protein L18a, putative, expressed seq=cds; coord=3:210714346..210715729:1; parent\_gene=AC230013.2\_FG007'

'weakly similar to ( 117) AT2G25355 | Symbols: | exonuclease-related | chr2:10801567-10803591 FORWARDweakly similar to ( 136) loc\_os01g66730 12001.m150798 protein exosome complex exonuclease RRP40, putative, expressed seq=cds; coord=3:211858569..211859522:-1; parent\_gene=GRMZM2G173989'

'moderately similar to ( 260) AT1G69640 | Symbols: SBH1 | SBH1 (SPHINGOID BASE HYDROXYLASE 1); catalytic/ sphingosine hydroxylase | chr1:26193933-26195466 REVERSEmoderately similar to ( 354) loc\_os01g46940 12001.m10891 protein protein SUR2, putative, expressed seq=cds; coord=3:212266422..212268831:-1; parent\_gene=GRMZM2G003526'

'moderately similar to ( 260) AT1G69640 | Symbols: SBH1 | SBH1 (SPHINGOID BASE HYDROXYLASE 1); catalytic/ sphingosine hydroxylase | chr1:26193933-26195466 REVERSEmoderately similar to ( 354) loc\_os01g46940 12001.m10891 protein protein SUR2, putative, expressed seq=cds; coord=3:212266422..212268831:-1; parent\_gene=GRMZM2G003526'

'very weakly similar to ( 100) AT4G11140 | Symbols: CRF1 | CRF1 (CYTOKININ RESPONSE FACTOR 1); DNA binding / transcription factor | chr4:6794930-6795793 REVERSEvery weakly similar to (86.3) ERF3\_TOBAC Ethylene-responsive transcription factor 3 (Ethylene-responsive element-binding factor 3 homolog) (EREBP-5) (NtERF5) - Nicotiana tabacum (Common tobacco)moderately similar to ( 298) loc\_os01g46870 12001.m10884 protein ap2 domain protein, putative, expressed seq=cds; coord=3:212501262..212503692:1; parent\_gene=GRMZM2G160971'

'moderately similar to ( 259) AT5G41790 | Symbols: CIP1 | CIP1 (COP1-INTERACTIVE PROTEIN 1); protein binding | chr5:16727530-16732391 FORWARDweakly similar to ( 117) MFP1\_TOBAC MAR-binding filament-like protein 1-1 - Nicotiana tabacum (Common tobacco)highly similar to ( 836) loc\_os01g46810 12001.m10878 protein viral A-type inclusion protein repeat containing protein, expressed seq=cds; coord=3:212694107..212699938:1; parent\_gene=GRMZM2G118403'

'highly similar to ( 868) AT3G58610 | Symbols: | ketol-acid reductoisomerase | chr3:21671561-21674639 FORWARDhighly similar to ( 858) ILV5\_PEA Ketol-acid reductoisomerase, chloroplast precursor (EC 1.1.1.86) (Acetohydroxy-acid reductoisomerase) (Alpha-keto-beta-hydroxylacil reductoisomerase) - Pisum sativum (Garden pea)highly similar to ( 920) loc\_os01g46380 12001.m10836 protein ketol-acid reductoisomerase, chloroplast precursor, putative, expressed seq=cds; coord=3:213623450..213627174:-1; parent\_gene=GRMZM2G004382'

'moderately similar to ( 410) AT4G18550 | Symbols: | lipase class 3 family protein | chr4:10225006-10226862 REVERSEhighly similar to ( 642) loc\_os01g46240 12001.m10822 protein triacylglycerol lipase, putative, expressed seq=cds; coord=3:214200908..214203537:1; parent\_gene=GRMZM2G153672'

'highly similar to ( 749) AT1G15500 | Symbols: ATNTT2 | ATNTT2; ATP:ADP antiporter | chr1:5326426-5328688 FORWARDhighly similar to ( 753) TLC1\_SOLTU Plastidic ATP/ADP-transporter - Solanum tuberosum (Potato)highly similar to ( 887) loc\_os01g45910 12001.m10791 protein plastidic ATP/ADP-transporter, putative, expressed seq=cds; coord=3:214471264..214476975:1; parent\_gene=GRMZM2G064473'

'highly similar to ( 749) AT1G15500 | Symbols: ATNTT2 | ATNTT2; ATP:ADP antiporter | chr1:5326426-5328688 FORWARDhighly similar to ( 753) TLC1\_SOLTU Plastidic ATP/ADP-transporter - Solanum tuberosum (Potato)highly similar to ( 887) loc\_os01g45910 12001.m10791 protein plastidic ATP/ADP-transporter, putative, expressed seq=cds; coord=3:214471264..214476975:1; parent\_gene=GRMZM2G064473'

'moderately similar to ( 260) AT5G14740 | Symbols: CA2, CA18, BETA CA2 | CA2 (CARBONIC ANHYDRASE 2); carbonate dehydratase/ zinc ion binding | chr5:4758257-4762315 FORWARDmoderately similar to ( 338) CAHC\_HORVU Carbonic anhydrase, chloroplast precursor (EC 4.2.1.1) (Carbonate dehydratase) - Hordeum vulgare (Barley)moderately similar to ( 331) loc\_os01g45274 12001.m150428 protein carbonic anhydrase, chloroplast precursor, putative, expressed seq=cds; coord=3:215425032..215437638:-1; parent\_gene=GRMZM2G348512'

'weakly similar to ( 128) loc\_os04g34984 12004.m08591 protein UBP27, putative, expressed seq=cds; coord=3:216795952..216802947:-1; parent\_gene=GRMZM2G064283'

'moderately similar to ( 260) AT5G42050 | Symbols: | FUNCTIONS IN: molecular\_function unknown; EXPRESSED IN: 22 plant structures; EXPRESSED DURING: 13 growth stages; CONTAINS InterPro DOMAIN/s: Development and cell death domain (InterPro:IPR013989), Kelch related (InterPro:IPR013089); BEST Arabidopsis thaliana protein match is: unknown protein (TAIR:AT3G27090.1); Has 5084 Blast hits to 2870 proteins in 85 species: Archae - 0; Bacteria - 24; Metazoa - 270; Fungi - 58; Plants - 157; Viruses - 8; Other Eukaryotes - 4567 (source: NCBI BLINK). | chr5:16815630-16816932 FORWARDmoderately similar to ( 262) B2\_DAUCA B2 protein - Daucus carota (Carrot)moderately similar to ( 355) loc\_os01g36950 12001.m150623 protein N-rich protein, putative, expressed seq=cds; coord=3:226769338..226771691:-1; parent\_gene=GRMZM2G071154'

'highly similar to ( 539) AT2G26460 | Symbols: | RED family protein | chr2:11255049-11258913 REVERSEhighly similar to ( 744) loc\_os11g04950 12011.m04693 protein expressed protein seq=cds; coord=3:229657774..229664681:-1; parent\_gene=GRMZM2G015592'

'weakly similar to ( 147) AT5G18280 | Symbols: ATAPY2, APY2 | ATAPY2 (ARABIDOPSIS THALIANA APYRASE 2); ATPase/ nucleotide diphosphatase | chr5:6050799-6054875 REVERSEweakly similar to ( 120) NTPA\_PEA Nucleoside-triphosphatase (EC 3.6.1.15) (Nucleoside triphosphate phosphohydrolase) (NTPase) (Apyrase) - Pisum sativum (Garden pea)weakly similar to ( 195) loc\_os07g48430 12007.m29410 protein nucleoside-triphosphatase, putative, expressed seq=cds; coord=4:115030232..115033238:-1; parent\_gene=GRMZM2G106618'

'highly similar to ( 520) AT1G10940 | Symbols: ASK1, SNRK2-4, SNRK2.4, SRK2A | SNRK2.4 (SNF1-RELATED PROTEIN KINASE 2.4); kinase | chr1:3656050-3658170 REVERSEhighly similar to ( 596) SAPK7\_ORYSA Serine/threonine-protein kinase SAPK7 (EC 2.7.11.1) (Osmotic stress/abscisic acid-activated protein kinase 7) - Oryza sativa (Rice)highly similar to ( 596) loc\_os04g35240 12004.m08614 protein serine/threonine-protein kinase SAPK7, putative, expressed seq=cds; coord=4:115154220..115165298:-1; parent\_gene=GRMZM2G130018'

'moderately similar to ( 255) AT4G06634 | Symbols: | zinc finger (C2H2 type) family protein | chr4:3764499-3766177 REVERSEmoderately similar to ( 355) loc\_os02g34680 12002.m08557 protein transcription repressor TRM protein, putative, expressed seq=cds; coord=4:115429773..115432652:1; parent\_gene=GRMZM2G140016'

'moderately similar to ( 255) AT4G06634 | Symbols: | zinc finger (C2H2 type) family protein | chr4:3764499-3766177 REVERSEmoderately similar to ( 355) loc\_os02g34680 12002.m08557 protein transcription repressor TRM protein, putative, expressed seq=cds; coord=4:115429773..115432652:1; parent\_gene=GRMZM2G140016'

'nearly identical (1232) AT1G77760 | Symbols: NIA1, GNR1, NR1 | NIA1 (NITRATE REDUCTASE 1); nitrate reductase | chr1:29236005-29239367 REVERSEnearly identical (1540) NIA7\_HORVU Nitrate reductase [NAD(P)H] (EC 1.7.1.2) - Hordeum vulgare (Barley)nearly identical (1573) loc\_os02g53130 12002.m10342 protein nitrate reductase, putative, expressed seq=cds; coord=4:177655913..177659763:1; parent\_gene=GRMZM2G428027'

'highly similar to ( 503) AT2G03220 | Symbols: FT1, ATFUT1, ATFT1, MUR2 | FT1 (FUCOSYLTRANSFERASE 1); fucosyltransferase/ transferase, transferring glycosyl groups | chr2:970401-972353 REVERSEhighly similar to ( 513) FUT1\_PEA Galactoside 2-alpha-L-fucosyltransferase (EC 2.4.1.69) (Xyloglucan alpha-(1,2)-fucosyltransferase) (PsFT1) - Pisum sativum (Garden pea)highly similar to ( 697) loc\_os02g52630 12002.m10293 protein fucosyltransferase 7, putative, expressed seq=cds; coord=4:178596383..178598254:-1; parent\_gene=GRMZM2G471594'

'weakly similar to ( 177) AT4G09650 | Symbols: ATPD | ATPD (ATP SYNTHASE DELTA-SUBUNIT GENE); hydrogen ion transporting ATP synthase, rotational mechanism / proton-transporting ATPase, rotational mechanism | chr4:6100799-6101503 FORWARDmoderately similar to ( 273) ATPD\_SORBI ATP synthase delta chain, chloroplast precursor (EC 3.6.3.14) - Sorghum bicolor (Sorghum) (Sorghum vulgare)moderately similar to ( 256) loc\_os02g51470 12002.m33873 protein ATP synthase delta chain, chloroplast precursor, putative, expressed seq=cds; coord=4:181429409..181431608:-1; parent\_gene=GRMZM2G025171'

'weakly similar to ( 177) AT4G09650 | Symbols: ATPD | ATPD (ATP SYNTHASE DELTA-SUBUNIT GENE); hydrogen ion transporting ATP synthase, rotational mechanism / proton-transporting ATPase, rotational mechanism | chr4:6100799-6101503 FORWARDmoderately similar to ( 273) ATPD\_SORBI ATP synthase delta chain, chloroplast precursor (EC 3.6.3.14) - Sorghum bicolor (Sorghum) (Sorghum vulgare)moderately similar to ( 256) loc\_os02g51470 12002.m33873 protein ATP synthase delta chain, chloroplast precursor, putative, expressed seq=cds; coord=4:181429409..181431608:-1; parent\_gene=GRMZM2G025171'

'moderately similar to ( 433) AT5G59250 | Symbols: | sugar transporter family protein | chr5:23903958-23906853 FORWARDvery weakly similar to (94.4) HEX6\_RICCO Hexose carrier protein HEX6 - Ricinus communis (Castor bean)highly similar to ( 506) loc\_os03g60820 12003.m10970 protein sugar transporter family protein, putative, expressed seq=cds; coord=5:2181480..2183903:1; parent\_gene=GRMZM2G085301'

'moderately similar to ( 433) AT5G59250 | Symbols: | sugar transporter family protein | chr5:23903958-23906853 FORWARDvery weakly similar to (94.4) HEX6\_RICCO Hexose carrier protein HEX6 - Ricinus communis (Castor bean)highly similar to ( 506) loc\_os03g60820 12003.m10970 protein sugar transporter family protein, putative, expressed seq=cds; coord=5:2181480..2183903:1; parent\_gene=GRMZM2G085301'

'moderately similar to ( 459) AT3G51120 | Symbols: | DNA binding / nucleic acid binding / protein binding / zinc ion binding | chr3:18986026-18991886 REVERSEnearly identical (1229) loc\_os10g36810 12010.m06486 protein plus-3 domain containing protein, expressed seq=cds; coord=5:22737810..22750836:-1; parent\_gene=GRMZM2G078379'

'highly similar to ( 647) AT4G04950 | Symbols: | thioredoxin family protein | chr4:2517882-2519924 REVERSEhighly similar to ( 820) loc\_os10g35720 12010.m22006 protein OsGrx\_S17 - glutaredoxin subgroup II, expressed seq=cds; coord=5:24436192..24442540:-1; parent\_gene=GRMZM2G090736'

'highly similar to ( 670) AT5G23190 | Symbols: CYP86B1 | CYP86B1; electron carrier/ heme binding / iron ion binding / monooxygenase/ oxygen binding | chr5:7803478-7805659 REVERSEweakly similar to ( 114) C97B2\_SOYBN Cytochrome P450 97B2 (EC 1.14.-.-) - Glycine max (Soybean)highly similar to ( 830) loc\_os10g34480 12010.m06272 protein cytochrome P450 86A2, putative, expressed seq=cds; coord=5:26443691..26446113:1; parent\_gene=GRMZM2G013082'

'weakly similar to ( 108) AT1G77670 | Symbols: | aminotransferase class I and II family protein | chr1:29189043-29190901 REVERSEmoderately similar to ( 301) loc\_os10g34350 12010.m06261 protein kynurenine--oxoglutarate transaminase 1, putative, expressed seq=cds; coord=5:27099256..27102677:1; parent\_gene=GRMZM2G174145'

'highly similar to ( 629) AT1G59900 | Symbols: AT-E1 ALPHA | AT-E1 ALPHA; oxidoreductase, acting on the aldehyde or oxo group of donors, disulfide as acceptor / pyruvate dehydrogenase (acetyl-transferring) | chr1:22051368-22053660 FORWARDhighly similar to ( 631) ODPAL\_SOLTU Pyruvate dehydrogenase E1 component subunit alpha, mitochondrial precursor (EC 1.2.4.1) (PDHE1-A) - Solanum tuberosum (Potato)highly similar to ( 712) loc\_os02g50620 12002.m10096 protein pyruvate dehydrogenase E1 component alpha subunit, mitochondrial precursor, putative, expressed seq=cds; coord=5:205777032..205781614:-1; parent\_gene=GRMZM2G140150'

'weakly similar to ( 132) AT1G78080 | Symbols: RAP2.4 | RAP2.4 (related to AP2 4); DNA binding / transcription factor | chr1:29364790-29365794 FORWARDmoderately similar to ( 202) loc\_os02g51670 12002.m10198 protein AP2 domain-containing protein, putative, expressed seq=cds; coord=5:208162767..208165707:1; parent\_gene=GRMZM2G055204'

'weakly similar to ( 167) AT1G78260 | Symbols: | RNA recognition motif (RRM)-containing protein | chr1:29447317-29449246 FORWARDmoderately similar to ( 315) loc\_os02g51890 12002.m10220 protein RNA-binding region-containing protein 1, putative, expressed seq=cds; coord=5:208556725..208565590:1; parent\_gene=GRMZM2G303915'

'highly similar to ( 565) AT1G73400 | Symbols: | pentatricopeptide (PPR) repeat-containing protein | chr1:27598412-27599812 FORWARDweakly similar to ( 137) RF1\_ORYSA Rf1 protein, mitochondrial precursor (PPR protein) (Fertility restorer) (Restorer for CMS) - Oryza sativa (Rice)highly similar to ( 868) loc\_os02g52220 12002.m33882 protein ATP binding protein, putative, expressed seq=cds; coord=5:208957884..208961357:1; parent\_gene=GRMZM2G161175'

'highly similar to ( 527) AT4G30340 | Symbols: ATDGK7 | ATDGK7 (Diacylglycerol kinase 7); diacylglycerol kinase chr4:14838465-14840941 REVERSEhighly similar to ( 728) loc\_os02g54650 12002.m10494 protein diacylglycerol kinase, putative, expressed seq=cds; coord=5:212754787..212763972:-1; parent\_gene=GRMZM2G128214'

'moderately similar to ( 420) AT1G12420 | Symbols: ACR8 | ACR8; amino acid binding | chr1:4226673-4228917 REVERSEhighly similar to ( 526) loc\_os08g02500 12008.m04394 protein ACR8, putative seq=cds; coord=6:5641494..5643748:1; parent\_gene=GRMZM2G034404'

'weakly similar to ( 118) AT4G33865 | Symbols: | 40S ribosomal protein S29 (RPS29C) | chr4:16233395-16234114 REVERSEweakly similar to ( 129) loc\_os11g41610 12011.m08002 protein 40S ribosomal protein S29, putative, expressed seq=cds; coord=6:22305548..22307139:-1; parent\_gene=GRMZM2G060373'

'very weakly similar to (93.2) AT3G54360 | Symbols: | protein binding / zinc ion binding | chr3:20128570-20131581 REVERSEweakly similar to ( 115) loc\_os02g55200 12002.m33471 protein expressed protein seq=cds; coord=6:27809738..27811273:-1; parent\_gene=GRMZM2G101662'

'moderately similar to ( 248) AT3G63460 | Symbols: | WD-40 repeat family protein | chr3:23431009-23437241 REVERSEmoderately similar to ( 410) loc\_os07g46370 12007.m08854 protein EMB2221, putative, expressed seq=cds; coord=7:44760619..44768892:1; parent\_gene=GRMZM2G435661'

'weakly similar to ( 146) loc\_os12g37830 12012.m07569 protein transposon protein, putative, Ac/Ds sub-class seq=cds; coord=7:100267155..100284846:1; parent\_gene=GRMZM2G436649'

'moderately similar to ( 382) AT4G34880 | Symbols: | amidase family protein | chr4:16615549-16617424  
FORWARDhighly similar to ( 588) loc\_os04g10460 12004.m06299 protein amidase, putative, expressed seq=cds;  
coord=7:148453586..148456184:-1; parent\_gene=GRMZM2G111309'

'moderately similar to ( 362) AT2G41835 | Symbols: | zinc finger (C2H2 type, AN1-like) family protein |  
chr2:17458020-17459414 REVERSEhighly similar to ( 510) loc\_os07g38240 12007.m08071 protein AN1-type zinc  
finger protein 2B, putative, expressed seq=cds; coord=7:158951176..158954111:1; parent\_gene=GRMZM2G081782'

'moderately similar to ( 475) AT2G43750 | Symbols: OASB, ACS1, CPACS1, ATCS-B | OASB (O-ACETYLSERINE  
(THIOL) LYASE B); cysteine synthase | chr2:18129604-18132322 REVERSEmoderately similar to ( 486)  
CYSKP\_SOLTU Cysteine synthase, chloroplast precursor (EC 2.5.1.47) (O-acetylserine sulfhydrylase) (O-acetylserine  
(Thiol)-lyase) (CSase B) (CS-B) (OAS-TL B) - Solanum tuberosum (Potato)highly similar to ( 541) loc\_os01g74650  
12001.m42813 protein cysteine synthase, mitochondrial precursor, putative, expressed seq=cds;  
coord=8:6464565..6468039:1; parent\_gene=GRMZM2G082185'

'moderately similar to ( 475) AT2G43750 | Symbols: OASB, ACS1, CPACS1, ATCS-B | OASB (O-ACETYLSERINE  
(THIOL) LYASE B); cysteine synthase | chr2:18129604-18132322 REVERSEmoderately similar to ( 486)  
CYSKP\_SOLTU Cysteine synthase, chloroplast precursor (EC 2.5.1.47) (O-acetylserine sulfhydrylase) (O-acetylserine  
(Thiol)-lyase) (CSase B) (CS-B) (OAS-TL B) - Solanum tuberosum (Potato)highly similar to ( 541) loc\_os01g74650  
12001.m42813 protein cysteine synthase, mitochondrial precursor, putative, expressed seq=cds;  
coord=8:6464565..6468039:1; parent\_gene=GRMZM2G082185'

'moderately similar to ( 261) AT1G19600 | Symbols: | pfkB-type carbohydrate kinase family protein | chr1:6779085-  
6780898 FORWARDmoderately similar to ( 317) loc\_os01g01620 12001.m06807 protein ribokinase, putative,  
expressed seq=cds; coord=8:7516007..7520374:-1; parent\_gene=GRMZM2G051842'

'weakly similar to ( 153) loc\_os05g35274 12005.m083726 protein RNA recognition motif-containing protein, putative,  
expressed seq=cds; coord=8:102262870..102264589:-1; parent\_gene=GRMZM2G111596'

'weakly similar to ( 168) AT1G65620 | Symbols: AS2 | AS2 (ASYMMETRIC LEAVES 2); protein binding |  
chr1:24400146-24400745 FORWARDmoderately similar to ( 212) loc\_os01g66590 12001.m97474 protein  
ASYMMETRIC LEAVES2, putative, expressed seq=cds; coord=8:104267219..104268277:1;  
parent\_gene=GRMZM2G096064'

'moderately similar to ( 246) AT3G07880 | Symbols: | Rho GDP-dissociation inhibitor family protein | chr3:2514175-  
2515544 FORWARDmoderately similar to ( 345) loc\_os01g68540 12001.m12957 protein rho GDP-dissociation  
inhibitor 1, putative, expressed seq=cds; coord=8:110142652..110144824:1; parent\_gene=GRMZM2G150724'

'weakly similar to ( 166) AT5G53190 | Symbols: | nodulin MtN3 family protein | chr5:21572417-21574284  
REVERSEmoderately similar to ( 253) loc\_os05g12320 12005.m05698 protein mtN3 protein-like, putative, expressed  
seq=cds; coord=8:112530662..112532375:1; parent\_gene=GRMZM2G179679'



'highly similar to ( 789) AT2G20370 | Symbols: KAM1, MUR3 | MUR3 (MURUS 3); catalytic/ transferase, transferring glycosyl groups | chr2:8792355-8794214 FORWARDhighly similar to ( 914) KATAM\_ORYSA Xyloglucan galactosyltransferase KATAMARI1 homolog (EC 2.4.1.-) - Oryza sativa (Rice)highly similar to ( 938) loc\_os03g05110 12003.m06035 protein xyloglucan galactosyltransferase KATAMARI 1, putative, expressed seq=cds; coord=9:152250791..152253278:1; parent\_gene=GRMZM2G137779'

'moderately similar to ( 454) AT3G52780 | Symbols: ATPAP20, PAP20 | PAP20; acid phosphatase/ protein serine/threonine phosphatase | chr3:19561812-19564195 REVERSEmoderately similar to ( 230) PPAF\_SOYBN Purple acid phosphatase precursor (EC 3.1.3.2) (Manganese(II) purple acid phosphatase) - Glycine max (Soybean)highly similar to ( 628) loc\_os11g05410 12011.m079939 protein hydrolase/ protein serine/threonine phosphatase, putative, expressed seq=cds; coord=10:5222440..5225078:1; parent\_gene=GRMZM2G434170'

'moderately similar to ( 454) AT3G52780 | Symbols: ATPAP20, PAP20 | PAP20; acid phosphatase/ protein serine/threonine phosphatase | chr3:19561812-19564195 REVERSEmoderately similar to ( 230) PPAF\_SOYBN Purple acid phosphatase precursor (EC 3.1.3.2) (Manganese(II) purple acid phosphatase) - Glycine max (Soybean)highly similar to ( 628) loc\_os11g05410 12011.m079939 protein hydrolase/ protein serine/threonine phosphatase, putative, expressed seq=cds; coord=10:5222440..5225078:1; parent\_gene=GRMZM2G434170'

'weakly similar to ( 143) AT4G19810 | Symbols: | glycosyl hydrolase family 18 protein | chr4:10764151-10765753 REVERSEmoderately similar to ( 437) loc\_os04g30770 12004.m08181 protein hydrolase, hydrolyzing O-glycosyl compounds, putative, expressed seq=cds; coord=10:107900408..107902133:1; parent\_gene=GRMZM2G090441'

'very weakly similar to (81.3) AT5G42020 | Symbols: BIP | BIP2; ATP binding | chr5:16807697-16810480 REVERSEvery weakly similar to (84.7) BIP4\_TOBAC Luminal-binding protein 4 precursor (BiP 4) (78 kDa glucose-regulated protein homolog 4) (GRP 78-4) - Nicotiana tabacum (Common tobacco)weakly similar to ( 172) loc\_os06g10990 12006.m05816 protein luminal-binding protein precursor, putative, expressed seq=cds; coord=10:121369850..121371290:-1; parent\_gene=GRMZM2G135608'

'weakly similar to ( 152) AT1G25682 | Symbols: | cell cycle control protein-related | chr1:9002532-9004550 REVERSEmoderately similar to ( 236) loc\_os02g21880 12002.m33662 protein coiled-coil domain-containing protein 94, putative, expressed seq=cds; coord=10:144134861..144135949:1; parent\_gene=GRMZM2G000650'

'weakly similar to ( 152) AT1G25682 | Symbols: | cell cycle control protein-related | chr1:9002532-9004550 REVERSEmoderately similar to ( 236) loc\_os02g21880 12002.m33662 protein coiled-coil domain-containing protein 94, putative, expressed seq=cds; coord=10:144134861..144135949:1; parent\_gene=GRMZM2G000650'

'moderately similar to ( 206) AT2G44050 | Symbols: COS1 | COS1 (COI1 SUPPRESSOR1); 6,7-dimethyl-8-ribityllumazine synthase | chr2:18224304-18225917 FORWARDweakly similar to ( 184) RISB\_SPIOL 6,7-dimethyl-8-ribityllumazine synthase, chloroplast precursor (EC 2.5.1.9) (DMRL synthase) (Lumazine synthase) - Spinacia oleracea (Spinach)moderately similar to ( 262) loc\_os04g42000 12004.m09174 protein 6,7-dimethyl-8-ribityllumazine synthase, chloroplast precursor, putative, expressed seq=cds; coord=10:145895417..145903773:1; parent\_gene=GRMZM2G143480'

'moderately similar to ( 338) AT1G52520 | Symbols: FRS6 | FRS6 (FAR1-related sequence 6); zinc ion binding | chr1:19565933-19568248 FORWARDweakly similar to ( 136) NCPR\_CATRO NADPH--cytochrome P450 reductase (EC 1.6.2.4) (CPR) (P450R) - Catharanthus roseus (Rosy periwinkle) (Madagascar periwinkle)nearly identical (1222) loc\_os07g31420 12007.m07411 protein transposon protein, putative, unclassified, expressed seq=cds; coord=10:146108256..146114652:1; parent\_gene=GRMZM2G104268'

'weakly similar to ( 160) AT3G53160 | Symbols: UGT73C7 | UGT73C7 (UDP-glucosyl transferase 73C7); UDP-glycosyltransferase/ transferase, transferring glycosyl groups | chr3:19702485-19703957 REVERSEweakly similar to ( 126) ZOX\_PHAVU Zeatin O-xylosyltransferase (EC 2.4.2.40) (Zeatin O-beta-D-xylosyltransferase) - Phaseolus vulgaris (Kidney bean) (French bean)moderately similar to ( 380) loc\_os03g46400 12003.m09658 protein flavonol-3-O-glycoside-7-O-glucosyltransferase 1, putative, expressed seq=cds; coord=10:146643280..146645035:1; parent\_gene=GRMZM2G067424'

'nearly identical (1680) AT5G65930 | Symbols: ZWI, PKCBP, KCBP | ZWI (ZWICHEL); calmodulin binding / microtubule motor | chr5:26370369-26376394 REVERSEmoderately similar to ( 217) FLA10\_CHLRE Kinesin-like protein FLA10 (Protein KHP1) - Chlamydomonas reinhardtii nearly identical (2143) loc\_os04g57140 12004.m10599 protein kinesin-like calmodulin binding protein, putative, expressed seq=cds; coord=10:147187794..147201486:-1; parent\_gene=GRMZM2G423861'

'moderately similar to ( 257) AT3G10620 | Symbols: ATNUDX26 | ATNUDX26 (ARABIDOPSIS THALIANA NUDIX HYDROLASE HOMOLOG 26); bis(5'-adenosyl)-pentaphosphatase/ bis(5'-nucleosyl)-tetraphosphatase (asymmetrical) | chr3:3320263-3321565 FORWARDmoderately similar to ( 315) loc\_os04g58900 12004.m10770 protein expressed protein seq=cds; coord=10:148849233..148855901:1; parent\_gene=GRMZM2G406074'

'highly similar to ( 580) AT2G02860 | Symbols: SUT2, ATSUC3, SUC3, ATSUT2 | SUT2 (SUCROSE TRANSPORTER 2); carbohydrate transmembrane transporter/ sucrose transmembrane transporter/ sucrose:hydrogen symporter/ sugar:hydrogen symporter | chr2:828546-832296 REVERSEmoderately similar to ( 424) SUT2\_ORYSA Sucrose transport protein 2 (Sucrose permease 2) (Sucrose-proton symporter 2) (Sucrose transporter 2) (SUC4-like protein) - Oryza sativa (Rice)highly similar to ( 907) loc\_os03g07480 12003.m35039 protein sucrose Transporter, putative, expressed seq=cds; coord=1:15069803..15075192:-1; parent\_gene=GRMZM2G034302'

'moderately similar to ( 459) AT5G12040 | Symbols: | carbon-nitrogen hydrolase family protein | chr5:3885162-3887772 FORWARDhighly similar to ( 506) loc\_os03g07910 12003.m06302 protein expressed protein seq=cds; coord=1:15990466..15997559:1; parent\_gene=GRMZM2G156486'

'moderately similar to ( 459) AT5G12040 | Symbols: | carbon-nitrogen hydrolase family protein | chr5:3885162-3887772 FORWARDhighly similar to ( 506) loc\_os03g07910 12003.m06302 protein expressed protein seq=cds; coord=1:15990466..15997559:1; parent\_gene=GRMZM2G156486'

'moderately similar to ( 320) AT5G06060 | Symbols: | tropinone reductase, putative / tropine dehydrogenase, putative | chr5:1824066-1825833 REVERSEvery weakly similar to (96.7) GRDH\_ORYSA Glucose and ribitol dehydrogenase homolog (EC 1.1.1.-) - Oryza sativa (Rice)moderately similar to ( 390) loc\_os03g16220 12003.m101290 protein tropinone reductase, putative, expressed seq=cds; coord=1:39213217..39219522:-1; parent\_gene=GRMZM2G141799'

'highly similar to ( 787) AT5G60020 | Symbols: LAC17, ATLAC17 | LAC17 (laccase 17); laccase | chr5:24168072-24170223 FORWARDmoderately similar to ( 205) ASO\_CUCMA L-ascorbate oxidase precursor (EC 1.10.3.3) (Ascorbase) (ASO) - Cucurbita maxima (Pumpkin) (Winter squash)highly similar to ( 934) loc\_os03g16610 12003.m07094 protein L-ascorbate oxidase precursor, putative, expressed seq=cds; coord=1:39928338..39931744:-1; parent\_gene=GRMZM2G305526'

'highly similar to ( 742) AT2G44900 | Symbols: | armadillo/beta-catenin repeat family protein / F-box family protein | chr2:18511719-18515762 REVERSEhighly similar to ( 532) loc\_os10g41360 12010.m06900 protein ubiquitin-protein ligase, putative, expressed seq=cds; coord=1:93491345..93506165:1; parent\_gene=GRMZM2G079031'

'moderately similar to ( 461) AT4G00460 | Symbols: ATROPGEF3, ROPGEF3 | Rho guanyl-nucleotide exchange factor | chr4:211146-213094 REVERSEhighly similar to ( 660) loc\_os10g40270 12010.m06799 protein pollen-specific kinase partner protein, putative, expressed seq=cds; coord=1:88011829..88014372:-1; parent\_gene=GRMZM2G071157'

'highly similar to ( 860) AT1G73080 | Symbols: PEPR1 | PEPR1 (PEP1 receptor 1); ATP binding / kinase/ protein binding / protein serine/threonine kinase | chr1:27484513-27488021 FORWARDhighly similar to ( 947) RPK1\_IPONI Receptor-like protein kinase precursor (EC 2.7.11.1) - Ipomoea nil (Japanese morning glory) (Pharbitis nil)nearly identical (1470) loc\_os08g34640 12008.m07452 protein receptor-like protein kinase precursor, putative, expressed seq=cds; coord=1:210594694..210598577:-1; parent\_gene=GRMZM2G428554'

'moderately similar to ( 284) AT5G25530 | Symbols: | DNAJ heat shock protein, putative | chr5:8889665-8890954 REVERSEvery weakly similar to (87.0) DNJH\_CUCSA DnaJ protein homolog (DNAJ-1) - Cucumis sativus (Cucumber)moderately similar to ( 380) loc\_os08g28700 12008.m06875 protein dnaJ homolog subfamily B member 1, putative, expressed seq=cds; coord=1:220116293..220118099:1; parent\_gene=GRMZM2G047153'

'moderately similar to ( 284) AT5G25530 | Symbols: | DNAJ heat shock protein, putative | chr5:8889665-8890954 REVERSEvery weakly similar to (87.0) DNJH\_CUCSA DnaJ protein homolog (DNAJ-1) - Cucumis sativus (Cucumber)moderately similar to ( 380) loc\_os08g28700 12008.m06875 protein dnaJ homolog subfamily B member 1, putative, expressed seq=cds; coord=1:220116293..220118099:1; parent\_gene=GRMZM2G047153'

'moderately similar to ( 409) loc\_os10g37570 12010.m06544 protein F-box domain containing protein, expressed seq=cds; coord=1:222945692..222947391:-1; parent\_gene=GRMZM2G067626'

'very weakly similar to (91.3) AT2G28710 | Symbols: | zinc finger (C2H2 type) family protein | chr2:12322974-12323444 FORWARDweakly similar to ( 134) loc\_os03g60540 12003.m10943 protein zinc finger, C2H2 type family protein seq=cds; coord=1:293139250..293139702:-1; parent\_gene=GRMZM2G061897'

'moderately similar to ( 402) AT4G28510 | Symbols: ATPHB1 | ATPHB1 (PROHIBITIN 1) | chr4:14084970-14086372 REVERSEmoderately similar to ( 436) loc\_os03g62490 12003.m11125 protein mitochondrial prohibitin complex protein 2, putative, expressed seq=cds; coord=1:296891350..296893628:-1; parent\_gene=AC217358.3\_FG005'

'weakly similar to ( 135) AT3G48100 | Symbols: ARR5, ATRR2, IBC6 | ARR5 (ARABIDOPSIS RESPONSE REGULATOR 5); transcription regulator/ two-component response regulator | chr3:17759112-17760740 REVERSEweakly similar to ( 189) loc\_os04g57720 12004.m10657 protein OsRR6 - Rice type-A response regulator, expressed seq=cds; coord=2:2081848..2082630:-1; parent\_gene=GRMZM2G040736'

'highly similar to ( 838) AT3G20290 | Symbols: ATEHD1 | ATEHD1 (EPS15 HOMOLOGUE DOMAIN 1); GTP binding / GTPase/ calcium ion binding | chr3:7075057-7078655 REVERSEhighly similar to ( 971) loc\_os04g57350 12004.m10620 protein EH-domain-containing protein 1, putative, expressed seq=cds; coord=2:2631218..2635350:-1; parent\_gene=GRMZM2G065012'

'nearly identical (1518) AT4G30190 | Symbols: AHA2, PMA2 | AHA2; ATPase/ hydrogen-exporting ATPase, phosphorylative mechanism | chr4:14770820-14775920 REVERSEnearly identical (1675) PMA1\_ORYSA Plasma membrane ATPase (EC 3.6.3.6) (Proton pump) - Oryza sativa (Rice)nearly identical (1675) loc\_os04g56160 12004.m101441 protein plasma membrane ATPase, putative, expressed seq=cds; coord=2:4299718..4306692:-1; parent\_gene=GRMZM2G019404'

'weakly similar to ( 177) loc\_os04g55920 12004.m35599 protein ZIM motif family protein, expressed seq=cds; coord=2:4697104..4701070:-1; parent\_gene=GRMZM2G086920'

'moderately similar to ( 204) AT3G16150 | Symbols: | L-asparaginase, putative / L-asparagine amidohydrolase, putative | chr3:5471794-5473033 FORWARDweakly similar to ( 155) ASPG\_LUPLU L-asparaginase precursor (EC 3.5.1.1) (L-asparagine amidohydrolase) [Contains: L-asparaginase subunit alpha; L-asparaginase subunit beta] - Lupinus luteus (European yellow lupin)moderately similar to ( 242) loc\_os04g55710 12004.m10462 protein transposon protein, putative, unclassified, expressed seq=cds; coord=2:5071039..5071551:-1; parent\_gene=GRMZM2G531230'

'moderately similar to ( 204) AT3G16150 | Symbols: | L-asparaginase, putative / L-asparagine amidohydrolase, putative | chr3:5471794-5473033 FORWARDweakly similar to ( 155) ASPG\_LUPLU L-asparaginase precursor (EC 3.5.1.1) (L-asparagine amidohydrolase) [Contains: L-asparaginase subunit alpha; L-asparaginase subunit beta] - Lupinus luteus (European yellow lupin)moderately similar to ( 242) loc\_os04g55710 12004.m10462 protein transposon protein, putative, unclassified, expressed seq=cds; coord=2:5071039..5071551:-1; parent\_gene=GRMZM2G531230'

'moderately similar to ( 268) AT4G36920 | Symbols: AP2, FLO2, FL1 | AP2 (APETALA 2); transcription factor | chr4:17400998-17403140 FORWARDweakly similar to ( 130) BBM2\_BRANA Protein BABY BOOM 2 (BnBBM2) - Brassica napus (Rape)moderately similar to ( 382) loc\_os04g55560 12004.m35488 protein AP2 domain containing protein, expressed seq=cds; coord=2:5514479..5518846:-1; parent\_gene=GRMZM2G174784'

'weakly similar to ( 148) AT4G24690 | Symbols: | ubiquitin-associated (UBA)/TS-N domain-containing protein / octicosapeptide/Phox/Bemp1 (PB1) domain-containing protein | chr4:12741191-12744202 FORWARDmoderately similar to ( 422) loc\_os04g40090 12004.m08993 protein zinc finger, ZZ type family protein, expressed seq=cds; coord=2:37844098..37854782:1; parent\_gene=GRMZM2G139846'

'weakly similar to ( 154) loc\_os12g06550 12012.m04645 protein expressed protein seq=cds; coord=2:52832595..52834639:-1; parent\_gene=GRMZM2G541230'

'very weakly similar to (80.9) AT3G18610 | Symbols: ATRANGAP1, PARLL1 | ATRANGAP1 (RAN GTPASE-ACTIVATING PROTEIN 1); nucleic acid binding / nucleotide binding | chr3:6404270-6407822 REVERSEweakly similar to ( 131) loc\_os08g09350 12008.m05069 protein protein gar2, putative, expressed seq=cds; coord=2:123918252..123940966:1; parent\_gene=GRMZM2G435248'

'moderately similar to ( 284) AT1G76470 | Symbols: | 3-beta-hydroxy-delta5-steroid dehydrogenase/ binding / catalytic/ cinnamoyl-CoA reductase | chr1:28689955-28691405 REVERSEweakly similar to ( 157) DFRA\_PETHY Dihydroflavonol-4-reductase (EC 1.1.1.219) (DFR) (Dihydrokaempferol 4-reductase) - Petunia hybrida (Petunia)moderately similar to ( 422) loc\_os09g31502 12009.m22008 protein dihydroflavonol-4-reductase, putative, expressed seq=cds; coord=2:190187087..190189448:-1; parent\_gene=GRMZM2G078480'

'moderately similar to ( 221) AT4G18100 | Symbols: | 60S ribosomal protein L32 (RPL32A) | chr4:10035715-10036475 REVERSEmoderately similar to ( 259) loc\_os08g41300 12008.m08108 protein 60S ribosomal protein L32, putative, expressed seq=cds; coord=2:191350704..191353166:1; parent\_gene=GRMZM2G047971'

'highly similar to ( 653) AT2G31820 | Symbols: | ankyrin repeat family protein | chr2:13530350-13532562 FORWARDhighly similar to ( 940) loc\_os09g34280 12009.m060043 protein protein binding protein, putative, expressed seq=cds; coord=2:193829792..193833616:1; parent\_gene=GRMZM2G022032'

'highly similar to ( 653) AT2G31820 | Symbols: | ankyrin repeat family protein | chr2:13530350-13532562 FORWARDhighly similar to ( 940) loc\_os09g34280 12009.m060043 protein protein binding protein, putative, expressed seq=cds; coord=2:193829792..193833616:1; parent\_gene=GRMZM2G022032'

'very weakly similar to (87.0) AT1G72310 | Symbols: ATL3 | ATL3; protein binding / zinc ion binding | chr1:27226405-27227379 FORWARDvery weakly similar to (80.9) EL5\_ORYSA E3 ubiquitin-protein ligase EL5 (EC 6.3.2.-) - Oryza sativa (Rice)weakly similar to ( 154) loc\_os07g42610 12007.m08493 protein ring-H2 zinc finger protein, putative, expressed seq=cds; coord=2:211590201..211591615:-1; parent\_gene=GRMZM2G358987'

'highly similar to ( 783) AT1G24190 | Symbols: SIN3, ATSIN3, SNL3 | SNL3 (SIN3-LIKE 3); transcription repressor | chr1:8563858-8569996 REVERSEnearly identical (1814) loc\_os01g01960 12001.m06838 protein paired amphipathic helix repeat family protein, expressed seq=cds; coord=3:28819050..28829107:-1; parent\_gene=GRMZM2G075320'

'moderately similar to ( 220) AT3G17840 | Symbols: RLK902 | RLK902; ATP binding / kinase/ protein serine/threonine kinase | chr3:6106092-6108430 FORWARDweakly similar to ( 152) NORX\_PEA Nodulation receptor kinase precursor (EC 2.7.11.1) - Pisum sativum (Garden pea)moderately similar to ( 371) loc\_os10g05400 12010.m03945 protein OsWAK102 - OsWAK receptor-like cytoplasmic kinase (OsWAK-RLCK) seq=cds; coord=3:114020698..114023620:-1; parent\_gene=GRMZM2G026203'

'moderately similar to ( 222) AT2G19770 | Symbols: PRF5 | PRF5 (PROFILIN5); actin binding / actin monomer binding | chr2:8519885-8521119 REVERSEmoderately similar to ( 263) PROFA\_ORYSA Profilin-A - Oryza sativa (Rice)moderately similar to ( 263) loc\_os10g17680 12010.m04853 protein profilin A, putative, expressed seq=cds; coord=3:199620448..199621531:-1; parent\_gene=GRMZM2G140455'

'weakly similar to ( 141) AT5G47210 | Symbols: | nuclear RNA-binding protein, putative | chr5:19169388-19171012 REVERSEmoderately similar to ( 265) loc\_os01g52390 12001.m11413 protein plasminogen activator inhibitor 1 RNA-binding protein, putative, expressed seq=cds; coord=3:202432697..202435947:1; parent\_gene=GRMZM2G055276'

'very weakly similar to (87.4) loc\_os04g24530 12004.m101489 protein 4-coumarate--CoA ligase 2, putative, expressed seq=cds; coord=3:208890114..208890945:1; parent\_gene=GRMZM2G012233'

'moderately similar to ( 452) AT2G33860 | Symbols: ETT, ARF3 | ETT (ETTIN); DNA binding / transcription factor | chr2:14325444-14328613 REVERSEhighly similar to ( 967) loc\_os01g48060 12001.m43135 protein auxin response factor 3, putative, expressed seq=cds; coord=3:210265410..210273272:1; parent\_gene=GRMZM2G437460'

'moderately similar to ( 452) AT2G33860 | Symbols: ETT, ARF3 | ETT (ETTIN); DNA binding / transcription factor | chr2:14325444-14328613 REVERSEhighly similar to ( 967) loc\_os01g48060 12001.m43135 protein auxin response factor 3, putative, expressed seq=cds; coord=3:210265410..210273272:1; parent\_gene=GRMZM2G437460'

'highly similar to ( 538) AT4G16745 | Symbols: | exostosin family protein | chr4:9412185-9414053 FORWARDhighly similar to ( 709) loc\_os01g45350 12001.m10738 protein limonene cyclase like protein, putative, expressed seq=cds; coord=3:215380332..215382314:-1; parent\_gene=GRMZM2G048010'

highly similar to ( 638) AT5G47560 | Symbols: ATTD, ATSDAT, TDT | TDT (TONOPLAST DICARBOXYLATE TRANSPORTER); malate transmembrane transporter/ sodium:dicarboxylate symporter | chr5:19287895-19290347 REVERSEhighly similar to ( 820) loc\_os08g39370 12008.m07918 protein tonoplast dicarboxylate transporter, putative, expressed seq=cds; coord=3:215902932..215905725:1; parent\_gene=GRMZM2G099382'

'highly similar to ( 515) AT1G60590 | Symbols: | polygalacturonase, putative / pectinase, putative | chr1:22314426-22316867 REVERSEmoderately similar to ( 248) PGLR\_ACTCH Polygalacturonase precursor (EC 3.2.1.15) (PG) (Pectinase) - Actinidia chinensis (Kiwi) (Yangtao)highly similar to ( 734) loc\_os01g44970 12001.m10703 protein polygalacturonase precursor, putative, expressed seq=cds; coord=3:215929238..215932695:-1; parent\_gene=GRMZM2G037431'

'weakly similar to ( 189) loc\_os01g42710 12001.m10535 protein LSD1 zinc finger family protein, expressed seq=cds; coord=3:225083458..225086011:1; parent\_gene=GRMZM2G002646'

'moderately similar to ( 323) AT1G15950 | Symbols: CCR1, IRX4, ATCCR1 | CCR1 (CINNAMOYL COA REDUCTASE 1); cinnamoyl-CoA reductase | chr1:5478855-5481949 FORWARDweakly similar to ( 171) DFRA\_MAIZE Dihydroflavonol-4-reductase (EC 1.1.1.219) (DFR) (Dihydrokaempferol 4-reductase) - Zea mays (Maize)highly similar to ( 513) loc\_os02g56460 12002.m10668 protein dihydroflavonol-4-reductase, putative, expressed seq=cds; coord=4:171783871..171785676:-1; parent\_gene=GRMZM2G099420'

'highly similar to ( 694) AT5G60710 | Symbols: | zinc finger (C3HC4-type RING finger) family protein | chr5:24410953-24414849 REVERSEnearly identical (1189) loc\_os02g56280 12002.m10651 protein protein binding protein, putative, expressed seq=cds; coord=4:172685051..172689834:1; parent\_gene=GRMZM2G130002'

'moderately similar to ( 449) AT1G22170 | Symbols: | phosphoglycerate/bisphosphoglycerate mutase family protein | chr1:7826603-7828055 FORWARDhighly similar to ( 571) loc\_os02g51590 12002.m33276 protein 2,3-bisphosphoglycerate-dependent phosphoglycerate mutase, putative, expressed seq=cds; coord=4:181228946..181231966:-1; parent\_gene=GRMZM2G021605'

'moderately similar to ( 352) AT5G58490 | Symbols: | cinnamoyl-CoA reductase family | chr5:23643068-23644455 FORWARDweakly similar to ( 154) DFRA\_VITVI Dihydroflavonol-4-reductase (EC 1.1.1.219) (DFR) (Dihydrokaempferol 4-reductase) - Vitis vinifera (Grape)moderately similar to ( 441) loc\_os03g60380 12003.m10928 protein dihydroflavonol-4-reductase, putative, expressed seq=cds; coord=5:2705885..2708336:1; parent\_gene=GRMZM2G107076'

'weakly similar to ( 174) AT4G18770 | Symbols: MYB98, AtMYB98 | MYB98 (myb domain protein 98); DNA binding / transcription factor | chr4:10311068-10312557 FORWARDvery weakly similar to (92.8) ODO1\_PETHY ODORANT1 protein (MYB-like protein ODO1) - Petunia hybrida (Petunia)moderately similar to ( 227) loc\_os12g07610 12012.m04750 protein myb family transcription factor, putative seq=cds; coord=5:4155876..4160856:1; parent\_gene=GRMZM2G302549'

'weakly similar to ( 131) AT5G14570 | Symbols: ATNRT2.7 | ATNRT2.7 (Arabidopsis thaliana high affinity nitrate transporter 2.7); nitrate transmembrane transporter | chr5:4695331-4696890 REVERSEmoderately similar to ( 214) loc\_os01g36720 12001.m09967 protein nitrate transporter, putative seq=cds; coord=5:5321650..5322849:-1; parent\_gene=GRMZM2G377555'

'moderately similar to ( 272) AT1G17810 | Symbols: BETA-TIP | BETA-TIP (BETA-TONOPLAST INTRINSIC PROTEIN); water channel | chr1:6130209-6131442 FORWARDmoderately similar to ( 379) TIP31\_ORYSA Probable aquaporin TIP3.1 (Tonoplast intrinsic protein 3.1) (OsTIP3.1) - Oryza sativa (Rice)moderately similar to ( 379) loc\_os10g35050 12010.m06328 protein aquaporin TIP3.1, putative, expressed seq=cds; coord=5:25511080..25512421:1; parent\_gene=GRMZM2G305446'

'moderately similar to ( 412) AT2G05940 | Symbols: | protein kinase, putative | chr2:2287514-2289270 REVERSEmoderately similar to ( 211) NORX\_MEDTR Nodulation receptor kinase precursor (EC 2.7.11.1) (Does not make infections protein 2) (Symbiosis receptor-like kinase) (MtSYMRK) - Medicago truncatula (Barrel medic)highly similar to ( 523) loc\_os10g25550 12010.m05501 protein serine/threonine-protein kinase NAK, putative, expressed seq=cds; coord=5:36546532..36548678:1; parent\_gene=GRMZM2G110968'

'moderately similar to ( 418) AT1G05840 | Symbols: | aspartyl protease family protein | chr1:1762843-1766150 REVERSEvery weakly similar to (98.2) ASP1\_ORYSA Aspartic proteinase Asp1 precursor (EC 3.4.23.-) (OsAsp1) (OSAP1) (Nucellin-like protein) - Oryza sativa (Rice)highly similar to ( 591) loc\_os02g27360 12002.m100207 protein pepsin A, putative, expressed seq=cds; coord=5:160161741..160166346:-1; parent\_gene=GRMZM2G411333'

'weakly similar to ( 178) loc\_os02g46220 12002.m09659 protein S-ribonuclease binding protein SBP1, putative, expressed seq=cds; coord=5:197784768..197786610:-1; parent\_gene=GRMZM2G039725'

'weakly similar to ( 178) loc\_os02g46220 12002.m09659 protein S-ribonuclease binding protein SBP1, putative, expressed seq=cds; coord=5:197784768..197786610:-1; parent\_gene=GRMZM2G039725'

'weakly similar to ( 163) loc\_os09g06740 12009.m03943 protein protein binding protein, putative, expressed seq=cds; coord=5:214077718..214078206:-1; parent\_gene=GRMZM2G467756'

'moderately similar to ( 376) AT4G27100 | Symbols: | RAB GTPase activator | chr4:13595845-13598620 FORWARDhighly similar to ( 538) loc\_os02g56570 12002.m10679 protein TBC domain containing protein, expressed seq=cds; coord=5:215006181..215011162:-1; parent\_gene=GRMZM2G150876'

'moderately similar to ( 204) AT5G36210 | Symbols: | serine-type peptidase | chr5:14248202-14253272 REVERSEmoderately similar to ( 252) loc\_os06g11180 12006.m05835 protein acyl-peptide hydrolase-like, putative, expressed seq=cds; coord=6:2047614..2057911:1; parent\_gene=GRMZM2G313321'

'weakly similar to ( 182) AT3G07370 | Symbols: ATCHIP, CHIP | CHIP (CARBOXYL TERMINUS OF HSC70-INTERACTING PROTEIN); ubiquitin-protein ligase | chr3:2358323-2360301 REVERSEmoderately similar to ( 252) loc\_os08g02140 12008.m080065 protein STIP1 homology and U box-containing protein 1, expressed seq=cds; coord=6:3643162..3647082:1; parent\_gene=GRMZM2G104769'

'weakly similar to ( 107) AT3G14250 | Symbols: | protein binding / zinc ion binding | chr3:4745963-4746958 REVERSEweakly similar to ( 193) loc\_os09g25190 12009.m05671 protein ubiquitin-protein ligase/ zinc ion binding protein, putative, expressed seq=cds; coord=6:6700670..6701561:1; parent\_gene=GRMZM2G390009'

'moderately similar to ( 414) AT2G40010 | Symbols: | 60S acidic ribosomal protein P0 (RPP0A) | chr2:16708578-16710448 REVERSEhighly similar to ( 523) RLA0\_MAIZE 60S acidic ribosomal protein P0 - Zea mays (Maize)moderately similar to ( 464) loc\_os12g03880 12012.m04384 protein 60S acidic ribosomal protein P0, putative, expressed seq=cds; coord=6:9203729..9206286:-1; parent\_gene=GRMZM2G066460'

'weakly similar to ( 170) AT5G52880 | Symbols: | F-box family protein | chr5:21432002-21433695 REVERSEmoderately similar to ( 424) loc\_os05g45040 12005.m08629 protein F-box domain containing protein, expressed seq=cds; coord=6:160000083..160005049:-1; parent\_gene=GRMZM2G004592'

'moderately similar to ( 413) AT2G19480 | Symbols: NFA02, NFA2 | NAP1;2 (NUCLEOSOME ASSEMBLY PROTEIN 1;2); DNA binding / binding | chr2:8438601-8441040 FORWARDhighly similar to ( 508) loc\_os05g46230 12005.m083791 protein expressed protein seq=cds; coord=6:161659850..161663090:-1; parent\_gene=GRMZM2G121186'

'moderately similar to ( 371) AT4G39150 | Symbols: | DNAJ heat shock N-terminal domain-containing protein | chr4:18233651-18235740 REVERSEmoderately similar to ( 478) loc\_os05g46620 12005.m08785 protein chaperone protein dnaJ 10, putative, expressed seq=cds; coord=6:162112265..162116068:-1; parent\_gene=GRMZM2G175089'

'highly similar to ( 681) AT1G27440 | Symbols: GUT2, IRX10, ATGUT1 | GUT2; catalytic/ glucuronoxylan glucuronosyltransferase | chr1:9529265-9531213 REVERSEhighly similar to ( 738) loc\_os01g70190 12001.m13067 protein secondary cell wall-related glycosyltransferase family 47, putative, expressed seq=cds; coord=6:162559883..162562784:1; parent\_gene=GRMZM2G059845'



'moderately similar to ( 223) AT4G32590 | Symbols: | ferredoxin-related | chr4:15721417-15722781  
FORWARDmoderately similar to ( 235) loc\_os05g48160 12005.m27636 protein electron carrier/ electron transporter/  
iron ion binding protein, putative, expressed seq=cds; coord=6:163178134..163181036:-1;  
parent\_gene=GRMZM2G481261'

'highly similar to ( 733) AT4G11110 | Symbols: SPA2 | SPA2 (SPA1-RELATED 2); protein binding / signal  
transducer | chr4:6772163-6776675 FORWARDmoderately similar to ( 329) COP1\_PEA E3 ubiquitin ligase protein  
COP1 (EC 6.3.2.-) (Constitutive photomorphogenesis protein 1) - Pisum sativum (Garden pea)nearly identical (1523)  
loc\_os05g49590 12005.m083816 protein SPA1, putative, expressed seq=cds; coord=6:165393177..165402270:-1;  
parent\_gene=GRMZM2G145556'

'moderately similar to ( 442) AT2G30070 | Symbols: ATKT1, ATKT1P, ATKUP1, KUP1 | ATKT1 (POTASSIUM  
TRANSPORTER 1); potassium ion transmembrane transporter | chr2:12835097-12838466 FORWARDnearly  
identical (1021) HAK17\_ORYSA Probable potassium transporter 17 (OsHAK17) - Oryza sativa (Rice)nearly identical  
(1021) loc\_os09g27580 12009.m22100 protein potassium transporter 17, putative, expressed seq=cds;  
coord=7:123669996..123673712:1; parent\_gene=GRMZM2G088964'

'moderately similar to ( 204) AT3G01850 | Symbols: | ribulose-phosphate 3-epimerase, cytosolic, putative / pentose-5-  
phosphate 3-epimerase, putative | chr3:300428-301987 REVERSEmoderately similar to ( 231) RPE1\_ORYSA  
Ribulose-phosphate 3-epimerase, cytoplasmic isoform (EC 5.1.3.1) (Ribulose-5-phosphate-epimerase) (Cyt-RPEase)  
(RPEcyt) (Pentose-5-phosphate 3-epimerase) (PPE) - Oryza sativa (Rice)moderately similar to ( 231) loc\_os09g32810  
12009.m22157 protein ribulose-phosphate 3-epimerase, putative, expressed seq=cds;  
coord=7:136742676..136746945:1; parent\_gene=GRMZM2G083102'

'very weakly similar to (92.0) AT1G70150 | Symbols: | zinc ion binding | chr1:26416898-26419521  
FORWARDweakly similar to ( 112) loc\_os07g29770 12007.m079679 protein MYND finger family protein, expressed  
seq=cds; coord=7:148589249..148620557:1; parent\_gene=GRMZM2G007190'

'moderately similar to ( 263) AT3G16520 | Symbols: UGT88A1 | UDP-glucuronosyl/UDP-glucosyl transferase family  
protein | chr3:5618847-5620833 REVERSEweakly similar to ( 135) ZOX\_PHAVU Zeatin O-xylosyltransferase (EC  
2.4.2.40) (Zeatin O-beta-D-xylosyltransferase) - Phaseolus vulgaris (Kidney bean) (French bean)highly similar to (  
627) loc\_os07g32020 12007.m07468 protein anthocyanidin 3-O-glucosyltransferase, putative, expressed seq=cds;  
coord=7:151190045..151192101:1; parent\_gene=GRMZM2G155911'

'highly similar to ( 620) AT4G21990 | Symbols: APR3, PRH-26, PRH26, ATAPR3 | APR3 (APS REDUCTASE 3);  
adenyl-sulfate reductase | chr4:11657284-11658973 REVERSEhighly similar to ( 686) loc\_os07g32570  
12007.m07520 protein OsAPRL1 - Oryza sativa adenosine 5'-phosphosulfate reductase-like, expressed seq=cds;  
coord=7:152351854..152354543:-1; parent\_gene=AC189750.4\_FG004'

'weakly similar to ( 137) AT1G23100 | Symbols: | 10 kDa chaperonin, putative | chr1:8195867-8196336  
FORWARDweakly similar to ( 133) CH10\_BRANA 10 kDa chaperonin (Protein CPN10) (Protein groES) - Brassica  
napus (Rape)weakly similar to ( 177) loc\_os07g44740 12007.m08695 protein chaperonin, putative, expressed  
seq=cds; coord=7:169267359..169269362:1; parent\_gene=GRMZM2G013652'

'weakly similar to ( 120) AT5G18560 | Symbols: PUCHI | PUCHI; DNA binding / transcription factor | chr5:6164859-6165905 REVERSEEvery weakly similar to (85.9) ERF4\_TOBAC Ethylene-responsive transcription factor 4 (Ethylene-responsive element-binding factor 4 homolog) (EREBP-3) (NtERF3) - Nicotiana tabacum (Common tobacco)moderately similar to ( 264) loc\_os07g47330 12007.m08950 protein branched silkless1, putative, expressed seq=cds; coord=7:172207717..172209213:-1; parent\_gene=GRMZM2G307119'

'weakly similar to ( 120) AT5G18560 | Symbols: PUCHI | PUCHI; DNA binding / transcription factor | chr5:6164859-6165905 REVERSEEvery weakly similar to (85.9) ERF4\_TOBAC Ethylene-responsive transcription factor 4 (Ethylene-responsive element-binding factor 4 homolog) (EREBP-3) (NtERF3) - Nicotiana tabacum (Common tobacco)moderately similar to ( 264) loc\_os07g47330 12007.m08950 protein branched silkless1, putative, expressed seq=cds; coord=7:172207717..172209213:-1; parent\_gene=GRMZM2G307119'

'moderately similar to ( 312) AT5G05340 | Symbols: | peroxidase, putative | chr5:1579142-1580819 REVERSEmoderately similar to ( 340) PER2\_ORYSA Peroxidase 2 precursor (EC 1.11.1.7) - Oryza sativa (Rice)moderately similar to ( 340) loc\_os07g48030 12007.m09018 protein peroxidase 2 precursor, putative, expressed seq=cds; coord=7:172779032..172780863:1; parent\_gene=GRMZM2G126261'

'moderately similar to ( 253) AT2G30360 | Symbols: CIPK11, PKS5, SIP4, SNRK3.22 | SIP4 (SOS3-INTERACTING PROTEIN 4); kinase/ protein kinase | chr2:12937265-12938572 REVERSEweakly similar to ( 193) CIPK1\_ORYSA CIPK-like protein 1 (EC 2.7.11.1) (OsCK1) - Oryza sativa (Rice)moderately similar to ( 407) loc\_os07g48090 12007.m09024 protein CBL-interacting serine/threonine-protein kinase 11, putative, expressed seq=cds; coord=7:172879486..172881907:1; parent\_gene=GRMZM2G177050'

'moderately similar to ( 282) AT2G22230 | Symbols: | beta-hydroxyacyl-ACP dehydratase, putative | chr2:9450042-9451427 FORWARDmoderately similar to ( 344) loc\_os05g36000 12005.m27841 protein beta-hydroxyacyl-ACP dehydratase, putative, expressed seq=cds; coord=8:101237177..101240478:-1; parent\_gene=GRMZM2G055667'

'moderately similar to ( 246) AT3G07880 | Symbols: | Rho GDP-dissociation inhibitor family protein | chr3:2514175-2515544 FORWARDmoderately similar to ( 345) loc\_os01g68540 12001.m12957 protein rho GDP-dissociation inhibitor 1, putative, expressed seq=cds; coord=8:110142652..110144824:1; parent\_gene=GRMZM2G150724'

'weakly similar to ( 133) AT3G22780 | Symbols: TSO1, ATTSO1 | TSO1 (CHINESE FOR 'UGLY'); transcription factor | chr3:8048927-8052058 FORWARDmoderately similar to ( 500) loc\_os05g43380 12005.m27907 protein CXC domain containing TSO1-like protein 1, putative, expressed seq=cds; coord=8:122238598..122240038:1; parent\_gene=GRMZM2G173198'

'highly similar to ( 526) AT4G13260 | Symbols: YUC2 | YUC2 (YUCCA2); FAD binding / NADP or NADPH binding / flavin-containing monooxygenase/ oxidoreductase | chr4:7721840-7723616 REVERSEhighly similar to ( 720) loc\_os01g53200 12001.m11489 protein disulfide oxidoreductase/ monooxygenase/ oxidoreductase, putative, expressed seq=cds; coord=8:156255731..156258807:1; parent\_gene=GRMZM2G017193'

'weakly similar to ( 181) AT5G40950 | Symbols: RPL27 | RPL27 (RIBOSOMAL PROTEIN LARGE SUBUNIT 27); structural constituent of ribosome | chr5:16410866-16411845 FORWARDmoderately similar to ( 241) RK27\_ORYSA 50S ribosomal protein L27, chloroplast precursor (CL27) - Oryza sativa (Rice)moderately similar to ( 241) loc\_os01g69950 12001.m13044 protein 50S ribosomal protein L27, chloroplast precursor, putative, expressed seq=cds; coord=8:161078252..161080283:-1; parent\_gene=GRMZM2G145496'

'moderately similar to ( 269) AT1G73030 | Symbols: VPS46.2 | VPS46.2 | chr1:27473938-27474848 FORWARDmoderately similar to ( 292) loc\_os06g43590 12006.m091745 protein charged multivesicular body protein 1b, putative, expressed seq=cds; coord=9:94575435..94578265:-1; parent\_gene=GRMZM2G117935'

'weakly similar to ( 174) AT4G27600 | Symbols: | pfkB-type carbohydrate kinase family protein | chr4:13782753-13785005 REVERSEmoderately similar to ( 224) loc\_os10g42240 12010.m21983 protein carbohydrate kinase-like protein, putative, expressed seq=cds; coord=9:112819814..112820314:1; parent\_gene=GRMZM2G144245'

'moderately similar to ( 418) AT4G14480 | Symbols: | protein kinase family protein | chr4:8330081-8331544 REVERSEweakly similar to ( 112) M2K1\_ORYSA Mitogen-activated protein kinase kinase 1 (EC 2.7.12.2) (MAP kinase kinase 1) (MAPKK1) (OsMEK1) - Oryza sativa (Rice)highly similar to ( 635) loc\_os03g47470 12003.m09757 protein ATP binding protein, putative seq=cds; coord=10:1714434..1716242:-1; parent\_gene=GRMZM2G430780'

'moderately similar to ( 397) AT4G10520 | Symbols: | subtilase family protein | chr4:6499794-6502866 FORWARDhighly similar to ( 617) loc\_os04g03100 12004.m05621 protein xylem serine proteinase 1 precursor, putative, expressed seq=cds; coord=10:1891328..1894470:-1; parent\_gene=GRMZM2G012062'

'nearly identical (1233) AT2G41560 | Symbols: ACA4 | ACA4 (AUTO-INHIBITED CA(2

'moderately similar to ( 388) AT3G04080 | Symbols: ATAPY1 | ATAPY1 (APYRASE 1); ATPase/ calmodulin binding / nucleotide diphosphatase | chr3:1068068-1070917 REVERSEmoderately similar to ( 386) APY\_SOLTU Apyrase precursor (EC 3.6.1.5) (ATP-diphosphatase) (Adenosine diphosphatase) (ADPase) (ATP-diphosphohydrolase) - Solanum tuberosum (Potato)highly similar to ( 572) loc\_os12g02980 12012.m26816 protein apyrase precursor, putative, expressed seq=cds; coord=10:2760826..2763337:-1; parent\_gene=GRMZM2G431714'

'highly similar to ( 761) AT1G11680 | Symbols: CYP51G1, EMB1738, CYP51A2, CYP51 | CYP51G1 (CYTOCHROME P450 51G1); oxygen binding / sterol 14-demethylase | chr1:3938925-3940585 FORWARDhighly similar to ( 911) CP51\_SORBI Cytochrome P450 51 (EC 1.14.13.70) (CYPLI) (P450-LIA1) (Obtusifolii 14-alpha demethylase) - Sorghum bicolor (Sorghum) (Sorghum vulgare)highly similar to ( 862) loc\_os11g32240 12011.m07126 protein cytochrome P450 51, putative, expressed seq=cds; coord=10:3062645..3066458:-1; parent\_gene=GRMZM2G068465'

'moderately similar to ( 209) AT3G26085 | Symbols: | CAAX amino terminal protease family protein | chr3:9530842-9532397 FORWARDmoderately similar to ( 247) loc\_os05g22930 12005.m06589 protein CAAX amino terminal protease family protein seq=cds; coord=10:4664889..4667695:-1; parent\_gene=GRMZM2G003750'

'highly similar to ( 764) AT4G34200 | Symbols: EDA9 | EDA9 (embryo sac development arrest 9); ATP binding | chr4:16374041-16376561 REVERSEweakly similar to ( 102) DHGY\_CUCSA Glycerate dehydrogenase (EC 1.1.1.29) (NADH-dependent hydroxypyruvate reductase) (HPR) (GDH) - Cucumis sativus (Cucumber)highly similar to ( 864) loc\_os04g55720 12004.m35214 protein D-3-phosphoglycerate dehydrogenase, chloroplast precursor, putative, expressed seq=cds; coord=10:145794456..145798655:1; parent\_gene=GRMZM2G009323'

'moderately similar to ( 204) AT2G44050 | Symbols: COS1 | COS1 (COI1 SUPPRESSOR1); 6,7-dimethyl-8-ribityllumazine synthase | chr2:18224304-18225917 FORWARDweakly similar to ( 181) RISB\_SPIOL 6,7-dimethyl-8-ribityllumazine synthase, chloroplast precursor (EC 2.5.1.9) (DMRL synthase) (Lumazine synthase) - Spinacia oleracea (Spinach)moderately similar to ( 258) loc\_os04g42000 12004.m09174 protein 6,7-dimethyl-8-ribityllumazine synthase, chloroplast precursor, putative, expressed seq=cds; coord=10:145895430..145900495:1; parent\_gene=GRMZM2G143480'

'moderately similar to ( 338) AT1G52520 | Symbols: FRS6 | FRS6 (FAR1-related sequence 6); zinc ion binding | chr1:19565933-19568248 FORWARDweakly similar to ( 136) NCPR\_CATRO NADPH--cytochrome P450 reductase (EC 1.6.2.4) (CPR) (P450R) - Catharanthus roseus (Rosy periwinkle) (Madagascar periwinkle)nearly identical (1222) loc\_os07g31420 12007.m07411 protein transposon protein, putative, unclassified, expressed seq=cds; coord=10:146108256..146114652:1; parent\_gene=GRMZM2G104268'

'moderately similar to ( 261) AT4G32300 | Symbols: SD2-5 | SD2-5 (S-DOMAIN-2 5); carbohydrate binding / kinase/ protein kinase | chr4:15599970-15602435 FORWARDweakly similar to ( 176) KPRO\_MAIZE Putative receptor protein kinase ZmPK1 precursor (EC 2.7.11.1) - Zea mays (Maize)highly similar to ( 570) loc\_os04g56110 12004.m35493 protein ATP binding protein, putative, expressed seq=cds; coord=10:146170484..146172446:-1; parent\_gene=GRMZM2G007477'

'highly similar to ( 663) AT1G01140 | Symbols: CIPK9, PKS6 | CIPK9 (CBL-INTERACTING PROTEIN KINASE 9); ATP binding / kinase/ protein kinase/ protein serine/threonine kinase | chr1:64398-67512 REVERSEhighly similar to ( 572) CIPK1\_ORYSA CIPK-like protein 1 (EC 2.7.11.1) (OsCK1) - Oryza sativa (Rice)highly similar to ( 792) loc\_os03g03510 12003.m34994 protein CIPK-like protein 1, putative, expressed seq=cds; coord=1:5538101..5542785:-1; parent\_gene=GRMZM2G055575'

'moderately similar to ( 229) AT1G56500 | Symbols: | haloacid dehalogenase-like hydrolase family protein | chr1:21159775-21167092 FORWARDmoderately similar to ( 349) loc\_os03g19760 12003.m35188 protein NHL repeat protein, putative, expressed seq=cds; coord=1:50700350..50712129:1; parent\_gene=AC208571.4\_FG001'

'highly similar to ( 505) AT2G47900 | Symbols: AtTLP3 | AtTLP3 (TUBBY LIKE PROTEIN 3); phosphoric diester hydrolase/ transcription factor | chr2:19611196-19612766 REVERSEhighly similar to ( 622) loc\_os03g22800 12003.m78863 protein tubby protein, putative, expressed seq=cds; coord=1:60093104..60101657:-1; parent\_gene=GRMZM2G378907'

'moderately similar to ( 221) AT1G05260 | Symbols: RCI3, RCI3A | RCI3 (RARE COLD INDUCIBLE GENE 3); peroxidase | chr1:1529827-1531271 FORWARDmoderately similar to ( 218) PER1\_ARAHY Cationic peroxidase 1 precursor (EC 1.11.1.7) (PNPC1) - Arachis hypogaea (Peanut)moderately similar to ( 487) loc\_os03g25330 12003.m07877 protein peroxidase 66 precursor, putative, expressed seq=cds; coord=1:63645310..63646802:1; parent\_gene=GRMZM2G040638'

'moderately similar to ( 463) AT4G25000 | Symbols: ATAMY1, AMY1 | AMY1 (ALPHA-AMYLASE-LIKE); alpha-amylase | chr4:12852109-12853825 REVERSEhighly similar to ( 748) AMY3D\_ORYSA Alpha-amylase isozyme 3D precursor (EC 3.2.1.1) (1,4-alpha-D-glucan glucanohydrolase) - Oryza sativa (Rice)highly similar to ( 748) loc\_os08g36910 12008.m26515 protein alpha-amylase isozyme 3D precursor, putative, expressed seq=cds; coord=1:199630232..199632219:1; parent\_gene=GRMZM2G070172'

'weakly similar to ( 111) AT2G40350 | Symbols: | DNA binding / transcription factor | chr2:16851595-16852068 REVERSEweakly similar to ( 144) loc\_os08g45110 12008.m08481 protein dehydration-responsive element-binding protein 2D, putative, expressed seq=cds; coord=1:201957089..201958672:1; parent\_gene=GRMZM2G028386'

'highly similar to ( 649) AT3G24660 | Symbols: TMKL1 | TMKL1 (transmembrane kinase-like 1); ATP binding / kinase/ protein serine/threonine kinase | chr3:9003641-9005751 FORWARDweakly similar to ( 173) RPK1\_IPONI Receptor-like protein kinase precursor (EC 2.7.11.1) - Ipomoea nil (Japanese morning glory) (Pharbitis nil)highly similar to ( 740) loc\_os08g45060 12008.m08476 protein protein Kinase-like protein TMKL1 precursor, putative, expressed seq=cds; coord=1:202158131..202160689:-1; parent\_gene=GRMZM2G422373'

'moderately similar to ( 230) AT5G04410 | Symbols: NAC2, anac078 | NAC2; transcription factor | chr5:1243980-1246416 FORWARDweakly similar to ( 159) NAC74\_ORYSA NAC domain-containing protein 74 (ONAC074) - Oryza sativa (Rice)highly similar to ( 845) loc\_os08g44820 12008.m080239 protein no apical meristem protein, expressed seq=cds; coord=1:203087262..203092166:1; parent\_gene=GRMZM2G340305'

'moderately similar to ( 485) AT5G21482 | Symbols: CKX7, ATCKX5 | CKX7 (CYTOKININ OXIDASE 7); cytokinin dehydrogenase/ oxidoreductase | chr5:7226842-7230052 FORWARDmoderately similar to ( 321) CKX1\_MAIZE Cytokinin dehydrogenase 1 precursor (EC 1.5.99.12) (Cytokinin oxidase 1) (CKO 1) (COX 1) (ZmCKX1) - Zea mays (Maize)highly similar to ( 706) loc\_os08g35860 12008.m07575 protein cytokinin dehydrogenase 7, putative, expressed seq=cds; coord=1:207708925..207713476:1; parent\_gene=GRMZM2G348452'

'weakly similar to ( 101) AT5G20630 | Symbols: GLP3, GLP3A, GLP3B, ATGER3, GER3 | GER3 (GERMIN 3); oxalate oxidase | chr5:6975315-6975950 REVERSEweakly similar to ( 103) GLP1\_SINAL Germin-like protein 1 precursor - Sinapis alba (White mustard) (Brassica hirta)weakly similar to ( 114) loc\_os08g35750 12008.m07564 protein germin-like protein 1 precursor, putative, expressed seq=cds; coord=1:207865153..207865778:-1; parent\_gene=GRMZM2G363004'

'weakly similar to ( 160) AT1G72610 | Symbols: GLP1, ATGER1, GER1 | GER1 (GERMIN-LIKE PROTEIN 1); oxalate oxidase | chr1:27339302-27339928 REVERSEweakly similar to ( 161) AB19B\_PRUPE Auxin-binding protein ABP19b precursor - Prunus persica (Peach)moderately similar to ( 207) loc\_os08g35750 12008.m07564 protein germin-like protein 1 precursor, putative, expressed seq=cds; coord=1:207891946..207892644:1; parent\_gene=AC195794.3\_FG002'

'moderately similar to ( 429) AT1G11190 | Symbols: BFN1, ENDO1 | BFN1 (BIFUNCTIONAL NUCLEASE I); T/G mismatch-specific endonuclease/ endoribonuclease, producing 5'-phosphomonoesters / nucleic acid binding / single-stranded DNA specific endodeoxyribonuclease | chr1:3750338-3752696 REVERSEmoderately similar to ( 389) loc\_os04g54390 12004.m10330 protein nuclease PA3, putative, expressed seq=cds; coord=1:224916793..224919064:-1; parent\_gene=GRMZM2G168744'

'highly similar to ( 645) AT4G28600 | Symbols: NPGR2 | NPGR2 (no pollen germination related 2); calmodulin binding | chr4:14130046-14132599 FORWARDnearly identical (1135) loc\_os10g33290 12010.m50421 protein NPGR2, putative, expressed seq=cds; coord=1:232995038..233002321:1; parent\_gene=GRMZM2G117763'

'moderately similar to ( 469) AT5G60710 | Symbols: | zinc finger (C3HC4-type RING finger) family protein | chr5:24410953-24414849 REVERSEhighly similar to ( 660) loc\_os10g32740 12010.m06110 protein protein binding protein, putative, expressed seq=cds; coord=1:233577053..233579470:-1; parent\_gene=GRMZM2G343972'

'weakly similar to ( 143) AT4G18770 | Symbols: MYB98, AtMYB98 | MYB98 (myb domain protein 98); DNA binding / transcription factor | chr4:10311068-10312557 FORWARDweakly similar to ( 114) GAM1\_ORYSA Transcription factor GAMYB (OsGAMyb) - Oryza sativa (Rice)moderately similar to ( 208) loc\_os01g63680 12001.m12483 protein myb-like DNA-binding domain containing protein, expressed seq=cds; coord=1:252320123..252322173:1; parent\_gene=GRMZM2G121570'

'highly similar to ( 568) AT4G33950 | Symbols: OST1, SNRK2-6, SRK2E, SNRK2.6, P44 | OST1 (OPEN STOMATA 1); calcium-dependent protein serine/threonine kinase/ kinase/ protein kinase | chr4:16272819-16274657 FORWARDhighly similar to ( 646) SAPKA\_ORYSA Serine/threonine-protein kinase SAPK10 (EC 2.7.11.1) (Osmotic stress/abscisic acid-activated protein kinase 10) - Oryza sativa (Rice)highly similar to ( 646) loc\_os03g41460 12003.m09212 protein serine/threonine-protein kinase SAPK10, putative, expressed seq=cds; coord=1:255084395..255087718:1; parent\_gene=GRMZM2G081915'

'highly similar to ( 568) AT4G33950 | Symbols: OST1, SNRK2-6, SRK2E, SNRK2.6, P44 | OST1 (OPEN STOMATA 1); calcium-dependent protein serine/threonine kinase/ kinase/ protein kinase | chr4:16272819-16274657 FORWARDhighly similar to ( 646) SAPKA\_ORYSA Serine/threonine-protein kinase SAPK10 (EC 2.7.11.1) (Osmotic stress/abscisic acid-activated protein kinase 10) - Oryza sativa (Rice)highly similar to ( 646) loc\_os03g41460 12003.m09212 protein serine/threonine-protein kinase SAPK10, putative, expressed seq=cds; coord=1:255084395..255087718:1; parent\_gene=GRMZM2G081915'

'weakly similar to ( 143) AT5G26751 | Symbols: ATSK11, SK 11 | ATSK11; protein kinase/ protein serine/threonine kinase | chr5:9399582-9401839 REVERSEweakly similar to ( 152) MSK1\_TOBAC Shaggy-related protein kinase NtK-1 (EC 2.7.11.1) - Nicotiana tabacum (Common tobacco)weakly similar to ( 177) loc\_os01g14860 12001.m43459 protein glycogen synthase kinase-3 homolog MsK-3, putative, expressed seq=cds; coord=1:257033199..257043603:1; parent\_gene=GRMZM2G357081'

'weakly similar to ( 180) AT4G37740 | Symbols: AtGRF2 | AtGRF2 (GROWTHREGULATING FACTOR 2); transcription activator | chr4:17725533-17727609 REVERSEhighly similar to ( 517) loc\_os03g47140 12003.m09727 protein atGRF2, putative, expressed seq=cds; coord=1:257186167..257188884:-1; parent\_gene=GRMZM2G018414'

'weakly similar to ( 180) AT4G37740 | Symbols: AtGRF2 | AtGRF2 (GROWTHREGULATING FACTOR 2); transcription activator | chr4:17725533-17727609 REVERSEhighly similar to ( 517) loc\_os03g47140 12003.m09727 protein atGRF2, putative, expressed seq=cds; coord=1:257186167..257188884:-1; parent\_gene=GRMZM2G018414'

'moderately similar to ( 331) AT1G31260 | Symbols: ZIP10 | ZIP10 (ZINC TRANSPORTER 10 PRECURSOR); cation transmembrane transporter/ metal ion transmembrane transporter | chr1:11175559-11177362 REVERSEmoderately similar to ( 456) loc\_os03g46470 12003.m09667 protein zinc transporter 10 precursor, putative, expressed seq=cds; coord=1:258353073..258355277:1; parent\_gene=GRMZM2G118821'

'nearly identical (1030) AT1G61010 | Symbols: CPSF73-I | CPSF73-I (CLEAVAGE AND POLYADENYLATION SPECIFICITY FACTOR 73-I); protein binding | chr1:22474954-22477660 REVERSEweakly similar to ( 128) CPSF2\_ORYSA Cleavage and polyadenylation specificity factor 100 kDa subunit (CPSF 100 kDa subunit) - Oryza sativa (Rice)nearly identical (1190) loc\_os03g63590 12003.m11227 protein cleavage and polyadenylation specificity factor, 73 kDa subunit, putative, expressed seq=cds; coord=1:298965855..298969862:-1; parent\_gene=GRMZM2G422649'

'moderately similar to ( 388) AT1G15820 | Symbols: LHCB6, CP24 | LHCB6 (LIGHT HARVESTING COMPLEX PSII SUBUNIT 6); chlorophyll binding | chr1:5446685-5447676 REVERSEmoderately similar to ( 388) CB4\_SPIOL Chlorophyll a-b binding protein CP24, chloroplast precursor - Spinacia oleracea (Spinach)moderately similar to ( 405) loc\_os04g38410 12004.m08831 protein chlorophyll a-b binding protein CP24, chloroplast precursor, putative, expressed seq=cds; coord=2:2018212..2019764:-1; parent\_gene=GRMZM2G039996'

'weakly similar to ( 135) AT3G48100 | Symbols: ARR5, ATRR2, IBC6 | ARR5 (ARABIDOPSIS RESPONSE REGULATOR 5); transcription regulator/ two-component response regulator | chr3:17759112-17760740 REVERSEweakly similar to ( 189) loc\_os04g57720 12004.m10657 protein OsRR6 - Rice type-A response regulator, expressed seq=cds; coord=2:2081848..2082630:-1; parent\_gene=GRMZM2G040736'

'moderately similar to ( 241) AT5G04490 | Symbols: VTE5 | VTE5 (vitamin E pathway gene5); phosphatidate cytidyltransferase/ phytol kinase | chr5:1279867-1281587 FORWARDmoderately similar to ( 370) PHYK\_MAIZE Probable phytol kinase, chloroplast precursor (EC 2.7.-.-) - Zea mays (Maize)weakly similar to ( 174) loc\_os01g61560 12001.m43251 protein phytol kinase 2, chloroplast precursor, putative, expressed seq=cds; coord=2:2495821..2497668:-1; parent\_gene=GRMZM2G104538'

'moderately similar to ( 424) AT1G16670 | Symbols: | protein kinase family protein | chr1:5697846-5699492 FORWARDmoderately similar to ( 205) NORK\_MEDTR Nodulation receptor kinase precursor (EC 2.7.11.1) (Does not make infections protein 2) (Symbiosis receptor-like kinase) (MtSYMRK) - Medicago truncatula (Barrel medic)highly similar to ( 542) loc\_os04g52840 12004.m35461 protein serine/threonine-protein kinase receptor precursor, putative, expressed seq=cds; coord=2:9355771..9359630:1; parent\_gene=GRMZM2G165060'

'very weakly similar to (97.4) AT1G62290 | Symbols: | aspartyl protease family protein | chr1:23010107-23012681 REVERSEweakly similar to ( 139) ASPRX\_ORYSA Aspartic proteinase precursor (EC 3.4.23.-) - Oryza sativa (Rice)weakly similar to ( 139) loc\_os05g04630 12005.m27692 protein retrotransposon protein, putative, SINE subclass, expressed seq=cds; coord=2:30497529..30524217:1; parent\_gene=GRMZM2G333408'

'highly similar to ( 600) AT5G03860 | Symbols: MLS | MLS (MALATE SYNTHASE); malate synthase | chr5:1032276  
1034527 REVERSEhighly similar to ( 762) MASY\_MAIZE Malate synthase, glyoxysomal (EC 2.3.3.9) - Zea mays  
(Maize)highly similar to ( 689) loc\_os04g40990 12004.m09079 protein malate synthase, glyoxysomal, putative,  
expressed seq=cds; coord=2:36317292..36319768:1; parent\_gene=GRMZM2G102183'

'weakly similar to ( 129) AT5G14360 | Symbols: | ubiquitin family protein | chr5:4631038-4631641  
FORWARDweakly similar to ( 167) loc\_os02g38410 12002.m08929 protein BCL-2 binding anthanogene-1, putative,  
expressed seq=cds; coord=2:36824114..36825732:-1; parent\_gene=GRMZM2G045117'

'moderately similar to ( 382) AT1G19150 | Symbols: LHCA6, LHCA2\*1 | LHCA6; chlorophyll binding | chr1:6612806  
6613799 FORWARDmoderately similar to ( 311) CB12\_PETHY Chlorophyll a-b binding protein, chloroplast  
precursor (LHCI type II CAB) - Petunia hybrida (Petunia)moderately similar to ( 448) loc\_os09g26810 12009.m05833  
protein chlorophyll a-b binding protein, chloroplast precursor, putative, expressed seq=cds;  
coord=2:184011820..184014232:1; parent\_gene=GRMZM2G117412'

'highly similar to ( 527) AT5G66960 | Symbols: | prolyl oligopeptidase family protein | chr5:26736209-26739493  
REVERSEweakly similar to ( 108) loc\_os09g29950 12009.m22244 protein protease 2, putative, expressed seq=cds;  
coord=2:185292654..185305292:1; parent\_gene=GRMZM2G065665'

'moderately similar to ( 488) AT2G26560 | Symbols: PLP2, PLA IIA, PLA2A | PLA2A (PHOSPHOLIPASE A 2A);  
lipase/ nutrient reservoir | chr2:11293912-11295708 REVERSEmoderately similar to ( 306) PAT3\_SOLTU Patatin  
class 1 precursor (Patatin class I) (Potato tuber protein) - Solanum tuberosum (Potato)highly similar to ( 629)  
loc\_os09g28770 12009.m06028 protein patatin class 1 precursor, putative, expressed seq=cds;  
coord=2:186851126..186853333:1; parent\_gene=GRMZM2G123764'

'weakly similar to ( 139) loc\_os12g32986 12012.m27011 protein heat shock protein 83, putative, expressed seq=cds;  
coord=2:189610974..189617149:1; parent\_gene=GRMZM2G474367'

'moderately similar to ( 250) AT3G63170 | Symbols: | chalcone isomerase | chr3:23334675-23335993  
FORWARDmoderately similar to ( 341) loc\_os07g38390 12007.m08085 protein chalcone isomerase, putative,  
expressed seq=cds; coord=2:206127228..206130402:-1; parent\_gene=GRMZM2G060011'

'moderately similar to ( 214) AT3G46730 | Symbols: | disease resistance protein (CC-NBS class), putative |  
chr3:17213069-17215612 REVERSEhighly similar to ( 946) loc\_os11g13430 12011.m05485 protein RGH1A,  
putative seq=cds; coord=2:214204840..214207788:1; parent\_gene=GRMZM2G379770'

'weakly similar to ( 137) AT1G03470 | Symbols: | kinase interacting family protein | chr1:866217-867493  
REVERSEmoderately similar to ( 230) loc\_os07g47090 12007.m079779 protein expressed protein seq=cds;  
coord=2:215519711..215522075:-1; parent\_gene=GRMZM2G131554'

'moderately similar to ( 421) loc\_os01g09020 12001.m07527 protein expressed protein seq=cds;  
coord=3:8271085..8273954:-1; parent\_gene=GRMZM2G576002'

'moderately similar to ( 488) AT2G34930 | Symbols: | disease resistance family protein | chr2:14737169-14739886  
REVERSEmoderately similar to ( 229) RPK1\_IPONI Receptor-like protein kinase precursor (EC 2.7.11.1) - Ipomoea  
nil (Japanese morning glory) (Pharbitis nil)highly similar to ( 791) loc\_os11g35450 12011.m07397 protein leucine-  
rich repeat receptor protein kinase EXS precursor, putative, expressed seq=cds; coord=3:8881267..8884385:1;  
parent\_gene=GRMZM2G083797'



'moderately similar to ( 335) AT1G71710 | Symbols: | inositol polyphosphate 5-phosphatase, putative | chr1:26973796-26976774 REVERSEhighly similar to ( 567) loc\_os01g08780 12001.m07503 protein type I inositol-1,4,5-trisphosphate 5-phosphatase CVP2, putative, expressed seq=cds; coord=3:9112149..9120357:1; parent\_gene=GRMZM2G355381'

'weakly similar to ( 136) AT5G50380 | Symbols: ATEXO70F1 | ATEXO70F1 (exocyst subunit EXO70 family protein F1); protein binding | chr5:20516382-20518433 REVERSEmoderately similar to ( 211) loc\_os07g10910 12007.m079635 protein protein binding protein, putative, expressed seq=cds; coord=3:159726669..159743904:1; parent\_gene=GRMZM2G436742'

'weakly similar to ( 134) AT3G27850 | Symbols: RPL12-C | RPL12-C (ribosomal protein L12-c); structural constituent of ribosome | chr3:10324905-10325468 FORWARDweakly similar to ( 199) RK12\_ORYSA 50S ribosomal protein L12, chloroplast precursor (CL12) - Oryza sativa (Rice)weakly similar to ( 199) loc\_os01g47330 12001.m10928 protein 50S ribosomal protein L12-1, chloroplast precursor, putative, expressed seq=cds; coord=3:211727508..211728617:-1; parent\_gene=GRMZM2G360021'

'highly similar to ( 868) AT3G58610 | Symbols: | ketol-acid reductoisomerase | chr3:21671561-21674639 FORWARDhighly similar to ( 858) ILV5\_PEA Ketol-acid reductoisomerase, chloroplast precursor (EC 1.1.1.86) (Acetohydroxy-acid reductoisomerase) (Alpha-keto-beta-hydroxylacil reductoisomerase) - Pisum sativum (Garden pea)highly similar to ( 920) loc\_os01g46380 12001.m10836 protein ketol-acid reductoisomerase, chloroplast precursor, putative, expressed seq=cds; coord=3:213623450..213627174:-1; parent\_gene=GRMZM2G004382'

'weakly similar to ( 163) AT5G55340 | Symbols: | long-chain-alcohol O-fatty-acyltransferase family protein / wax synthase family protein | chr5:22439985-22440986 REVERSEmoderately similar to ( 475) loc\_os01g46270 12001.m10825 protein wax synthase isoform 3, putative, expressed seq=cds; coord=3:213797343..213799289:-1; parent\_gene=GRMZM2G349407'

'weakly similar to ( 163) AT5G55340 | Symbols: | long-chain-alcohol O-fatty-acyltransferase family protein / wax synthase family protein | chr5:22439985-22440986 REVERSEmoderately similar to ( 475) loc\_os01g46270 12001.m10825 protein wax synthase isoform 3, putative, expressed seq=cds; coord=3:213797343..213799289:-1; parent\_gene=GRMZM2G349407'

'weakly similar to ( 163) AT5G55340 | Symbols: | long-chain-alcohol O-fatty-acyltransferase family protein / wax synthase family protein | chr5:22439985-22440986 REVERSEmoderately similar to ( 475) loc\_os01g46270 12001.m10825 protein wax synthase isoform 3, putative, expressed seq=cds; coord=3:213797343..213799289:-1; parent\_gene=GRMZM2G349407'

'highly similar to ( 538) AT4G16745 | Symbols: | exostosin family protein | chr4:9412185-9414053 FORWARDhighly similar to ( 709) loc\_os01g45350 12001.m10738 protein limonene cyclase like protein, putative, expressed seq=cds; coord=3:215380332..215382314:-1; parent\_gene=GRMZM2G048010'

'weakly similar to ( 111) AT1G14440 | Symbols: AtHB31 | AtHB31 (ARABIDOPSIS THALIANA HOMEBOX PROTEIN 31); DNA binding / transcription factor | chr1:4939076-4940014 REVERSEmoderately similar to ( 252) loc\_os11g13930 12011.m05532 protein zinc finger homeodomain protein 1, putative, expressed seq=cds; coord=4:11264094..11266923:-1; parent\_gene=GRMZM2G068330'

'weakly similar to ( 164) AT4G35160 | Symbols: | O-methyltransferase family 2 protein | chr4:16730989-16732808 REVERSEhighly similar to ( 647) ZRP4\_MAIZE O-methyltransferase ZRP4 (EC 2.1.1.-) (OMT) - Zea mays (Maize)moderately similar to ( 410) loc\_os05g43930 12005.m08519 protein O-methyltransferase ZRP4, putative, expressed seq=cds; coord=4:11916303..11917798:-1; parent\_gene=GRMZM2G017557'

'moderately similar to ( 347) AT2G24765 | Symbols: ARF3, ARL1, ATARL1 | ARF3 (ADP-RIBOSYLATION FACTOR 3); protein binding | chr2:10562822-10564742 FORWARDmoderately similar to ( 237) ARF1\_ORYSA ADP-ribosylation factor 1 (13 kDa cold-induced protein) - Oryza sativa (Rice)moderately similar to ( 358) loc\_os08g15040 12008.m05627 protein ADP-ribosylation factor 3, putative, expressed seq=cds; coord=4:25788335..25797883:-1; parent\_gene=GRMZM2G147726'

'moderately similar to ( 347) AT2G24765 | Symbols: ARF3, ARL1, ATARL1 | ARF3 (ADP-RIBOSYLATION FACTOR 3); protein binding | chr2:10562822-10564742 FORWARDmoderately similar to ( 237) ARF1\_ORYSA ADP-ribosylation factor 1 (13 kDa cold-induced protein) - Oryza sativa (Rice)moderately similar to ( 358) loc\_os08g15040 12008.m05627 protein ADP-ribosylation factor 3, putative, expressed seq=cds; coord=4:25788335..25797883:-1; parent\_gene=GRMZM2G147726'

'moderately similar to ( 254) AT3G02450 | Symbols: | cell division protein ftsH, putative | chr3:502876-505030 REVERSEweakly similar to ( 190) FTSH\_TOBAC Cell division protease ftsH homolog, chloroplast precursor (EC 3.4.24.-) (DS9) - Nicotiana tabacum (Common tobacco)moderately similar to ( 281) loc\_os04g39190 12004.m08908 protein cell division protein ftsH homolog 4, putative, expressed seq=cds; coord=4:28322183..28324409:1; parent\_gene=GRMZM2G125151'

'highly similar to ( 954) AT4G04890 | Symbols: PDF2 | PDF2 (PROTODERMAL FACTOR 2); DNA binding / transcription factor | chr4:2476970-2480090 REVERSEearly identical (1140) loc\_os08g08820 12008.m080098 protein homeobox protein GLABRA2, putative, expressed seq=cds; coord=4:28979897..28986080:-1; parent\_gene=GRMZM2G130442'

'nearly identical (1254) AT5G07350 | Symbols: | tudor domain-containing protein / nuclease family protein | chr5:2319790-2324892 REVERSEearly identical (1683) loc\_os02g32350 12002.m33392 protein 4SNc-Tudor domain protein, putative, expressed seq=cds; coord=4:94432879..94438375:1; parent\_gene=AC207890.3\_FG002'

'weakly similar to ( 142) AT5G04840 | Symbols: | bZIP protein | chr5:1406005-1407648 FORWARDmoderately similar to ( 413) loc\_os02g33560 12002.m08449 protein expressed protein seq=cds; coord=4:110523604..110529675:-1; parent\_gene=GRMZM2G118870'

'moderately similar to ( 432) AT3G14090 | Symbols: ATEXO70D3 | ATEXO70D3 (exocyst subunit EXO70 family protein D3); protein binding | chr3:4669508-4671379 REVERSEmoderately similar to ( 444) HMDH\_MAIZE 3-hydroxy-3-methylglutaryl-coenzyme A reductase (EC 1.1.1.34) (HMG-CoA reductase) - Zea mays (Maize)highly similar to ( 715) loc\_os08g35470 12008.m07536 protein protein binding protein, putative, expressed seq=cds; coord=4:131371572..131383071:1; parent\_gene=GRMZM2G390691'

'weakly similar to ( 157) AT1G76880 | Symbols: | trihelix DNA-binding protein, putative | chr1:28865594-28867931 FORWARDmoderately similar to ( 390) loc\_os02g43300 12002.m09365 protein expressed protein seq=cds; coord=4:149896374..149900088:1; parent\_gene=GRMZM2G063203'

'weakly similar to ( 181) AT3G20280 | Symbols: | PHD finger family protein | chr3:7072892-7074340 FORWARDhighly similar to ( 540) loc\_os02g48810 12002.m09915 protein PHD-finger family protein, expressed seq=cds; coord=4:163892981..163897431:1; parent\_gene=GRMZM2G411032'

'moderately similar to ( 329) AT5G10770 | Symbols: | chloroplast nucleoid DNA-binding protein, putative | chr5:3403331-3405331 REVERSEhighly similar to ( 549) loc\_os02g48860 12002.m09920 protein aspartic proteinase nepenthesin-2 precursor, putative, expressed seq=cds; coord=4:163962237..163964018:1; parent\_gene=GRMZM2G141036'

'weakly similar to ( 130) AT2G03200 | Symbols: | aspartyl protease family protein | chr2:966506-967891 REVERSEweakly similar to ( 150) loc\_os08g36530 12008.m07642 protein aspartic proteinase nepenthesin-2 precursor, putative seq=cds; coord=4:166481073..166482727:1; parent\_gene=GRMZM2G444623'

'very weakly similar to (93.2) AT1G75580 | Symbols: | auxin-responsive protein, putative | chr1:28377530-28377856 FORWARDweakly similar to ( 129) loc\_os06g04590 12006.m05189 protein OsSAUR24 - Auxin-responsive SAUR gene family member, expressed seq=cds; coord=4:167073486..167074934:-1; parent\_gene=GRMZM2G015049'

'very weakly similar to (85.9) AT2G19690 | Symbols: PLA2-BETA | PLA2-BETA (PHOSPHOLIPASE A2-BETA); calcium ion binding / phospholipase A2 | chr2:8503326-8504549 FORWARDweakly similar to ( 106) loc\_os02g58500 12002.m33321 protein phospholipase A2, putative, expressed seq=cds; coord=4:168739234..168740533:1; parent\_gene=GRMZM2G045294'

'weakly similar to ( 167) loc\_os02g57360 12002.m10758 protein metal ion binding protein, putative, expressed seq=cds; coord=4:171214402..171215201:-1; parent\_gene=GRMZM2G120964'

'very weakly similar to (98.6) AT1G21910 | Symbols: | AP2 domain-containing transcription factor family protein | chr1:7696655-7697347 FORWARDweakly similar to ( 167) loc\_os06g10780 12006.m05795 protein DNA binding protein, putative, expressed seq=cds; coord=4:178386285..178387653:1; parent\_gene=GRMZM2G011110'

'weakly similar to ( 188) AT1G22400 | Symbols: UGT85A1, ATUGT85A1 | UGT85A1; UDP-glycosyltransferase/ cis-zeatin O-beta-D-glucosyltransferase/ glucuronosyltransferase/ trans-zeatin O-beta-D-glucosyltransferase/ transferase, transferring glycosyl groups / transferase, transferring hexosyl groups | chr1:7903851-7906607 REVERSEmoderately similar to ( 254) loc\_os02g51900 12002.m10221 protein cytokinin-O-glucosyltransferase 2, putative, expressed seq=cds; coord=4:180437024..180437864:1; parent\_gene=GRMZM2G383920'

'moderately similar to ( 420) AT1G79230 | Symbols: ST1, ATMST1, MST1, ATRDH1 | MST1 (MERCAPTOPYRUVATE SULFURTRANSFERASE 1); 3-mercaptopyruvate sulfurtransferase/ sulfurtransferase/ thiosulfate sulfurtransferase | chr1:29801358-29803679 FORWARDhighly similar to ( 516) loc\_os02g07044 12002.m100460 protein thiosulfate transferase, putative, expressed seq=cds; coord=4:236383011..236388871:-1; parent\_gene=GRMZM2G168888'

'weakly similar to ( 107) AT3G20570 | Symbols: | plastocyanin-like domain-containing protein | chr3:7186754-7187453 REVERSEweakly similar to ( 178) loc\_os02g06690 12002.m06017 protein blue copper protein precursor, putative, expressed seq=cds; coord=4:236727165..236728151:-1; parent\_gene=GRMZM2G101872'

'nearly identical (1162) AT5G46210 | Symbols: CUL4, ATCUL4 | CUL4 (CULLIN4); protein binding / ubiquitin-protein ligase | chr5:18731569-18736653 REVERSEnearly identical (1415) loc\_os03g57290 12003.m10647 protein cullin-4B, putative, expressed seq=cds; coord=5:4777029..4786789:-1; parent\_gene=AC155496.2\_FG009'

'weakly similar to ( 107) AT1G30210 | Symbols: TCP24 | TCP24 (TEOSINTE BRANCHED1, CYCLOIDEA, AND PCF FAMILY 24); transcription factor | chr1:10628754-10629728 REVERSEmoderately similar to ( 248) loc\_os03g57190 12003.m10638 protein TCP family transcription factor containing protein, expressed seq=cds; coord=5:4945066..4946626:-1; parent\_gene=GRMZM2G089361'

'moderately similar to ( 375) AT3G22750 | Symbols: | protein kinase, putative | chr3:8037364-8039096 REVERSEhighly similar to ( 538) loc\_os03g53410 12003.m10311 protein ATMRK1, putative, expressed seq=cds; coord=5:7587329..7589198:-1; parent\_gene=GRMZM2G014618'

'moderately similar to ( 418) AT1G67480 | Symbols: | kelch repeat-containing F-box family protein | chr1:25277294-25278529 FORWARDhighly similar to ( 625) loc\_os02g30210 12002.m100041 protein SKIP4, putative, expressed seq=cds; coord=5:163229123..163232017:-1; parent\_gene=GRMZM2G011627'

'weakly similar to ( 137) AT3G52090 | Symbols: ATRPB13.6, NRPB11, NRPD11, NRPE11 | NRPB11; DNA binding / DNA-directed RNA polymerase | chr3:19318069-19318998 REVERSEweakly similar to ( 146) loc\_os07g07610 12007.m05220 protein DNA-directed RNA polymerase II subunit J, putative, expressed seq=cds; coord=5:184738650..184741012:1; parent\_gene=GRMZM2G043461'

'highly similar to ( 579) AT5G60710 | Symbols: | zinc finger (C3HC4-type RING finger) family protein | chr5:24410953-24414849 REVERSEnearly identical (1010) loc\_os02g40664 12002.m09152 protein protein binding protein, putative, expressed seq=cds; coord=5:185572733..185577146:-1; parent\_gene=GRMZM2G094602'

'moderately similar to ( 257) AT3G24800 | Symbols: PRT1 | PRT1 (PROTEOLYSIS 1); ubiquitin-protein ligase | chr3:9055653-9057795 FORWARDmoderately similar to ( 441) loc\_os02g40810 12002.m09166 protein ubiquitin protein ligase PRT1, putative, expressed seq=cds; coord=5:185769439..185782378:-1; parent\_gene=GRMZM2G362883'

'moderately similar to ( 257) AT3G24800 | Symbols: PRT1 | PRT1 (PROTEOLYSIS 1); ubiquitin-protein ligase | chr3:9055653-9057795 FORWARDmoderately similar to ( 441) loc\_os02g40810 12002.m09166 protein ubiquitin protein ligase PRT1, putative, expressed seq=cds; coord=5:185769439..185782378:-1; parent\_gene=GRMZM2G362883'

'moderately similar to ( 232) AT3G23250 | Symbols: MYB15, ATY19, ATMYB15 | MYB15 (MYB DOMAIN PROTEIN 15); DNA binding / transcription factor | chr3:8309742-8310624 FORWARDmoderately similar to ( 285) MYB4\_ORYSA Myb-related protein Myb4 (OsMyb4) (Transcription factor RLTR1) - Oryza sativa (Rice)moderately similar to ( 322) loc\_os02g41510 12002.m09187 protein myb-related protein Myb4, putative, expressed seq=cds; coord=5:186413823..186415077:-1; parent\_gene=GRMZM2G095904'

'highly similar to ( 582) AT5G03300 | Symbols: ADK2 | ADK2 (ADENOSINE KINASE 2); adenosine kinase/ copper ion binding / kinase | chr5:796573-798997 FORWARDmoderately similar to ( 479) ADK\_PHYPA Adenosine kinase (EC 2.7.1.20) (AK) (Adenosine 5'-phosphotransferase) - Physcomitrella patens (Moss)highly similar to ( 654) loc\_os02g41590 12002.m09195 protein adenosine kinase 2, putative, expressed seq=cds; coord=5:186517098..186522957:-1; parent\_gene=GRMZM2G540538'

'weakly similar to ( 124) loc\_os02g43550 12002.m09390 protein nuc-1 negative regulatory protein preg, putative, expressed seq=cds; coord=5:195401851..195402389:1; parent\_gene=GRMZM2G160563'

'weakly similar to ( 147) AT5G07450 | Symbols: CYCP4;3 | CYCP4;3 (cyclin p4;3); cyclin-dependent protein kinase | chr5:2358418-2359253 REVERSEmoderately similar to ( 227) loc\_os02g43550 12002.m09390 protein nuc-1 negative regulatory protein preg, putative, expressed seq=cds; coord=5:195401851..195404340:1; parent\_gene=GRMZM2G160563'

'weakly similar to ( 129) AT4G17500 | Symbols: ATERF-1 | ATERF-1 (ETHYLENE RESPONSIVE ELEMENT BINDING FACTOR 1); DNA binding / transcription activator/ transcription factor | chr4:9759405-9760211 FORWARDweakly similar to ( 131) ERF2\_NICSY Ethylene-responsive transcription factor 2 (Ethylene-responsive element-binding factor 2) (EREBP-2) (Nserf2) - Nicotiana sylvestris (Wood tobacco)moderately similar to ( 241) loc\_os02g43790 12002.m09413 protein ethylene responsive protein, putative, expressed seq=cds; coord=5:191217942..191219471:-1; parent\_gene=GRMZM2G466044'

'very weakly similar to (97.1) AT1G35250 | Symbols: | thioesterase family protein | chr1:12933046-12934465 REVERSEweakly similar to ( 166) loc\_os02g44200 12002.m09462 protein pollen thioesterase, putative seq=cds; coord=5:192252759..192253857:-1; parent\_gene=GRMZM2G004752'

'moderately similar to ( 248) AT5G40250 | Symbols: | zinc finger (C3HC4-type RING finger) family protein | chr5:16086056-16087186 FORWARDmoderately similar to ( 472) loc\_os02g50930 12002.m10127 protein RING-H2 finger protein ATL5I, putative, expressed seq=cds; coord=5:206555179..206557068:1; parent\_gene=GRMZM2G053303'

'highly similar to ( 790) AT1G73590 | Symbols: PIN1, ATPIN1 | PIN1 (PIN-FORMED 1); transporter | chr1:27659772-27662876 FORWARDnearly identical (1019) PIN1\_ORYSA Auxin efflux carrier component 1 (OsPIN1) (Ethylene insensitive root 1 homolog) - Oryza sativa (Rice)nearly identical (1019) loc\_os02g50960 12002.m33866 protein auxin efflux carrier component 1, putative, expressed seq=cds; coord=5:206727149..206730565:1; parent\_gene=GRMZM2G074267'

'very weakly similar to (82.8) AMPD\_ORYSA Probable AMP deaminase (EC 3.5.4.6) - Oryza sativa (Rice)very weakly similar to (82.8) loc\_os07g49270 12007.m09136 protein AMP deaminase, putative, expressed seq=cds; coord=5:207021151..207021641:-1; parent\_gene=GRMZM2G114362'

'weakly similar to ( 132) AT1G78080 | Symbols: RAP2.4 | RAP2.4 (related to AP2 4); DNA binding / transcription factor | chr1:29364790-29365794 FORWARDmoderately similar to ( 202) loc\_os02g51670 12002.m10198 protein AP2 domain-containing protein, putative, expressed seq=cds; coord=5:208162767..208165707:1; parent\_gene=GRMZM2G055204'

'very weakly similar to (84.0) AT2G30140 | Symbols: | UDP-glucuronosyl/UDP-glucosyl transferase family protein | chr2:12872200-12873691 FORWARDweakly similar to ( 135) loc\_os10g12120 12010.m04526 protein UDP-glycosyltransferase/ transferase, transferring glycosyl groups, putative seq=cds; coord=5:208178465..208179815:1; parent\_gene=GRMZM2G055124'

'moderately similar to ( 385) AT5G65020 | Symbols: ANNAT2 | ANNAT2 (Annexin Arabidopsis 2); calcium ion binding / calcium-dependent phospholipid binding | chr5:25974366-25975554 FORWARDmoderately similar to ( 343) ANX4\_FRAAN Annexin-like protein RJ4 - Fragaria ananassa (Strawberry)highly similar to ( 566) loc\_os02g51750 12002.m10206 protein annexin-like protein RJ4, putative, expressed seq=cds; coord=5:208194750..208197747:1; parent\_gene=GRMZM2G061950'

'moderately similar to ( 201) AT4G25780 | Symbols: | pathogenesis-related protein, putative | chr4:13121107-13121679 FORWARDweakly similar to ( 148) PR13\_HORVU Pathogenesis-related protein PRB1-3 precursor (PR-1B) (HV-8) - Hordeum vulgare (Barley)moderately similar to ( 296) loc\_os02g54560 12002.m10485 protein pathogenesis-related protein PR-1 precursor, putative, expressed seq=cds; coord=5:212617604..212618506:1; parent\_gene=GRMZM2G008406'

'weakly similar to ( 104) AT2G23340 | Symbols: | AP2 domain-containing transcription factor, putative | chr2:9938186-9938716 FORWARDweakly similar to ( 151) loc\_os06g07030 12006.m05428 protein dehydration responsive element binding protein, putative, expressed seq=cds; coord=6:79553937..79555390:1; parent\_gene=GRMZM2G119865'

'moderately similar to ( 243) AT5G52660 | Symbols: | myb family transcription factor | chr5:21359423-21362037 REVERSEmoderately similar to ( 380) loc\_os06g45840 12006.m71450 protein DNA binding protein, putative, expressed seq=cds; coord=6:93096804..93102645:-1; parent\_gene=GRMZM2G057408'

'moderately similar to ( 291) AT1G04640 | Symbols: LIP2 | LIP2 (LIPOYLTRANSFERASE 2); lipoyltransferase | chr1:1292541-1293248 FORWARDmoderately similar to ( 371) loc\_os03g20560 12003.m07463 protein lipoate-protein ligase, putative, expressed seq=cds; coord=6:163874844..163876139:-1; parent\_gene=GRMZM2G085483'

'weakly similar to ( 155) AT4G39700 | Symbols: | heavy-metal-associated domain-containing protein / copper chaperone (CCH)-related | chr4:18424265-18424906 FORWARDmoderately similar to ( 207) loc\_os09g20000 12009.m05207 protein metal ion binding protein, putative, expressed seq=cds; coord=7:99384829..99386078:1; parent\_gene=GRMZM2G086066'

'weakly similar to ( 105) AT3G48030 | Symbols: | hypoxia-responsive family protein / zinc finger (C3HC4-type RING finger) family protein | chr3:17725410-17727954 REVERSEweakly similar to ( 157) loc\_os09g20900 12009.m05297 protein RING-H2 finger protein ATL3I, putative, expressed seq=cds; coord=7:102395898..102397996:1; parent\_gene=GRMZM2G030341'

'moderately similar to ( 211) AT3G48690 | Symbols: ATCXE12, CXE12 | CXE12; carboxylesterase | chr3:18037186-18038160 REVERSEvery weakly similar to (98.2) GID1\_ORYSA Gibberellin receptor GID1 (EC 3.-.-.) (Gibberellin-insensitive dwarf protein 1) (Protein GIBBERELLIN INSENSITIVE DWARF1) - Oryza sativa (Rice)moderately similar to ( 456) loc\_os09g28740 12009.m06025 protein gibberellin receptor GID1L2, putative, expressed seq=cds; coord=7:126910131..126911577:1; parent\_gene=GRMZM2G133836'

'very weakly similar to (89.7) AT3G46730 | Symbols: | disease resistance protein (CC-NBS class), putative | chr3:17213069-17215612 REVERSEmoderately similar to ( 232) loc\_os07g31800 12007.m07447 protein NB-ARC domain containing protein, expressed seq=cds; coord=7:150887968..150889450:1; parent\_gene=GRMZM2G163045'

'moderately similar to ( 413) AT4G03415 | Symbols: | catalytic/ protein serine/threonine phosphatase | chr4:1503789-1505510 REVERSEhighly similar to ( 585) loc\_os07g37890 12007.m08038 protein catalytic/ protein phosphatase type 2C, putative, expressed seq=cds; coord=7:158156920..158160665:-1; parent\_gene=GRMZM2G107565'

'highly similar to ( 506) AT4G32830 | Symbols: AtAUR1 | AtAUR1 (ATAURORA1); histone kinase(H3-S10 specific) / kinase/ protein serine/threonine kinase | chr4:15842557-15844354 FORWARDweakly similar to ( 164) CDPK\_DAUCA Calcium-dependent protein kinase (EC 2.7.11.1) (CDPK) - Daucus carota (Carrot)highly similar to ( 552) loc\_os01g09580 12001.m07583 protein serine/threonine-protein kinase Eg2-like, putative, expressed seq=cds; coord=8:20691284..20698300:1; parent\_gene=GRMZM2G080588'

'moderately similar to ( 449) AT3G24503 | Symbols: ALDH2C4, ALDH1A, REF1 | ALDH2C4; 3-chloroallyl aldehyde dehydrogenase/ aldehyde dehydrogenase (NAD)/ coniferyl-aldehyde dehydrogenase | chr3:8919732-8923029 REVERSEmoderately similar to ( 281) BADH\_BETVU Betaine-aldehyde dehydrogenase, chloroplast precursor (EC 1.2.1.8) (BADH) - Beta vulgaris (Sugar beet)highly similar to ( 575) loc\_os01g40870 12001.m10356 protein aldehyde dehydrogenase, mitochondrial precursor, putative, expressed seq=cds; coord=8:140688554..140691786:1; parent\_gene=GRMZM2G407949'

'very weakly similar to (94.4) AT4G01200 | Symbols: | C2 domain-containing protein | chr4:506783-507535 REVERSEmoderately similar to ( 292) loc\_os01g47040 12001.m10900 protein C2 domain containing protein, expressed seq=cds; coord=8:148351369..148357945:1; parent\_gene=GRMZM2G114538'

'weakly similar to ( 174) AT3G18260 | Symbols: | reticulon family protein (RTNLB9) | chr3:6260328-6261504 REVERSEmoderately similar to ( 278) loc\_os05g47690 12005.m08841 protein seed maturation protein, putative, expressed seq=cds; coord=8:152130316..152133931:1; parent\_gene=GRMZM2G091973'

'weakly similar to ( 144) AT4G13850 | Symbols: ATGRP2 | GR-RBP2 (GLYCINE-RICH RNA-BINDING PROTEIN 2); ATP binding / RNA binding / double-stranded DNA binding / single-stranded DNA binding | chr4:8021314-8022065 FORWARDvery weakly similar to (99.8) ROC2\_NICSY 29 kDa ribonucleoprotein B, chloroplast precursor (CP29B) - Nicotiana sylvestris (Wood tobacco)weakly similar to ( 179) loc\_os01g68790 12001.m43348 protein glycine-rich RNA-binding protein 2, mitochondrial precursor, putative, expressed seq=cds; coord=8:162236975..162239554:-1; parent\_gene=GRMZM2G042118'

'moderately similar to ( 276) AT4G14040 | Symbols: EDA38, SBP2 | SBP2 (SELENIUM-BINDING PROTEIN 2); selenium binding | chr4:8100691-8102828 REVERSEmoderately similar to ( 334) loc\_os01g68770 12001.m12979 protein selenium-binding protein, putative, expressed seq=cds; coord=9:23290887..23295208:1; parent\_gene=GRMZM2G171376'

'moderately similar to ( 276) AT4G14040 | Symbols: EDA38, SBP2 | SBP2 (SELENIUM-BINDING PROTEIN 2); selenium binding | chr4:8100691-8102828 REVERSEmoderately similar to ( 334) loc\_os01g68770 12001.m12979 protein selenium-binding protein, putative, expressed seq=cds; coord=9:23290887..23295208:1; parent\_gene=GRMZM2G171376'

'moderately similar to ( 263) AT1G50180 | Symbols: | disease resistance protein (CC-NBS-LRR class), putative | chr1:18584235-18587136 FORWARDhighly similar to ( 522) loc\_os10g10360 12010.m065236 protein NBS-LRR disease resistance protein, putative, expressed seq=cds; coord=9:25062949..25065642:-1; parent\_gene=GRMZM2G030051'

'moderately similar to ( 482) AT2G02180 | Symbols: TOM3 | TOM3; protein binding | chr2:560976-562961 FORWARDhighly similar to ( 532) loc\_os10g39220 12010.m06692 protein tobamovirus multiplication 3, putative, expressed seq=cds; coord=9:125685665..125692703:1; parent\_gene=GRMZM2G174286'

'highly similar to ( 951) AT2G44980 | Symbols: | transcription regulatory protein SNF2, putative | chr2:18552343-18556669 REVERSEmoderately similar to ( 321) ISW2\_ORYSA Probable chromatin remodelling complex ATPase chain (EC 3.6.1.-) (ISW2-like) (Sucrose nonfermenting protein 2 homolog) - Oryza sativa (Rice)nearly identical (1258) loc\_os03g01200 12003.m05671 protein SNF2P, putative, expressed seq=cds; coord=9:155457208..155470884:-1; parent\_gene=GRMZM2G049168'

'moderately similar to ( 421) AT3G07270 | Symbols: | GTP cyclohydrolase I | chr3:2314005-2317059 FORWARDhighly similar to ( 572) loc\_os04g56710 12004.m10558 protein GTP cyclohydrolase I 1, putative, expressed seq=cds; coord=10:146967602..146972055:-1; parent\_gene=GRMZM2G106376'

'weakly similar to ( 119) AT2G17950 | Symbols: WUS, PGA6, WUS1 | WUS (WUSCHEL); DNA binding / protein binding / transcription factor/ transcription regulator | chr2:7809100-7810671 REVERSEweakly similar to ( 122) WUS\_ANTMA Protein WUSCHEL (Protein ROSULATA) - Antirrhinum majus (Garden snapdragon)weakly similar to ( 168) loc\_os04g56780 12004.m10565 protein protein WUSCHEL, putative, expressed seq=cds; coord=10:147059712..147061055:-1; parent\_gene=GRMZM2G028622'

'nearly identical (1680) AT5G65930 | Symbols: ZWI, PKCBP, KCBP | ZWI (ZWICHEL); calmodulin binding / microtubule motor | chr5:26370369-26376394 REVERSEmoderately similar to ( 217) FLA10\_CHLRE Kinesin-like protein FLA10 (Protein KHP1) - Chlamydomonas reinhardtinearly identical (2143) loc\_os04g57140 12004.m10599 protein kinesin-like calmodulin binding protein, putative, expressed seq=cds; coord=10:147187794..147201486:-1; parent\_gene=GRMZM2G423861'

'moderately similar to ( 326) AT2G39270 | Symbols: | adenylate kinase family protein | chr2:16399983-16401408 FORWARDmoderately similar to ( 307) KADC\_SOLTU Adenylate kinase, chloroplast precursor (EC 2.7.4.3) (ATP-AMP transphosphorylase) - Solanum tuberosum (Potato)moderately similar to ( 390) loc\_os04g57540 12004.m35511 protein adenylate kinase, chloroplast precursor, putative, expressed seq=cds; coord=10:147579294..147582200:-1; parent\_gene=GRMZM2G150014'

'very weakly similar to (94.0) AT5G66940 | Symbols: | Dof-type zinc finger domain-containing protein | chr5:26727989-26728666 REVERSEvery weakly similar to (90.1) PBF\_MAIZE Dof zinc finger protein PBF (Prolamin box-binding factor) - Zea mays (Maize)weakly similar to ( 158) loc\_os04g58190 12004.m35517 protein expressed protein seq=cds; coord=10:148408926..148410383:-1; parent\_gene=GRMZM2G142718'

'weakly similar to ( 177) AT1G21140 | Symbols: | nodulin, putative | chr1:7404464-7405066 FORWARDweakly similar to ( 123) NO21\_SOYBN Nodulin 21 (N-21) - Glycine max (Soybean)moderately similar to ( 205) loc\_os04g59020 12004.m10780 protein integral membrane protein, expressed seq=cds; coord=10:148991785..148992408:1; parent\_gene=AC214046.4\_FG005'



'moderately similar to ( 211) AT5G66760 | Symbols: SDH1-1 | SDH1-1; ATP binding / succinate dehydrogenase | chr5:26653776-26657224 FORWARDmoderately similar to ( 210) DHSA\_ORYSA Succinate dehydrogenase [ubiquinone] flavoprotein subunit, mitochondrial precursor (EC 1.3.5.1) (FP) (Flavoprotein subunit of complex II) - Oryza sativa (Rice)moderately similar to ( 210) loc\_os07g04240 12007.m04893 protein succinate dehydrogenase flavoprotein subunit,mitochondrial precursor, putative, expressed seq=cds; coord=1:64875250..64878499:-1; parent\_gene=GRMZM2G306945'

'moderately similar to ( 211) AT5G66760 | Symbols: SDH1-1 | SDH1-1; ATP binding / succinate dehydrogenase | chr5:26653776-26657224 FORWARDmoderately similar to ( 210) DHSA\_ORYSA Succinate dehydrogenase [ubiquinone] flavoprotein subunit, mitochondrial precursor (EC 1.3.5.1) (FP) (Flavoprotein subunit of complex II) - Oryza sativa (Rice)moderately similar to ( 210) loc\_os07g04240 12007.m04893 protein succinate dehydrogenase flavoprotein subunit,mitochondrial precursor, putative, expressed seq=cds; coord=1:64875250..64878499:-1; parent\_gene=GRMZM2G306945'

'highly similar to ( 651) AT2G26260 | Symbols: AT3BETAHSD/D2 | AT3BETAHSD/D2 (3BETA-HYDROXYSTEROID-DEHYDROGENASE/DECARBOXYLASE ISOFORM 2); 3-beta-hydroxy-delta5-steroid dehydrogenase/ sterol-4-alpha-carboxylate 3-dehydrogenase (decarboxylating) | chr2:11178586-11182872 FORWARDhighly similar to ( 942) loc\_os03g29170 12003.m35269 protein sterol-4-alpha-carboxylate 3-dehydrogenase, decarboxylating, putative, expressed seq=cds; coord=1:70155432..70163966:1; parent\_gene=GRMZM2G149224'

'highly similar to ( 651) AT2G26260 | Symbols: AT3BETAHSD/D2 | AT3BETAHSD/D2 (3BETA-HYDROXYSTEROID-DEHYDROGENASE/DECARBOXYLASE ISOFORM 2); 3-beta-hydroxy-delta5-steroid dehydrogenase/ sterol-4-alpha-carboxylate 3-dehydrogenase (decarboxylating) | chr2:11178586-11182872 FORWARDhighly similar to ( 942) loc\_os03g29170 12003.m35269 protein sterol-4-alpha-carboxylate 3-dehydrogenase, decarboxylating, putative, expressed seq=cds; coord=1:70155432..70163966:1; parent\_gene=GRMZM2G149224'

'moderately similar to ( 434) AT4G24220 | Symbols: VEP1, AWI31 | VEP1 (VEIN PATTERNING 1); binding / catalytic | chr4:12565219-12566474 FORWARDhighly similar to ( 581) loc\_os03g32170 12003.m08461 protein progesterone 5-beta-reductase, putative, expressed seq=cds; coord=1:76154571..76156037:-1; parent\_gene=GRMZM2G138710'

'moderately similar to ( 332) AT1G47510 | Symbols: AT5PTASE11, 5PTASE11 | 5PTASE11 (INOSITOL POLYPHOSPHATE 5-PHOSPHATASE 11); hydrolase/ phosphatidylinositol-3,4,5-trisphosphate 5-phosphatase/ phosphatidylinositol-3,5-bisphosphate 5-phosphatase/ phosphatidylinositol-4,5-bisphosphate 5-phosphatase | chr1:17435991-17438296 REVERSEmoderately similar to ( 491) loc\_os03g42810 12003.m09332 protein type II inositol-1,4,5-trisphosphate 5-phosphatase precursor, putative, expressed seq=cds; coord=1:253792928..253795422:-1; parent\_gene=GRMZM2G043191'

'moderately similar to ( 202) AT3G60460 | Symbols: DUO1 | DUO1 (DUO POLLEN 1); DNA binding / transcription factor | chr3:22342429-22343491 REVERSEweakly similar to ( 133) GAM1\_ORYSA Transcription factor GAMYB (OsGAMyb) - Oryza sativa (Rice)moderately similar to ( 323) loc\_os04g46384 12004.m101864 protein DUO1, putative seq=cds; coord=2:20122023..20123440:-1; parent\_gene=GRMZM2G105137'

'weakly similar to ( 106) loc\_os09g29820 12009.m06133 protein BZIP family transcription factor, putative, expressed seq=cds; coord=2:188366213..188366707:-1; parent\_gene=GRMZM2G137532'

'weakly similar to ( 103) AT5G54900 | Symbols: ATRBP45A | ATRBP45A (RNA-binding protein 45A); RNA binding | chr5:22295412-22298126 FORWARDweakly similar to ( 119) loc\_os03g37270 12003.m08836 protein expressed protein seq=cds; coord=3:917514..921632:1; parent\_gene=GRMZM2G461783'

'moderately similar to ( 472) AT5G24030 | Symbols: SLAH3 | SLAH3 (SLAC1 HOMOLOGUE 3); transporter | chr5:8118618-8120993 REVERSEhighly similar to ( 644) loc\_os01g28840 12001.m09324 protein C4-dicarboxylate transporter/malic acid transport protein, expressed seq=cds; coord=3:131330167..131332146:1; parent\_gene=GRMZM2G447657'

'moderately similar to ( 472) AT5G24030 | Symbols: SLAH3 | SLAH3 (SLAC1 HOMOLOGUE 3); transporter | chr5:8118618-8120993 REVERSEhighly similar to ( 644) loc\_os01g28840 12001.m09324 protein C4-dicarboxylate transporter/malic acid transport protein, expressed seq=cds; coord=3:131330167..131332146:1; parent\_gene=GRMZM2G447657'

'moderately similar to ( 448) AT1G72340 | Symbols: | eukaryotic translation initiation factor 2B family protein / eIF-2B family protein | chr1:27236898-27238482 FORWARDhighly similar to ( 531) loc\_os12g31380 12012.m06947 protein translation initiation factor eIF-2B alpha subunit, putative, expressed seq=cds; coord=3:135445422..135448935:-1; parent\_gene=GRMZM2G084647'

'highly similar to ( 588) AT2G39450 | Symbols: MTP11, ATMTTP11 | MTP11; cation transmembrane transporter/ manganese ion transmembrane transporter/ manganese:hydrogen antiporter | chr2:16471744-16473735 REVERSEhighly similar to ( 716) loc\_os01g62070 12001.m150770 protein metal tolerance protein C3, putative, expressed seq=cds; coord=3:181679706..181688287:1; parent\_gene=GRMZM2G014454'

'weakly similar to ( 197) AT2G40830 | Symbols: RHC1A | RHC1A; protein binding / zinc ion binding | chr2:17043642-17044628 FORWARDmoderately similar to ( 393) loc\_os01g58780 12001.m12020 protein RHC1A, putative, expressed seq=cds; coord=3:187930046..187931023:-1; parent\_gene=AC213654.3\_FG001'

'moderately similar to ( 421) AT1G79340 | Symbols: AtMC4 | AtMC4 (metacaspase 4); cysteine-type peptidase | chr1:29842849-29844368 FORWARDhighly similar to ( 642) loc\_os01g58580 12001.m12000 protein latex-abundant protein, putative, expressed seq=cds; coord=3:188328660..188331609:-1; parent\_gene=GRMZM2G047274'

'moderately similar to ( 386) AT5G54630 | Symbols: | zinc finger protein-related | chr5:22192607-22194260 REVERSEhighly similar to ( 570) loc\_os01g57650 12001.m11914 protein nucleic acid binding protein, putative, expressed seq=cds; coord=3:190062951..190065367:1; parent\_gene=GRMZM2G105224'

'highly similar to ( 537) AT5G47770 | Symbols: FPS1 | FPS1 (FARNESYL DIPHOSPHATE SYNTHASE 1); dimethylallyltransferase/ geranyltransferase | chr5:19345297-19347415 FORWARDhighly similar to ( 617) FPPS\_MAIZE Farnesyl pyrophosphate synthetase (FPP synthetase) (FPS) (Farnesyl diphosphate synthetase) [Includes: Dimethylallyltransferase (EC 2.5.1.1); Geranyltransferase (EC 2.5.1.10)] - Zea mays (Maize)highly similar to ( 657) loc\_os01g50760 12001.m11257 protein farnesyl pyrophosphate synthetase, putative, expressed seq=cds; coord=3:205146239..205150759:-1; parent\_gene=GRMZM2G098569'

'highly similar to ( 868) AT3G58610 | Symbols: | ketol-acid reductoisomerase | chr3:21671561-21674639  
FORWARDhighly similar to ( 858) ILV5\_PEA Ketol-acid reductoisomerase, chloroplast precursor (EC 1.1.1.86)  
(Acetohydroxy-acid reductoisomerase) (Alpha-keto-beta-hydroxylacil reductoisomerase) - Pisum sativum (Garden  
pea)highly similar to ( 920) loc\_os01g46380 12001.m10836 protein ketol-acid reductoisomerase, chloroplast  
precursor, putative, expressed seq=cds; coord=3:213623450..213627174:-1; parent\_gene=GRMZM2G004382'

'highly similar to ( 868) AT3G58610 | Symbols: | ketol-acid reductoisomerase | chr3:21671561-21674639  
FORWARDhighly similar to ( 858) ILV5\_PEA Ketol-acid reductoisomerase, chloroplast precursor (EC 1.1.1.86)  
(Acetohydroxy-acid reductoisomerase) (Alpha-keto-beta-hydroxylacil reductoisomerase) - Pisum sativum (Garden  
pea)highly similar to ( 920) loc\_os01g46380 12001.m10836 protein ketol-acid reductoisomerase, chloroplast  
precursor, putative, expressed seq=cds; coord=3:213623450..213627174:-1; parent\_gene=GRMZM2G004382'

'weakly similar to ( 174) AT1G68200 | Symbols: | zinc finger (CCCH-type) family protein | chr1:25562118-25563948  
FORWARDmoderately similar to ( 234) loc\_os01g45730 12001.m10773 protein nucleic acid binding protein, putative  
seq=cds; coord=3:214751394..214753488:1; parent\_gene=GRMZM2G157927'

'highly similar to ( 606) AT3G01490 | Symbols: | protein kinase, putative | chr3:191095-193258 REVERSEvery  
weakly similar to (94.0) CRI4\_MAIZE Putative receptor protein kinase CRINKLY4 precursor (EC 2.7.11.1) - Zea  
mays (Maize)highly similar to ( 690) loc\_os01g45380 12001.m10741 protein ATP binding protein, putative, expressed  
seq=cds; coord=3:215213789..215219139:-1; parent\_gene=GRMZM2G088299'

'highly similar to ( 538) AT4G16745 | Symbols: | exostosin family protein | chr4:9412185-9414053 FORWARDhighly  
similar to ( 709) loc\_os01g45350 12001.m10738 protein limonene cyclase like protein, putative, expressed seq=cds;  
coord=3:215380332..215382314:-1; parent\_gene=GRMZM2G048010'

'weakly similar to ( 131) AT3G21330 | Symbols: | basic helix-loop-helix (bHLH) family protein | chr3:7507720-  
7508841 FORWARDvery weakly similar to (80.9) LAX\_ORYSA Transcription factor LAX PANICLE - Oryza sativa  
(Rice)moderately similar to ( 216) loc\_os01g38610 12001.m10144 protein DNA binding protein, putative, expressed  
seq=cds; coord=3:219181998..219183697:-1; parent\_gene=GRMZM2G081816'

'highly similar to ( 691) AT3G19760 | Symbols: | eukaryotic translation initiation factor 4A, putative / eIF-4A,  
putative / DEAD box RNA helicase, putative | chr3:6863790-6866242 FORWARDhighly similar to ( 699)  
IF4A3\_NICPL Eukaryotic initiation factor 4A-3 (EC 3.6.1.-) (ATP-dependent RNA helicase eIF4A-3) (eIF-4A-3) -  
Nicotiana plumbaginifolia (Leadwort-leaved tobacco)highly similar to ( 760) loc\_os01g45190 12001.m43108 protein  
eukaryotic initiation factor 4A-3, putative, expressed seq=cds; coord=4:168987228..168990822:1;  
parent\_gene=GRMZM2G018947'

'moderately similar to ( 466) AT4G28860 | Symbols: ck14 | ck14 (Casein Kinase I-like 4); ATP binding / kinase/ protein  
kinase/ protein serine/threonine kinase | chr4:14246359-14248823 FORWARDhighly similar to ( 619)  
loc\_os02g17910 12002.m33640 protein casein kinase I isoform delta-like, putative, expressed seq=cds;  
coord=4:221511072..221528585:-1; parent\_gene=GRMZM2G147026'

'moderately similar to ( 428) AT5G53140 | Symbols: | protein phosphatase 2C, putative / PP2C, putative | chr5:21549228-21552132 FORWARDhighly similar to ( 518) loc\_os02g15594 12002.m06802 protein catalytic/ protein phosphatase type 2C/ protein serine/threonine phosphatase, putative, expressed seq=cds; coord=4:225064123..225073527:1; parent\_gene=GRMZM2G073788'

'highly similar to ( 663) AT1G51680 | Symbols: 4CL1, 4CL.1, AT4CL1 | 4CL1 (4-COUMARATE:COA LIGASE 1); 4 coumarate-CoA ligase | chr1:19159080-19161464 REVERSEhighly similar to ( 691) 4CL1\_PETCR 4-coumarate--CoA ligase 1 (EC 6.2.1.12) (4CL 1) (4-coumaroyl-CoA synthase 1) - Petroselinum crispum (Parsley) (Petroselinum hortense)highly similar to ( 896) loc\_os02g08100 12002.m06156 protein 4-coumarate--CoA ligase 1, putative, expressed seq=cds; coord=5:89152269..89156855:-1; parent\_gene=GRMZM2G075333'

'highly similar to ( 936) AT5G25060 | Symbols: | RNA recognition motif (RRM)-containing protein | chr5:8634219-8639984 REVERSEearly identical (1183) loc\_os02g08360 12002.m06182 protein RNA binding protein, putative, expressed seq=cds; coord=5:91582816..91615388:1; parent\_gene=GRMZM2G174785'

'moderately similar to ( 417) AT2G28315 | Symbols: | LOCATED IN: membrane; CONTAINS InterPro DOMAIN/s: Protein of unknown function DUF250 (InterPro:IPR004853); BEST Arabidopsis thaliana protein match is: transporter-related (TAIR:AT1G06890.2); Has 1852 Blast hits to 1847 proteins in 207 species: Archae - 0; Bacteria - 58; Metazoa - 582; Fungi - 250; Plants - 685; Viruses - 0; Other Eukaryotes - 277 (source: NCBI BLINK). | chr2:12088896-12090570 FORWARDhighly similar to ( 571) loc\_os02g41780 12002.m09215 protein integral membrane protein like, putative, expressed seq=cds; coord=5:186828333..186832230:-1; parent\_gene=GRMZM2G068714'

'weakly similar to ( 110) AT5G08410 | Symbols: FTRA2 | FTRA2 (ferredoxin/thioredoxin reductase subunit A (variable subunit) 2); catalytic/ ferredoxin reductase/ ferredoxin:thioredoxin reductase/ lipoate synthase | chr5:2709974-2710528 REVERSEweakly similar to ( 172) FTRV\_MAIZE Ferredoxin-thioredoxin reductase, variable chain (FTR-V) (Ferredoxin-thioredoxin reductase subunit A) (FTR-A) - Zea mays (Maize)weakly similar to ( 153) loc\_os02g42570 12002.m09292 protein ferredoxin-thioredoxin reductase, variable chain, putative, expressed seq=cds; coord=5:188659577..188660503:-1; parent\_gene=GRMZM2G139803'

'weakly similar to ( 150) AT1G76800 | Symbols: | nodulin, putative | chr1:28829345-28829935 FORWARDweakly similar to ( 120) NO21\_SOYBN Nodulin 21 (N-21) - Glycine max (Soybean)weakly similar to ( 174) loc\_os02g43030 12002.m09338 protein conserved membrane associated protein, DUF125, putative, expressed seq=cds; coord=5:189865490..189866191:-1; parent\_gene=GRMZM2G409358'

'nearly identical (1013) AT4G12650 | Symbols: | LOCATED IN: integral to membrane, Golgi apparatus, plasma membrane, vacuole; EXPRESSED IN: 25 plant structures; EXPRESSED DURING: 13 growth stages; CONTAINS InterPro DOMAIN/s: Nonaspanin (TM9SF) (InterPro:IPR004240); BEST Arabidopsis thaliana protein match is: unknown protein (TAIR:AT5G35160.1); Has 983 Blast hits to 980 proteins in 161 species: Archae - 0; Bacteria - 0; Metazoa - 434; Fungi - 144; Plants - 228; Viruses - 0; Other Eukaryotes - 177 (source: NCBI BLINK). | chr4:7468207-7470165 REVERSEearly identical (1152) loc\_os02g49050 12002.m100343 protein transmembrane 9 superfamily protein member 4, putative, expressed seq=cds; coord=5:204006064..204008467:1; parent\_gene=GRMZM2G018126'

'highly similar to ( 612) AT1G73660 | Symbols: | protein kinase family protein | chr1:27692247-27696718 REVERSEvery weakly similar to ( 97.8) PSKR\_DAUCA Phytosulfokine receptor precursor (EC 2.7.11.1) (Phytosulfokine LRR receptor kinase) - Daucus carota (Carrot)nearly identical (1146) loc\_os02g50970 12002.m33450 protein protein kinase domain containing protein, expressed seq=cds; coord=5:206622614..206635150:-1; parent\_gene=GRMZM2G127632'

'nearly identical (1182) AT1G26830 | Symbols: CUL3A, ATCUL3A, ATCUL3, CUL3 | ATCUL3 (ARABIDOPSIS THALIANA CULLIN 3); protein binding / ubiquitin-protein ligase | chr1:9296063-9298374 FORWARDnearly identical (1392) loc\_os02g51180 12002.m10152 protein cullin-4B, putative, expressed seq=cds; coord=5:207060907..207063925:-1; parent\_gene=GRMZM2G380184'

'weakly similar to ( 106) AT1G72230 | Symbols: | plastocyanin-like domain-containing protein | chr1:27188287-27189093 FORWARDweakly similar to ( 116) BCP\_PEA Blue copper protein precursor - Pisum sativum (Garden pea)weakly similar to ( 150) loc\_os02g52180 12002.m10249 protein uclacyanin-2 precursor, putative, expressed seq=cds; coord=5:208891470..208892610:-1; parent\_gene=GRMZM2G045927'

'weakly similar to ( 144) AT1G12680 | Symbols: PEPKR2 | PEPKR2 (Phosphoenolpyruvate carboxylase-related kinase 2); ATP binding / kinase/ protein kinase/ protein serine/threonine kinase | chr1:4320123-4322269 REVERSEweakly similar to ( 181) loc\_os09g29170 12009.m21997 protein calcium-dependent protein kinase, putative, expressed seq=cds; coord=6:32897930..32901697:-1; parent\_gene=GRMZM2G395569'

'very weakly similar to ( 93.2) AT5G43320 | Symbols: ckl8 | ckl8 (Casein Kinase I-like 8); ATP binding / kinase/ protein kinase/ protein serine/threonine kinase | chr5:17386043-17388941 REVERSEvery weakly similar to ( 100) loc\_os02g56560 12002.m77862 protein casein kinase I isoform delta-like, putative, expressed seq=cds; coord=6:43344835..43349464:-1; parent\_gene=GRMZM2G456423'

'weakly similar to ( 183) AT1G31490 | Symbols: | transferase family protein | chr1:11271744-11273078 REVERSEhighly similar to ( 577) loc\_os06g05790 12006.m05305 protein transferase, putative, expressed seq=cds; coord=6:73908832..73911106:1; parent\_gene=GRMZM2G362298'

'weakly similar to ( 183) AT1G31490 | Symbols: | transferase family protein | chr1:11271744-11273078 REVERSEhighly similar to ( 577) loc\_os06g05790 12006.m05305 protein transferase, putative, expressed seq=cds; coord=6:73908832..73911106:1; parent\_gene=GRMZM2G362298'

'weakly similar to ( 181) AT2G43190 | Symbols: | ribonuclease P family protein | chr2:17956220-17957833 FORWARDmoderately similar to ( 438) loc\_os05g39530 12005.m083751 protein ribonuclease P/ ribonuclease, putative, expressed seq=cds; coord=6:74035080..74038340:-1; parent\_gene=GRMZM2G047265'

'weakly similar to ( 181) AT4G38130 | Symbols: HD1, ATHD1, HDA1, RPD3A, HDA19 | HD1 (HISTONE DEACETYLASE 1); basal transcription repressor/ histone deacetylase/ protein binding | chr4:17896663-17899057 REVERSEweakly similar to ( 187) HDAC\_MAIZE Probable histone deacetylase (RPD3 homolog) - Zea mays (Maize)moderately similar to ( 207) loc\_os06g38470 12006.m32104 protein histone deacetylase, putative, expressed seq=cds; coord=6:168195273..168196277:-1; parent\_gene=GRMZM2G367886'

'highly similar to ( 536) AT4G01100 | Symbols: ADNT1 | ADNT1 (ADENINE NUCLEOTIDE TRANSPORTER 1); ADP transmembrane transporter/ AMP transmembrane transporter/ ATP transmembrane transporter/ binding | chr4:477411-479590 FORWARDweakly similar to ( 153) BT1\_MAIZE Protein brittle-1, chloroplast precursor - Zea mays (Maize)highly similar to ( 630) loc\_os05g50840 12005.m083826 protein Grave disease carrier protein, putative, expressed seq=cds; coord=6:168175955..168188092:1; parent\_gene=GRMZM2G067877'

'weakly similar to ( 160) loc\_os07g05390 12007.m05003 protein expressed protein seq=cds;  
coord=7:5072345..5075429:-1; parent\_gene=GRMZM2G093766'

'moderately similar to ( 354) AT5G24090 | Symbols: | acidic endochitinase (CHIB1) | chr5:8143805-8145153  
REVERSEmoderately similar to ( 382) CHIA\_TOBAC Acidic endochitinase precursor (EC 3.2.1.14) - Nicotiana  
tabacum (Common tobacco)moderately similar to ( 496) loc\_os07g19040 12007.m06343 protein acidic endochitinase  
precursor, putative seq=cds; coord=7:31323387..31324388:-1; parent\_gene=GRMZM2G160265'

'weakly similar to ( 200) AT3G02520 | Symbols: GRF7, GF14 NU | GRF7 (GENERAL REGULATORY FACTOR 7);  
protein binding / protein phosphorylated amino acid binding | chr3:526800-527915 REVERSEmoderately similar to ( 228) 14334\_ORYSA 14-3-3-like protein GF14-D (G-box factor 14-3-3 homolog D) - Oryza sativa (Rice)moderately  
similar to ( 228) loc\_os11g34450 12011.m07303 protein 14-3-3-like protein, putative, expressed seq=cds;  
coord=7:159919660..159920834:-1; parent\_gene=GRMZM2G305211'

'weakly similar to ( 193) AT1G06260 | Symbols: | cysteine proteinase, putative | chr1:1916449-1917585  
FORWARDweakly similar to ( 184) ORYA\_ORYSA Oryzain alpha chain precursor (EC 3.4.22.-) - Oryza sativa  
(Rice)moderately similar to ( 260) loc\_os09g21370 12009.m05344 protein cysteine proteinase EP-B 1 precursor,  
putative, expressed seq=cds; coord=7:162858798..162860272:-1; parent\_gene=GRMZM2G049882'

'weakly similar to ( 125) AT1G18650 | Symbols: PDCB3 | PDCB3 (PLASMODESMATA CALLOSE-BINDING  
PROTEIN 3); callose binding / polysaccharide binding | chr1:6419036-6420413 REVERSEvery weakly similar to  
(90.9) E13B\_WHEAT Glucan endo-1,3-beta-glucosidase precursor (EC 3.2.1.39) ((1->3)-beta-glucan endohydrolase)  
((1->3)-beta-glucanase) (Beta-1,3-endoglucanase) - Triticum aestivum (Wheat)weakly similar to ( 165)  
loc\_os07g40940 12007.m08334 protein glucan endo-1,3-beta-glucosidase 3 precursor, putative, expressed seq=cds;  
coord=7:163670331..163673084:1; parent\_gene=GRMZM2G131262'

'moderately similar to ( 251) AT2G18110 | Symbols: | elongation factor 1-beta, putative / EF-1-beta, putative |  
chr2:7872636-7873713 FORWARDmoderately similar to ( 288) EF1D1\_ORYSA Elongation factor 1-delta 1 (EF-1-  
delta 1) (Elongation factor 1B-beta 1) (eEF-1B beta 1) - Oryza sativa (Rice)moderately similar to ( 290)  
loc\_os07g42300 12007.m08465 protein elongation factor 1-delta 1, putative, expressed seq=cds;  
coord=7:165383929..165386707:-1; parent\_gene=GRMZM2G031545'

'moderately similar to ( 352) AT3G06560 | Symbols: | polynucleotide adenylyltransferase/ protein binding |  
chr3:2044443-2047034 FORWARDhighly similar to ( 560) loc\_os07g48890 12007.m09098 protein poly, putative,  
expressed seq=cds; coord=7:174102328..174107989:-1; parent\_gene=GRMZM2G470461'

'highly similar to ( 693) AT3G28730 | Symbols: ATHMG, SSRP1, NFD | ATHMG (ARABIDOPSIS THALIANA  
HIGH MOBILITY GROUP); transcription factor | chr3:10784954-10788498 FORWARDnearly identical (1102)  
SSRP1\_MAIZE FACT complex subunit SSRP1 (Facilitates chromatin transcription complex subunit SSRP1)  
(Recombination signal sequence recognition protein 1) (Zm-SSRP1) - Zea mays (Maize)highly similar to ( 997)  
loc\_os01g08970 12001.m42895 protein structure-specific recognition protein 1, putative, expressed seq=cds;  
coord=8:21824201..21831003:-1; parent\_gene=GRMZM2G032252'

'moderately similar to ( 248) AT3G07880 | Symbols: | Rho GDP-dissociation inhibitor family protein | chr3:2514175-  
2515544 FORWARDmoderately similar to ( 348) loc\_os01g68540 12001.m12957 protein rho GDP-dissociation  
inhibitor 1, putative, expressed seq=cds; coord=8:110181330..110183162:-1; parent\_gene=GRMZM2G072089'

'weakly similar to ( 151) AT5G59770 | Symbols: | FUNCTIONS IN: molecular\_function unknown; INVOLVED IN: biological\_process unknown; LOCATED IN: cellular\_component unknown; EXPRESSED IN: 22 plant structures; EXPRESSED DURING: 13 growth stages; CONTAINS InterPro DOMAIN/s: Protein-tyrosine phosphatase-like, PTPLA (InterPro:IPR007482); BEST Arabidopsis thaliana protein match is: PAS2 (PASTICCINO 2); enoyl-CoA hydratase/ protein tyrosine phosphatase (TAIR:AT5G10480.2); Has 525 Blast hits to 525 proteins in 144 species: Archae - 0; Bacteria - 0; Metazoa - 286; Fungi - 120; Plants - 70; Viruses - 0; Other Eukaryotes - 49 (source: NCBI BLINK). | chr5:24079521-24081195 REVERSEmoderately similar to ( 230) loc\_os05g38590 12005.m08038 protein tyrosine phosphatase-like protein PTPLB, putative, expressed seq=cds; coord=8:116854743..116858013:-1; parent\_gene=GRMZM2G035202'

'highly similar to ( 803) AT2G13620 | Symbols: ATCHX15, CHX15 | ATCHX15; monovalent cation:proton antiporter/ sodium:hydrogen antiporter | chr2:5678006-5680621 FORWARDnearly identical (1224) loc\_os05g40650 12005.m08241 protein ATCHX15, putative, expressed seq=cds; coord=8:119266312..119269960:-1; parent\_gene=GRMZM2G138817'

'weakly similar to ( 191) AT1G56440 | Symbols: | serine/threonine protein phosphatase-related | chr1:21138765-21141482 REVERSEmoderately similar to ( 278) loc\_os05g03910 12005.m04925 protein TPR Domain containing protein, expressed seq=cds; coord=8:130726762..130731051:1; parent\_gene=GRMZM2G034043'

'very weakly similar to (82.4) AT1G75270 | Symbols: DHAR2 | DHAR2 (DEHYDROASCORBATE REDUCTASE 2); glutathione binding / glutathione dehydrogenase (ascorbate) | chr1:28250255-28251237 REVERSEvery weakly similar to (89.4) loc\_os05g02530 12005.m04789 protein chloride intracellular channel 6, putative, expressed seq=cds; coord=8:133175515..133176352:1; parent\_gene=GRMZM2G005710'

'moderately similar to ( 214) AT3G25220 | Symbols: FKBP15-1 | FKBP15-1; FK506 binding / peptidyl-prolyl cis-trans isomerase | chr3:9182691-9184463 FORWARDmoderately similar to ( 203) FKBP15\_VICFA FK506-binding protein 2 precursor (EC 5.2.1.8) (Peptidyl-prolyl cis-trans isomerase) (PPIase) (Rotamase) (15 kDa FKBP) (FKBP-15) - Vicia faba (Broad bean)moderately similar to ( 248) loc\_os01g68710 12001.m150820 protein FK506-binding protein 2-1 precursor, putative, expressed seq=cds; coord=8:162534879..162538967:1; parent\_gene=GRMZM2G031204'

'highly similar to ( 559) AT2G41790 | Symbols: | peptidase M16 family protein / insulinase family protein | chr2:17429453-17436110 REVERSEhighly similar to ( 738) loc\_os01g57073 12001.m11864 protein insulin-degrading enzyme, putative, expressed seq=cds; coord=8:172180747..172198680:-1; parent\_gene=GRMZM2G133249'

'moderately similar to ( 370) AT4G18800 | Symbols: ATHSGBP, ATRAB11B, ATRABA1D | ATRABA1D (ARABIDOPSIS RAB GTPASE HOMOLOG A1D); GTP binding | chr4:10320156-10321339 REVERSEmoderately similar to ( 417) RIC2\_ORYSA Ras-related protein RIC2 - Oryza sativa (Rice)moderately similar to ( 417) loc\_os06g35814 12006.m08118 protein ras-related protein RIC2, putative, expressed seq=cds; coord=9:76755814..76760164:1; parent\_gene=GRMZM2G018619'

'weakly similar to ( 103) AT5G56960 | Symbols: | basic helix-loop-helix (bHLH) family protein | chr5:23038703-23041174 REVERSEmoderately similar to ( 221) loc\_os06g37410 12006.m08276 protein helix-loop-helix DNA-binding domain containing protein seq=cds; coord=9:79118794..79123438:1; parent\_gene=GRMZM2G340177'

'weakly similar to ( 140) AT1G69720 | Symbols: ho3 | ho3 (HEME OXYGENASE 3); heme oxygenase (decyclizing) | chr1:26227178-26228164 FORWARDweakly similar to ( 179) loc\_os06g40080 12006.m08545 protein heme oxygenase 1, putative, expressed seq=cds; coord=9:88985396..88986632:-1; parent\_gene=GRMZM2G157936'

'highly similar to ( 714) AT3G13770 | Symbols: | pentatricopeptide (PPR) repeat-containing protein | chr3:4519647-4521533 FORWARDvery weakly similar to (86.7) RF1\_ORYSA Rf1 protein, mitochondrial precursor (PPR protein) (Fertility restorer) (Restorer for CMS) - Oryza sativa (Rice)highly similar to ( 939) loc\_os06g41040 12006.m08639 protein pentatricopeptide repeat protein PPR1106-17, putative, expressed seq=cds; coord=9:101332438..101335090:1; parent\_gene=GRMZM2G143377'

'moderately similar to ( 216) AT1G65680 | Symbols: ATEXPB2, EXPB2, ATHEXP BETA 1.4 | ATEXPB2 (ARABIDOPSIS THALIANA EXPANSIN B2) | chr1:24427266-24428399 FORWARDmoderately similar to ( 424) EXPB3\_ORYSA Expansin-B3 precursor (OsEXPB3) (Beta-expansin-3) (OsaEXPb1.10) - Oryza sativa (Rice)moderately similar to ( 424) loc\_os10g40720 12010.m06840 protein beta-expansin 1a precursor, putative, expressed seq=cds; coord=9:116268809..116270671:1; parent\_gene=GRMZM2G013671'

'weakly similar to ( 191) AT3G11450 | Symbols: | DNAJ heat shock N-terminal domain-containing protein / cell division protein-related | chr3:3605459-3607477 REVERSE seq=cds; coord=9:116818179..116819389:-1; parent\_gene=AC191253.3\_FG004'

'moderately similar to ( 312) AT5G38710 | Symbols: | proline oxidase, putative / osmotic stress-responsive proline dehydrogenase, putative | chr5:15501340-15503899 FORWARDhighly similar to ( 506) loc\_os10g40360 12010.m06805 protein proline oxidase, mitochondrial precursor, putative, expressed seq=cds; coord=9:117306636..117309311:-1; parent\_gene=GRMZM2G117956'

'moderately similar to ( 238) AT3G25780 | Symbols: AOC3 | AOC3 (ALLENE OXIDE CYCLASE 3); allene-oxide cyclase | chr3:9409362-9410409 FORWARDmoderately similar to ( 337) loc\_os03g32314 12003.m08473 protein allene oxide cyclase 4, chloroplast precursor, putative, expressed seq=cds; coord=9:124917394..124918766:-1; parent\_gene=GRMZM2G415793'

'highly similar to ( 525) AT4G38520 | Symbols: | protein phosphatase 2C family protein / PP2C family protein | chr4:18015999-18017514 REVERSEhighly similar to ( 685) loc\_os10g39780 12010.m065325 protein protein phosphatase 2C, putative, expressed seq=cds; coord=9:126336491..126340954:1; parent\_gene=GRMZM2G108309'

'moderately similar to ( 343) AT5G67500 | Symbols: VDAC2, ATVDAC2 | VDAC2 (VOLTAGE DEPENDENT ANION CHANNEL 2); voltage-gated anion channel | chr5:26935223-26937123 FORWARDmoderately similar to ( 267) VDAC2\_SOLTU 36 kDa outer mitochondrial membrane protein porin (Voltage-dependent anion-selective channel protein) (VDAC) (POM 36) - Solanum tuberosum (Potato)moderately similar to ( 480) loc\_os03g10510 12003.m35080 protein outer mitochondrial membrane protein porin, putative, expressed seq=cds; coord=9:147891545..147896754:1; parent\_gene=GRMZM2G137985'

'very weakly similar to (86.7) AT5G64080 | Symbols: | protease inhibitor/seed storage/lipid transfer protein (LTP) family protein | chr5:25645475-25646638 REVERSEweakly similar to ( 140) loc\_os03g09230 12003.m35062 protein xylogen protein 1, putative, expressed seq=cds; coord=9:149245864..149247159:1; parent\_gene=GRMZM2G004466'



'moderately similar to ( 448) AT1G77280 | Symbols: | protein kinase family protein | chr1:29031468-29035882 REVERSEweakly similar to ( 183) NOR\_K\_PEA Nodulation receptor kinase precursor (EC 2.7.11.1) - Pisum sativum (Garden pea)highly similar to ( 717) loc\_os12g07990 12012.m04786 protein ATP binding protein, putative seq=cds; coord=10:10826331..10829269:-1; parent\_gene=GRMZM2G418432'

'moderately similar to ( 268) AT1G74250 | Symbols: | DNAJ heat shock N-terminal domain-containing protein | chr1:27920328-27922414 FORWARDhighly similar to ( 608) loc\_os12g31840 12012.m06992 protein heat shock protein binding protein, putative, expressed seq=cds; coord=10:16655144..16659692:-1; parent\_gene=GRMZM2G130127'

'moderately similar to ( 229) AT2G03690 | Symbols: | coenzyme Q biosynthesis Coq4 family protein / ubiquinone biosynthesis Coq4 family protein | chr2:1122122-1123011 REVERSEmoderately similar to ( 273) loc\_os05g09650 12005.m05478 protein ubiquinone biosynthesis protein COQ4, putative, expressed seq=cds; coord=10:147886519..147887415:1; parent\_gene=GRMZM2G092365'

'very weakly similar to (80.9) AT4G00630 | Symbols: KEA2, ATKEA2 | KEA2; potassium ion transmembrane transporter/ potassium:hydrogen antiporter | chr4:261655-267789 REVERSEvery weakly similar to (94.7) loc\_os04g58620 12004.m10744 protein KEA1, putative, expressed seq=cds; coord=10:148570662..148572508:-1; parent\_gene=GRMZM2G039797'

'weakly similar to ( 179) AT3G51320 | Symbols: | INVOLVED IN: biological\_process unknown; EXPRESSED IN: 16 plant structures; EXPRESSED DURING: 6 growth stages; CONTAINS InterPro DOMAIN/s: Pentatricopeptide repeat (InterPro:IPR002885); BEST Arabidopsis thaliana protein match is: binding (TAIR:AT3G62890.1); Has 12158 Blast hits to 4373 proteins in 95 species: Archae - 0; Bacteria - 0; Metazoa - 23; Fungi - 18; Plants - 12009; Viruses - 0; Other Eukaryotes - 108 (source: NCBI BLINK). | chr3:19049853-19051445 REVERSEweakly similar to ( 133) loc\_os06g40860 12006.m08621 protein EMB2261, putative, expressed seq=cds; coord=10:148782774..148783645:-1; parent\_gene=GRMZM2G478807'

'moderately similar to ( 253) AT1G49180 | Symbols: | protein kinase family protein | chr1:18184840-18187444 REVERSEweakly similar to ( 128) CDPK\_DAUCA Calcium-dependent protein kinase (EC 2.7.11.1) (CDPK) - Daucus carota (Carrot)moderately similar to ( 409) loc\_os04g58990 12004.m10777 protein MAP/microtubule affinity-regulating kinase 4, putative, expressed seq=cds; coord=10:148972118..148974136:-1; parent\_gene=GRMZM2G104658'

'moderately similar to ( 244) AT2G17040 | Symbols: anac036 | anac036 (Arabidopsis NAC domain containing protein 36); transcription factor | chr2:7407123-7408120 FORWARDweakly similar to ( 176) NAC68\_ORYSA NAC domain-containing protein 68 (ONAC068) - Oryza sativa (Rice)moderately similar to ( 340) loc\_os03g04070 12003.m05939 protein NAC domain-containing protein 68, putative, expressed seq=cds; coord=1:7488692..7490758:-1; parent\_gene=GRMZM2G059428'

'moderately similar to ( 207) AT3G14205 | Symbols: | phosphoinositide phosphatase family protein | chr3:4716008-4720524 REVERSEmoderately similar to ( 449) loc\_os03g08430 12003.m35047 protein SAC domain-containing protein 3, putative, expressed seq=cds; coord=1:17245821..17260824:1; parent\_gene=GRMZM2G097434'

'highly similar to ( 512) AT1G74910 | Symbols: | ADP-glucose pyrophosphorylase family protein | chr1:28135770-28138456 REVERSEhighly similar to ( 603) loc\_os03g11050 12003.m35086 protein mannose-1-phosphate guanyltransferase, putative, expressed seq=cds; coord=1:21196693..21221560:1; parent\_gene=GRMZM2G064841'

'highly similar to ( 512) AT1G74910 | Symbols: | ADP-glucose pyrophosphorylase family protein | chr1:28135770-28138456 REVERSEhighly similar to ( 603) loc\_os03g11050 12003.m35086 protein mannose-1-phosphate guanyltransferase, putative, expressed seq=cds; coord=1:21196693..21221560:1; parent\_gene=GRMZM2G064841'

'highly similar to ( 570) AT2G37500 | Symbols: | arginine biosynthesis protein ArgJ family | chr2:15739904-15742430 REVERSEhighly similar to ( 729) loc\_os03g17120 12003.m34841 protein arginine biosynthesis bifunctional protein argJ 1, putative, expressed seq=cds; coord=1:41956891..41966584:-1; parent\_gene=GRMZM2G044237'

'highly similar to ( 787) AT3G47340 | Symbols: ASN1, DIN6, AT-ASN1 | ASN1 (GLUTAMINE-DEPENDENT ASPARAGINE SYNTHASE 1); asparagine synthase (glutamine-hydrolyzing) | chr3:17438445-17441043 REVERSEhighly similar to ( 871) ASNS\_MAIZE Asparagine synthetase [glutamine-hydrolyzing] (EC 6.3.5.4) (Glutamine-dependent asparagine synthetase) - Zea mays (Maize)highly similar to ( 971) loc\_os03g18130 12003.m101311 protein asparagine synthetase, putative, expressed seq=cds; coord=1:45114258..45118291:-1; parent\_gene=GRMZM2G053669'

'weakly similar to ( 198) AT2G38440 | Symbols: ITB1, SCAR2, DIS3, WAVE4, ATSCAR2 | SCAR2 (SCAR HOMOLOG 2) | chr2:16095550-16100851 FORWARDweakly similar to ( 192) SCRL1\_ORYSA SCAR-like protein 1 - Oryza sativa (Rice)highly similar to ( 598) loc\_os03g18710 12003.m07292 protein expressed protein seq=cds; coord=1:46576198..46582130:-1; parent\_gene=GRMZM2G104534'

'moderately similar to ( 229) AT1G56500 | Symbols: | haloacid dehalogenase-like hydrolase family protein | chr1:21159775-21167092 FORWARDmoderately similar to ( 349) loc\_os03g19760 12003.m35188 protein NHL repeat protein, putative, expressed seq=cds; coord=1:50700350..50712129:1; parent\_gene=AC208571.4\_FG001'

'moderately similar to ( 263) AT5G49620 | Symbols: AtMYB78 | AtMYB78 (myb domain protein 78); DNA binding / transcription factor | chr5:20137491-20139384 REVERSEweakly similar to ( 164) MYBA2\_ORYSA Myb-related protein MYBAS2 - Oryza sativa (Rice)moderately similar to ( 343) loc\_os03g20090 12003.m101325 protein MYB transcription factor, putative, expressed seq=cds; coord=1:51397954..51400225:-1; parent\_gene=GRMZM2G070849'

'moderately similar to ( 262) AT1G08845 | Symbols: | structural constituent of ribosome | chr1:2838789-2840955 FORWARDmoderately similar to ( 334) loc\_os10g41050 12010.m06870 protein expressed protein seq=cds; coord=1:90225656..90230346:-1; parent\_gene=GRMZM2G154487'

'weakly similar to ( 150) AT2G45050 | Symbols: | zinc finger (GATA type) family protein | chr2:18582958-18583845 FORWARDmoderately similar to ( 362) loc\_os10g40810 12010.m06851 protein GATA transcription factor 9, putative, expressed seq=cds; coord=1:90953352..90955047:1; parent\_gene=GRMZM2G113098'

'weakly similar to ( 150) AT2G45050 | Symbols: | zinc finger (GATA type) family protein | chr2:18582958-18583845 FORWARDmoderately similar to ( 362) loc\_os10g40810 12010.m06851 protein GATA transcription factor 9, putative, expressed seq=cds; coord=1:90953352..90955047:1; parent\_gene=GRMZM2G113098'

'moderately similar to ( 399) AT1G30300 | Symbols: | unknown protein | chr1:10673084-10675061  
FORWARDmoderately similar to ( 476) loc\_os03g44140 12003.m09452 protein OsWAK26 - OsWAK receptor-like  
protein kinase, expressed seq=cds; coord=1:251155890..251159010:1; parent\_gene=GRMZM2G103610'

'moderately similar to ( 236) AT2G42800 | Symbols: AtRLP29 | AtRLP29 (Receptor Like Protein 29); protein binding |  
chr2:17808157-17809545 REVERSEweakly similar to ( 122) RPK1\_IPONI Receptor-like protein kinase precursor  
(EC 2.7.11.1) - Ipomoea nil (Japanese morning glory) (Pharbitis nil)moderately similar to ( 320) loc\_os03g44270  
12003.m09466 protein retrotransposon protein, putative, Ty1-copia subclass seq=cds;  
coord=1:251112471..251114311:1; parent\_gene=GRMZM2G081099'

'highly similar to ( 516) AT2G28930 | Symbols: APK1B | APK1B; ATP binding / kinase/ protein kinase/ protein  
serine/threonine kinase | chr2:12424551-12426565 FORWARDmoderately similar to ( 233) NORK\_MEDTR  
Nodulation receptor kinase precursor (EC 2.7.11.1) (Does not make infections protein 2) (Symbiosis receptor-like  
kinase) (MtSYMRK) - Medicago truncatula (Barrel medic)highly similar to ( 647) loc\_os03g60710 12003.m10960  
protein protein kinase APK1B, chloroplast precursor, putative, expressed seq=cds; coord=1:293623063..293627778:1;  
parent\_gene=GRMZM2G068117'

'moderately similar to ( 268) AT4G36920 | Symbols: AP2, FLO2, FL1 | AP2 (APETALA 2); transcription factor |  
chr4:17400998-17403140 FORWARDweakly similar to ( 130) BBM2\_BRANA Protein BABY BOOM 2 (BnBBM2) -  
Brassica napus (Rape)moderately similar to ( 382) loc\_os04g55560 12004.m35488 protein AP2 domain containing  
protein, expressed seq=cds; coord=2:5514479..5518846:-1; parent\_gene=GRMZM2G174784'

'moderately similar to ( 268) AT4G36920 | Symbols: AP2, FLO2, FL1 | AP2 (APETALA 2); transcription factor |  
chr4:17400998-17403140 FORWARDweakly similar to ( 130) BBM2\_BRANA Protein BABY BOOM 2 (BnBBM2) -  
Brassica napus (Rape)moderately similar to ( 382) loc\_os04g55560 12004.m35488 protein AP2 domain containing  
protein, expressed seq=cds; coord=2:5514479..5518846:-1; parent\_gene=GRMZM2G174784'

'moderately similar to ( 220) AT1G33260 | Symbols: | protein kinase family protein | chr1:12064796-12066114  
FORWARDweakly similar to ( 144) CRI4\_MAIZE Putative receptor protein kinase CRINKLY4 precursor (EC  
2.7.11.1) - Zea mays (Maize)moderately similar to ( 433) loc\_os04g45730 12004.m09524 protein leucine-rich repeat  
receptor protein kinase EXS precursor, putative, expressed seq=cds; coord=2:21820830..21822340:1;  
parent\_gene=GRMZM2G168917'

'weakly similar to ( 170) AT4G00180 | Symbols: YAB3 | YAB3 (YABBY3); protein binding / transcription factor |  
chr4:72804-74888 REVERSEweakly similar to ( 109) YABDL\_ORYSA Protein DROOPING LEAF - Oryza sativa  
(Rice)moderately similar to ( 262) loc\_os04g45330 12004.m09486 protein yabby14 protein, putative, expressed  
seq=cds; coord=2:22756026..22758020:1; parent\_gene=GRMZM2G054795'

'very weakly similar to ( 100) AT2G34730 | Symbols: | myosin heavy chain-related | chr2:14654611-14657443  
FORWARDhighly similar to ( 625) loc\_os04g44090 12004.m09367 protein expressed protein seq=cds;  
coord=2:27827322..27833556:-1; parent\_gene=GRMZM2G387389'

'moderately similar to ( 395) AT1G04020 | Symbols: ATBARD1, BARD1 | BARD1 (BREAST CANCER  
ASSOCIATED RING 1); DNA binding / transcription coactivator | chr1:1036610-1040045 FORWARDhighly similar  
to ( 882) loc\_os04g43300 12004.m09294 protein ATBRCA1, putative, expressed seq=cds;  
coord=2:28673566..28677785:-1; parent\_gene=GRMZM2G052688'

'moderately similar to ( 395) AT1G04020 | Symbols: ATBARD1, BARD1 | BARD1 (BREAST CANCER ASSOCIATED RING 1); DNA binding / transcription coactivator | chr1:1036610-1040045 FORWARDhighly similar to ( 882) loc\_os04g43300 12004.m09294 protein ATBRCA1, putative, expressed seq=cds; coord=2:28673566..28677785:-1; parent\_gene=GRMZM2G052688'

'highly similar to ( 593) AT4G14340 | Symbols: CKI1, CKL11 | CKI1 (CASEIN KINASE I); kinase/ protein serine/threonine kinase | chr4:8248532-8251668 REVERSEhighly similar to ( 702) loc\_os04g43490 12004.m101584 protein casein kinase I isoform delta-like, putative, expressed seq=cds; coord=2:28936197..28940916:-1; parent\_gene=GRMZM2G032694'

'highly similar to ( 593) AT4G14340 | Symbols: CKI1, CKL11 | CKI1 (CASEIN KINASE I); kinase/ protein serine/threonine kinase | chr4:8248532-8251668 REVERSEhighly similar to ( 702) loc\_os04g43490 12004.m101584 protein casein kinase I isoform delta-like, putative, expressed seq=cds; coord=2:28936197..28940916:-1; parent\_gene=GRMZM2G032694'

'highly similar to ( 593) AT4G14340 | Symbols: CKI1, CKL11 | CKI1 (CASEIN KINASE I); kinase/ protein serine/threonine kinase | chr4:8248532-8251668 REVERSEhighly similar to ( 702) loc\_os04g43490 12004.m101584 protein casein kinase I isoform delta-like, putative, expressed seq=cds; coord=2:28936197..28940916:-1; parent\_gene=GRMZM2G032694'

'very weakly similar to (84.7) AT4G13870 | Symbols: WRNEXO | WRNEXO (WERNER SYNDROME-LIKE EXONUCLEASE); 3'-5' exonuclease/ nucleic acid binding / protein binding | chr4:8023563-8025542 REVERSEweakly similar to ( 199) loc\_os04g03990 12004.m05706 protein Werner syndrome ATP-dependent helicase, putative, expressed seq=cds; coord=2:110653506..110662313:-1; parent\_gene=GRMZM2G053631'

'very weakly similar to (94.7) AT1G29450 | Symbols: | auxin-responsive protein, putative | chr1:10305981-10306406 REVERSEweakly similar to ( 187) loc\_os09g37500 12009.m06697 protein OsSAUR55 - Auxin-responsive SAUR gene family member, expressed seq=cds; coord=2:197093510..197094134:-1; parent\_gene=GRMZM2G156470'

'moderately similar to ( 462) AT4G23180 | Symbols: CRK10, RLK4 | CRK10 (CYSTEINE-RICH RLK10); ATP binding / kinase/ protein kinase/ protein serine/threonine kinase/ protein tyrosine kinase | chr4:12138171-12140780 FORWARDweakly similar to ( 191) NORK\_MEDTR Nodulation receptor kinase precursor (EC 2.7.11.1) (Does not make infections protein 2) (Symbiosis receptor-like kinase) (MtSYMRK) - Medicago truncatula (Barrel medic)highly similar to ( 716) loc\_os07g35370 12007.m07793 protein receptor-like protein kinase homolog RK20-1, putative, expressed seq=cds; coord=2:204080024..204082820:-1; parent\_gene=GRMZM2G087625'

'moderately similar to ( 251) AT2G12190 | Symbols: | cytochrome P450, putative | chr2:4891807-4893345 REVERSEweakly similar to ( 171) C77A3\_SOYBN Cytochrome P450 77A3 (EC 1.14.-.-) - Glycine max (Soybean)moderately similar to ( 472) loc\_os10g37100 12010.m06510 protein cytochrome P450 89A2, putative seq=cds; coord=2:206538776..206540427:-1; parent\_gene=GRMZM2G031909'

'moderately similar to ( 201) AT5G67590 | Symbols: FRO1 | FRO1 (FROSTBITE1); NADH dehydrogenase (ubiquinone) | chr5:26958073-26959356 FORWARDmoderately similar to ( 297) loc\_os07g39710 12007.m08213 protein NADH-ubiquinone oxidoreductase 18 kDa subunit, mitochondrial precursor, putative, expressed seq=cds; coord=2:208123671..208129714:1; parent\_gene=GRMZM2G105207'

'moderately similar to ( 201) AT5G67590 | Symbols: FRO1 | FRO1 (FROSTBITE1); NADH dehydrogenase (ubiquinone) | chr5:26958073-26959356 FORWARDmoderately similar to ( 297) loc\_os07g39710 12007.m08213 protein NADH-ubiquinone oxidoreductase 18 kDa subunit, mitochondrial precursor, putative, expressed seq=cds; coord=2:208123671..208129714:1; parent\_gene=GRMZM2G105207'

'very weakly similar to (95.1) loc\_os07g48680 12007.m09079 protein RING-H2 finger protein ATL4L, putative, expressed seq=cds; coord=2:217695075..217695623:1; parent\_gene=GRMZM2G402262'

'moderately similar to ( 254) AT2G37650 | Symbols: | scarecrow-like transcription factor 9 (SCL9) | chr2:15792623-15794779 FORWARDweakly similar to ( 112) CIGR2\_ORYSA Chitin-inducible gibberellin-responsive protein 2 - Oryza sativa (Rice)moderately similar to ( 374) loc\_os1lg47910 12011.m08588 protein chitin-inducible gibberellin-responsive protein 2, putative seq=cds; coord=2:218855880..218857695:-1; parent\_gene=GRMZM2G425366'

'moderately similar to ( 403) AT3G59010 | Symbols: | pectinesterase family protein | chr3:21803015-21805098 REVERSEmoderately similar to ( 367) PME2\_CITSI Pectinesterase-2 precursor (EC 3.1.1.11) (Pectin methylesterase) (PE) - Citrus sinensis (Sweet orange)highly similar to ( 653) loc\_os02g54190 12002.m10448 protein pectinesterase-2 precursor, putative, expressed seq=cds; coord=2:220142201..220144806:-1; parent\_gene=GRMZM2G158240'

'moderately similar to ( 342) AT5G24400 | Symbols: emb2024 | emb2024 (embryo defective 2024); 6-phosphogluconolactonase/ catalytic | chr5:8330532-8331784 REVERSEmoderately similar to ( 464) loc\_os09g35970 12009.m06548 protein 6-phosphogluconolactonase, putative, expressed seq=cds; coord=2:220832499..220836411:-1; parent\_gene=GRMZM2G148769'

'weakly similar to ( 103) loc\_os01g12090 12001.m07824 protein expressed protein seq=cds; coord=3:3027157..3028320:-1; parent\_gene=GRMZM2G026868'

'highly similar to ( 622) AT2G34500 | Symbols: CYP710A1 | CYP710A1 (cytochrome P450, family 710, subfamily A, polypeptide 1); C-22 sterol desaturase/ oxygen binding | chr2:14539712-14541199 REVERSEvery weakly similar to (99.4) C88A1\_MAIZE Cytochrome P450 88A1 (EC 1.14.-.-) (Dwarf3 protein) - Zea mays (Maize)highly similar to ( 881) loc\_os01g11340 12001.m07753 protein CYP710A1, putative, expressed seq=cds; coord=3:3830545..3832095:1; parent\_gene=AC233853.1\_FG003'

'highly similar to ( 521) AT5G46240 | Symbols: KAT1 | KAT1 (POTASSIUM CHANNEL IN ARABIDOPSIS THALIANA 1); cyclic nucleotide binding / inward rectifier potassium channel | chr5:18743652-18746561 REVERSEmoderately similar to ( 447) AKT1\_ORYSA Potassium channel AKT1 (OsAKT1) - Oryza sativa (Rice)highly similar to ( 691) loc\_os01g11250 12001.m07744 protein potassium channel KAT1, putative, expressed seq=cds; coord=3:3843589..3847158:1; parent\_gene=GRMZM2G093313'

'very weakly similar to ( 100) AT1G49950 | Symbols: TRB1, ATTRB1 | DNA-binding protein, putative | chr1:18494439-18496713 REVERSEweakly similar to ( 164) loc\_os12g41920 12012.m26974 protein single myb histone 6, putative, expressed seq=cds; coord=3:14469142..14473799:-1; parent\_gene=GRMZM2G163291'

'moderately similar to ( 280) AT5G02310 | Symbols: PRT6 | PRT6 (PROTEOLYSIS 6); ubiquitin-protein ligase | chr5:474279-482552 FORWARDhighly similar to ( 504) loc\_os01g05500 12001.m42863 protein zinc finger in N-recognin family protein, putative, expressed seq=cds; coord=3:17607856..17610988:-1; parent\_gene=GRMZM2G541193'

'moderately similar to ( 225) AT1G48000 | Symbols: MYB112, AtMYB112 | MYB112 (myb domain protein 112); DNA binding / transcription factor | chr1:17704269-17706377 REVERSEweakly similar to ( 154) MYBA2\_ORYSA Myb-related protein MYBAS2 - Oryza sativa (Rice)moderately similar to ( 297) loc\_os01g19330 12001.m08470 protein cpm7, putative, expressed seq=cds; coord=3:52308738..52309963:1; parent\_gene=GRMZM2G158700'

'highly similar to ( 853) AT1G72180 | Symbols: | leucine-rich repeat transmembrane protein kinase, putative | chr1:27164074-27167204 FORWARDmoderately similar to ( 416) RPK1\_IPONI Receptor-like protein kinase precursor (EC 2.7.11.1) - Ipomoea nil (Japanese morning glory) (Pharbitis nil)nearly identical (1417) loc\_os01g65650 12001.m12674 protein receptor-like protein kinase 5 precursor, putative, expressed seq=cds; coord=3:172374935..172378448:-1; parent\_gene=GRMZM2G167253'

'weakly similar to ( 126) loc\_os01g62584 12001.m12380 protein expressed protein seq=cds; coord=3:180570157..180570890:-1; parent\_gene=GRMZM2G013463'

'highly similar to ( 726) AT4G37550 | Symbols: | formamidase, putative / formamide amidohydrolase, putative | chr4:17643684-17645249 FORWARDhighly similar to ( 837) loc\_os01g55950 12001.m11751 protein acetamidase, putative, expressed seq=cds; coord=3:194348658..194355579:1; parent\_gene=GRMZM2G089944'

'very weakly similar to (90.5) AT2G27035 | Symbols: | plastocyanin-like domain-containing protein | chr2:11535670-11536251 FORWARDweakly similar to ( 111) loc\_os07g02200 12007.m04693 protein blue copper protein precursor, putative, expressed seq=cds; coord=3:194633422..194634335:1; parent\_gene=GRMZM2G128531'

'very weakly similar to (90.5) AT2G27035 | Symbols: | plastocyanin-like domain-containing protein | chr2:11535670-11536251 FORWARDweakly similar to ( 111) loc\_os07g02200 12007.m04693 protein blue copper protein precursor, putative, expressed seq=cds; coord=3:194633422..194634335:1; parent\_gene=GRMZM2G128531'

'weakly similar to ( 128) AT1G52240 | Symbols: ATROPGEF11, ROPGEF11 | ROPGEF11 (RHO GUANYL-NUCLEOTIDE EXCHANGE FACTOR 11); Rho guanyl-nucleotide exchange factor | chr1:19458844-19459235 REVERSEweakly similar to ( 146) loc\_os01g55510 12001.m11709 protein dynein light chain LC6, flagellar outer arm, putative, expressed seq=cds; coord=3:195397485..195398202:-1; parent\_gene=GRMZM2G016435'

'weakly similar to ( 128) AT1G52240 | Symbols: ATROPGEF11, ROPGEF11 | ROPGEF11 (RHO GUANYL-NUCLEOTIDE EXCHANGE FACTOR 11); Rho guanyl-nucleotide exchange factor | chr1:19458844-19459235 REVERSEweakly similar to ( 146) loc\_os01g55510 12001.m11709 protein dynein light chain LC6, flagellar outer arm, putative, expressed seq=cds; coord=3:195397485..195398202:-1; parent\_gene=GRMZM2G016435'

'highly similar to ( 617) AT1G62430 | Symbols: ATCDS1 | ATCDS1; phosphatidate cytidyltransferase | chr1:23106274-23108923 REVERSEhighly similar to ( 637) CDS1\_SOLTU Phosphatidate cytidyltransferase (EC 2.7.7.41) (CDP-diglyceride synthetase) (CDP-diglyceride pyrophosphorylase) (CDP-diacylglycerol synthase) (CDS) (CTP:phosphatidate cytidyltransferase) (CDP-DAG synthase) (CDP-DG synthetase) - Solahighly similar to ( 761) loc\_os01g55360 12001.m43197 protein phosphatidate cytidyltransferase, putative, expressed seq=cds; coord=3:195881870..195897637:1; parent\_gene=GRMZM2G452529'

'seq=cds; coord=4:24186613..24187104:-1; parent\_gene=AC213666.3\_FG003'

'highly similar to ( 512) loc\_os08g09740 12008.m05108 protein F-box domain containing protein, expressed seq=cds; coord=4:27021370..27024643:1; parent\_gene=GRMZM2G142043'

'moderately similar to ( 313) loc\_os08g36450 12008.m07634 protein expressed protein seq=cds; coord=4:55755200..55757308:1; parent\_gene=GRMZM2G423292'

'moderately similar to ( 264) AT1G26930 | Symbols: | kelch repeat-containing F-box family protein | chr1:9336211-9337476 REVERSEmoderately similar to ( 414) loc\_os11g38980 12011.m080036 protein kelch motif family protein, expressed seq=cds; coord=4:117410977..117414545:-1; parent\_gene=GRMZM2G423663'

'moderately similar to ( 317) AT3G16090 | Symbols: | zinc finger (C3HC4-type RING finger) family protein | chr3:5456513-5458694 FORWARDmoderately similar to ( 449) loc\_os06g19680 12006.m32051 protein protein binding protein, putative, expressed seq=cds; coord=4:189151150..189158507:-1; parent\_gene=GRMZM2G055643'

'weakly similar to ( 102) loc\_os11g05660 12011.m04763 protein F-box domain containing protein, expressed seq=cds; coord=4:189243822..189244974:-1; parent\_gene=GRMZM2G302499'

'moderately similar to ( 407) AT1G79650 | Symbols: RAD23 | RAD23; damaged DNA binding | chr1:29972406-29975132 REVERSEmoderately similar to ( 300) RAD23\_ORYSA Probable DNA repair protein RAD23 (OsRAD23) - Oryza sativa (Rice)highly similar to ( 522) loc\_os02g08300 12002.m06176 protein DNA repair protein RAD23-1, putative, expressed seq=cds; coord=4:234901650..234908817:1; parent\_gene=GRMZM2G143462'

'highly similar to ( 627) AT3G18040 | Symbols: MPK9 | MPK9 (MAP KINASE 9); MAP kinase | chr3:6175741-6178150 FORWARDhighly similar to ( 702) MPK13\_ORYSA Mitogen-activated protein kinase 13 (EC 2.7.11.24) (MAP kinase 13) (Benzothiadiazole-induced MAP kinase 2) (OsBIMK2) (MAP kinase 2) (OsMAPK2) - Oryza sativa (Rice)highly similar to ( 702) loc\_os02g04230 12002.m100091 protein OsMPK17-2 - putative MAPK based on amino acid sequence homology, expressed seq=cds; coord=4:239429006..239435447:-1; parent\_gene=GRMZM2G374088'

'nearly identical (1055) AT5G42020 | Symbols: BIP | BIP2; ATP binding | chr5:16807697-16810480 REVERSEnearly identical (1158) BIP3\_MAIZE Luminal-binding protein 3 precursor (BiP3) - Zea mays (Maize)nearly identical (1140) loc\_os02g02410 12002.m05590 protein luminal-binding protein 3 precursor, putative, expressed seq=cds; coord=4:240050091..240053865:1; parent\_gene=GRMZM2G415007'

'nearly identical (1055) AT5G42020 | Symbols: BIP | BIP2; ATP binding | chr5:16807697-16810480 REVERSEnearly identical (1158) BIP3\_MAIZE Luminal-binding protein 3 precursor (BiP3) - Zea mays (Maize)nearly identical (1140) loc\_os02g02410 12002.m05590 protein luminal-binding protein 3 precursor, putative, expressed seq=cds; coord=4:240050091..240053865:1; parent\_gene=GRMZM2G415007'

'highly similar to ( 739) AT1G20630 | Symbols: CAT1 | CAT1 (CATALASE 1); catalase | chr1:7146812-7149609 FORWARDhighly similar to ( 964) CATA3\_MAIZE Catalase isozyme 3 (EC 1.11.1.6) - Zea mays (Maize)highly similar to ( 859) loc\_os02g02400 12002.m77750 protein catalase isozyme A, putative, expressed seq=cds; coord=4:240105016..240107173:1; parent\_gene=GRMZM2G079348'

'highly similar to ( 507) AT1G12240 | Symbols: ATBETAFRUCT4, VAC-INV | ATBETAFRUCT4; beta-fructofuranosidase/ hydrolase, hydrolyzing O-glycosyl compounds | chr1:4153699-4157457 FORWARDhighly similar to ( 569) INV1\_MAIZE Beta-fructofuranosidase 1 precursor (EC 3.2.1.26) (Sucrose 1) (Invertase 1) - Zea mays (Maize)highly similar to ( 739) loc\_os02g01590 12002.m100068 protein beta-fructofuranosidase 1 precursor, putative, expressed seq=cds; coord=4:240446489..240449003:-1; parent\_gene=GRMZM2G463871'

'moderately similar to ( 448) AT5G58420 | Symbols: | 40S ribosomal protein S4 (RPS4D) | chr5:23619599-23620896 FORWARDmoderately similar to ( 481) RS4\_MAIZE 40S ribosomal protein S4 - Zea mays (Maize)moderately similar to ( 468) loc\_os02g01560 12002.m05506 protein 40S ribosomal protein S4, putative, expressed seq=cds; coord=5:1488844..1491571:1; parent\_gene=GRMZM2G125271'

'moderately similar to ( 448) AT5G58420 | Symbols: | 40S ribosomal protein S4 (RPS4D) | chr5:23619599-23620896 FORWARDmoderately similar to ( 481) RS4\_MAIZE 40S ribosomal protein S4 - Zea mays (Maize)moderately similar to ( 468) loc\_os02g01560 12002.m05506 protein 40S ribosomal protein S4, putative, expressed seq=cds; coord=5:1488844..1491571:1; parent\_gene=GRMZM2G125271'

'moderately similar to ( 233) AT4G16070 | Symbols: | lipase class 3 family protein | chr4:9096808-9100596 REVERSEhighly similar to ( 515) loc\_os03g61540 12003.m35500 protein triacylglycerol lipase, putative, expressed seq=cds; coord=5:1722294..1727548:1; parent\_gene=GRMZM2G023049'

'highly similar to ( 557) AT2G47070 | Symbols: SPL1 | SPL1 (SQUAMOSA PROMOTER BINDING PROTEIN-LIKE 1); DNA binding / transcription factor | chr2:19337144-19340552 FORWARDvery weakly similar to (97.8) LG1\_MAIZE LIGULELESS1 protein - Zea mays (Maize)nearly identical (1281) loc\_os03g61760 12003.m11057 protein squamosa promoter-binding-like protein 12, putative, expressed seq=cds; coord=5:1845813..1852802:-1; parent\_gene=GRMZM2G138421'

'moderately similar to ( 248) loc\_os12g24080 12012.m06242 protein UPL2, putative, expressed seq=cds; coord=5:20984676..20990310:1; parent\_gene=GRMZM2G024054'

'moderately similar to ( 235) AT5G39790 | Symbols: | 5'-AMP-activated protein kinase beta-1 subunit-related | chr5:15932884-15935121 REVERSEmoderately similar to ( 387) loc\_os02g04330 12002.m100032 protein expressed protein seq=cds; coord=5:76677057..76682688:1; parent\_gene=GRMZM2G042245'



'moderately similar to ( 426) AT3G15890 | Symbols: | protein kinase family protein | chr3:5374389-5376114 FORWARDmoderately similar to ( 231) NORK\_MEDTR Nodulation receptor kinase precursor (EC 2.7.11.1) (Does not make infections protein 2) (Symbiosis receptor-like kinase) (MtSYMRK) - Medicago truncatula (Barrel medic)highly similar to ( 636) loc\_os02g09359 12002.m06232 protein BRASSINOSTEROID INSENSITIVE 1-associated receptor kinase 1 precursor, putative, expressed seq=cds; coord=5:96751789..96755232:1; parent\_gene=GRMZM2G118939'

'highly similar to ( 680) AT2G30980 | Symbols: ASKdZeta, ATSK23, BIL1, ATSK2-2 | ASKdZeta (Arabidopsis SHAGGY-related protein kinase dZeta); ATP binding / kinase/ protein kinase/ protein serine/threonine kinase | chr2:13182350-13185870 REVERSEhighly similar to ( 608) MSK1\_TOBAC Shaggy-related protein kinase NtK-1 (EC 2.7.11.1) - Nicotiana tabacum (Common tobacco)highly similar to ( 721) loc\_os02g14130 12002.m06659 protein shaggy-related protein kinase eta, putative, expressed seq=cds; coord=5:145863905..145869773:1; parent\_gene=GRMZM2G151916'

'moderately similar to ( 299) AT3G10130 | Symbols: | SOUL heme-binding family protein | chr3:3131122-3133158 REVERSEmoderately similar to ( 405) loc\_os02g33020 12002.m08395 protein SOUL heme-binding protein, putative, expressed seq=cds; coord=5:169224236..169226800:1; parent\_gene=GRMZM2G074040'

'moderately similar to ( 437) AT1G35620 | Symbols: ATPDIL5-2, ATPD18, PDI8 | ATPDIL5-2 (PDI-LIKE 5-2); protein disulfide isomerase | chr1:13156504-13158280 FORWARDweakly similar to ( 113) PDI\_MEDSA Protein disulfide-isomerase precursor (EC 5.3.4.1) (PDI) - Medicago sativa (Alfalfa)highly similar to ( 631) loc\_os02g34530 12002.m08542 protein OsPDIL5-3 - Oryza sativa protein disulfide isomerase, expressed seq=cds; coord=5:171878652..171881421:-1; parent\_gene=GRMZM2G007385'

'weakly similar to ( 108) AT1G47230 | Symbols: CYCA3;4 | cyclin, putative | chr1:17306752-17308587 FORWARDweakly similar to ( 101) CCNAL\_DAUCA G2/mitotic-specific cyclin C13-1 (A-like cyclin) (Fragment) - Daucus carota (Carrot)weakly similar to ( 173) loc\_os02g39420 12002.m09030 protein cyclin-A1, putative seq=cds; coord=5:174890976..174891830:-1; parent\_gene=AC212449.4\_FG004'

'moderately similar to ( 406) AT1G22400 | Symbols: UGT85A1, ATUGT85A1 | UGT85A1; UDP-glycosyltransferase/ cis-zeatin O-beta-D-glucosyltransferase/ glucuronosyltransferase/ trans-zeatin O-beta-D-glucosyltransferase/ transferase, transferring glycosyl groups / transferase, transferring hexosyl groups | chr1:7903851-7906607 REVERSEweakly similar to ( 164) UFO3\_MAIZE Anthocyanidin 3-O-glucosyltransferase (EC 2.4.1.115) (Flavonol 3-O-glucosyltransferase) (UDP-glucose flavonoid 3-O-glucosyltransferase) (Bronze-1) (Bz-W22 allele) - Zea mays (Maize)moderately similar to ( 483) loc\_os06g11720 12006.m05889 protein cytokinin-O-glucosyltransferase 2, putative, expressed seq=cds; coord=5:175587788..175589630:-1; parent\_gene=GRMZM2G049798'

'moderately similar to ( 292) AT3G51390 | Symbols: | zinc finger (DHHC type) family protein | chr3:19075718-19077966 FORWARDmoderately similar to ( 484) loc\_os12g29560 12012.m06770 protein metal ion binding protein, putative, expressed seq=cds; coord=5:193912373..193917165:1; parent\_gene=GRMZM2G141503'

'weakly similar to ( 120) AT5G51990 | Symbols: CBF4, DREB1D | CBF4 (C- REPEAT-BINDING FACTOR 4); DNA binding / transcription activator/ transcription factor | chr5:21117113-21117787 REVERSEmoderately similar to ( 233) loc\_os02g45450 12002.m09582 protein dehydration-responsive element-binding protein 1A, putative, expressed seq=cds; coord=5:195834102..195835230:1; parent\_gene=GRMZM2G137341'

'very weakly similar to (97.8) AT5G16000 | Symbols: NIK1 | NIK1 (NSP-INTERACTING KINASE 1); kinase | chr5:5224264-5227003 FORWARDweakly similar to ( 118) loc\_os02g49600 12002.m09994 protein BRASSINOSTEROID INSENSITIVE 1-associated receptor kinase 1 precursor, putative, expressed seq=cds; coord=5:204589912..204594285:-1; parent\_gene=GRMZM2G019317'

'highly similar to ( 580) AT2G01830 | Symbols: WOL, CRE1, WOL1, AHK4, ATCRE1 | WOL (WOODEN LEG); cytokinin receptor/ osmosensor/ phosphoprotein phosphatase/ protein histidine kinase | chr2:363332-367429 REVERSEvery weakly similar to (92.4) ETR1\_BRAOL Ethylene receptor (EC 2.7.13.3) - Brassica oleracea (Wild cabbage)highly similar to ( 800) loc\_os02g50480 12002.m10082 protein histidine kinase 1, putative, expressed seq=cds; coord=5:205544166..205551400:1; parent\_gene=GRMZM2G151223'

'moderately similar to ( 248) AT5G40250 | Symbols: | zinc finger (C3HC4-type RING finger) family protein | chr5:16086056-16087186 FORWARDmoderately similar to ( 472) loc\_os02g50930 12002.m10127 protein RING-H2 finger protein ATLSI, putative, expressed seq=cds; coord=5:206555179..206557068:1; parent\_gene=GRMZM2G053303'

'weakly similar to ( 147) AT5G65220 | Symbols: | ribosomal protein L29 family protein | chr5:26061301-26062506 FORWARDmoderately similar to ( 228) RK29\_MAIZE 50S ribosomal protein L29, chloroplast precursor (CL29) - Zea mays (Maize)weakly similar to ( 199) loc\_os02g51790 12002.m10210 protein 50S ribosomal protein L29, chloroplast precursor, putative, expressed seq=cds; coord=5:208341565..208343539:1; parent\_gene=GRMZM2G159554'

'moderately similar to ( 377) AT3G53620 | Symbols: AtPPa4 | AtPPa4 (Arabidopsis thaliana pyrophosphorylase 4); inorganic diphosphatase | chr3:19881491-19883308 FORWARDmoderately similar to ( 355) IPYR\_ORYSA Soluble inorganic pyrophosphatase (EC 3.6.1.1) (Pyrophosphate phospho-hydrolase) (PPase) - Oryza sativa (Rice)moderately similar to ( 411) loc\_os05g02310 12005.m04767 protein soluble inorganic pyrophosphatase, putative, expressed seq=cds; coord=6:35680626..35684863:1; parent\_gene=GRMZM2G137930'

'highly similar to ( 669) AT1G70710 | Symbols: ATGH9B1, CEL1 | ATGH9B1 (ARABIDOPSIS THALIANA GLYCOSYL HYDROLASE 9B1); cellulase/ hydrolase, hydrolyzing O-glycosyl compounds | chr1:26659356-26662962 REVERSEhighly similar to ( 804) GUN17\_ORYSA Endoglucanase 17 precursor (EC 3.2.1.4) (Endo-1,4-beta glucanase 17) (OsGLU13) - Oryza sativa (Rice)highly similar to ( 804) loc\_os06g14540 12006.m06169 protein endoglucanase 1 precursor, putative, expressed seq=cds; coord=6:118083995..118087966:1; parent\_gene=GRMZM2G455642'

'weakly similar to ( 151) AT5G08120 | Symbols: MBP2C, ATMBP2C | MBP2C (MICROTUBULE BINDING PROTEIN 2C); protein binding | chr5:2600743-2602678 REVERSEmoderately similar to ( 392) loc\_os06g17440 12006.m06456 protein TMV-MP30 binding protein 2C, putative, expressed seq=cds; coord=6:119162488..119165785:1; parent\_gene=GRMZM2G018823'

'nearly identical (1219) AT2G41560 | Symbols: ACA4 | ACA4 (AUTO-INHIBITED CA(2

'very weakly similar to ( 86.7) AT1G75250 | Symbols: ATRL6 | ATRL6 (ARABIDOPSIS RAD-LIKE 6); transcription factor | chr1:28244463-28245453 REVERSEweakly similar to ( 126) loc\_os05g50350 12005.m09104 protein DNA binding protein, putative seq=cds; coord=6:166238069..166238595:-1; parent\_gene=GRMZM2G139174'

'moderately similar to ( 457) AT1G17050 | Symbols: SPS2 | SPS2 (Solanesyl diphosphate synthase 2); trans-octaprenyltranstransferase | chr1:5829289-5831215 FORWARDweakly similar to ( 118) GGPPS\_CAPAN Geranylgeranyl pyrophosphate synthetase, chloroplast precursor (GGPP synthetase) (GGPS) [Includes: Dimethylallyltranstransferase (EC 2.5.1.1); Geranyltranstransferase (EC 2.5.1.10); Farnesyltranstransferase (EC 2.5.1.29)] - Capsicum anhighly similar to ( 562) loc\_os05g50550 12005.m09124 protein prenyl transferase, putative, expressed seq=cds; coord=6:166823882..166829182:-1; parent\_gene=GRMZM2G163809'

'moderately similar to ( 359) AT3G57490 | Symbols: | 40S ribosomal protein S2 (RPS2D) | chr3:21279824-21280887 REVERSEmoderately similar to ( 409) loc\_os03g59310 12003.m10829 protein 40S ribosomal protein S2, putative, expressed seq=cds; coord=7:18473070..18475522:1; parent\_gene=GRMZM2G168149'

'highly similar to ( 560) AT1G73100 | Symbols: SUVH3, SDG19 | SUVH3 (SU(VAR)3-9 HOMOLOG 3); histone methyltransferase | chr1:27491970-27493979 FORWARDnearly identical (1170) loc\_os11g38900 12011.m07738 protein histone-lysine N-methyltransferase, H3 lysine-9 specific SUVH1, putative, expressed seq=cds; coord=7:20244021..20246591:1; parent\_gene=AC233961.1\_FG001'

'highly similar to ( 560) AT1G73100 | Symbols: SUVH3, SDG19 | SUVH3 (SU(VAR)3-9 HOMOLOG 3); histone methyltransferase | chr1:27491970-27493979 FORWARDnearly identical (1170) loc\_os11g38900 12011.m07738 protein histone-lysine N-methyltransferase, H3 lysine-9 specific SUVH1, putative, expressed seq=cds; coord=7:20244021..20246591:1; parent\_gene=AC233961.1\_FG001'

'moderately similar to ( 355) AT3G11900 | Symbols: ANT1 | ANT1 (AROMATIC AND NEUTRAL TRANSPORTER 1); amino acid transmembrane transporter/ aromatic amino acid transmembrane transporter/ neutral amino acid transmembrane transporter | chr3:3758523-3760103 FORWARDhighly similar to ( 568) loc\_os07g12770 12007.m05729 protein ANT1, putative, expressed seq=cds; coord=7:21546705..21550608:-1; parent\_gene=GRMZM2G173967'

'moderately similar to ( 295) AT3G20830 | Symbols: | protein kinase family protein | chr3:7285024-7286250 REVERSEweakly similar to ( 128) G11A\_ORYSA Protein kinase G11A (EC 2.7.11.1) - Oryza sativa (Rice)moderately similar to ( 491) loc\_os08g39460 12008.m07927 protein protein kinase, putative, expressed seq=cds; coord=7:23598889..23600662:1; parent\_gene=GRMZM2G050427'

'weakly similar to ( 182) AT1G72030 | Symbols: | GCN5-related N-acetyltransferase (GNAT) family protein | chr1:27110887-27111825 FORWARDmoderately similar to ( 317) loc\_os07g16130 12007.m06056 protein histone acetyltransferase HPA2 and related acetyltransferases, putative, expressed seq=cds; coord=7:27679736..27681630:-1; parent\_gene=GRMZM2G302778'

'moderately similar to ( 452) AT1G09795 | Symbols: ATATP-PRT2, HSN1B | ATATP-PRT2 (ATP PHOSPHORIBOSYL TRANSFERASE 2); ATP phosphoribosyltransferase | chr1:3173588-3176690 FORWARDhighly similar to ( 565) loc\_os03g04169 12003.m05948 protein ATP phosphoribosyltransferase, putative, expressed seq=cds; coord=7:132157014..132162257:1; parent\_gene=GRMZM2G068862'

'highly similar to ( 949) AT1G15690 | Symbols: AVP1, ATAVP3, AVP-3 | AVP1; ATPase/ hydrogen-translocating pyrophosphatase | chr1:5399115-5402185 FORWARDhighly similar to ( 949) AVP\_PHAU Pyrophosphate-energized vacuolar membrane proton pump (EC 3.6.1.1) (Pyrophosphate-energized inorganic pyrophosphatase) (H

'moderately similar to ( 473) AT5G54270 | Symbols: LHCB3, LHCB3\*1 | LHCB3 (LIGHT-HARVESTING CHLOROPHYLL B-BINDING PROTEIN 3); structural molecule | chr5:22038424-22039383 FORWARDhighly similar to ( 504) CB23\_HORVU Chlorophyll a-b binding protein of LHCII type III, chloroplast precursor (CAB) - Hordeum vulgare (Barley)moderately similar to ( 494) loc\_os07g37550 12007.m079717 protein chlorophyll a-b binding protein of LHCII type III, chloroplast precursor, putative, expressed seq=cds; coord=7:157568903..157570895:1; parent\_gene=GRMZM2G057281'

'nearly identical (2229) AT3G43300 | Symbols: ATMIN7 | ATMIN7 (ARABIDOPSIS THALIANA HOPM INTERACTOR 7); guanyl-nucleotide exchange factor/ protein binding | chr3:15234235-15245034 REVERSEnearly identical (2746) loc\_os07g37750 12007.m08025 protein guanyl-nucleotide exchange factor, putative, expressed seq=cds; coord=7:157907062..157937456:-1; parent\_gene=GRMZM2G335287'

'moderately similar to ( 312) AT5G05340 | Symbols: | peroxidase, putative | chr5:1579142-1580819 REVERSEmoderately similar to ( 340) PER2\_ORYSA Peroxidase 2 precursor (EC 1.11.1.7) - Oryza sativa (Rice)moderately similar to ( 340) loc\_os07g48030 12007.m09018 protein peroxidase 2 precursor, putative, expressed seq=cds; coord=7:172779032..172780863:1; parent\_gene=GRMZM2G126261'

'moderately similar to ( 290) AT2G45570 | Symbols: CYP76C2 | CYP76C2; electron carrier/ heme binding / iron ion binding / monooxygenase/ oxygen binding | chr2:18779935-18781922 REVERSEmoderately similar to ( 233) C76A2\_SOLME Cytochrome P450 76A2 (EC 1.14.-.-) (CYPLXXVIA2) (P-450EG7) - Solanum melongena (Eggplant) (Aubergine)moderately similar to ( 349) loc\_os09g27510 12009.m05902 protein cytochrome P450 76C4, putative, expressed seq=cds; coord=7:173961868..173963500:-1; parent\_gene=GRMZM2G425127'

'moderately similar to ( 311) AT3G20770 | Symbols: EIN3 | EIN3 (ETHYLENE-INSENSITIVE3); transcription factor chr3:7260702-7262588 REVERSEmoderately similar to ( 433) loc\_os07g48630 12007.m29024 protein ETHYLENE-INSENSITIVE3-like 1 protein, putative, expressed seq=cds; coord=7:173951359..173953387:-1; parent\_gene=GRMZM2G151811'

'weakly similar to ( 171) AT4G35160 | Symbols: | O-methyltransferase family 2 protein | chr4:16730989-16732808 REVERSEmoderately similar to ( 452) ZRP4\_MAIZE O-methyltransferase ZRP4 (EC 2.1.1.-) (OMT) - Zea mays (Maize)moderately similar to ( 416) loc\_os12g25450 12012.m06370 protein O-methyltransferase ZRP4, putative, expressed seq=cds; coord=8:123041911..123044071:1; parent\_gene=AC209819.3\_FG005'

'moderately similar to ( 382) AT1G78680 | Symbols: ATGGH2 | ATGGH2 (gamma-glutamyl hydrolase 2); omega peptidase | chr1:29593933-29596037 FORWARDmoderately similar to ( 322) GGH\_SOYBN Gamma-glutamyl hydrolase precursor (EC 3.4.19.9) (Gamma-Glu-X carboxypeptidase) (Conjugase) (GH) - Glycine max (Soybean)highly similar to ( 513) loc\_os05g44130 12005.m27626 protein gamma-glutamyl hydrolase precursor, putative, expressed seq=cds; coord=8:123149285..123153566:-1; parent\_gene=GRMZM2G095955'

'moderately similar to ( 407) AT5G40850 | Symbols: UPM1 | UPM1 (UROPHORPHYRIN METHYLASE 1); uroporphyrin-III C-methyltransferase | chr5:16367205-16368724 FORWARDmoderately similar to ( 281) loc\_os01g44050 12001.m10664 protein siroheme synthase, putative, expressed seq=cds; coord=8:145905785..145909658:1; parent\_gene=GRMZM2G000739'

'weakly similar to ( 152) AT4G10040 | Symbols: CYTC-2 | CYTC-2 (cytochrome c-2); electron carrier/ heme binding / iron ion binding | chr4:6277083-6278281 FORWARDweakly similar to ( 157) CYC\_PHAAU Cytochrome c - Phaseolus aureus (Mung bean) (Vigna radiata)weakly similar to ( 157) loc\_os05g34770 12005.m27830 protein cytochrome c, putative, expressed seq=cds; coord=8:146114091..146116986:1; parent\_gene=GRMZM2G013712'

'highly similar to ( 697) AT3G18040 | Symbols: MPK9 | MPK9 (MAP KINASE 9); MAP kinase | chr3:6175741-6178150 FORWARDhighly similar to ( 808) MPK16\_ORYSA Mitogen-activated protein kinase 16 (EC 2.7.11.24) (MAP kinase 16) - Oryza sativa (Rice)highly similar to ( 808) loc\_os01g45620 12001.m43112 protein OsMPK21-2 - putative MAPK based on amino acid sequence homology, expressed seq=cds; coord=8:146830973..146836666:-1; parent\_gene=GRMZM2G375975'

'weakly similar to ( 152) AT3G12700 | Symbols: | aspartyl protease family protein | chr3:4037136-4038387 FORWARDmoderately similar to ( 280) loc\_os01g48750 12001.m11064 protein aspartic proteinase nepenthesin-2 precursor, putative, expressed seq=cds; coord=8:150906867..150909121:1; parent\_gene=GRMZM2G311680'

'highly similar to ( 770) AT3G18660 | Symbols: PGSIP1 | PGSIP1 (PLANT GLYCOGENIN-LIKE STARCH INITIATION PROTEIN 1); transferase, transferring glycosyl groups | chr3:6419211-6421959 REVERSEnearly identical (1139) loc\_os01g65780 12001.m150444 protein secondary cell wall-related glycosyltransferase family 8, putative, expressed seq=cds; coord=8:165234282..165239619:-1; parent\_gene=GRMZM2G002023'

'moderately similar to ( 265) AT3G57030 | Symbols: | strictosidine synthase family protein | chr3:21101653-21103204 REVERSEweakly similar to ( 153) STSY\_CATRO Strictosidine synthase precursor (EC 4.3.3.2) - Catharanthus roseus (Rosy periwinkle) (Madagascar periwinkle)moderately similar to ( 497) loc\_os08g07810 12008.m04918 protein strictosidine synthase 1 precursor, putative seq=cds; coord=8:165827475..165828933:-1; parent\_gene=GRMZM2G338431'

'moderately similar to ( 265) AT3G57030 | Symbols: | strictosidine synthase family protein | chr3:21101653-21103204 REVERSEweakly similar to ( 153) STSY\_CATRO Strictosidine synthase precursor (EC 4.3.3.2) - Catharanthus roseus (Rosy periwinkle) (Madagascar periwinkle)moderately similar to ( 497) loc\_os08g07810 12008.m04918 protein strictosidine synthase 1 precursor, putative seq=cds; coord=8:165827475..165828933:-1; parent\_gene=GRMZM2G338431'

'moderately similar to ( 315) AT4G28190 | Symbols: ULT1, ULT | ULT1 (ULTRAPETALA1); DNA binding | chr4:13985753-13987050 FORWARDmoderately similar to ( 379) loc\_os01g57240 12001.m11877 protein expressed protein seq=cds; coord=8:172005510..172009034:1; parent\_gene=GRMZM2G004690'

'moderately similar to ( 386) AT4G11530 | Symbols: | kinase | chr4:6987093-6989599 FORWARDweakly similar to ( 181) PSKR\_DAUCA Phytosulfokine receptor precursor (EC 2.7.11.1) (Phytosulfokine LRR receptor kinase) - Daucus carota (Carrot)moderately similar to ( 426) loc\_os05g41370 12005.m08312 protein receptor-like protein kinase homolog RK20-1, putative, expressed seq=cds; coord=8:172251862..172254705:-1; parent\_gene=GRMZM2G434363'

'moderately similar to ( 280) AT4G33460 | Symbols: ATNAP13, EMB2751 | ATNAP13; transporter | chr4:16098325-16100113 REVERSEvery weakly similar to (80.1) CYSA\_MESVI Probable sulfate/thiosulfate import ATP-binding protein cysA (EC 3.6.3.25) (Sulfate-transporting ATPase) - Mesostigma viridemoderately similar to ( 377) loc\_os01g56400 12001.m11796 protein cobalt import ATP-binding protein cbiO 2, putative, expressed seq=cds; coord=8:172455200..172464190:-1; parent\_gene=GRMZM2G111511'

'moderately similar to ( 280) AT4G33460 | Symbols: ATNAP13, EMB2751 | ATNAP13; transporter | chr4:16098325-16100113 REVERSEvery weakly similar to (80.1) CYSA\_MESVI Probable sulfate/thiosulfate import ATP-binding protein cysA (EC 3.6.3.25) (Sulfate-transporting ATPase) - Mesostigma viridemoderately similar to ( 377) loc\_os01g56400 12001.m11796 protein cobalt import ATP-binding protein cbiO 2, putative, expressed seq=cds; coord=8:172455200..172464190:-1; parent\_gene=GRMZM2G111511'

'weakly similar to ( 109) AT1G28210 | Symbols: ATJ1 | ATJ1; heat shock protein binding / nucleic acid binding / unfolded protein binding / zinc ion binding | chr1:9854598-9859977 FORWARDweakly similar to ( 149) loc\_os06g11440 12006.m32015 protein transposon protein, putative, Mutator sub-class, expressed seq=cds; coord=9:6826102..6839564:-1; parent\_gene=GRMZM2G097620'

'nearly identical (1504) AT5G65460 | Symbols: | kinesin motor protein-related | chr5:26161831-26169001 REVERSEweakly similar to ( 138) FLA10\_CHLRE Kinesin-like protein FLA10 (Protein KHP1) - Chlamydomonas reinhardtiihighly similar to ( 894) loc\_os06g11380 12006.m05855 protein ATP binding protein, putative, expressed seq=cds; coord=9:7186959..7210629:-1; parent\_gene=GRMZM2G017257'

'nearly identical (1504) AT5G65460 | Symbols: | kinesin motor protein-related | chr5:26161831-26169001 REVERSEweakly similar to ( 138) FLA10\_CHLRE Kinesin-like protein FLA10 (Protein KHP1) - Chlamydomonas reinhardtiihighly similar to ( 894) loc\_os06g11380 12006.m05855 protein ATP binding protein, putative, expressed seq=cds; coord=9:7186959..7210629:-1; parent\_gene=GRMZM2G017257'

'moderately similar to ( 367) AT2G36800 | Symbols: DOGT1, UGT73C5 | DOGT1 (DON-GLUCOSYLTRANSFERASE 1); UDP-glycosyltransferase/ cis-zeatin O-beta-D-glucosyltransferase/ glucosyltransferase/ quercetin 4'-O-glucosyltransferase/ quercetin 7-O-glucosyltransferase/ trans-zeatin O-beta-D-glucosyltransferase/ transferase, transf | chr2:15423493-15424980 REVERSEweakly similar to ( 155) ZOX\_PHAVU Zeatin O-xylosyltransferase (EC 2.4.2.40) (Zeatin O-beta-D-xylosyltransferase) - Phaseolus vulgaris (Kidney bean) (French bean)highly similar to ( 668) loc\_os03g24430 12003.m07789 protein cytokinin-O-glucosyltransferase 3, putative seq=cds; coord=9:8354433..8356134:-1; parent\_gene=GRMZM2G403740'

'nearly identical (1585) AT1G07670 | Symbols: ATECA4, ECA4 | calcium-transporting ATPase | chr1:2370305-2374196 REVERSEmoderately similar to ( 327) ACA5\_ORYSA Probable calcium-transporting ATPase 5, plasma membrane-type (EC 3.6.3.8) (Ca2

'nearly identical (1585) AT1G07670 | Symbols: ATECA4, ECA4 | calcium-transporting ATPase | chr1:2370305-2374196 REVERSEmoderately similar to ( 327) ACA5\_ORYSA Probable calcium-transporting ATPase 5, plasma membrane-type (EC 3.6.3.8) (Ca2

'moderately similar to ( 291) AT3G03470 | Symbols: CYP89A9 | CYP89A9; electron carrier/ heme binding / iron ion binding / monooxygenase/ oxygen binding | chr3:824692-826345 REVERSEmoderately similar to ( 224) C77A3\_SOYBN Cytochrome P450 77A3 (EC 1.14.-.-) - Glycine max (Soybean)moderately similar to ( 412) loc\_os10g05020 12010.m03909 protein transposon protein, putative, unclassified, expressed seq=cds; coord=10:717278..719105:-1; parent\_gene=GRMZM2G179143'

'moderately similar to ( 323) AT5G04740 | Symbols: | ACT domain-containing protein | chr5:1368713-1371391 REVERSEmoderately similar to ( 415) loc\_os12g05650 12012.m04558 protein ACT domain containing protein, expressed seq=cds; coord=10:5523751..5529199:-1; parent\_gene=GRMZM2G066496'

'moderately similar to ( 456) AT5G65940 | Symbols: CHY1 | CHY1 (BETA-HYDROXYISOBUTYRYL-COA HYDROLASE 1); 3-hydroxyisobutyryl-CoA hydrolase | chr5:26376927-26379161 REVERSEhighly similar to ( 552) loc\_os12g16350 12012.m073804 protein CHY1, putative, expressed seq=cds; coord=10:19475272..19481312:1; parent\_gene=GRMZM2G181227'

'moderately similar to ( 233) AT5G57580 | Symbols: | calmodulin-binding protein | chr5:23314994-23317683 REVERSEhighly similar to ( 692) loc\_os12g36110 12012.m07401 protein calmodulin binding protein, putative, expressed seq=cds; coord=10:23804445..23808523:-1; parent\_gene=GRMZM2G176472'

'weakly similar to ( 117) AT1G54580 | Symbols: ACP2 | ACP2 (ACYL CARRIER PROTEIN 2); acyl carrier | chr1:20389572-20390770 FORWARDweakly similar to ( 186) ACP1\_HORVU Acyl carrier protein 1, chloroplast precursor (Acyl carrier protein I) (ACP I) - Hordeum vulgare (Barley)weakly similar to ( 197) loc\_os12g34890 12012.m07282 protein acyl carrier protein 1, chloroplast precursor, putative, expressed seq=cds; coord=10:25773815..25777130:1; parent\_gene=GRMZM2G149580'

'moderately similar to ( 208) AT5G38280 | Symbols: PR5K | PR5K; kinase/ transmembrane receptor protein serine/threonine kinase | chr5:15293325-15295838 REVERSEweakly similar to ( 146) KPRO\_MAIZE Putative receptor protein kinase ZmPK1 precursor (EC 2.7.11.1) - Zea mays (Maize)moderately similar to ( 417) loc\_os11g25510 12011.m06473 protein S-domain receptor-like protein kinase, putative, expressed seq=cds; coord=10:66956269..66957720:1; parent\_gene=GRMZM2G481531'

'moderately similar to ( 408) AT3G27550 | Symbols: | group II intron splicing factor CRS1-related | chr3:10208010-10209899 REVERSEhighly similar to ( 602) loc\_os05g05300 12005.m05057 protein CRS1 / YhbY domain containing protein, expressed seq=cds; coord=10:89435091..89438493:1; parent\_gene=GRMZM2G039857'

'moderately similar to ( 430) AT1G20925 | Symbols: | auxin efflux carrier family protein | chr1:7290612-7292507 FORWARDhighly similar to ( 618) loc\_os09g31478 12009.m06269 protein auxin hydrogen symporter, putative, expressed seq=cds; coord=10:128451470..128455073:1; parent\_gene=GRMZM2G007481'

'weakly similar to ( 151) AT1G04790 | Symbols: | zinc finger (C3HC4-type RING finger) family protein | chr1:1345469-1348143 FORWARDmoderately similar to ( 343) loc\_os04g43220 12004.m35172 protein zinc finger, C3HC4 type family protein, expressed seq=cds; coord=10:130228571..130231882:-1; parent\_gene=GRMZM2G016487'

'weakly similar to ( 137) AT5G10650 | Symbols: | zinc finger (C3HC4-type RING finger) family protein | chr5:3365237-3367263 REVERSEmoderately similar to ( 459) loc\_os04g51400 12004.m35451 protein zinc finger, C3HC4 type family protein, expressed seq=cds; coord=10:141076436..141079773:1; parent\_gene=GRMZM2G140924'

'highly similar to ( 744) AT3G22200 | Symbols: POP2, GABA-T, HER1 | POP2 (POLLEN-PISTIL INCOMPATIBILITY 2); 4-aminobutyrate transaminase/ 4-aminobutyrate:pyruvate transaminase | chr3:7835286-7838863 FORWARDvery weakly similar to (89.7) GSA\_BRANA Glutamate-1-semialdehyde 2,1-aminomutase, chloroplast precursor (EC 5.4.3.8) (GSA) (Glutamate-1-semialdehyde aminotransferase) (GSA-AT) - Brassica napus (Rape)highly similar to ( 899) loc\_os04g52450 12004.m101652 protein aminotransferase y4uB, putative, expressed seq=cds; coord=10:142279983..142291898:1; parent\_gene=GRMZM2G108125'

'highly similar to ( 744) AT3G22200 | Symbols: POP2, GABA-T, HER1 | POP2 (POLLEN-PISTIL INCOMPATIBILITY 2); 4-aminobutyrate transaminase/ 4-aminobutyrate:pyruvate transaminase | chr3:7835286-7838863 FORWARDvery weakly similar to (89.7) GSA\_BRANA Glutamate-1-semialdehyde 2,1-aminomutase, chloroplast precursor (EC 5.4.3.8) (GSA) (Glutamate-1-semialdehyde aminotransferase) (GSA-AT) - Brassica napus (Rape)highly similar to ( 899) loc\_os04g52450 12004.m101652 protein aminotransferase y4uB, putative, expressed seq=cds; coord=10:142279983..142291898:1; parent\_gene=GRMZM2G108125'

'weakly similar to ( 169) AT4G36920 | Symbols: AP2, FLO2, FL1 | AP2 (APETALA 2); transcription factor | chr4:17400998-17403140 FORWARDvery weakly similar to (80.9) BBM2\_BRANA Protein BABY BOOM 2 (BnBBM2) - Brassica napus (Rape)moderately similar to ( 218) loc\_os04g55560 12004.m35488 protein AP2 domain containing protein, expressed seq=cds; coord=10:145350317..145352828:1; parent\_gene=GRMZM2G076602'

'moderately similar to ( 261) AT4G32300 | Symbols: SD2-5 | SD2-5 (S-DOMAIN-2 5); carbohydrate binding / kinase/ protein kinase | chr4:15599970-15602435 FORWARDweakly similar to ( 176) KPRO\_MAIZE Putative receptor protein kinase ZmPK1 precursor (EC 2.7.11.1) - Zea mays (Maize)highly similar to ( 570) loc\_os04g56110 12004.m35493 protein ATP binding protein, putative, expressed seq=cds; coord=10:146170484..146172446:-1; parent\_gene=GRMZM2G007477'

'highly similar to ( 512) AT1G74910 | Symbols: | ADP-glucose pyrophosphorylase family protein | chr1:28135770-28138456 REVERSEhighly similar to ( 603) loc\_os03g11050 12003.m35086 protein mannose-1-phosphate guanyltransferase, putative, expressed seq=cds; coord=1:21196693..21221560:1; parent\_gene=GRMZM2G064841'

'highly similar to ( 512) AT1G74910 | Symbols: | ADP-glucose pyrophosphorylase family protein | chr1:28135770-28138456 REVERSEhighly similar to ( 603) loc\_os03g11050 12003.m35086 protein mannose-1-phosphate guanyltransferase, putative, expressed seq=cds; coord=1:21196693..21221560:1; parent\_gene=GRMZM2G064841'



'highly similar to ( 551) AT5G67385 | Symbols: | protein binding / signal transducer | chr5:26884754-26887083  
FORWARDmoderately similar to ( 275) NPH3\_ORYSA Coleoptile phototropism protein 1 (Non-phototropic  
hypocotyl 3-like protein) (NPH3-like protein) - Oryza sativa (Rice)highly similar to ( 757) loc\_os03g10880  
12003.m101233 protein transposon protein, putative, Mutator sub-class, expressed seq=cds;  
coord=1:21471914..21474815:1; parent\_gene=GRMZM2G004523'

'seq=cds; coord=1:21678945..21680766:-1; parent\_gene=GRMZM2G415251'

'seq=cds; coord=1:21678945..21680766:-1; parent\_gene=GRMZM2G415251'

'moderately similar to ( 253) AT3G51620 | Symbols: | unknown protein | chr3:19143859-19147944  
FORWARDmoderately similar to ( 329) loc\_os03g21850 12003.m35216 protein expressed protein seq=cds;  
coord=1:56283126..56286467:1; parent\_gene=GRMZM2G063657'

'weakly similar to ( 194) AT1G19110 | Symbols: | inter-alpha-trypsin inhibitor heavy chain-related | chr1:6602270-  
6605766 FORWARDmoderately similar to ( 315) loc\_os03g29350 12003.m34881 protein von Willebrand factor type  
A domain containing protein, expressed seq=cds; coord=1:70581525..70590132:-1; parent\_gene=GRMZM2G524711'

'moderately similar to ( 249) AT2G15480 | Symbols: UGT73B5 | UGT73B5 (UDP-glucosyl transferase 73B5); UDP-  
glucosyltransferase/ UDP-glycosyltransferase/ quercetin 3-O-glucosyltransferase/ transferase, transferring glycosyl  
groups | chr2:6758817-6760452 FORWARDweakly similar to ( 139) IAAG\_MAIZE Indole-3-acetate beta-  
glucosyltransferase (EC 2.4.1.121) (IAA-Glu synthetase) ((Uridine 5'-diphosphate-glucose:indol-3-ylacetyl)-beta-D-  
glucosyl transferase) - Zea mays (Maize)highly similar to ( 608) loc\_os03g59350 12003.m10833 protein cytokinin-O-  
glucosyltransferase 3, putative, expressed seq=cds; coord=1:275582841..275584525:-1;  
parent\_gene=GRMZM2G074395'

'weakly similar to ( 135) AT3G48100 | Symbols: ARR5, ATRR2, IBC6 | ARR5 (ARABIDOPSIS RESPONSE  
REGULATOR 5); transcription regulator/ two-component response regulator | chr3:17759112-17760740  
REVERSEweakly similar to ( 189) loc\_os04g57720 12004.m10657 protein OsRR6 - Rice type-A response regulator,  
expressed seq=cds; coord=2:2081848..2082630:-1; parent\_gene=GRMZM2G040736'

'moderately similar to ( 202) AT3G12130 | Symbols: | KH domain-containing protein / zinc finger (CCCH type)  
family protein | chr3:3864486-3866406 REVERSEmoderately similar to ( 430) loc\_os04g57010 12004.m79001  
protein zinc finger C-x8-C-x5-C-x3-H type family protein, expressed seq=cds; coord=2:3089969..3094480:-1;  
parent\_gene=GRMZM2G071034'

'moderately similar to ( 490) AT4G23030 | Symbols: | MATE efflux protein-related | chr4:12072857-12074365  
FORWARDhighly similar to ( 775) loc\_os04g48290 12004.m09766 protein antiporter/ drug transporter/ transporter,  
putative, expressed seq=cds; coord=2:16638278..16640447:-1; parent\_gene=GRMZM2G080992'

'highly similar to ( 764) AT1G62740 | Symbols: | stress-inducible protein, putative | chr1:23231026-23233380  
FORWARDhighly similar to ( 620) STIP\_SOYBN Heat shock protein STI (Stress-inducible protein) (GmSTI) -  
Glycine max (Soybean)highly similar to ( 858) loc\_os04g45480 12004.m09501 protein heat shock protein STI,  
putative, expressed seq=cds; coord=2:22504092..22513426:-1; parent\_gene=GRMZM2G070863'

'weakly similar to ( 164) AT5G43960 | Symbols: | nuclear transport factor 2 (NTF2) family protein / RNA recognition motif (RRM)-containing protein | chr5:17689154-17691653 REVERSEmoderately similar to ( 394) loc\_os04g43150 12004.m09279 protein RNA-binding protein-like, putative, expressed seq=cds; coord=2:28564081..28569611:1; parent\_gene=GRMZM2G002903'

'weakly similar to ( 164) AT5G43960 | Symbols: | nuclear transport factor 2 (NTF2) family protein / RNA recognition motif (RRM)-containing protein | chr5:17689154-17691653 REVERSEmoderately similar to ( 394) loc\_os04g43150 12004.m09279 protein RNA-binding protein-like, putative, expressed seq=cds; coord=2:28564081..28569611:1; parent\_gene=GRMZM2G002903'

'highly similar to ( 593) AT4G14340 | Symbols: CKI1, CKL11 | CKI1 (CASEIN KINASE I); kinase/ protein serine/threonine kinase | chr4:8248532-8251668 REVERSEhighly similar to ( 702) loc\_os04g43490 12004.m101584 protein casein kinase I isoform delta-like, putative, expressed seq=cds; coord=2:28936197..28940916:-1; parent\_gene=GRMZM2G032694'

'weakly similar to ( 177) AT3G08710 | Symbols: ATH9 | ATH9 (thioredoxin H-type 9) | chr3:2645590-2646304 FORWARDweakly similar to ( 105) TRXH\_WHEAT Thioredoxin H-type (TRX-H) (TrxTa) - Triticum aestivum (Wheat)moderately similar to ( 221) loc\_os05g07690 12005.m27714 protein thioredoxin H-type, putative, expressed seq=cds; coord=3:13465241..13467448:1; parent\_gene=GRMZM2G159145'

'moderately similar to ( 261) AT5G16450 | Symbols: | dimethylmenaquinone methyltransferase family protein | chr5:5374357-5375342 FORWARDmoderately similar to ( 306) loc\_os01g52460 12001.m11420 protein regulator of ribonuclease activity A, putative, expressed seq=cds; coord=3:17033772..17034278:1; parent\_gene=AC215260.3\_FG004'

'moderately similar to ( 261) AT5G16450 | Symbols: | dimethylmenaquinone methyltransferase family protein | chr5:5374357-5375342 FORWARDmoderately similar to ( 306) loc\_os01g52460 12001.m11420 protein regulator of ribonuclease activity A, putative, expressed seq=cds; coord=3:17033772..17034278:1; parent\_gene=AC215260.3\_FG004'

'moderately similar to ( 409) AT1G25390 | Symbols: | protein kinase family protein | chr1:8906640-8908800 REVERSEmoderately similar to ( 222) CRI4\_MAIZE Putative receptor protein kinase CRINKLY4 precursor (EC 2.7.11.1) - Zea mays (Maize)highly similar to ( 631) loc\_os01g04409 12001.m07075 protein OsWAK1 - OsWAK receptor-like cytoplasmic kinase (OsWAK-RLCK), expressed seq=cds; coord=3:20399610..20409348:1; parent\_gene=GRMZM2G013790'

'moderately similar to ( 253) AT3G14470 | Symbols: | disease resistance protein (NBS-LRR class), putative | chr3:4857940-4861104 FORWARDhighly similar to ( 985) loc\_os01g35254 12001.m09827 protein transposon protein, putative, CACTA, En/Spm sub-class seq=cds; coord=3:113896010..113902317:-1; parent\_gene=AC230011.2\_FG002'

'highly similar to ( 630) AT3G44200 | Symbols: ATNEK6, NEK6, IBO1 | NEK6 ("NIMA (NEVER IN MITOSIS, GENE A)-RELATED 6"); ATP binding / kinase/ protein kinase/ protein serine/threonine kinase | chr3:15906788-15911365 FORWARDweakly similar to ( 130) CIPK1\_ORYSA CIPK-like protein 1 (EC 2.7.11.1) (OsCK1) - Oryza sativa (Rice)nearly identical (1145) loc\_os01g64490 12001.m12563 protein ATP binding protein, putative, expressed seq=cds; coord=3:176289472..176295491:1; parent\_gene=GRMZM2G074262'

'very weakly similar to (85.1) loc\_os01g41360 12001.m10403 protein expressed protein seq=cds; coord=3:222892155..222892812:-1; parent\_gene=GRMZM2G368767'

'weakly similar to ( 164) AT4G35160 | Symbols: | O-methyltransferase family 2 protein | chr4:16730989-16732808 REVERSEhighly similar to ( 647) ZRP4\_MAIZE O-methyltransferase ZRP4 (EC 2.1.1.-) (OMT) - Zea mays (Maize)moderately similar to ( 410) loc\_os05g43930 12005.m08519 protein O-methyltransferase ZRP4, putative, expressed seq=cds; coord=4:11916303..11917798:-1; parent\_gene=GRMZM2G017557'

'moderately similar to ( 376) AT3G03080 | Symbols: | NADP-dependent oxidoreductase, putative | chr3:698530-700278 REVERSEmoderately similar to ( 444) loc\_os11g14910 12011.m05627 protein NADP-dependent oxidoreductase P1, putative, expressed seq=cds; coord=4:12220797..12222465:-1; parent\_gene=GRMZM2G110965'

'weakly similar to ( 137) AT5G50570 | Symbols: | squamosa promoter-binding protein, putative | chr5:20582555-20583791 REVERSEweakly similar to ( 120) SBP1\_ANTMA Squamosa promoter-binding protein 1 - Antirrhinum majus (Garden snapdragon)weakly similar to ( 155) loc\_os08g41940 12008.m08172 protein teosinte glume architecture 1, putative, expressed seq=cds; coord=4:17489205..17501119:1; parent\_gene=GRMZM2G106798'

'highly similar to ( 905) AT5G60790 | Symbols: ATGCN1, GCN1 | ATGCN1; transporter | chr5:24453760-24455767 REVERSEnearly identical (1004) loc\_os08g45010 12008.m08472 protein ATP-binding cassette sub-family F member 2, putative, expressed seq=cds; coord=4:49443895..49447342:-1; parent\_gene=GRMZM2G031954'

'weakly similar to ( 116) AT1G79460 | Symbols: GA2, KS, ATKS | GA2 (GA REQUIRING 2); ent-kaurene synthase | chr1:29890568-29894436 FORWARDweakly similar to ( 119) KSB\_CUCMA Ent-kaurene synthase B, chloroplast precursor (EC 4.2.3.19) (KSB) - Cucurbita maxima (Pumpkin) (Winter squash)weakly similar to ( 175) loc\_os04g52230 12004.m10118 protein ent-kaurene synthase B, chloroplast precursor, putative, expressed seq=cds; coord=4:53257241..53258494:-1; parent\_gene=GRMZM2G391312'

'weakly similar to ( 113) AT3G18710 | Symbols: PUB29, ATPUB29 | PUB29 (PLANT U-BOX 29); ubiquitin-protein ligase | chr3:6434234-6435481 REVERSEmoderately similar to ( 438) loc\_os02g33680 12002.m08459 protein U-box domain containing protein, expressed seq=cds; coord=4:111895429..111896985:1; parent\_gene=GRMZM2G127690'

'seq=cds; coord=4:141593772..141594427:1; parent\_gene=GRMZM2G118717'

'moderately similar to ( 221) AT4G13180 | Symbols: | short-chain dehydrogenase/reductase (SDR) family protein | chr4:7657373-7658164 REVERSEmoderately similar to ( 206) SDR1\_PICAB Short-chain type dehydrogenase/reductase (EC 1.-.-) - Picea abies (Norway spruce) (Picea excelsa)moderately similar to ( 344) loc\_os06g08600 12006.m05579 protein versicolorin reductase, putative, expressed seq=cds; coord=4:174050248..174051484:1; parent\_gene=GRMZM2G316789'

'moderately similar to ( 221) AT4G13180 | Symbols: | short-chain dehydrogenase/reductase (SDR) family protein | chr4:7657373-7658164 REVERSEmoderately similar to ( 206) SDR1\_PICAB Short-chain type dehydrogenase/reductase (EC 1.-.-) - Picea abies (Norway spruce) (Picea excelsa)moderately similar to ( 344) loc\_os06g08600 12006.m05579 protein versicolorin reductase, putative, expressed seq=cds; coord=4:174050248..174051484:1; parent\_gene=GRMZM2G316789'

'moderately similar to ( 221) AT4G13180 | Symbols: | short-chain dehydrogenase/reductase (SDR) family protein | chr4:7657373-7658164 REVERSEmoderately similar to ( 206) SDR1\_PICAB Short-chain type dehydrogenase/reductase (EC 1.-.-) - Picea abies (Norway spruce) (Picea excelsa)moderately similar to ( 344) loc\_os06g08600 12006.m05579 protein versicolorin reductase, putative, expressed seq=cds; coord=4:174050248..174051484:1; parent\_gene=GRMZM2G316789'

'moderately similar to ( 323) AT5G20720 | Symbols: CPN20, CPN10, CHCPN10, ATCPN21, CPN21 | CPN20 (CHAPERONIN 20); calmodulin binding | chr5:7015015-7016354 FORWARDmoderately similar to ( 298) CH10C\_SPIOL 20 kDa chaperonin, chloroplast precursor (Protein Cpn21) (Chloroplast protein Cpn10) (Chloroplast chaperonin 10) (Ch-CPN10) - Spinacia oleracea (Spinach)moderately similar to ( 357) loc\_os06g09679 12006.m31856 protein chaperonin, chloroplast precursor, putative, expressed seq=cds; coord=4:176500156..176502218:1; parent\_gene=GRMZM2G091189'

'nearly identical (1585) AT2G31900 | Symbols: XIF, ATXIF, ATMYO5 | XIF; motor | chr2:13560760-13569623 REVERSEnearly identical (1782) loc\_os03g53660 12003.m10336 protein XIF, putative, expressed seq=cds; coord=5:7359267..7367484:-1; parent\_gene=GRMZM2G460396'

'moderately similar to ( 323) AT3G22845 | Symbols: | emp24/gp25L/p24 protein-related | chr3:8087373-8088550 FORWARDmoderately similar to ( 377) loc\_os03g53310 12003.m10303 protein suppressor/enhancer of lin-12 protein 9 precursor, putative, expressed seq=cds; coord=5:7598126..7603275:1; parent\_gene=GRMZM2G147046'

'moderately similar to ( 273) AT1G28590 | Symbols: | lipase, putative | chr1:10047509-10049300 REVERSEweakly similar to ( 146) EST\_HEVBR Esterase precursor (EC 3.1.1.-) (Early nodule-specific protein homolog) (Latex allergen Hev b 13) - Hevea brasiliensis (Para rubber tree)highly similar to ( 553) loc\_os06g47910 12006.m09317 protein alpha-L-fucosidase 2 precursor, putative, expressed seq=cds; coord=5:53003394..53005408:-1; parent\_gene=GRMZM2G048904'

'weakly similar to ( 183) AT5G52260 | Symbols: AtMYB19 | AtMYB19 (myb domain protein 19); DNA binding / transcription factor | chr5:21220165-21221223 FORWARDweakly similar to ( 172) MYB3\_HORVU Myb-related protein Hv33 - Hordeum vulgare (Barley)moderately similar to ( 384) loc\_os02g02370 12002.m05586 protein transcription factor MYB86, putative seq=cds; coord=5:69302388..69303967:-1; parent\_gene=GRMZM2G088189'

'weakly similar to ( 183) AT5G52260 | Symbols: AtMYB19 | AtMYB19 (myb domain protein 19); DNA binding / transcription factor | chr5:21220165-21221223 FORWARDweakly similar to ( 172) MYB3\_HORVU Myb-related protein Hv33 - Hordeum vulgare (Barley)moderately similar to ( 384) loc\_os02g02370 12002.m05586 protein transcription factor MYB86, putative seq=cds; coord=5:69302388..69303967:-1; parent\_gene=GRMZM2G088189'

'highly similar to ( 726) AT1G70570 | Symbols: | anthranilate phosphoribosyltransferase, putative | chr1:26608719-26612062 FORWARDhighly similar to ( 899) loc\_os02g03850 12002.m05734 protein expressed protein seq=cds; coord=5:74621198..74625869:1; parent\_gene=GRMZM2G168791'

'highly similar to ( 600) AT1G10930 | Symbols: ATSGS1, RECQ4A, ATRECQ4A | RECQ4A; ATP binding / ATP-dependent helicase/ helicase/ nucleic acid binding | chr1:3648032-3654997 REVERSEhighly similar to ( 664) loc\_os04g35420 12004.m08631 protein ATSGS1, putative, expressed seq=cds; coord=5:77260588..77273432:-1; parent\_gene=GRMZM2G319573'

'moderately similar to ( 459) AT4G29990 | Symbols: | light repressible receptor protein kinase | chr4:14665802-14669438 REVERSEmoderately similar to ( 224) NORK\_PEA Nodulation receptor kinase precursor (EC 2.7.11.1) - Pisum sativum (Garden pea)highly similar to ( 924) loc\_os02g05730 12002.m05921 protein protein kinase domain containing protein, expressed seq=cds; coord=5:80795990..80800856:-1; parent\_gene=GRMZM2G093490'

'very weakly similar to (89.7) AT1G53820 | Symbols: | zinc finger (C3HC4-type RING finger) family protein | chr1:20091491-20092423 FORWARDweakly similar to ( 146) EL5\_ORYSA E3 ubiquitin-protein ligase EL5 (EC 6.3.2.-) - Oryza sativa (Rice)weakly similar to ( 146) loc\_os02g35429 12002.m08631 protein zinc finger, C3HC4 type family protein seq=cds; coord=5:174017496..174018659:1; parent\_gene=GRMZM2G460958'

'weakly similar to ( 137) AT3G52090 | Symbols: ATRPB13.6, NRPB11, NRPD11, NRPE11 | NRPB11; DNA binding / DNA-directed RNA polymerase | chr3:19318069-19318998 REVERSEweakly similar to ( 146) loc\_os07g07610 12007.m05220 protein DNA-directed RNA polymerase II subunit J, putative, expressed seq=cds; coord=5:184738650..184741012:1; parent\_gene=GRMZM2G043461'

'moderately similar to ( 477) AT5G19320 | Symbols: RANGAP2 | RANGAP2 (RAN GTPASE ACTIVATING PROTEIN 2); RAN GTPase activator | chr5:6505310-6506947 REVERSEhighly similar to ( 677) loc\_os05g46560 12005.m27945 protein ran GTPase activating protein, putative, expressed seq=cds; coord=5:185399193..185401809:1; parent\_gene=GRMZM2G148301'

'weakly similar to ( 161) AT1G70670 | Symbols: | caleosin-related family protein | chr1:26644830-26645970 FORWARDmoderately similar to ( 243) loc\_os02g50174 12002.m10050 protein caleosin related protein, expressed seq=cds; coord=5:205154533..205156657:1; parent\_gene=GRMZM2G090609'

'highly similar to ( 580) AT2G01830 | Symbols: WOL, CRE1, WOL1, AHK4, ATCRE1 | WOL (WOODEN LEG); cytokinin receptor/ osmosensor/ phosphoprotein phosphatase/ protein histidine kinase | chr2:363332-367429 REVERSEvery weakly similar to (92.4) ETR1\_BRAOL Ethylene receptor (EC 2.7.13.3) - Brassica oleracea (Wild cabbage)highly similar to ( 800) loc\_os02g50480 12002.m10082 protein histidine kinase 1, putative, expressed seq=cds; coord=5:205544166..205551400:1; parent\_gene=GRMZM2G151223'

'weakly similar to ( 137) AT5G10770 | Symbols: | chloroplast nucleoid DNA-binding protein, putative | chr5:3403331-3405331 REVERSEmoderately similar to ( 312) loc\_os06g20110 12006.m06668 protein chloroplast nucleoid DNA binding protein, putative seq=cds; coord=6:120607748..120609208:-1; parent\_gene=GRMZM2G110168'

'moderately similar to ( 326) AT3G21770 | Symbols: | peroxidase 30 (PER30) (P30) (PRXR9) | chr3:7673345-7674661 FORWARDmoderately similar to ( 372) PER1\_ORYSA Peroxidase 1 precursor (EC 1.11.1.7) - Oryza sativa (Rice)moderately similar to ( 484) loc\_os06g29470 12006.m07491 protein peroxidase 1 precursor, putative, expressed seq=cds; coord=6:120912973..120914397:1; parent\_gene=GRMZM2G104109'

'moderately similar to ( 283) AT1G05260 | Symbols: RCI3, RCI3A | RCI3 (RARE COLD INDUCIBLE GENE 3); peroxidase | chr1:1529827-1531271 FORWARDmoderately similar to ( 266) PER1\_ORYSA Peroxidase 1 precursor (EC 1.11.1.7) - Oryza sativa (Rice)moderately similar to ( 459) loc\_os05g06970 12005.m05223 protein peroxidase 1 precursor, putative, expressed seq=cds; coord=6:125154676..125157008:1; parent\_gene=GRMZM2G450233'

'moderately similar to ( 228) AT1G22740 | Symbols: RAB7, ATRABG3B, RAB75, RABG3B | RABG3B; GTP binding | chr1:8049247-8050494 FORWARDmoderately similar to ( 244) RAB7\_SOYBN Ras-related protein Rab7 - Glycine max (Soybean)moderately similar to ( 272) loc\_os05g46000 12005.m08725 protein ras-related protein Rab7, putative, expressed seq=cds; coord=6:161464139..161465906:1; parent\_gene=GRMZM2G090034'

'moderately similar to ( 209) AT1G09830 | Symbols: | phosphoribosylamine--glycine ligase (PUR2) | chr1:3192783-3194936 REVERSEweakly similar to ( 167) PUR2\_VIGUN Phosphoribosylamine--glycine ligase (EC 6.3.4.13) (GARS) (Glycinamide ribonucleotide synthetase) (Phosphoribosylglycinamide synthetase) (Fragment) - Vigna unguiculata (Cowpea)moderately similar to ( 242) loc\_os08g09210 12008.m080100 protein phosphoribosylamine--glycine ligase, putative, expressed seq=cds; coord=6:161796867..161797813:1; parent\_gene=GRMZM2G088995'

'very weakly similar to (81.6) AT2G41900 | Symbols: | zinc finger (CCCH-type) family protein | chr2:17491352-17493502 FORWARDweakly similar to ( 166) loc\_os12g33090 12012.m07107 protein nucleic acid binding protein, putative, expressed seq=cds; coord=7:2554871..2557423:-1; parent\_gene=AC199624.4\_FG007'

'weakly similar to ( 143) AT5G57625 | Symbols: | allergen V5/Tpx-1-related family protein | chr5:23337865-23338577 FORWARDweakly similar to ( 177) PR13\_HORVU Pathogenesis-related protein PRB1-3 precursor (PR-1B) (HV-8) - Hordeum vulgare (Barley)weakly similar to ( 194) loc\_os07g03710 12007.m04841 protein pathogenesis-related protein PRB1-3 precursor, putative, expressed seq=cds; coord=7:3483732..3484794:1; parent\_gene=GRMZM2G465226'

'very weakly similar to (93.2) AT3G28917 | Symbols: MIF2 | MIF2 (MINI ZINC FINGER 2); DNA binding | chr3:10925014-10925316 FORWARDweakly similar to ( 139) loc\_os09g24810 12009.m05635 protein mini zinc finger 3, putative, expressed seq=cds; coord=7:112630524..112633217:1; parent\_gene=GRMZM2G071112'

'highly similar to ( 967) AT1G26850 | Symbols: | dehydration-responsive family protein | chr1:9301146-9303432 REVERSEnearly identical (1186) loc\_os09g24900 12009.m22086 protein ankyrin protein kinase-like, putative, expressed seq=cds; coord=7:112980176..112983545:1; parent\_gene=GRMZM2G114706'

'moderately similar to ( 329) AT3G02470 | Symbols: | SAMDC (S-ADENOSYLMETHIONINE DECARBOXYLASE); adenosylmethionine decarboxylase | chr3:510223-511323 FORWARDmoderately similar to ( 487) DCAM\_ORYSA S-adenosylmethionine decarboxylase proenzyme (EC 4.1.1.50) (AdoMetDC) (SamDC) [Contains: S-adenosylmethionine decarboxylase alpha chain; S-adenosylmethionine decarboxylase beta chain] - Oryza sativa (Rice)highly similar to ( 592) loc\_os09g25620 12009.m059977 protein S-adenosylmethionine decarboxylase proenzyme, putative, expressed seq=cds; coord=7:118016000..118018602:-1; parent\_gene=GRMZM2G060369'

'very weakly similar to (81.3) AT2G41940 | Symbols: ZFP8 | ZFP8 (ZINC FINGER PROTEIN 8); nucleic acid binding / transcription factor/ zinc ion binding | chr2:17507556-17508329 FORWARDweakly similar to ( 182) loc\_os09g27320 12009.m05884 protein zinc finger protein, putative seq=cds; coord=7:122716983..122718164:1; parent\_gene=GRMZM2G128212'

'very weakly similar to (95.5) AT5G15350 | Symbols: | plastocyanin-like domain-containing protein | chr5:4985184-4986154 REVERSEmoderately similar to ( 222) loc\_os09g38540 12009.m06795 protein blue copper protein precursor, putative, expressed seq=cds; coord=7:145769695..145771418:-1; parent\_gene=GRMZM2G485559'

'moderately similar to ( 487) AT5G08030 | Symbols: | glycerophosphoryl diester phosphodiesterase family protein | chr5:2575152-2576770 REVERSEhighly similar to ( 584) loc\_os07g41150 12007.m08351 protein glycerophosphoryl diester phosphodiesterase precursor, putative, expressed seq=cds; coord=7:163783254..163784893:-1; parent\_gene=GRMZM2G017550'

'moderately similar to ( 319) AT4G35880 | Symbols: | aspartyl protease family protein | chr4:16993339-16995721 FORWARDvery weakly similar to (81.3) ASP1\_ORYSA Aspartic proteinase Asp1 precursor (EC 3.4.23.-) (OsAsp1) (OSAP1) (Nucellin-like protein) - Oryza sativa (Rice)highly similar to ( 511) loc\_os09g37012 12009.m06650 protein aspartic-type endopeptidase/ pepsin A, putative, expressed seq=cds; coord=7:175289779..175291198:1; parent\_gene=GRMZM2G420910'

'weakly similar to ( 192) AT3G25480 | Symbols: | rhodanese-like domain-containing protein | chr3:9235591-9236598 REVERSEmoderately similar to ( 405) loc\_os01g66600 12001.m12767 protein expressed protein seq=cds; coord=8:164616426..164619629:1; parent\_gene=GRMZM2G080816'

'weakly similar to ( 171) AT3G08910 | Symbols: | DNAJ heat shock protein, putative | chr3:2710402-2711811 REVERSEmoderately similar to ( 434) loc\_os01g65480 12001.m12659 protein dnaJ protein homolog 1, putative, expressed seq=cds; coord=8:165594730..165597234:-1; parent\_gene=GRMZM2G128248'

'moderately similar to ( 434) AT4G06599 | Symbols: | ubiquitin family protein | chr4:3666079-3667495 REVERSEmoderately similar to ( 500) loc\_os01g65450 12001.m150790 protein ubiquitin-like domain containing CTD phosphatase 1, putative, expressed seq=cds; coord=8:165678358..165682072:1; parent\_gene=GRMZM2G114172'

'moderately similar to ( 434) AT4G06599 | Symbols: | ubiquitin family protein | chr4:3666079-3667495 REVERSEmoderately similar to ( 500) loc\_os01g65450 12001.m150790 protein ubiquitin-like domain containing CTD phosphatase 1, putative, expressed seq=cds; coord=8:165678358..165682072:1; parent\_gene=GRMZM2G114172'

'moderately similar to ( 434) AT4G06599 | Symbols: | ubiquitin family protein | chr4:3666079-3667495 REVERSEmoderately similar to ( 500) loc\_os01g65450 12001.m150790 protein ubiquitin-like domain containing CTD phosphatase 1, putative, expressed seq=cds; coord=8:165678358..165682072:1; parent\_gene=GRMZM2G114172'

'moderately similar to ( 233) AT1G07090 | Symbols: LSH6 | LSH6 (LIGHT SENSITIVE HYPOCOTYLS 6) | chr1:2174202-2174792 REVERSEmoderately similar to ( 276) loc\_os01g61310 12001.m12257 protein conserved hypothetical protein seq=cds; coord=8:169911769..169913354:1; parent\_gene=GRMZM2G135332'

'highly similar to ( 520) AT5G08030 | Symbols: | glycerophosphoryl diester phosphodiesterase family protein | chr5:2575152-2576770 REVERSEhighly similar to ( 639) loc\_os01g55780 12001.m11736 protein glycerophosphoryl diester phosphodiesterase precursor, putative, expressed seq=cds; coord=8:173244055..173251921:-1; parent\_gene=GRMZM2G153274'

'highly similar to ( 520) AT5G08030 | Symbols: | glycerophosphoryl diester phosphodiesterase family protein | chr5:2575152-2576770 REVERSEhighly similar to ( 639) loc\_os01g55780 12001.m11736 protein glycerophosphoryl diester phosphodiesterase precursor, putative, expressed seq=cds; coord=8:173244055..173251921:-1; parent\_gene=GRMZM2G153274'

'highly similar to ( 523) AT5G55220 | Symbols: | trigger factor type chaperone family protein | chr5:22397677-22400678 FORWARDhighly similar to ( 772) loc\_os06g20320 12006.m06689 protein trigger factor-like protein, putative, expressed seq=cds; coord=10:2654215..2662976:-1; parent\_gene=GRMZM2G127393'

'very weakly similar to (87.4) AT3G14470 | Symbols: | disease resistance protein (NBS-LRR class), putative | chr3:4857940-4861104 FORWARDmoderately similar to ( 431) loc\_os02g16270 12002.m100165 protein xa1-like protein, putative, expressed seq=cds; coord=10:3160819..3166305:1; parent\_gene=GRMZM2G356817'

'moderately similar to ( 365) AT3G14460 | Symbols: | disease resistance protein (NBS-LRR class), putative | chr3:4851990-4856264 REVERSEnearly identical (1454) loc\_os01g57340 12001.m11885 protein rp1-like protein, putative, expressed seq=cds; coord=10:3698044..3702576:-1; parent\_gene=GRMZM2G443939'

'moderately similar to ( 302) AT1G32360 | Symbols: | zinc finger (CCCH-type) family protein | chr1:11673325-11675162 FORWARDmoderately similar to ( 438) loc\_os08g06330 12008.m04772 protein zinc finger C-x8-C-x5-C-x3-H type family protein, expressed seq=cds; coord=10:77445844..77449872:1; parent\_gene=GRMZM2G305582'

'weakly similar to ( 157) AT4G33420 | Symbols: | peroxidase, putative | chr4:16084856-16086105 FORWARDweakly similar to ( 138) PER1\_ARAHY Cationic peroxidase 1 precursor (EC 1.11.1.7) (PNPC1) - Arachis hypogaea (Peanut)moderately similar to ( 436) loc\_os05g04380 12005.m27687 protein peroxidase 1 precursor, putative, expressed seq=cds; coord=10:85644092..85645627:1; parent\_gene=GRMZM2G394500'

'highly similar to ( 557) AT1G08250 | Symbols: ADT6 | ADT6 (arogenate dehydratase 6); arogenate dehydratase/prephenate dehydratase | chr1:2588994-2590235 REVERSEhighly similar to ( 687) loc\_os04g33390 12004.m08428 protein P-protein, putative, expressed seq=cds; coord=10:113515151..113516898:1; parent\_gene=GRMZM2G125923'

'moderately similar to ( 484) AT2G27050 | Symbols: EIL1 | EIL1 (ETHYLENE-INSENSITIVE3-LIKE 1); transcription factor/transcription regulator | chr2:11546314-11548068 FORWARDhighly similar to ( 991) loc\_os03g20790 12003.m07486 protein ETHYLENE-INSENSITIVE3-like 1 protein, putative, expressed seq=cds; coord=1:52564282..52568326:-1; parent\_gene=GRMZM2G033570'

'highly similar to ( 597) AT4G16600 | Symbols: | transferase, transferring glycosyl groups / transferase, transferring hexosyl groups | chr4:9350039-9352707 FORWARDhighly similar to ( 822) loc\_os10g40640 12010.m06834 protein transferase, transferring glycosyl groups, putative, expressed seq=cds; coord=1:92238858..92242166:1; parent\_gene=GRMZM2G114772'



'moderately similar to ( 267) AT5G66880 | Symbols: SNRK2-3, SNRK2.3, SRK2I | SNRK2.3 (SUCROSE NONFERMENTING 1(SNF1)-RELATED PROTEIN KINASE 2.3); kinase/ protein kinase | chr5:26710697-26712732 FORWARDmoderately similar to ( 296) SAPK3\_ORYSA Serine/threonine-protein kinase SAPK3 (EC 2.7.11.1) (Osmotic stress/abscisic acid-activated protein kinase 3) (Protein kinase REK) - Oryza sativa (Rice)moderately similar to ( 296) loc\_os10g41490 12010.m065205 protein serine/threonine-protein kinase SAPK3, putative, expressed seq=cds; coord=1:94888584..94892171:-1; parent\_gene=GRMZM2G180916'

'highly similar to ( 737) AT2G18900 | Symbols: | transducin family protein / WD-40 repeat family protein | chr2:8188491-8192409 REVERSEearly identical (1244) loc\_os12g41620 12012.m07942 protein nucleotide binding protein, putative, expressed seq=cds; coord=1:172815913..172822534:1; parent\_gene=GRMZM2G049201'

'moderately similar to ( 445) AT1G16680 | Symbols: | DNAJ heat shock N-terminal domain-containing protein / S-locus protein, putative | chr1:5702813-5705537 FORWARDhighly similar to ( 924) loc\_os12g41820 12012.m07963 protein S-locus protein 5, putative, expressed seq=cds; coord=1:173219421..173225579:-1; parent\_gene=GRMZM2G003635'

'weakly similar to ( 109) loc\_os09g01620 12009.m03537 protein RNA binding protein, putative, expressed seq=cds; coord=1:207183902..207184588:1; parent\_gene=GRMZM2G037648'

'weakly similar to ( 172) AT1G26880 | Symbols: | 60S ribosomal protein L34 (RPL34A) | chr1:9315798-9316681 REVERSEweakly similar to ( 175) RL34\_TOBAC 60S ribosomal protein L34 - Nicotiana tabacum (Common tobacco)weakly similar to ( 188) loc\_os09g24690 12009.m05623 protein 60S ribosomal protein L34, putative, expressed seq=cds; coord=1:212949285..212951440:1; parent\_gene=GRMZM2G152552'

'moderately similar to ( 253) AT3G15080 | Symbols: | exonuclease family protein | chr3:5074319-5076327 FORWARDmoderately similar to ( 375) loc\_os08g28980 12008.m06902 protein RNA exonuclease 4, putative, expressed seq=cds; coord=1:219892621..219901471:1; parent\_gene=GRMZM2G015925'

'nearly identical (1679) AT4G38190 | Symbols: ATCSLD4, CSLD4 | ATCSLD4; cellulose synthase/ transferase, transferring glycosyl groups | chr4:17910096-17913641 REVERSEearly identical (1967) loc\_os08g25710 12008.m06587 protein CSLD3 - cellulose synthase-like family D, expressed seq=cds; coord=1:221785673..221789403:1; parent\_gene=GRMZM2G044269'

'weakly similar to ( 135) AT3G48100 | Symbols: ARR5, ATRR2, IBC6 | ARR5 (ARABIDOPSIS RESPONSE REGULATOR 5); transcription regulator/ two-component response regulator | chr3:17759112-17760740 REVERSEweakly similar to ( 189) loc\_os04g57720 12004.m10657 protein OsRR6 - Rice type-A response regulator, expressed seq=cds; coord=2:2081848..2082630:-1; parent\_gene=GRMZM2G040736'

'weakly similar to ( 135) AT3G48100 | Symbols: ARR5, ATRR2, IBC6 | ARR5 (ARABIDOPSIS RESPONSE REGULATOR 5); transcription regulator/ two-component response regulator | chr3:17759112-17760740 REVERSEweakly similar to ( 189) loc\_os04g57720 12004.m10657 protein OsRR6 - Rice type-A response regulator, expressed seq=cds; coord=2:2081848..2082630:-1; parent\_gene=GRMZM2G040736'

'very weakly similar to (96.7) AT5G25190 | Symbols: | ethylene-responsive element-binding protein, putative | chr5:8707007-8707655 REVERSEweakly similar to ( 121) loc\_os04g56150 12004.m10506 protein ethylene-responsive transcription factor 4, putative seq=cds; coord=2:4347237..4347860:1; parent\_gene=GRMZM2G067463'

'moderately similar to ( 285) AT1G18190 | Symbols: GC2 | GC2 (golgin candidate 2) | chr1:6257963-6261325 REVERSEvery weakly similar to (86.3) GOGA5\_ORYSA Golgin-84 - Oryza sativa (Rice)moderately similar to ( 458) loc\_os04g55810 12004.m10472 protein expressed protein seq=cds; coord=2:4876176..4880569:1; parent\_gene=GRMZM2G095308'

'weakly similar to ( 171) loc\_os05g41240 12005.m27895 protein MYB transcription factor, putative, expressed seq=cds; coord=2:36578346..36579034:1; parent\_gene=GRMZM2G093832'

'weakly similar to ( 107) AT2G43670 | Symbols: | glycosyl hydrolase family protein 17 | chr2:18105145-18105874 FORWARDweakly similar to ( 148) loc\_os01g14140 12001.m150537 protein glucan endo-1,3-beta-glucosidase 4 precursor, putative, expressed seq=cds; coord=2:38140570..38141696:-1; parent\_gene=GRMZM2G447691'

'weakly similar to ( 196) loc\_os10g20270 12010.m05048 protein conserved hypothetical protein seq=cds; coord=2:39033129..39046983:-1; parent\_gene=GRMZM2G326631'

'highly similar to ( 537) AT5G23810 | Symbols: AAP7 | AAP7; amino acid transmembrane transporter | chr5:8028461-8030138 FORWARDhighly similar to ( 704) loc\_os04g39489 12004.m35579 protein AAP7, putative, expressed seq=cds; coord=2:39327335..39330173:1; parent\_gene=GRMZM2G155491'

'weakly similar to ( 105) AT1G22310 | Symbols: MBD8 | MBD8; methyl-CpG binding | chr1:7881714-7883644 REVERSEnearly identical (1142) loc\_os09g29750 12009.m06126 protein expressed protein seq=cds; coord=2:188152279..188158014:-1; parent\_gene=GRMZM2G048411'

'nearly identical (1037) AT4G26540 | Symbols: | kinase | chr4:13394673-13398028 REVERSEmoderately similar to ( 338) RPK1\_IPONI Receptor-like protein kinase precursor (EC 2.7.11.1) - Ipomoea nil (Japanese morning glory) (Pharbitis nil)nearly identical (1429) loc\_os09g30190 12009.m06170 protein receptor-like protein kinase precursor, putative, expressed seq=cds; coord=2:189087675..189091198:1; parent\_gene=AC233861.1\_FG001'

'weakly similar to ( 130) AT1G56170 | Symbols: HAP5B, ATHAP5B, NF-YC2 | NF-YC2 (NUCLEAR FACTOR Y, SUBUNIT C2); DNA binding / transcription activator/ transcription factor | chr1:21025118-21025717 FORWARDweakly similar to ( 141) loc\_os09g30310 12009.m06182 protein nuclear transcription factor Y subunit C-2, putative, expressed seq=cds; coord=2:189204687..189208176:-1; parent\_gene=GRMZM2G022162'

'weakly similar to ( 139) loc\_os12g32986 12012.m27011 protein heat shock protein 83, putative, expressed seq=cds; coord=2:189610974..189617149:1; parent\_gene=GRMZM2G474367'

'seq=cds; coord=2:190503989..190505254:-1; parent\_gene=GRMZM2G147955'

'moderately similar to ( 471) AT5G14780 | Symbols: FDH | FDH (FORMATE DEHYDROGENASE); NAD or NADH binding / binding / catalytic/ cofactor binding / oxidoreductase, acting on the CH-OH group of donors, NAD or NADP as acceptor | chr5:4777043-4779190 FORWARDhighly similar to ( 530) FDH1\_ORYSA Formate dehydrogenase 1, mitochondrial precursor (EC 1.2.1.2) (NAD-dependent formate dehydrogenase 1) (FDH 1) - Oryza sativa (Rice)highly similar to ( 530) loc\_os06g29180 12006.m07462 protein formate dehydrogenase 1, mitochondrial precursor, putative, expressed seq=cds; coord=2:211533717..211538264:-1; parent\_gene=GRMZM2G124919'

'weakly similar to ( 104) AT5G58420 | Symbols: | 40S ribosomal protein S4 (RPS4D) | chr5:23619599-23620896 FORWARDweakly similar to ( 110) RS4\_MAIZE 40S ribosomal protein S4 - Zea mays (Maize)weakly similar to ( 110) loc\_os01g25610 12001.m09024 protein 40S ribosomal protein S4, putative, expressed seq=cds; coord=3:6744073..6746491:-1; parent\_gene=GRMZM2G499197'

'highly similar to ( 560) AT1G80360 | Symbols: | aminotransferase class I and II family protein | chr1:30208736-30210643 REVERSEhighly similar to ( 711) loc\_os01g08270 12001.m42887 protein transaminase/ transferase, transferring nitrogenous groups, putative, expressed seq=cds; coord=3:10175360..10222084:1; parent\_gene=GRMZM2G029135'

'highly similar to ( 822) AT1G15460 | Symbols: ATBOR4, BOR4 | BOR4 (REQUIRES HIGH BORON 4); anion exchanger | chr1:5310196-5313376 REVERSEearly identical (1013) loc\_os01g08020 12001.m07427 protein boron transporter-like protein 2, putative, expressed seq=cds; coord=3:10934126..10940345:-1; parent\_gene=GRMZM2G051753'

'moderately similar to ( 273) AT1G44575 | Symbols: NPQ4, PSBS | NPQ4 (NONPHOTOCHEMICAL QUENCHING); chlorophyll binding / xanthophyll binding | chr1:16871768-16872548 FORWARDmoderately similar to ( 286) PSBS\_SPIOL Photosystem II 22 kDa protein, chloroplast precursor (CP22) - Spinacia oleracea (Spinach)moderately similar to ( 305) loc\_os01g64960 12001.m150788 protein photosystem II 22 kDa protein, chloroplast precursor, putative, expressed seq=cds; coord=3:174825201..174827787:-1; parent\_gene=GRMZM2G077333'

'moderately similar to ( 335) AT2G29680 | Symbols: CDC6, ATCDC6 | CDC6 (CELL DIVISION CONTROL 6) | chr2:12689586-12692854 FORWARDhighly similar to ( 549) loc\_os01g63710 12001.m42760 protein cell division control protein 6, putative, expressed seq=cds; coord=3:178059283..178062665:-1; parent\_gene=GRMZM2G007659'

'weakly similar to ( 125) loc\_os01g63160 12001.m12433 protein MYB2, putative, expressed seq=cds; coord=3:179213283..179214280:1; parent\_gene=GRMZM2G005112'

'moderately similar to ( 206) AT1G54290 | Symbols: | eukaryotic translation initiation factor SUI1, putative | chr1:20268710-20269390 REVERSEmoderately similar to ( 214) SUI1\_ORYSA Protein translation factor SUI1 homolog (Protein GOS2) (Translational initiation factor 1) (Protein eIF1) - Oryza sativa (Rice)moderately similar to ( 228) loc\_os01g58220 12001.m11966 protein protein translation factor SUI1 homolog 2, putative, expressed seq=cds; coord=3:189344756..189347802:1; parent\_gene=GRMZM2G113414'

'weakly similar to ( 128) loc\_os04g11450 12004.m35049 protein F-box domain containing protein, expressed seq=cds; coord=3:210065350..210067453:1; parent\_gene=GRMZM2G059799'

'weakly similar to ( 163) AT5G55340 | Symbols: | long-chain-alcohol O-fatty-acyltransferase family protein / wax synthase family protein | chr5:22439985-22440986 REVERSEmoderately similar to ( 475) loc\_os01g46270 12001.m10825 protein wax synthase isoform 3, putative, expressed seq=cds; coord=3:213797343..213799289:-1; parent\_gene=GRMZM2G349407'

'weakly similar to ( 163) AT5G55340 | Symbols: | long-chain-alcohol O-fatty-acyltransferase family protein / wax synthase family protein | chr5:22439985-22440986 REVERSEmoderately similar to ( 475) loc\_os01g46270 12001.m10825 protein wax synthase isoform 3, putative, expressed seq=cds; coord=3:213797343..213799289:-1; parent\_gene=GRMZM2G349407'

'highly similar to ( 538) AT4G16745 | Symbols: | exostosin family protein | chr4:9412185-9414053 FORWARDhighly similar to ( 709) loc\_os01g45350 12001.m10738 protein limonene cyclase like protein, putative, expressed seq=cds; coord=3:215380332..215382314:-1; parent\_gene=GRMZM2G048010'

'moderately similar to ( 241) AT5G14740 | Symbols: CA2, CA18, BETA CA2 | CA2 (CARBONIC ANHYDRASE 2); carbonate dehydratase/ zinc ion binding | chr5:4758257-4762315 FORWARDmoderately similar to ( 340) CAHC\_HORVU Carbonic anhydrase, chloroplast precursor (EC 4.2.1.1) (Carbonate dehydratase) - Hordeum vulgare (Barley)moderately similar to ( 341) loc\_os01g45274 12001.m150428 protein carbonic anhydrase, chloroplast precursor, putative, expressed seq=cds; coord=3:215431519..215437533:-1; parent\_gene=GRMZM2G348512'

'weakly similar to ( 119) AT1G52150 | Symbols: ATHB-15, ATHB15, CNA, ICU4 | ATHB-15; DNA binding / transcription factor | chr1:19410118-19413961 REVERSEmoderately similar to ( 210) loc\_os03g01890 12003.m34764 protein rolled leaf1, putative, expressed seq=cds; coord=4:31771798..31787581:1; parent\_gene=GRMZM2G048297'

'weakly similar to ( 105) AT5G22740 | Symbols: ATCSLA02, CSLA02, ATCSLA2 | ATCSLA02; mannan synthase/ transferase, transferring glycosyl groups | chr5:7555379-7559866 REVERSEweakly similar to ( 152) loc\_os08g33740 12008.m07364 protein CSLA11 - cellulose synthase-like family A, expressed seq=cds; coord=4:83323033..83326629:-1; parent\_gene=GRMZM2G093999'

'highly similar to ( 714) AT2G06510 | Symbols: ATRPA1A, RPA1A, RPA70A, ATRPA70A | RPA1A (REPLICATION PROTEIN A 1A); DNA binding / nucleic acid binding | chr2:2585215-2587601 FORWARDhighly similar to ( 938) loc\_os02g53680 12002.m10397 protein replication protein A 70 kDa DNA-binding subunit, putative, expressed seq=cds; coord=4:177148507..177152445:1; parent\_gene=GRMZM2G115013'

'highly similar to ( 917) AT2G32950 | Symbols: COP1, ATCOP1, DET340, FUS1, EMB168 | COP1 (CONSTITUTIVE PHOTOMORPHOGENIC 1); protein binding / ubiquitin-protein ligase | chr2:13978000-13983282 FORWARDhighly similar to ( 879) COP1\_PEA E3 ubiquitin ligase protein COP1 (EC 6.3.2.-) (Constitutive photomorphogenesis protein 1) - Pisum sativum (Garden pea)nearly identical (1137) loc\_os02g53140 12002.m10343 protein ubiquitin ligase protein COP1, putative, expressed seq=cds; coord=4:177646925..177653783:1; parent\_gene=GRMZM2G126795'

'nearly identical (1232) AT1G77760 | Symbols: NIA1, GNR1, NR1 | NIA1 (NITRATE REDUCTASE 1); nitrate reductase | chr1:29236005-29239367 REVERSEnearly identical (1540) NIA7\_HORVU Nitrate reductase [NAD(P)H] (EC 1.7.1.2) - Hordeum vulgare (Barley)nearly identical (1573) loc\_os02g53130 12002.m10342 protein nitrate reductase, putative, expressed seq=cds; coord=4:177655913..177659763:1; parent\_gene=GRMZM2G428027'

'moderately similar to ( 343) AT4G08500 | Symbols: MEKK1, ATMEKK1, MAPKKK8, ARAKIN | MEKK1 (MAP KINASE KINASE KINASE 1); DNA binding / MAP kinase kinase kinase/ kinase/ kinase binding / protein binding | chr4:5404272-5407062 REVERSEweakly similar to ( 117) M2K1\_ORYSA Mitogen-activated protein kinase kinase 1 (EC 2.7.12.2) (MAP kinase kinase 1) (MAPKK1) (OsMEK1) - Oryza sativa (Rice)moderately similar to ( 393) loc\_os03g15570 12003.m06994 protein mitogen-activated protein kinase 1, putative, expressed seq=cds; coord=4:178052009..178063510:-1; parent\_gene=GRMZM2G158860'

'weakly similar to ( 124) loc\_os10g24954 12010.m05448 protein ulp1 protease family, C-terminal catalytic domain containing protein seq=cds; coord=4:178285833..178288003:-1; parent\_gene=GRMZM2G150153'  
'nearly identical (1118) AT4G16130 | Symbols: ARA1, ISA1, ATISA1 | ARA1 (ARABINOSE KINASE); ATP binding / L-arabinokinase/ galactokinase | chr4:9120875-9127656 FORWARDnearly identical (1404) loc\_os02g04840 12002.m05832 protein ARA1, putative, expressed seq=cds; coord=4:237704209..237711241:1; parent\_gene=GRMZM2G165931'

'highly similar to ( 557) AT2G47070 | Symbols: SPL1 | SPL1 (SQUAMOSA PROMOTER BINDING PROTEIN-LIKE 1); DNA binding / transcription factor | chr2:19337144-19340552 FORWARDvery weakly similar to (97.8) LG1\_MAIZE LIGULELESS1 protein - Zea mays (Maize)nearly identical (1281) loc\_os03g61760 12003.m11057 protein squamosa promoter-binding-like protein 12, putative, expressed seq=cds; coord=5:1845813..1852802:-1; parent\_gene=GRMZM2G138421'

'highly similar to ( 525) AT4G30560 | Symbols: ATCNGC9, CNGC9 | ATCNGC9 (CYCLIC NUCLEOTIDE GATED CHANNEL 9); calmodulin binding / cyclic nucleotide binding / ion channel | chr4:14926974-14929681 REVERSEhighly similar to ( 652) loc\_os03g44440 12003.m09483 protein cyclic nucleotide-gated ion channel 9, putative, expressed seq=cds; coord=5:16837450..16840121:-1; parent\_gene=GRMZM2G077828'  
'moderately similar to ( 209) AT1G13690 | Symbols: ATE1 | ATE1; nucleic acid binding / nucleotide binding | chr1:4693380-4694179 FORWARDmoderately similar to ( 256) loc\_os03g40310 12003.m09113 protein peptidyl-prolyl cis-trans isomerase E, putative, expressed seq=cds; coord=5:18753627..18756558:1; parent\_gene=GRMZM2G138572'

'moderately similar to ( 334) AT1G61250 | Symbols: SC3 | SC3 (SECRETORY CARRIER 3); transmembrane transporter | chr1:22586035-22588664 FORWARDmoderately similar to ( 493) loc\_os03g38590 12003.m101386 protein SC3 protein, putative, expressed seq=cds; coord=5:19677495..19681425:-1; parent\_gene=GRMZM2G124918'

'moderately similar to ( 270) AT1G55520 | Symbols: TBP2, ATTBP2 | TBP2 (TATA BINDING PROTEIN 2); DNA binding / RNA polymerase II transcription factor/ TATA-binding protein binding | chr1:20726150-20727483 REVERSEmoderately similar to ( 276) TBP\_MESCR TATA-box-binding protein (TATA-box factor) (TATA-binding factor) (TATA sequence-binding protein) (TBP) (Transcription initiation factor TFIID TBP subunit) - Mesembryanthemum crystallinum (Common ice plant)moderately similar to ( 275) loc\_os03g45410 12003.m09569 protein TATA-binding protein 2, putative, expressed seq=cds; coord=5:22291112..22293070:-1; parent\_gene=GRMZM2G466938'

'moderately similar to ( 459) AT3G51120 | Symbols: | DNA binding / nucleic acid binding / protein binding / zinc ion binding | chr3:18986026-18991886 REVERSEnearly identical (1229) loc\_os10g36810 12010.m06486 protein plus-3 domain containing protein, expressed seq=cds; coord=5:22737810..22750836:-1; parent\_gene=GRMZM2G078379'

'highly similar to ( 576) AT4G21390 | Symbols: B120 | B120; ATP binding / protein kinase/ protein serine/threonine kinase/ sugar binding | chr4:11394458-11397474 REVERSEmoderately similar to ( 271) KPRO\_MAIZE Putative receptor protein kinase ZmPK1 precursor (EC 2.7.11.1) - Zea mays (Maize)highly similar to ( 927) loc\_os08g08140 12008.m04949 protein receptor-like kinase, putative, expressed seq=cds; coord=5:23021471..23025066:1; parent\_gene=GRMZM2G330751'

'highly similar to ( 670) AT5G23190 | Symbols: CYP86B1 | CYP86B1; electron carrier/ heme binding / iron ion binding / monooxygenase/ oxygen binding | chr5:7803478-7805659 REVERSEweakly similar to ( 114) C97B2\_SOYBN Cytochrome P450 97B2 (EC 1.14.-.-) - Glycine max (Soybean)highly similar to ( 830) loc\_os10g34480 12010.m06272 protein cytochrome P450 86A2, putative, expressed seq=cds; coord=5:26443691..26446113:1; parent\_gene=GRMZM2G013082'

'highly similar to ( 664) AT4G30080 | Symbols: ARF16 | ARF16 (AUXIN RESPONSE FACTOR 16); miRNA binding / transcription factor | chr4:14703369-14705564 REVERSEhighly similar to ( 977) loc\_os10g33940 12010.m06222 protein auxin response factor 16, putative, expressed seq=cds; coord=5:27944757..27949513:-1; parent\_gene=GRMZM2G159399'

'highly similar to ( 790) AT1G73590 | Symbols: PIN1, ATPIN1 | PIN1 (PIN-FORMED 1); transporter | chr1:27659772-27662876 FORWARDnearly identical (1019) PIN1\_ORYSA Auxin efflux carrier component 1 (OsPIN1) (Ethylene insensitive root 1 homolog) - Oryza sativa (Rice)nearly identical (1019) loc\_os02g50960 12002.m33866 protein auxin efflux carrier component 1, putative, expressed seq=cds; coord=5:206727149..206730565:1; parent\_gene=GRMZM2G074267'

'moderately similar to ( 213) AT5G37810 | Symbols: NIP4;1, NLM4 | NIP4;1 (NOD26-LIKE INTRINSIC PROTEIN 4;1); water channel | chr5:15045232-15047807 FORWARDmoderately similar to ( 473) LSII\_ORYSA Silicon transporter LSII (Low silicon protein 1) - Oryza sativa (Rice)moderately similar to ( 473) loc\_os02g51110 12002.m10145 protein aquaporin NIP4.2, putative, expressed seq=cds; coord=5:206922588..206926444:1; parent\_gene=GRMZM2G028325'

'very weakly similar to ( 100) AT1G26945 | Symbols: KDR | KDR (KIDARI); transcription regulator | chr1:9351571-9352474 FORWARDweakly similar to ( 155) loc\_os02g51320 12002.m10166 protein DNA binding protein, putative, expressed seq=cds; coord=5:207504983..207506597:-1; parent\_gene=GRMZM2G036092'

'highly similar to ( 908) AT1G78060 | Symbols: | glycosyl hydrolase family 3 protein | chr1:29349796-29352868 REVERSEmoderately similar to ( 376) XYNB\_PRUPE Putative beta-D-xylosidase (EC 3.2.1.-) (PpAz152) (Fragment) - Prunus persica (Peach)nearly identical (1285) loc\_os02g51620 12002.m10194 protein beta-D-xylosidase, putative, expressed seq=cds; coord=5:208090222..208094428:-1; parent\_gene=GRMZM2G035503'

'weakly similar to ( 132) AT1G78080 | Symbols: RAP2.4 | RAP2.4 (related to AP2 4); DNA binding / transcription factor | chr1:29364790-29365794 FORWARDmoderately similar to ( 202) loc\_os02g51670 12002.m10198 protein AP2 domain-containing protein, putative, expressed seq=cds; coord=5:208162767..208165707:1; parent\_gene=GRMZM2G055204'

'weakly similar to ( 109) AT2G14210 | Symbols: ANR1, AGL44 | AGL44 (AGAMOUS-LIKE 44); DNA binding / transcription factor | chr2:6018841-6023585 FORWARDweakly similar to ( 112) MAD57\_ORYSA MADS-box transcription factor 57 (OsMADS57) - Oryza sativa (Rice)weakly similar to ( 112) loc\_os02g49840 12002.m33858 protein MADS-box transcription factor 57, putative, expressed seq=cds; coord=5:204742401..204743090:-1; parent\_gene=GRMZM2G044408'

'weakly similar to ( 109) AT4G10170 | Symbols: | synaptobrevin-related family protein | chr4:6344587-6345351 FORWARDmoderately similar to ( 257) loc\_os08g01880 12008.m04336 protein expressed protein seq=cds; coord=6:2721360..2722825:-1; parent\_gene=GRMZM2G367941'

'moderately similar to ( 420) AT1G12420 | Symbols: ACR8 | ACR8; amino acid binding | chr1:4226673-4228917 REVERSEhighly similar to ( 526) loc\_os08g02500 12008.m04394 protein ACR8, putative seq=cds; coord=6:5641494..5643748:1; parent\_gene=GRMZM2G034404'

'weakly similar to ( 107) AT3G14250 | Symbols: | protein binding / zinc ion binding | chr3:4745963-4746958 REVERSEweakly similar to ( 193) loc\_os09g25190 12009.m05671 protein ubiquitin-protein ligase/ zinc ion binding protein, putative, expressed seq=cds; coord=6:6700670..6701561:1; parent\_gene=GRMZM2G390009'

'highly similar to ( 591) AT5G08560 | Symbols: | transducin family protein / WD-40 repeat family protein | chr5:2771104-2773827 REVERSEhighly similar to ( 850) loc\_os02g19210 12002.m07164 protein WD-repeat protein 26, putative, expressed seq=cds; coord=6:8380046..8392601:1; parent\_gene=GRMZM2G061186'

'moderately similar to ( 302) AT1G11330 | Symbols: | S-locus lectin protein kinase family protein | chr1:3810372-3813416 FORWARDweakly similar to ( 196) SLSG6\_BRAOL S-locus-specific glycoprotein S6 precursor (SLSG-6) - Brassica oleracea (Wild cabbage)highly similar to ( 592) loc\_os04g53994 12004.m10292 protein ATP binding protein, putative, expressed seq=cds; coord=6:24742749..24748211:1; parent\_gene=GRMZM2G160853'

'weakly similar to ( 197) AT1G69010 | Symbols: BIM2 | BIM2 (BES1-interacting Myc-like protein 2); DNA binding / transcription factor | chr1:25941804-25943599 FORWARDhighly similar to ( 568) loc\_os09g29930 12009.m060079 protein transcription factor BIM2, putative, expressed seq=cds; coord=7:130237175..130244865:1; parent\_gene=GRMZM2G089501'

'weakly similar to ( 134) AT5G26330 | Symbols: | plastocyanin-like domain-containing protein / mavecyanin, putative | chr5:9241614-9242635 REVERSEvery weakly similar to (97.8) BCP\_PEA Blue copper protein precursor - Pisum sativum (Garden pea)weakly similar to ( 157) loc\_os07g38290 12007.m08076 protein copper ion binding protein, putative, expressed seq=cds; coord=7:159130478..159136959:-1; parent\_gene=GRMZM2G107562'

'weakly similar to ( 199) AT5G67590 | Symbols: FRO1 | FRO1 (FROSTBITE1); NADH dehydrogenase (ubiquinone) | chr5:26958073-26959356 FORWARDmoderately similar to ( 299) loc\_os07g39710 12007.m08213 protein NADH-ubiquinone oxidoreductase 18 kDa subunit, mitochondrial precursor, putative, expressed seq=cds; coord=7:161685025..161693219:-1; parent\_gene=GRMZM2G396397'

'weakly similar to ( 149) AT5G50890 | Symbols: | LOCATED IN: cellular\_component unknown; EXPRESSED IN: 17 plant structures; EXPRESSED DURING: 13 growth stages; BEST Arabidopsis thaliana protein match is: lipase class 3 family protein (TAIR:AT2G05260.1); Has 115 Blast hits to 115 proteins in 7 species: Archae - 0; Bacteria - 0; Metazoa - 0; Fungi - 0; Plants - 115; Viruses - 0; Other Eukaryotes - 0 (source: NCBI BLINK). | chr5:20702684-20704235 FORWARDmoderately similar to ( 313) loc\_os07g39810 12007.m08223 protein triacylglycerol lipase, putative, expressed seq=cds; coord=7:161804206..161805610:-1; parent\_gene=GRMZM2G179777'

'moderately similar to ( 302) AT5G55600 | Symbols: | agenet domain-containing protein / bromo-adjacent homology (BAH) domain-containing protein | chr5:22522232-22524796 REVERSEhighly similar to ( 632) loc\_os07g41640 12007.m29252 protein DNA binding protein, putative, expressed seq=cds; coord=7:164824657..164829482:1; parent\_gene=GRMZM2G037444'

'very weakly similar to (83.2) loc\_os08g23360 12008.m26659 protein signal recognition particle 68 kDa protein, putative, expressed seq=cds; coord=7:165096869..165097450:1; parent\_gene=GRMZM2G121022'

'very weakly similar to (83.2) loc\_os08g23360 12008.m26659 protein signal recognition particle 68 kDa protein, putative, expressed seq=cds; coord=7:165096869..165097450:1; parent\_gene=GRMZM2G121022'

'moderately similar to ( 217) AT4G33160 | Symbols: | ubiquitin-protein ligase | chr4:15994160-15995533 FORWARDmoderately similar to ( 405) loc\_os07g42590 12007.m08491 protein F-box protein, putative, expressed seq=cds; coord=7:165744759..165746434:1; parent\_gene=GRMZM2G054032'

'nearly identical (1117) AT4G35790 | Symbols: ATPLDDELTA, PLDDELTA | ATPLDDELTA; phospholipase D | chr4:16955774-16959875 REVERSEhighly similar to ( 676) PLDA1\_VIGUN Phospholipase D alpha 1 (EC 3.1.4.4) (PLD alpha 1) (Choline phosphatase 1) (Phosphatidylcholine-hydrolyzing phospholipase D 1) - Vigna unguiculata (Cowpea)nearly identical (1469) loc\_os09g37100 12009.m06658 protein phospholipase D delta, putative, expressed seq=cds; coord=7:175180156..175187596:-1; parent\_gene=GRMZM2G140811'

'weakly similar to ( 190) AT5G56340 | Symbols: ATCRT1 | zinc finger (C3HC4-type RING finger) family protein | chr5:22818254-22819444 FORWARDmoderately similar to ( 243) loc\_os01g16950 12001.m08291 protein protein binding protein, putative, expressed seq=cds; coord=8:2079198..2081568:-1; parent\_gene=GRMZM2G417125'

'weakly similar to ( 169) AT1G44970 | Symbols: | peroxidase, putative | chr1:17002237-17003563 FORWARDweakly similar to ( 131) PER1\_ARAHY Cationic peroxidase 1 precursor (EC 1.11.1.7) (PNPC1) - Arachis hypogaea (Peanut)moderately similar to ( 205) loc\_os01g15810 12001.m08179 protein peroxidase 9 precursor, putative, expressed seq=cds; coord=8:4359928..4360529:1; parent\_gene=GRMZM2G037156'

'moderately similar to ( 306) AT5G46860 | Symbols: VAM3, ATVAM3, SYP22, ATSYP22, SGR3 | VAM3; SNAP receptor | chr5:19012342-19013795 REVERSEmoderately similar to ( 402) loc\_os01g15110 12001.m08110 protein syntaxin 23, putative, expressed seq=cds; coord=8:5315352..5319733:1; parent\_gene=GRMZM2G017329'

'highly similar to ( 555) AT1G24190 | Symbols: SIN3, ATSIN3, SNL3 | SNL3 (SIN3-LIKE 3); transcription repressor | chr1:8563858-8569996 REVERSEnearly identical (1498) loc\_os01g01960 12001.m06838 protein paired amphipathic helix repeat family protein, expressed seq=cds; coord=8:8119203..8129694:-1; parent\_gene=GRMZM2G334457'



'moderately similar to ( 249) AT1G70060 | Symbols: SNL4 | SNL4 (SIN3-LIKE 4) | chr1:26383789-26389568 FORWARDmoderately similar to ( 338) loc\_os01g01960 12001.m06838 protein paired amphipathic helix repeat family protein, expressed seq=cds; coord=8:8136058..8139636:-1; parent\_gene=AC234160.1\_FG001'

'weakly similar to ( 168) AT1G65620 | Symbols: AS2 | AS2 (ASYMMETRIC LEAVES 2); protein binding | chr1:24400146-24400745 FORWARDmoderately similar to ( 212) loc\_os01g66590 12001.m97474 protein ASYMMETRIC LEAVES2, putative, expressed seq=cds; coord=8:104267219..104268277:1; parent\_gene=GRMZM2G096064'

'highly similar to ( 697) AT1G03380 | Symbols: ATATG18G | AtATG18g | chr1:836155-840362 FORWARDweakly similar to ( 160) ATPG\_MAIZE ATP synthase subunit gamma, chloroplast precursor (EC 3.6.3.14) [Contains: Inceptin] - Zea mays (Maize)nearly identical (1384) loc\_os05g33610 12005.m083719 protein expressed protein seq=cds; coord=8:106939155..106998860:-1; parent\_gene=GRMZM2G078468'

'weakly similar to ( 117) AT4G23810 | Symbols: WRKY53, ATWRKY53 | WRKY53; DNA binding / protein binding / transcription activator/ transcription factor | chr4:12392666-12393739 REVERSEmoderately similar to ( 251) loc\_os09g16510 12009.m04911 protein OsWRKY74 - Superfamily of rice TFs having WRKY and zinc finger domains, expressed seq=cds; coord=8:109566616..109568284:-1; parent\_gene=GRMZM2G061408'

'moderately similar to ( 246) AT3G07880 | Symbols: | Rho GDP-dissociation inhibitor family protein | chr3:2514175-2515544 FORWARDmoderately similar to ( 345) loc\_os01g68540 12001.m12957 protein rho GDP-dissociation inhibitor 1, putative, expressed seq=cds; coord=8:110142652..110144824:1; parent\_gene=GRMZM2G150724'

'weakly similar to ( 166) AT5G53190 | Symbols: | nodulin MtN3 family protein | chr5:21572417-21574284 REVERSEmoderately similar to ( 253) loc\_os05g12320 12005.m05698 protein mtN3 protein-like, putative, expressed seq=cds; coord=8:112530662..112532375:1; parent\_gene=GRMZM2G179679'

'weakly similar to ( 140) AT1G65810 | Symbols: | tRNA-splicing endonuclease positive effector-related | chr1:24477043-24480728 REVERSEmoderately similar to ( 206) loc\_os01g12530 12001.m150511 protein smr domain containing protein, expressed seq=cds; coord=8:118394306..118400023:1; parent\_gene=GRMZM2G162112'

'highly similar to ( 803) AT2G13620 | Symbols: ATCHX15, CHX15 | ATCHX15; monovalent cation:proton antiporter/ sodium:hydrogen antiporter | chr2:5678006-5680621 FORWARDnearly identical (1224) loc\_os05g40650 12005.m08241 protein ATCHX15, putative, expressed seq=cds; coord=8:119266312..119269960:-1; parent\_gene=GRMZM2G138817'

'very weakly similar to (84.7) AT1G02900 | Symbols: RALFL1, RALF1, ATRALF1 | RALF1 (RAPID ALKALINIZATION FACTOR 1); signal transducer | chr1:653976-654338 REVERSEweakly similar to ( 103) loc\_os01g70690 12001.m13115 protein RALFL33, putative seq=cds; coord=8:159709814..159710550:1; parent\_gene=GRMZM2G423959'

'highly similar to ( 789) AT5G23670 | Symbols: LCB2 | LCB2; protein binding / serine C-palmitoyltransferase | chr5:7981889-7985037 FORWARDhighly similar to ( 915) loc\_os01g70380 12001.m13086 protein serine palmitoyltransferase 2, putative, expressed seq=cds; coord=8:159979988..159983916:1; parent\_gene=GRMZM2G010202'

'weakly similar to ( 124) loc\_os11g15570 12011.m05691 protein expressed protein seq=cds; coord=8:161171663..161174060:-1; parent\_gene=GRMZM2G364863'

'weakly similar to ( 124) loc\_os11g15570 12011.m05691 protein expressed protein seq=cds; coord=8:161171663..161174060:-1; parent\_gene=GRMZM2G364863'

'moderately similar to ( 356) AT1G05800 | Symbols: DGL | DGL (DONGLE); triacylglycerol lipase | chr1:1741204-1742619 FORWARDmoderately similar to ( 436) loc\_os01g67430 12001.m12847 protein triacylglycerol lipase, putative, expressed seq=cds; coord=8:163911970..163913352:-1; parent\_gene=AC233916.1\_FG002'

'very weakly similar to (88.2) loc\_os06g08564 12006.m91824 protein hydrophobic protein LTI6B, putative, expressed seq=cds; coord=9:12870907..12878495:-1; parent\_gene=GRMZM2G079306'

'moderately similar to ( 362) AT5G61520 | Symbols: | hexose transporter, putative | chr5:24739358-24740833 REVERSEmoderately similar to ( 432) HEX6\_RICCO Hexose carrier protein HEX6 - Ricinus communis (Castor bean)highly similar to ( 507) loc\_os06g04900 12006.m05219 protein hexose carrier protein HEX6, putative, expressed seq=cds; coord=9:20747007..20749031:1; parent\_gene=GRMZM2G404965'

'weakly similar to ( 152) AT2G44910 | Symbols: ATHB4, ATHB-4 | ATHB4 (ARABIDOPSIS THALIANA HOMEBOX-LEUCINE ZIPPER PROTEIN 4); DNA binding / transcription factor | chr2:18517887-18519525 REVERSEmoderately similar to ( 243) loc\_os06g04870 12006.m05216 protein homeobox-leucine zipper protein HAT1, putative, expressed seq=cds; coord=9:20827855..20829629:-1; parent\_gene=GRMZM2G134260'

'moderately similar to ( 284) AT4G31300 | Symbols: PBA1 | PBA1; endopeptidase/ peptidase/ threonine-type endopeptidase | chr4:15188927-15190935 FORWARDmoderately similar to ( 274) PSB6\_TOBAC Proteasome subunit beta type 6 precursor (EC 3.4.25.1) (Proteasome delta chain) (Tobacco cryptogein-induced protein 7) (tcI 7) - Nicotiana tabacum (Common tobacco)moderately similar to ( 335) loc\_os06g04800 12006.m05209 protein proteasome subunit beta type 6 precursor, putative, expressed seq=cds; coord=9:20969486..20973151:1; parent\_gene=GRMZM2G374881'

'highly similar to ( 679) AT5G35930 | Symbols: | AMP-dependent synthetase and ligase family protein | chr5:14067197-14074404 REVERSEnearly identical (1253) loc\_os06g02160 12006.m091577 protein AMP-binding enzyme family protein, expressed seq=cds; coord=9:26478641..26484651:1; parent\_gene=GRMZM2G393146'

'highly similar to ( 619) AT1G68940 | Symbols: | armadillo/beta-catenin repeat protein-related / U-box domain-containing protein | chr1:25921453-25925374 REVERSEnearly identical (1451) loc\_os06g16410 12006.m06354 protein ubiquitin-protein ligase, putative, expressed seq=cds; coord=9:34703357..34723384:-1; parent\_gene=GRMZM2G065612'

'weakly similar to ( 190) AT1G65680 | Symbols: ATEXPB2, EXPB2, ATHEXP BETA 1.4 | ATEXPB2 (ARABIDOPSIS THALIANA EXPANSIN B2) | chr1:24427266-24428399 FORWARDmoderately similar to ( 332) EXPB6\_ORYSA Expansin-B6 precursor (OsEXPB6) (Beta-expansin-6) (OsaEXPb1.8) - Oryza sativa (Rice)moderately similar to ( 332) loc\_os10g40700 12010.m06838 protein beta-expansin 1a precursor, putative, expressed seq=cds; coord=9:116443796..116445318:1; parent\_gene=GRMZM2G059785'

'moderately similar to ( 299) AT3G47590 | Symbols: | esterase/lipase/thioesterase family protein | chr3:17536133-17537515 REVERSEmoderately similar to ( 311) loc\_os01g39790 12001.m43070 protein esterase, putative, expressed seq=cds; coord=9:148668289..148672816:1; parent\_gene=GRMZM2G017957'

'moderately similar to ( 308) AT5G55530 | Symbols: | C2 domain-containing protein | chr5:22494439-22495656 FORWARDmoderately similar to ( 489) loc\_os03g09840 12003.m35067 protein C2 domain containing protein, expressed seq=cds; coord=9:149059296..149062459:1; parent\_gene=GRMZM2G096355'

'highly similar to ( 973) AT1G80680 | Symbols: SAR3, MOS3, PRE, NUP96 | SAR3 (SUPPRESSOR OF AUXIN RESISTANCE 3); porin | chr1:30324219-30328489 FORWARDnearly identical (1486) loc\_os03g07580 12003.m06270 protein PRE, putative, expressed seq=cds; coord=9:151118220..151121978:-1; parent\_gene=AC149829.2\_FG003'

'moderately similar to ( 296) AT3G08740 | Symbols: | elongation factor P (EF-P) family protein | chr3:2654788-2656154 REVERSEmoderately similar to ( 358) loc\_os12g02380 12012.m04239 protein elongation factor P, putative, expressed seq=cds; coord=10:4071331..4073937:-1; parent\_gene=GRMZM2G129804'

'weakly similar to ( 176) AT4G10250 | Symbols: ATHSP22.0 | ATHSP22.0 | chr4:6370537-6371124 FORWARDweakly similar to ( 185) HSP41\_SOYBN 22.0 kDa class IV heat shock protein precursor - Glycine max (Soybean)moderately similar to ( 227) loc\_os04g36750 12004.m08715 protein 22.0 kDa class IV heat shock protein precursor, putative, expressed seq=cds; coord=10:119759011..119760065:1; parent\_gene=GRMZM2G346839'

'nearly identical (1382) AT1G48410 | Symbols: AGO1 | AGO1 (ARGONAUTE 1); endoribonuclease/ miRNA binding / protein binding / siRNA binding | chr1:17886285-17891892 REVERSEnearly identical (1631) loc\_os04g47870 12004.m09728 protein PINHEAD protein, putative, expressed seq=cds; coord=10:137481424..137487962:1; parent\_gene=AC209206.3\_FG011'

'weakly similar to ( 132) AT3G13960 | Symbols: AtGRF5 | AtGRF5 (GROWTH-REGULATING FACTOR 5); transcription activator | chr3:4608526-4610160 FORWARDmoderately similar to ( 404) loc\_os04g51190 12004.m10015 protein growth-regulating factor, putative, expressed seq=cds; coord=10:140968794..140972587:-1; parent\_gene=GRMZM2G129147'

'moderately similar to ( 449) AT2G05940 | Symbols: | protein kinase, putative | chr2:2287514-2289270 REVERSEmoderately similar to ( 213) NORK\_PEA Nodulation receptor kinase precursor (EC 2.7.11.1) - Pisum sativum (Garden pea)highly similar to ( 564) loc\_os03g08170 12003.m06326 protein protein kinase APK1B, chloroplast precursor, putative, expressed seq=cds; coord=1:16468414..16473940:1; parent\_gene=GRMZM2G175164'

'weakly similar to ( 143) loc\_os03g08330 12003.m06342 protein ZIM motif family protein, expressed seq=cds; coord=1:16792359..16793281:1; parent\_gene=GRMZM2G445634'

'moderately similar to ( 382) AT1G72370 | Symbols: P40, AP40, RP40, RPSAA | P40; structural constituent of ribosome | chr1:27243148-27244842 REVERSEmoderately similar to ( 406) RSSA\_SOYBN 40S ribosomal protein SA (p40) - Glycine max (Soybean)moderately similar to ( 477) loc\_os03g08440 12003.m35048 protein 40S ribosomal protein SA, putative, expressed seq=cds; coord=1:17325366..17335709:-1; parent\_gene=GRMZM2G145308'

'highly similar to ( 512) AT1G74910 | Symbols: | ADP-glucose pyrophosphorylase family protein | chr1:28135770-28138456 REVERSEhighly similar to ( 603) loc\_os03g11050 12003.m35086 protein mannose-1-phosphate guanyltransferase, putative, expressed seq=cds; coord=1:21196693..21221560:1; parent\_gene=GRMZM2G064841'

'seq=cds; coord=1:21678945..21680766:-1; parent\_gene=GRMZM2G415251'

'moderately similar to ( 229) AT4G37580 | Symbols: HLS1, COP3, UNS2 | HLS1 (HOOKLESS 1); N-acetyltransferase | chr4:17658932-17660564 FORWARDmoderately similar to ( 366) loc\_os03g10810 12003.m35083 protein HLS1, putative, expressed seq=cds; coord=1:21720856..21722289:1; parent\_gene=GRMZM2G114184'

'highly similar to ( 743) AT4G29040 | Symbols: RPT2a | RPT2a (regulatory particle AAA-ATPase 2a); ATPase | chr4:14312369-14314386 FORWARDhighly similar to ( 783) PRS4\_ORYSA 26S protease regulatory subunit 4 homolog (TAT-binding protein homolog 2) - Oryza sativa (Rice)highly similar to ( 794) loc\_os03g18690 12003.m07290 protein 26S protease regulatory subunit 4, putative, expressed seq=cds; coord=1:46542947..46546531:1; parent\_gene=GRMZM2G104373'

'weakly similar to ( 198) AT2G38440 | Symbols: ITB1, SCAR2, DIS3, WAVE4, ATSCAR2 | SCAR2 (SCAR HOMOLOG 2) | chr2:16095550-16100851 FORWARDweakly similar to ( 192) SCRL1\_ORYSA SCAR-like protein 1 - Oryza sativa (Rice)highly similar to ( 598) loc\_os03g18710 12003.m07292 protein expressed protein seq=cds; coord=1:46576198..46582130:-1; parent\_gene=GRMZM2G104534'

'moderately similar to ( 346) AT4G02100 | Symbols: | DNAJ heat shock N-terminal domain-containing protein | chr4:930228-932049 FORWARDhighly similar to ( 670) loc\_os03g19200 12003.m07337 protein heat shock protein binding protein, putative, expressed seq=cds; coord=1:48553016..48556046:-1; parent\_gene=GRMZM2G010000'

'very weakly similar to (80.1) AT4G01940 | Symbols: NFU1, AtCNFU1 | NFU1; structural molecule | chr4:842265-843388 REVERSEweakly similar to ( 127) loc\_os03g20010 12003.m07414 protein NFU3, putative, expressed seq=cds; coord=1:51291271..51292601:1; parent\_gene=GRMZM2G084783'

'highly similar to ( 691) AT1G56560 | Symbols: | beta-fructofuranosidase, putative / invertase, putative / saccharase, putative / beta-fructosidase, putative | chr1:21192593-21194948 FORWARDhighly similar to ( 795) loc\_os03g20020 12003.m07415 protein beta-fructofuranosidase, putative, expressed seq=cds; coord=1:51318993..51329214:-1; parent\_gene=GRMZM2G084940'

'moderately similar to ( 262) AT1G08845 | Symbols: | structural constituent of ribosome | chr1:2838789-2840955 FORWARDmoderately similar to ( 334) loc\_os10g41050 12010.m06870 protein expressed protein seq=cds; coord=1:90225656..90230346:-1; parent\_gene=GRMZM2G154487'

'weakly similar to ( 187) AT5G23370 | Symbols: | GRAM domain-containing protein / ABA-responsive protein-related | chr5:7863542-7864201 REVERSEmoderately similar to ( 335) loc\_os10g34730 12010.m06300 protein FIP1, putative, expressed seq=cds; coord=1:229187112..229188270:1; parent\_gene=GRMZM2G113167'

'moderately similar to ( 401) AT3G63440 | Symbols: ATCKX6, CKX6, ATCKX7 | CKX6 (CYTOKININ OXIDASE/DEHYDROGENASE 6); cytokinin dehydrogenase | chr3:23424291-23426265 FORWARDmoderately similar to ( 321) CKX1\_MAIZE Cytokinin dehydrogenase 1 precursor (EC 1.5.99.12) (Cytokinin oxidase 1) (CKO 1) (COX 1) (ZmCKX1) - Zea mays (Maize)highly similar to ( 789) loc\_os10g34230 12010.m06250 protein cytokinin dehydrogenase 5 precursor, putative, expressed seq=cds; coord=1:230012438..230016000:-1; parent\_gene=GRMZM2G404443'

'moderately similar to ( 462) AT3G29090 | Symbols: PME31, ATPME31 | pectinesterase family protein | chr3:11073804-11075335 FORWARDweakly similar to ( 165) PME1\_CITSI Pectinesterase-I precursor (EC 3.1.1.11) (Pectin methylesterase) (PE) - Citrus sinensis (Sweet orange)highly similar to ( 558) loc\_os10g26680 12010.m21883 protein pectinesterase-I precursor, putative, expressed seq=cds; coord=1:242432528..242434998:1; parent\_gene=GRMZM2G019411'

'highly similar to ( 659) AT4G13420 | Symbols: HAK5, ATHAK5 | HAK5 (HIGH AFFINITY K

'highly similar to ( 632) AT4G13420 | Symbols: HAK5, ATHAK5 | HAK5 (HIGH AFFINITY K

'moderately similar to ( 474) AT3G26590 | Symbols: | MATE efflux family protein | chr3:9761927-9765259 REVERSEhighly similar to ( 776) loc\_os03g42830 12003.m09334 protein transparent testa 12 protein, putative, expressed seq=cds; coord=1:253715474..253720824:1; parent\_gene=GRMZM2G021055'

'moderately similar to ( 341) AT4G34380 | Symbols: | transducin family protein / WD-40 repeat family protein | chr4:16438835-16440322 FORWARDmoderately similar to ( 479) loc\_os03g42710 12003.m09323 protein nucleotide binding protein, putative seq=cds; coord=1:253911424..253913528:-1; parent\_gene=GRMZM2G099023'

'highly similar to ( 673) AT4G15900 | Symbols: PRL1 | PRL1 (PLEIOTROPIC REGULATORY LOCUS 1); basal transcription repressor/ nucleotide binding / protein binding | chr4:9023775-9027443 FORWARDweakly similar to ( 120) PF20\_CHLRE Flagellar WD repeat protein PF20 - Chlamydomonas reinhardtiihighly similar to ( 847) loc\_os03g21990 12003.m07603 protein PP1/PP2A phosphatases pleiotropic regulator PRL1, putative, expressed seq=cds; coord=1:254094619..254104550:-1; parent\_gene=GRMZM2G017089'

'moderately similar to ( 285) AT1G18190 | Symbols: GC2 | GC2 (golgin candidate 2) | chr1:6257963-6261325 REVERSEvery weakly similar to (86.3) GOGA5\_ORYSA Golgin-84 - Oryza sativa (Rice)moderately similar to ( 458) loc\_os04g55810 12004.m10472 protein expressed protein seq=cds; coord=2:4876176..4880569:1; parent\_gene=GRMZM2G095308'

'moderately similar to ( 268) AT4G36920 | Symbols: AP2, FLO2, FL1 | AP2 (APETALA 2); transcription factor | chr4:17400998-17403140 FORWARDweakly similar to ( 130) BBM2\_BRANA Protein BABY BOOM 2 (BnBBM2) - Brassica napus (Rape)moderately similar to ( 382) loc\_os04g55560 12004.m35488 protein AP2 domain containing protein, expressed seq=cds; coord=2:5514479..5518846:-1; parent\_gene=GRMZM2G174784'

'moderately similar to ( 244) AT4G34040 | Symbols: | zinc finger (C3HC4-type RING finger) family protein | chr4:16304638-16307503 REVERSEhighly similar to ( 936) loc\_os04g55510 12004.m10442 protein zinc finger, C3HC4 type family protein, expressed seq=cds; coord=2:5566610..5573059:-1; parent\_gene=GRMZM2G174926'

'very weakly similar to (84.0) AT4G15010 | Symbols: | mitochondrial substrate carrier family protein | chr4:8573125-8574864 REVERSEweakly similar to ( 160) loc\_os04g44540 12004.m35174 protein mitochondrial carrier protein, expressed seq=cds; coord=2:26713018..26714723:1; parent\_gene=GRMZM2G114149'

'weakly similar to ( 189) AT2G28350 | Symbols: ARF10 | ARF10 (AUXIN RESPONSE FACTOR 10); miRNA binding / transcription factor | chr2:12114331-12116665 FORWARDmoderately similar to ( 234) loc\_os04g43910 12004.m09350 protein auxin response factor 16, putative, expressed seq=cds; coord=2:27979219..27980618:-1; parent\_gene=GRMZM2G122614'

'highly similar to ( 593) AT4G14340 | Symbols: CKI1, CKL11 | CKI1 (CASEIN KINASE I); kinase/ protein serine/threonine kinase | chr4:8248532-8251668 REVERSEhighly similar to ( 702) loc\_os04g43490 12004.m101584 protein casein kinase I isoform delta-like, putative, expressed seq=cds; coord=2:28936197..28940916:-1; parent\_gene=GRMZM2G032694'

'moderately similar to ( 300) AT3G54420 | Symbols: ATEP3, ATCHITIV, CHIV | ATEP3; chitinase | chr3:20145935-20147034 FORWARDmoderately similar to ( 370) CHIA\_MAIZE Endochitinase A precursor (EC 3.2.1.14) (Seed chitinase A) - Zea mays (Maize)moderately similar to ( 343) loc\_os04g41680 12004.m09144 protein endochitinase A precursor, putative, expressed seq=cds; coord=2:33507060..33508210:1; parent\_gene=GRMZM2G051921'

'moderately similar to ( 332) AT1G69850 | Symbols: ATNRT1:2, NTL1 | ATNRT1:2 (ARABIDOPSIS THALIANA NITRATE TRANSPORTER 1:2); calcium ion binding / transporter | chr1:26296945-26300407 REVERSEhighly similar to ( 771) loc\_os04g41450 12004.m09123 protein TGF-beta receptor, type I/II extracellular region, putative, expressed seq=cds; coord=2:34431765..34434969:1; parent\_gene=GRMZM2G138731'

'moderately similar to ( 218) AT2G43080 | Symbols: AT-P4H-1 | AT-P4H-1 (A. THALIANA P4H ISOFORM 1); oxidoreductase, acting on paired donors, with incorporation or reduction of molecular oxygen, 2-oxoglutarate as one donor, and incorporation of one atom each of oxygen into both donors / procollagen-proline 4-dioxygen | chr2:17915755-17918599 FORWARDmoderately similar to ( 256) loc\_os04g27850 12004.m07907 protein prolyl 4-hydroxylase alpha-1 subunit, putative, expressed seq=cds; coord=2:81940047..81979763:-1; parent\_gene=GRMZM2G028004'

'highly similar to ( 672) AT5G42240 | Symbols: scpl42 | scpl42 (serine carboxypeptidase-like 42); serine-type carboxypeptidase | chr5:16888717-16890931 FORWARDmoderately similar to ( 311) CBP23\_HORVU Serine carboxypeptidase II-3 precursor (EC 3.4.16.6) (CP-MIL3) [Contains: Serine carboxypeptidase II-3 chain A; Serine carboxypeptidase II-3 chain B] - Hordeum vulgare (Barley)highly similar to ( 805) loc\_os11g10750 12011.m05268 protein serine carboxypeptidase F13S12.6 precursor, putative, expressed seq=cds; coord=2:127442670..127445933:-1; parent\_gene=GRMZM2G132154'

'highly similar to ( 672) AT5G42240 | Symbols: scpl42 | scpl42 (serine carboxypeptidase-like 42); serine-type carboxypeptidase | chr5:16888717-16890931 FORWARDmoderately similar to ( 311) CBP23\_HORVU Serine carboxypeptidase II-3 precursor (EC 3.4.16.6) (CP-MIL3) [Contains: Serine carboxypeptidase II-3 chain A; Serine carboxypeptidase II-3 chain B] - Hordeum vulgare (Barley)highly similar to ( 805) loc\_os11g10750 12011.m05268 protein serine carboxypeptidase F13S12.6 precursor, putative, expressed seq=cds; coord=2:127442670..127445933:-1; parent\_gene=GRMZM2G132154'

'highly similar to ( 635) AT2G46370 | Symbols: JAR1, FIN219 | JAR1 (JASMONATE RESISTANT 1); ATP binding / adenylyltransferase/ catalytic/ jasmonate-amino synthetase | chr2:19034579-19036369 FORWARDhighly similar to ( 738) GH312\_ORYSA Probable indole-3-acetic acid-amido synthetase GH3.12 (EC 6.3.2.-) (Auxin-responsive GH3-like protein 12) (OsGH3-12) - Oryza sativa (Rice)highly similar to ( 801) loc\_os01g12160 12001.m07831 protein indole-3-acetic acid-amido synthetase GH3.3, putative, expressed seq=cds; coord=3:2946152..2948661:-1; parent\_gene=GRMZM2G061005'

'highly similar to ( 903) AT4G27910 | Symbols: ATX4, SDG16 | SDG16 (SET DOMAIN PROTEIN 16); protein binding / zinc ion binding | chr4:13894694-13900256 FORWARDvery weakly similar to (92.4) EZ1\_MAIZE Polycomb protein EZ1 (Enhancer of zeste protein 1) - Zea mays (Maize)nearly identical (1491) loc\_os01g11952 12001.m07811 protein histone-lysine N-methyltransferase ATX5, putative, expressed seq=cds; coord=3:3200782..3209083:1; parent\_gene=GRMZM2G085266'

'highly similar to ( 515) AT2G30050 | Symbols: | transducin family protein / WD-40 repeat family protein | chr2:12825540-12826448 FORWARDhighly similar to ( 616) loc\_os02g04320 12002.m33334 protein SEC13-related protein, putative, expressed seq=cds; coord=3:3399286..3402872:-1; parent\_gene=GRMZM2G102795'

'moderately similar to ( 385) AT2G36800 | Symbols: DOGT1, UGT73C5 | DOGT1 (DON-GLUCOSYLTRANSFERASE 1); UDP-glycosyltransferase/ cis-zeatin O-beta-D-glucosyltransferase/ glucosyltransferase/ quercetin 4'-O-glucosyltransferase/ quercetin 7-O-glucosyltransferase/ trans-zeatin O-beta-D-glucosyltransferase/ transferase, transf | chr2:15423493-15424980 REVERSEweakly similar to ( 190) CZOG\_SORBI Putative cis-zeatin O-glucosyltransferase (EC 2.4.1.215) - Sorghum bicolor (Sorghum) (Sorghum vulgare)highly similar to ( 681) loc\_os10g09990 12010.m04338 protein cytokinin-O-glucosyltransferase 3, putative, expressed seq=cds; coord=3:10843334..10845067:1; parent\_gene=GRMZM2G338465'

'highly similar to ( 822) AT1G15460 | Symbols: ATBOR4, BOR4 | BOR4 (REQUIRES HIGH BORON 4); anion exchanger | chr1:5310196-5313376 REVERSEnearly identical (1013) loc\_os01g08020 12001.m07427 protein boron transporter-like protein 2, putative, expressed seq=cds; coord=3:10934126..10940345:-1; parent\_gene=GRMZM2G051753'

'weakly similar to ( 177) AT3G08710 | Symbols: ATH9 | ATH9 (thioredoxin H-type 9) | chr3:2645590-2646304 FORWARDweakly similar to ( 105) TRXH\_WHEAT Thioredoxin H-type (TRX-H) (TrxTa) - Triticum aestivum (Wheat)moderately similar to ( 221) loc\_os05g07690 12005.m27714 protein thioredoxin H-type, putative, expressed seq=cds; coord=3:13465241..13467448:1; parent\_gene=GRMZM2G159145'

'moderately similar to ( 410) loc\_os02g43750 12002.m09409 protein transcription initiation factor, putative, expressed seq=cds; coord=3:13846717..13865900:-1; parent\_gene=GRMZM2G102664'

'moderately similar to ( 410) loc\_os02g43750 12002.m09409 protein transcription initiation factor, putative, expressed seq=cds; coord=3:13846717..13865900:-1; parent\_gene=GRMZM2G102664'

'very weakly similar to ( 100) AT1G49950 | Symbols: TRB1, ATTRB1 | DNA-binding protein, putative | chr1:18494439-18496713 REVERSEweakly similar to ( 164) loc\_os12g41920 12012.m26974 protein single myb histone 6, putative, expressed seq=cds; coord=3:14469142..14473799:-1; parent\_gene=GRMZM2G163291'

'moderately similar to ( 280) AT5G02310 | Symbols: PRT6 | PRT6 (PROTEOLYSIS 6); ubiquitin-protein ligase | chr5:474279-482552 FORWARDhighly similar to ( 504) loc\_os01g05500 12001.m42863 protein zinc finger in N-recogin family protein, putative, expressed seq=cds; coord=3:17607856..17610988:-1; parent\_gene=GRMZM2G541193'

'moderately similar to ( 456) AT3G18270 | Symbols: CYP77A5P | CYP77A5P; catalytic | chr3:6262010-6264025 FORWARDhighly similar to ( 625) loc\_os01g04630 12001.m07098 protein muconate cycloisomerase-like protein, putative, expressed seq=cds; coord=3:19939526..19944315:1; parent\_gene=GRMZM2G169152'

'moderately similar to ( 358) AT5G38260 | Symbols: | serine/threonine protein kinase, putative | chr5:15283692-15285837 REVERSEweakly similar to ( 191) KPRO\_MAIZE Putative receptor protein kinase ZmPK1 precursor (EC 2.7.11.1) - Zea mays (Maize)highly similar to ( 583) loc\_os01g04490 12001.m07084 protein Ser/Thr protein kinase, putative, expressed seq=cds; coord=3:20059223..20068196:-1; parent\_gene=GRMZM2G094028'

'moderately similar to ( 225) AT1G48000 | Symbols: MYB112, AtMYB112 | MYB112 (myb domain protein 112); DNA binding / transcription factor | chr1:17704269-17706377 REVERSEweakly similar to ( 154) MYBA2\_ORYSA Myb-related protein MYBAS2 - Oryza sativa (Rice)moderately similar to ( 297) loc\_os01g19330 12001.m08470 protein cpm7, putative, expressed seq=cds; coord=3:52308738..52309963:1; parent\_gene=GRMZM2G158700'

'moderately similar to ( 293) AT2G03200 | Symbols: | aspartyl protease family protein | chr2:966506-967891 REVERSEmoderately similar to ( 321) loc\_os04g37550 12004.m08744 protein aspartic proteinase nepenthesin-2 precursor, putative, expressed seq=cds; coord=3:54325528..54326895:-1; parent\_gene=GRMZM2G102014'

'very weakly similar to (94.7) AT1G52950 | Symbols: | replication protein-related | chr1:19725483-19728007 FORWARDmoderately similar to ( 207) loc\_os07g02230 12007.m04695 protein retrotransposon protein, putative, unclassified, expressed seq=cds; coord=3:88916116..88921100:1; parent\_gene=GRMZM2G351307'

'moderately similar to ( 258) AT4G38620 | Symbols: ATMYB4, MYB4 | MYB4; DNA binding / transcription factor | chr4:18053866-18054876 FORWARDmoderately similar to ( 256) MYB38\_MAIZE Myb-related protein Zm38 - Zea mays (Maize)moderately similar to ( 260) loc\_os11g07890 12011.m04985 protein transposon protein, putative, CACTA, En/Spm sub-class seq=cds; coord=3:140124295..140125490:1; parent\_gene=GRMZM2G041415'

'moderately similar to ( 402) AT4G09160 | Symbols: | SEC14 cytosolic factor family protein / phosphoglyceride transfer family protein | chr4:5839761-5842158 FORWARDhighly similar to ( 650) loc\_os01g65380 12001.m12651 protein patellin-5, putative, expressed seq=cds; coord=3:173472565..173475730:-1; parent\_gene=GRMZM2G081652'

'moderately similar to ( 209) AT4G38730 | Symbols: | unknown protein | chr4:18080484-18082305 REVERSEmoderately similar to ( 247) loc\_os01g65310 12001.m12644 protein non-imprinted in Prader-Willi/Angelman syndrome region protein I homolog, putative, expressed seq=cds; coord=3:173795427..173798467:1; parent\_gene=GRMZM2G037229'



'moderately similar to ( 273) AT1G44575 | Symbols: NPQ4, PSBS | NPQ4 (NONPHOTOCHEMICAL QUENCHING); chlorophyll binding / xanthophyll binding | chr1:16871768-16872548 FORWARDmoderately similar to ( 286) PSBS\_SPIOL Photosystem II 22 kDa protein, chloroplast precursor (CP22) - Spinacia oleracea (Spinach)moderately similar to ( 305) loc\_os01g64960 12001.m150788 protein photosystem II 22 kDa protein, chloroplast precursor, putative, expressed seq=cds; coord=3:174825201..174827787:-1; parent\_gene=GRMZM2G077333'

'very weakly similar to (85.1) AT1G23465 | Symbols: | signal peptidase-related | chr1:8330055-8330938 FORWARDweakly similar to ( 146) loc\_os11g40500 12011.m080046 protein mitochondrial inner membrane protease subunit 1, putative, expressed seq=cds; coord=3:195670548..195673406:-1; parent\_gene=GRMZM2G162274'

'weakly similar to ( 146) loc\_os03g08400 12003.m06348 protein retrotransposon protein, putative, unclassified seq=cds; coord=3:200406586..200410117:-1; parent\_gene=GRMZM2G330229'

'moderately similar to ( 340) AT2G37650 | Symbols: | scarecrow-like transcription factor 9 (SCL9) | chr2:15792623-15794779 FORWARDweakly similar to ( 144) CIGR2\_ORYSA Chitin-inducible gibberellin-responsive protein 2 - Oryza sativa (Rice)moderately similar to ( 464) loc\_os11g47870 12011.m08584 protein chitin-inducible gibberellin-responsive protein 2, putative, expressed seq=cds; coord=4:832522..834779:-1; parent\_gene=GRMZM2G073805'

'highly similar to ( 675) AT1G11870 | Symbols: ATSR5, OVA7, SRS | SRS (SERYL-TRNA SYNTHETASE); serine-tRNA ligase | chr1:4003895-4006556 FORWARDmoderately similar to ( 237) SYS\_HELAN Seryl-tRNA synthetase (EC 6.1.1.11) (Serine--tRNA ligase) (SerRS) - Helianthus annuus (Common sunflower)highly similar to ( 810) loc\_os11g39670 12011.m28846 protein seryl-tRNA synthetase, putative, expressed seq=cds; coord=4:5666220..5677820:-1; parent\_gene=GRMZM2G169160'

'highly similar to ( 570) AT2G27100 | Symbols: SE | SE (SERRATE); DNA binding / transcription factor | chr2:11572587-11576357 FORWARDhighly similar to ( 787) loc\_os08g40560 12008.m26744 protein expressed protein seq=cds; coord=4:42144894..42148125:1; parent\_gene=GRMZM2G377165'

'highly similar to ( 647) AT1G76270 | Symbols: | unknown protein | chr1:28613554-28616537 REVERSEhighly similar to ( 701) loc\_os09g37590 12009.m06706 protein expressed protein seq=cds; coord=4:88514893..88534830:-1; parent\_gene=GRMZM2G131699'

'very weakly similar to (82.8) AT4G24210 | Symbols: SLY1 | SLY1 (SLEEPY1) | chr4:12563658-12564113 FORWARDweakly similar to ( 148) GID2\_ORYSA F-box protein GID2 (Gibberellin-insensitive dwarf protein 2) (Protein GIBBERELLIN INSENSITIVE DWARF2) - Oryza sativa (Rice)very weakly similar to (87.4) loc\_os04g38870 12004.m35150 protein 14-3-3-like protein GF14-6, putative, expressed seq=cds; coord=4:126342399..126344503:1; parent\_gene=GRMZM2G095397'

'moderately similar to ( 213) AT1G45230 | Symbols: | defective chloroplasts and leaves protein-related / DCL protein-related | chr1:17169874-17171381 REVERSEmoderately similar to ( 284) loc\_os02g52744 12002.m10304 protein DCL protein, chloroplast precursor, putative, expressed seq=cds; coord=4:178575924..178580683:1; parent\_gene=GRMZM2G079353'

'highly similar to ( 687) AT1G65430 | Symbols: | zinc finger protein-related | chr1:24301165-24306159  
REVERSEhighly similar to ( 953) loc\_os08g42740 12008.m26855 protein protein ariadne-1, putative, expressed  
seq=cds; coord=4:193995236..194011403:1; parent\_gene=GRMZM2G100913'

'very weakly similar to (82.8) AT1G74320 | Symbols: | choline kinase, putative | chr1:27941192-27942903  
FORWARDweakly similar to ( 154) loc\_os01g08760 12001.m07501 protein choline/ethanolamine kinase, putative,  
expressed seq=cds; coord=4:236958349..236961455:1; parent\_gene=GRMZM2G111319'

'moderately similar to ( 385) AT4G04860 | Symbols: DER2.2 | DER2.2 (DERLIN-2.2) | chr4:2460135-2461378  
FORWARDmoderately similar to ( 478) DER21\_MAIZE Derlin-2.1 (ZmDerlin2-1) - Zea mays (Maize)moderately  
similar to ( 473) loc\_os03g63520 12003.m11220 protein derlin-2, putative, expressed seq=cds;  
coord=5:923899..928546:1; parent\_gene=GRMZM2G082976'

'weakly similar to ( 144) AT5G27700 | Symbols: | structural constituent of ribosome | chr5:9807541-9808048  
REVERSEweakly similar to ( 164) RS21\_MAIZE 40S ribosomal protein S21 - Zea mays (Maize)weakly similar to ( 145)  
loc\_os03g46490 12003.m09669 protein 40S ribosomal protein S21, putative seq=cds;  
coord=5:1565845..1568408:-1; parent\_gene=GRMZM2G125300'

'weakly similar to ( 164) AT3G02875 | Symbols: ILR1 | ILR1 (IAA-LEUCINE RESISTANT 1); IAA-Leu conjugate  
hydrolase/ IAA-Phe conjugate hydrolase/ metallopeptidase | chr3:631993-633859 FORWARDmoderately similar to ( 204)  
loc\_os03g62060 12003.m11084 protein IAA-amino acid hydrolase ILR1 precursor, putative, expressed seq=cds;  
coord=5:1571090..1572477:-1; parent\_gene=GRMZM2G125552'

'moderately similar to ( 309) AT2G26740 | Symbols: ATSEH | ATSEH (Arabidopsis thaliana soluble epoxide  
hydrolase); epoxide hydrolase | chr2:11393148-11394257 REVERSEmoderately similar to ( 469) loc\_os03g61360  
12003.m11018 protein epoxide hydrolase 2, putative, expressed seq=cds; coord=5:1817218..1820652:-1;  
parent\_gene=GRMZM2G133407'

'weakly similar to ( 160) AT5G02460 | Symbols: | Dof-type zinc finger domain-containing protein | chr5:539549-  
541058 REVERSEweakly similar to ( 115) PBF\_MAIZE Dof zinc finger protein PBF (Prolamin box-binding factor) -  
Zea mays (Maize)moderately similar to ( 330) loc\_os03g60630 12003.m10953 protein expressed protein seq=cds;  
coord=5:2336204..2338578:-1; parent\_gene=GRMZM2G144172'

'nearly identical (1279) AT5G35840 | Symbols: PHYC | PHYC (phytochrome defective c); protein histidine kinase |  
chr5:14008049-14011619 FORWARDnearly identical (2006) PHYC\_SORBI Phytochrome C - Sorghum bicolor  
(Sorghum) (Sorghum vulgare)nearly identical (1899) loc\_os03g54084 12003.m101724 protein phytochrome C,  
putative, expressed seq=cds; coord=5:7121947..7126963:-1; parent\_gene=GRMZM2G129889'

'highly similar to ( 747) AT3G12110 | Symbols: ACT11 | ACT11 (actin-11); structural constituent of cytoskeleton |  
chr3:3858116-3859609 FORWARDhighly similar to ( 758) ACT1\_ORYSA Actin-1 - Oryza sativa (Rice)highly  
similar to ( 758) loc\_os03g50890 12003.m10074 protein actin-1, putative, expressed seq=cds;  
coord=5:10223674..10226373:-1; parent\_gene=GRMZM2G152328'

'highly similar to ( 670) AT5G23190 | Symbols: CYP86B1 | CYP86B1; electron carrier/ heme binding / iron ion binding / monooxygenase/ oxygen binding | chr5:7803478-7805659 REVERSEweakly similar to ( 114) C97B2\_SOYBN Cytochrome P450 97B2 (EC 1.14.-.-) - Glycine max (Soybean)highly similar to ( 830) loc\_os10g34480 12010.m06272 protein cytochrome P450 86A2, putative, expressed seq=cds; coord=5:26443691..26446113:1; parent\_gene=GRMZM2G013082'

'very weakly similar to (95.1) AT3G03590 | Symbols: | SWIB complex BAF60b domain-containing protein | chr3:865341-866669 REVERSEweakly similar to ( 125) loc\_os02g03730 12002.m05722 protein SWIB domain-containing protein, putative, expressed seq=cds; coord=5:74408556..74411160:-1; parent\_gene=GRMZM2G524937'

'moderately similar to ( 237) AT3G59310 | Symbols: | unknown protein | chr3:21922316-21924313 REVERSEmoderately similar to ( 298) loc\_os08g42720 12008.m26773 protein solute carrier family 35, member F1, putative, expressed seq=cds; coord=5:108648845..108650638:-1; parent\_gene=GRMZM2G072407'

'very weakly similar to (89.0) loc\_os02g14980 12002.m06741 protein sodium/calcium exchanger protein, expressed seq=cds; coord=5:143957640..143958195:-1; parent\_gene=GRMZM2G030945'

'moderately similar to ( 413) AT3G02040 | Symbols: SRG3 | SRG3 (senescence-related gene 3); glycerophosphodiester phosphodiesterase/ phosphoric diester hydrolase | chr3:348505-349909 REVERSEhighly similar to ( 585) loc\_os02g31030 12002.m08246 protein glycerophosphodiester phosphodiesterase, putative, expressed seq=cds; coord=5:164727076..164730451:-1; parent\_gene=GRMZM2G018820'

'weakly similar to ( 102) AT5G13910 | Symbols: LEP | LEP (LEAFY PETIOLE); DNA binding / transcription factor | chr5:4482450-4483085 REVERSEweakly similar to ( 195) loc\_os02g32040 12002.m08297 protein AP2 domain containing protein seq=cds; coord=5:166514893..166515834:1; parent\_gene=GRMZM2G047999'

'highly similar to ( 887) AT3G11670 | Symbols: DGD1 | DGD1 (DIGALACTOSYL DIACYLGLYCEROL DEFICIENT 1); UDP-galactosyltransferase/ galactolipid galactosyltransferase/ transferase, transferring glycosyl groups | chr3:3681679-3684495 REVERSEhighly similar to ( 901) DGDG1\_SOYBN Digalactosyldiacylglycerol synthase 1, chloroplast precursor (EC 2.4.1.241) - Glycine max (Soybean)highly similar to ( 996) loc\_os02g33580 12002.m33714 protein digalactosyldiacylglycerol synthase 1, putative, expressed seq=cds; coord=5:170070982..170073578:1; parent\_gene=GRMZM2G092588'

'moderately similar to ( 322) AT1G12260 | Symbols: VND4, EMB2749, ANAC007 | ANAC007 (ARABIDOPSIS NAC 007); transcription factor | chr1:4163058-4164486 REVERSEmoderately similar to ( 229) NAC76\_ORYSA NAC domain-containing protein 76 (ONAC076) - Oryza sativa (Rice)moderately similar to ( 478) loc\_os02g42970 12002.m09332 protein NAC domain-containing protein 76, putative seq=cds; coord=5:189401545..189405925:-1; parent\_gene=GRMZM2G315140'

'weakly similar to ( 105) loc\_os04g47890 12004.m09729 protein myb-like DNA-binding domain, SHAQKYF class family protein, expressed seq=cds; coord=5:194250832..194253964:1; parent\_gene=GRMZM2G106185'

'very weakly similar to (85.5) AT3G30390 | Symbols: | amino acid transporter family protein | chr3:11977112-11978827 REVERSEvery weakly similar to (95.5) loc\_os02g49510 12002.m09985 protein amino acid transporter-like protein, putative, expressed seq=cds; coord=5:204528827..204529273:-1; parent\_gene=GRMZM2G020738'

'nearly identical (1048) AT5G60930 | Symbols: | chromosome-associated kinesin, putative | chr5:24515398-24522511 REVERSEmoderately similar to ( 259) FLA10\_CHLRE Kinesin-like protein FLA10 (Protein KHP1) - Chlamydomonas reinhardtii  
moderately similar to ( 498) loc\_os02g50910 12002.m10125 protein ATP binding protein, putative, expressed seq=cds; coord=5:206459893..206468689:-1; parent\_gene=GRMZM2G026560'

'weakly similar to ( 147) AT5G65220 | Symbols: | ribosomal protein L29 family protein | chr5:26061301-26062506 FORWARDmoderately similar to ( 228) RK29\_MAIZE 50S ribosomal protein L29, chloroplast precursor (CL29) - Zea mays (Maize)  
weakly similar to ( 199) loc\_os02g51790 12002.m10210 protein 50S ribosomal protein L29, chloroplast precursor, putative, expressed seq=cds; coord=5:208341565..208343539:1; parent\_gene=GRMZM2G159554'

'moderately similar to ( 299) ATCG00170 | Symbols: RPOC2 | RNA polymerase beta' subunit-2 | chrC:15938-20068 REVERSEnearly identical (1103) RPOC2\_MAIZE DNA-directed RNA polymerase beta" chain (EC 2.7.7.6) (PEP) (Plastid-encoded RNA polymerase beta" subunit) (RNA polymerase beta" subunit) - Zea mays (Maize)  
highly similar to ( 578) loc\_osp1g00260 11562.m00015 protein RNA polymerase beta" chain seq=cds; coord=5:210010750..210014897:1; parent\_gene=GRMZM2G055859'

'weakly similar to ( 157) AT2G46620 | Symbols: | AAA-type ATPase family protein | chr2:19139071-19140546 REVERSEmoderately similar to ( 280) loc\_os03g02330 12003.m05775 protein ATP binding protein, putative, expressed seq=cds; coord=5:210728409..210730929:-1; parent\_gene=GRMZM2G403454'

'moderately similar to ( 285) AT1G13080 | Symbols: CYP71B2 | CYP71B2 (CYTOCHROME P450 71B2); electron carrier/ heme binding / iron ion binding / monooxygenase/ oxygen binding | chr1:4459493-4460807 FORWARDmoderately similar to ( 464) C71C4\_MAIZE Cytochrome P450 71C4 (EC 1.14.-.-) (Benzoxazineless 2) - Zea mays (Maize)  
moderately similar to ( 499) loc\_os08g01510 12008.m04299 protein cytochrome P450 71C4, putative, expressed seq=cds; coord=6:792072..794081:1; parent\_gene=GRMZM2G052825'

'moderately similar to ( 316) AT2G41900 | Symbols: | zinc finger (CCCH-type) family protein | chr2:17491352-17493502 FORWARDhighly similar to ( 654) loc\_os07g38090 12007.m28994 protein nucleic acid binding protein, putative, expressed seq=cds; coord=6:1823029..1825102:-1; parent\_gene=AC233871.1\_FG008'

'weakly similar to ( 145) AT3G49050 | Symbols: | lipase class 3 family protein / calmodulin-binding heat-shock protein, putative | chr3:18181498-18183613 FORWARDmoderately similar to ( 257) loc\_os06g14490 12006.m32040 protein calmodulin-binding heat-shock protein, putative, expressed seq=cds; coord=6:118603733..118605257:1; parent\_gene=GRMZM2G174315'

'weakly similar to ( 104) AT4G30590 | Symbols: | plastocyanin-like domain-containing protein | chr4:14935760-14936469 REVERSEweakly similar to ( 180) loc\_os06g17730 12006.m06485 protein blue copper protein precursor, putative, expressed seq=cds; coord=6:119641904..119642938:1; parent\_gene=GRMZM2G148624'

'moderately similar to ( 326) AT3G21770 | Symbols: | peroxidase 30 (PER30) (P30) (PRXR9) | chr3:7673345-7674661 FORWARDmoderately similar to ( 372) PER1\_ORYSA Peroxidase 1 precursor (EC 1.11.1.7) - Oryza sativa (Rice)moderately similar to ( 484) loc\_os06g29470 12006.m07491 protein peroxidase 1 precursor, putative, expressed seq=cds; coord=6:120912973..120914397:1; parent\_gene=GRMZM2G104109'

'highly similar to ( 733) AT4G11110 | Symbols: SPA2 | SPA2 (SPA1-RELATED 2); protein binding / signal transducer | chr4:6772163-6776675 FORWARDmoderately similar to ( 329) COP1\_PEA E3 ubiquitin ligase protein COP1 (EC 6.3.2.-) (Constitutive photomorphogenesis protein 1) - Pisum sativum (Garden pea)nearly identical (1523) loc\_os05g49590 12005.m083816 protein SPA1, putative, expressed seq=cds; coord=6:165393177..165402270:-1; parent\_gene=GRMZM2G145556'

'highly similar to ( 733) AT4G11110 | Symbols: SPA2 | SPA2 (SPA1-RELATED 2); protein binding / signal transducer | chr4:6772163-6776675 FORWARDmoderately similar to ( 329) COP1\_PEA E3 ubiquitin ligase protein COP1 (EC 6.3.2.-) (Constitutive photomorphogenesis protein 1) - Pisum sativum (Garden pea)nearly identical (1523) loc\_os05g49590 12005.m083816 protein SPA1, putative, expressed seq=cds; coord=6:165393177..165402270:-1; parent\_gene=GRMZM2G145556'

'highly similar to ( 733) AT4G11110 | Symbols: SPA2 | SPA2 (SPA1-RELATED 2); protein binding / signal transducer | chr4:6772163-6776675 FORWARDmoderately similar to ( 329) COP1\_PEA E3 ubiquitin ligase protein COP1 (EC 6.3.2.-) (Constitutive photomorphogenesis protein 1) - Pisum sativum (Garden pea)nearly identical (1523) loc\_os05g49590 12005.m083816 protein SPA1, putative, expressed seq=cds; coord=6:165393177..165402270:-1; parent\_gene=GRMZM2G145556'

'highly similar to ( 733) AT4G11110 | Symbols: SPA2 | SPA2 (SPA1-RELATED 2); protein binding / signal transducer | chr4:6772163-6776675 FORWARDmoderately similar to ( 329) COP1\_PEA E3 ubiquitin ligase protein COP1 (EC 6.3.2.-) (Constitutive photomorphogenesis protein 1) - Pisum sativum (Garden pea)nearly identical (1523) loc\_os05g49590 12005.m083816 protein SPA1, putative, expressed seq=cds; coord=6:165393177..165402270:-1; parent\_gene=GRMZM2G145556'

'weakly similar to ( 145) AT2G32060 | Symbols: | 40S ribosomal protein S12 (RPS12C) | chr2:13639228-13640104 REVERSEmoderately similar to ( 203) RS12\_HORVU 40S ribosomal protein S12 - Hordeum vulgare (Barley)weakly similar to ( 197) loc\_os07g12650 12007.m079809 protein 40S ribosomal protein S12, putative, expressed seq=cds; coord=6:165961344..165962988:-1; parent\_gene=GRMZM2G132929'

'highly similar to ( 695) AT1G30220 | Symbols: ATINT2, INT2 | INT2 (INOSITOL TRANSPORTER 2); carbohydrate transmembrane transporter/ sugar:hydrogen symporter | chr1:10632957-10635439 REVERSEweakly similar to ( 124) STC\_RICCO Sugar carrier protein C - Ricinus communis (Castor bean)highly similar to ( 787) loc\_os07g05640 12007.m05028 protein proton myo-inositol cotransporter, putative, expressed seq=cds; coord=7:5335384..5337829:1; parent\_gene=GRMZM2G142063'

'moderately similar to ( 260) AT4G36920 | Symbols: AP2, FLO2, FL1 | AP2 (APETALA 2); transcription factor | chr4:17400998-17403140 FORWARDweakly similar to ( 147) BBM2\_BRANA Protein BABY BOOM 2 (BnBBM2) - Brassica napus (Rape)moderately similar to ( 496) loc\_os07g13170 12007.m29109 protein floral homeotic protein, putative, expressed seq=cds; coord=7:22004372..22015553:1; parent\_gene=GRMZM2G176175'

'weakly similar to ( 150) AT5G28050 | Symbols: | cytidine/deoxycytidylate deaminase family protein | chr5:10044209-10045484 REVERSEweakly similar to ( 161) loc\_os07g14150 12007.m079579 protein cytidine/deoxycytidylate deaminase family protein, putative, expressed seq=cds; coord=7:24368445..24370041:1; parent\_gene=GRMZM2G173063'

'weakly similar to ( 150) AT5G28050 | Symbols: | cytidine/deoxycytidylate deaminase family protein | chr5:10044209-10045484 REVERSEweakly similar to ( 161) loc\_os07g14150 12007.m079579 protein cytidine/deoxycytidylate deaminase family protein, putative, expressed seq=cds; coord=7:24368445..24370041:1; parent\_gene=GRMZM2G173063'

'nearly identical (1554) AT4G39350 | Symbols: CESA2, ATH-A, ATCESA2 | CESA2 (CELLULOSE SYNTHASE A2); cellulose synthase/ transferase, transferring glycosyl groups | chr4:18297078-18301890 FORWARDnearly identical (1955) loc\_os07g14850 12007.m05929 protein CESA6 - cellulose synthase, expressed seq=cds; coord=7:26487882..26493965:1; parent\_gene=GRMZM2G177631'

'very weakly similar to ( 100) loc\_os09g29820 12009.m06133 protein BZIP family transcription factor, putative, expressed seq=cds; coord=7:129898415..129899290:-1; parent\_gene=GRMZM2G358796'

'weakly similar to ( 149) AT5G50890 | Symbols: | LOCATED IN: cellular\_component unknown; EXPRESSED IN: 17 plant structures; EXPRESSED DURING: 13 growth stages; BEST Arabidopsis thaliana protein match is: lipase class 3 family protein (TAIR:AT2G05260.1); Has 115 Blast hits to 115 proteins in 7 species: Archae - 0; Bacteria - 0; Metazoa - 0; Fungi - 0; Plants - 115; Viruses - 0; Other Eukaryotes - 0 (source: NCBI BLINK). | chr5:20702684-20704235 FORWARDmoderately similar to ( 313) loc\_os07g39810 12007.m08223 protein triacylglycerol lipase, putative, expressed seq=cds; coord=7:161804206..161805610:-1; parent\_gene=GRMZM2G179777'

'very weakly similar to (95.1) AT5G04340 | Symbols: C2H2, CZF2, ZAT6 | ZAT6 (ZINC FINGER OF ARABIDOPSIS THALIANA 6); nucleic acid binding / transcription factor/ zinc ion binding | chr5:1216321-1217037 REVERSEvery weakly similar to (82.8) ZFP1\_WHEAT Zinc-finger protein 1 (WZF1) - Triticum aestivum (Wheat)weakly similar to ( 137) loc\_os07g40080 12007.m08250 protein zinc-finger protein 1, putative, expressed seq=cds; coord=7:162313242..162313838:1; parent\_gene=AC185108.3\_FG011'

'nearly identical (1023) AT3G02050 | Symbols: KUP3, ATKUP3, ATKT4 | KUP3 (K

'highly similar to ( 580) AT5G58380 | Symbols: CIPK10, PKS2, SIP1, SNRK3.8 | SIP1 (SOS3-INTERACTING PROTEIN 1); ATP binding / kinase/ protein kinase/ protein serine/threonine kinase | chr5:23597092-23598531 REVERSEmoderately similar to ( 454) CIPK1\_ORYSA CIPK-like protein 1 (EC 2.7.11.1) (OsCK1) - Oryza sativa (Rice)highly similar to ( 744) loc\_os07g48100 12007.m09025 protein CBL-interacting serine/threonine-protein kinase 15, putative, expressed seq=cds; coord=7:172925400..172928378:-1; parent\_gene=GRMZM2G166658'

'moderately similar to ( 308) AT1G55545 | Symbols: | unknown protein | chr1:20738987-20743049  
REVERSEmoderately similar to ( 387) loc\_os07g48602 12007.m66702 protein EMB1011, putative, expressed  
seq=cds; coord=7:173827304..173838463:-1; parent\_gene=AC155434.2\_FG004'

'moderately similar to ( 214) AT3G04030 | Symbols: | myb family transcription factor | chr3:1042920-1044574  
REVERSEmoderately similar to ( 284) loc\_os07g48596 12007.m09071 protein MYR1, putative, expressed seq=cds;  
coord=7:173817875..173820052:-1; parent\_gene=AC155434.2\_FG005'

'moderately similar to ( 224) AT2G01275 | Symbols: | zinc finger (C3HC4-type RING finger) family protein |  
chr2:142610-143809 REVERSEmoderately similar to ( 413) loc\_os01g03100 12001.m42845 protein protein binding  
protein, putative, expressed seq=cds; coord=8:10287956..10291623:-1; parent\_gene=GRMZM2G003930'

'moderately similar to ( 205) AT5G05140 | Symbols: | transcription elongation factor-related | chr5:1520353-1522297  
FORWARDhighly similar to ( 598) loc\_os05g34210 12005.m07652 protein expressed protein seq=cds;  
coord=8:104616112..104619975:1; parent\_gene=GRMZM2G087451'

'highly similar to ( 866) AT1G26370 | Symbols: | RNA helicase, putative | chr1:9122030-9125368 REVERSEnearly  
identical (1169) loc\_os06g09280 12006.m05647 protein ATP-dependent RNA helicase DHX8, putative, expressed  
seq=cds; coord=8:160365905..160374292:1; parent\_gene=GRMZM2G300375'

'moderately similar to ( 265) AT3G57170 | Symbols: | N-acetylglucosaminyl transferase component family protein /  
Gpi1 family protein | chr3:21159620-21162259 REVERSEweakly similar to ( 187) loc\_os05g22370 12005.m27768  
protein N-acetylglucosaminyl transferase component, putative, expressed seq=cds; coord=8:161880772..161882765:1;  
parent\_gene=GRMZM2G070898'

'moderately similar to ( 265) AT3G57170 | Symbols: | N-acetylglucosaminyl transferase component family protein /  
Gpi1 family protein | chr3:21159620-21162259 REVERSEweakly similar to ( 187) loc\_os05g22370 12005.m27768  
protein N-acetylglucosaminyl transferase component, putative, expressed seq=cds; coord=8:161880772..161882765:1;  
parent\_gene=GRMZM2G070898'

'moderately similar to ( 265) AT3G57030 | Symbols: | strictosidine synthase family protein | chr3:21101653-21103204  
REVERSEweakly similar to ( 153) STSY\_CATRO Strictosidine synthase precursor (EC 4.3.3.2) - Catharanthus roseus  
(Rosy periwinkle) (Madagascar periwinkle)moderately similar to ( 497) loc\_os08g07810 12008.m04918 protein  
strictosidine synthase 1 precursor, putative seq=cds; coord=8:165827475..165828933:-1;  
parent\_gene=GRMZM2G338431'

'moderately similar to ( 335) AT5G54500 | Symbols: FQR1 | FQR1 (FLAVODOXIN-LIKE QUINONE REDUCTASE  
1); FMN binding / oxidoreductase, acting on NADH or NADPH, quinone or similar compound as acceptor |  
chr5:22124674-22126256 FORWARDmoderately similar to ( 385) loc\_os01g57570 12001.m43222 protein minor  
allergen Alt a 7, putative, expressed seq=cds; coord=8:171852196..171855863:-1; parent\_gene=GRMZM2G159643'

'moderately similar to ( 315) AT4G28190 | Symbols: ULT1, ULT | ULT1 (ULTRAPETALA1); DNA binding |  
chr4:13985753-13987050 FORWARDmoderately similar to ( 379) loc\_os01g57240 12001.m11877 protein expressed  
protein seq=cds; coord=8:172005510..172009034:1; parent\_gene=GRMZM2G004690'

'highly similar to ( 672) AT1G63640 | Symbols: | kinesin motor protein-related | chr1:23589234-23595139 REVERSEmoderately similar to ( 223) FLA10\_CHLRE Kinesin-like protein FLA10 (Protein KHP1) - Chlamydomonas reinhardtinearly identical (1002) loc\_os01g54080 12001.m11572 protein ATP binding protein, putative, expressed seq=cds; coord=8:174956855..174961114:-1; parent\_gene=GRMZM2G124883'

'moderately similar to ( 496) AT5G19730 | Symbols: | pectinesterase family protein | chr5:6670562-6673202 FORWARDweakly similar to ( 187) PME\_PRUPE Pectinesterase PPE8B precursor (EC 3.1.1.11) (Pectin methylesterase) (PE) - Prunus persica (Peach)highly similar to ( 615) loc\_os01g53990 12001.m42718 protein pectinesterase-2 precursor, putative, expressed seq=cds; coord=8:175092256..175093999:1; parent\_gene=GRMZM2G120779'

'weakly similar to ( 191) AT1G24090 | Symbols: | RNase H domain-containing protein | chr1:8520834-8524690 FORWARDmoderately similar to ( 281) loc\_os06g13010 12006.m06017 protein nucleic acid binding protein, putative, expressed seq=cds; coord=9:2485121..2487554:-1; parent\_gene=GRMZM2G016275'

'highly similar to ( 791) AT1G73590 | Symbols: PIN1, ATPIN1 | PIN1 (PIN-FORMED 1); transporter | chr1:27659772-27662876 FORWARDhighly similar to ( 987) PIN1C\_ORYSA Probable auxin efflux carrier component 1c (OsPIN1c) Oryza sativa (Rice)highly similar to ( 987) loc\_os06g12610 12006.m05977 protein auxin efflux carrier component 1c, putative, expressed seq=cds; coord=9:3650766..3654174:1; parent\_gene=GRMZM2G098643'

'nearly identical (1504) AT5G65460 | Symbols: | kinesin motor protein-related | chr5:26161831-26169001 REVERSEweakly similar to ( 138) FLA10\_CHLRE Kinesin-like protein FLA10 (Protein KHP1) - Chlamydomonas reinhardtiihighly similar to ( 894) loc\_os06g11380 12006.m05855 protein ATP binding protein, putative, expressed seq=cds; coord=9:7186959..7210629:-1; parent\_gene=GRMZM2G017257'

'weakly similar to ( 174) AT4G27600 | Symbols: | pfkB-type carbohydrate kinase family protein | chr4:13782753-13785005 REVERSEmoderately similar to ( 224) loc\_os10g42240 12010.m21983 protein carbohydrate kinase-like protein, putative, expressed seq=cds; coord=9:112819814..112820314:1; parent\_gene=GRMZM2G144245'

'moderately similar to ( 352) loc\_os08g37270 12008.m07713 protein AHM1, putative, expressed seq=cds; coord=9:113061120..113065160:1; parent\_gene=AC225193.3\_FG004'

'very weakly similar to (94.4) AT4G16580 | Symbols: | catalytic | chr4:9341152-9342555 REVERSEweakly similar to ( 184) loc\_os02g42250 12002.m09261 protein T-cell activation protein phosphatase 2C-like protein, putative seq=cds; coord=9:122054370..122055332:1; parent\_gene=AC217887.3\_FG001'

'moderately similar to ( 379) AT3G59890 | Symbols: | dihydrodipicolinate reductase family protein | chr3:22124497-22126491 REVERSEmoderately similar to ( 488) loc\_os03g14120 12003.m34820 protein dihydrodipicolinate reductase, putative, expressed seq=cds; coord=9:142950199..142960205:-1; parent\_gene=GRMZM2G104575'

'moderately similar to ( 323) AT5G04740 | Symbols: | ACT domain-containing protein | chr5:1368713-1371391 REVERSEmoderately similar to ( 415) loc\_os12g05650 12012.m04558 protein ACT domain containing protein, expressed seq=cds; coord=10:5523751..5529199:-1; parent\_gene=GRMZM2G066496'



'moderately similar to ( 417) AT2G25100 | Symbols: | ribonuclease HII family protein | chr2:10679767-10681654  
REVERSEhighly similar to ( 537) loc\_os11g05570 12011.m04754 protein ribonuclease HI large subunit, putative,  
expressed seq=cds; coord=10:5896223..5900069:1; parent\_gene=GRMZM2G065804'

'weakly similar to ( 110) AT1G67320 | Symbols: | DNA primase, large subunit family | chr1:25205520-25208966  
REVERSEweakly similar to ( 136) loc\_os07g22400 12007.m079652 protein DNA primase large subunit, putative,  
expressed seq=cds; coord=10:6593015..6594700:1; parent\_gene=GRMZM2G044317'

'weakly similar to ( 104) AT5G66320 | Symbols: | zinc finger (GATA type) family protein | chr5:26496208-26497309  
REVERSEweakly similar to ( 122) loc\_os12g07120 12012.m04702 protein basic proline-rich protein, putative,  
expressed seq=cds; coord=10:9404998..9406937:1; parent\_gene=GRMZM2G118214'

'nearly identical (1518) AT1G02730 | Symbols: ATCSLD5, CSLD5 | ATCSLD5; 1,4-beta-D-xylan synthase/ cellulose  
synthase | chr1:594697-598473 REVERSEnearly identical (1830) loc\_os12g36890 12012.m07474 protein CSLD4 -  
cellulose synthase-like family D, expressed seq=cds; coord=10:22261833..22266237:1;  
parent\_gene=GRMZM2G015886'

'moderately similar to ( 233) AT5G57580 | Symbols: | calmodulin-binding protein | chr5:23314994-23317683  
REVERSEhighly similar to ( 692) loc\_os12g36110 12012.m07401 protein calmodulin binding protein, putative,  
expressed seq=cds; coord=10:23804445..23808523:-1; parent\_gene=GRMZM2G176472'

'nearly identical (2670) AT4G35800 | Symbols: NRPB1, RPB1, RNA\_POL\_II\_LSRNA\_POL\_II\_LS,  
RNA\_POL\_II\_LS | NRPB1 (RNA POLYMERASE II LARGE SUBUNIT); DNA binding / DNA-directed RNA  
polymerase | chr4:16961115-16967892 REVERSEweakly similar to ( 145) RPOC1\_MESVI DNA-directed RNA  
polymerase beta' chain (EC 2.7.7.6) (PEP) (Plastid-encoded RNA polymerase beta' subunit) (RNA polymerase beta'  
subunit) - Mesostigma viridenearly identical (2829) loc\_os05g05860 12005.m05113 protein DNA-directed RNA  
polymerase II largest subunit, putative, expressed seq=cds; coord=10:79744869..79753713:1;  
parent\_gene=GRMZM2G044306'

'moderately similar to ( 349) AT3G62260 | Symbols: | protein phosphatase 2C, putative / PP2C, putative |  
chr3:23038516-23040391 REVERSEhighly similar to ( 525) loc\_os05g04360 12005.m04969 protein protein  
phosphatase 2C homolog 2, putative, expressed seq=cds; coord=10:85581746..85584681:1;  
parent\_gene=GRMZM2G060798'

'moderately similar to ( 320) AT3G17510 | Symbols: CIPK1, SnRK3.16 | CIPK1 (CBL-INTERACTING PROTEIN  
KINASE 1); kinase/ protein binding | chr3:5989309-5992627 REVERSEmoderately similar to ( 277) CIPK1\_ORYSA  
CIPK-like protein 1 (EC 2.7.11.1) (OsCK1) - Oryza sativa (Rice)moderately similar to ( 377) loc\_os05g04550  
12005.m04988 protein CBL-interacting serine/threonine-protein kinase 1, putative, expressed seq=cds;  
coord=10:86697591..86707160:-1; parent\_gene=GRMZM2G099002'

'moderately similar to ( 328) AT1G47980 | Symbols: | unknown protein | chr1:17691985-17693818  
REVERSEmoderately similar to ( 481) loc\_os04g33150 12004.m08410 protein desiccation-related protein PCC13-62  
precursor, putative, expressed seq=cds; coord=10:113302165..113304045:-1; parent\_gene=GRMZM2G138937'

'weakly similar to ( 140) AT5G66320 | Symbols: | zinc finger (GATA type) family protein | chr5:26496208-26497309 REVERSEmoderately similar to ( 256) loc\_os02g43150 12002.m100295 protein GATA zinc finger family protein, expressed seq=cds; coord=10:133367444..133369576:1; parent\_gene=GRMZM2G054615'

'highly similar to ( 682) AT2G43020 | Symbols: ATPAO2 | ATPAO2 (Polyamine oxidase 2); amine oxidase/ electron carrier/ oxidoreductase | chr2:17891945-17894440 FORWARDweakly similar to ( 134) PAO\_MAIZE Polyamine oxidase precursor (EC 1.5.3.11) - Zea mays (Maize)highly similar to ( 848) loc\_os04g53190 12004.m35201 protein lysine-specific histone demethylase 1, putative, expressed seq=cds; coord=10:143058165..143063379:1; parent\_gene=GRMZM2G396856'

'highly similar to ( 682) AT2G43020 | Symbols: ATPAO2 | ATPAO2 (Polyamine oxidase 2); amine oxidase/ electron carrier/ oxidoreductase | chr2:17891945-17894440 FORWARDweakly similar to ( 134) PAO\_MAIZE Polyamine oxidase precursor (EC 1.5.3.11) - Zea mays (Maize)highly similar to ( 848) loc\_os04g53190 12004.m35201 protein lysine-specific histone demethylase 1, putative, expressed seq=cds; coord=10:143058165..143063379:1; parent\_gene=GRMZM2G396856'

'moderately similar to ( 216) AT1G62040 | Symbols: ATG8C | ATG8C (autophagy 8c); microtubule binding | chr1:22933216-22934253 FORWARDmoderately similar to ( 226) loc\_os08g09240 12008.m26825 protein autophagy-related protein 8 precursor, putative, expressed seq=cds; coord=10:142965742..142968913:1; parent\_gene=GRMZM2G419694'

'moderately similar to ( 394) AT4G23180 | Symbols: CRK10, RLK4 | CRK10 (CYSTEINE-RICH RLK10); ATP binding / kinase/ protein kinase/ protein serine/threonine kinase/ protein tyrosine kinase | chr4:12138171-12140780 FORWARDmoderately similar to ( 203) PSKR\_DAUCA Phytosulfokine receptor precursor (EC 2.7.11.1) (Phytosulfokine LRR receptor kinase) - Daucus carota (Carrot)highly similar to ( 523) loc\_os04g53994 12004.m10292 protein ATP binding protein, putative, expressed seq=cds; coord=10:144138641..144143208:-1; parent\_gene=GRMZM2G000633'

'nearly identical (1069) AT5G64570 | Symbols: XYLA, ATBXL4 | XYLA; hydrolase, hydrolyzing O-glycosyl compounds / xylan 1,4-beta-xylosidase | chr5:25810227-25813309 REVERSEmoderately similar to ( 468) XYNB\_PRUPE Putative beta-D-xylosidase (EC 3.2.1.-) (PpAz152) (Fragment) - Prunus persica (Peach)nearly identical (1342) loc\_os04g54810 12004.m10373 protein beta-D-xylosidase, putative, expressed seq=cds; coord=10:144683393..144689170:-1; parent\_gene=GRMZM2G136895'

'weakly similar to ( 125) AT3G19000 | Symbols: | oxidoreductase, 2OG-Fe(II) oxygenase family protein | chr3:6554004-6554987 REVERSEweakly similar to ( 130) GAOX2\_ORYSA Gibberellin 20 oxidase 2 (EC 1.14.11.-) (Gibberellin C-20 oxidase 2) (GA 20-oxidase 2) (Os20ox2) (Semidwarf-1 protein) - Oryza sativa (Rice)highly similar to ( 513) loc\_os04g55070 12004.m10399 protein gibberellin 20 oxidase 2, putative seq=cds; coord=10:144978459..144980157:1; parent\_gene=GRMZM2G127668'

---

---

**First Predicted Gene to Right**

---

**Description**

---

'moderately similar to ( 446) AT2G38110 | Symbols: ATGPAT6, GPAT6 | GPAT6 (GLYCEROL-3-PHOSPHATE ACYLTRANSFERASE 6); 1-acylglycerol-3-phosphate O-acyltransferase/ acyltransferase | chr2:15952816-15955364 REVERSEhighly similar to ( 649) loc\_os10g27330 12010.m05667 protein glycerol-3-phosphate acyltransferase 8, putative, expressed seq=cds; coord=1:14031387..14033776:-1; parent\_gene=GRMZM2G124042'

'highly similar to ( 556) AT1G19250 | Symbols: FMO1 | FMO1 (FLAVIN-DEPENDENT MONOOXYGENASE 1); FAD binding / NADP or NADPH binding / electron carrier/ flavin-containing monooxygenase/ monooxygenase/ oxidoreductase | chr1:6650656-6653053 REVERSEhighly similar to ( 833) loc\_os03g08410 12003.m06349 protein monooxygenase/ oxidoreductase, putative, expressed seq=cds; coord=1:17015718..17018487:1; parent\_gene=GRMZM2G000427'

'very weakly similar to (92.8) AT2G17880 | Symbols: | DNAJ heat shock protein, putative | chr2:7767176-7767658 REVERSEweakly similar to ( 110) loc\_os08g43490 12008.m08323 protein chaperone protein dnaJ 11, chloroplast precursor, putative, expressed seq=cds; coord=1:33408583..33409730:-1; parent\_gene=GRMZM2G448368'

'weakly similar to ( 195) AT3G18950 | Symbols: | transducin family protein / WD-40 repeat family protein | chr3:6536900-6538321 FORWARDmoderately similar to ( 253) loc\_os12g40260 12012.m07810 protein nucleotide binding protein, putative, expressed seq=cds; coord=1:166060337..166065479:1; parent\_gene=GRMZM2G088613'

'seq=cds; coord=1:177626745..177627125:-1; parent\_gene=GRMZM2G422419'

'weakly similar to ( 104) loc\_os08g38020 12008.m07787 protein bZIP protein, putative, expressed seq=cds; coord=1:182626670..182627576:-1; parent\_gene=AC186606.4\_FG003'

'weakly similar to ( 103) AT3G25070 | Symbols: RIN4 | RIN4 (RPM1 INTERACTING PROTEIN 4); protein binding | chr3:9132458-9133747 FORWARDmoderately similar to ( 235) loc\_os08g41470 12008.m62027 protein expressed protein seq=cds; coord=1:192932651..192935281:-1; parent\_gene=GRMZM2G703858'

'weakly similar to ( 157) AT3G11750 | Symbols: | dihydroneopterin aldolase, putative | chr3:3715071-3715904 REVERSEmoderately similar to ( 206) loc\_os09g38759 12009.m50203 protein dihydroneopterin aldolase, putative, expressed seq=cds; coord=1:206197528..206201863:1; parent\_gene=GRMZM2G095579'

'weakly similar to ( 184) AT2G17730 | Symbols: | zinc finger (C3HC4-type RING finger) family protein | chr2:7704142-7705312 FORWARDmoderately similar to ( 257) loc\_os08g43670 12008.m08341 protein RING-H2 finger protein ATL2B, putative, expressed seq=cds; coord=1:206463126..206464716:1; parent\_gene=GRMZM2G112617'

'moderately similar to ( 205) AT5G21482 | Symbols: CKX7, ATCKX5 | CKX7 (CYTOKININ OXIDASE 7); cytokinin dehydrogenase/ oxidoreductase | chr5:7226842-7230052 FORWARDweakly similar to ( 159) CKX1\_MAIZE Cytokinin dehydrogenase 1 precursor (EC 1.5.99.12) (Cytokinin oxidase 1) (CKO 1) (COX 1) (ZmCKX1) - Zea mays (Maize)moderately similar to ( 296) loc\_os08g35860 12008.m07575 protein cytokinin dehydrogenase 7, putative, expressed seq=cds; coord=1:207710634..207712091:1; parent\_gene=GRMZM2G348452'

'weakly similar to ( 101) AT5G20630 | Symbols: GLP3, GLP3A, GLP3B, ATGER3, GER3 | GER3 (GERMIN 3); oxalate oxidase | chr5:6975315-6975950 REVERSEweakly similar to ( 103) GLP1\_SINAL Germin-like protein 1 precursor - Sinapis alba (White mustard) (Brassica hirta)weakly similar to ( 114) loc\_os08g35750 12008.m07564 protein germin-like protein 1 precursor, putative, expressed seq=cds; coord=1:207865153..207865778:-1; parent\_gene=GRMZM2G363004'

'weakly similar to ( 132) AT4G35160 | Symbols: | O-methyltransferase family 2 protein | chr4:16730989-16732808 REVERSEmoderately similar to ( 293) ZRP4\_MAIZE O-methyltransferase ZRP4 (EC 2.1.1.-) (OMT) - Zea mays (Maize)moderately similar to ( 344) loc\_os06g16960 12006.m06409 protein O-methyltransferase ZRP4, putative seq=cds; coord=1:209119391..209120903:1; parent\_gene=GRMZM2G059465'

'weakly similar to ( 143) AT2G23810 | Symbols: TET8 | TET8 (TETRASPANIN8) | chr2:10135859-10137352 REVERSEweakly similar to ( 181) loc\_os08g34460 12008.m07435 protein senescence-associated protein DH, putative, expressed seq=cds; coord=1:210740384..210741599:1; parent\_gene=GRMZM2G059397'

'moderately similar to ( 274) AT1G74680 | Symbols: | exostosin family protein | chr1:28059528-28060984 FORWARDmoderately similar to ( 358) loc\_os08g34020 12008.m080169 protein secondary cell wall-related glycosyltransferase family 47, putative, expressed seq=cds; coord=1:212502284..212503936:-1; parent\_gene=GRMZM2G139355'

'very weakly similar to (86.7) AT1G09700 | Symbols: HYL1, DRB1 | HYL1 (HYPONASTIC LEAVES 1); double-stranded RNA binding / miRNA binding / protein binding | chr1:3137960-3140118 REVERSEweakly similar to ( 174) loc\_os08g29530 12008.m26677 protein RBP2 protein, putative, expressed seq=cds; coord=1:219369608..219375936:1; parent\_gene=GRMZM2G146111'

'weakly similar to ( 121) AT2G17950 | Symbols: WUS, PGA6, WUS1 | WUS (WUSCHEL); DNA binding / protein binding / transcription factor/ transcription regulator | chr2:7809100-7810671 REVERSEweakly similar to ( 122) WUS\_ANTMA Protein WUSCHEL (Protein ROSULATA) - Antirrhinum majus (Garden snapdragon)weakly similar to ( 186) loc\_os04g56780 12004.m10565 protein protein WUSCHEL, putative, expressed seq=cds; coord=2:3387696..3389171:1; parent\_gene=GRMZM2G047448'

'moderately similar to ( 263) AT4G32300 | Symbols: SD2-5 | SD2-5 (S-DOMAIN-2 5); carbohydrate binding / kinase/ protein kinase | chr4:15599970-15602435 FORWARDweakly similar to ( 177) KPRO\_MAIZE Putative receptor protein kinase ZmPK1 precursor (EC 2.7.11.1) - Zea mays (Maize)highly similar to ( 590) loc\_os04g56110 12004.m35493 protein ATP binding protein, putative, expressed seq=cds; coord=2:4512059..4514096:-1; parent\_gene=GRMZM2G059740'

'moderately similar to ( 268) AT4G36920 | Symbols: AP2, FLO2, FL1 | AP2 (APETALA 2); transcription factor | chr4:17400998-17403140 FORWARDweakly similar to ( 130) BBM2\_BRANA Protein BABY BOOM 2 (BnBBM2) - Brassica napus (Rape)moderately similar to ( 382) loc\_os04g55560 12004.m35488 protein AP2 domain containing protein, expressed seq=cds; coord=2:5514479..5518846:-1; parent\_gene=GRMZM2G174784'

'highly similar to ( 520) AT5G03250 | Symbols: | phototropic-responsive NPH3 family protein | chr5:774591-776855 FORWARDmoderately similar to ( 321) NPH3\_ORYSA Coleoptile phototropism protein 1 (Non-phototropic hypocotyl 3-like protein) (NPH3-like protein) - Oryza sativa (Rice)highly similar to ( 745) loc\_os04g54400 12004.m10331 protein transposon protein, putative, Mutator sub-class, expressed seq=cds; coord=2:6853850..6856978:-1; parent\_gene=GRMZM2G159161'

'highly similar to ( 513) AT4G24480 | Symbols: | serine/threonine protein kinase, putative | chr4:12650410-12654755 FORWARDvery weakly similar to (82.8) NORK\_MEDTR Nodulation receptor kinase precursor (EC 2.7.11.1) (Does not make infections protein 2) (Symbiosis receptor-like kinase) (MtSYMRK) - Medicago truncatula (Barrel medic)highly similar to ( 847) loc\_os04g52140 12004.m10109 protein protein kinase domain containing protein, expressed seq=cds; coord=2:10652142..10657319:-1; parent\_gene=GRMZM2G098187'

'nearly identical (1444) AT2G32730 | Symbols: | 26S proteasome regulatory subunit, putative | chr2:13880189-13885464 FORWARDnearly identical (1555) loc\_os08g12820 12008.m26623 protein 26S proteasome non-ATPase regulatory subunit 1, putative, expressed seq=cds; coord=2:11209985..11217603:1; parent\_gene=GRMZM2G102000'

'moderately similar to ( 251) AT1G32700 | Symbols: | zinc-binding family protein | chr1:11827986-11829444 FORWARDmoderately similar to ( 338) loc\_os04g50120 12004.m09944 protein expressed protein seq=cds; coord=2:13545639..13547834:1; parent\_gene=GRMZM2G131280'

'weakly similar to ( 120) AT4G17500 | Symbols: ATERF-1 | ATERF-1 (ETHYLENE RESPONSIVE ELEMENT BINDING FACTOR 1); DNA binding / transcription activator/ transcription factor | chr4:9759405-9760211 FORWARDweakly similar to ( 124) ERF2\_TOBAC Ethylene-responsive transcription factor 2 (Ethylene-responsive element-binding factor 2) (EREBP-2) (NtERF2) - Nicotiana tabacum (Common tobacco)moderately similar to ( 272) loc\_os04g46220 12004.m09573 protein ethylene-responsive transcription factor 2, putative, expressed seq=cds; coord=2:20723453..20724789:1; parent\_gene=GRMZM2G055180'

'highly similar to ( 640) AT3G15130 | Symbols: | pentatricopeptide (PPR) repeat-containing protein | chr3:5097153-5099222 REVERSEweakly similar to ( 104) RF1\_ORYSA Rf1 protein, mitochondrial precursor (PPR protein) (Fertility restorer) (Restorer for CMS) - Oryza sativa (Rice)highly similar to ( 998) loc\_os04g58980 12004.m10776 protein EMB2261, putative, expressed seq=cds; coord=2:24360634..24363095:1; parent\_gene=GRMZM2G447090'

'moderately similar to ( 473) AT4G24790 | Symbols: | ATP binding / DNA binding / DNA-directed DNA polymerase | chr4:12778222-12781345 FORWARDhighly similar to ( 870) loc\_os12g19180 12012.m05871 protein nucleoside-triphosphatase/ nucleotide binding protein, putative, expressed seq=cds; coord=2:36838775..36842537:-1; parent\_gene=GRMZM2G044989'

'weakly similar to ( 119) loc\_os09g31300 12009.m22140 protein helix-loop-helix DNA-binding domain containing protein, expressed seq=cds; coord=2:189701055..189703654:1; parent\_gene=GRMZM2G417597'

'weakly similar to ( 154) AT2G42200 | Symbols: SPL9 | SPL9 (SQUAMOSA PROMOTER BINDING PROTEIN-LIKE 9); transcription factor | chr2:17587601-17589451 FORWARDweakly similar to ( 114) SBP2\_ANTMA Squamosa promoter-binding protein 2 - Antirrhinum majus (Garden snapdragon)moderately similar to ( 281) loc\_os09g31438 12009.m06260 protein squamosa promoter-binding-like protein 9, putative, expressed seq=cds; coord=2:189838793..189842695:-1; parent\_gene=GRMZM2G126018'

'weakly similar to ( 190) AT5G64200 | Symbols: ATSC35, SC35 | ATSC35; RNA binding / nucleic acid binding / nucleotide binding | chr5:25681849-25683553 REVERSEmoderately similar to ( 208) loc\_os07g43050 12007.m079757 protein splicing factor, arginine/serine-rich 2, putative, expressed seq=cds; coord=2:212349126..212354040:1; parent\_gene=GRMZM2G077823'

'highly similar to ( 807) AT5G65700 | Symbols: BAM1 | BAM1 (BARELY ANY MERISTEM 1); ATP binding / kinase/ protein serine/threonine kinase | chr5:26281826-26284945 FORWARDmoderately similar to ( 233) RPK1\_IPONI Receptor-like protein kinase precursor (EC 2.7.11.1) - Ipomoea nil (Japanese morning glory) (Pharbitis nil)highly similar to ( 837) loc\_os03g56270 12003.m35431 protein receptor protein kinase CLAVATA1 precursor, putative, expressed seq=cds; coord=2:219017513..219023443:1; parent\_gene=GRMZM2G169681'

'moderately similar to ( 342) AT5G24400 | Symbols: emb2024 | emb2024 (embryo defective 2024); 6-phosphogluconolactonase/ catalytic | chr5:8330532-8331784 REVERSEmoderately similar to ( 464) loc\_os09g35970 12009.m06548 protein 6-phosphogluconolactonase, putative, expressed seq=cds; coord=2:220832473..220835451:-1; parent\_gene=GRMZM2G148769'

'very weakly similar to (94.0) AT2G35910 | Symbols: | zinc finger (C3HC4-type RING finger) family protein | chr2:15073225-15073878 REVERSEweakly similar to ( 108) loc\_os12g42540 12012.m08033 protein RING-H2 finger protein ATL2L, putative seq=cds; coord=3:88527498..88527953:1; parent\_gene=AC206768.3\_FG005'

'moderately similar to ( 258) AT4G38620 | Symbols: ATMYB4, MYB4 | MYB4; DNA binding / transcription factor | chr4:18053866-18054876 FORWARDmoderately similar to ( 256) MYB38\_MAIZE Myb-related protein Zm38 - Zea mays (Maize)moderately similar to ( 260) loc\_os11g07890 12011.m04985 protein transposon protein, putative, CACTA, En/Spm sub-class seq=cds; coord=3:140124295..140125490:1; parent\_gene=GRMZM2G041415'

'moderately similar to ( 394) AT2G41370 | Symbols: BOP2 | BOP2 (BLADE ON PETIOLE2); protein binding | chr2:17238019-17240203 REVERSEhighly similar to ( 516) loc\_os01g72020 12001.m43379 protein BOP2, putative, expressed seq=cds; coord=3:150049274..150052250:1; parent\_gene=GRMZM2G039867'

'moderately similar to ( 207) AT1G33430 | Symbols: | galactosyltransferase family protein | chr1:12124438-12126052 REVERSEmoderately similar to ( 233) loc\_os01g65590 12001.m12668 protein beta-1,3-galactosyltransferase sqv-2, putative, expressed seq=cds; coord=3:172444363..172446418:-1; parent\_gene=GRMZM2G431006'

'moderately similar to ( 318) AT5G58060 | Symbols: YKT61, ATYKT61, ATGP1 | YKT61 | chr5:23498277-23500128 FORWARDmoderately similar to ( 353) loc\_os01g64650 12001.m43292 protein VAMP-like protein YKT62, putative, expressed seq=cds; coord=3:175775929..175780870:-1; parent\_gene=GRMZM2G178244'

'highly similar to ( 661) AT2G39940 | Symbols: COI1 | COI1 (CORONATINE INSENSITIVE 1); protein binding / ubiquitin-protein ligase | chr2:16672848-16675486 REVERSEhighly similar to ( 988) loc\_os01g63420 12001.m43515 protein coronatine-insensitive protein 1, putative, expressed seq=cds; coord=3:178602863..178606881:-1; parent\_gene=GRMZM2G125411'

'highly similar to ( 740) AT1G65930 | Symbols: | isocitrate dehydrogenase, putative / NADP

'weakly similar to ( 163) AT5G55340 | Symbols: | long-chain-alcohol O-fatty-acyltransferase family protein / wax synthase family protein | chr5:22439985-22440986 REVERSEmoderately similar to ( 475) loc\_os01g46270 12001.m10825 protein wax synthase isoform 3, putative, expressed seq=cds; coord=3:213797343..213799289:-1; parent\_gene=GRMZM2G349407'

'weakly similar to ( 163) AT5G55340 | Symbols: | long-chain-alcohol O-fatty-acyltransferase family protein / wax synthase family protein | chr5:22439985-22440986 REVERSEmoderately similar to ( 475) loc\_os01g46270 12001.m10825 protein wax synthase isoform 3, putative, expressed seq=cds; coord=3:213797343..213799289:-1; parent\_gene=GRMZM2G349407'

'highly similar to ( 749) AT1G15500 | Symbols: ATNTT2 | ATNTT2; ATP:ADP antiporter | chr1:5326426-5328688 FORWARDhighly similar to ( 753) TLC1\_SOLTU Plastidic ATP/ADP-transporter - Solanum tuberosum (Potato)highly similar to ( 887) loc\_os01g45910 12001.m10791 protein plastidic ATP/ADP-transporter, putative, expressed seq=cds; coord=3:214471264..214476975:1; parent\_gene=GRMZM2G064473'

'moderately similar to ( 434) AT5G40850 | Symbols: UPM1 | UPM1 (UROPHORPHYRIN METHYLASE 1); uroporphyrin-III C-methyltransferase | chr5:16367205-16368724 FORWARDmoderately similar to ( 279) loc\_os01g44050 12001.m10664 protein siroheme synthase, putative, expressed seq=cds; coord=3:216593144..216597291:-1; parent\_gene=GRMZM2G105604'

'highly similar to ( 692) AT3G23430 | Symbols: PHO1, ATPHO1 | PHO1 (phosphate 1) | chr3:8387818-8393242 REVERSEnearly identical (1109) loc\_os02g56510 12002.m10672 protein phosphate transporter 1, putative, expressed seq=cds; coord=4:171917079..171922792:1; parent\_gene=GRMZM2G466545'

'moderately similar to ( 400) AT5G65685 | Symbols: | soluble glycogen synthase-related | chr5:26273252-26275864 REVERSEweakly similar to ( 189) SSY3\_SOLTU Soluble starch synthase 3, chloroplast precursor (EC 2.4.1.21) (SS III) (Soluble starch synthase III) - Solanum tuberosum (Potato)highly similar to ( 907) loc\_os02g56320 12002.m10655 protein glycogen synthase 2, putative, expressed seq=cds; coord=4:172606253..172677186:-1; parent\_gene=GRMZM2G130043'

'moderately similar to ( 400) AT5G65685 | Symbols: | soluble glycogen synthase-related | chr5:26273252-26275864 REVERSEweakly similar to ( 189) SSY3\_SOLTU Soluble starch synthase 3, chloroplast precursor (EC 2.4.1.21) (SS III) (Soluble starch synthase III) - Solanum tuberosum (Potato)highly similar to ( 907) loc\_os02g56320 12002.m10655 protein glycogen synthase 2, putative, expressed seq=cds; coord=4:172606253..172677186:-1; parent\_gene=GRMZM2G130043'

'highly similar to ( 933) AT4G29380 | Symbols: | protein kinase family protein / WD-40 repeat family protein | chr4:14458822-14464692 FORWARDnearly identical (1718) loc\_os02g55340 12002.m10560 protein HEAT repeat family protein, expressed seq=cds; coord=4:173805959..173816788:1; parent\_gene=GRMZM2G111491'

'weakly similar to ( 162) AT3G07830 | Symbols: | polygalacturonase, putative / pectinase, putative | chr3:2499454-2500966 REVERSEmoderately similar to ( 207) PGLR3\_MAIZE Exopolygalacturonase precursor (EC 3.2.1.67) (ExoPG) (Pectinase) (Galacturan 1,4-alpha-galacturonidase) - Zea mays (Maize)moderately similar to ( 208) loc\_os06g35370 12006.m08074 protein exopolygalacturonase precursor, putative, expressed seq=cds; coord=4:233223024..233225418:1; parent\_gene=GRMZM2G029566'

'moderately similar to ( 445) AT2G17220 | Symbols: | protein kinase, putative | chr2:7487866-7489768 REVERSEmoderately similar to ( 215) NORX\_MEDTR Nodulation receptor kinase precursor (EC 2.7.11.1) (Does not make infections protein 2) (Symbiosis receptor-like kinase) (MtSYMRLK) - Medicago truncatula (Barrel medic)highly similar to ( 573) loc\_os02g02600 12002.m05609 protein serine/threonine-protein kinase Cx32, chloroplast precursor, putative, expressed seq=cds; coord=4:239725555..239729685:1; parent\_gene=GRMZM2G025127'

'highly similar to ( 856) AT5G46920 | Symbols: | intron maturase, type II family protein | chr5:19053668-19055875 FORWARDweakly similar to ( 147) YMF11\_MARPO Hypothetical 83.1 kDa protein in COB-ATPA intergenic region (ORF 732) - Marchantia polymorpha (Liverwort)nearly identical (1159) loc\_os10g41790 12010.m065344 protein type II intron maturase family protein, expressed seq=cds; coord=5:1579..3920:-1; parent\_gene=GRMZM2G356204'

'very weakly similar to ( 100) AT3G25070 | Symbols: RIN4 | RIN4 (RPM1 INTERACTING PROTEIN 4); protein binding | chr3:9132458-9133747 FORWARDmoderately similar to ( 297) loc\_os03g63140 12003.m35534 protein nitrate-induced NOI protein, expressed seq=cds; coord=5:1060917..1063511:-1; parent\_gene=GRMZM2G012229'

'highly similar to ( 625) AT4G02510 | Symbols: TOC159, TOC86, PPI2, TOC160, ATTOC159 | TOC159 (TRANSLOCON AT THE OUTER ENVELOPE MEMBRANE OF CHLOROPLASTS 159); transmembrane receptor chr4:1104766-1109360 FORWARDweakly similar to ( 103) TOC34\_PEA Translocase of chloroplast 34 (EC 3.6.5.-) (34 kDa chloroplast outer envelope protein) (GTP-binding protein OEP34) (GTP-binding protein IAP34) - Pisum sativum (Garden pea)nearly identical (1082) loc\_os03g61890 12003.m35506 protein chloroplast protein import component Toc159, putative, expressed seq=cds; coord=5:1621055..1624641:-1; parent\_gene=GRMZM2G326272'

'weakly similar to ( 188) AT5G58490 | Symbols: | cinnamoyl-CoA reductase family | chr5:23643068-23644455 FORWARDweakly similar to ( 106) DFRA\_DIACA Dihydroflavonol-4-reductase (EC 1.1.1.219) (DFR) (Dihydrokaempferol 4-reductase) - Dianthus caryophyllus (Carnation) (Clove pink)moderately similar to ( 238) loc\_os03g60380 12003.m10928 protein dihydroflavonol-4-reductase, putative, expressed seq=cds; coord=5:2600634..2603545:-1; parent\_gene=GRMZM2G110881'

'moderately similar to ( 352) AT5G58490 | Symbols: | cinnamoyl-CoA reductase family | chr5:23643068-23644455 FORWARDweakly similar to ( 154) DFRA\_VITVI Dihydroflavonol-4-reductase (EC 1.1.1.219) (DFR) (Dihydrokaempferol 4-reductase) - Vitis vinifera (Grape)moderately similar to ( 441) loc\_os03g60380 12003.m10928 protein dihydroflavonol-4-reductase, putative, expressed seq=cds; coord=5:2705885..2708336:1; parent\_gene=GRMZM2G107076'



'highly similar to ( 998) AT1G17840 | Symbols: WBC11, ABCG11, DSO, COF1, ATWBC11 | WBC11 (WHITE-BROWN COMPLEX HOMOLOG PROTEIN 11); ATPase, coupled to transmembrane movement of substances / fatty acid transporter | chr1:6142870-6145894 FORWARDweakly similar to ( 186) PDR4\_ORYSA Pleiotropic drug resistance protein 4 - Oryza sativa (Rice)nearly identical (1100) loc\_os10g35180 12010.m06341 protein ATP-binding cassette sub-family G member 2, putative, expressed seq=cds; coord=5:25713468..25717083:1; parent\_gene=GRMZM2G177314'

'weakly similar to ( 123) AT1G56120 | Symbols: | kinase | chr1:20987288-20993072 REVERSEmoderately similar to ( 243) loc\_os11g28104 12011.m06728 protein protein kinase, putative, expressed seq=cds; coord=5:27198279..27204222:-1; parent\_gene=GRMZM2G102862'

'moderately similar to ( 236) AT1G73230 | Symbols: | nascent polypeptide-associated complex (NAC) domain-containing protein | chr1:27540506-27541364 REVERSEmoderately similar to ( 262) loc\_os10g34180 12010.m21923 protein transcription factor BTF3, putative, expressed seq=cds; coord=5:27393436..27396313:1; parent\_gene=GRMZM2G001887'

'moderately similar to ( 283) AT1G36730 | Symbols: | eukaryotic translation initiation factor 5, putative / eIF-5, putative | chr1:13898706-13900025 REVERSEhighly similar to ( 572) IF5\_MAIZE Eukaryotic translation initiation factor 5 (eIF-5) - Zea mays (Maize)highly similar to ( 536) loc\_os06g48350 12006.m09361 protein eukaryotic translation initiation factor 5, putative, expressed seq=cds; coord=5:28208919..28211750:1; parent\_gene=GRMZM2G369939'

'weakly similar to ( 177) AT1G25560 | Symbols: TEM1 | TEM1 (TEMPRANILLO 1); transcription factor | chr1:8981891-8982976 REVERSEmoderately similar to ( 265) loc\_os01g49830 12001.m11168 protein DNA-binding protein RAV1, putative, expressed seq=cds; coord=5:28639860..28641213:-1; parent\_gene=GRMZM2G018336'

'highly similar to ( 740) AT2G33340 | Symbols: | nucleotide binding / ubiquitin-protein ligase | chr2:14126703-14131000 REVERSEvery weakly similar to (95.5) PF20\_CHLRE Flagellar WD repeat protein PF20 - Chlamydomonas reinhardtiihighly similar to ( 927) loc\_os10g32880 12010.m21914 protein pre-mRNA-splicing factor 19, putative, expressed seq=cds; coord=5:30740679..30750954:1; parent\_gene=GRMZM2G324540'

'moderately similar to ( 436) AT4G10200 | Symbols: | hAT dimerisation domain-containing protein / transposase-related | chr4:6353172-6355591 FORWARDnearly identical (1079) loc\_os12g37830 12012.m07569 protein transposon protein, putative, Ac/Ds sub-class seq=cds; coord=5:31055094..31057648:-1; parent\_gene=GRMZM2G132595'

'weakly similar to ( 195) AT3G60830 | Symbols: ATARP7, ARP7 | ATARP7 (ACTIN-RELATED PROTEIN 7); structural constituent of cytoskeleton | chr3:22474298-22476000 FORWARDvery weakly similar to (82.4) ACT13\_SOLTU Actin-101 - Solanum tuberosum (Potato)weakly similar to ( 158) loc\_os03g56970 12003.m10616 protein ATARP7, putative, expressed seq=cds; coord=5:31818815..31828131:1; parent\_gene=GRMZM2G015861'

'moderately similar to ( 291) AT5G25120 | Symbols: CYP71B11 | CYP71B11; electron carrier/ heme binding / iron ion binding / monooxygenase/ oxygen binding | chr5:8662851-8664432 FORWARDmoderately similar to ( 356) C71DA\_SOYBN Cytochrome P450 71D10 (EC 1.14.-.-) - Glycine max (Soybean)highly similar to ( 526) loc\_os10g30390 12010.m05901 protein cytochrome P450 71D7, putative, expressed seq=cds; coord=5:31947869..31949808:-1; parent\_gene=GRMZM2G122654'

'highly similar to ( 571) AT3G51370 | Symbols: | protein phosphatase 2C, putative / PP2C, putative | chr3:19070387-19071975 FORWARDhighly similar to ( 716) loc\_os06g50380 12006.m31935 protein protein phosphatase 2C, putative, expressed seq=cds; coord=5:61837656..61842314:-1; parent\_gene=GRMZM2G069970'

'highly similar to ( 721) AT5G57800 | Symbols: FLP1, YRE, CER3, WAX2 | CER3 (ECERIFERUM 3); binding / catalytic/ iron ion binding / oxidoreductase | chr5:23420589-23423832 FORWARDhighly similar to ( 982) loc\_os02g08230 12002.m100034 protein g11 protein, putative, expressed seq=cds; coord=5:90341589..90347811:1; parent\_gene=GRMZM2G083526'

'moderately similar to ( 207) AT3G04530 | Symbols: PPCK2, PEPCK2 | PPCK2; kinase/ protein serine/threonine kinase | chr3:1221546-1222456 FORWARDweakly similar to ( 153) CDPK2\_ORYSA Calcium-dependent protein kinase, isoform 2 (EC 2.7.11.1) (CDPK 2) - Oryza sativa (Rice)moderately similar to ( 419) loc\_os02g41580 12002.m09194 protein calcium-dependent protein kinase 2, putative, expressed seq=cds; coord=5:186505821..186507490:1; parent\_gene=GRMZM2G096753'

'moderately similar to ( 361) AT5G47450 | Symbols: ATTIP2;3, TIP2;3, DELTA-TIP3 | AtTIP2;3; ammonia transporter/ methylammonium transmembrane transporter/ water channel | chr5:19248509-19249466 REVERSEmoderately similar to ( 422) TIP21\_ORYSA Probable aquaporin TIP2.1 (Tonoplast intrinsic protein 2.1) (OsTIP2.1) - Oryza sativa (Rice)moderately similar to ( 422) loc\_os02g44080 12002.m09443 protein aquaporin TIP2.1, putative, expressed seq=cds; coord=5:191910165..191911369:-1; parent\_gene=GRMZM2G056908'

'highly similar to ( 605) AT3G27740 | Symbols: CARA | CARA (CARBAMOYL PHOSPHATE SYNTHETASE A); carbamoyl-phosphate synthase (glutamine-hydrolyzing)/ carbamoyl-phosphate synthase/ catalytic | chr3:10281470-10283792 REVERSEhighly similar to ( 758) loc\_os02g47850 12002.m33834 protein carbamoyl-phosphate synthase small chain, putative, expressed seq=cds; coord=5:201452200..201457279:1; parent\_gene=GRMZM2G147450'

'highly similar to ( 914) AT5G35700 | Symbols: FIM2 | FIM2 (FIMBRIN-LIKE PROTEIN 2); actin binding | chr5:13872833-13876432 REVERSEnearly identical (1246) loc\_os02g48740 12002.m09908 protein fimbrin 1, putative, expressed seq=cds; coord=5:203620982..203625743:1; parent\_gene=GRMZM2G382341'

'weakly similar to ( 193) AT5G55050 | Symbols: | GDSL-motif lipase/hydrolase family protein | chr5:22337745-22339741 FORWARDweakly similar to ( 151) APG\_BRANA Anter-specific proline-rich protein APG (Protein CEX) (Fragment) - Brassica napus (Rape)highly similar to ( 518) loc\_os02g50690 12002.m10103 protein anther-specific proline-rich protein APG precursor, putative, expressed seq=cds; coord=5:205839220..205841246:-1; parent\_gene=GRMZM2G335280'

'weakly similar to ( 172) AT5G39865 | Symbols: | glutaredoxin family protein | chr5:15965560-15966732 REVERSEmoderately similar to ( 362) loc\_os02g51370 12002.m10171 protein glutaredoxin family protein, expressed seq=cds; coord=5:207655630..207657582:-1; parent\_gene=GRMZM2G118366'

'highly similar to ( 738) AT1G62830 | Symbols: LDL1, SWP1, ATSWP1 | LDL1 (LSD1-LIKE1); amine oxidase/ electron carrier/ oxidoreductase | chr1:23264638-23267172 REVERSEweakly similar to ( 107) PAO\_MAIZE Polyamine oxidase precursor (EC 1.5.3.11) - Zea mays (Maize)nearly identical (1155) loc\_os02g51880 12002.m10219 protein amine oxidase/ oxidoreductase, putative, expressed seq=cds; coord=5:208426880..208429748:1; parent\_gene=GRMZM2G059958'

'highly similar to ( 724) AT1G78240 | Symbols: TSD2, QUA2 | TSD2 (TUMOROUS SHOOT DEVELOPMENT 2); methyltransferase | chr1:29433173-29435815 REVERSEnearly identical (1119) loc\_os02g51860 12002.m10217 protein ATP binding protein, putative, expressed seq=cds; coord=5:208391972..208397053:-1; parent\_gene=GRMZM2G140893'

'moderately similar to ( 393) AT5G35370 | Symbols: | ATP binding / carbohydrate binding / kinase/ protein kinase/ protein serine/threonine kinase/ protein tyrosine kinase/ sugar binding | chr5:13588564-13591182 REVERSEmoderately similar to ( 206) KPRO\_MAIZE Putative receptor protein kinase ZmPK1 precursor (EC 2.7.11.1) - Zea mays (Maize)highly similar to ( 568) loc\_os02g52850 12002.m10315 protein ATP binding protein, putative, expressed seq=cds; coord=5:210043564..210046543:-1; parent\_gene=GRMZM2G058220'

'highly similar to ( 777) AT3G14067 | Symbols: | subtilase family protein | chr3:4658421-4660754 REVERSEnearly identical (1140) loc\_os02g53860 12002.m10415 protein subtilisin-like protease precursor, putative, expressed seq=cds; coord=5:212027167..212030047:-1; parent\_gene=GRMZM2G163749'

'highly similar to ( 777) AT3G14067 | Symbols: | subtilase family protein | chr3:4658421-4660754 REVERSEnearly identical (1140) loc\_os02g53860 12002.m10415 protein subtilisin-like protease precursor, putative, expressed seq=cds; coord=5:212027167..212030047:-1; parent\_gene=GRMZM2G163749'

'moderately similar to ( 477) AT1G02800 | Symbols: ATCEL2, CEL2 | ATCEL2; cellulase/ hydrolase, hydrolyzing O-glycosyl compounds | chr1:613386-616103 REVERSEhighly similar to ( 614) GUN19\_ORYSA Endoglucanase 19 precursor (EC 3.2.1.4) (Endo-1,4-beta glucanase 19) - Oryza sativa (Rice)highly similar to ( 614) loc\_os08g02220 12008.m04366 protein endoglucanase 1 precursor, putative, expressed seq=cds; coord=6:4015353..4017399:1; parent\_gene=GRMZM2G009025'

'weakly similar to ( 192) AT3G04720 | Symbols: PR4, HEL, PR-4 | PR4 (PATHOGENESIS-RELATED 4); chitin binding | chr3:1285691-1286531 REVERSEweakly similar to ( 198) BARW\_HORVU Barwin - Hordeum vulgare (Barley)moderately similar to ( 219) loc\_os11g37970 12011.m07644 protein win1 precursor, putative, expressed seq=cds; coord=6:11555672..11556724:-1; parent\_gene=GRMZM2G454556'

'weakly similar to ( 189) AT5G23960 | Symbols: ATTPS21, TPS21 | TPS21 (TERPENE SYNTHASE 21); (-)-E-beta-caryophyllene synthase/ alpha-humulene synthase | chr5:8092969-8095128 FORWARDmoderately similar to ( 233) DCS1\_GOSHI (

'moderately similar to ( 392) AT3G22110 | Symbols: PAC1 | PAC1; endopeptidase/ peptidase/ threonine-type endopeptidase | chr3:7792819-7793571 REVERSEmoderately similar to ( 447) PSA4B\_ORYSA Proteasome subunit alpha type 4-2 (EC 3.4.25.1) (20S proteasome alpha subunit C) (20S proteasome subunit alpha-3) - Oryza sativa (Rice)moderately similar to ( 447) loc\_os06g07140 12006.m05438 protein proteasome subunit alpha type 4, putative, expressed seq=cds; coord=6:80974657..80975832:-1; parent\_gene=GRMZM2G120047'

'highly similar to ( 629) AT4G22130 | Symbols: SRF8 | SRF8 (STRUBBELIG-RECEPTOR FAMILY 8); ATP binding / kinase/ protein binding / protein kinase | chr4:11724781-11727331 FORWARDmoderately similar to ( 202) PSKR\_DAUCA Phytosulfokine receptor precursor (EC 2.7.11.1) (Phytosulfokine LRR receptor kinase) - Daucus carota (Carrot)highly similar to ( 792) loc\_os02g09740 12002.m100127 protein receptor protein kinase TMK1 precursor, putative, expressed seq=cds; coord=6:97610091..97618916:1; parent\_gene=GRMZM2G162531'

'nearly identical (1068) AT1G70300 | Symbols: KUP6 | KUP6; potassium ion transmembrane transporter | chr1:26477993-26481233 REVERSEnearly identical (1291) HAK10\_ORYSA Potassium transporter 10 (OsHAK10) - Oryza sativa (Rice)nearly identical (1291) loc\_os06g42030 12006.m08735 protein potassium transporter 10, putative, expressed seq=cds; coord=6:97941833..97946553:1; parent\_gene=GRMZM2G146760'

'highly similar to ( 507) AT5G59810 | Symbols: ATSBT5.4, SBT5.4 | SBT5.4; identical protein binding / serine-type endopeptidase | chr5:24096895-24100387 REVERSEnearly identical (1123) loc\_os06g41880 12006.m08720 protein subtilisin-like protease precursor, putative, expressed seq=cds; coord=6:98026824..98031029:-1; parent\_gene=GRMZM2G073223'

'highly similar to ( 507) AT5G59810 | Symbols: ATSBT5.4, SBT5.4 | SBT5.4; identical protein binding / serine-type endopeptidase | chr5:24096895-24100387 REVERSEnearly identical (1123) loc\_os06g41880 12006.m08720 protein subtilisin-like protease precursor, putative, expressed seq=cds; coord=6:98026824..98031029:-1; parent\_gene=GRMZM2G073223'

'weakly similar to ( 117) loc\_os09g29700 12009.m06121 protein retrotransposon protein, putative, unclassified seq=cds; coord=6:98260609..98290821:1; parent\_gene=GRMZM2G082112'

'moderately similar to ( 293) AT4G17150 | Symbols: | unknown protein | chr4:9638591-9640983 FORWARDhighly similar to ( 522) loc\_os06g40730 12006.m08608 protein expressed protein seq=cds; coord=6:99884497..99890846:1; parent\_gene=GRMZM2G092895'

'very weakly similar to (81.3) AT3G58070 | Symbols: GIS | GIS (GLABROUS INFLORESCENCE STEMS); nucleic acid binding / transcription factor/ zinc ion binding | chr3:21506845-21507606 REVERSEweakly similar to ( 136) loc\_os06g10470 12006.m05765 protein zinc finger protein, putative seq=cds; coord=6:108970623..108971435:1; parent\_gene=GRMZM2G016744'

'weakly similar to ( 173) AT4G30930 | Symbols: NFD1 | NFD1 (NUCLEAR FUSION DEFECTIVE 1); RNA binding / structural constituent of ribosome | chr4:15050170-15051630 REVERSEvery weakly similar to (90.9) RK21\_SPIOL 50S ribosomal protein L21, chloroplast precursor (CL21) (CS-L7) - Spinacia oleracea (Spinach)moderately similar to ( 264) loc\_os05g48410 12005.m08912 protein 50S ribosomal protein L21, mitochondrial precursor, putative, expressed seq=cds; coord=6:163857872..163860907:-1; parent\_gene=GRMZM2G085675'

'weakly similar to ( 117) AT5G05550 | Symbols: | transcription factor | chr5:1639529-1640550 REVERSEmoderately similar to ( 332) loc\_os05g48690 12005.m83935 protein 6b-interacting protein 1, putative, expressed seq=cds; coord=6:164197747..164199562:1; parent\_gene=GRMZM2G157219'

'very weakly similar to (92.8) AT4G22220 | Symbols: ISU1, ATISU1 | ISU1; structural molecule | chr4:11759444-11760881 REVERSEvery weakly similar to (97.4) loc\_os01g47340 12001.m42683 protein nifU-like N-terminal domain-containing protein, mitochondrial precursor, putative, expressed seq=cds; coord=6:165206126..165207222:1; parent\_gene=GRMZM2G141252'

'moderately similar to ( 451) AT1G32450 | Symbols: NRT1.5 | NRT1.5 (NITRATE TRANSPORTER 1.5); nitrate transmembrane transporter/ transporter | chr1:11715337-11719807 REVERSEmoderately similar to ( 434) loc\_os02g46460 12002.m09683 protein peptide transporter PTR2, putative, expressed seq=cds; coord=7:25089776..25092351:-1; parent\_gene=GRMZM2G156794'

'moderately similar to ( 464) AT3G02875 | Symbols: ILR1 | ILR1 (IAA-LEUCINE RESISTANT 1); IAA-Leu conjugat hydrolase/ IAA-Phe conjugate hydrolase/ metallopeptidase | chr3:631993-633859 FORWARDhighly similar to ( 640) loc\_os07g14590 12007.m05904 protein IAA-amino acid hydrolase ILR1 precursor, putative, expressed seq=cds; coord=7:25903581..25911265:1; parent\_gene=GRMZM2G016958'

'weakly similar to ( 163) loc\_os07g14580 12007.m05903 protein dcp1-like decapping family protein, expressed seq=cds; coord=7:26227531..26234488:-1; parent\_gene=GRMZM2G144618'

'weakly similar to ( 108) loc\_os07g23450 12007.m06624 protein zinc finger, C2H2 type family protein seq=cds; coord=7:35363274..35363582:1; parent\_gene=GRMZM2G443109'

'very weakly similar to (94.7) AT1G29660 | Symbols: | GDLSL-motif lipase/hydrolase family protein | chr1:10371955-10373624 FORWARDweakly similar to ( 159) loc\_os06g50940 12006.m09618 protein anther-specific proline-rich protein APG precursor, putative, expressed seq=cds; coord=7:79970165..79972088:1; parent\_gene=GRMZM2G101117'

'highly similar to ( 778) AT1G07650 | Symbols: | leucine-rich repeat transmembrane protein kinase, putative | chr1:2359817-2366423 REVERSEmoderately similar to ( 227) NORX\_MEDTR Nodulation receptor kinase precursor (EC 2.7.11.1) (Does not make infections protein 2) (Symbiosis receptor-like kinase) (MtSYMVK) - Medicago truncatula (Barrel medic)nearly identical (1044) loc\_os09g17630 12009.m05021 protein receptor-like protein kinase 2, putative, expressed seq=cds; coord=7:94201889..94238627:1; parent\_gene=GRMZM2G011526'

'moderately similar to ( 263) AT2G28970 | Symbols: | leucine-rich repeat protein kinase, putative | chr2:12443919-12448163 FORWARDmoderately similar to ( 206) NORX\_MEDTR Nodulation receptor kinase precursor (EC 2.7.11.1) (Does not make infections protein 2) (Symbiosis receptor-like kinase) (MtSYMVK) - Medicago truncatula (Barrel medic)moderately similar to ( 427) loc\_os09g17910 12009.m05049 protein protein kinase, putative, expressed seq=cds; coord=7:95428215..95431847:-1; parent\_gene=GRMZM2G354621'

'moderately similar to ( 330) AT1G54320 | Symbols: | LEM3 (ligand-effect modulator 3) family protein / CDC50 family protein | chr1:20275732-20277793 REVERSEmoderately similar to ( 421) loc\_os09g38768 12009.m060069 protein cell division control protein 50, putative, expressed seq=cds; coord=7:145214640..145217247:-1; parent\_gene=GRMZM2G114704'

'weakly similar to ( 188) AT1G01750 | Symbols: ADF11 | ADF11 (ACTIN DEPOLYMERIZING FACTOR 11); actin binding | chr1:275528-276126 FORWARDmoderately similar to ( 251) ADF1\_MAIZE Actin-depolymerizing factor 1 (ADF 1) (ZmABP1) (ZmADF1) - Zea mays (Maize)moderately similar to ( 211) loc\_os07g30090 12007.m29171 protein actin-depolymerizing factor 1, putative, expressed seq=cds; coord=7:148879558..148880837:1; parent\_gene=GRMZM2G117603'

'highly similar to ( 709) AT3G03050 | Symbols: CSLD3, KJK, ATCSLD3 | CSLD3 (CELLULOSE SYNTHASE-LIKE D3); cellulose synthase/ transferase, transferring glycosyl groups | chr3:687873-691629 FORWARDnearly identical (1295) loc\_os07g36750 12007.m07925 protein CSLF3 - cellulose synthase-like family F; beta1,3;1,4 glucan synthase, expressed seq=cds; coord=7:156285428..156288692:1; parent\_gene=GRMZM2G339645'

'moderately similar to ( 241) AT5G07680 | Symbols: ANAC080 | ANAC080 (ARABIDOPSIS NAC DOMAIN CONTAINING PROTEIN 80); transcription factor | chr5:2436134-2437322 FORWARDmoderately similar to ( 230) NAC77\_ORYSA NAC domain-containing protein 77 (ONAC077) (ONAC300) - Oryza sativa (Rice)moderately similar to ( 298) loc\_os07g48550 12007.m09066 protein NAC domain-containing protein 21/22, putative, expressed seq=cds; coord=7:173738865..173740690:1; parent\_gene=GRMZM2G181605'

'moderately similar to ( 361) DCOR\_CAPAN Ornithine decarboxylase (EC 4.1.1.17) (ODC) (CaODC1) (CapODC) - Capsicum annuum (Bell pepper)highly similar to ( 547) loc\_os09g37120 12009.m06660 protein ornithine decarboxylase, putative, expressed seq=cds; coord=7:175174284..175176025:1; parent\_gene=GRMZM2G140824'

'moderately similar to ( 205) AT5G05140 | Symbols: | transcription elongation factor-related | chr5:1520353-1522297 FORWARDhighly similar to ( 598) loc\_os05g34210 12005.m07652 protein expressed protein seq=cds; coord=8:104616112..104619975:1; parent\_gene=GRMZM2G087451'

'highly similar to ( 523) AT5G58430 | Symbols: ATEXO70B1 | ATEXO70B1 (exocyst subunit EXO70 family protein B1); protein binding | chr5:23621460-23623334 REVERSEhighly similar to ( 998) loc\_os05g39610 12005.m083752 protein protein binding protein, putative, expressed seq=cds; coord=8:118678684..118681299:-1; parent\_gene=GRMZM2G065566'

'very weakly similar to (87.0) HD2C\_MAIZE Histone deacetylase 2c (HD2c) (Zm-HD2c) - Zea mays (Maize)very weakly similar to (87.4) loc\_os05g51830 12005.m09245 protein histone deacetylase 2b, putative, expressed seq=cds; coord=8:163180384..163182820:1; parent\_gene=AC183950.2\_FG003'

'highly similar to ( 518) AT5G14420 | Symbols: RGLG2 | RGLG2 (RING domain Ligase2); ubiquitin-protein ligase | chr5:4648355-4650563 REVERSEhighly similar to ( 614) loc\_os01g68060 12001.m12910 protein copine-6, putative, expressed seq=cds; coord=8:163281489..163285589:1; parent\_gene=GRMZM2G065893'

'highly similar to ( 518) AT5G14420 | Symbols: RGLG2 | RGLG2 (RING domain Ligase2); ubiquitin-protein ligase | chr5:4648355-4650563 REVERSEhighly similar to ( 614) loc\_os01g68060 12001.m12910 protein copine-6, putative, expressed seq=cds; coord=8:163281489..163285589:1; parent\_gene=GRMZM2G065893'

'highly similar to ( 518) AT5G14420 | Symbols: RGLG2 | RGLG2 (RING domain Ligase2); ubiquitin-protein ligase | chr5:4648355-4650563 REVERSEhighly similar to ( 614) loc\_os01g68060 12001.m12910 protein copine-6, putative, expressed seq=cds; coord=8:163281489..163285589:1; parent\_gene=GRMZM2G065893'

'moderately similar to ( 412) AT3G51270 | Symbols: | ATP binding / catalytic/ protein serine/threonine kinase | chr3:19033851-19036772 FORWARDmoderately similar to ( 450) loc\_os01g66520 12001.m12760 protein serine/threonine-protein kinase RIO2, putative, expressed seq=cds; coord=8:164737739..164742218:1; parent\_gene=GRMZM2G472991'

'moderately similar to ( 322) AT5G54630 | Symbols: | zinc finger protein-related | chr5:22192607-22194260 REVERSEhighly similar to ( 574) loc\_os01g57650 12001.m11914 protein nucleic acid binding protein, putative, expressed seq=cds; coord=8:171805293..171810996:1; parent\_gene=GRMZM2G139160'

'moderately similar to ( 322) AT5G54630 | Symbols: | zinc finger protein-related | chr5:22192607-22194260 REVERSEhighly similar to ( 574) loc\_os01g57650 12001.m11914 protein nucleic acid binding protein, putative, expressed seq=cds; coord=8:171805293..171810996:1; parent\_gene=GRMZM2G139160'

'moderately similar to ( 322) AT5G54630 | Symbols: | zinc finger protein-related | chr5:22192607-22194260 REVERSEhighly similar to ( 574) loc\_os01g57650 12001.m11914 protein nucleic acid binding protein, putative, expressed seq=cds; coord=8:171805293..171810996:1; parent\_gene=GRMZM2G139160'

'weakly similar to ( 172) AT4G39870 | Symbols: | FUNCTIONS IN: molecular\_function unknown; INVOLVED IN: biological\_process unknown; LOCATED IN: cellular\_component unknown; EXPRESSED IN: 23 plant structures; EXPRESSED DURING: 15 growth stages; CONTAINS InterPro DOMAIN/s: TLDc (InterPro:IPR006571); BEST Arabidopsis thaliana protein match is: unknown protein (TAIR:AT2G05590.2); Has 2018 Blast hits to 1865 proteins in 220 species: Archae - 0; Bacteria - 39; Metazoa - 1002; Fungi - 279; Plants - 129; Viruses - 34; Other Eukaryotes - 535 (source: NCBI BLINK). | chr4:18502234-18504275 FORWARDmoderately similar to ( 400) loc\_os06g11790 12006.m32019 protein oxidation resistance protein 1, putative, expressed seq=cds; coord=9:6051948..6065049:1; parent\_gene=GRMZM2G019291'

'moderately similar to ( 290) AT3G21350 | Symbols: | RNA polymerase transcriptional regulation mediator-related | chr3:7517106-7518587 FORWARDmoderately similar to ( 407) loc\_os06g11370 12006.m05854 protein RNA polymerase transcriptional regulation mediator, subunit 6, putative, expressed seq=cds; coord=9:7177254..7182212:-1; parent\_gene=GRMZM2G017537'

'moderately similar to ( 483) AT1G76680 | Symbols: OPR1, ATOPR1 | OPR1; 12-oxophytodienoate reductase | chr1:28776982-28778271 FORWARDhighly similar to ( 601) loc\_os06g11290 12006.m05846 protein 12-oxophytodienoate reductase 2, putative, expressed seq=cds; coord=9:7308153..7309906:1; parent\_gene=GRMZM2G000236'

'moderately similar to ( 483) AT1G76680 | Symbols: OPR1, ATOPR1 | OPR1; 12-oxophytodienoate reductase | chr1:28776982-28778271 FORWARDhighly similar to ( 601) loc\_os06g11290 12006.m05846 protein 12-oxophytodienoate reductase 2, putative, expressed seq=cds; coord=9:7308153..7309906:1; parent\_gene=GRMZM2G000236'

'very weakly similar to ( 100) AT2G22490 | Symbols: CYCD2;1, ATCYCD2;1 | CYCD2;1 (Cyclin D2;1); cyclin-dependent protein kinase regulator/ protein binding | chr2:9554157-9555873 REVERSEweakly similar to ( 136) loc\_os03g27420 12003.m08069 protein retrotransposon protein, putative, unclassified seq=cds; coord=9:9398191..9400228:1; parent\_gene=AC213896.2\_FG005'

'very weakly similar to ( 100) AT2G22490 | Symbols: CYCD2;1, ATCYCD2;1 | CYCD2;1 (Cyclin D2;1); cyclin-dependent protein kinase regulator/ protein binding | chr2:9554157-9555873 REVERSEweakly similar to ( 136) loc\_os03g27420 12003.m08069 protein retrotransposon protein, putative, unclassified seq=cds; coord=9:9398191..9400228:1; parent\_gene=AC213896.2\_FG005'

'moderately similar to ( 419) AT4G25160 | Symbols: | protein kinase family protein | chr4:12903360-12906669  
REVERSEweakly similar to ( 129) CRI4\_MAIZE Putative receptor protein kinase CRINKLY4 precursor (EC  
2.7.11.1) - Zea mays (Maize)highly similar to ( 580) loc\_os06g04880 12006.m31972 protein ATP binding protein,  
putative, expressed seq=cds; coord=9:20824694..20826403:1; parent\_gene=GRMZM2G433433'

'moderately similar to ( 419) AT4G25160 | Symbols: | protein kinase family protein | chr4:12903360-12906669  
REVERSEweakly similar to ( 129) CRI4\_MAIZE Putative receptor protein kinase CRINKLY4 precursor (EC  
2.7.11.1) - Zea mays (Maize)highly similar to ( 580) loc\_os06g04880 12006.m31972 protein ATP binding protein,  
putative, expressed seq=cds; coord=9:20824694..20826403:1; parent\_gene=GRMZM2G433433'

'moderately similar to ( 419) AT4G25160 | Symbols: | protein kinase family protein | chr4:12903360-12906669  
REVERSEweakly similar to ( 129) CRI4\_MAIZE Putative receptor protein kinase CRINKLY4 precursor (EC  
2.7.11.1) - Zea mays (Maize)highly similar to ( 580) loc\_os06g04880 12006.m31972 protein ATP binding protein,  
putative, expressed seq=cds; coord=9:20824694..20826403:1; parent\_gene=GRMZM2G433433'

'moderately similar to ( 237) AT2G46770 | Symbols: NST1, EMB2301, ANAC043 | EMB2301 (EMBRYO  
DEFECTIVE 2301); transcription activator/ transcription factor | chr2:19220917-19222822 REVERSEmoderately  
similar to ( 213) NAC76\_ORYSA NAC domain-containing protein 76 (ONAC076) - Oryza sativa (Rice)moderately  
similar to ( 300) loc\_os06g04090 12006.m05140 protein NAM protein, putative, expressed seq=cds;  
coord=9:23279027..23283429:-1; parent\_gene=GRMZM2G171395'

'very weakly similar to (83.2) ATCG00740 | Symbols: RPOA | RNA polymerase alpha subunit | chrC:77901-78890  
REVERSEvery weakly similar to ( 100) RPOA\_SACOF DNA-directed RNA polymerase alpha chain (EC 2.7.7.6)  
(PEP) (Plastid-encoded RNA polymerase subunit alpha) (RNA polymerase subunit alpha) - Saccharum officinarum  
(Sugarcane)very weakly similar to (97.4) loc\_os01g57944 12001.m97470 protein DNA-directed RNA polymerase  
alpha chain, putative, expressed seq=cds; coord=9:89546232..89546523:1; parent\_gene=GRMZM2G570791'

'moderately similar to ( 285) AT1G02170 | Symbols: LOL3, ATMCPB1, MCP1B, AMC1, ATMC1 | AMC1  
(METACASPASE 1); cysteine-type endopeptidase | chr1:411883-413426 FORWARDmoderately similar to ( 416)  
loc\_os03g27170 12003.m08047 protein LOL3, putative, expressed seq=cds; coord=9:120413925..120416480:-1;  
parent\_gene=GRMZM2G320206'

'moderately similar to ( 285) AT1G02170 | Symbols: LOL3, ATMCPB1, MCP1B, AMC1, ATMC1 | AMC1  
(METACASPASE 1); cysteine-type endopeptidase | chr1:411883-413426 FORWARDmoderately similar to ( 416)  
loc\_os03g27170 12003.m08047 protein LOL3, putative, expressed seq=cds; coord=9:120413925..120416480:-1;  
parent\_gene=GRMZM2G320206'

'moderately similar to ( 224) AT1G07140 | Symbols: SIRANBP | SIRANBP; Ran GTPase binding | chr1:2192360-  
2193688 REVERSEmoderately similar to ( 290) loc\_os03g18180 12003.m07243 protein ran-binding protein 1  
homolog c, putative, expressed seq=cds; coord=9:137487958..137491564:1; parent\_gene=GRMZM2G078933'



'moderately similar to ( 330) AT5G02100 | Symbols: UNE18, ORP3A | UNE18 (UNFERTILIZED EMBRYO SAC 18); oxysterol binding / sterol binding | chr5:413639-416016 FORWARDmoderately similar to ( 377) loc\_os03g16690 12003.m07102 protein oxysterol-binding protein homolog C2F12.05c, putative, expressed seq=cds; coord=9:139762641..139765741:-1; parent\_gene=GRMZM2G114126'

'weakly similar to ( 165) AT1G75050 | Symbols: | FUNCTIONS IN: molecular\_function unknown; INVOLVED IN: response to other organism; LOCATED IN: endomembrane system; EXPRESSED IN: 6 plant structures; EXPRESSED DURING: 4 anthesis, petal differentiation and expansion stage; CONTAINS InterPro DOMAIN/s: Thaumatin, conserved site (InterPro:IPR017949), Thaumatin, pathogenesis-related (InterPro:IPR001938); BEST Arabidopsis thaliana protein match is: ATLP-3 (TAIR:AT1G75030.1); Has 1070 Blast hits to 1056 proteins in 144 species: Archae - 0; Bacteria - 18; Metazoa - 48; Fungi - 48; Plants - 944; Viruses - 4; Other Eukaryotes - 8 (source: NCBI BLink). | chr1:28180116-28181062 FORWARDweakly similar to ( 116) TPIA\_MALDO Thaumatin-like protein 1a precursor (Allergen Mal d 2) (Mdt11) (Pathogenesis-related protein 5a) (PR-5a) - Malus domestica (Apple) (Malus sylvestris)moderately similar to ( 231) loc\_os03g13070 12003.m06753 protein pathogenesis-related protein 5 precursor, putative seq=cds; coord=9:145169449..145170513:-1; parent\_gene=GRMZM2G393507'

'weakly similar to ( 116) AT5G21430 | Symbols: | DNAJ heat shock N-terminal domain-containing protein | chr5:7222294-7223400 FORWARDweakly similar to ( 178) loc\_os12g31460 12012.m06955 protein heat shock protein binding protein, putative, expressed seq=cds; coord=10:18671024..18674301:1; parent\_gene=GRMZM2G068316'

'highly similar to ( 677) AT1G62340 | Symbols: ALE1, ALE | ALE1 (ABNORMAL LEAF-SHAPE 1); serine-type endopeptidase | chr1:23051123-23055656 REVERSEhighly similar to ( 547) loc\_os06g48650 12006.m091776 protein SLP3, putative, expressed seq=cds; coord=10:99522491..99525216:1; parent\_gene=GRMZM2G157313'

'weakly similar to ( 115) AT2G21045 | Symbols: | INVOLVED IN: aging; EXPRESSED IN: hypocotyl, root; CONTAINS InterPro DOMAIN/s: Rhodanese-like (InterPro:IPR001763); BEST Arabidopsis thaliana protein match is: unknown protein (TAIR:AT5G66170.2); Has 1919 Blast hits to 1917 proteins in 542 species: Archae - 34; Bacteria - 1258; Metazoa - 17; Fungi - 21; Plants - 115; Viruses - 0; Other Eukaryotes - 474 (source: NCBI BLink). | chr2:9027858-9028805 FORWARDweakly similar to ( 102) DIN1\_RAPSA Senescence-associated protein DIN1 - Raphanus sativus (Radish)weakly similar to ( 173) loc\_os04g17660 12004.m35123 protein senescence-associated protein DIN1, putative, expressed seq=cds; coord=10:102318701..102320375:-1; parent\_gene=AC204711.3\_FG003'

'moderately similar to ( 347) AT3G60800 | Symbols: | zinc finger (DHHC type) family protein | chr3:22467486-22469273 REVERSEmoderately similar to ( 416) loc\_os03g58960 12003.m35468 protein palmitoyltransferase ZDHHC20, putative, expressed seq=cds; coord=10:103198521..103217029:1; parent\_gene=GRMZM2G001265'

'moderately similar to ( 370) AT5G13430 | Symbols: | ubiquinol-cytochrome C reductase iron-sulfur subunit, mitochondrial, putative / Rieske iron-sulfur protein, putative | chr5:4305414-4307399 REVERSEmoderately similar to ( 490) UCRI\_MAIZE Ubiquinol-cytochrome c reductase iron-sulfur subunit, mitochondrial precursor (EC 1.10.2.2) (Rieske iron-sulfur protein) (RISP) - Zea mays (Maize)moderately similar to ( 451) loc\_os04g32660 12004.m08364 protein ubiquinol-cytochrome c reductase iron-sulfur subunit, mitochondrial precursor, putative, expressed seq=cds; coord=10:111776610..111779617:1; parent\_gene=GRMZM2G023194'

'moderately similar to ( 220) AT4G31550 | Symbols: WRKY11, ATWRKY11 | WRKY11; calmodulin binding / transcription factor | chr4:15290065-15291458 REVERSEmoderately similar to ( 355) loc\_os04g51560 12004.m10052 protein OsWRKY68 - Superfamily of rice TFs having WRKY and zinc finger domains, expressed seq=cds; coord=10:141270670..141272273:1; parent\_gene=GRMZM2G091331'

'very weakly similar to (87.0) AT5G43320 | Symbols: ckl8 | ckl8 (Casein Kinase I-like 8); ATP binding / kinase/ protein kinase/ protein serine/threonine kinase | chr5:17386043-17388941 REVERSEvery weakly similar to (93.2) loc\_os02g56560 12002.m77862 protein casein kinase I isoform delta-like, putative, expressed seq=cds; coord=10:143454604..143458499:-1; parent\_gene=GRMZM2G148506'

'highly similar to ( 765) AT5G20990 | Symbols: B73, SIR4, CNX, CHL6, CNX1 | B73; molybdenum ion binding | chr5:7128737-7133397 REVERSEhighly similar to ( 696) loc\_os04g56620 12004.m101683 protein molybdopterin biosynthesis CNX1 protein, putative, expressed seq=cds; coord=10:146668953..146673272:1; parent\_gene=GRMZM2G067176'

'highly similar to ( 565) AT5G05780 | Symbols: RPN8A, AE3, ATHMOV34 | RPN8A (RP NON-ATPASE SUBUNIT 8A) | chr5:1735862-1738176 FORWARDmoderately similar to ( 260) loc\_os04g56646 12004.m10553 protein expressed protein seq=cds; coord=10:146681843..146686842:1; parent\_gene=GRMZM2G368908'

'highly similar to ( 508) AT3G48990 | Symbols: | AMP-dependent synthetase and ligase family protein | chr3:18159031-18161294 REVERSEweakly similar to ( 128) 4CL1\_TOBAC 4-coumarate--CoA ligase 1 (EC 6.2.1.12) (4CL 1) (4-coumaroyl-CoA synthase 1) - Nicotiana tabacum (Common tobacco)highly similar to ( 606) loc\_os04g58710 12004.m35525 protein peroxisomal-coenzyme A synthetase, putative, expressed seq=cds; coord=10:148627784..148629933:-1; parent\_gene=GRMZM2G074759'

'weakly similar to ( 179) AT2G17700 | Symbols: | protein kinase family protein | chr2:7685778-7689278 REVERSEmoderately similar to ( 332) loc\_os04g59000 12004.m10778 protein ATP binding protein, putative, expressed seq=cds; coord=10:148977449..148980886:-1; parent\_gene=GRMZM2G104658'

'moderately similar to ( 297) AT1G76920 | Symbols: | F-box family protein (FBX3) | chr1:28892295-28893419 FORWARDweakly similar to ( 104) loc\_os04g59010 12004.m10779 protein F-box domain containing protein, expressed seq=cds; coord=10:148984717..148986879:-1; parent\_gene=GRMZM2G104882'

'moderately similar to ( 354) AT2G46950 | Symbols: CYP709B2 | CYP709B2; electron carrier/ heme binding / iron ion binding / monooxygenase/ oxygen binding | chr2:19289466-19291541 REVERSEmoderately similar to ( 296) C72A1\_CATRO Cytochrome P450 72A1 (EC 1.3.3.9) (CYPLXXII) (Secologanin synthase) (SLS) - Catharanthus roseus (Rosy periwinkle) (Madagascar periwinkle)moderately similar to ( 434) loc\_os01g24780 12001.m08944 protein cytochrome P450 72A1, putative, expressed seq=cds; coord=1:64148065..64150545:1; parent\_gene=GRMZM2G084407'

'weakly similar to ( 187) AT1G47290 | Symbols: AT3BETAHSD/D1 | AT3BETAHSD/D1 (3BETA-HYDROXYSTEROID-DEHYDROGENASE/DECARBOXYLASE ISOFORM 1); 3-beta-hydroxy-delta5-steroid dehydrogenase/ sterol-4-alpha-carboxylate 3-dehydrogenase (decarboxylating) | chr1:17336121-17339030 FORWARDmoderately similar to ( 389) loc\_os07g27470 12007.m07022 protein transposon protein, putative, CACTA, En/Spm sub-class seq=cds; coord=1:70041332..70063271:1; parent\_gene=GRMZM2G009435'

'weakly similar to ( 194) AT3G02550 | Symbols: LBD41 | LBD41 (LOB DOMAIN-CONTAINING PROTEIN 41) | chr3:536747-537650 REVERSEmoderately similar to ( 226) loc\_os01g32770 12001.m09596 protein seed specific protein Bn15D17A, putative, expressed seq=cds; coord=1:72351668..72352962:-1; parent\_gene=GRMZM2G060544'

'highly similar to ( 653) AT1G18580 | Symbols: GAUT11 | GAUT11 (Galacturonosyltransferase 11); polygalacturonate 4-alpha-galacturonosyltransferase | chr1:6396144-6398005 FORWARDhighly similar to ( 881) loc\_os03g30000 12003.m08261 protein transferase, transferring glycosyl groups, putative, expressed seq=cds; coord=1:72799953..72805415:-1; parent\_gene=AC177908.3\_FG002'

'moderately similar to ( 472) AT5G16120 | Symbols: | hydrolase, alpha/beta fold family protein | chr5:5265820-5267775 FORWARDhighly similar to ( 629) loc\_os10g04620 12010.m21823 protein catalytic/ hydrolase, putative, expressed seq=cds; coord=1:115405246..115408968:1; parent\_gene=GRMZM2G110198'

'moderately similar to ( 225) AT5G58420 | Symbols: | 40S ribosomal protein S4 (RPS4D) | chr5:23619599-23620896 FORWARDmoderately similar to ( 243) RS4\_MAIZE 40S ribosomal protein S4 - Zea mays (Maize)moderately similar to ( 234) loc\_os02g01560 12002.m05506 protein 40S ribosomal protein S4, putative, expressed seq=cds; coord=1:127558173..127560554:1; parent\_gene=GRMZM2G159228'

'highly similar to ( 619) AT1G53730 | Symbols: SRF6 | SRF6 (STRUBBELIG-RECEPTOR FAMILY 6); ATP binding / protein binding / protein kinase/ protein serine/threonine kinase | chr1:20061771-20065475 FORWARDweakly similar to ( 170) PSKR\_DAUCA Phytosulfokine receptor precursor (EC 2.7.11.1) (Phytosulfokine LRR receptor kinase) - Daucus carota (Carrot)highly similar to ( 932) loc\_os10g25090 12010.m05459 protein leucine-rich repeat transmembrane protein kinase 1, putative, expressed seq=cds; coord=1:141071460..141076910:-1; parent\_gene=GRMZM2G004572'

'weakly similar to ( 189) AT1G10030 | Symbols: ERG28 | ERG28 (Arabidopsis homolog of yeast ergosterol28) | chr1:3273972-3275631 FORWARDmoderately similar to ( 222) loc\_os12g43670 12012.m08141 protein erg28 like protein, expressed seq=cds; coord=1:179962460..179965637:1; parent\_gene=GRMZM2G093828'

'moderately similar to ( 278) AT4G08150 | Symbols: KNAT1, BP, BP1 | KNAT1 (KNOTTED-LIKE FROM ARABIDOPSIS THALIANA); transcription factor | chr4:5147969-5150610 REVERSEmoderately similar to ( 333) RSH1\_MAIZE Homeobox protein rough sheath 1 - Zea mays (Maize)moderately similar to ( 332) loc\_os07g03770 12007.m04847 protein homeobox protein rough sheath 1, putative, expressed seq=cds; coord=1:281820159..281827144:1; parent\_gene=GRMZM2G135447'

'moderately similar to ( 298) AT2G17380 | Symbols: AP19 | AP19; protein binding / protein transporter | chr2:7553122-7554887 FORWARDweakly similar to ( 158) AP2S1\_MAIZE AP-2 complex subunit sigma-1 (Clathrin coat assembly protein AP17) (Clathrin coat-associated protein AP17) (Plasma membrane adaptor AP-2 17 kDa protein) (Clathrin assembly protein 2 small chain) - Zea mays (Maize)moderately similar to ( 319) loc\_os03g57040 12003.m78897 protein AP-1 complex subunit sigma-2, putative, expressed seq=cds; coord=1:285060087..285064322:-1; parent\_gene=GRMZM2G361220'

'moderately similar to ( 298) AT2G17380 | Symbols: AP19 | AP19; protein binding / protein transporter | chr2:7553122-7554887 FORWARDweakly similar to ( 158) AP2S1\_MAIZE AP-2 complex subunit sigma-1 (Clathrin coat assembly protein AP17) (Clathrin coat-associated protein AP17) (Plasma membrane adaptor AP-2 17 kDa protein) (Clathrin assembly protein 2 small chain) - Zea mays (Maize)moderately similar to ( 319) loc\_os03g57040 12003.m78897 protein AP-1 complex subunit sigma-2, putative, expressed seq=cds; coord=1:285060087..285064322:-1; parent\_gene=GRMZM2G361220'

'moderately similar to ( 298) AT2G17380 | Symbols: AP19 | AP19; protein binding / protein transporter | chr2:7553122-7554887 FORWARDweakly similar to ( 158) AP2S1\_MAIZE AP-2 complex subunit sigma-1 (Clathrin coat assembly protein AP17) (Clathrin coat-associated protein AP17) (Plasma membrane adaptor AP-2 17 kDa protein) (Clathrin assembly protein 2 small chain) - Zea mays (Maize)moderately similar to ( 319) loc\_os03g57040 12003.m78897 protein AP-1 complex subunit sigma-2, putative, expressed seq=cds; coord=1:285060087..285064322:-1; parent\_gene=GRMZM2G361220'

'highly similar to ( 607) AT1G30510 | Symbols: ATRFNR2 | ATRFNR2 (ROOT FNR 2); FAD binding / NADP or NADPH binding / electron carrier/ ferredoxin-NADP

'moderately similar to ( 344) AT3G18620 | Symbols: | zinc finger (DHHC type) family protein | chr3:6408849-6410716 FORWARDhighly similar to ( 597) loc\_os06g20400 12006.m31797 protein DHHC zinc finger domain containing protein, expressed seq=cds; coord=2:1971151..1974602:-1; parent\_gene=GRMZM2G068177'

'moderately similar to ( 358) AT3G19850 | Symbols: | phototropic-responsive NPH3 family protein | chr3:6898383-6901157 REVERSEweakly similar to ( 109) NPH3\_ORYSA Coleoptile phototropism protein 1 (Non-phototropic hypocotyl 3-like protein) (NPH3-like protein) - Oryza sativa (Rice)highly similar to ( 691) loc\_os04g57800 12004.m10665 protein photoreceptor-interacting protein-like, putative, expressed seq=cds; coord=2:2034098..2037473:1; parent\_gene=GRMZM2G040115'

'highly similar to ( 687) AT5G37020 | Symbols: ARF8 | ARF8 (AUXIN RESPONSE FACTOR 8); transcription factor | chr5:14630151-14633916 FORWARDnearly identical (1283) loc\_os04g57610 12004.m35224 protein auxin response factor 8, putative, expressed seq=cds; coord=2:2266715..2274671:1; parent\_gene=GRMZM2G078274'

'highly similar to ( 504) AT5G55280 | Symbols: FTSZ1-1, ATFTSZ1-1, CPFTSZ | FTSZ1-1; protein binding / structural molecule | chr5:22420740-22422527 REVERSEhighly similar to ( 571) loc\_os04g56970 12004.m35221 protein cell division protein ftsZ homolog, chloroplast precursor, putative, expressed seq=cds; coord=2:3176470..3180187:1; parent\_gene=GRMZM2G119773'

'nearly identical (1071) AT1G76950 | Symbols: PRAF1 | PRAF1; Ran GTPase binding / chromatin binding / zinc ion binding | chr1:28906952-28911325 FORWARDnearly identical (1565) loc\_os04g58960 12004.m10775 protein ran GTPase binding protein, putative, expressed seq=cds; coord=2:24030713..24037024:-1; parent\_gene=GRMZM2G124371'

'nearly identical (1071) AT1G76950 | Symbols: PRAF1 | PRAF1; Ran GTPase binding / chromatin binding / zinc ion binding | chr1:28906952-28911325 FORWARDnearly identical (1565) loc\_os04g58960 12004.m10775 protein ran GTPase binding protein, putative, expressed seq=cds; coord=2:24030713..24037024:-1; parent\_gene=GRMZM2G124371'

'weakly similar to ( 181) AT1G21140 | Symbols: | nodulin, putative | chr1:7404464-7405066 FORWARDweakly similar to ( 125) NO21\_SOYBN Nodulin 21 (N-21) - Glycine max (Soybean)moderately similar to ( 204) loc\_os04g59020 12004.m10780 protein integral membrane protein, expressed seq=cds; coord=2:24387828..24389072:1; parent\_gene=GRMZM2G434557'

'weakly similar to ( 133) AT3G44260 | Symbols: | CCR4-NOT transcription complex protein, putative | chr3:15952213-15953055 REVERSEmoderately similar to ( 209) loc\_os10g03530 12010.m03770 protein CCR4-NOT transcription complex subunit 7, putative seq=cds; coord=2:24450176..24451317:-1; parent\_gene=GRMZM2G064124'

'moderately similar to ( 261) AT1G71930 | Symbols: VND7, ANAC030 | VND7 (VASCULAR RELATED NAC-DOMAIN PROTEIN 7); transcription activator/ transcription factor/ transcription regulator | chr1:27076205-27077829 FORWARDmoderately similar to ( 212) NAC76\_ORYSA NAC domain-containing protein 76 (ONAC076) - Oryza sativa (Rice)moderately similar to ( 304) loc\_os08g01330 12008.m04282 protein ANAC030, putative, expressed seq=cds; coord=2:25745084..25746893:-1; parent\_gene=AC212859.3\_FG008'

'moderately similar to ( 261) AT1G71930 | Symbols: VND7, ANAC030 | VND7 (VASCULAR RELATED NAC-DOMAIN PROTEIN 7); transcription activator/ transcription factor/ transcription regulator | chr1:27076205-27077829 FORWARDmoderately similar to ( 212) NAC76\_ORYSA NAC domain-containing protein 76 (ONAC076) - Oryza sativa (Rice)moderately similar to ( 304) loc\_os08g01330 12008.m04282 protein ANAC030, putative, expressed seq=cds; coord=2:25745084..25746893:-1; parent\_gene=AC212859.3\_FG008'

'moderately similar to ( 376) AT3G52210 | Symbols: | mRNA capping enzyme family protein | chr3:19367035-19369293 FORWARDhighly similar to ( 541) MCES2\_ORYSA mRNA cap guanine-N7 methyltransferase 2 (EC 2.1.1.56) (mRNA (guanine-N(7)-)-methyltransferase 2) (mRNA cap methyltransferase 2) - Oryza sativa (Rice)highly similar to ( 541) loc\_os02g54000 12002.m10429 protein S-adenosylmethionine-dependent methyltransferase/ catalytic, putative, expressed seq=cds; coord=2:26771301..26774601:-1; parent\_gene=GRMZM2G171410'

'moderately similar to ( 207) AT5G23230 | Symbols: NIC2 | NIC2 (NICOTINAMIDASE 2); catalytic/ nicotinamidase | chr5:7826005-7826601 REVERSEmoderately similar to ( 330) loc\_os04g44420 12004.m09401 protein isochorismatase, putative, expressed seq=cds; coord=2:26875237..26876162:1; parent\_gene=GRMZM2G362413'

'highly similar to ( 547) AT1G22360 | Symbols: AtUGT85A2 | AtUGT85A2 (UDP-glucosyl transferase 85A2); UDP-glycosyltransferase/ glucuronosyltransferase/ transferase, transferring glycosyl groups | chr1:7895068-7897527 REVERSEweakly similar to ( 200) IAAG\_MAIZE Indole-3-acetate beta-glucosyltransferase (EC 2.4.1.121) (IAA-Glu synthetase) ((Uridine 5'-diphosphate-glucose:indol-3-ylacetyl)-beta-D-glucosyl transferase) - Zea mays (Maize)highly similar to ( 806) loc\_os04g37820 12004.m08771 protein cytokinin-O-glucosyltransferase 2, putative, expressed seq=cds; coord=2:43708019..43710470:-1; parent\_gene=GRMZM2G009125'

'weakly similar to ( 145) AT1G77490 | Symbols: TAPX | TAPX (THYLAKOIDAL ASCORBATE PEROXIDASE); L-ascorbate peroxidase | chr1:29117688-29120046 FORWARDweakly similar to ( 161) APX6\_ORYSA Probable L-ascorbate peroxidase 6, chloroplast precursor (EC 1.11.1.11) (OsAPx06) - Oryza sativa (Rice)weakly similar to ( 161) loc\_os12g07820 12012.m04769 protein OsAPx6 - Stromal Ascorbate Peroxidase encoding gene, expressed seq=cds; coord=2:178407364..178411287:-1; parent\_gene=GRMZM2G557799'

'moderately similar to ( 383) AT3G05840 | Symbols: ATSK12 | ATSK12; protein kinase/ protein serine/threonine kinase | chr3:1740793-1742927 FORWARDmoderately similar to ( 384) MSK3\_MEDSA Glycogen synthase kinase-3 homolog MsK-3 (EC 2.7.11.1) - Medicago sativa (Alfalfa)moderately similar to ( 410) loc\_os01g14860 12001.m43459 protein glycogen synthase kinase-3 homolog MsK-3, putative, expressed seq=cds; coord=3:13917982..13919834:-1; parent\_gene=GRMZM2G129482'

'highly similar to ( 580) AT5G02310 | Symbols: PRT6 | PRT6 (PROTEOLYSIS 6); ubiquitin-protein ligase | chr5:474279-482552 FORWARDnearly identical (1182) loc\_os01g05500 12001.m42863 protein zinc finger in N-recogin family protein, putative, expressed seq=cds; coord=3:17635017..17643029:-1; parent\_gene=GRMZM2G438938'

'weakly similar to ( 152) AT1G53540 | Symbols: | 17.6 kDa class I small heat shock protein (HSP17.6C-CI) (AA 1-156) | chr1:19980510-19980983 FORWARDweakly similar to ( 179) HSP11\_ORYSA 16.9 kDa class I heat shock protein 1 - Oryza sativa (Rice)weakly similar to ( 179) loc\_os01g04370 12001.m07072 protein 16.9 kDa class I heat shock protein 1, putative, expressed seq=cds; coord=3:20425735..20426696:-1; parent\_gene=GRMZM2G437100'

'moderately similar to ( 291) AT3G03440 | Symbols: | armadillo/beta-catenin repeat family protein | chr3:815709-818568 FORWARDmoderately similar to ( 412) loc\_os01g02200 12001.m06862 protein ubiquitin-protein ligase, putative, expressed seq=cds; coord=3:28221287..28223015:1; parent\_gene=AC183315.4\_FG006'

'weakly similar to ( 115) AT2G34840 | Symbols: | coatomer protein epsilon subunit family protein / COPE family protein | chr2:14702932-14704165 FORWARDweakly similar to ( 135) loc\_os04g52270 12004.m10122 protein coatomer subunit epsilon, putative, expressed seq=cds; coord=3:146776926..146781146:-1; parent\_gene=GRMZM2G016368'

'highly similar to ( 684) AT2G38110 | Symbols: ATPAT6, GPAT6 | GPAT6 (GLYCEROL-3-PHOSPHATE ACYLTRANSFERASE 6); 1-acylglycerol-3-phosphate O-acyltransferase/ acyltransferase | chr2:15952816-15955364 REVERSEhighly similar to ( 835) loc\_os01g63580 12001.m12474 protein glycerol-3-phosphate acyltransferase 8, putative, expressed seq=cds; coord=3:178181704..178185282:1; parent\_gene=GRMZM2G083195'

'highly similar to ( 505) AT1G53240 | Symbols: | malate dehydrogenase (NAD), mitochondrial | chr1:19854966-19856802 REVERSEhighly similar to ( 508) MDHM\_FRAAN Malate dehydrogenase, mitochondrial precursor (EC 1.1.1.37) - Fragaria ananassa (Strawberry)highly similar to ( 587) loc\_os01g46070 12001.m10806 protein malate dehydrogenase, mitochondrial precursor, putative, expressed seq=cds; coord=3:213896741..213905427:1; parent\_gene=GRMZM2G466833'

'moderately similar to ( 245) AT5G14740 | Symbols: CA2, CA18, BETA CA2 | CA2 (CARBONIC ANHYDRASE 2); carbonate dehydratase/ zinc ion binding | chr5:4758257-4762315 FORWARDmoderately similar to ( 340) CAHC\_HORVU Carbonic anhydrase, chloroplast precursor (EC 4.2.1.1) (Carbonate dehydratase) - Hordeum vulgare (Barley)moderately similar to ( 340) loc\_os01g45274 12001.m150428 protein carbonic anhydrase, chloroplast precursor, putative, expressed seq=cds; coord=3:215466579..215473931:-1; parent\_gene=GRMZM2G121878'

'moderately similar to ( 245) AT5G14740 | Symbols: CA2, CA18, BETA CA2 | CA2 (CARBONIC ANHYDRASE 2); carbonate dehydratase/ zinc ion binding | chr5:4758257-4762315 FORWARDmoderately similar to ( 340) CAHC\_HORVU Carbonic anhydrase, chloroplast precursor (EC 4.2.1.1) (Carbonate dehydratase) - Hordeum vulgare (Barley)moderately similar to ( 340) loc\_os01g45274 12001.m150428 protein carbonic anhydrase, chloroplast precursor, putative, expressed seq=cds; coord=3:215466579..215473931:-1; parent\_gene=GRMZM2G121878'

'moderately similar to ( 357) AT5G14260 | Symbols: | SET domain-containing protein | chr5:4601139-4603873 FORWARDmoderately similar to ( 451) loc\_os12g13460 12012.m05319 protein SET domain containing protein, expressed seq=cds; coord=3:215527347..215532128:-1; parent\_gene=GRMZM2G047695'

'weakly similar to ( 183) AT3G27810 | Symbols: ATMYB21, ATMYB3, MYB21 | ATMYB21 (ARABIDOPSIS THALIANA MYB DOMAIN PROTEIN 21); DNA binding / transcription factor | chr3:10307596-10310093 FORWARDweakly similar to ( 148) MYBA2\_ORYSA Myb-related protein MYBAS2 - Oryza sativa (Rice)moderately similar to ( 218) loc\_os01g45090 12001.m10715 protein transcription factor MYB21, putative, expressed seq=cds; coord=3:215849697..215850742:-1; parent\_gene=GRMZM2G143328'

'weakly similar to ( 183) AT3G27810 | Symbols: ATMYB21, ATMYB3, MYB21 | ATMYB21 (ARABIDOPSIS THALIANA MYB DOMAIN PROTEIN 21); DNA binding / transcription factor | chr3:10307596-10310093 FORWARDweakly similar to ( 148) MYBA2\_ORYSA Myb-related protein MYBAS2 - Oryza sativa (Rice)moderately similar to ( 218) loc\_os01g45090 12001.m10715 protein transcription factor MYB21, putative, expressed seq=cds; coord=3:215849697..215850742:-1; parent\_gene=GRMZM2G143328'

'moderately similar to ( 494) AT3G14680 | Symbols: CYP72A14 | CYP72A14; electron carrier/ heme binding / iron ion binding / monooxygenase/ oxygen binding | chr3:4934478-4936462 FORWARDmoderately similar to ( 448) C72A1\_CATRO Cytochrome P450 72A1 (EC 1.3.3.9) (CYPLXXII) (Secologanin synthase) (SLS) - Catharanthus roseus (Rosy periwinkle) (Madagascar periwinkle)highly similar to ( 776) loc\_os01g43844 12001.m97528 protein cytochrome P450 72A1, putative, expressed seq=cds; coord=3:216986019..216989235:-1; parent\_gene=GRMZM2G370745'

'weakly similar to ( 178) AT3G24520 | Symbols: AT-HSFC1, HSFC1 | AT-HSFC1; DNA binding / transcription factor | chr3:8941455-8942531 FORWARDmoderately similar to ( 332) loc\_os01g43590 12001.m42682 protein heat shock factor protein HSF8, putative, expressed seq=cds; coord=3:217357921..217359731:-1; parent\_gene=GRMZM2G089525'

'very weakly similar to ( 100) AT3G06190 | Symbols: ATBPM2, BPM2 | BPM2 (BTB-POZ AND MATH DOMAIN 2); protein binding | chr3:1874577-1876575 REVERSEweakly similar to ( 144) loc\_os08g13000 12008.m05427 protein speckle-type POZ protein, putative seq=cds; coord=4:25991768..25992949:-1; parent\_gene=GRMZM2G026724'

'weakly similar to ( 146) AT1G74700 | Symbols: NUZ, TRZ1 | TRZ1 (TRNASE Z 1); 3'-tRNA processing endoribonuclease | chr1:28065345-28067130 FORWARDweakly similar to ( 192) RNZN\_WHEAT Nuclear ribonuclease Z (EC 3.1.26.11) (RNase Z) (tRNase Z) (tRNA 3 endonuclease) (Zinc phosphodiesterase ELAC) (Fragment) - Triticum aestivum (Wheat)weakly similar to ( 181) loc\_os02g12290 12002.m06477 protein nuclear ribonuclease Z, putative seq=cds; coord=4:33914057..33918460:-1; parent\_gene=GRMZM2G394747'

'moderately similar to ( 473) AT3G20740 | Symbols: FIE, FIS3, FIE1 | FIE (FERTILIZATION-INDEPENDENT ENDOSPERM); nucleotide binding / transcription factor/ transcription regulator | chr3:7249064-7252254 REVERSEhighly similar to ( 847) FIE1\_MAIZE Polycomb group protein FIE1 (FERTILIZATION-INDEPENDENT ENDOSPERM 1) - Zea mays (Maize)highly similar to ( 567) loc\_os08g04270 12008.m26569 protein polycomb group protein FIE2, putative, expressed seq=cds; coord=4:35757180..35763186:-1; parent\_gene=GRMZM2G118205'  
'weakly similar to ( 118) loc\_os08g03590 12008.m04503 protein expressed protein seq=cds; coord=4:36308276..36310775:1; parent\_gene=GRMZM2G390489'

'moderately similar to ( 263) AT3G18430 | Symbols: | calcium-binding EF hand family protein | chr3:6326180-6327476 FORWARDmoderately similar to ( 317) loc\_os02g55880 12002.m10612 protein calcineurin subunit B, putative, expressed seq=cds; coord=4:173371823..173374012:-1; parent\_gene=GRMZM2G125838'

'moderately similar to ( 399) AT1G77800 | Symbols: | PHD finger family protein | chr1:29253800-29260190 FORWARDhighly similar to ( 842) loc\_os02g52960 12002.m10326 protein PHD-finger family protein, expressed seq=cds; coord=4:178229465..178238103:1; parent\_gene=GRMZM2G475583'

'weakly similar to ( 150) loc\_os02g52990 12002.m10329 protein OsSAUR12 - Auxin-responsive SAUR gene family member, expressed seq=cds; coord=4:178244180..178245465:1; parent\_gene=GRMZM2G475683'

'weakly similar to ( 190) AT2G22540 | Symbols: SVP, AGL22 | SVP (SHORT VEGETATIVE PHASE); transcription factor/ translation repressor, nucleic acid binding | chr2:9580417-9583603 FORWARDmoderately similar to ( 308) MAD22\_ORYSA MADS-box transcription factor 22 (OsMADS22) - Oryza sativa (Rice)moderately similar to ( 308) loc\_os02g52340 12002.m10265 protein MADS-box transcription factor 22, putative, expressed seq=cds; coord=4:178887359..178894404:-1; parent\_gene=GRMZM2G370777'

'weakly similar to ( 140) AT5G38280 | Symbols: PR5K | PR5K; kinase/ transmembrane receptor protein serine/threonine kinase | chr5:15293325-15295838 REVERSEvery weakly similar to (94.4) KPRO\_MAIZE Putative receptor protein kinase ZmpPK1 precursor (EC 2.7.11.1) - Zea mays (Maize)moderately similar to ( 270) loc\_os01g02730 12001.m06913 protein TAK14, putative, expressed seq=cds; coord=5:167603689..167605451:-1; parent\_gene=GRMZM2G496370'

'weakly similar to ( 105) AT4G39070 | Symbols: | zinc finger (B-box type) family protein | chr4:18205061-18206421 REVERSEweakly similar to ( 141) loc\_os02g43170 12002.m09352 protein salt tolerance-like protein, putative, expressed seq=cds; coord=5:190052115..190053687:1; parent\_gene=GRMZM2G110541'

'moderately similar to ( 329) AT1G69530 | Symbols: ATEXPA1, EXP1, AT-EXP1, ATEXP1, ATHEXP ALPHA 1.2 | ATEXPA1 (ARABIDOPSIS THALIANA EXPANSIN A1) | chr1:26142034-26143200 FORWARDmoderately similar to ( 395) EXPA5\_ORYSA Expansin-A5 precursor (OsEXPA5) (Alpha-expansin-5) (OsEXP5) (OsaEXPa1.20) - Oryza sativa (Rice)moderately similar to ( 395) loc\_os02g51040 12002.m10138 protein alpha-expansin 15 precursor, putative, expressed seq=cds; coord=5:206838596..206840547:1; parent\_gene=GRMZM2G105844'



'moderately similar to ( 329) AT1G69530 | Symbols: ATEXPA1, EXP1, AT-EXP1, ATEXP1, ATHEXP ALPHA 1.2 | ATEXPA1 (ARABIDOPSIS THALIANA EXPANSIN A1) | chr1:26142034-26143200 FORWARDmoderately similar to ( 395) EXPA5\_ORYSA Expansin-A5 precursor (OsEXPA5) (Alpha-expansin-5) (OsEXP5) (OsaEXPa1.20) - Oryza sativa (Rice)moderately similar to ( 395) loc\_os02g51040 12002.m10138 protein alpha-expansin 15 precursor, putative, expressed seq=cds; coord=5:206838596..206840547:1; parent\_gene=GRMZM2G105844'

'moderately similar to ( 330) AT1G26870 | Symbols: FEZ, ANAC009 | FEZ (FEZ); transcription factor | chr1:9312856-9314983 FORWARDweakly similar to ( 194) NAC68\_ORYSA NAC domain-containing protein 68 (ONAC068) - Oryza sativa (Rice)moderately similar to ( 338) loc\_os08g33910 12008.m07381 protein NAC domain-containing protein 9, putative, expressed seq=cds; coord=5:206975367..206978937:1; parent\_gene=GRMZM2G100593'

'weakly similar to ( 140) AT5G27420 | Symbols: | zinc finger (C3HC4-type RING finger) family protein | chr5:9684119-9685225 FORWARDvery weakly similar to (83.2) EL5\_ORYSA E3 ubiquitin-protein ligase EL5 (EC 6.3.2.-) - Oryza sativa (Rice)moderately similar to ( 263) loc\_os02g52210 12002.m10252 protein RING/C3HC4/PHD zinc finger-like protein, putative, expressed seq=cds; coord=5:208925097..208929323:1; parent\_gene=GRMZM2G323013'

'weakly similar to ( 192) AT5G64350 | Symbols: FKBP12, ATFKBP12 | FKBP12 (FK506-BINDING PROTEIN); FK506 binding / peptidyl-prolyl cis-trans isomerase | chr5:25734810-25735990 REVERSEmoderately similar to ( 201) FKB12\_VICFA Peptidyl-prolyl isomerase FKBP12 (EC 5.2.1.8) (12 kDa FK506-binding protein) (12 kDa FKBP) (FKBP-12) (Immunophilin FKBP12) (Peptidyl-prolyl cis-trans isomerase) (PPIase) (Rotamase) - Vicia faba (Broad bean)moderately similar to ( 218) loc\_os02g52290 12002.m10260 protein peptidyl-prolyl isomerase FKBP12, putative, expressed seq=cds; coord=5:209262549..209264524:-1; parent\_gene=GRMZM2G015784'

'weakly similar to ( 196) AT2G24060 | Symbols: | translation initiation factor 3 (IF-3) family protein | chr2:10229453-10231390 FORWARDmoderately similar to ( 310) loc\_os02g55120 12002.m10538 protein translation initiation factor IF-3, chloroplast precursor, putative, expressed seq=cds; coord=5:213363147..213366325:-1; parent\_gene=GRMZM2G119691'

'moderately similar to ( 251) AT1G09390 | Symbols: | GDSL-motif lipase/hydrolase family protein | chr1:3031264-3033415 FORWARDweakly similar to ( 167) EST\_HEVBR Esterase precursor (EC 3.1.1.-) (Early nodule-specific protein homolog) (Latex allergen Hev b 13) - Hevea brasiliensis (Para rubber tree)moderately similar to ( 341) loc\_os01g22640 12001.m08743 protein alpha-L-fucosidase 2 precursor, putative, expressed seq=cds; coord=6:125457786..125459555:1; parent\_gene=GRMZM2G150187'

'moderately similar to ( 251) AT1G09390 | Symbols: | GDSL-motif lipase/hydrolase family protein | chr1:3031264-3033415 FORWARDweakly similar to ( 167) EST\_HEVBR Esterase precursor (EC 3.1.1.-) (Early nodule-specific protein homolog) (Latex allergen Hev b 13) - Hevea brasiliensis (Para rubber tree)moderately similar to ( 341) loc\_os01g22640 12001.m08743 protein alpha-L-fucosidase 2 precursor, putative, expressed seq=cds; coord=6:125457786..125459555:1; parent\_gene=GRMZM2G150187'

'weakly similar to ( 185) loc\_os05g45460 12005.m08671 protein pistil-specific extensin-like protein precursor, putative, expressed seq=cds; coord=6:159464252..159465528:-1; parent\_gene=GRMZM2G040517'

'weakly similar to ( 110) loc\_os07g18990 12007.m06338 protein PVR3-like protein, putative, expressed seq=cds; coord=7:31086409..31087079:1; parent\_gene=GRMZM2G000221'

'weakly similar to ( 119) AT5G63530 | Symbols: ATPF3, FP3 | ATPF3; metal ion binding / transition metal ion binding | chr5:25433423-25435614 FORWARDweakly similar to ( 198) loc\_os07g20340 12007.m29133 protein ATPF3, putative, expressed seq=cds; coord=7:33007300..33009101:-1; parent\_gene=GRMZM2G042692'

'weakly similar to ( 139) AT4G10200 | Symbols: | hAT dimerisation domain-containing protein / transposase-related | chr4:6353172-6355591 FORWARDmoderately similar to ( 288) loc\_os02g14150 12002.m06661 protein transposon protein, putative, Ac/Ds sub-class seq=cds; coord=7:33279781..33282007:-1; parent\_gene=GRMZM2G364697'

'very weakly similar to (99.0) AT5G41010 | Symbols: NRPB12, NRPD12, NRPE12 | NRPB12; DNA binding / DNA-directed RNA polymerase | chr5:16424050-16424921 FORWARDweakly similar to ( 115) loc\_os01g34614 12001.m150942 protein DNA-directed RNA polymerases I, II, and III 7.3 kDa polypeptide, putative, expressed seq=cds; coord=7:40571562..40582802:-1; parent\_gene=GRMZM2G146331'

'nearly identical (1088) AT5G56030 | Symbols: HSP81-2, ERD8, HSP90.2 | HSP81-2 (HEAT SHOCK PROTEIN 81-2); ATP binding | chr5:22686923-22689433 FORWARDnearly identical (1142) HSP81\_ORYSA Heat shock protein 81-1 (HSP81-1) (Heat shock protein 82) - Oryza sativa (Rice)nearly identical (1142) loc\_os08g39140 12008.m080203 protein heat shock protein 81-1, putative, expressed seq=cds; coord=7:131783728..131787563:1; parent\_gene=GRMZM2G069651'

'highly similar to ( 567) AT5G15550 | Symbols: | transducin family protein / WD-40 repeat family protein | chr5:5059315-5062003 REVERSEhighly similar to ( 751) loc\_os07g40930 12007.m08333 protein WD-repeat protein 12, putative, expressed seq=cds; coord=7:163610898..163623823:-1; parent\_gene=GRMZM2G050501'

'highly similar to ( 668) AT3G18080 | Symbols: BGLU44 | BGLU44 (B-S GLUCOSIDASE 44); (R)-amygdalin beta-glucosidase/ 4-methylumbelliferyl-beta-D-glucopyranoside beta-glucosidase/ beta-gentiobiose beta-glucosidase/ cellobiose glucosidase/ esculin beta-glucosidase/ hydrolase, hydrolyzing O-glycosyl compounds | chr3:6191586-6194124 FORWARDmoderately similar to ( 350) BGLC\_MAIZE Beta-glucosidase, chloroplast precursor (EC 3.2.1.21) (Gentiobiase) (Cellobiase) (Beta-D-glucoside glucohydrolase) - Zea mays (Maize)highly similar to ( 773) loc\_os01g32364 12001.m09560 protein non-cyanogenic beta-glucosidase precursor, putative, expressed seq=cds; coord=8:8302750..8305316:-1; parent\_gene=AC234160.1\_FG003'

'highly similar to ( 550) AT3G51160 | Symbols: MUR1, MUR\_1, GMD2 | MUR1 (MURUS 1); GDP-mannose 4,6-dehydratase | chr3:19007232-19008353 REVERSEhighly similar to ( 639) loc\_os06g04620 12006.m05192 protein GDP-mannose 4,6 dehydratase 2, putative, expressed seq=cds; coord=9:21726160..21727733:1; parent\_gene=GRMZM2G115124'

'very weakly similar to (99.8) AT1G62290 | Symbols: | aspartyl protease family protein | chr1:23010107-23012681 REVERSEweakly similar to ( 141) ASPRX\_ORYSA Aspartic proteinase precursor (EC 3.4.23.-) - Oryza sativa (Rice)weakly similar to ( 141) loc\_os05g04630 12005.m27692 protein retrotransposon protein, putative, SINE subclass, expressed seq=cds; coord=9:21803822..21808911:1; parent\_gene=GRMZM2G144440'

'moderately similar to ( 237) AT2G46770 | Symbols: NST1, EMB2301, ANAC043 | EMB2301 (EMBRYO DEFECTIVE 2301); transcription activator/ transcription factor | chr2:19220917-19222822 REVERSEmoderately similar to ( 213) NAC76\_ORYSA NAC domain-containing protein 76 (ONAC076) - Oryza sativa (Rice)moderately similar to ( 300) loc\_os06g04090 12006.m05140 protein NAM protein, putative, expressed seq=cds; coord=9:23279027..23283429;-1; parent\_gene=GRMZM2G171395'

'weakly similar to ( 174) AT2G35540 | Symbols: | DNAJ heat shock N-terminal domain-containing protein | chr2:14927158-14928930 FORWARDmoderately similar to ( 415) loc\_os06g02170 12006.m091578 protein heat shock protein binding protein, putative, expressed seq=cds; coord=9:26548872..26550670:1; parent\_gene=GRMZM2G152373'

'weakly similar to ( 160) AT1G25682 | Symbols: | cell cycle control protein-related | chr1:9002532-9004550 REVERSEweakly similar to ( 184) loc\_os02g21880 12002.m33662 protein coiled-coil domain-containing protein 94, putative, expressed seq=cds; coord=10:144130489..144133047:1; parent\_gene=GRMZM2G366270'

'weakly similar to ( 147) AT1G02065 | Symbols: SPL8 | SPL8 (SQUAMOSA PROMOTER BINDING PROTEIN-LIKE 8); DNA binding | chr1:365625-367149 FORWARDhighly similar to ( 503) LG1\_MAIZE LIGULELESS1 protein - Zea mays (Maize)moderately similar to ( 463) loc\_os04g56170 12004.m10508 protein LIGULELESS1 protein, putative, expressed seq=cds; coord=10:146291533..146295099;-1; parent\_gene=GRMZM2G058588'

'weakly similar to ( 172) AT5G22250 | Symbols: | CCR4-NOT transcription complex protein, putative | chr5:7365605-7366441 REVERSEmoderately similar to ( 209) loc\_os04g58810 12004.m10761 protein CCR4-NOT transcription complex subunit 8, putative, expressed seq=cds; coord=10:148762274..148766456:1; parent\_gene=GRMZM2G177340'

'highly similar to ( 598) AT1G80560 | Symbols: | 3-isopropylmalate dehydrogenase, chloroplast, putative | chr1:30287833-30290126 FORWARDhighly similar to ( 605) LEU3\_BRANA 3-isopropylmalate dehydrogenase, chloroplast precursor (EC 1.1.1.85) (Beta-IPM dehydrogenase) (IMDH) (3-IPM-DH) - Brassica napus (Rape)highly similar to ( 683) loc\_os03g45320 12003.m101427 protein 3-isopropylmalate dehydrogenase 2, chloroplast precursor, putative, expressed seq=cds; coord=10:148968847..148972562:1; parent\_gene=GRMZM2G104613'

'moderately similar to ( 297) AT1G76920 | Symbols: | F-box family protein (FBX3) | chr1:28892295-28893419 FORWARDweakly similar to ( 104) loc\_os04g59010 12004.m10779 protein F-box domain containing protein, expressed seq=cds; coord=10:148984717..148986879;-1; parent\_gene=GRMZM2G104882'

'moderately similar to ( 297) AT1G76920 | Symbols: | F-box family protein (FBX3) | chr1:28892295-28893419 FORWARDweakly similar to ( 104) loc\_os04g59010 12004.m10779 protein F-box domain containing protein, expressed seq=cds; coord=10:148984717..148986879;-1; parent\_gene=GRMZM2G104882'

'moderately similar to ( 421) AT2G26890 | Symbols: GRV2, KAM2 | GRV2 (GRAVITROPISM DEFECTIVE 2); binding / heat shock protein binding | chr2:11462327-11472259 REVERSEhighly similar to ( 515) loc\_os10g42439 12010.m06997 protein GRV2, putative, expressed seq=cds; coord=1:98318531..98326535:1; parent\_gene=GRMZM2G367023'

'moderately similar to ( 278) AT4G18990 | Symbols: | xyloglucan:xyloglucosyl transferase, putative / xyloglucan endotransglycosylase, putative / endo-xyloglucan transferase, putative | chr4:10401941-10404248 REVERSEweakly similar to ( 154) XTH\_WHEAT Probable xyloglucan endotransglucosylase/hydrolase precursor (EC 2.4.1.207) - Triticum aestivum (Wheat)moderately similar to ( 381) loc\_os10g42670 12010.m07020 protein xyloglucan endotransglucosylase/hydrolase protein 30 precursor, putative, expressed seq=cds; coord=1:103264053..103316049:-1; parent\_gene=GRMZM2G070271'

'moderately similar to ( 408) AT4G15130 | Symbols: ATCCT2, CCT2 | catalytic/ choline-phosphate cytidyltransferase/ nucleotidyltransferase | chr4:8637793-8639388 FORWARDhighly similar to ( 501) loc\_os10g42790 12010.m07031 protein choline-phosphate cytidyltransferase B, putative, expressed seq=cds; coord=1:105671918..105675900:-1; parent\_gene=GRMZM2G132898'

'highly similar to ( 679) AT2G17980 | Symbols: ATSLY1 | ATSLY1; protein transporter | chr2:7824352-7826404 FORWARDhighly similar to ( 914) SLY1\_ORYSA SEC1-family transport protein SLY1 - Oryza sativa (Rice)highly similar to ( 914) loc\_os03g42320 12003.m09290 protein SEC1-family transport protein SLY1, putative, expressed seq=cds; coord=1:139596369..139599277:1; parent\_gene=GRMZM2G014872'

'moderately similar to ( 260) AT3G13224 | Symbols: | RNA recognition motif (RRM)-containing protein | chr3:4254848-4256621 FORWARDmoderately similar to ( 382) loc\_os08g23120 12008.m06333 protein heterogeneous nuclear ribonucleoprotein A3, putative, expressed seq=cds; coord=1:143622295..143626633:1; parent\_gene=GRMZM2G152526'

'highly similar to ( 721) AT2G31400 | Symbols: | pentatricopeptide (PPR) repeat-containing protein | chr2:13387201-13390550 REVERSEweakly similar to ( 180) RF1\_ORYSA Rf1 protein, mitochondrial precursor (PPR protein) (Fertility restorer) (Restorer for CMS) - Oryza sativa (Rice)highly similar to ( 758) loc\_os12g37550 12012.m07539 protein expressed protein seq=cds; coord=1:147892201..147896066:1; parent\_gene=GRMZM2G432850'

'moderately similar to ( 460) AT3G53580 | Symbols: | diaminopimelate epimerase family protein | chr3:19864784-19866907 FORWARDhighly similar to ( 547) loc\_os12g37960 12012.m26936 protein diaminopimelate epimerase, putative, expressed seq=cds; coord=1:150669643..150682734:1; parent\_gene=GRMZM2G130332'

'highly similar to ( 645) AT4G33300 | Symbols: ADR1-L1 | ADR1-L1 (ADR1-like 1); ATP binding / protein binding | chr4:16051162-16054005 REVERSEnearly identical (1217) loc\_os12g39620 12012.m073872 protein disease resistance protein, putative, expressed seq=cds; coord=1:164086816..164092155:1; parent\_gene=GRMZM2G443525'

'very weakly similar to (95.5) AT4G09040 | Symbols: | RNA recognition motif (RRM)-containing protein | chr4:5795075-5797193 REVERSEweakly similar to ( 145) loc\_os08g37700 12008.m080189 protein ribonucleoprotein, chloroplast precursor, putative, expressed seq=cds; coord=1:182100190..182102107:-1; parent\_gene=GRMZM2G023591'

'very weakly similar to ( 100) AT5G54490 | Symbols: PBPI | PBPI (PINOID-BINDING PROTEIN 1); calcium ion binding / protein binding | chr5:22121458-22121841 FORWARDweakly similar to ( 142) loc\_os01g57470 12001.m11898 protein caltractin, putative, expressed seq=cds; coord=1:187344907..187345239:-1; parent\_gene=AC213857.4\_FG003'

'moderately similar to ( 281) AT2G37640 | Symbols: ATEXPA3, ATEXP3, ATHEXP ALPHA 1.9, EXP3 | EXP3 | chr2:15788077-15789812 REVERSEmoderately similar to ( 399) EXP32\_ORYSA Expansin-A32 precursor (OsEXPA32) (Alpha-expansin-32) (OsEXP32) (OsaEXPa1.30) - Oryza sativa (Rice)moderately similar to ( 399) loc\_os08g44790 12008.m08451 protein alpha-expansin 3 precursor, putative, expressed seq=cds; coord=1:203566426..203567543:1; parent\_gene=GRMZM2G106899'

'weakly similar to ( 104) loc\_os08g44190 12008.m08392 protein zinc finger protein 2, putative, expressed seq=cds; coord=1:205832080..205832623:1; parent\_gene=GRMZM2G104516'

'nearly identical (1060) AT3G09920 | Symbols: PIP5K9 | PIP5K9 (PHOSPHATIDYL INOSITOL MONOPHOSPHATE 5 KINASE); 1-phosphatidylinositol-4-phosphate 5-kinase/ ATP binding / phosphatidylinositol phosphate kinase | chr3:3040426-3043676 REVERSEhighly similar to ( 723) PI5K1\_ORYSA Phosphatidylinositol-4-phosphate 5-kinase 1 precursor (EC 2.7.1.68) (1-phosphatidylinositol-4-phosphate kinase) (PIP5K) (PtdIns(4)P-5-kinase) (Diphosphoinositide kinase) - Oryza sativa (Rice)nearly identical (1472) loc\_os02g57660 12002.m10787 protein phosphatidylinositol-4-phosphate 5-kinase 9, putative, expressed seq=cds; coord=1:226316745..226321116:-1; parent\_gene=GRMZM2G374973'

'moderately similar to ( 213) AT5G23290 | Symbols: PDF5 | PDF5 (PREFOLDIN 5); unfolded protein binding | chr5:7846144-7847428 FORWARDmoderately similar to ( 258) loc\_os10g34670 12010.m22005 protein prefoldin subunit 5, putative, expressed seq=cds; coord=1:229567215..229571434:1; parent\_gene=GRMZM2G014676'

'moderately similar to ( 442) AT1G05470 | Symbols: CVP2 | CVP2 (COTYLEDON VASCULAR PATTERN 2); hydrolase/ inositol trisphosphate phosphatase | chr1:1608558-1611291 REVERSEhighly similar to ( 717) loc\_os03g57950 12003.m35640 protein inositol-1, 4, 5-trisphosphate 5-Phosphatase-like protein, putative seq=cds; coord=1:286983366..286991541:1; parent\_gene=GRMZM2G371210'

'highly similar to ( 797) AT5G13520 | Symbols: | peptidase M1 family protein | chr5:4342117-4344571 REVERSEnearly identical (1127) loc\_os03g60460 12003.m10935 protein leukotriene A-4 hydrolase, putative, expressed seq=cds; coord=1:292988864..292997657:1; parent\_gene=GRMZM2G155580'

'moderately similar to ( 319) AT4G01950 | Symbols: ATGPAT3, GPAT3 | GPAT3 (GLYCEROL-3-PHOSPHATE ACYLTRANSFERASE 3); acyltransferase | chr4:844597-846710 REVERSEmoderately similar to ( 457) loc\_os03g61720 12003.m11052 protein glycerol-3-phosphate acyltransferase 1, putative, expressed seq=cds; coord=1:295442987..295445179:-1; parent\_gene=GRMZM2G156729'

'highly similar to ( 654) AT4G02510 | Symbols: TOC159, TOC86, PPI2, TOC160, ATTOC159 | TOC159 (TRANSLOCON AT THE OUTER ENVELOPE MEMBRANE OF CHLOROPLASTS 159); transmembrane receptor chr4:1104766-1109360 FORWARDweakly similar to ( 115) TOC34\_PEA Translocase of chloroplast 34 (EC 3.6.5.-) (34 kDa chloroplast outer envelope protein) (GTP-binding protein OEP34) (GTP-binding protein IAP34) - Pisum sativum (Garden pea)nearly identical (1167) loc\_os03g61890 12003.m35506 protein chloroplast protein import component Toc159, putative, expressed seq=cds; coord=1:295982419..295987143:1; parent\_gene=GRMZM2G448523'

'moderately similar to ( 207) AT1G33330 | Symbols: | peptide chain release factor, putative | chr1:12084968-12086238 FORWARDmoderately similar to ( 270) loc\_os01g66379 12001.m12745 protein expressed protein seq=cds; coord=1:297169418..297180338:1; parent\_gene=GRMZM2G304638'

'weakly similar to ( 136) AT2G14680 | Symbols: MEE13 | myosin heavy chain-related | chr2:6278256-6283766 FORWARDmoderately similar to ( 347) loc\_os03g31730 12003.m08422 protein expressed protein seq=cds; coord=1:301252426..301259088:1; parent\_gene=GRMZM2G160578'

'highly similar to ( 832) AT4G30560 | Symbols: ATCNGC9, CNGC9 | ATCNGC9 (CYCLIC NUCLEOTIDE GATED CHANNEL 9); calmodulin binding / cyclic nucleotide binding / ion channel | chr4:14926974-14929681 REVERSEnearly identical (1168) loc\_os04g55080 12004.m10400 protein cyclic nucleotide-gated ion channel 9, putative, expressed seq=cds; coord=2:6019299..6030234:-1; parent\_gene=GRMZM2G023037'

'weakly similar to ( 112) loc\_os04g54900 12004.m10382 protein DNA binding protein, putative seq=cds; coord=2:6190524..6191628:1; parent\_gene=GRMZM2G072820'

'highly similar to ( 669) AT3G01930 | Symbols: | nodulin family protein | chr3:319289-321488 REVERSEhighly similar to ( 747) loc\_os04g31924 12004.m78931 protein nodulin-like protein, putative, expressed seq=cds; coord=2:69910297..69914524:-1; parent\_gene=GRMZM2G179106'

'weakly similar to ( 121) loc\_os05g14370 12005.m05848 protein WRKY transcription factor 70, putative, expressed seq=cds; coord=2:151685379..151686596:1; parent\_gene=GRMZM2G400559'

'moderately similar to ( 288) AT1G79630 | Symbols: | protein phosphatase 2C family protein / PP2C family protein | chr1:29962931-29964920 REVERSEhighly similar to ( 555) loc\_os11g01790 12011.m04380 protein catalytic/ protein phosphatase type 2C, putative, expressed seq=cds; coord=2:152500883..152503674:-1; parent\_gene=GRMZM2G153675'

'weakly similar to ( 114) AT1G08170 | Symbols: | histone H2B family protein | chr1:2562941-2563672 REVERSEweakly similar to ( 105) H2B\_GOSHI Histone H2B - Gossypium hirsutum (Upland cotton)weakly similar to ( 132) loc\_os09g39730 12009.m06910 protein histone H2B, putative, expressed seq=cds; coord=2:164859248..164860288:1; parent\_gene=GRMZM2G442555'

'moderately similar to ( 356) AT3G22250 | Symbols: | UDP-glucuronosyl/UDP-glucosyl transferase family protein | chr3:7867806-7870053 FORWARDweakly similar to ( 156) IAAG\_MAIZE Indole-3-acetate beta-glucosyltransferase (EC 2.4.1.121) (IAA-Glu synthetase) ((Uridine 5'-diphosphate-glucose:indol-3-ylacetyl)-beta-D-glucosyl transferase) - Zea mays (Maize)moderately similar to ( 492) loc\_os02g42280 12002.m09263 protein UDP-glycosyltransferase/ transferase, transferring glycosyl groups, putative, expressed seq=cds; coord=2:175627952..175629743:1; parent\_gene=GRMZM2G110816'

'highly similar to ( 721) AT5G47750 | Symbols: D6PKL2, PK5 | D6PKL2 (D6 PROTEIN KINASE LIKE 2); kinase | chr5:19339947-19341864 REVERSEhighly similar to ( 711) G11A\_ORYSA Protein kinase G11A (EC 2.7.11.1) - Oryza sativa (Rice)highly similar to ( 900) loc\_os09g30150 12009.m060006 protein protein kinase G11A, putative, expressed seq=cds; coord=2:188871530..188875337:1; parent\_gene=GRMZM2G026065'

'weakly similar to ( 130) AT1G56170 | Symbols: HAP5B, ATHAP5B, NF-YC2 | NF-YC2 (NUCLEAR FACTOR Y, SUBUNIT C2); DNA binding / transcription activator/ transcription factor | chr1:21025118-21025717 FORWARDweakly similar to ( 141) loc\_os09g30310 12009.m06182 protein nuclear transcription factor Y subunit C-2, putative, expressed seq=cds; coord=2:189204687..189208176:-1; parent\_gene=GRMZM2G022162'

'nearly identical (1097) AT5G56030 | Symbols: HSP81-2, ERD8, HSP90.2 | HSP81-2 (HEAT SHOCK PROTEIN 81-2); ATP binding | chr5:22686923-22689433 FORWARDnearly identical (1135) HSP81\_ORYSA Heat shock protein 81-1 (HSP81-1) (Heat shock protein 82) - Oryza sativa (Rice)nearly identical (1135) loc\_os08g39140 12008.m080203 protein heat shock protein 81-1, putative, expressed seq=cds; coord=2:189443283..189447454:1; parent\_gene=GRMZM2G112165'

'weakly similar to ( 101) AT2G16030 | Symbols: | methyltransferase | chr2:6974196-6974891 REVERSEweakly similar to ( 181) loc\_os05g42140 12005.m08387 protein expressed protein seq=cds; coord=2:194045699..194046572:1; parent\_gene=GRMZM2G530263'

'moderately similar to ( 363) AT2G21300 | Symbols: | kinesin motor family protein | chr2:9114396-9118292 REVERSEweakly similar to ( 122) FLA10\_CHLRE Kinesin-like protein FLA10 (Protein KHP1) - Chlamydomonas reinhardtiihighly similar to ( 728) loc\_os09g35890 12009.m060046 protein ATP binding protein, putative, expressed seq=cds; coord=2:195109765..195114177:-1; parent\_gene=GRMZM2G015395'

'weakly similar to ( 161) AT4G37260 | Symbols: MYB73, ATMYB73 | MYB73 (MYB DOMAIN PROTEIN 73); DNA binding / transcription factor | chr4:17540602-17541564 FORWARDweakly similar to ( 102) MYBA2\_ORYSA Myb-related protein MYBAS2 - Oryza sativa (Rice)weakly similar to ( 183) loc\_os01g74590 12001.m13484 protein myb-like DNA-binding domain containing protein, expressed seq=cds; coord=3:143487289..143488936:1; parent\_gene=GRMZM2G369799'

'nearly identical (1073) AT5G19420 | Symbols: | Ran GTPase binding / chromatin binding / zinc ion binding | chr5:6547945-6552866 REVERSEnearly identical (1410) loc\_os01g72320 12001.m13267 protein ran GTPase binding protein, putative, expressed seq=cds; coord=3:148394779..148401859:-1; parent\_gene=GRMZM2G125642'

'moderately similar to ( 377) AT1G50420 | Symbols: SCL3, SCL-3 | SCL3; transcription factor | chr1:18678177-18679625 REVERSEweakly similar to ( 185) CIGR1\_ORYSA Chitin-inducible gibberellin-responsive protein 1 - Oryza sativa (Rice)highly similar to ( 655) loc\_os01g71970 12001.m13235 protein GRAS family transcription factor containing protein, expressed seq=cds; coord=3:150830511..150832666:-1; parent\_gene=GRMZM2G082387'

'highly similar to ( 747) AT2G41540 | Symbols: GPDHC1 | GPDHC1; NAD or NADH binding / glycerol-3-phosphate dehydrogenase (NAD+) | chr2:17326801-17328654 FORWARDhighly similar to ( 831) loc\_os01g71280 12001.m13171 protein glycerol-3-phosphate dehydrogenase, putative, expressed seq=cds; coord=3:152493619..152499065:-1; parent\_gene=GRMZM2G155348'

'highly similar to ( 749) AT1G15500 | Symbols: ATNTT2 | ATNTT2; ATP:ADP antiporter | chr1:5326426-5328688 FORWARDhighly similar to ( 753) TLC1\_SOLTU Plastidic ATP/ADP-transporter - Solanum tuberosum (Potato)highly similar to ( 887) loc\_os01g45910 12001.m10791 protein plastidic ATP/ADP-transporter, putative, expressed seq=cds; coord=3:214471264..214476975:1; parent\_gene=GRMZM2G064473'

'highly similar to ( 707) AT4G01210 | Symbols: | transferase, transferring glycosyl groups | chr4:507738-512362 REVERSEhighly similar to ( 979) loc\_os01g43380 12001.m10601 protein transferase, transferring glycosyl groups, putative, expressed seq=cds; coord=3:217820434..217831211:1; parent\_gene=GRMZM2G053047'

'moderately similar to ( 486) AT1G33420 | Symbols: | PHD finger family protein | chr1:12121063-12123346 REVERSEhighly similar to ( 857) loc\_os11g12650 12011.m05457 protein PHD-finger family protein, expressed seq=cds; coord=4:10228455..10233101:-1; parent\_gene=GRMZM2G068331'

'moderately similar to ( 486) AT1G33420 | Symbols: | PHD finger family protein | chr1:12121063-12123346 REVERSEhighly similar to ( 857) loc\_os11g12650 12011.m05457 protein PHD-finger family protein, expressed seq=cds; coord=4:10228455..10233101:-1; parent\_gene=GRMZM2G068331'

'moderately similar to ( 204) AT2G02180 | Symbols: TOM3 | TOM3; protein binding | chr2:560976-562961 FORWARDmoderately similar to ( 229) loc\_os10g39220 12010.m06692 protein tobamovirus multiplication 3, putative, expressed seq=cds; coord=4:10659805..10663175:1; parent\_gene=GRMZM2G426306'

'moderately similar to ( 317) AT3G61060 | Symbols: AtPP2-A13 | AtPP2-A13 (Arabidopsis thaliana phloem protein 2-A13); carbohydrate binding | chr3:22603166-22604336 FORWARDmoderately similar to ( 469) loc\_os02g45320 12002.m09569 protein ATPP2-A13, putative, expressed seq=cds; coord=4:155377261..155382600:1; parent\_gene=GRMZM2G137029'

'moderately similar to ( 493) AT5G16880 | Symbols: | VHS domain-containing protein / GAT domain-containing protein | chr5:5549658-5551274 FORWARDhighly similar to ( 645) loc\_os02g46962 12002.m100323 protein protein transporter, putative, expressed seq=cds; coord=4:158139356..158143482:1; parent\_gene=GRMZM2G054354'

'moderately similar to ( 467) AT3G01580 | Symbols: | pentatricopeptide (PPR) repeat-containing protein | chr3:223529-225454 REVERSEvery weakly similar to (83.6) RF1\_ORYSA Rf1 protein, mitochondrial precursor (PPR protein) (Fertility restorer) (Restorer for CMS) - Oryza sativa (Rice)moderately similar to ( 358) loc\_os03g27880 12003.m08112 protein EMB2758, putative seq=cds; coord=4:160263671..160269260:1; parent\_gene=GRMZM2G110483'

'very weakly similar to ( 100) AT1G79230 | Symbols: ST1, ATMST1, MST1, ATRDH1 | MST1 (MERCAPTOPYRUVATE SULFURTRANSFERASE 1); 3-mercaptopyruvate sulfurtransferase/ sulfurtransferase/ thiosulfate sulfurtransferase | chr1:29801358-29803679 FORWARDweakly similar to ( 105) loc\_os02g07044 12002.m100460 protein thiosulfate transferase, putative, expressed seq=cds; coord=4:236385493..236388871:-1; parent\_gene=GRMZM2G168888'

'highly similar to ( 735) AT4G05320 | Symbols: UBQ10 | UBQ10 (POLYUBIQUITIN 10); protein binding | chr4:2718559-2719932 FORWARDweakly similar to ( 150) UBIQ\_WHEAT Ubiquitin - Triticum aestivum (Wheat)highly similar to ( 734) loc\_os06g46770 12006.m091761 protein polyubiquitin containing 7 ubiquitin monomers, putative, expressed seq=cds; coord=4:236857988..236860949:1; parent\_gene=GRMZM2G118637'

'weakly similar to ( 194) AT5G09920 | Symbols: RPB15.9, ATRPB15.9, RPB15.9.9, NRPB4 | NRPB4; DNA-directed RNA polymerase | chr5:3096276-3097370 FORWARDmoderately similar to ( 239) loc\_os02g02510 12002.m33507 protein DNA-directed RNA polymerase II 16 kDa polypeptide, putative, expressed seq=cds; coord=4:239931798..239932992:1; parent\_gene=GRMZM2G119393'



'highly similar to ( 724) AT1G05180 | Symbols: AXR1 | AXR1 (AUXIN RESISTANT 1); small protein activating enzyme | chr1:1498524-1501469 REVERSEhighly similar to ( 917) loc\_os03g60550 12003.m35481 protein NEDD8-activating enzyme E1 regulatory subunit, putative, expressed seq=cds; coord=5:2386974..2400647:-1; parent\_gene=GRMZM2G002765'

'very weakly similar to (83.6) AT1G27730 | Symbols: STZ, ZAT10 | STZ (salt tolerance zinc finger); nucleic acid binding / transcription factor/ transcription repressor/ zinc ion binding | chr1:9648302-9648985 REVERSEweakly similar to ( 145) ZFP1\_WHEAT Zinc-finger protein 1 (WZF1) - Triticum aestivum (Wheat)weakly similar to ( 143) loc\_os03g55540 12003.m10467 protein zinc-finger protein 1, putative, expressed seq=cds; coord=5:6315211..6316774:1; parent\_gene=GRMZM2G035103'

'moderately similar to ( 391) AT1G05140 | Symbols: | membrane-associated zinc metalloprotease, putative | chr1:1482681-1484006 FORWARDhighly similar to ( 567) loc\_os03g38230 12003.m08922 protein expressed protein seq=cds; coord=5:20133606..20135308:1; parent\_gene=GRMZM2G062470'

'moderately similar to ( 448) AT1G02050 | Symbols: | chalcone and stilbene synthase family protein | chr1:359164-360441 REVERSEmoderately similar to ( 261) THS1\_VITVI Stilbene synthase 1 (EC 2.3.1.95) (Resveratrol synthase 1) (Trihydroxystilbene synthase 1) (PSV25) - Vitis vinifera (Grape)highly similar to ( 619) loc\_os10g34360 12010.m06262 protein chalcone synthase G, putative, expressed seq=cds; coord=5:26971466..26975726:1; parent\_gene=GRMZM2G477683'

'highly similar to ( 643) AT4G33210 | Symbols: | F-box family protein (FBL15) | chr4:16015971-16020697 REVERSEhighly similar to ( 995) loc\_os10g25680 12010.m05512 protein ubiquitin-protein ligase, putative, expressed seq=cds; coord=5:36058740..36071056:-1; parent\_gene=GRMZM2G040182'

'weakly similar to ( 102) AT1G13920 | Symbols: | remorin family protein | chr1:4758188-4759754 FORWARDweakly similar to ( 196) loc\_os10g17790 12010.m04863 protein remorin, C-terminal region family protein, expressed seq=cds; coord=5:46526520..46528270:-1; parent\_gene=GRMZM2G148790'

'weakly similar to ( 172) AT1G68460 | Symbols: ATIPT1 | ATIPT1 (isopentenyltransferase 1); adenylate dimethylallyltransferase | chr1:25668976-25670049 REVERSEmoderately similar to ( 319) loc\_os05g47840 12005.m08856 protein ATIPT1, putative, expressed seq=cds; coord=6:162742963..162744881:-1; parent\_gene=GRMZM2G025429'

'weakly similar to ( 172) AT1G69310 | Symbols: WRKY57, ATWRKY57 | WRKY57; transcription factor | chr1:26056118-26057909 REVERSEweakly similar to ( 178) loc\_os07g02060 12007.m04680 protein OsWRKY29 - Superfamily of rice TFs having WRKY and zinc finger domains, expressed seq=cds; coord=7:1920108..1921464:1; parent\_gene=GRMZM2G018721'

'weakly similar to ( 144) AT1G69120 | Symbols: AP1, AGL7 | AP1 (APETALA1); DNA binding / protein binding / protein heterodimerization/ transcription activator/ transcription factor | chr1:25982576-25986102 REVERSEweakly similar to ( 169) MAD15\_ORYSA MADS-box transcription factor 15 (OsMADS15) (Protein APETALA1-like A) (FDRMADS3) (RMADS215) - Oryza sativa (Rice)weakly similar to ( 171) loc\_os07g01820 12007.m66706 protein MADS-box transcription factor 15, putative, expressed seq=cds; coord=7:2062067..2065923:1; parent\_gene=GRMZM2G072582'

'moderately similar to ( 432) AT1G30540 | Symbols: | ATPase, BadF/BadG/BcrA/BcrD-type family | chr1:10816951-10819172 REVERSEhighly similar to ( 644) loc\_os07g05380 12007.m05002 protein ATPase, putative, expressed seq=cds; coord=7:5069050..5071431:1; parent\_gene=GRMZM2G093705'

'highly similar to ( 528) AT3G14420 | Symbols: | (S)-2-hydroxy-acid oxidase, peroxisomal, putative / glycolate oxidase, putative / short chain alpha-hydroxy acid oxidase, putative | chr3:4821899-4823899 FORWARDhighly similar to ( 524) GOX\_SPIOL Peroxisomal (S)-2-hydroxy-acid oxidase (EC 1.1.3.15) (Glycolate oxidase) (GOX) (Short chain alpha-hydroxy acid oxidase) - Spinacia oleracea (Spinach)highly similar to ( 556) loc\_os07g05820 12007.m29070 protein hydroxyacid oxidase 1, putative, expressed seq=cds; coord=7:5523491..5527292:1; parent\_gene=GRMZM2G129246'

'moderately similar to ( 204) AT5G16010 | Symbols: | 3-oxo-5-alpha-steroid 4-dehydrogenase family protein / steroid 5-alpha-reductase family protein | chr5:5227982-5229012 FORWARDmoderately similar to ( 287) loc\_os07g06800 12007.m05140 protein 3-oxo-5-alpha-steroid 4-dehydrogenase 2, putative, expressed seq=cds; coord=7:6854861..6856103:-1; parent\_gene=GRMZM2G394968'

'moderately similar to ( 280) AT4G14770 | Symbols: TCX2, ATTCX2 | TCX2 (TESMIN/TSO1-LIKE CXC 2); transcription factor | chr4:8481522-8484825 REVERSEhighly similar to ( 861) loc\_os07g07974 12007.m05257 protein TSO1, putative, expressed seq=cds; coord=7:9327103..9332339:1; parent\_gene=GRMZM2G153754'

'moderately similar to ( 377) AT2G36870 | Symbols: | xyloglucan:xyloglucosyl transferase, putative / xyloglucan endotransglycosylase, putative / endo-xyloglucan transferase, putative | chr2:15472869-15474630 REVERSEmoderately similar to ( 218) XTH\_TOBAC Probable xyloglucan endotransglucosylase/hydrolase protein precursor (EC 2.4.1.207) - Nicotiana tabacum (Common tobacco)highly similar to ( 537) loc\_os07g29750 12007.m07246 protein xyloglucan endotransglucosylase/hydrolase protein 32 precursor, putative, expressed seq=cds; coord=7:148463792..148465550:1; parent\_gene=GRMZM2G413044'

'moderately similar to ( 329) AT4G05090 | Symbols: | inositol monophosphatase family protein | chr4:2609244-2611627 FORWARDweakly similar to ( 108) DPNP\_ORYSA 3'(2'),5'-bisphosphate nucleotidase (EC 3.1.3.7) (3'(2'),5'-bisphosphonucleoside 3'(2')-phosphohydrolase) (DPNPase) - Oryza sativa (Rice)moderately similar to ( 486) loc\_os07g37220 12007.m07972 protein PAP-specific phosphatase, mitochondrial precursor, putative, expressed seq=cds; coord=7:157202404..157207982:-1; parent\_gene=GRMZM2G036007'  
'very weakly similar to (97.4) loc\_os03g38230 12003.m08922 protein expressed protein seq=cds; coord=7:158131754..158133567:-1; parent\_gene=AC213455.3\_FG008'

'highly similar to ( 788) AT2G14960 | Symbols: GH3.1 | GH3.1 | chr2:6451659-6453670 REVERSEhighly similar to ( 930) GH38\_ORYSA Probable indole-3-acetic acid-amido synthetase GH3.8 (EC 6.3.2.-) (Auxin-responsive GH3-like protein 8) (OsGH3-8) - Oryza sativa (Rice)highly similar to ( 930) loc\_os07g40290 12007.m08271 protein indole-3-acetic acid-amido synthetase GH3.8, putative, expressed seq=cds; coord=7:162669667..162672138:-1; parent\_gene=GRMZM2G053338'

'weakly similar to ( 193) AT1G06260 | Symbols: | cysteine proteinase, putative | chr1:1916449-1917585  
FORWARDweakly similar to ( 184) ORYA\_ORYSA Oryzain alpha chain precursor (EC 3.4.22.-) - Oryza sativa  
(Rice)moderately similar to ( 260) loc\_os09g21370 12009.m05344 protein cysteine proteinase EP-B 1 precursor,  
putative, expressed seq=cds; coord=7:162858798..162860272:-1; parent\_gene=GRMZM2G049882'

'moderately similar to ( 271) AT3G04500 | Symbols: | RNA recognition motif (RRM)-containing protein |  
chr3:1212065-1213795 REVERSEmoderately similar to ( 320) loc\_os08g45240 12008.m62038 protein expressed  
protein seq=cds; coord=7:163512342..163516768:1; parent\_gene=GRMZM2G068255'

'nearly identical (1145) AT5G28740 | Symbols: | transcription-coupled DNA repair protein-related | chr5:10780774-  
10783772 FORWARDnearly identical (1513) loc\_os07g44970 12007.m08717 protein XPA-binding protein 2,  
putative, expressed seq=cds; coord=7:170033313..170038657:-1; parent\_gene=GRMZM2G356894'

'highly similar to ( 622) AT3G56310 | Symbols: | alpha-galactosidase, putative / melibiase, putative / alpha-D-  
galactoside galactohydrolase, putative | chr3:20882886-20885745 FORWARDmoderately similar to ( 474)  
AGAL\_ORYSA Alpha-galactosidase precursor (EC 3.2.1.22) (Melibiase) (Alpha-D-galactoside galactohydrolase) -  
Oryza sativa (Rice)highly similar to ( 746) loc\_os07g48160 12007.m09030 protein alpha-galactosidase precursor,  
putative, expressed seq=cds; coord=7:172979297..172984001:1; parent\_gene=GRMZM2G053554'

'highly similar to ( 622) AT3G56310 | Symbols: | alpha-galactosidase, putative / melibiase, putative / alpha-D-  
galactoside galactohydrolase, putative | chr3:20882886-20885745 FORWARDmoderately similar to ( 474)  
AGAL\_ORYSA Alpha-galactosidase precursor (EC 3.2.1.22) (Melibiase) (Alpha-D-galactoside galactohydrolase) -  
Oryza sativa (Rice)highly similar to ( 746) loc\_os07g48160 12007.m09030 protein alpha-galactosidase precursor,  
putative, expressed seq=cds; coord=7:172979297..172984001:1; parent\_gene=GRMZM2G053554'

'moderately similar to ( 274) AT1G09560 | Symbols: GLP5 | GLP5 (GERMIN-LIKE PROTEIN 5); manganese ion  
binding / nutrient reservoir | chr1:3093896-3094639 FORWARDmoderately similar to ( 264) RHRE\_PEA  
Rhicadhesin receptor precursor (Germin-like protein) - Pisum sativum (Garden pea)moderately similar to ( 336)  
loc\_os01g18170 12001.m08359 protein rhicadhesin receptor precursor, putative, expressed seq=cds;  
coord=8:1091537..1092833:-1; parent\_gene=GRMZM2G103512'

'nearly identical (1376) AT4G31480 | Symbols: | coatomer beta subunit, putative / beta-coat protein, putative / beta-  
COP, putative | chr4:15264076-15267384 FORWARDnearly identical (1633) loc\_os01g17430 12001.m08334 protein  
coatomer subunit beta, putative, expressed seq=cds; coord=8:1448424..1454503:1; parent\_gene=GRMZM2G378906'

'moderately similar to ( 447) AT2G05920 | Symbols: | subtilase family protein | chr2:2269831-2272207  
REVERSEhighly similar to ( 971) loc\_os05g36010 12005.m07831 protein subtilisin-like protease precursor, putative,  
expressed seq=cds; coord=8:101208361..101210989:1; parent\_gene=GRMZM2G055684'

'weakly similar to ( 151) AT1G17160 | Symbols: | pfkB-type carbohydrate kinase family protein | chr1:5867678-  
5869175 FORWARDweakly similar to ( 176) loc\_os01g47550 12001.m10950 protein ribokinase, putative, expressed  
seq=cds; coord=8:149044077..149045102:1; parent\_gene=GRMZM2G178346'

'weakly similar to ( 145) AT2G33880 | Symbols: WOX9, HB-3, STIP | HB-3; transcription factor | chr2:14341639-14343597 REVERSEmoderately similar to ( 292) loc\_os01g47710 12001.m10964 protein homeobox domain containing protein, expressed seq=cds; coord=8:149301222..149304982:1; parent\_gene=GRMZM2G133972'

'weakly similar to ( 145) AT2G33880 | Symbols: WOX9, HB-3, STIP | HB-3; transcription factor | chr2:14341639-14343597 REVERSEmoderately similar to ( 292) loc\_os01g47710 12001.m10964 protein homeobox domain containing protein, expressed seq=cds; coord=8:149301222..149304982:1; parent\_gene=GRMZM2G133972'

'moderately similar to ( 220) AT5G26660 | Symbols: ATMYB4, ATMYB86 | ATMYB86 (MYB DOMAIN PROTEIN 86); specific transcriptional repressor/ transcription repressor | chr5:9331775-9333044 REVERSEmoderately similar to ( 285) MYB3\_HORVU Myb-related protein Hv33 - Hordeum vulgare (Barley)moderately similar to ( 405) loc\_os01g50720 12001.m11253 protein myb-related protein Hv33, putative, expressed seq=cds; coord=8:153463293..153465006:-1; parent\_gene=GRMZM2G003406'

'weakly similar to ( 131) loc\_os01g06320 12001.m07262 protein myb-like DNA-binding domain, SHAQKYF class family protein, expressed seq=cds; coord=9:8775366..8777307:1; parent\_gene=GRMZM2G371870'

'moderately similar to ( 328) AT1G21890 | Symbols: | nodulin MtN21 family protein | chr1:7682808-7685581 REVERSEmoderately similar to ( 478) loc\_os06g10750 12006.m05792 protein nodulin protein, putative, expressed seq=cds; coord=9:8432717..8434846:-1; parent\_gene=GRMZM2G088053'

'moderately similar to ( 237) AT2G46770 | Symbols: NST1, EMB2301, ANAC043 | EMB2301 (EMBRYO DEFECTIVE 2301); transcription activator/ transcription factor | chr2:19220917-19222822 REVERSEmoderately similar to ( 213) NAC76\_ORYSA NAC domain-containing protein 76 (ONAC076) - Oryza sativa (Rice)moderately similar to ( 300) loc\_os06g04090 12006.m05140 protein NAM protein, putative, expressed seq=cds; coord=9:23279027..23283429:-1; parent\_gene=GRMZM2G171395'

'highly similar to ( 926) AT2G21480 | Symbols: | protein kinase family protein | chr2:9202753-9205368 REVERSEmoderately similar to ( 264) NORK\_PEA Nodulation receptor kinase precursor (EC 2.7.11.1) - Pisum sativum (Garden pea)nearly identical (1276) loc\_os06g03610 12006.m05093 protein protein kinase, putative, expressed seq=cds; coord=9:25086132..25089397:1; parent\_gene=GRMZM2G335052'

'moderately similar to ( 296) AT1G33140 | Symbols: PGY2 | PGY2 (PIGGYBACK2); structural constituent of ribosome | chr1:12023360-12024502 FORWARDmoderately similar to ( 345) RL9\_ORYSA 60S ribosomal protein L9 - Oryza sativa (Rice)moderately similar to ( 345) loc\_os09g31180 12009.m060014 protein 60S ribosomal protein L9, putative, expressed seq=cds; coord=9:27092199..27094638:1; parent\_gene=GRMZM2G084739'

'weakly similar to ( 131) AT2G37060 | Symbols: NF-YB8 | NF-YB8 (NUCLEAR FACTOR Y, SUBUNIT B8); transcription factor | chr2:15576336-15577660 FORWARDweakly similar to ( 160) NFYB4\_ORYSA Nuclear transcription factor Y subunit B-4 (OsNF-YB-4) (Transcriptional activator HAP3C) - Oryza sativa (Rice)weakly similar to ( 160) loc\_os05g49780 12005.m09048 protein nuclear transcription factor Y subunit B-4, putative, expressed seq=cds; coord=9:67719261..67720839:-1; parent\_gene=GRMZM2G121897'

'highly similar to ( 572) AT4G39950 | Symbols: CYP79B2 | CYP79B2; electron carrier/ heme binding / iron ion binding / monooxygenase/ oxygen binding | chr4:18525311-18527284 FORWARDhighly similar to ( 753) C79A1\_SORBI Cytochrome P450 79A1 (EC 1.14.13.41) (Tyrosine N-monooxygenase) (Cytochrome P450Tyr) - Sorghum bicolor (Sorghum) (Sorghum vulgare)highly similar to ( 543) loc\_os03g37290 12003.m08838 protein cytochrome P450 79A1, putative, expressed seq=cds; coord=9:78205868..78207890:-1; parent\_gene=GRMZM2G138248'

'moderately similar to ( 300) AT5G17000 | Symbols: | NADP-dependent oxidoreductase, putative | chr5:5584983-5586991 REVERSEhighly similar to ( 535) loc\_os06g40070 12006.m08544 protein NADP-dependent oxidoreductase P2, putative, expressed seq=cds; coord=9:88874336..88876199:-1; parent\_gene=GRMZM2G099642'

'moderately similar to ( 407) AT1G20650 | Symbols: | ATP binding / protein kinase/ protein serine/threonine kinase | chr1:7158422-7160022 REVERSEmoderately similar to ( 219) NOR\_K\_PEA Nodulation receptor kinase precursor (EC 2.7.11.1) - Pisum sativum (Garden pea)highly similar to ( 618) loc\_os03g03880 12003.m05920 protein serine/threonine-protein kinase NAK, putative, expressed seq=cds; coord=9:151572087..151576489:1; parent\_gene=GRMZM2G009869'

'moderately similar to ( 376) AT1G67440 | Symbols: emb1688 | emb1688 (embryo defective 1688); GTP binding / GTPase | chr1:25263905-25265551 REVERSEhighly similar to ( 512) loc\_os04g31270 12004.m08230 protein EMB1688, putative, expressed seq=cds; coord=10:108218986..108230288:1; parent\_gene=GRMZM2G097106'

'weakly similar to ( 118) AT2G22750 | Symbols: | basic helix-loop-helix (bHLH) family protein | chr2:9672145-9673624 FORWARDmoderately similar to ( 202) loc\_os03g46860 12003.m09702 protein DNA binding protein, putative, expressed seq=cds; coord=10:118369285..118370757:1; parent\_gene=GRMZM2G355469'

'weakly similar to ( 138) AT3G58630 | Symbols: | transcription factor | chr3:21683928-21685771 REVERSEmoderately similar to ( 338) loc\_os04g36790 12004.m08719 protein 6b-interacting protein 1, putative, expressed seq=cds; coord=10:119916059..119917843:-1; parent\_gene=GRMZM2G392168'

'moderately similar to ( 215) AT5G20320 | Symbols: DCL4, ATDCL4 | DCL4 (DICER-LIKE 4); RNA binding / protein binding / ribonuclease III | chr5:6859571-6869068 REVERSEmoderately similar to ( 419) loc\_os04g43050 12004.m78969 protein dicer-like protein 4, putative, expressed seq=cds; coord=10:129967983..129970444:-1; parent\_gene=GRMZM2G160473'

'moderately similar to ( 363) AT1G13250 | Symbols: GATL3 | GATL3 (Galacturonosyltransferase-like 3); polygalacturonate 4-alpha-galacturonosyltransferase/ transferase, transferring glycosyl groups / transferase, transferring hexosyl groups | chr1:4528965-4530002 REVERSEhighly similar to ( 516) loc\_os04g44850 12004.m09442 protein transferase, transferring glycosyl groups, putative, expressed seq=cds; coord=10:132525257..132527036:1; parent\_gene=GRMZM2G468661'

'highly similar to ( 694) AT2G16950 | Symbols: TRN1, ATTRN1 | TRN1 (TRANSPORTIN 1); protein transporter | chr2:7353939-7360637 FORWARDhighly similar to ( 880) loc\_os04g59494 12004.m35538 protein transportin-2, putative, expressed seq=cds; coord=10:149428267..149436396:1; parent\_gene=GRMZM2G312026'

'moderately similar to ( 449) AT2G05940 | Symbols: | protein kinase, putative | chr2:2287514-2289270  
REVERSEmoderately similar to ( 213) NORK\_PEA Nodulation receptor kinase precursor (EC 2.7.11.1) - Pisum  
sativum (Garden pea)highly similar to ( 564) loc\_os03g08170 12003.m06326 protein protein kinase APK1B,  
chloroplast precursor, putative, expressed seq=cds; coord=1:16468414..16473940:1; parent\_gene=GRMZM2G175164'

'highly similar to ( 714) AT2G26250 | Symbols: FDH, KCS10 | KCS10 (3-KETOACYL-COA SYNTHASE 10);  
acyltransferase/ catalytic/ transferase, transferring acyl groups other than amino-acyl groups | chr2:11170799-  
11173059 REVERSEhighly similar to ( 929) loc\_os03g08360 12003.m35563 protein fiddlehead-like protein, putative,  
expressed seq=cds; coord=1:16822675..16826498:1; parent\_gene=GRMZM2G445602'

'highly similar to ( 556) AT1G19250 | Symbols: FMO1 | FMO1 (FLAVIN-DEPENDENT MONOOXYGENASE 1);  
FAD binding / NADP or NADPH binding / electron carrier/ flavin-containing monooxygenase/ monooxygenase/  
oxidoreductase | chr1:6650656-6653053 REVERSEhighly similar to ( 833) loc\_os03g08410 12003.m06349 protein  
monooxygenase/ oxidoreductase, putative, expressed seq=cds; coord=1:17015718..17018487:1;  
parent\_gene=GRMZM2G000427'

'very weakly similar to (98.6) loc\_os03g08520 12003.m06360 protein expressed protein seq=cds;  
coord=1:17624743..17625481:-1; parent\_gene=GRMZM2G496991'

'nearly identical (1672) AT1G80490 | Symbols: TPR1 | TPR1 (TOPLESS-RELATED 1) | chr1:30261094-30266446  
REVERSEnearly identical (1944) loc\_os03g14980 12003.m101111 protein lissencephaly type-1-like homology motif,  
putative, expressed seq=cds; coord=1:35240624..35250929:-1; parent\_gene=GRMZM2G030422'

'weakly similar to ( 171) AT1G07960 | Symbols: ATPDIL5-1 | ATPDIL5-1 (PDI-like 5-1) | chr1:2467681-2468831  
FORWARDweakly similar to ( 197) loc\_os03g17860 12003.m101304 protein OsPDIL5-1 - Oryza sativa protein  
disulfide isomerase, expressed seq=cds; coord=1:44191574..44193212:-1; parent\_gene=GRMZM2G073628'

'highly similar to ( 622) AT2G40116 | Symbols: | phosphoinositide-specific phospholipase C family protein |  
chr2:16751782-16754311 FORWARDhighly similar to ( 848) loc\_os03g18010 12003.m07226 protein  
phosphoinositide-specific phospholipase C, putative, expressed seq=cds; coord=1:44996488..45002904:-1;  
parent\_gene=GRMZM2G114354'

'weakly similar to ( 188) AT1G07150 | Symbols: MAPKKK13 | MAPKKK13; ATP binding / kinase/ protein kinase/  
protein serine/threonine kinase | chr1:2194279-2195778 REVERSEvery weakly similar to (83.2) CDPK2\_MAIZE  
Calcium-dependent protein kinase 2 (EC 2.7.11.1) (CDPK 2) - Zea mays (Maize)moderately similar to ( 427)  
loc\_os03g18170 12003.m07242 protein mitogen-activated protein kinase kinase kinase 1, putative, expressed seq=cds;  
coord=1:45425093..45426565:1; parent\_gene=GRMZM2G459824'

'moderately similar to ( 248) AT2G30260 | Symbols: U2B" | U2B" (U2 small nuclear ribonucleoprotein B); RNA  
binding / nucleic acid binding / nucleotide binding | chr2:12905557-12907434 REVERSEmoderately similar to ( 323)  
loc\_os03g18720 12003.m35175 protein spliceosomal protein, putative, expressed seq=cds;  
coord=1:46622335..46627171:-1; parent\_gene=GRMZM2G153450'

'moderately similar to ( 404) AT2G47590 | Symbols: PHR2 | PHR2 (photolyase/blue-light receptor 2); DNA photolyase | chr2:19521888-19523732 FORWARDmoderately similar to ( 206) CRYD\_ORYSA Cryptochrome DASH, chloroplast/mitochondrial precursor - Oryza sativa (Rice)highly similar to ( 726) loc\_os03g22330 12003.m07635 protein photolyase/blue-light receptor PHR2, putative, expressed seq=cds; coord=1:57479256..57483149:1; parent\_gene=GRMZM2G158662'

'nearly identical (1066) AT5G27640 | Symbols: TIF3B1, EIF3B, ATEIF3B-1, EIF3B-1, ATTIF3B1 | TIF3B1 (TRANSLATION INITIATION FACTOR 3B1); nucleic acid binding / translation initiation factor | chr5:9781207-9784759 REVERSEnearly identical (1046) IF39\_TOBAC Eukaryotic translation initiation factor 3 subunit 9 (eIF-3 eta) (eIF3 p110) (eIF3b) - Nicotiana tabacum (Common tobacco)nearly identical (1300) loc\_os10g41960 12010.m06952 protein eukaryotic translation initiation factor 3 subunit 9, putative, expressed seq=cds; coord=1:96834561..96839284:-1; parent\_gene=GRMZM2G174757'

'weakly similar to ( 151) AT2G18040 | Symbols: PIN1AT | PIN1AT (PEPTIDYLPROLYL CIS/TRANS ISOMERASE, NIMA-INTERACTING 1); peptidyl-prolyl cis-trans isomerase | chr2:7842346-7843537 FORWARDweakly similar to ( 151) PIN1\_MALDO Peptidyl-prolyl cis-trans isomerase 1 (EC 5.2.1.8) (Rotamase Pin1) (PPIase Pin1) (MdPin1) - Malus domestica (Apple) (Malus sylvestris)weakly similar to ( 195) loc\_os04g56800 12004.m10567 protein peptidyl-prolyl cis-trans isomerase 1, putative, expressed seq=cds; coord=2:3366755..3373020:1; parent\_gene=GRMZM2G047590'

'highly similar to ( 541) AT3G51240 | Symbols: F3H, TT6, F3'H | F3H (FLAVANONE 3-HYDROXYLASE); naringenin 3-dioxygenase | chr3:19025409-19026658 FORWARDhighly similar to ( 570) FL3H\_HORVU Naringenin,2-oxoglutarate 3-dioxygenase (EC 1.14.11.9) (Flavonone-3-hydroxylase) (F3H) (FHT) - Hordeum vulgare (Barley)highly similar to ( 575) loc\_os04g56700 12004.m10557 protein naringenin,2-oxoglutarate 3-dioxygenase, putative, expressed seq=cds; coord=2:3556786..3558729:1; parent\_gene=GRMZM2G062396'

'highly similar to ( 541) AT3G51240 | Symbols: F3H, TT6, F3'H | F3H (FLAVANONE 3-HYDROXYLASE); naringenin 3-dioxygenase | chr3:19025409-19026658 FORWARDhighly similar to ( 570) FL3H\_HORVU Naringenin,2-oxoglutarate 3-dioxygenase (EC 1.14.11.9) (Flavonone-3-hydroxylase) (F3H) (FHT) - Hordeum vulgare (Barley)highly similar to ( 575) loc\_os04g56700 12004.m10557 protein naringenin,2-oxoglutarate 3-dioxygenase, putative, expressed seq=cds; coord=2:3556786..3558729:1; parent\_gene=GRMZM2G062396'

'highly similar to ( 748) AT1G11390 | Symbols: | ABC1 family protein | chr1:3834762-3837305 REVERSEnearly identical (1090) loc\_os04g56510 12004.m10540 protein protein kinase-like, putative, expressed seq=cds; coord=2:3859120..3863795:1; parent\_gene=GRMZM2G087201'

'moderately similar to ( 294) AT1G73110 | Symbols: | ribulose biphosphate carboxylase/oxygenase activase, putative / RuBisCO activase, putative | chr1:27494344-27496844 REVERSEmoderately similar to ( 202) RCA\_MAIZE Ribulose biphosphate carboxylase/oxygenase activase, chloroplast precursor (RuBisCO activase) (RA) - Zea mays (Maize)moderately similar to ( 344) loc\_os04g56320 12004.m10522 protein ribulose biphosphate carboxylase/oxygenase activase, chloroplast precursor, putative, expressed seq=cds; coord=2:4159971..4163217:1; parent\_gene=GRMZM2G039345'

'highly similar to ( 536) AT1G71230 | Symbols: CSN5B, CSN5, AJH2 | CSN5B (COP9-SIGNALOSOME 5B); protein binding | chr1:26852560-26854255 FORWARDhighly similar to ( 643) loc\_os04g56070 12004.m101676 protein COP9 signalosome complex subunit 5b, putative, expressed seq=cds; coord=2:4687656..4692442:1; parent\_gene=GRMZM2G086801'

'moderately similar to ( 255) AT3G54420 | Symbols: ATEP3, ATCHITIV, CHIV | ATEP3; chitinase | chr3:20145935-20147034 FORWARDmoderately similar to ( 295) CHIA\_MAIZE Endochitinase A precursor (EC 3.2.1.14) (Seed chitinase A) - Zea mays (Maize)moderately similar to ( 303) loc\_os04g41680 12004.m09144 protein endochitinase A precursor, putative, expressed seq=cds; coord=2:33537139..33539360:1; parent\_gene=GRMZM2G052175'

'weakly similar to ( 146) AT1G68810 | Symbols: | basic helix-loop-helix (bHLH) family protein | chr1:25861289-25862882 FORWARDmoderately similar to ( 253) loc\_os09g24490 12009.m05603 protein helix-loop-helix DNA-binding domain containing protein, expressed seq=cds; coord=2:180155096..180158005:-1; parent\_gene=GRMZM2G176141'

'moderately similar to ( 437) AT5G10930 | Symbols: CIPK5, SnRK3.24 | CIPK5 (CBL-INTERACTING PROTEIN KINASE 5); ATP binding / kinase/ protein kinase/ protein serine/threonine kinase | chr5:3445569-3446906 REVERSEmoderately similar to ( 337) CIPK1\_ORYSA CIPK-like protein 1 (EC 2.7.11.1) (OsCK1) - Oryza sativa (Rice)highly similar to ( 634) loc\_os09g25090 12009.m05662 protein CIPK-like protein 1, putative, expressed seq=cds; coord=2:180525710..180527829:1; parent\_gene=GRMZM2G330049'

'moderately similar to ( 397) AT5G07990 | Symbols: TT7, CYP75B1, D501 | TT7 (TRANSPARENT TESTA 7); flavonoid 3'-monooxygenase/ oxygen binding | chr5:2560437-2562859 FORWARDmoderately similar to ( 405) F3PH\_PETHY Flavonoid 3'-monooxygenase (EC 1.14.13.21) (Flavonoid 3'-hydroxylase) (Cytochrome P450 75B2) - Petunia hybrida (Petunia)highly similar to ( 893) loc\_os09g26960 12009.m05848 protein flavonoid 3-monooxygenase, putative, expressed seq=cds; coord=2:184258075..184260458:1; parent\_gene=GRMZM2G125482'

'moderately similar to ( 391) AT1G06240 | Symbols: | unknown protein | chr1:1911166-1912875 FORWARDhighly similar to ( 569) loc\_os01g11590 12001.m42918 protein expressed protein seq=cds; coord=3:3448711..3456996:-1; parent\_gene=GRMZM2G400907'

'moderately similar to ( 238) AT1G78440 | Symbols: ATGA2OX1 | ATGA2OX1 (gibberellin 2-oxidase 1); gibberellin 2-beta-dioxygenase | chr1:29511772-29512990 REVERSEmoderately similar to ( 262) G2OX1\_PEA Gibberellin 2-beta-dioxygenase 1 (EC 1.14.11.13) (Gibberellin 2-beta-hydroxylase 1) (Gibberellin 2-oxidase 1) (GA 2-oxidase 1) (Protein SLENDER) - Pisum sativum (Garden pea)moderately similar to ( 365) loc\_os01g11150 12001.m07735 protein gibberellin 2-beta-dioxygenase, putative, expressed seq=cds; coord=3:3994128..3996072:1; parent\_gene=GRMZM2G031432'

'weakly similar to ( 173) AT5G26751 | Symbols: ATSK11, SK 11 | ATSK11; protein kinase/ protein serine/threonine kinase | chr5:9399582-9401839 REVERSEweakly similar to ( 173) MSK3\_MEDSA Glycogen synthase kinase-3 homolog MsK-3 (EC 2.7.11.1) - Medicago sativa (Alfalfa)weakly similar to ( 175) loc\_os05g04340 12005.m27537 protein glycogen synthase kinase-3 homolog MsK-1, putative, expressed seq=cds; coord=3:5009151..5011123:1; parent\_gene=GRMZM2G477073'



'highly similar to ( 516) AT3G17510 | Symbols: CIPK1, SnRK3.16 | CIPK1 (CBL-INTERACTING PROTEIN KINASE 1); kinase/ protein binding | chr3:5989309-5992627 REVERSEmoderately similar to ( 389) CIPK1\_ORYSA CIPK-like protein 1 (EC 2.7.11.1) (OsCK1) - Oryza sativa (Rice)highly similar to ( 749) loc\_os01g18800 12001.m150556 protein CBL-interacting serine/threonine-protein kinase 1, putative, expressed seq=cds; coord=3:50604991..50610043:-1; parent\_gene=GRMZM2G170120'

'highly similar to ( 706) AT1G36370 | Symbols: SHM7 | SHM7 (serine hydroxymethyltransferase 7); catalytic/ glycine hydroxymethyltransferase/ pyridoxal phosphate binding | chr1:13696240-13698576 REVERSEmoderately similar to ( 466) GLYM\_SOLTU Serine hydroxymethyltransferase, mitochondrial precursor (EC 2.1.2.1) (Serine methylase) (Glycine hydroxymethyltransferase) (SHMT) - Solanum tuberosum (Potato)highly similar to ( 861) loc\_os01g65410 12001.m12653 protein serine hydroxymethyltransferase, mitochondrial precursor, putative, expressed seq=cds; coord=3:173376685..173382485:-1; parent\_gene=GRMZM2G452630'

'highly similar to ( 569) AT2G16570 | Symbols: ATASE, ATASE1 | ATASE1 (GLN PHOSPHORIBOSYL PYROPHOSPHATE AMIDOTRANSFERASE 1); amidophosphoribosyltransferase | chr2:7180424-7182124 REVERSEhighly similar to ( 562) PUR1\_SOYBN Amidophosphoribosyltransferase, chloroplast precursor (EC 2.4.2.14) (Glutamine phosphoribosylpyrophosphate amidotransferase) (ATASE) (GPAT) - Glycine max (Soybean)highly similar to ( 800) loc\_os01g65260 12001.m12639 protein amidophosphoribosyltransferase, chloroplast precursor, putative, expressed seq=cds; coord=3:173801386..173803474:1; parent\_gene=GRMZM2G339699'

'highly similar to ( 505) AT1G10940 | Symbols: ASK1, SNRK2-4, SNRK2.4, SRK2A | SNRK2.4 (SNF1-RELATED PROTEIN KINASE 2.4); kinase | chr1:3656050-3658170 REVERSEhighly similar to ( 608) SAPK4\_ORYSA Serine/threonine-protein kinase SAPK4 (EC 2.7.11.1) (Osmotic stress/abscisic acid-activated protein kinase 4) - Oryza sativa (Rice)highly similar to ( 608) loc\_os01g64970 12001.m12610 protein serine/threonine-protein kinase SAPK4, putative, expressed seq=cds; coord=3:174770228..174775665:-1; parent\_gene=GRMZM2G110922'

'very weakly similar to (94.4) loc\_os01g24950 12001.m150578 protein exocyst complex subunit Sec15-like family protein, expressed seq=cds; coord=3:175323602..175324361:-1; parent\_gene=GRMZM2G439532'

'moderately similar to ( 307) AT3G19510 | Symbols: HAT3.1 | HAT3.1; DNA binding / sequence-specific DNA binding / transcription activator/ transcription factor | chr3:6763205-6766049 REVERSEmoderately similar to ( 490) HOX1A\_MAIZE Homeobox protein HOX1A - Zea mays (Maize)highly similar to ( 667) loc\_os06g12400 12006.m05957 protein homeobox protein HOX1A, putative, expressed seq=cds; coord=3:197392618..197405889:-1; parent\_gene=GRMZM2G314546'

'nearly identical (1195) AT1G06410 | Symbols: ATTPS7, TPS7, ATTPSA | ATTPS7; alpha,alpha-trehalose-phosphate synthase (UDP-forming)/ transferase, transferring glycosyl groups / trehalose-phosphatase | chr1:1955413-1958153 FORWARDnearly identical (1543) loc\_os01g54560 12001.m150713 protein trehalose synthase, putative, expressed seq=cds; coord=3:197947785..197952726:-1; parent\_gene=GRMZM2G123277'

'moderately similar to ( 476) AT2G24370 | Symbols: | ATP binding / kinase/ protein kinase/ protein serine/threonine kinase | chr2:10369979-10373063 REVERSEweakly similar to ( 165) NORK\_PEA Nodulation receptor kinase precursor (EC 2.7.11.1) - Pisum sativum (Garden pea)highly similar to ( 608) loc\_os01g39970 12001.m10270 protein serine threonine kinase 1, putative, expressed seq=cds; coord=3:220702531..220705512:1; parent\_gene=GRMZM2G070961'

'moderately similar to ( 427) AT4G13340 | Symbols: | leucine-rich repeat family protein / extensin family protein | chr4:7758610-7760892 FORWARDweakly similar to ( 120) RPK1\_IPONI Receptor-like protein kinase precursor (EC 2.7.11.1) - Ipomoea nil (Japanese morning glory) (Pharbitis nil)highly similar to ( 580) loc\_os01g41120 12001.m10381 protein protein binding protein, putative, expressed seq=cds; coord=3:222594542..222596230:1; parent\_gene=GRMZM2G333811'

'very weakly similar to (91.7) AT2G37740 | Symbols: ATZFP10, ZFP10 | ZFP10 (ZINC-FINGER PROTEIN 10); nucleic acid binding / transcription factor/ zinc ion binding | chr2:15827706-15828620 REVERSEweakly similar to ( 124) loc\_os07g01180 12007.m04599 protein zinc finger, C2H2 type family protein seq=cds; coord=4:609416..610872:1; parent\_gene=GRMZM2G058868'

'nearly identical (1254) AT5G07350 | Symbols: | tudor domain-containing protein / nuclease family protein | chr5:2319790-2324892 REVERSEnearly identical (1683) loc\_os02g32350 12002.m33392 protein 4SNc-Tudor domain protein, putative, expressed seq=cds; coord=4:94432879..94438375:1; parent\_gene=AC207890.3\_FG002'

'very weakly similar to (95.1) AT4G27090 | Symbols: | 60S ribosomal protein L14 (RPL14B) | chr4:13594104-13595187 REVERSEvery weakly similar to (93.6) RL14\_PEA Probable 60 ribosomal protein L14 (Hydroxyproline-rich glycoprotein HRGP1) - Pisum sativum (Garden pea)weakly similar to ( 117) loc\_os04g43540 12004.m09314 protein 60 ribosomal protein L14, putative, expressed seq=cds; coord=4:111487916..111492785:1; parent\_gene=GRMZM2G323971'

'moderately similar to ( 266) AT1G67590 | Symbols: | remorin family protein | chr1:25333255-25334472 REVERSEweakly similar to ( 166) loc\_os03g02840 12003.m101163 protein DNA binding protein, putative, expressed seq=cds; coord=4:119470971..119472897:1; parent\_gene=GRMZM2G009019'

'moderately similar to ( 353) AT1G47500 | Symbols: ATRBP47C' | ATRBP47C' (RNA-binding protein 47C'); RNA binding | chr1:17432682-17434805 FORWARDvery weakly similar to (86.3) ROC1\_NICSY 29 kDa ribonucleoprotein A, chloroplast precursor (CP29A) - Nicotiana sylvestris (Wood tobacco)highly similar to ( 527) loc\_os04g37690 12004.m35140 protein nucleic acid binding protein, putative, expressed seq=cds; coord=4:122869806..122879188:1; parent\_gene=GRMZM2G069678'

'weakly similar to ( 108) AT4G33565 | Symbols: | protein binding / zinc ion binding | chr4:16136821-16137924 FORWARDweakly similar to ( 175) loc\_os02g36330 12002.m08720 protein RING-H2 finger protein ATL10, putative, expressed seq=cds; coord=4:123185031..123186547:-1; parent\_gene=GRMZM2G041344'

'highly similar to ( 683) AT5G64300 | Symbols: ATGCH, GCH, ATRIBA1, RFD1 | ATGCH; 3,4-dihydroxy-2-butanone-4-phosphate synthase/ GTP cyclohydrolase II | chr5:25718459-25720790 FORWARDhighly similar to ( 876) loc\_os02g36340 12002.m33397 protein riboflavin biosynthesis protein ribAB, chloroplast precursor, putative, expressed seq=cds; coord=4:123331634..123336680:-1; parent\_gene=GRMZM2G156803'

'weakly similar to ( 139) AT1G23220 | Symbols: | dynein light chain type 1 family protein | chr1:8242614-8244136 FORWARDweakly similar to ( 190) loc\_os02g36990 12002.m08787 protein microtubule motor, putative, expressed seq=cds; coord=4:126474274..126476909:-1; parent\_gene=GRMZM2G145027'

'moderately similar to ( 301) AT5G61380 | Symbols: TOC1, APRR1, PRR1 | TOC1 (TIMING OF CAB EXPRESSION 1); transcription regulator/ two-component response regulator | chr5:24675540-24678176 FORWARDhighly similar to ( 734) PRR1\_ORYSA Two-component response regulator-like PRR1 (Pseudo-response regulator 1) (OsPRR1) - Oryza sativa (Rice)highly similar to ( 734) loc\_os02g40510 12002.m33775 protein two-component response regulator-like PRR1, putative, expressed seq=cds; coord=4:140699189..140702237:1; parent\_gene=GRMZM2G020081'

'moderately similar to ( 495) AT5G22300 | Symbols: NIT4 | NIT4 (NITRILASE 4); 3-cyanoalanine hydratase/ cyanoalanine nitrilase/ indole-3-acetonitrile nitrilase/ nitrilase/ nitrile hydratase | chr5:7379401-7381764 FORWARDhighly similar to ( 530) NRL4\_TOBAC Nitrilase 4 (EC 3.5.5.1) - Nicotiana tabacum (Common tobacco)highly similar to ( 644) loc\_os02g42350 12002.m100293 protein nitrilase 4, putative, expressed seq=cds; coord=4:145562864..145569248:1; parent\_gene=GRMZM2G111225'

'highly similar to ( 650) AT2G20300 | Symbols: ALE2 | ALE2 (Abnormal Leaf Shape 2); kinase | chr2:8756475-8759845 REVERSEmoderately similar to ( 228) NORR\_MEDTR Nodulation receptor kinase precursor (EC 2.7.11.1) (Does not make infections protein 2) (Symbiosis receptor-like kinase) (MtSYMRK) - Medicago truncatula (Barrel medic)highly similar to ( 922) loc\_os02g57080 12002.m33474 protein ATP binding protein, putative, expressed seq=cds; coord=4:171665330..171672226:1; parent\_gene=GRMZM2G102163'

'nearly identical (1070) AT1G60070 | Symbols: | binding / clathrin binding / protein binding / protein transporter | chr1:22142944-22149296 REVERSEnearly identical (1324) loc\_os06g07090 12006.m091619 protein AP-1 complex subunit gamma-1, expressed seq=cds; coord=4:173209988..173224508:-1; parent\_gene=GRMZM2G054210'

'moderately similar to ( 407) AT1G79650 | Symbols: RAD23 | RAD23; damaged DNA binding | chr1:29972406-29975132 REVERSEmoderately similar to ( 300) RAD23\_ORYSA Probable DNA repair protein RAD23 (OsRAD23) - Oryza sativa (Rice)highly similar to ( 522) loc\_os02g08300 12002.m06176 protein DNA repair protein RAD23-1, putative, expressed seq=cds; coord=4:234901650..234908817:1; parent\_gene=GRMZM2G143462'

'moderately similar to ( 408) AT3G02875 | Symbols: ILR1 | ILR1 (IAA-LEUCINE RESISTANT 1); IAA-Leu conjugat hydrolase/ IAA-Phe conjugate hydrolase/ metallopeptidase | chr3:631993-633859 FORWARDhighly similar to ( 581) loc\_os03g62060 12003.m11084 protein IAA-amino acid hydrolase ILR1 precursor, putative, expressed seq=cds; coord=5:1569535..1572475:-1; parent\_gene=GRMZM2G125552'

'highly similar to ( 516) AT2G28930 | Symbols: APK1B | APK1B; ATP binding / kinase/ protein kinase/ protein serine/threonine kinase | chr2:12424551-12426565 FORWARDmoderately similar to ( 236) NORR\_MEDTR Nodulation receptor kinase precursor (EC 2.7.11.1) (Does not make infections protein 2) (Symbiosis receptor-like kinase) (MtSYMRK) - Medicago truncatula (Barrel medic)highly similar to ( 631) loc\_os03g60710 12003.m10960 protein protein kinase APK1B, chloroplast precursor, putative, expressed seq=cds; coord=5:2283771..2290049:-1; parent\_gene=GRMZM2G144042'

'moderately similar to ( 270) AT1G75560 | Symbols: | zinc knuckle (CCHC-type) family protein | chr1:28371420-28372717 REVERSEmoderately similar to ( 389) loc\_os03g60600 12003.m10949 protein cellular nucleic acid-binding protein, putative, expressed seq=cds; coord=5:2358363..2361474:1; parent\_gene=GRMZM2G003068'

'weakly similar to ( 119) loc\_os03g60570 12003.m10946 protein zinc finger DNA-binding protein, putative, expressed seq=cds; coord=5:2365726..2366372:-1; parent\_gene=GRMZM2G002815'

'weakly similar to ( 172) loc\_os02g30810 12002.m08224 protein OsSAUR10 - Auxin-responsive SAUR gene family member, expressed seq=cds; coord=5:164364957..164366457:-1; parent\_gene=GRMZM2G312274'

'moderately similar to ( 308) AT3G50700 | Symbols: AtIDD2 | AtIDD2 (Arabidopsis thaliana Indeterminate(ID)-Domain 2); nucleic acid binding / transcription factor/ zinc ion binding | chr3:18840945-18842829 FORWARDhighly similar to ( 734) loc\_os02g31890 12002.m08282 protein zinc finger, C2H2-type, putative seq=cds; coord=5:166856814..166859192:1; parent\_gene=GRMZM2G320287'

highly similar to ( 606) AT2G32990 | Symbols: AtGH9B8 | AtGH9B8 (Arabidopsis thaliana glycosyl hydrolase 9B8); catalytic/ hydrolase, hydrolyzing O-glycosyl compounds | chr2:14003361-14005844 FORWARDhighly similar to ( 809) GUN7\_ORYSA Endoglucanase 7 precursor (EC 3.2.1.4) (Endo-1,4-beta glucanase 7) (OsGLU10) - Oryza sativa (Rice)highly similar to ( 809) loc\_os02g50490 12002.m10083 protein endoglucanase 1 precursor, putative, expressed seq=cds; coord=5:205562436..205565933:1; parent\_gene=GRMZM2G151257'

'weakly similar to ( 118) loc\_os02g51550 12002.m10188 protein expressed protein seq=cds; coord=5:208070590..208072068:1; parent\_gene=GRMZM2G036286'

'moderately similar to ( 267) AT1G72650 | Symbols: TRFL6 | TRFL6 (TRF-LIKE 6); DNA binding / transcription factor | chr1:27350253-27353483 FORWARDhighly similar to ( 692) loc\_os02g53670 12002.m100379 protein TRFL6, putative, expressed seq=cds; coord=5:211705203..211716883:1; parent\_gene=GRMZM2G049194'

'weakly similar to ( 112) AT5G04260 | Symbols: WCRKC2 | WCRKC2 (WCRKC THIOREDOXIN 2) | chr5:1178901-1180022 REVERSEweakly similar to ( 136) loc\_os02g57380 12002.m33948 protein thioredoxin-like 8, chloroplast precursor, putative, expressed seq=cds; coord=5:215924063..215926694:-1; parent\_gene=GRMZM2G003028'

'highly similar to ( 848) AT3G51070 | Symbols: | dehydration-responsive protein-related | chr3:18969068-18972291 FORWARDnearly identical (1068) loc\_os06g49860 12006.m09510 protein ankyrin-like protein, putative, expressed seq=cds; coord=6:84676115..84679470:-1; parent\_gene=GRMZM2G387935'

'weakly similar to ( 184) AT1G56170 | Symbols: HAP5B, ATHAP5B, NF-YC2 | NF-YC2 (NUCLEAR FACTOR Y, SUBUNIT C2); DNA binding / transcription activator/ transcription factor | chr1:21025118-21025717 FORWARDmoderately similar to ( 241) loc\_os02g07450 12002.m33577 protein nuclear transcription factor Y subunit C-2, putative, expressed seq=cds; coord=6:93496825..93502006:-1; parent\_gene=GRMZM2G161680'

'moderately similar to ( 362) AT3G57670 | Symbols: NTT | NTT (NO TRANSMITTING TRACT); nucleic acid binding / transcription factor/ zinc ion binding | chr3:21370936-21373121 FORWARDmoderately similar to ( 430) loc\_os06g40960 12006.m08631 protein zinc finger protein, putative, expressed seq=cds; coord=6:117676121..117679658:1; parent\_gene=GRMZM2G435357'

'very weakly similar to (93.6) AT2G04410 | Symbols: | FUNCTIONS IN: molecular\_function unknown; INVOLVED IN: biological\_process unknown; LOCATED IN: plasma membrane; EXPRESSED IN: 24 plant structures; EXPRESSED DURING: 15 growth stages; CONTAINS InterPro DOMAIN/s: Defence response, Rin4 (InterPro:IPR008700); BEST Arabidopsis thaliana protein match is: NOI (TAIR:AT5G55850.1); Has 141 Blast hits to 140 proteins in 13 species: Archae - 0; Bacteria - 0; Metazoa - 0; Fungi - 0; Plants - 139; Viruses - 0; Other Eukaryotes - 2 (source: NCBI BLINK). | chr2:1534012-1535040 REVERSEweakly similar to ( 135) loc\_os06g17870 12006.m06499 protein nitrate-induced NOI protein, putative, expressed seq=cds; coord=6:119855348..119858902:1; parent\_gene=GRMZM2G162788'

'weakly similar to ( 189) AT1G10030 | Symbols: ERG28 | ERG28 (Arabidopsis homolog of yeast ergosterol28) | chr1:3273972-3275631 FORWARDmoderately similar to ( 219) loc\_os12g43670 12012.m08141 protein erg28 like protein, expressed seq=cds; coord=6:124134969..124141392:1; parent\_gene=GRMZM2G003064'

'moderately similar to ( 366) AT2G36770 | Symbols: | UDP-glucuronosyl/UDP-glucosyl transferase family protein | chr2:15415227-15416717 REVERSEweakly similar to ( 190) CZOG\_SORBI Putative cis-zeatin O-glucosyltransferase (EC 2.4.1.215) - Sorghum bicolor (Sorghum) (Sorghum vulgare)highly similar to ( 630) loc\_os05g08480 12005.m05364 protein cytokinin-O-glucosyltransferase 1, putative, expressed seq=cds; coord=6:128420261..128421880:1; parent\_gene=GRMZM2G458776'

'moderately similar to ( 375) AT4G25730 | Symbols: | FtsJ-like methyltransferase family protein | chr4:13102906-13106718 REVERSEhighly similar to ( 537) loc\_os05g49230 12005.m08993 protein adoMet-dependent rRNA methyltransferase spb1, putative, expressed seq=cds; coord=6:165089250..165094681:1; parent\_gene=GRMZM2G128579'

'weakly similar to ( 127) AT2G30933 | Symbols: | FUNCTIONS IN: molecular\_function unknown; INVOLVED IN: biological\_process unknown; LOCATED IN: endomembrane system; CONTAINS InterPro DOMAIN/s: X8 (InterPro:IPR012946); BEST Arabidopsis thaliana protein match is: glucan endo-1,3-beta-glucosidase-related (TAIR:AT1G09460.1); Has 762 Blast hits to 726 proteins in 32 species: Archae - 0; Bacteria - 0; Metazoa - 0; Fungi - 2; Plants - 759; Viruses - 0; Other Eukaryotes - 1 (source: NCBI BLINK). | chr2:13165235-13166517 REVERSEvery weakly similar to (85.5) E13B\_WHEAT Glucan endo-1,3-beta-glucosidase precursor (EC 3.2.1.39) ((1->3)-beta-glucan endohydrolase) ((1->3)-beta-glucanase) (Beta-1,3-endoglucanase) - Triticum aestivum (Wheat)moderately similar to ( 205) loc\_os05g50490 12005.m27988 protein expressed protein seq=cds; coord=6:166809944..166811348:-1; parent\_gene=GRMZM2G163883'

'weakly similar to ( 127) AT2G30933 | Symbols: | FUNCTIONS IN: molecular\_function unknown; INVOLVED IN: biological\_process unknown; LOCATED IN: endomembrane system; CONTAINS InterPro DOMAIN/s: X8 (InterPro:IPR012946); BEST Arabidopsis thaliana protein match is: glucan endo-1,3-beta-glucosidase-related (TAIR:AT1G09460.1); Has 762 Blast hits to 726 proteins in 32 species: Archae - 0; Bacteria - 0; Metazoa - 0; Fungi - 2; Plants - 759; Viruses - 0; Other Eukaryotes - 1 (source: NCBI BLINK). | chr2:13165235-13166517 REVERSEvery weakly similar to (85.5) E13B\_WHEAT Glucan endo-1,3-beta-glucosidase precursor (EC 3.2.1.39) ((1->3)-beta-glucan endohydrolase) ((1->3)-beta-glucanase) (Beta-1,3-endoglucanase) - Triticum aestivum (Wheat)moderately similar to ( 205) loc\_os05g50490 12005.m27988 protein expressed protein seq=cds; coord=6:166809944..166811348:-1; parent\_gene=GRMZM2G163883'

'very weakly similar to ( 94.7) AT2G35910 | Symbols: | zinc finger (C3HC4-type RING finger) family protein | chr2:15073225-15073878 REVERSEweakly similar to ( 152) loc\_os07g06560 12007.m05116 protein RING-H2 finger protein ATL2L, putative seq=cds; coord=7:6139033..6139646:1; parent\_gene=GRMZM2G029623'

'moderately similar to ( 201) AT3G22800 | Symbols: | leucine-rich repeat family protein / extensin family protein | chr3:8063063-8064475 REVERSEmoderately similar to ( 287) loc\_os07g07990 12007.m05258 protein receptor protein kinase CLAVATA1 precursor, putative, expressed seq=cds; coord=7:9340555..9341531:-1; parent\_gene=GRMZM2G153741'

'highly similar to ( 560) AT1G73100 | Symbols: SUVH3, SDG19 | SUVH3 (SU(VAR)3-9 HOMOLOG 3); histone methyltransferase | chr1:27491970-27493979 FORWARDnearly identical (1170) loc\_os11g38900 12011.m07738 protein histone-lysine N-methyltransferase, H3 lysine-9 specific SUVH1, putative, expressed seq=cds; coord=7:20244021..20246591:1; parent\_gene=AC233961.1\_FG001'

'moderately similar to ( 207) AT4G19680 | Symbols: IRT2 | IRT2; iron ion transmembrane transporter/ zinc ion transmembrane transporter | chr4:10703385-10704621 FORWARDmoderately similar to ( 393) loc\_os07g12890 12007.m28960 protein ZIP zinc/iron transport family protein, expressed seq=cds; coord=7:21798962..21800971:-1; parent\_gene=GRMZM2G093276'

'weakly similar to ( 160) AT4G34960 | Symbols: | peptidyl-prolyl cis-trans isomerase, putative / cyclophilin, putative / rotamase, putative | chr4:16648865-16650646 FORWARDweakly similar to ( 102) CYPH\_MAIZE Peptidyl-prolyl cis-trans isomerase (EC 5.2.1.8) (PPIase) (Rotamase) (Cyclophilin) (Cyclosporin A-binding protein) - Zea mays (Maize)weakly similar to ( 175) loc\_os09g36670 12009.m06616 protein peptidyl-prolyl cis-trans isomerase CYP19-4 precursor, putative, expressed seq=cds; coord=7:30423336..30427964:1; parent\_gene=GRMZM2G092072'

'very weakly similar to ( 100) AT3G45280 | Symbols: SYP72, ATSYP72 | SYP72 (SYNTAXIN OF PLANTS 72); protein transporter | chr3:16611445-16613304 REVERSEweakly similar to ( 136) loc\_os09g19550 12009.m05163 protein syntaxin 72, putative seq=cds; coord=7:95533897..95534429:1; parent\_gene=GRMZM2G360648'

'highly similar to ( 600) AT5G15080 | Symbols: | protein kinase, putative | chr5:4886414-4888555 FORWARDmoderately similar to ( 217) NORK\_PEA Nodulation receptor kinase precursor (EC 2.7.11.1) - Pisum sativum (Garden pea)highly similar to ( 801) loc\_os09g19700 12009.m05178 protein protein kinase APK1A, chloroplast precursor, putative, expressed seq=cds; coord=7:97336351..97341531:1; parent\_gene=GRMZM2G132184'

'very weakly similar to (97.4) AT5G08690 | Symbols: | ATP synthase beta chain 2, mitochondrial | chr5:2825739-2828352 FORWARDweakly similar to ( 101) ATPBM\_ORYSA ATP synthase subunit beta, mitochondrial precursor (EC 3.6.3.14) - Oryza sativa (Rice)weakly similar to ( 101) loc\_os05g47980 12005.m08870 protein ATP synthase beta chain, mitochondrial precursor, putative, expressed seq=cds; coord=7:9768813..97735034:1; parent\_gene=GRMZM2G405751'

'highly similar to ( 532) AT5G10190 | Symbols: | transporter-related | chr5:3199205-3201140 FORWARDhighly similar to ( 606) loc\_os09g20490 12009.m05256 protein carbohydrate transporter/ sugar porter/ transporter, putative, expressed seq=cds; coord=7:100804201..100808837:-1; parent\_gene=GRMZM2G176721'

'weakly similar to ( 171) loc\_os04g02280 12004.m05541 protein F-box domain containing protein, expressed seq=cds; coord=7:114992560..114994386:1; parent\_gene=GRMZM2G015349'

'moderately similar to ( 237) AT4G03140 | Symbols: | binding / catalytic/ oxidoreductase | chr4:1392191-1393662 FORWARDweakly similar to ( 192) TS2\_MAIZE Sex determination protein tasselseed-2 - Zea mays (Maize)moderately similar to ( 368) loc\_os07g40250 12007.m08266 protein sex determination protein tasselseed-2, putative, expressed seq=cds; coord=7:162398192..162399451:1; parent\_gene=GRMZM2G076981'

'weakly similar to ( 128) AT2G45100 | Symbols: | RNA polymerase II transcription factor/ protein binding / transcription activator/ transcription regulator/ translation initiation factor/ zinc ion binding | chr2:18595348-18598088 REVERSEweakly similar to ( 186) loc\_os05g23940 12005.m06688 protein RNA polymerase II transcription factor/ transcription factor/ zinc ion binding protein, putative, expressed seq=cds; coord=9:2736110..2739733:-1; parent\_gene=GRMZM2G180836'

'highly similar to ( 505) AT5G65090 | Symbols: MRH3, BST1, DER4 | BST1 (BRISTLED 1); hydrolase/ inositol or phosphatidylinositol phosphatase | chr5:26004837-26006656 FORWARDhighly similar to ( 706) loc\_os06g11920 12006.m05909 protein hydrolase/ inositol or phosphatidylinositol phosphatase, putative, expressed seq=cds; coord=9:6006293..6008457:-1; parent\_gene=GRMZM2G093772'

'weakly similar to ( 176) AT4G34990 | Symbols: AtMYB32 | AtMYB32 (myb domain protein 32); DNA binding / transcription factor | chr4:16661370-16662289 REVERSEmoderately similar to ( 426) MYBC\_MAIZE Anthocyanin regulatory C1 protein - Zea mays (Maize)moderately similar to ( 276) loc\_os06g10350 12006.m05753 protein anthocyanin regulatory C1 protein, putative, expressed seq=cds; coord=9:9740803..9741876:-1; parent\_gene=GRMZM2G005066'

'moderately similar to ( 209) AT3G10610 | Symbols: | 40S ribosomal protein S17 (RPS17C) | chr3:3319459-3319881 FORWARDmoderately similar to ( 263) loc\_os10g27190 12010.m05653 protein 40S ribosomal protein S17-4, putative, expressed seq=cds; coord=9:10319530..10320398:-1; parent\_gene=GRMZM2G086906'

'highly similar to ( 765) AT2G36530 | Symbols: LOS2 | LOS2; copper ion binding / phosphopyruvate hydratase | chr2:15321081-15323786 REVERSEhighly similar to ( 882) ENO1\_MAIZE Enolase 1 (EC 4.2.1.11) (2-phosphoglycerate dehydratase 1) (2-phospho-D-glycerate hydro-lyase 1) - Zea mays (Maize)highly similar to ( 846) loc\_os06g04510 12006.m05181 protein enolase 1, putative, expressed seq=cds; coord=9:22100864..22105552:1; parent\_gene=GRMZM2G064302'

'nearly identical (1174) AT4G13780 | Symbols: | methionine--tRNA ligase, putative / methionyl-tRNA synthetase, putative / MetRS, putative | chr4:7993366-7998433 REVERSEnearly identical (1429) SYM\_ORYSA Probable methionyl-tRNA synthetase (EC 6.1.1.10) (Methionine--tRNA ligase) (MetRS) - Oryza sativa (Rice)nearly identical (1429) loc\_os06g31210 12006.m07662 protein methionyl-tRNA synthetase, putative, expressed seq=cds; coord=9:146664972..146673514:1; parent\_gene=GRMZM2G143450'

'moderately similar to ( 245) AT2G18540 | Symbols: | cupin family protein | chr2:8042382-8045008 REVERSEmoderately similar to ( 475) loc\_os03g10110 12003.m06465 protein preproMP73, putative, expressed seq=cds; coord=9:148445803..148448625:-1; parent\_gene=GRMZM2G078441'

'weakly similar to ( 113) AT5G65320 | Symbols: | basic helix-loop-helix (bHLH) family protein | chr5:26107368-26108640 REVERSEmoderately similar to ( 253) loc\_os03g08930 12003.m35054 protein helix-loop-helix-like protein, putative, expressed seq=cds; coord=9:149664143..149665651:-1; parent\_gene=AC233899.1\_FG002'

'nearly identical (1081) AT3G59420 | Symbols: ACR4 | ACR4 (ARABIDOPSIS CRINKLY4); kinase/ transmembrane receptor protein kinase | chr3:21959871-21962558 REVERSEnearly identical (1823) CRI4\_MAIZE Putative receptor protein kinase CRINKLY4 precursor (EC 2.7.11.1) - Zea mays (Maize)nearly identical (1608) loc\_os03g43670 12003.m09410 protein receptor protein kinase CRINKLY4 precursor, putative, expressed seq=cds; coord=10:5587952..5591862:1; parent\_gene=GRMZM2G051637'

'highly similar to ( 706) AT3G14390 | Symbols: | diaminopimelate decarboxylase, putative / DAP carboxylase, putative | chr3:4806771-4808954 FORWARDhighly similar to ( 791) loc\_os02g24354 12002.m07582 protein diaminopimelate decarboxylase, putative, expressed seq=cds; coord=10:5718777..5728532:-1; parent\_gene=GRMZM2G020446'

'moderately similar to ( 331) AT5G04770 | Symbols: ATCAT6, CAT6 | CAT6 (CATIONIC AMINO ACID TRANSPORTER 6); amino acid transmembrane transporter/ basic amino acid transmembrane transporter/ cationic amino acid transmembrane transporter | chr5:1379118-1382304 FORWARDmoderately similar to ( 410) loc\_os12g06060 12012.m04597 protein high-affinity cationic amino acid transporter 1, putative, expressed seq=cds; coord=10:6163655..6165665:-1; parent\_gene=AC207755.3\_FG005'

'moderately similar to ( 317) AT2G22240 | Symbols: ATMIPS2, MIPS2 | MIPS2 (MYO-INOSITOL-1-PHOSPHATE SYNTHASE 2); binding / catalytic/ inositol-3-phosphate synthase | chr2:9451901-9453375 REVERSEmoderately similar to ( 330) INO1\_MAIZE Inositol-3-phosphate synthase (EC 5.5.1.4) (Myo-inositol-1-phosphate synthase) (MI-1-P synthase) (IPS) - Zea mays (Maize)moderately similar to ( 325) loc\_os03g09250 12003.m35064 protein inositol-3-phosphate synthase, putative, expressed seq=cds; coord=10:11403432..11413687:-1; parent\_gene=GRMZM2G392513'

'highly similar to ( 514) AT4G02500 | Symbols: ATXT2, XXT2, XT2 | XT2 (UDP-XYLOSYLTRANSFERASE 2); UDP-xylosyltransferase/ transferase/ transferase, transferring glycosyl groups / xyloglucan 6-xylosyltransferase | chr4:1101638-1103345 FORWARDhighly similar to ( 543) loc\_os03g18820 12003.m101316 protein glycosyltransferase 5, putative, expressed seq=cds; coord=10:135008283..135011071:1; parent\_gene=GRMZM2G031453'

'very weakly similar to (87.4) AT1G28050 | Symbols: | zinc finger (B-box type) family protein | chr1:9775768-9777657 REVERSEmoderately similar to ( 486) loc\_os08g42440 12008.m08222 protein CCT motif family protein, expressed seq=cds; coord=1:195557037..195561667:-1; parent\_gene=GRMZM2G159996'

'highly similar to ( 563) AT1G52630 | Symbols: | unknown protein | chr1:19606470-19607848 REVERSEhighly similar to ( 709) loc\_os08g42550 12008.m080223 protein AP2 domain containing protein, expressed seq=cds; coord=1:195775782..195780071:1; parent\_gene=GRMZM2G080565'

'weakly similar to ( 135) AT2G47700 | Symbols: | zinc finger (C3HC4-type RING finger) family protein | chr2:19552506-19554351 REVERSEhighly similar to ( 583) loc\_os08g42640 12008.m08242 protein VIP2 protein, putative, expressed seq=cds; coord=1:196203304..196214408:1; parent\_gene=GRMZM2G053027'



'highly similar to ( 884) AT1G09890 | Symbols: | lyase | chr1:3214237-3217386 REVERSEnearly identical (1221) loc\_os08g44020 12008.m080048 protein lyase, putative, expressed seq=cds; coord=1:206155710..206160274:-1; parent\_gene=GRMZM2G154124'

'weakly similar to ( 184) AT2G17730 | Symbols: | zinc finger (C3HC4-type RING finger) family protein | chr2:7704142-7705312 FORWARDmoderately similar to ( 257) loc\_os08g43670 12008.m08341 protein RING-H2 finger protein ATL2B, putative, expressed seq=cds; coord=1:206463126..206464716:1; parent\_gene=GRMZM2G112617'

'moderately similar to ( 328) AT4G38660 | Symbols: | thaumatin, putative | chr4:18066448-18067792 REVERSEmoderately similar to ( 258) TLP1\_PRUPE Thaumatin-like protein 1 precursor (PpAZ44) - Prunus persica (Peach)moderately similar to ( 438) loc\_os08g43510 12008.m08325 protein thaumatin-like protein 1 precursor, putative, expressed seq=cds; coord=1:207035573..207037892:-1; parent\_gene=GRMZM2G049057'

'weakly similar to ( 101) AT5G20630 | Symbols: GLP3, GLP3A, GLP3B, ATGER3, GER3 | GER3 (GERMIN 3); oxalate oxidase | chr5:6975315-6975950 REVERSEweakly similar to ( 103) GLP1\_SINAL Germin-like protein 1 precursor - Sinapis alba (White mustard) (Brassica hirta)weakly similar to ( 114) loc\_os08g35750 12008.m07564 protein germin-like protein 1 precursor, putative, expressed seq=cds; coord=1:207865153..207865778:-1; parent\_gene=GRMZM2G363004'

'very weakly similar to (82.8) AT3G14200 | Symbols: | DNAJ heat shock N-terminal domain-containing protein | chr3:4712881-4714361 REVERSEweakly similar to ( 136) loc\_os08g35160 12008.m26703 protein chaperone protein dnaJ, putative, expressed seq=cds; coord=1:209125639..209127498:-1; parent\_gene=GRMZM2G059502'

'weakly similar to ( 122) AT5G17520 | Symbols: RCP1, MEX1 | RCP1 (ROOT CAP 1); maltose transmembrane transporter | chr5:5772796-5775231 REVERSEweakly similar to ( 155) MEX1\_ORYSA Maltose excess protein 1-like, chloroplast precursor - Oryza sativa (Rice)weakly similar to ( 155) loc\_os04g51330 12004.m10029 protein maltose excess protein 1-like, chloroplast precursor, putative, expressed seq=cds; coord=1:209220135..209222754:1; parent\_gene=GRMZM2G053037'

'weakly similar to ( 130) AT5G66590 | Symbols: | allergen V5/Tpx-1-related family protein | chr5:26574255-26574812 FORWARDweakly similar to ( 131) ST14\_SOLTU STS14 protein precursor - Solanum tuberosum (Potato)weakly similar to ( 124) loc\_os03g52300 12003.m10207 protein conserved hypothetical protein seq=cds; coord=1:273298297..273299437:-1; parent\_gene=GRMZM2G481194'

'weakly similar to ( 130) AT5G66590 | Symbols: | allergen V5/Tpx-1-related family protein | chr5:26574255-26574812 FORWARDweakly similar to ( 131) ST14\_SOLTU STS14 protein precursor - Solanum tuberosum (Potato)weakly similar to ( 124) loc\_os03g52300 12003.m10207 protein conserved hypothetical protein seq=cds; coord=1:273298297..273299437:-1; parent\_gene=GRMZM2G481194'

'highly similar to ( 816) AT5G15810 | Symbols: | N2,N2-dimethylguanosine tRNA methyltransferase family protein | chr5:5157798-5161121 FORWARDhighly similar to ( 897) loc\_os03g57280 12003.m10646 protein N-dimethylguanosine tRNA methyltransferase, putative, expressed seq=cds; coord=1:290957733..290965627:-1; parent\_gene=GRMZM2G077079'

'highly similar to ( 832) AT4G30560 | Symbols: ATCNGC9, CNGC9 | ATCNGC9 (CYCLIC NUCLEOTIDE GATED CHANNEL 9); calmodulin binding / cyclic nucleotide binding / ion channel | chr4:14926974-14929681 REVERSEnearly identical (1168) loc\_os04g55080 12004.m10400 protein cyclic nucleotide-gated ion channel 9, putative, expressed seq=cds; coord=2:6019299..6030234:-1; parent\_gene=GRMZM2G023037'

'moderately similar to ( 207) AT5G23230 | Symbols: NIC2 | NIC2 (NICOTINAMIDASE 2); catalytic/ nicotinamidase | chr5:7826005-7826601 REVERSEmoderately similar to ( 330) loc\_os04g44420 12004.m09401 protein isochorismatase, putative, expressed seq=cds; coord=2:26875237..26876162:1; parent\_gene=GRMZM2G362413'

'moderately similar to ( 204) AT3G59110 | Symbols: | protein kinase family protein | chr3:21855673-21857847 FORWARDweakly similar to ( 199) NORK\_PEA Nodulation receptor kinase precursor (EC 2.7.11.1) - Pisum sativum (Garden pea)highly similar to ( 586) loc\_os04g39180 12004.m08907 protein nodulation receptor kinase precursor, putative, expressed seq=cds; coord=2:40493826..40495596:1; parent\_gene=GRMZM2G179268'

'moderately similar to ( 207) AT2G16250 | Symbols: | leucine-rich repeat transmembrane protein kinase, putative | chr2:7039682-7042933 REVERSEweakly similar to ( 106) PSKR\_DAUCA Phytosulfokine receptor precursor (EC 2.7.11.1) (Phytosulfokine LRR receptor kinase) - Daucus carota (Carrot)moderately similar to ( 303) loc\_os03g51440 12003.m10123 protein ATP binding protein, putative, expressed seq=cds; coord=2:104961688..104969752:1; parent\_gene=GRMZM2G463227'

'moderately similar to ( 236) AT4G23900 | Symbols: | nucleoside diphosphate kinase 4 (NDK4) | chr4:12424505-12426318 FORWARDmoderately similar to ( 231) NDK4\_SPIOL Nucleoside diphosphate kinase 4, chloroplast precursor (EC 2.7.4.6) (Nucleoside diphosphate kinase IV) (NDK IV) (NDP kinase IV) (NDPK IV) (Nucleoside diphosphate kinase III) - Spinacia oleracea (Spinach)moderately similar to ( 238) loc\_os05g51700 12005.m083838 protein nucleoside diphosphate kinase 4, chloroplast precursor, putative, expressed seq=cds; coord=2:128936549..128937471:1; parent\_gene=GRMZM2G001524'

'moderately similar to ( 211) AT1G21640 | Symbols: NADK2, ATNADK2 | NADK2; NAD

'weakly similar to ( 110) AT1G71860 | Symbols: PTP1, ATP1P1 | PTP1 (PROTEIN TYROSINE PHOSPHATASE 1); protein tyrosine phosphatase | chr1:27026866-27028675 FORWARDweakly similar to ( 172) loc\_os12g07590 12012.m073780 protein receptor-type tyrosine-protein phosphatase S precursor, putative, expressed seq=cds; coord=2:132080689..132083859:1; parent\_gene=GRMZM2G416491'

'weakly similar to ( 145) AT2G36090 | Symbols: | F-box family protein | chr2:15158631-15159584 FORWARDmoderately similar to ( 330) loc\_os11g05660 12011.m04763 protein F-box domain containing protein, expressed seq=cds; coord=2:143043779..143045537:1; parent\_gene=GRMZM2G348855'

'moderately similar to ( 382) AT1G35910 | Symbols: | trehalose-6-phosphate phosphatase, putative | chr1:13363200-13364965 REVERSEmoderately similar to ( 413) loc\_os07g43160 12007.m08544 protein expressed protein seq=cds; coord=2:212477947..212480732:1; parent\_gene=GRMZM2G117564'

'moderately similar to ( 448) AT5G48910 | Symbols: | pentatricopeptide (PPR) repeat-containing protein | chr5:19832969-19834909 REVERSEvery weakly similar to (80.5) RF1\_ORYSA Rf1 protein, mitochondrial precursor (PPR protein) (Fertility restorer) (Restorer for CMS) - Oryza sativa (Rice)moderately similar to ( 438) loc\_os01g51790 12001.m11356 protein selenium-binding protein-like, putative seq=cds; coord=2:213162946..213164673:1; parent\_gene=GRMZM2G703373'

'weakly similar to ( 124) AT5G37820 | Symbols: NIP4;2, NLM5 | NIP4;2 (NOD26-LIKE INTRINSIC PROTEIN 4;2); water channel | chr5:15050261-15051542 FORWARDweakly similar to ( 104) NO26\_SOYBN Nodulin-26 (N-26) - Glycine max (Soybean)moderately similar to ( 286) loc\_os01g02190 12001.m06861 protein aquaporin NIP1.1, putative, expressed seq=cds; coord=3:28230487..28232296:1; parent\_gene=GRMZM2G103214'

'moderately similar to ( 490) AT1G53300 | Symbols: TTL1 | TTL1 (TETRATRICOPETIDE-REPEAT THIOREDOXIN LIKE 1); binding | chr1:19879726-19882375 FORWARDhighly similar to ( 828) loc\_os01g42960 12001.m10559 protein electron transporter, putative, expressed seq=cds; coord=3:225545980..225550303:1; parent\_gene=GRMZM2G093436'

'moderately similar to ( 490) AT1G53300 | Symbols: TTL1 | TTL1 (TETRATRICOPETIDE-REPEAT THIOREDOXIN LIKE 1); binding | chr1:19879726-19882375 FORWARDhighly similar to ( 828) loc\_os01g42960 12001.m10559 protein electron transporter, putative, expressed seq=cds; coord=3:225545980..225550303:1; parent\_gene=GRMZM2G093436'

'moderately similar to ( 266) AT5G53970 | Symbols: | aminotransferase, putative | chr5:21910676-21912594 FORWARDhighly similar to ( 597) loc\_os11g42510 12011.m28857 protein tyrosine aminotransferase, putative, expressed seq=cds; coord=4:3888587..3891491:1; parent\_gene=GRMZM2G006480'

'very weakly similar to (99.0) AT4G12600 | Symbols: | ribosomal protein L7Ae/L30e/S12e/Gadd45 family protein | chr4:7453296-7454208 FORWARDweakly similar to ( 102) loc\_os03g13800 12003.m06824 protein NHP2-like protein 1, putative, expressed seq=cds; coord=4:4706034..4706834:-1; parent\_gene=GRMZM2G089830'

'very weakly similar to (99.0) AT4G12600 | Symbols: | ribosomal protein L7Ae/L30e/S12e/Gadd45 family protein | chr4:7453296-7454208 FORWARDweakly similar to ( 102) loc\_os03g13800 12003.m06824 protein NHP2-like protein 1, putative, expressed seq=cds; coord=4:4706034..4706834:-1; parent\_gene=GRMZM2G089830'

'weakly similar to ( 170) AT2G45850 | Symbols: | DNA-binding family protein | chr2:18871901-18873457 REVERSEmoderately similar to ( 430) loc\_os02g57820 12002.m10803 protein DNA binding protein, putative, expressed seq=cds; coord=4:169553785..169558577:1; parent\_gene=GRMZM2G123887'

'moderately similar to ( 481) AT2G03220 | Symbols: FT1, ATFUT1, ATFT1, MUR2 | FT1 (FUCOSYLTRANSFERASE 1); fucosyltransferase/ transferase, transferring glycosyl groups | chr2:970401-972353 REVERSEmoderately similar to ( 473) FUT1\_PEA Galactoside 2-alpha-L-fucosyltransferase (EC 2.4.1.69) (Xyloglucan alpha-(1,2)-fucosyltransferase) (PsFT1) - Pisum sativum (Garden pea)highly similar to ( 840) loc\_os02g52560 12002.m10287 protein galactoside 2-alpha-L-fucosyltransferase, putative, expressed seq=cds; coord=4:178671950..178675419:1; parent\_gene=GRMZM2G015983'

'moderately similar to ( 481) AT2G03220 | Symbols: FT1, ATFUT1, ATFT1, MUR2 | FT1 (FUCOSYLTRANSFERASE 1); fucosyltransferase/ transferase, transferring glycosyl groups | chr2:970401-972353 REVERSEmoderately similar to ( 473) FUT1\_PEA Galactoside 2-alpha-L-fucosyltransferase (EC 2.4.1.69) (Xyloglucan alpha-(1,2)-fucosyltransferase) (PsFT1) - Pisum sativum (Garden pea)highly similar to ( 840) loc\_os02g52560 12002.m10287 protein galactoside 2-alpha-L-fucosyltransferase, putative, expressed seq=cds; coord=4:178671950..178675419:1; parent\_gene=GRMZM2G015983'

'moderately similar to ( 400) AT4G39770 | Symbols: | trehalose-6-phosphate phosphatase, putative | chr4:18449138-18451218 REVERSEhighly similar to ( 531) loc\_os02g51680 12002.m10199 protein expressed protein seq=cds; coord=4:180885525..180885567:-1; parent\_gene=GRMZM2G151044'

'highly similar to ( 555) AT5G09360 | Symbols: LAC14 | LAC14 (laccase 14); laccase | chr5:2906426-2908658 REVERSEmoderately similar to ( 207) ASO\_CUCMA L-ascorbate oxidase precursor (EC 1.10.3.3) (Ascorbase) (ASO) - Cucurbita maxima (Pumpkin) (Winter squash)highly similar to ( 750) loc\_os02g51440 12002.m10178 protein laccase, putative seq=cds; coord=4:181527348..181530838:1; parent\_gene=GRMZM2G169033'

'nearly identical (1029) AT2G37050 | Symbols: | kinase | chr2:15569290-15573477 FORWARDmoderately similar to ( 377) NORL\_PEA Nodulation receptor kinase precursor (EC 2.7.11.1) - Pisum sativum (Garden pea)nearly identical (1427) loc\_os11g01200 12011.m079924 protein transposon protein, putative, unclassified, expressed seq=cds; coord=4:183207728..183213465:1; parent\_gene=GRMZM2G091632'

'moderately similar to ( 283) AT2G40300 | Symbols: ATFER4 | ATFER4 (ferritin 4); binding / ferric iron binding / oxidoreductase/ transition metal ion binding | chr2:16831501-16833214 REVERSEmoderately similar to ( 402) FRI1\_MAIZE Ferritin-1, chloroplast precursor (EC 1.16.3.1) (ZmFer1) - Zea mays (Maize)moderately similar to ( 351) loc\_os12g01530 12012.m26727 protein ferritin-1, chloroplast precursor, putative, expressed seq=cds; coord=4:183588190..183591209:-1; parent\_gene=GRMZM2G325575'

'moderately similar to ( 400) AT5G05340 | Symbols: | peroxidase, putative | chr5:1579142-1580819 REVERSEmoderately similar to ( 385) PERP7\_BRARA Peroxidase P7 (EC 1.11.1.7) (TP7) - Brassica rapa (Turnip)highly similar to ( 524) loc\_os11g02130 12011.m04413 protein peroxidase 52 precursor, putative, expressed seq=cds; coord=4:183941776..183944103:1; parent\_gene=AC197758.3\_FG004'

'very weakly similar to (94.0) AT5G40190 | Symbols: | calmodulin-binding protein | chr5:16069298-16069849 REVERSEweakly similar to ( 174) loc\_os09g20860 12009.m05293 protein calmodulin binding protein, putative, expressed seq=cds; coord=4:224779693..224780609:-1; parent\_gene=GRMZM2G085022'

'moderately similar to ( 307) AT5G45775 | Symbols: | 60S ribosomal protein L11 (RPL11D) | chr5:18565281-18566496 REVERSEmoderately similar to ( 314) RL11\_ORYSA 60S ribosomal protein L11 - Oryza sativa (Rice)moderately similar to ( 317) loc\_os02g14059 12002.m77785 protein 60S ribosomal protein L11-1, putative, expressed seq=cds; coord=4:228642879..228646247:1; parent\_gene=GRMZM2G018770'

'weakly similar to ( 192) AT1G32150 | Symbols: | bZIP transcription factor family protein | chr1:11566022-11568317 FORWARDmoderately similar to ( 351) HBP1A\_WHEAT Transcription factor HBP-1a (Histone-specific transcription factor HBP1) - Triticum aestivum (Wheat)moderately similar to ( 369) loc\_os02g03580 12002.m77766 protein transcription factor HBP-1a, putative, expressed seq=cds; coord=4:238990853..238994795:1; parent\_gene=GRMZM2G019106'

'moderately similar to ( 298) AT3G02100 | Symbols: | UDP-glucuronosyl/UDP-glucosyl transferase family protein | chr3:368840-370484 REVERSEweakly similar to ( 155) IAAG\_MAIZE Indole-3-acetate beta-glucosyltransferase (EC 2.4.1.121) (IAA-Glu synthetase) ((Uridine 5'-diphosphate-glucose:indol-3-ylacetyl)-beta-D-glucosyl transferase) - Zea mays (Maize)highly similar to ( 532) loc\_os03g55030 12003.m35419 protein glucosyl transferase, putative, expressed seq=cds; coord=5:6776441..6778115:1; parent\_gene=GRMZM2G030821'

'highly similar to ( 855) AT5G39040 | Symbols: ATTAP2, TAP2 | ATTAP2; ATPase, coupled to transmembrane movement of substances / transporter | chr5:15625660-15629621 FORWARDmoderately similar to ( 316) MDR\_ORYSA Putative multidrug resistance protein (P-glycoprotein) - Oryza sativa (Rice)nearly identical (1053) loc\_os03g54790 12003.m10395 protein ATP-binding cassette sub-family B member 10, mitochondrial precursor, putative, expressed seq=cds; coord=5:6877441..6883253:-1; parent\_gene=GRMZM2G072071'

'moderately similar to ( 375) AT3G22750 | Symbols: | protein kinase, putative | chr3:8037364-8039096 REVERSEhighly similar to ( 538) loc\_os03g53410 12003.m10311 protein ATM1K1, putative, expressed seq=cds; coord=5:7587329..7589198:-1; parent\_gene=GRMZM2G014618'

'highly similar to ( 677) AT1G58520 | Symbols: RXW8 | hydrolase, acting on ester bonds / lipase | chr1:2172913-21731344 FORWARDnearly identical (1130) loc\_os03g51620 12003.m10140 protein RXW8, putative, expressed seq=cds; coord=5:9372046..9377144:1; parent\_gene=GRMZM2G164470'

'moderately similar to ( 231) AT1G17950 | Symbols: ATMYB52, BW52, MYB52 | MYB52 (MYB DOMAIN PROTEIN 52); DNA binding / transcription factor | chr1:6177764-6179063 FORWARDweakly similar to ( 102) MYBC\_MAIZE Anthocyanin regulatory C1 protein - Zea mays (Maize)moderately similar to ( 355) loc\_os03g51110 12003.m10092 protein MYB52, putative, expressed seq=cds; coord=5:10172933..10174782:1; parent\_gene=GRMZM2G455869'

'moderately similar to ( 231) AT1G17950 | Symbols: ATMYB52, BW52, MYB52 | MYB52 (MYB DOMAIN PROTEIN 52); DNA binding / transcription factor | chr1:6177764-6179063 FORWARDweakly similar to ( 102) MYBC\_MAIZE Anthocyanin regulatory C1 protein - Zea mays (Maize)moderately similar to ( 355) loc\_os03g51110 12003.m10092 protein MYB52, putative, expressed seq=cds; coord=5:10172933..10174782:1; parent\_gene=GRMZM2G455869'

'moderately similar to ( 231) AT1G17950 | Symbols: ATMYB52, BW52, MYB52 | MYB52 (MYB DOMAIN PROTEIN 52); DNA binding / transcription factor | chr1:6177764-6179063 FORWARDweakly similar to ( 102) MYBC\_MAIZE Anthocyanin regulatory C1 protein - Zea mays (Maize)moderately similar to ( 355) loc\_os03g51110 12003.m10092 protein MYB52, putative, expressed seq=cds; coord=5:10172933..10174782:1; parent\_gene=GRMZM2G455869'

'very weakly similar to (84.7) AT3G61610 | Symbols: | aldose 1-epimerase family protein | chr3:22799480-22801029 FORWARDweakly similar to ( 103) loc\_os05g49430 12005.m09013 protein apospory-associated protein C, putative, expressed seq=cds; coord=6:165349659..165351490:1; parent\_gene=GRMZM2G011662'

'moderately similar to ( 298) AT2G42990 | Symbols: | GDSL-motif lipase/hydrolase family protein | chr2:17879056-17880200 FORWARDweakly similar to ( 184) APG\_BRANA Anter-specific proline-rich protein APG (Protein CEX) (Fragment) - Brassica napus (Rape)moderately similar to ( 480) loc\_os09g04710 12009.m21966 protein anther-specific proline-rich protein APG precursor, putative, expressed seq=cds; coord=7:68344363..68349450:-1; parent\_gene=GRMZM2G088919'

'weakly similar to ( 197) AT5G50850 | Symbols: MAB1 | MAB1 (MACCI-BOU); catalytic/ pyruvate dehydrogenase (acetyl-transferring) | chr5:20689671-20692976 FORWARDmoderately similar to ( 206) ODPB\_PEA Pyruvate dehydrogenase E1 component subunit beta, mitochondrial precursor (EC 1.2.4.1) (PDHE1-B) - Pisum sativum (Garden pea)moderately similar to ( 229) loc\_os09g33500 12009.m22013 protein pyruvate dehydrogenase E1 component subunit beta, mitochondrial precursor, putative, expressed seq=cds; coord=7:135836369..135839558:-1; parent\_gene=GRMZM2G128121'

'moderately similar to ( 304) AT2G05840 | Symbols: PAA2 | PAA2 (20S PROTEASOME SUBUNIT PAA2); endopeptidase/ peptidase/ threonine-type endopeptidase | chr2:2234226-2235973 FORWARDmoderately similar to ( 314) PSA6\_TOBAC Proteasome subunit alpha type 6 (EC 3.4.25.1) (20S proteasome alpha subunit A) (20S proteasome subunit alpha-1) - Nicotiana tabacum (Common tobacco)moderately similar to ( 306) loc\_os03g08280 12003.m101213 protein proteasome subunit alpha type 6, putative, expressed seq=cds; coord=7:165345022..165349965:-1; parent\_gene=GRMZM2G080549'

'very weakly similar to (99.8) AT1G30210 | Symbols: TCP24 | TCP24 (TEOSINTE BRANCHED1, CYCLOIDEA, AND PCF FAMILY 24); transcription factor | chr1:10628754-10629728 REVERSEmoderately similar to ( 239) loc\_os12g42190 12012.m07998 protein transposon protein, putative, unclassified, expressed seq=cds; coord=7:168217960..168219041:-1; parent\_gene=GRMZM2G180568'

'very weakly similar to (99.8) AT1G30210 | Symbols: TCP24 | TCP24 (TEOSINTE BRANCHED1, CYCLOIDEA, AND PCF FAMILY 24); transcription factor | chr1:10628754-10629728 REVERSEmoderately similar to ( 239) loc\_os12g42190 12012.m07998 protein transposon protein, putative, unclassified, expressed seq=cds; coord=7:168217960..168219041:-1; parent\_gene=GRMZM2G180568'

'very weakly similar to (99.8) AT1G30210 | Symbols: TCP24 | TCP24 (TEOSINTE BRANCHED1, CYCLOIDEA, AND PCF FAMILY 24); transcription factor | chr1:10628754-10629728 REVERSEmoderately similar to ( 239) loc\_os12g42190 12012.m07998 protein transposon protein, putative, unclassified, expressed seq=cds; coord=7:168217960..168219041:-1; parent\_gene=GRMZM2G180568'

'highly similar to ( 528) AT5G66190 | Symbols: ATLFNR1 | FNR1 (FERREDOXIN-NADP(

'highly similar to ( 912) AT4G33650 | Symbols: ADL2, DRP3A | DRP3A (DYNAMIN-RELATED PROTEIN 3A); GTP binding / GTPase/ phosphoinositide binding | chr4:16161073-16166587 FORWARDnearly identical (1281) loc\_os01g69130 12001.m150447 protein dynamin-related protein 3A, putative, expressed seq=cds; coord=8:161744495..161753951:1; parent\_gene=GRMZM2G180335'

'weakly similar to ( 198) AT3G12600 | Symbols: atnudt16 | atnudt16 (Arabidopsis thaliana Nudix hydrolase homolog 16); hydrolase | chr3:4004676-4005995 FORWARDmoderately similar to ( 248) loc\_os04g53380 12004.m10229 protein expressed protein seq=cds; coord=8:161926660..161930458:1; parent\_gene=GRMZM2G013060'

'very weakly similar to (82.8) loc\_os01g06320 12001.m07262 protein myb-like DNA-binding domain, SHAQKYF class family protein, expressed seq=cds; coord=8:162230463..162234568:-1; parent\_gene=GRMZM2G107504'

'weakly similar to ( 130) loc\_os05g05650 12005.m05092 protein SRC2, putative, expressed seq=cds; coord=10:90044647..90045538:1; parent\_gene=GRMZM2G367330'

'moderately similar to ( 412) AT3G59950 | Symbols: | autophagy 4b (APG4b) | chr3:22145559-22146629 REVERSEhighly similar to ( 671) loc\_os04g58560 12004.m79009 protein cysteine protease ATG4B, putative, expressed seq=cds; coord=10:148530254..148533742:-1; parent\_gene=GRMZM2G173682'

'moderately similar to ( 412) AT3G59950 | Symbols: | autophagy 4b (APG4b) | chr3:22145559-22146629 REVERSEhighly similar to ( 671) loc\_os04g58560 12004.m79009 protein cysteine protease ATG4B, putative, expressed seq=cds; coord=10:148530254..148533742:-1; parent\_gene=GRMZM2G173682'

'moderately similar to ( 358) AT1G60600 | Symbols: ABC4 | ABC4 (ABERRANT CHLOROPLAST DEVELOPMENT 4); 1,4-dihydroxy-2-naphthoate octaprenyltransferase/ prenyltransferase | chr1:22324807-22326759 REVERSEmoderately similar to ( 486) loc\_os03g09060 12003.m06412 protein 1,4-dihydroxy-2-naphthoate octaprenyltransferase, putative, expressed seq=cds; coord=1:19557389..19560305:1; parent\_gene=GRMZM2G097283'

'moderately similar to ( 358) AT1G60600 | Symbols: ABC4 | ABC4 (ABERRANT CHLOROPLAST DEVELOPMENT 4); 1,4-dihydroxy-2-naphthoate octaprenyltransferase/ prenyltransferase | chr1:22324807-22326759 REVERSEmoderately similar to ( 486) loc\_os03g09060 12003.m06412 protein 1,4-dihydroxy-2-naphthoate octaprenyltransferase, putative, expressed seq=cds; coord=1:19557389..19560305:1; parent\_gene=GRMZM2G097283'

'moderately similar to ( 416) AT5G64970 | Symbols: | mitochondrial substrate carrier family protein | chr5:25958806-25960443 REVERSEweakly similar to ( 124) BT1\_MAIZE Protein brittle-1, chloroplast precursor - Zea mays (Maize)moderately similar to ( 480) loc\_os03g09110 12003.m06417 protein protein brittle-1, chloroplast precursor, putative, expressed seq=cds; coord=1:19817412..19820448:-1; parent\_gene=GRMZM2G147481'

'moderately similar to ( 416) AT5G64970 | Symbols: | mitochondrial substrate carrier family protein | chr5:25958806-25960443 REVERSEweakly similar to ( 124) BT1\_MAIZE Protein brittle-1, chloroplast precursor - Zea mays (Maize)moderately similar to ( 480) loc\_os03g09110 12003.m06417 protein protein brittle-1, chloroplast precursor, putative, expressed seq=cds; coord=1:19817412..19820448:-1; parent\_gene=GRMZM2G147481'

'moderately similar to ( 384) AT3G11180 | Symbols: | oxidoreductase, 2OG-Fe(II) oxygenase family protein | chr3:3504249-3506688 FORWARDmoderately similar to ( 204) LDOX\_MALDO Leucoanthocyanidin dioxygenase (EC 1.14.11.19) (LDOX) (Leucocyanidin oxygenase) (Leucoanthocyanidin hydroxylase) (Anthocyanidin synthase) - Malus domestica (Apple) (Malus sylvestris)highly similar to ( 520) loc\_os03g18030 12003.m101308 protein leucoanthocyanidin dioxygenase, putative, expressed seq=cds; coord=1:44955003..44960551:-1; parent\_gene=AC212219.3\_FG005'

'weakly similar to ( 126) AT3G05870 | Symbols: APC11 | APC11; protein binding / ubiquitin-protein ligase/ zinc ion binding | chr3:1754463-1754802 FORWARDweakly similar to ( 197) loc\_os03g19059 12003.m101651 protein anaphase-promoting complex subunit 11, putative, expressed seq=cds; coord=1:47900337..47901226:1; parent\_gene=GRMZM2G162356'

'moderately similar to ( 202) AT5G52840 | Symbols: | NADH-ubiquinone oxidoreductase-related | chr5:21413718-21414794 FORWARDmoderately similar to ( 260) loc\_os03g19890 12003.m07402 protein NADH-ubiquinone oxidoreductase 13 kDa-B subunit, putative, expressed seq=cds; coord=1:51013925..51015964:1; parent\_gene=GRMZM2G018941'

'moderately similar to ( 219) AT2G40620 | Symbols: | bZIP transcription factor family protein | chr2:16954804-16956872 REVERSEmoderately similar to ( 323) RF2B\_ORYSA Transcription factor RF2b - Oryza sativa (Rice)moderately similar to ( 324) loc\_os03g21800 12003.m101333 protein transcription factor RF2b, putative, expressed seq=cds; coord=1:56215993..56221441:1; parent\_gene=GRMZM2G062391'

'very weakly similar to (83.6) loc\_os04g42580 12004.m09225 protein carboxyvinyl-carboxyphosphonate phosphorylmutase, putative, expressed seq=cds; coord=1:156159993..156161051:-1; parent\_gene=AC210816.3\_FG007'

'moderately similar to ( 201) AT4G15417 | Symbols: ATRTL1 | ATRTL1 (ARABIDOPSIS THALIANA RNASEIII-LIKE 1); RNA binding / ribonuclease III | chr4:8821759-8822991 FORWARDmoderately similar to ( 410) loc\_os06g25250 12006.m07173 protein endoribonuclease Dicer, putative, expressed seq=cds; coord=1:220775956..220779312:1; parent\_gene=GRMZM2G101105'

'moderately similar to ( 347) AT2G46620 | Symbols: | AAA-type ATPase family protein | chr2:19139071-19140546 REVERSEhighly similar to ( 650) loc\_os10g37500 12010.m06538 protein ATP binding protein, putative, expressed seq=cds; coord=1:222980062..222981812:1; parent\_gene=GRMZM2G170982'

'highly similar to ( 580) AT3G63240 | Symbols: | endonuclease/exonuclease/phosphatase family protein | chr3:23364411-23366876 REVERSEhighly similar to ( 866) loc\_os10g28660 12010.m05745 protein type I inositol-1,4,5-trisphosphate 5-phosphatase CVP2, putative, expressed seq=cds; coord=1:240379493..240383889:1; parent\_gene=GRMZM2G017237'

'weakly similar to ( 179) loc\_os04g56680 12004.m10555 protein OsSAUR22 - Auxin-responsive SAUR gene family member, expressed seq=cds; coord=2:3597793..3599010:1; parent\_gene=GRMZM2G365162'

'weakly similar to ( 179) loc\_os04g56680 12004.m10555 protein OsSAUR22 - Auxin-responsive SAUR gene family member, expressed seq=cds; coord=2:3597793..3599010:1; parent\_gene=GRMZM2G365162'

'highly similar to ( 571) AT4G27650 | Symbols: PEL1 | PEL1 (PELOTA); translation release factor | chr4:13803459-13807556 REVERSEhighly similar to ( 660) loc\_os04g56480 12004.m101682 protein protein pelota, putative, expressed seq=cds; coord=2:3923303..3934103:-1; parent\_gene=GRMZM2G044011'



'moderately similar to ( 294) AT1G73110 | Symbols: | ribulose biphosphate carboxylase/oxygenase activase, putative / RuBisCO activase, putative | chr1:27494344-27496844 REVERSEmoderately similar to ( 202) RCA\_MAIZE Ribulose biphosphate carboxylase/oxygenase activase, chloroplast precursor (RuBisCO activase) (RA) - Zea mays (Maize)moderately similar to ( 344) loc\_os04g56320 12004.m10522 protein ribulose biphosphate carboxylase/oxygenase activase, chloroplast precursor, putative, expressed seq=cds; coord=2:4159971..4163217:1; parent\_gene=GRMZM2G039345'

'weakly similar to ( 179) AT5G57330 | Symbols: | aldose 1-epimerase family protein | chr5:23218392-23220664 FORWARDmoderately similar to ( 216) loc\_os04g56290 12004.m35496 protein apospory-associated protein C, putative, expressed seq=cds; coord=2:4174781..4178923:-1; parent\_gene=GRMZM2G039588'

'moderately similar to ( 268) AT4G36920 | Symbols: AP2, FLO2, FL1 | AP2 (APETALA 2); transcription factor | chr4:17400998-17403140 FORWARDweakly similar to ( 130) BBM2\_BRANA Protein BABY BOOM 2 (BnBBM2) - Brassica napus (Rape)moderately similar to ( 382) loc\_os04g55560 12004.m35488 protein AP2 domain containing protein, expressed seq=cds; coord=2:5514479..5518846:-1; parent\_gene=GRMZM2G174784'

'weakly similar to ( 113) AT2G46680 | Symbols: ATHB-7, ATHB7 | ATHB-7 (ARABIDOPSIS THALIANA HOMEBOX 7); transcription activator/ transcription factor | chr2:19165777-19166773 REVERSEmoderately similar to ( 246) loc\_os04g45810 12004.m09532 protein homeodomain-leucine zipper transcription factor TaHDZip1-1, putative, expressed seq=cds; coord=2:21596800..21598107:1; parent\_gene=GRMZM2G351330'

'weakly similar to ( 140) AT5G66320 | Symbols: | zinc finger (GATA type) family protein | chr5:26496208-26497309 REVERSEweakly similar to ( 187) loc\_os04g45650 12004.m35556 protein expressed protein seq=cds; coord=2:22069136..22071156:-1; parent\_gene=GRMZM2G404973'

'moderately similar to ( 201) AT4G37925 | Symbols: NDH-M | NDH-M (subunit NDH-M of NAD(P)H:plastoquinone dehydrogenase complex) | chr4:17830748-17831485 REVERSEmoderately similar to ( 273) loc\_os04g45600 12004.m09513 protein expressed protein seq=cds; coord=2:22192252..22193718:-1; parent\_gene=GRMZM2G109244'

'moderately similar to ( 201) AT4G37925 | Symbols: NDH-M | NDH-M (subunit NDH-M of NAD(P)H:plastoquinone dehydrogenase complex) | chr4:17830748-17831485 REVERSEmoderately similar to ( 273) loc\_os04g45600 12004.m09513 protein expressed protein seq=cds; coord=2:22192252..22193718:-1; parent\_gene=GRMZM2G109244'

'moderately similar to ( 294) AT3G02070 | Symbols: | OTU-like cysteine protease family protein | chr3:361368-363132 FORWARDmoderately similar to ( 361) loc\_os04g32970 12004.m08394 protein cysteine-type peptidase, putative, expressed seq=cds; coord=2:61323307..61328436:-1; parent\_gene=GRMZM2G122239'

'moderately similar to ( 432) AT4G34220 | Symbols: | leucine-rich repeat transmembrane protein kinase, putative | chr4:16381653-16384054 REVERSEweakly similar to ( 112) PSKR\_DAUCA Phytosulfokine receptor precursor (EC 2.7.11.1) (Phytosulfokine LRR receptor kinase) - Daucus carota (Carrot)highly similar to ( 897) loc\_os09g02250 12009.m059931 protein transposon protein, putative, unclassified, expressed seq=cds; coord=2:163676823..163680091:1; parent\_gene=GRMZM2G163724'

'moderately similar to ( 327) AT1G68090 | Symbols: ANNAT5, ANN5 | ANN5; calcium ion binding / calcium-dependent phospholipid binding | chr1:25519442-25520774 REVERSEmoderately similar to ( 209) ANX4\_FRAAN Annexin-like protein RJ4 - Fragaria ananassa (Strawberry)highly similar to ( 572) loc\_os09g23160 12009.m059972 protein annexin A4, putative, expressed seq=cds; coord=2:178875051..178880178:1; parent\_gene=GRMZM2G009136'

'moderately similar to ( 434) AT3G20810 | Symbols: | transcription factor jumonji (jnjC) domain-containing protein | chr3:7275814-7278182 FORWARDhighly similar to ( 523) loc\_os09g31380 12009.m06252 protein conserved hypothetical protein seq=cds; coord=2:189777176..189782078:1; parent\_gene=GRMZM2G052908'

'weakly similar to ( 122) loc\_os09g32430 12009.m06331 protein oxidoreductase, putative, expressed seq=cds; coord=2:191156336..191157580:-1; parent\_gene=GRMZM2G087312'

'highly similar to ( 545) AT4G28880 | Symbols: ckl3 | ckl3 (Casein Kinase I-like 3); ATP binding / kinase/ protein kinase/ protein serine/threonine kinase | chr4:14251351-14254048 FORWARDhighly similar to ( 683) loc\_os01g13060 12001.m150523 protein casein kinase I isoform delta-like, putative, expressed seq=cds; coord=3:1885669..1901782:-1; parent\_gene=GRMZM2G156035'

'highly similar to ( 545) AT4G28880 | Symbols: ckl3 | ckl3 (Casein Kinase I-like 3); ATP binding / kinase/ protein kinase/ protein serine/threonine kinase | chr4:14251351-14254048 FORWARDhighly similar to ( 683) loc\_os01g13060 12001.m150523 protein casein kinase I isoform delta-like, putative, expressed seq=cds; coord=3:1885669..1901782:-1; parent\_gene=GRMZM2G156035'

'highly similar to ( 545) AT4G28880 | Symbols: ckl3 | ckl3 (Casein Kinase I-like 3); ATP binding / kinase/ protein kinase/ protein serine/threonine kinase | chr4:14251351-14254048 FORWARDhighly similar to ( 683) loc\_os01g13060 12001.m150523 protein casein kinase I isoform delta-like, putative, expressed seq=cds; coord=3:1885669..1901782:-1; parent\_gene=GRMZM2G156035'

'weakly similar to ( 112) loc\_os01g10470 12001.m07668 protein RALF precursor, putative, expressed seq=cds; coord=3:4752687..4753608:-1; parent\_gene=GRMZM2G357124'

'very weakly similar to (84.3) AT2G16120 | Symbols: | mannitol transporter, putative | chr2:6996727-6998441 REVERSEweakly similar to ( 146) loc\_os11g41840 12011.m08022 protein arabinose-proton symporter, putative seq=cds; coord=3:10319432..10322897:-1; parent\_gene=GRMZM2G429964'

'highly similar to ( 822) AT1G15460 | Symbols: ATBOR4, BOR4 | BOR4 (REQUIRES HIGH BORON 4); anion exchanger | chr1:5310196-5313376 REVERSEearly identical (1013) loc\_os01g08020 12001.m07427 protein boron transporter-like protein 2, putative, expressed seq=cds; coord=3:10934126..10940345:-1; parent\_gene=GRMZM2G051753'

'moderately similar to ( 468) AT1G06890 | Symbols: | transporter-related | chr1:2111728-2114038 REVERSEhighly similar to ( 557) loc\_os01g07310 12001.m43446 protein integral membrane protein like, putative, expressed seq=cds; coord=3:13589786..13593160:1; parent\_gene=GRMZM2G116053'

'moderately similar to ( 383) AT3G05840 | Symbols: ATSK12 | ATSK12; protein kinase/ protein serine/threonine kinase | chr3:1740793-1742927 FORWARDmoderately similar to ( 384) MSK3\_MEDSA Glycogen synthase kinase-3 homolog MsK-3 (EC 2.7.11.1) - Medicago sativa (Alfalfa)moderately similar to ( 410) loc\_os01g14860 12001.m43459 protein glycogen synthase kinase-3 homolog MsK-3, putative, expressed seq=cds; coord=3:13917982..13919834:-1; parent\_gene=GRMZM2G129482'

'moderately similar to ( 261) AT5G16450 | Symbols: | dimethylmenaquinone methyltransferase family protein | chr5:5374357-5375342 FORWARDmoderately similar to ( 306) loc\_os01g52460 12001.m11420 protein regulator of ribonuclease activity A, putative, expressed seq=cds; coord=3:17033772..17034278:1; parent\_gene=AC215260.3\_FG004'

'weakly similar to ( 182) AT3G49910 | Symbols: | 60S ribosomal protein L26 (RPL26A) | chr3:18504311-18504751 FORWARDweakly similar to ( 166) RL26\_BRARA 60S ribosomal protein L26 - Brassica rapa (Turnip)moderately similar to ( 208) loc\_os12g05430 12012.m04536 protein 60S ribosomal protein L26-1, putative, expressed seq=cds; coord=3:19669523..19670484:-1; parent\_gene=GRMZM2G327564'

'highly similar to ( 516) AT3G17510 | Symbols: CIPK1, SnRK3.16 | CIPK1 (CBL-INTERACTING PROTEIN KINASE 1); kinase/ protein binding | chr3:5989309-5992627 REVERSEmoderately similar to ( 389) CIPK1\_ORYSA CIPK-like protein 1 (EC 2.7.11.1) (OsCK1) - Oryza sativa (Rice)highly similar to ( 749) loc\_os01g18800 12001.m150556 protein CBL-interacting serine/threonine-protein kinase 1, putative, expressed seq=cds; coord=3:50604991..50610043:-1; parent\_gene=GRMZM2G170120'

'weakly similar to ( 116) AT3G21460 | Symbols: | electron carrier/ protein disulfide oxidoreductase | chr3:7557567-7557875 REVERSEweakly similar to ( 176) loc\_os01g27140 12001.m09165 protein glutaredoxin, putative, expressed seq=cds; coord=3:68751791..68752302:-1; parent\_gene=GRMZM2G110286'

'highly similar to ( 585) AT1G79460 | Symbols: GA2, KS, ATKS | GA2 (GA REQUIRING 2); ent-kaurene synthase | chr1:29890568-29894436 FORWARDhighly similar to ( 575) KSB\_CUCMA Ent-kaurene synthase B, chloroplast precursor (EC 4.2.3.19) (KSB) - Cucurbita maxima (Pumpkin) (Winter squash)highly similar to ( 755) loc\_os02g36220 12002.m100242 protein ent-kaurene synthase B, chloroplast precursor, putative, expressed seq=cds; coord=3:110185330..110189107:-1; parent\_gene=AC214360.3\_FG001'

'moderately similar to ( 319) AT1G27650 | Symbols: ATU2AF35A | ATU2AF35A; RNA binding / nucleic acid binding / nucleotide binding / zinc ion binding | chr1:9615302-9616042 FORWARDmoderately similar to ( 336) loc\_os05g48960 12005.m27978 protein splicing factor U2af 38 kDa subunit, putative, expressed seq=cds; coord=3:130373684..130374882:1; parent\_gene=GRMZM2G162119'

'highly similar to ( 527) AT1G34430 | Symbols: EMB3003 | EMB3003 (embryo defective 3003); acyltransferase/ dihydrolipoyllysine-residue acetyltransferase/ protein binding | chr1:12588027-12590084 REVERSEhighly similar to ( 592) loc\_os12g08170 12012.m04804 protein dihydrolipoyllysine-residue acetyltransferase component of pyruvatedehydrogenase complex, mitochondrial precursor, putative, expressed seq=cds; coord=3:139285416..139291670:-1; parent\_gene=GRMZM2G165176'

'highly similar to ( 600) AT2G01420 | Symbols: PIN4 | PIN4 (PIN-FORMED 4); auxin:hydrogen symporter/ transporter | chr2:180478-183199 REVERSEhighly similar to ( 747) PIN3A\_ORYSA Probable auxin efflux carrier component 3a (OsPIN3a) - Oryza sativa (Rice)highly similar to ( 747) loc\_os01g45550 12001.m150666 protein auxin efflux carrier component 3a, putative, expressed seq=cds; coord=3:214899506..214904595:-1; parent\_gene=GRMZM2G126260'

'weakly similar to ( 116) AT3G12680 | Symbols: HUA1 | HUA1 (ENHANCER OF AG-4 1); RNA binding | chr3:4025276-4028999 REVERSEvery weakly similar to (89.4) ZFNL2\_ORYSA Zinc finger CCCH domain-containing protein ZFN-like 2 - Oryza sativa (Rice)weakly similar to ( 140) loc\_os01g42970 12001.m42678 protein zinc finger C-x8-C-x5-C-x3-H type family protein, expressed seq=cds; coord=3:225587126..225603442:-1; parent\_gene=GRMZM2G422205'

'very weakly similar to (97.4) AT2G28660 | Symbols: | copper-binding family protein | chr2:12295419-12296944 FORWARDweakly similar to ( 172) loc\_os08g31340 12008.m07132 protein heavy metal-associated domain containing protein, expressed seq=cds; coord=4:75504615..75508224:1; parent\_gene=GRMZM2G166711'

'moderately similar to ( 213) AT5G65380 | Symbols: | ripening-responsive protein, putative | chr5:26123241-26126352 REVERSEmoderately similar to ( 300) loc\_os08g37432 12008.m26847 protein transparent testa 12 protein, putative, expressed seq=cds; coord=4:86500374..86504689:1; parent\_gene=GRMZM2G043075'

'very weakly similar to (99.0) AT1G03140 | Symbols: | splicing factor Prp18 family protein | chr1:754471-756223 REVERSEweakly similar to ( 122) loc\_os07g38420 12007.m08088 protein prp18 domain containing protein, expressed seq=cds; coord=4:87875630..87877015:-1; parent\_gene=GRMZM2G011034'

'very weakly similar to (99.0) AT2G41140 | Symbols: CRK1, ATCRK1, ATCBK3 | CRK1 (CDPK-RELATED KINASE 1); calcium ion binding / calcium-dependent protein serine/threonine phosphatase/ calmodulin-dependent protein kinase/ kinase | chr2:17150492-17153378 FORWARDvery weakly similar to (91.7) CRK\_DAUCA CDPK-related protein kinase (EC 2.7.11.1) (PK421) - Daucus carota (Carrot)weakly similar to ( 109) loc\_os10g36710 12010.m06477 protein CDPK-related protein kinase, putative, expressed seq=cds; coord=4:96426356..96430071:1; parent\_gene=GRMZM2G378949'

'weakly similar to ( 113) AT3G18710 | Symbols: PUB29, ATPUB29 | PUB29 (PLANT U-BOX 29); ubiquitin-protein ligase | chr3:6434234-6435481 REVERSEmoderately similar to ( 438) loc\_os02g33680 12002.m08459 protein U-box domain containing protein, expressed seq=cds; coord=4:111895429..111896985:1; parent\_gene=GRMZM2G127690'

'highly similar to ( 729) AT3G10340 | Symbols: PAL4 | PAL4 (Phenylalanine ammonia-lyase 4); ammonia ligase/ ammonia-lyase/ catalytic | chr3:3204260-3207809 FORWARDhighly similar to ( 915) PAL1\_ORYSA Phenylalanine ammonia-lyase (EC 4.3.1.5) - Oryza sativa (Rice)highly similar to ( 915) loc\_os02g41630 12002.m33418 protein phenylalanine ammonia-lyase, putative, expressed seq=cds; coord=4:143376935..143381141:-1; parent\_gene=GRMZM2G160541'

'moderately similar to ( 421) AT4G31750 | Symbols: WIN2 | WIN2 (HOPW1-1-INTERACTING 2); protein serine/threonine phosphatase | chr4:15364657-15367207 REVERSEmoderately similar to ( 457) loc\_os02g05630 12002.m33555 protein protein phosphatase 2C isoform epsilon, putative, expressed seq=cds; coord=4:237508371..237511930:-1; parent\_gene=GRMZM2G166035'

'moderately similar to ( 421) AT4G31750 | Symbols: WIN2 | WIN2 (HOPW1-1-INTERACTING 2); protein serine/threonine phosphatase | chr4:15364657-15367207 REVERSEmoderately similar to ( 457) loc\_os02g05630 12002.m33555 protein protein phosphatase 2C isoform epsilon, putative, expressed seq=cds; coord=4:237508371..237511930:-1; parent\_gene=GRMZM2G166035'

'moderately similar to ( 408) AT3G02875 | Symbols: ILR1 | ILR1 (IAA-LEUCINE RESISTANT 1); IAA-Leu conjugate hydrolase/ IAA-Phe conjugate hydrolase/ metallopeptidase | chr3:631993-633859 FORWARDhighly similar to ( 581) loc\_os03g62060 12003.m11084 protein IAA-amino acid hydrolase ILR1 precursor, putative, expressed seq=cds; coord=5:1569535..1572475:-1; parent\_gene=GRMZM2G125552'

'moderately similar to ( 270) AT1G75560 | Symbols: | zinc knuckle (CCHC-type) family protein | chr1:28371420-28372717 REVERSEmoderately similar to ( 389) loc\_os03g60600 12003.m10949 protein cellular nucleic acid-binding protein, putative, expressed seq=cds; coord=5:2358363..2361474:1; parent\_gene=GRMZM2G003068'

'moderately similar to ( 270) AT1G75560 | Symbols: | zinc knuckle (CCHC-type) family protein | chr1:28371420-28372717 REVERSEmoderately similar to ( 389) loc\_os03g60600 12003.m10949 protein cellular nucleic acid-binding protein, putative, expressed seq=cds; coord=5:2358363..2361474:1; parent\_gene=GRMZM2G003068'

'highly similar to ( 648) AT4G14680 | Symbols: APS3 | APS3; sulfate adenylyltransferase (ATP) | chr4:8413443-8415311 REVERSEhighly similar to ( 767) loc\_os03g53230 12003.m10296 protein bifunctional 3-phosphoadenosine 5-phosphosulfate synthetase, putative, expressed seq=cds; coord=5:7702248..7706223:1; parent\_gene=GRMZM2G051270'

'weakly similar to ( 125) AT4G30820 | Symbols: | cyclin-dependent kinase-activating kinase assembly factor-related / CDK-activating kinase assembly factor-related | chr4:15007144-15008378 FORWARDmoderately similar to ( 251) loc\_os1lg28350 12011.m06753 protein CDK-activating kinase assembly factor MAT1 family protein, expressed seq=cds; coord=5:7856601..7858786:-1; parent\_gene=GRMZM2G147814'

'moderately similar to ( 417) AT1G66170 | Symbols: MMD1 | MMD1 (MALE MEIOCYTE DEATH 1); DNA binding / protein binding / zinc ion binding | chr1:24638793-24641222 REVERSEhighly similar to ( 932) loc\_os03g50780 12003.m10064 protein PHD-finger family protein, expressed seq=cds; coord=5:10436880..10440158:1; parent\_gene=GRMZM2G408897'

'moderately similar to ( 268) AT1G73500 | Symbols: ATMKK9, MKK9 | MKK9 (MAP KINASE KINASE 9); MAP kinase kinase/ kinase/ protein kinase activator | chr1:27639419-27640351 REVERSEweakly similar to ( 162) M2K1\_ORYSA Mitogen-activated protein kinase kinase 1 (EC 2.7.12.2) (MAP kinase kinase 1) (MAPKK1) (OsMEK1) - Oryza sativa (Rice)moderately similar to ( 417) loc\_os03g50550 12003.m10046 protein OsMKK10-3 - putative MAPKK based on amino acid sequence homology seq=cds; coord=5:10708282..10709572:-1; parent\_gene=GRMZM2G163217'

'highly similar to ( 976) AT2G33730 | Symbols: | DEAD box RNA helicase, putative | chr2:14265679-14267880 REVERSEmoderately similar to ( 282) DB10\_NICSY ATP-dependent RNA helicase-like protein DB10 (EC 3.6.1.-) - Nicotiana sylvestris (Wood tobacco)nearly identical (1077) loc\_os03g50090 12003.m101465 protein ATP-dependent RNA helicase DDX23, putative, expressed seq=cds; coord=5:11603270..11605894:1; parent\_gene=GRMZM2G123459'

'weakly similar to ( 112) AT5G47430 | Symbols: | zinc ion binding | chr5:19235819-19240147 REVERSEmoderately similar to ( 352) loc\_os03g45730 12003.m09596 protein zinc knuckle family protein, expressed seq=cds; coord=5:15203912..15207473:1; parent\_gene=GRMZM2G379428'

'moderately similar to ( 248) AT5G17860 | Symbols: CAX7 | CAX7 (calcium exchanger 7); calcium:sodium antiporter/ cation:cation antiporter | chr5:5902638-5904350 REVERSEmoderately similar to ( 434) loc\_os03g45370 12003.m09566 protein K-exchanger-like protein, putative, expressed seq=cds; coord=5:15447458..15449344:-1; parent\_gene=GRMZM2G340578'

'weakly similar to ( 140) AT4G01320 | Symbols: ATSTE24, STE24 | ATSTE24; endopeptidase/ metalloendopeptidase | chr4:545905-549002 FORWARDweakly similar to ( 169) loc\_os02g45650 12002.m09602 protein CAAX prenyl protease 1, putative, expressed seq=cds; coord=5:23500810..23503479:1; parent\_gene=GRMZM2G422539'

'moderately similar to ( 333) AT5G65270 | Symbols: AtRABA4a | AtRABA4a (Arabidopsis Rab GTPase homolog A4a); GTP binding | chr5:26083437-26084550 FORWARDmoderately similar to ( 347) RB11D\_TOBAC Ras-related protein Rab11D - Nicotiana tabacum (Common tobacco)moderately similar to ( 413) loc\_os10g23100 12010.m05315 protein ras-related protein Rab11D, putative, expressed seq=cds; coord=5:37836454..37846968:1; parent\_gene=GRMZM2G122805'

'moderately similar to ( 333) AT5G65270 | Symbols: AtRABA4a | AtRABA4a (Arabidopsis Rab GTPase homolog A4a); GTP binding | chr5:26083437-26084550 FORWARDmoderately similar to ( 347) RB11D\_TOBAC Ras-related protein Rab11D - Nicotiana tabacum (Common tobacco)moderately similar to ( 413) loc\_os10g23100 12010.m05315 protein ras-related protein Rab11D, putative, expressed seq=cds; coord=5:37836454..37846968:1; parent\_gene=GRMZM2G122805'

'moderately similar to ( 232) loc\_os10g10180 12010.m065357 protein CMV 1a interacting protein 1, putative, expressed seq=cds; coord=5:38151595..38154162:1; parent\_gene=GRMZM2G005260'

'weakly similar to ( 108) AT3G62770 | Symbols: AtATG18a | AtATG18a | chr3:23219091-23221110 REVERSEweakly similar to ( 133) loc\_os01g70780 12001.m13123 protein WD-repeat domain phosphoinositide-interacting protein 3, putative, expressed seq=cds; coord=5:38858745..38859757:1; parent\_gene=GRMZM2G436064'

'weakly similar to ( 133) AT1G02065 | Symbols: SPL8 | SPL8 (SQUAMOSA PROMOTER BINDING PROTEIN-LIKE 8); DNA binding | chr1:365625-367149 FORWARDweakly similar to ( 127) LG1\_MAIZE LIGULELESS1 protein - Zea mays (Maize)moderately similar to ( 228) loc\_os02g08070 12002.m06153 protein SBP-domain protein 1, putative, expressed seq=cds; coord=5:88791487..88794405:1; parent\_gene=GRMZM2G111136'

'highly similar to ( 567) AT2G25490 | Symbols: EBF1, FBL6 | EBF1 (EIN3-BINDING F BOX PROTEIN 1); protein binding / ubiquitin-protein ligase | chr2:10848018-10850275 REVERSEhighly similar to ( 974) loc\_os02g10700 12002.m06368 protein EIN3-binding F-box protein 2, putative, expressed seq=cds; coord=5:115728940..115731973:1; parent\_gene=GRMZM2G069649'

'moderately similar to ( 397) AT1G53490 | Symbols: | DNA binding | chr1:19965146-19966811 FORWARDhighly similar to ( 508) loc\_os02g13810 12002.m33977 protein DNA binding protein, putative, expressed seq=cds; coord=5:150088686..150095175:1; parent\_gene=GRMZM2G019971'

'weakly similar to ( 172) loc\_os02g30810 12002.m08224 protein OsSAUR10 - Auxin-responsive SAUR gene family member, expressed seq=cds; coord=5:164364957..164366457:-1; parent\_gene=GRMZM2G312274'

'weakly similar to ( 101) AT5G13330 | Symbols: Rap2.6L | Rap2.6L (related to AP2 6L); DNA binding / transcription factor | chr5:4272384-4274461 FORWARDvery weakly similar to (80.5) ERF1\_TOBAC Ethylene-responsive transcription factor 1 (Ethylene-responsive element-binding factor 1) (EREBP-1) (NtERF1) - Nicotiana tabacum (Common tobacco)weakly similar to ( 151) loc\_os02g32140 12002.m08307 protein AP2 domain transcription factor, putative, expressed seq=cds; coord=5:166319262..166321982:-1; parent\_gene=GRMZM2G016434'

'nearly identical (1214) AT5G03650 | Symbols: SBE2.2 | SBE2.2 (starch branching enzyme 2.2); 1,4-alpha-glucan branching enzyme | chr5:931924-937470 FORWARDnearly identical (1638) GLGB\_MAIZE 1,4-alpha-glucan branching enzyme IIB, chloroplast precursor (EC 2.4.1.18) (Starch branching enzyme IIB) (Q-enzyme) - Zea mays (Maize)nearly identical (1366) loc\_os02g32660 12002.m33706 protein 1,4-alpha-glucan branching enzyme IIB, chloroplast precursor, putative, expressed seq=cds; coord=5:168451664..168468750:-1; parent\_gene=GRMZM2G032628'

'highly similar to ( 891) AT5G22470 | Symbols: | NAD

'highly similar to ( 891) AT5G22470 | Symbols: | NAD

'moderately similar to ( 483) AT5G39350 | Symbols: | pentatricopeptide (PPR) repeat-containing protein | chr5:15750929-15752962 FORWARDweakly similar to ( 110) RF1\_ORYSA Rf1 protein, mitochondrial precursor (PPR protein) (Fertility restorer) (Restorer for CMS) - Oryza sativa (Rice)highly similar to ( 803) loc\_os02g44480 12002.m09488 protein vegetative storage protein, putative seq=cds; coord=5:193120609..193122819:-1; parent\_gene=GRMZM2G014977'

'weakly similar to ( 123) AT4G34530 | Symbols: CIB1 | CIB1 (CRYPTOCHROME-INTERACTING BASIC-HELIX-LOOP-HELIX 1); DNA binding / transcription factor | chr4:16498466-16499946 FORWARDmoderately similar to ( 310) loc\_os02g47660 12002.m09800 protein BHLH transcription factor, putative, expressed seq=cds; coord=5:200937560..200939972:-1; parent\_gene=GRMZM2G101350'

'highly similar to ( 605) AT3G27740 | Symbols: CARA | CARA (CARBAMOYL PHOSPHATE SYNTHETASE A); carbamoyl-phosphate synthase (glutamine-hydrolyzing)/ carbamoyl-phosphate synthase/ catalytic | chr3:10281470-10283792 REVERSEhighly similar to ( 758) loc\_os02g47850 12002.m33834 protein carbamoyl-phosphate synthase small chain, putative, expressed seq=cds; coord=5:201452200..201457279:1; parent\_gene=GRMZM2G147450'

'moderately similar to ( 285) AT3G03380 | Symbols: DegP7 | DegP7 (DegP protease 7); catalytic/ protein binding / serine-type endopeptidase/ serine-type peptidase | chr3:799720-808319 FORWARDmoderately similar to ( 327) loc\_os02g48180 12002.m09852 protein expressed protein seq=cds; coord=5:202209988..202211260:-1; parent\_gene=GRMZM2G079352'

'weakly similar to ( 157) AT2G32950 | Symbols: COP1, ATCOP1, DET340, FUS1, EMB168 | COP1 (CONSTITUTIVE PHOTOMORPHOGENIC 1); protein binding / ubiquitin-protein ligase | chr2:13978000-13983282 FORWARDweakly similar to ( 155) COP1\_PEA E3 ubiquitin ligase protein COP1 (EC 6.3.2.-) (Constitutive photomorphogenesis protein 1) - Pisum sativum (Garden pea)moderately similar to ( 218) loc\_os02g53140 12002.m10343 protein ubiquitin ligase protein COP1, putative, expressed seq=cds; coord=5:210747893..210749120:-1; parent\_gene=GRMZM2G104920'

'weakly similar to ( 158) AT2G18650 | Symbols: MEE16 | MEE16 (maternal effect embryo arrest 16); protein binding / zinc ion binding | chr2:8086860-8088131 REVERSEhighly similar to ( 81.6) EL5\_ORYSA E3 ubiquitin-protein ligase EL5 (EC 6.3.2.-) - Oryza sativa (Rice)moderately similar to ( 390) loc\_os02g54830 12002.m10511 protein RING-H2 finger protein ATL2C, putative, expressed seq=cds; coord=5:213076220..213078683:-1; parent\_gene=GRMZM2G122284'

'highly similar to ( 520) AT1G80480 | Symbols: PTAC17 | PTAC17 (PLASTID TRANSCRIPTIONALLY ACTIVE17) | chr1:30258272-30260570 REVERSEhighly similar to ( 599) loc\_os02g55630 12002.m10588 protein nuclear WD protein, putative, expressed seq=cds; coord=5:214122497..214132628:1; parent\_gene=GRMZM2G180418'

'moderately similar to ( 377) AT1G71980 | Symbols: | protease-associated zinc finger (C3HC4-type RING finger) family protein | chr1:27098250-27099881 FORWARDhighly similar to ( 561) loc\_os03g07130 12003.m101101 protein RING finger protein 13, putative, expressed seq=cds; coord=6:1335084..1338778:1; parent\_gene=GRMZM2G423956'

'weakly similar to ( 103) AT1G60950 | Symbols: FED A, ATFD2 | FED A; 2 iron, 2 sulfur cluster binding / electron carrier/ iron-sulfur cluster binding | chr1:22444565-22445011 FORWARDweakly similar to ( 182) FER1\_MAIZE Ferredoxin-1, chloroplast precursor (Ferredoxin I) (Fd I) - Zea mays (Maize)weakly similar to ( 130) loc\_os08g01380 12008.m080056 protein ferredoxin-1, chloroplast precursor, putative, expressed seq=cds; coord=6:1340171..1341142:-1; parent\_gene=GRMZM2G122337'

'moderately similar to ( 474) AT1G30520 | Symbols: AAE14 | AAE14 (Acyl-Activating Enzyme 14); AMP binding / o-succinylbenzoate-CoA ligase | chr1:10811039-10813546 FORWARDweakly similar to ( 141) 4CL1\_ORYSA 4-coumarate--CoA ligase 1 (EC 6.2.1.12) (4CL 1) (4-coumaroyl-CoA synthase 1) - Oryza sativa (Rice)moderately similar to ( 379) loc\_os08g03630 12008.m04507 protein AMP binding protein, putative, expressed seq=cds; coord=6:9200187..9203512:-1; parent\_gene=GRMZM2G066426'

'weakly similar to ( 150) AT3G46920 | Symbols: | protein kinase family protein | chr3:17280430-17284857 REVERSEnearly identical (1098) loc\_os06g08280 12006.m05549 protein protein kinase domain containing protein, expressed seq=cds; coord=6:50243540..50249018:1; parent\_gene=GRMZM2G145360'

'weakly similar to ( 112) AT3G07490 | Symbols: AGD11 | AGD11 (ARF-GAP domain 11); calcium ion binding | chr3:2391189-2391650 FORWARDmoderately similar to ( 238) loc\_os06g07560 12006.m05479 protein calcium ion binding protein, putative, expressed seq=cds; coord=6:122664101..122665496:1; parent\_gene=GRMZM2G071100'

'nearly identical (1205) AT1G15690 | Symbols: AVP1, ATAVP3, AVP-3 | AVP1; ATPase/ hydrogen-translocating pyrophosphatase | chr1:5399115-5402185 FORWARDnearly identical (1279) AVP\_HORVU Pyrophosphate-energized vacuolar membrane proton pump (EC 3.6.1.1) (Pyrophosphate-energized inorganic pyrophosphatase) (H(

'weakly similar to ( 106) loc\_os06g45230 12006.m09050 protein pollen allergen Phl p 2 precursor, putative, expressed seq=cds; coord=6:157349767..157350512:1; parent\_gene=GRMZM2G007708'

'weakly similar to ( 176) AT4G11060 | Symbols: MTSSB | MTSSB (mitochondrially targeted single-stranded DNA binding protein); single-stranded DNA binding | chr4:6754820-6756230 REVERSEmoderately similar to ( 241) loc\_os05g43440 12005.m08472 protein single-stranded DNA-binding protein, putative, expressed seq=cds; coord=6:157863131..157865522:-1; parent\_gene=GRMZM2G032847'



'moderately similar to ( 308) AT4G08150 | Symbols: KNAT1, BP, BP1 | KNAT1 (KNOTTED-LIKE FROM ARABIDOPSIS THALIANA); transcription factor | chr4:5147969-5150610 REVERSEmoderately similar to ( 463) RSH1\_MAIZE Homeobox protein rough sheath 1 - Zea mays (Maize)moderately similar to ( 427) loc\_os07g03770 12007.m04847 protein homeobox protein rough sheath 1, putative, expressed seq=cds; coord=7:3664698..3670891:1; parent\_gene=GRMZM2G028041'

'highly similar to ( 560) AT1G73100 | Symbols: SUVH3, SDG19 | SUVH3 (SU(VAR)3-9 HOMOLOG 3); histone methyltransferase | chr1:27491970-27493979 FORWARDnearly identical (1170) loc\_os11g38900 12011.m07738 protein histone-lysine N-methyltransferase, H3 lysine-9 specific SUVH1, putative, expressed seq=cds; coord=7:20244021..20246591:1; parent\_gene=AC233961.1\_FG001'

'highly similar to ( 573) AT3G06920 | Symbols: | pentatricopeptide (PPR) repeat-containing protein | chr3:2181717-2184449 FORWARDweakly similar to ( 186) RF1\_ORYSA Rf1 protein, mitochondrial precursor (PPR protein) (Fertility restorer) (Restorer for CMS) - Oryza sativa (Rice)highly similar to ( 697) loc\_os07g14530 12007.m079646 protein expressed protein seq=cds; coord=7:25155947..25157555:1; parent\_gene=GRMZM2G086757'

'weakly similar to ( 110) loc\_os07g18990 12007.m06338 protein PVR3-like protein, putative, expressed seq=cds; coord=7:31086409..31087079:1; parent\_gene=GRMZM2G000221'

'very weakly similar to ( 100) AT3G45280 | Symbols: SYP72, ATSYP72 | SYP72 (SYNTAXIN OF PLANTS 72); protein transporter | chr3:16611445-16613304 REVERSEweakly similar to ( 136) loc\_os09g19550 12009.m05163 protein syntaxin 72, putative seq=cds; coord=7:95533897..95534429:1; parent\_gene=GRMZM2G360648'

'moderately similar to ( 466) AT1G79360 | Symbols: ATOCT2 | ATOCT2 (ARABIDOPSIS THALIANA ORGANIC CATION/CARNITINE TRANSPORTER 2); carbohydrate transmembrane transporter/ sugar:hydrogen symporter | chr1:29854140-29855723 REVERSEhighly similar to ( 679) loc\_os07g37510 12007.m08001 protein carbohydrate transporter/ sugar porter, putative seq=cds; coord=7:157503067..157505302:1; parent\_gene=GRMZM2G019974'

'moderately similar to ( 466) AT1G79360 | Symbols: ATOCT2 | ATOCT2 (ARABIDOPSIS THALIANA ORGANIC CATION/CARNITINE TRANSPORTER 2); carbohydrate transmembrane transporter/ sugar:hydrogen symporter | chr1:29854140-29855723 REVERSEhighly similar to ( 679) loc\_os07g37510 12007.m08001 protein carbohydrate transporter/ sugar porter, putative seq=cds; coord=7:157503067..157505302:1; parent\_gene=GRMZM2G019974'

'moderately similar to ( 302) AT5G55600 | Symbols: | agetn domain-containing protein / bromo-adjacent homology (BAH) domain-containing protein | chr5:22522232-22524796 REVERSEhighly similar to ( 632) loc\_os07g41640 12007.m29252 protein DNA binding protein, putative, expressed seq=cds; coord=7:164824657..164829482:1; parent\_gene=GRMZM2G037444'

'moderately similar to ( 226) loc\_os07g47400 12007.m08957 protein SRC2, putative, expressed seq=cds; coord=7:172433682..172434802:1; parent\_gene=GRMZM2G364643'

'nearly identical (1079) AT2G40540 | Symbols: KT2, ATKT2, SHY3, KUP2, ATKUP2, TRK2 | KT2 (POTASSIUM TRANSPORTER 2); potassium ion transmembrane transporter | chr2:16931445-16934516 FORWARDnearly identical (1287) HAK9\_ORYSA Probable potassium transporter 9 (OsHAK9) - Oryza sativa (Rice)nearly identical (1287) loc\_os07g48130 12007.m079793 protein potassium transporter 9, putative, expressed seq=cds; coord=7:172935556..172939916:-1; parent\_gene=GRMZM2G166738'

'weakly similar to ( 131) AT5G39660 | Symbols: CDF2 | CDF2 (CYCLING DOF FACTOR 2); DNA binding / protein binding / transcription factor | chr5:15878920-15880712 FORWARDvery weakly similar to (92.8) MNB1A\_MAIZE Dof zinc finger protein MNB1A - Zea mays (Maize)moderately similar to ( 399) loc\_os07g48570 12007.m09068 protein expressed protein seq=cds; coord=7:173806883..173808319:-1; parent\_gene=AC155434.2\_FG006'

'weakly similar to ( 131) AT5G39660 | Symbols: CDF2 | CDF2 (CYCLING DOF FACTOR 2); DNA binding / protein binding / transcription factor | chr5:15878920-15880712 FORWARDvery weakly similar to (92.8) MNB1A\_MAIZE Dof zinc finger protein MNB1A - Zea mays (Maize)moderately similar to ( 399) loc\_os07g48570 12007.m09068 protein expressed protein seq=cds; coord=7:173806883..173808319:-1; parent\_gene=AC155434.2\_FG006'

'moderately similar to ( 447) AT3G14067 | Symbols: | subtilase family protein | chr3:4658421-4660754 REVERSEhighly similar to ( 798) loc\_os07g48650 12007.m09076 protein xylem serine proteinase 1 precursor, putative, expressed seq=cds; coord=7:174029436..174031718:1; parent\_gene=GRMZM2G059165'

'moderately similar to ( 352) AT3G06560 | Symbols: | polynucleotide adenylyltransferase/ protein binding | chr3:2044443-2047034 FORWARDhighly similar to ( 560) loc\_os07g48890 12007.m09098 protein poly, putative, expressed seq=cds; coord=7:174102328..174107989:-1; parent\_gene=GRMZM2G470461'

'highly similar to ( 830) AT1G74850 | Symbols: PTAC2 | PTAC2 (PLASTID TRANSCRIPTIONALLY ACTIVE2) | chr1:28119237-28122314 REVERSEweakly similar to ( 164) RF1\_ORYSA Rf1 protein, mitochondrial precursor (PPR protein) (Fertility restorer) (Restorer for CMS) - Oryza sativa (Rice)nearly identical (1404) loc\_os03g60910 12003.m10978 protein ATP binding protein, putative, expressed seq=cds; coord=7:175277814..175287244:1; parent\_gene=GRMZM2G122116'

'moderately similar to ( 228) AT5G58230 | Symbols: MSII, MEE70, ATMSII | MSII (MULTICOPY SUPPRESSOR OF IRA1); protein binding | chr5:23556112-23557994 FORWARDmoderately similar to ( 288) loc\_os09g36900 12009.m06639 protein WD-40 repeat protein MSII, putative, expressed seq=cds; coord=7:175560055..175567020:-1; parent\_gene=GRMZM2G032711'

'moderately similar to ( 382) AT3G14440 | Symbols: NCED3, ATNCED3, STO1, SIS7 | NCED3 (NINE-CIS-EPOXYCAROTENOID DIOXYGENASE 3); 9-cis-epoxycarotenoid dioxygenase | chr3:4831678-4833477 REVERSEmoderately similar to ( 447) loc\_os07g05940 12007.m05058 protein viviparous-14, putative, expressed seq=cds; coord=7:175861745..175863458:-1; parent\_gene=GRMZM2G330848'

'moderately similar to ( 224) AT2G01275 | Symbols: | zinc finger (C3HC4-type RING finger) family protein | chr2:142610-143809 REVERSEmoderately similar to ( 413) loc\_os01g03100 12001.m42845 protein protein binding protein, putative, expressed seq=cds; coord=8:10287956..10291623:-1; parent\_gene=GRMZM2G003930'

'highly similar to ( 870) AT3G18060 | Symbols: | transducin family protein / WD-40 repeat family protein | chr3:6183880-6186788 FORWARDnearly identical (1165) loc\_os01g03510 12001.m06989 protein stress protein, putative, expressed seq=cds; coord=8:10870907..10877056:1; parent\_gene=GRMZM2G030384'

'moderately similar to ( 223) AT1G66980 | Symbols: | protein kinase family protein / glycerophosphoryl diester phosphodiesterase family protein | chr1:24997491-25001961 REVERSEweakly similar to ( 111) KPRO\_MAIZE Putative receptor protein kinase ZmPK1 precursor (EC 2.7.11.1) - Zea mays (Maize)moderately similar to ( 433) loc\_os01g04490 12001.m07084 protein Ser/Thr protein kinase, putative, expressed seq=cds; coord=8:13288169..13290813:1; parent\_gene=GRMZM2G172368'

'highly similar to ( 825) AT5G54960 | Symbols: PDC2 | PDC2 (pyruvate decarboxylase-2); carboxy-lyase/ catalytic/ magnesium ion binding / pyruvate decarboxylase/ thiamin pyrophosphate binding | chr5:22310858-22312681 REVERSEhighly similar to ( 849) PDC1\_MAIZE Pyruvate decarboxylase isozyme 1 (EC 4.1.1.1) (PDC) - Zea mays (Maize)highly similar to ( 943) loc\_os01g06660 12001.m150484 protein pyruvate decarboxylase isozyme 1, putative, expressed seq=cds; coord=8:15548387..15551947:-1; parent\_gene=GRMZM2G038821'

'weakly similar to ( 134) AT1G70550 | Symbols: | unknown protein | chr1:26597510-26599888 FORWARDweakly similar to ( 159) loc\_os01g07570 12001.m07384 protein carboxyl-terminal proteinase, putative, expressed seq=cds; coord=8:17066051..17069207:-1; parent\_gene=GRMZM2G162928'

'moderately similar to ( 300) AT4G15550 | Symbols: IAGLU | IAGLU (INDOLE-3-ACETATE BETA-D-GLUCOSYLTRANSFERASE); UDP-glycosyltransferase/ transferase, transferring glycosyl groups | chr4:8877877-8879301 REVERSEmoderately similar to ( 209) IAAG\_MAIZE Indole-3-acetate beta-glucosyltransferase (EC 2.4.1.121) (IAA-Glu synthetase) ((Uridine 5'-diphosphate-glucose:indol-3-ylacetyl)-beta-D-glucosyl transferase) - Zea mays (Maize)highly similar to ( 521) loc\_os01g08440 12001.m07469 protein indole-3-acetate beta-glucosyltransferase, putative, expressed seq=cds; coord=8:18822079..18824101:-1; parent\_gene=GRMZM2G457929'

'highly similar to ( 563) AT5G45900 | Symbols: APG7, ATAPG7, ATG7, ATATG7 | APG7 (AUTOPHAGY 7); APG8 activating enzyme | chr5:18615304-18618436 FORWARDnearly identical (1514) loc\_os01g42850 12001.m42676 protein autophagy-related protein 7, putative, expressed seq=cds; coord=8:143154536..143162905:-1; parent\_gene=GRMZM2G005304'

'weakly similar to ( 198) AT3G12600 | Symbols: atnudt16 | atnudt16 (Arabidopsis thaliana Nudix hydrolase homolog 16); hydrolase | chr3:4004676-4005995 FORWARDmoderately similar to ( 248) loc\_os04g53380 12004.m10229 protein expressed protein seq=cds; coord=8:161926660..161930458:1; parent\_gene=GRMZM2G013060'

'weakly similar to ( 188) AT3G07340 | Symbols: | basic helix-loop-helix (bHLH) family protein | chr3:2341188-2343288 REVERSEhighly similar to ( 584) loc\_os01g68700 12001.m12972 protein BHLH transcription factor, putative, expressed seq=cds; coord=8:162557420..162560479:1; parent\_gene=GRMZM2G030762'

'moderately similar to ( 287) AT1G05600 | Symbols: | pentatricopeptide (PPR) repeat-containing protein | chr1:1672161-1673675 FORWARDweakly similar to ( 120) RF1\_ORYSA Rf1 protein, mitochondrial precursor (PPR protein) (Fertility restorer) (Restorer for CMS) - Oryza sativa (Rice)moderately similar to ( 454) loc\_os01g68550 12001.m12958 protein expressed protein seq=cds; coord=8:162788741..162790666:-1; parent\_gene=GRMZM2G170941'

'moderately similar to ( 360) AT5G16270 | Symbols: ATRAD21.3, SYN4 | SYN4 (SISTER CHROMATID COHESION 1 PROTEIN 4) | chr5:5316783-5322330 FORWARDnearly identical (1225) loc\_os01g67250 12001.m42786 protein N terminus of Rad21 / Rec8 like protein, expressed seq=cds; coord=8:164083362..164092361:1; parent\_gene=GRMZM2G421829'

'moderately similar to ( 354) AT5G25930 | Symbols: | leucine-rich repeat family protein / protein kinase family protein | chr5:9050880-9053978 FORWARDmoderately similar to ( 262) RPK1\_IPONI Receptor-like protein kinase precursor (EC 2.7.11.1) - Ipomoea nil (Japanese morning glory) (Pharbitis nil)highly similar to ( 620) loc\_os01g53920 12001.m42717 protein receptor-like protein kinase 5 precursor, putative, expressed seq=cds; coord=8:175185352..175188965:-1; parent\_gene=AC203173.3\_FG002'

'weakly similar to ( 128) AT2G45100 | Symbols: | RNA polymerase II transcription factor/ protein binding / transcription activator/ transcription regulator/ translation initiation factor/ zinc ion binding | chr2:18595348-18598088 REVERSEweakly similar to ( 186) loc\_os05g23940 12005.m06688 protein RNA polymerase II transcription factor/ transcription factor/ zinc ion binding protein, putative, expressed seq=cds; coord=9:2736110..2739733:-1; parent\_gene=GRMZM2G180836'

'moderately similar to ( 290) AT3G21350 | Symbols: | RNA polymerase transcriptional regulation mediator-related | chr3:7517106-7518587 FORWARDmoderately similar to ( 407) loc\_os06g11370 12006.m05854 protein RNA polymerase transcriptional regulation mediator, subunit 6, putative, expressed seq=cds; coord=9:7177254..7182212:-1; parent\_gene=GRMZM2G017537'

'moderately similar to ( 483) AT1G76680 | Symbols: OPR1, ATOPR1 | OPR1; 12-oxophytodienoate reductase | chr1:28776982-28778271 FORWARDhighly similar to ( 601) loc\_os06g11290 12006.m05846 protein 12-oxophytodienoate reductase 2, putative, expressed seq=cds; coord=9:7308153..7309906:1; parent\_gene=GRMZM2G000236'

'moderately similar to ( 209) AT3G10610 | Symbols: | 40S ribosomal protein S17 (RPS17C) | chr3:3319459-3319881 FORWARDmoderately similar to ( 263) loc\_os10g27190 12010.m05653 protein 40S ribosomal protein S17-4, putative, expressed seq=cds; coord=9:10319530..10320398:-1; parent\_gene=GRMZM2G086906'

'nearly identical (1092) AT1G18370 | Symbols: HIK, ATNACK1, NACK1 | HIK (HINKEL); ATP binding / microtubule motor | chr1:6319732-6323820 REVERSEmoderately similar to ( 228) FLA10\_CHLRE Kinesin-like protein FLA10 (Protein KHP1) - Chlamydomonas reinhardtii nearly identical (1558) loc\_os01g33040 12001.m09621 protein kinesin heavy chain, putative, expressed seq=cds; coord=9:26577949..26584519:1; parent\_gene=GRMZM2G136838'

'nearly identical (1092) AT1G18370 | Symbols: HIK, ATNACK1, NACK1 | HIK (HINKEL); ATP binding / microtubule motor | chr1:6319732-6323820 REVERSEmoderately similar to ( 228) FLA10\_CHLRE Kinesin-like protein FLA10 (Protein KHP1) - Chlamydomonas reinhardtii nearly identical (1558) loc\_os01g33040 12001.m09621 protein kinesin heavy chain, putative, expressed seq=cds; coord=9:26577949..26584519:1; parent\_gene=GRMZM2G136838'

'very weakly similar to (86.3) NLTP\_HELAN Nonspecific lipid-transfer protein precursor (LTP) (NsLTP) (SDI-9) - Helianthus annuus (Common sunflower)very weakly similar to (97.1) loc\_os06g34840 12006.m08021 protein nonspecific lipid-transfer protein 3 precursor, putative seq=cds; coord=9:61863515..61865024:1; parent\_gene=GRMZM2G025026'

'moderately similar to ( 239) AT3G62240 | Symbols: | zinc finger (C2H2 type) family protein | chr3:23033592-23036653 REVERSEmoderately similar to ( 327) loc\_os01g14840 12001.m08086 protein nucleic acid binding protein, putative, expressed seq=cds; coord=9:149278522..149280901:-1; parent\_gene=GRMZM2G004157'

'very weakly similar to (84.3) AT1G19490 | Symbols: | bZIP transcription factor family protein | chr1:6751953-6753959 REVERSEvery weakly similar to (99.0) loc\_os1g05640 12011.m04761 protein bZIP transcription factor family protein, expressed seq=cds; coord=10:5917109..5918148:1; parent\_gene=GRMZM2G365754'

'highly similar to ( 551) AT5G57710 | Symbols: | heat shock protein-related | chr5:23384794-23388052 FORWARDnearly identical (1225) loc\_os08g15230 12008.m05646 protein expressed protein seq=cds; coord=10:53478171..53482054:1; parent\_gene=GRMZM2G117836'

'weakly similar to ( 131) AT3G61970 | Symbols: NGA2 | NGA2 (NGATHA2); transcription factor | chr3:22951829-22952728 FORWARDweakly similar to ( 142) loc\_os11g05740 12011.m04770 protein B3 DNA binding domain containing protein, expressed seq=cds; coord=10:44121942..44122617:1; parent\_gene=GRMZM2G405170'

'very weakly similar to (93.6) ACPB\_RICCO Acyl-CoA-binding protein (ACBP) - Ricinus communis (Castor bean)very weakly similar to (99.0) loc\_os08g06550 12008.m04794 protein acyl-CoA-binding protein, putative, expressed seq=cds; coord=10:76402555..76404935:1; parent\_gene=GRMZM2G079908'

'weakly similar to ( 104) AT4G29930 | Symbols: | basic helix-loop-helix (bHLH) family protein | chr4:14644108-14645168 FORWARDweakly similar to ( 127) loc\_os04g23550 12004.m101486 protein DNA binding like, putative, expressed seq=cds; coord=10:76586652..76588863:1; parent\_gene=GRMZM2G042895'

'weakly similar to ( 140) AT4G16270 | Symbols: | peroxidase 40 (PER40) (P40) | chr4:9205038-9206483 FORWARDweakly similar to ( 132) PERN\_IPOBA Neutral peroxidase precursor (EC 1.11.1.7) (SwPN1) - Ipomoea batatas (Sweet potato) (Batate)moderately similar to ( 279) loc\_os05g04410 12005.m04974 protein peroxidase 2 precursor, putative, expressed seq=cds; coord=10:85683513..85689992:1; parent\_gene=GRMZM2G006727'

'very weakly similar to (88.6) loc\_os04g58710 12004.m35525 protein peroxisomal-coenzyme A synthetase, putative, expressed seq=cds; coord=10:138676374..138677343:1; parent\_gene=AF466202.2\_FG012'

'nearly identical (1406) AT3G23780 | Symbols: NRPD2A, DRD2, NRPD2, DMS2, NRPE2 | NRPD2A; DNA binding / DNA-directed RNA polymerase | chr3:8567971-8573819 REVERSEweakly similar to ( 145) RPOB\_CHAGL DNA-directed RNA polymerase beta chain (EC 2.7.7.6) (PEP) (Plastid-encoded RNA polymerase subunit beta) (RNA polymerase subunit beta) - Chaetosphaeridium globosumnearly identical (2018) loc\_os04g54840 12004.m10376 protein NRPD2a, putative, expressed seq=cds; coord=10:144716135..144739736:1; parent\_gene=GRMZM2G427031'

'highly similar to ( 862) AT1G01790 | Symbols: KEA1, ATKEA1 | KEA1 (K EFFLUX ANTIporter 1); potassium ion transmembrane transporter/ potassium:hydrogen antiporter | chr1:284781-290869 FORWARDnearly identical (1261) loc\_os04g58620 12004.m10744 protein KEA1, putative, expressed seq=cds; coord=10:148572678..148584114:-1; parent\_gene=GRMZM2G093643'

'weakly similar to ( 101) loc\_os03g20760 12003.m07483 protein lipid binding protein, putative, expressed seq=cds; coord=1:52625970..52627201:-1; parent\_gene=GRMZM2G174680'

'highly similar to ( 909) AT4G26590 | Symbols: ATOPT5, OPT5 | OPT5 (OLIGOPEPTIDE TRANSPORTER 5); oligopeptide transporter | chr4:13414134-13416850 REVERSEnearly identical (1264) loc\_os08g38400 12008.m26725 protein oligopeptide transporter 5, putative, expressed seq=cds; coord=1:183096381..183099093:1; parent\_gene=GRMZM2G152555'

'very weakly similar to (97.4) AT3G13224 | Symbols: | RNA recognition motif (RRM)-containing protein | chr3:4254848-4256621 FORWARDweakly similar to ( 148) loc\_os08g38410 12008.m07825 protein RNA recognition motif family protein, expressed seq=cds; coord=1:183150234..183151288:-1; parent\_gene=AC233867.1\_FG004'

'nearly identical (1025) AT4G12650 | Symbols: | LOCATED IN: integral to membrane, Golgi apparatus, plasma membrane, vacuole; EXPRESSED IN: 25 plant structures; EXPRESSED DURING: 13 growth stages; CONTAINS InterPro DOMAIN/s: Nonaspanin (TM9SF) (InterPro:IPR004240); BEST Arabidopsis thaliana protein match is: unknown protein (TAIR:AT5G35160.1); Has 983 Blast hits to 980 proteins in 161 species: Archae - 0; Bacteria - 0; Metazoa - 434; Fungi - 144; Plants - 228; Viruses - 0; Other Eukaryotes - 177 (source: NCBI BLINK). | chr4:7468207-7470165 REVERSEnearly identical (1158) loc\_os08g38820 12008.m080200 protein transmembrane 9 superfamily protein member 2 precursor, putative, expressed seq=cds; coord=1:183841405..183844417:1; parent\_gene=GRMZM2G113899'

'very weakly similar to (98.2) AT1G28960 | Symbols: ATNUDT15, ATNUDX15 | ATNUDX15 (ARABIDOPSIS THALIANA NUDIX HYDROLASE HOMOLOG 15); hydrolase | chr1:10110135-10111607 REVERSEweakly similar to ( 137) loc\_os08g28840 12008.m06889 protein peroxisomal coenzyme A diphosphatase NUDT7, putative, expressed seq=cds; coord=1:220074365..220075536:-1; parent\_gene=GRMZM2G136426'

'moderately similar to ( 209) AT3G24120 | Symbols: | myb family transcription factor | chr3:8705925-8708148 REVERSEmoderately similar to ( 307) loc\_os08g25799 12008.m06596 protein myb family transcription factor-related protein, putative, expressed seq=cds; coord=1:221574382..221584578:-1; parent\_gene=GRMZM2G113742'

'moderately similar to ( 384) AT1G61790 | Symbols: | OST3/OST6 family protein | chr1:22814390-22815430 FORWARDhighly similar to ( 535) loc\_os03g36730 12003.m08792 protein oligosaccharide transporter, putative, expressed seq=cds; coord=1:222130457..222134768:1; parent\_gene=GRMZM2G149946'

'weakly similar to ( 148) AT5G33320 | Symbols: CUE1, PPT, ARAPPT | CUE1 (CAB UNDEREXPRESSED 1); antiporter/ triose-phosphate transmembrane transporter | chr5:12588950-12591408 FORWARDweakly similar to ( 178) loc\_os05g07870 12005.m05305 protein triose phosphate/phosphate translocator, non-green plastid,chloroplast precursor, putative, expressed seq=cds; coord=1:278628888..278632994:-1; parent\_gene=GRMZM2G147589'

'weakly similar to ( 179) AT5G57330 | Symbols: | aldose 1-epimerase family protein | chr5:23218392-23220664 FORWARDmoderately similar to ( 216) loc\_os04g56290 12004.m35496 protein apospory-associated protein C, putative, expressed seq=cds; coord=2:4174781..4178923:-1; parent\_gene=GRMZM2G039588'

'weakly similar to ( 179) AT5G57330 | Symbols: | aldose 1-epimerase family protein | chr5:23218392-23220664 FORWARDmoderately similar to ( 216) loc\_os04g56290 12004.m35496 protein apospory-associated protein C, putative, expressed seq=cds; coord=2:4174781..4178923:-1; parent\_gene=GRMZM2G039588'

'nearly identical (1518) AT4G30190 | Symbols: AHA2, PMA2 | AHA2; ATPase/ hydrogen-exporting ATPase, phosphorylative mechanism | chr4:14770820-14775920 REVERSEnearly identical (1675) PMA1\_ORYSA Plasma membrane ATPase (EC 3.6.3.6) (Proton pump) - Oryza sativa (Rice)nearly identical (1675) loc\_os04g56160 12004.m101441 protein plasma membrane ATPase, putative, expressed seq=cds; coord=2:4299718..4306692:-1; parent\_gene=GRMZM2G019404'

'moderately similar to ( 217) AT2G34830 | Symbols: WRKY35, MEE24, AtWRKY35 | WRKY35 (WRKY DNA-binding protein 35); transcription factor | chr2:14693839-14696378 REVERSEhighly similar to ( 550) loc\_os04g50920 12004.m09989 protein WRKY DNA binding domain containing protein, expressed seq=cds; coord=2:12799342..12803684:-1; parent\_gene=GRMZM2G024898'

'moderately similar to ( 224) AT2G41150 | Symbols: | unknown protein | chr2:17153851-17155633 FORWARDmoderately similar to ( 273) loc\_os03g25110 12003.m07854 protein expressed protein seq=cds; coord=2:136416109..136419742:-1; parent\_gene=GRMZM2G352947'

'weakly similar to ( 182) AT1G69010 | Symbols: BIM2 | BIM2 (BES1-interacting Myc-like protein 2); DNA binding / transcription factor | chr1:25941804-25943599 FORWARDhighly similar to ( 531) loc\_os09g29930 12009.m060079 protein transcription factor BIM2, putative, expressed seq=cds; coord=2:188529569..188535342:-1; parent\_gene=GRMZM2G009478'

'moderately similar to ( 485) AT4G39170 | Symbols: | SEC14 cytosolic factor, putative / phosphoglyceride transfer protein, putative | chr4:18240887-18243621 FORWARDhighly similar to ( 822) loc\_os09g30330 12009.m06184 protein phosphatidylinositol transporter/ transporter, putative, expressed seq=cds; coord=2:189219156..189224929:1; parent\_gene=GRMZM2G031837'

'weakly similar to ( 194) AT2G04780 | Symbols: FLA7 | FLA7 (FASCICLIN-LIKE ARABINOOGALACTAN 7) | chr2:1677488-1678252 FORWARDmoderately similar to ( 267) loc\_os09g30486 12009.m06208 protein fasciclin-like arabinogalactan protein 7 precursor, putative, expressed seq=cds; coord=2:189488589..189490512:-1; parent\_gene=GRMZM2G081017'

'weakly similar to ( 194) AT2G04780 | Symbols: FLA7 | FLA7 (FASCICLIN-LIKE ARABINOOGALACTAN 7) | chr2:1677488-1678252 FORWARDmoderately similar to ( 267) loc\_os09g30486 12009.m06208 protein fasciclin-like arabinogalactan protein 7 precursor, putative, expressed seq=cds; coord=2:189488589..189490512:-1; parent\_gene=GRMZM2G081017'

'weakly similar to ( 194) AT2G04780 | Symbols: FLA7 | FLA7 (FASCICLIN-LIKE ARABINOOGALACTAN 7) | chr2:1677488-1678252 FORWARDmoderately similar to ( 267) loc\_os09g30486 12009.m06208 protein fasciclin-like arabinogalactan protein 7 precursor, putative, expressed seq=cds; coord=2:189488589..189490512:-1; parent\_gene=GRMZM2G081017'

'weakly similar to ( 194) AT2G04780 | Symbols: FLA7 | FLA7 (FASCICLIN-LIKE ARABINOOGALACTAN 7) | chr2:1677488-1678252 FORWARDmoderately similar to ( 267) loc\_os09g30486 12009.m06208 protein fasciclin-like arabinogalactan protein 7 precursor, putative, expressed seq=cds; coord=2:189488589..189490512:-1; parent\_gene=GRMZM2G081017'

'moderately similar to ( 382) AT1G35910 | Symbols: | trehalose-6-phosphate phosphatase, putative | chr1:13363200-13364965 REVERSEmoderately similar to ( 413) loc\_os07g43160 12007.m08544 protein expressed protein seq=cds; coord=2:212477947..212480732:1; parent\_gene=GRMZM2G117564'

'moderately similar to ( 448) AT5G48910 | Symbols: | pentatricopeptide (PPR) repeat-containing protein | chr5:19832969-19834909 REVERSEvery weakly similar to (80.5) RF1\_ORYSA Rf1 protein, mitochondrial precursor (PPR protein) (Fertility restorer) (Restorer for CMS) - Oryza sativa (Rice)moderately similar to ( 438) loc\_os01g51790 12001.m11356 protein selenium-binding protein-like, putative seq=cds; coord=2:213162946..213164673:1; parent\_gene=GRMZM2G703373'

'nearly identical (1081) AT5G66760 | Symbols: SDH1-1 | SDH1-1; ATP binding / succinate dehydrogenase | chr5:26653776-26657224 FORWARDnearly identical (1104) DHSA\_ORYSA Succinate dehydrogenase [ubiquinone] flavoprotein subunit, mitochondrial precursor (EC 1.3.5.1) (FP) (Flavoprotein subunit of complex II) - Oryza sativa (Rice)nearly identical (1104) loc\_os07g04240 12007.m04893 protein succinate dehydrogenase flavoprotein subunit,mitochondrial precursor, putative, expressed seq=cds; coord=2:236245150..236250456:-1; parent\_gene=GRMZM2G079888'

'highly similar to ( 783) AT5G20490 | Symbols: XIK, ATXIK, XI-17 | XIK; motor/ protein binding | chr5:6927064-6936079 REVERSEhighly similar to ( 875) loc\_os05g46030 12005.m08728 protein myosin head family protein, expressed seq=cds; coord=3:203473493..203479533:1; parent\_gene=GRMZM2G113319'

'moderately similar to ( 247) AT4G18260 | Symbols: | cytochrome B561-related | chr4:10093524-10097337 REVERSEmoderately similar to ( 409) loc\_os01g47620 12001.m10956 protein expressed protein seq=cds; coord=3:210755678..210758890:1; parent\_gene=GRMZM2G024348'

'highly similar to ( 860) AT5G52920 | Symbols: PKP1, PKP-BETA1, PKP2 | PKP-BETA1 (PLASTIDIC PYRUVATE KINASE BETA SUBUNIT 1); pyruvate kinase | chr5:21463680-21466612 FORWARDhighly similar to ( 743) KPYG\_TOBAC Pyruvate kinase isozyme G, chloroplast precursor (EC 2.7.1.40) - Nicotiana tabacum (Common tobacco)nearly identical (1006) loc\_os01g47080 12001.m10904 protein pyruvate kinase isozyme G, chloroplast precursor, putative, expressed seq=cds; coord=3:211977378..211987454:1; parent\_gene=GRMZM2G152686'

'very weakly similar to ( 100) AT4G11140 | Symbols: CRF1 | CRF1 (CYTOKININ RESPONSE FACTOR 1); DNA binding / transcription factor | chr4:6794930-6795793 REVERSEvery weakly similar to (86.3) ERF3\_TOBAC Ethylene-responsive transcription factor 3 (Ethylene-responsive element-binding factor 3 homolog) (EREBP-5) (NtERF5) - Nicotiana tabacum (Common tobacco)moderately similar to ( 298) loc\_os01g46870 12001.m10884 protein ap2 domain protein, putative, expressed seq=cds; coord=3:212501262..212503692:1; parent\_gene=GRMZM2G160971'

'very weakly similar to ( 100) AT4G11140 | Symbols: CRF1 | CRF1 (CYTOKININ RESPONSE FACTOR 1); DNA binding / transcription factor | chr4:6794930-6795793 REVERSEvery weakly similar to (86.3) ERF3\_TOBAC Ethylene-responsive transcription factor 3 (Ethylene-responsive element-binding factor 3 homolog) (EREBP-5) (NtERF5) - Nicotiana tabacum (Common tobacco)moderately similar to ( 298) loc\_os01g46870 12001.m10884 protein ap2 domain protein, putative, expressed seq=cds; coord=3:212501262..212503692:1; parent\_gene=GRMZM2G160971'

'moderately similar to ( 259) AT5G41790 | Symbols: CIP1 | CIP1 (COP1-INTERACTIVE PROTEIN 1); protein binding | chr5:16727530-16732391 FORWARDweakly similar to ( 117) MFP1\_TOBAC MAR-binding filament-like protein 1-1 - Nicotiana tabacum (Common tobacco)highly similar to ( 836) loc\_os01g46810 12001.m10878 protein viral A-type inclusion protein repeat containing protein, expressed seq=cds; coord=3:212694107..212699938:1; parent\_gene=GRMZM2G118403'



'weakly similar to ( 107) AT4G23810 | Symbols: WRKY53, ATWRKY53 | WRKY53; DNA binding / protein binding / transcription activator/ transcription factor | chr4:12392666-12393739 REVERSEmoderately similar to ( 209) loc\_os01g46800 12001.m10877 protein OsWRKY15 - Superfamily of rice TFs having WRKY and zinc finger domains, expressed seq=cds; coord=3:212739888..212741312:1; parent\_gene=GRMZM2G408462'

'weakly similar to ( 163) AT5G55340 | Symbols: | long-chain-alcohol O-fatty-acyltransferase family protein / wax synthase family protein | chr5:22439985-22440986 REVERSEmoderately similar to ( 475) loc\_os01g46270 12001.m10825 protein wax synthase isoform 3, putative, expressed seq=cds; coord=3:213797343..213799289:-1; parent\_gene=GRMZM2G349407'

'highly similar to ( 627) AT2G26650 | Symbols: AKT1, ATAKT1 | AKT1 (ARABIDOPSIS K TRANSPORTER 1); cyclic nucleotide binding / inward rectifier potassium channel | chr2:11331965-11336444 REVERSEhighly similar to ( 824) AKT1\_ORYSA Potassium channel AKT1 (OsAKT1) - Oryza sativa (Rice)highly similar to ( 824) loc\_os01g45990 12001.m10798 protein potassium channel AKT1, putative, expressed seq=cds; coord=3:214273957..214280038:1; parent\_gene=GRMZM2G022915'

'very weakly similar to (97.4) loc\_os02g49326 12002.m09967 protein ribulose-1,5-bisphosphate carboxylase/oxygenase small subunit N-methyltransferase I, putative, expressed seq=cds; coord=3:214717181..214719614:-1; parent\_gene=AC212898.2\_FG006'

'very weakly similar to (97.4) loc\_os02g49326 12002.m09967 protein ribulose-1,5-bisphosphate carboxylase/oxygenase small subunit N-methyltransferase I, putative, expressed seq=cds; coord=3:214717181..214719614:-1; parent\_gene=AC212898.2\_FG006'

'moderately similar to ( 357) AT5G14260 | Symbols: | SET domain-containing protein | chr5:4601139-4603873 FORWARDmoderately similar to ( 451) loc\_os12g13460 12012.m05319 protein SET domain containing protein, expressed seq=cds; coord=3:215527347..215532128:-1; parent\_gene=GRMZM2G047695'

'moderately similar to ( 245) AT5G46410 | Symbols: | NLI interacting factor (NIF) family protein | chr5:18826007-18828156 FORWARDhighly similar to ( 522) loc\_os01g43870 12001.m97456 protein CTD-phosphatase-like protein, putative, expressed seq=cds; coord=3:216839393..216845277:-1; parent\_gene=GRMZM2G068690'

'weakly similar to ( 155) AT3G49290 | Symbols: ABIL2 | ABIL2 (ABL INTERACTOR-LIKE PROTEIN 2) | chr3:18273407-18275221 FORWARDmoderately similar to ( 213) ABIL2\_ORYSA Putative protein ABIL2 (Abl interactor-like protein 2) - Oryza sativa (Rice)moderately similar to ( 213) loc\_os01g37110 12001.m10006 protein protein ABIL1, putative, expressed seq=cds; coord=3:226872828..226873698:1; parent\_gene=GRMZM2G001981'

'highly similar to ( 764) AT3G55200 | Symbols: | splicing factor, putative | chr3:20460533-20464361 FORWARDhighly similar to ( 842) loc\_os02g04480 12002.m05797 protein splicing factor 3B subunit 3, putative, expressed seq=cds; coord=3:229845805..229849321:1; parent\_gene=GRMZM2G078592'

'very weakly similar to (99.0) loc\_os02g34630 12002.m100229 protein myb-like DNA-binding domain containing protein, expressed seq=cds; coord=4:115295668..115296003:-1; parent\_gene=GRMZM2G059167'

'very weakly similar to (99.0) loc\_os02g34630 12002.m100229 protein myb-like DNA-binding domain containing protein, expressed seq=cds; coord=4:115295668..115296003:-1; parent\_gene=GRMZM2G059167'

'highly similar to ( 775) AT3G51460 | Symbols: RHD4 | RHD4 (ROOT HAIR DEFECTIVE4); phosphatidylinositol-4,5-bisphosphate 5-phosphatase/ phosphatidylinositol-4-phosphate phosphatase | chr3:19093007-19097142 FORWARDnearly identical (1032) loc\_os02g34884 12002.m08576 protein recessive suppressor of secretory defect, putative, expressed seq=cds; coord=4:116432507..116450657:-1; parent\_gene=GRMZM2G171080'

'highly similar to ( 775) AT3G51460 | Symbols: RHD4 | RHD4 (ROOT HAIR DEFECTIVE4); phosphatidylinositol-4,5-bisphosphate 5-phosphatase/ phosphatidylinositol-4-phosphate phosphatase | chr3:19093007-19097142 FORWARDnearly identical (1032) loc\_os02g34884 12002.m08576 protein recessive suppressor of secretory defect, putative, expressed seq=cds; coord=4:116432507..116450657:-1; parent\_gene=GRMZM2G171080'

'moderately similar to ( 251) AT5G64930 | Symbols: CPR5, HYS1 | CPR5 (CONSTITUTIVE EXPRESSION OF PR GENES 5) | chr5:25945885-25948321 REVERSEhighly similar to ( 576) loc\_os02g53070 12002.m10337 protein HYS1, putative, expressed seq=cds; coord=4:178037799..178042552:1; parent\_gene=GRMZM2G158811'

'moderately similar to ( 481) AT2G03220 | Symbols: FT1, ATFUT1, ATFT1, MUR2 | FT1 (FUCOSYLTRANSFERASE 1); fucosyltransferase/ transferase, transferring glycosyl groups | chr2:970401-972353 REVERSEmoderately similar to ( 473) FUT1\_PEA Galactoside 2-alpha-L-fucosyltransferase (EC 2.4.1.69) (Xyloglucan alpha-(1,2)-fucosyltransferase) (PsFT1) - Pisum sativum (Garden pea)highly similar to ( 840) loc\_os02g52560 12002.m10287 protein galactoside 2-alpha-L-fucosyltransferase, putative, expressed seq=cds; coord=4:178671950..178675419:1; parent\_gene=GRMZM2G015983'

'highly similar to ( 555) AT5G09360 | Symbols: LAC14 | LAC14 (laccase 14); laccase | chr5:2906426-2908658 REVERSEmoderately similar to ( 207) ASO\_CUCMA L-ascorbate oxidase precursor (EC 1.10.3.3) (Ascorbase) (ASO) - Cucurbita maxima (Pumpkin) (Winter squash)highly similar to ( 750) loc\_os02g51440 12002.m10178 protein laccase, putative seq=cds; coord=4:181527348..181530838:1; parent\_gene=GRMZM2G169033'

'highly similar to ( 555) AT5G09360 | Symbols: LAC14 | LAC14 (laccase 14); laccase | chr5:2906426-2908658 REVERSEmoderately similar to ( 207) ASO\_CUCMA L-ascorbate oxidase precursor (EC 1.10.3.3) (Ascorbase) (ASO) - Cucurbita maxima (Pumpkin) (Winter squash)highly similar to ( 750) loc\_os02g51440 12002.m10178 protein laccase, putative seq=cds; coord=4:181527348..181530838:1; parent\_gene=GRMZM2G169033'

'weakly similar to ( 147) AT5G55140 | Symbols: | ribosomal protein L30 family protein | chr5:22381370-22381787 FORWARDweakly similar to ( 187) loc\_os08g01859 12008.m80294 protein structural constituent of ribosome, putative, expressed seq=cds; coord=5:2186824..2188668:-1; parent\_gene=GRMZM2G085336'

'weakly similar to ( 147) AT5G55140 | Symbols: | ribosomal protein L30 family protein | chr5:22381370-22381787 FORWARDweakly similar to ( 187) loc\_os08g01859 12008.m80294 protein structural constituent of ribosome, putative, expressed seq=cds; coord=5:2186824..2188668:-1; parent\_gene=GRMZM2G085336'

'highly similar to ( 600) AT4G36195 | Symbols: | serine carboxypeptidase S28 family protein | chr4:17127202-17129787 FORWARDhighly similar to ( 748) loc\_os10g36780 12010.m06484 protein prolyl carboxypeptidase like protein, putative, expressed seq=cds; coord=5:22758895..22762980:-1; parent\_gene=GRMZM2G082502'

'weakly similar to ( 197) AT3G51000 | Symbols: | epoxide hydrolase, putative | chr3:18945258-18946499 REVERSEmoderately similar to ( 457) loc\_os10g35520 12010.m06376 protein epoxide hydrolase 2, putative, expressed seq=cds; coord=5:24616889..24618887:-1; parent\_gene=GRMZM2G032910'

'moderately similar to ( 448) AT1G02050 | Symbols: | chalcone and stilbene synthase family protein | chr1:359164-360441 REVERSEmoderately similar to ( 261) THS1\_VITVI Stilbene synthase 1 (EC 2.3.1.95) (Resveratrol synthase 1) (Trihydroxystilbene synthase 1) (PSV25) - Vitis vinifera (Grape)highly similar to ( 619) loc\_os10g34360 12010.m06262 protein chalcone synthase G, putative, expressed seq=cds; coord=5:26971466..26975726:1; parent\_gene=GRMZM2G477683'

'weakly similar to ( 123) AT1G56120 | Symbols: | kinase | chr1:20987288-20993072 REVERSEmoderately similar to ( 243) loc\_os11g28104 12011.m06728 protein protein kinase, putative, expressed seq=cds; coord=5:27198279..27204222:-1; parent\_gene=GRMZM2G102862'

'moderately similar to ( 419) AT1G70090 | Symbols: GATL9, LGT8 | LGT8 (GLUCOSYL TRANSFERASE FAMILY 8); polygalacturonate 4-alpha-galacturonosyltransferase/ transferase, transferring glycosyl groups / transferase, transferring hexosyl groups | chr1:26400927-26402099 FORWARDhighly similar to ( 596) loc\_os02g50600 12002.m10094 protein transferase, transferring glycosyl groups, putative, expressed seq=cds; coord=5:205746626..205748479:-1; parent\_gene=GRMZM2G142709'

'moderately similar to ( 407) AT4G39770 | Symbols: | trehalose-6-phosphate phosphatase, putative | chr4:18449138-18451218 REVERSEhighly similar to ( 521) loc\_os02g51680 12002.m10199 protein expressed protein seq=cds; coord=5:208172385..208174899:1; parent\_gene=GRMZM2G055150'

'moderately similar to ( 288) AT4G08950 | Symbols: EXO | EXO (EXORDIUM) | chr4:5740378-5741322 FORWARDmoderately similar to ( 407) loc\_os02g52200 12002.m10231 protein phi-1-like phosphate-induced protein, putative, expressed seq=cds; coord=5:208637277..208638686:-1; parent\_gene=GRMZM2G081214'

'very weakly similar to (92.0) AT4G38100 | Symbols: | unknown protein | chr4:17887033-17888177 REVERSEmoderately similar to ( 219) loc\_os02g52260 12002.m10257 protein threonine endopeptidase, putative, expressed seq=cds; coord=5:209141850..209147166:1; parent\_gene=GRMZM2G371795'

'weakly similar to ( 190) AT4G30350 | Symbols: | heat shock protein-related | chr4:14848031-14850973 FORWARDhighly similar to ( 884) loc\_os02g54720 12002.m10500 protein expressed protein seq=cds; coord=5:212817973..212821590:-1; parent\_gene=GRMZM2G040890'

'weakly similar to ( 130) loc\_os03g62379 12003.m11114 protein DNA binding protein, putative, expressed seq=cds; coord=6:6015317..6016569:1; parent\_gene=GRMZM2G019257'

'moderately similar to ( 318) AT2G03340 | Symbols: WRKY3 | WRKY3; transcription factor | chr2:1014724-1016936 REVERSEhighly similar to ( 637) loc\_os12g32250 12012.m07031 protein SPF1-like DNA-binding protein, putative, expressed seq=cds; coord=6:22907900..22912535:1; parent\_gene=GRMZM2G143765'

'very weakly similar to (85.9) AT5G61330 | Symbols: | rRNA processing protein-related | chr5:24657287-24660103 REVERSEweakly similar to ( 115) loc\_os01g34200 12001.m43037 protein AATF, putative, expressed seq=cds; coord=6:28075395..28081870:1; parent\_gene=GRMZM2G465617'

'weakly similar to ( 149) AT4G35160 | Symbols: | O-methyltransferase family 2 protein | chr4:16730989-16732808 REVERSEmoderately similar to ( 225) ZRP4\_MAIZE O-methyltransferase ZRP4 (EC 2.1.1.-) (OMT) - Zea mays (Maize)moderately similar to ( 311) loc\_os07g28040 12007.m07076 protein O-methyltransferase ZRP4, putative, expressed seq=cds; coord=7:44803178..44815872:-1; parent\_gene=GRMZM2G177424'

'weakly similar to ( 116) AT4G39740 | Symbols: | electron transport SCO1/SenC family protein | chr4:18435586-18437095 REVERSEweakly similar to ( 138) loc\_os09g20430 12009.m22074 protein SCO1 protein homolog, mitochondrial precursor, putative, expressed seq=cds; coord=7:100475067..100477058:-1; parent\_gene=GRMZM2G126408'

'highly similar to ( 631) AT2G19130 | Symbols: | S-locus lectin protein kinase family protein | chr2:8293789-8296275 FORWARDmoderately similar to ( 238) KPRO\_MAIZE Putative receptor protein kinase ZmPK1 precursor (EC 2.7.11.1) - Zea mays (Maize)nearly identical (1115) loc\_os04g34370 12004.m08531 protein serine/threonine-protein kinase receptor precursor, putative, expressed seq=cds; coord=7:148487644..148490458:1; parent\_gene=GRMZM2G413030'

'very weakly similar to (89.4) AT2G41790 | Symbols: | peptidase M16 family protein / insulinase family protein | chr2:17429453-17436110 REVERSEweakly similar to ( 119) loc\_os07g38270 12007.m08074 protein insulin-degrading enzyme, putative, expressed seq=cds; coord=7:159033700..159034362:-1; parent\_gene=AC197013.3\_FG003'

'moderately similar to ( 337) AT2G37270 | Symbols: ATRPS5B | ATRPS5B (RIBOSOMAL PROTEIN 5B); structural constituent of ribosome | chr2:15647883-15649042 REVERSEmoderately similar to ( 336) RS5\_CICAR 40S ribosomal protein S5 (Fragment) - Cicer arietinum (Chickpea) (Garbanzo)moderately similar to ( 358) loc\_os11g29190 12011.m080000 protein 40S ribosomal protein S5, putative, expressed seq=cds; coord=8:6590983..6592937:1; parent\_gene=GRMZM2G156673'

'moderately similar to ( 337) AT2G37270 | Symbols: ATRPS5B | ATRPS5B (RIBOSOMAL PROTEIN 5B); structural constituent of ribosome | chr2:15647883-15649042 REVERSEmoderately similar to ( 336) RS5\_CICAR 40S ribosomal protein S5 (Fragment) - Cicer arietinum (Chickpea) (Garbanzo)moderately similar to ( 358) loc\_os11g29190 12011.m080000 protein 40S ribosomal protein S5, putative, expressed seq=cds; coord=8:6590983..6592937:1; parent\_gene=GRMZM2G156673'

'moderately similar to ( 248) AT4G39220 | Symbols: ATRER1A | ATRER1A | chr4:18264280-18265531 FORWARDmoderately similar to ( 307) loc\_os01g01640 12001.m06808 protein RER1A protein, putative, expressed seq=cds; coord=8:7616848..7621407:1; parent\_gene=GRMZM2G078941'

'moderately similar to ( 256) AT5G09330 | Symbols: | anac082 (Arabidopsis NAC domain containing protein 82); transcription factor | chr5:2892623-2894708 REVERSEweakly similar to ( 190) NAC74\_ORYSA NAC domain-containing protein 74 (ONAC074) - Oryza sativa (Rice)moderately similar to ( 437) loc\_os05g35170 12005.m27832 protein NAC domain-containing protein 78, putative, expressed seq=cds; coord=8:102534750..102538745:-1; parent\_gene=GRMZM2G104400'

'moderately similar to ( 226) AT3G14470 | Symbols: | disease resistance protein (NBS-LRR class), putative | chr3:4857940-4861104 FORWARDhighly similar to ( 738) loc\_os05g34230 12005.m07654 protein disease resistance protein RGA3, putative, expressed seq=cds; coord=8:104379532..104382273:1; parent\_gene=GRMZM2G017603'

'moderately similar to ( 313) AT2G38470 | Symbols: WRKY33, ATWRKY33 | WRKY33; transcription factor | chr2:16108476-16110539 FORWARDmoderately similar to ( 484) loc\_os05g27730 12005.m07061 protein OsWRKY53 - Superfamily of rice TFs having WRKY and zinc finger domains, expressed seq=cds; coord=8:110214059..110216431:-1; parent\_gene=GRMZM2G449681'

'moderately similar to ( 295) AT1G21240 | Symbols: WAK3 | WAK3 (wall associated kinase 3); kinase/ protein serine/threonine kinase | chr1:7434303-7436702 FORWARDweakly similar to ( 177) CRI4\_MAIZE Putative receptor protein kinase CRINKLY4 precursor (EC 2.7.11.1) - Zea mays (Maize)moderately similar to ( 484) loc\_os08g39210 12008.m07902 protein OsWAK74 - OsWAK receptor-like protein kinase, expressed seq=cds; coord=8:112624757..112626912:1; parent\_gene=GRMZM2G061718'

'weakly similar to ( 115) AT2G45050 | Symbols: | zinc finger (GATA type) family protein | chr2:18582958-18583845 FORWARDweakly similar to ( 153) loc\_os03g05160 12003.m06040 protein GATA zinc finger family protein, expressed seq=cds; coord=9:152266750..152271833:1; parent\_gene=GRMZM2G532534'

'weakly similar to ( 189) AT1G25550 | Symbols: | myb family transcription factor | chr1:8976644-8977942 FORWARDmoderately similar to ( 290) loc\_os02g22020 12002.m07440 protein DNA binding protein, putative, expressed seq=cds; coord=10:5384582..5386647:1; parent\_gene=GRMZM2G016370'

'moderately similar to ( 493) AT2G27690 | Symbols: CYP94C1 | CYP94C1; fatty acid (omega-1)-hydroxylase/ oxygen binding | chr2:11809373-11810860 FORWARDvery weakly similar to (92.4) C97B2\_SOYBN Cytochrome P450 97B2 (EC 1.14.-.-) - Glycine max (Soybean)highly similar to ( 736) loc\_os11g05380 12011.m04735 protein cytochrome P450 94A2, putative, expressed seq=cds; coord=10:5398299..5400462:1; parent\_gene=GRMZM2G016264'

'moderately similar to ( 374) AT1G24360 | Symbols: | 3-oxoacyl-(acyl-carrier protein) reductase, chloroplast / 3-ketoacyl-acyl carrier protein reductase | chr1:8640820-8643283 FORWARDmoderately similar to ( 397) FABG3\_BRANA 3-oxoacyl-[acyl-carrier-protein] reductase 3, chloroplast precursor (EC 1.1.1.100) (3-ketoacyl-acyl carrier protein reductase 3) - Brassica napus (Rape)moderately similar to ( 476) loc\_os04g30760 12004.m08180 protein 3-oxoacyl-reductase, chloroplast precursor, putative, expressed seq=cds; coord=10:108122298..108130104:1; parent\_gene=GRMZM2G099696'

'highly similar to ( 610) AT4G39910 | Symbols: ATUBP3, UBP3 | ATUBP3 (ARABIDOPSIS THALIANA UBIQUITIN-SPECIFIC PROTEASE 3); ubiquitin-specific protease | chr4:18511858-18514139 REVERSEhighly similar to ( 703) loc\_os04g37950 12004.m08784 protein ubiquitin carboxyl-terminal hydrolase 4, putative, expressed seq=cds; coord=10:121505257..121515372:-1; parent\_gene=GRMZM2G036186'

'moderately similar to ( 394) AT4G23180 | Symbols: CRK10, RLK4 | CRK10 (CYSTEINE-RICH RLK10); ATP binding / kinase/ protein kinase/ protein serine/threonine kinase/ protein tyrosine kinase | chr4:12138171-12140780 FORWARDmoderately similar to ( 203) PSKR\_DAUCA Phytosulfokine receptor precursor (EC 2.7.11.1) (Phytosulfokine LRR receptor kinase) - Daucus carota (Carrot)highly similar to ( 523) loc\_os04g53994 12004.m10292 protein ATP binding protein, putative, expressed seq=cds; coord=10:144138641..144143208:-1; parent\_gene=GRMZM2G000633'

'highly similar to ( 641) AT4G21380 | Symbols: ARK3 | ARK3 (A. THALIANA RECEPTOR KINASE 3); kinase/ transmembrane receptor protein serine/threonine kinase | chr4:11389219-11393090 REVERSEmoderately similar to ( 299) SLSG6\_BRAOL S-locus-specific glycoprotein S6 precursor (SLSG-6) - Brassica oleracea (Wild cabbage)nearly identical (1018) loc\_os04g54070 12004.m10299 protein receptor-like kinase, putative, expressed seq=cds; coord=10:144143811..144147098:1; parent\_gene=GRMZM2G000620'

'very weakly similar to (92.0) AT5G20900 | Symbols: JAZ12, TIFY3B | JAZ12 (JASMONATE-ZIM-DOMAIN PROTEIN 12) | chr5:7090883-7092201 FORWARDweakly similar to ( 183) loc\_os04g55920 12004.m35599 protein ZIM motif family protein, expressed seq=cds; coord=10:145933966..145937989:1; parent\_gene=GRMZM2G143402'

'very weakly similar to (82.0) AT5G25190 | Symbols: | ethylene-responsive element-binding protein, putative | chr5:8707007-8707655 REVERSEweakly similar to ( 105) loc\_os04g56150 12004.m10506 protein ethylene-responsive transcription factor 4, putative seq=cds; coord=10:146118823..146119727:1; parent\_gene=GRMZM2G104260'

'highly similar to ( 765) AT5G20990 | Symbols: B73, SIR4, CNX, CHL6, CNX1 | B73; molybdenum ion binding | chr5:7128737-7133397 REVERSEhighly similar to ( 696) loc\_os04g56620 12004.m101683 protein molybdopterin biosynthesis CNX1 protein, putative, expressed seq=cds; coord=10:146668953..146673272:1; parent\_gene=GRMZM2G067176'

'weakly similar to ( 120) AT1G78690 | Symbols: | phospholipid/glycerol acyltransferase family protein | chr1:29597002-29598409 FORWARDweakly similar to ( 161) loc\_os04g57150 12004.m35502 protein tafazzin, putative, expressed seq=cds; coord=10:147206883..147213776:-1; parent\_gene=GRMZM2G125083'

'weakly similar to ( 139) AT3G10620 | Symbols: ATNUDX26 | ATNUDX26 (ARABIDOPSIS THALIANA NUDIX HYDROLASE HOMOLOG 26); bis(5'-adenosyl)-pentaphosphatase/ bis(5'-nucleosyl)-tetraphosphatase (asymmetrical) | chr3:3320263-3321565 FORWARDweakly similar to ( 182) loc\_os04g58900 12004.m10770 protein expressed protein seq=cds; coord=10:148870139..148873900:1; parent\_gene=GRMZM2G001905'

'weakly similar to ( 105) AT1G26945 | Symbols: KDR | KDR (KIDARI); transcription regulator | chr1:9351571-9352474 FORWARDweakly similar to ( 122) loc\_os10g26460 12010.m05586 protein DNA binding protein, putative seq=cds; coord=1:15133983..15136082:-1; parent\_gene=GRMZM2G035156'

'very weakly similar to (91.7) AT5G10510 | Symbols: AIL6 | AIL6 (AINTEGUMENTA-LIKE 6); DNA binding / transcription factor | chr5:3315991-3320008 FORWARDvery weakly similar to (87.8) BBM2\_BRANA Protein BABY BOOM 2 (BnBBM2) - Brassica napus (Rape)weakly similar to ( 194) loc\_os03g07940 12003.m06305 protein AINTEGUMENTA-like protein, putative, expressed seq=cds; coord=1:16118862..16123188:-1; parent\_gene=GRMZM2G399072'

'very weakly similar to (91.7) AT5G10510 | Symbols: AIL6 | AIL6 (AINTEGUMENTA-LIKE 6); DNA binding / transcription factor | chr5:3315991-3320008 FORWARDvery weakly similar to (87.8) BBM2\_BRANA Protein BABY BOOM 2 (BnBBM2) - Brassica napus (Rape)weakly similar to ( 194) loc\_os03g07940 12003.m06305 protein AINTEGUMENTA-like protein, putative, expressed seq=cds; coord=1:16118862..16123188:-1; parent\_gene=GRMZM2G399072'

'weakly similar to ( 141) AT2G45430 | Symbols: | DNA-binding protein-related | chr2:18727848-18728801 FORWARDmoderately similar to ( 258) loc\_os03g16350 12003.m07070 protein DNA-binding protein, putative, expressed seq=cds; coord=1:39332349..39333847:1; parent\_gene=GRMZM2G119168'

'highly similar to ( 521) AT2G37650 | Symbols: | scarecrow-like transcription factor 9 (SCL9) | chr2:15792623-15794779 FORWARDmoderately similar to ( 218) CIGR2\_ORYSA Chitin-inducible gibberellin-responsive protein 2 - Oryza sativa (Rice)nearly identical (1152) loc\_os03g48450 12003.m101444 protein DELLA protein RGL1, putative, expressed seq=cds; coord=1:40139023..40143020:-1; parent\_gene=GRMZM2G049159'

'highly similar to ( 524) AT2G44830 | Symbols: | protein kinase, putative | chr2:18490398-18492779 FORWARDhighly similar to ( 501) G11A\_ORYSA Protein kinase G11A (EC 2.7.11.1) - Oryza sativa (Rice)highly similar to ( 769) loc\_os10g41290 12010.m06893 protein protein kinase PVPK-1, putative, expressed seq=cds; coord=1:93908134..93911493:-1; parent\_gene=GRMZM2G392477'

'moderately similar to ( 404) AT5G38710 | Symbols: | proline oxidase, putative / osmotic stress-responsive proline dehydrogenase, putative | chr5:15501340-15503899 FORWARDhighly similar to ( 640) loc\_os10g40360 12010.m06805 protein proline oxidase, mitochondrial precursor, putative, expressed seq=cds; coord=1:88340098..88342761:1; parent\_gene=GRMZM2G053720'

'moderately similar to ( 347) AT3G53230 | Symbols: | cell division cycle protein 48, putative / CDC48, putative | chr3:19723416-19726489 FORWARDmoderately similar to ( 345) CDC48\_SOYBN Cell division cycle protein 48 homolog (Valosin-containing protein homolog) (VCP) - Glycine max (Soybean)moderately similar to ( 351) loc\_os10g30580 12010.m65393 protein cell division control protein 48 homolog E, putative, expressed seq=cds; coord=1:210639997..210645759:1; parent\_gene=GRMZM2G128605'

'nearly identical (1109) AT5G58140 | Symbols: PHOT2, NPL1 | PHOT2 (PHOTOTROPIN 2); FMN binding / blue light photoreceptor/ kinase/ protein serine/threonine kinase | chr5:23524771-23529993 FORWARDmoderately similar to ( 335) KPK1\_PHAVU Protein kinase PVPK-1 (EC 2.7.11.1) - Phaseolus vulgaris (Kidney bean) (French bean)nearly identical (1347) loc\_os04g23890 12004.m35267 protein phototropin-1, putative, expressed seq=cds; coord=1:220307458..220339987:-1; parent\_gene=GRMZM2G032351'

'nearly identical (1109) AT5G58140 | Symbols: PHOT2, NPL1 | PHOT2 (PHOTOTROPIN 2); FMN binding / blue light photoreceptor/ kinase/ protein serine/threonine kinase | chr5:23524771-23529993 FORWARDmoderately similar to ( 335) KPK1\_PHAVU Protein kinase PVPK-1 (EC 2.7.11.1) - Phaseolus vulgaris (Kidney bean) (French bean)nearly identical (1347) loc\_os04g23890 12004.m35267 protein phototropin-1, putative, expressed seq=cds; coord=1:220307458..220339987:-1; parent\_gene=GRMZM2G032351'

'moderately similar to ( 347) AT2G46620 | Symbols: | AAA-type ATPase family protein | chr2:19139071-19140546 REVERSEhighly similar to ( 650) loc\_os10g37500 12010.m06538 protein ATP binding protein, putative, expressed seq=cds; coord=1:222980062..222981812:1; parent\_gene=GRMZM2G170982'

'weakly similar to ( 152) loc\_os03g60560 12003.m10945 protein ZFP16-2, putative, expressed seq=cds; coord=1:293154769..293155800:1; parent\_gene=GRMZM2G061626'

'moderately similar to ( 267) AT4G10020 | Symbols: AtHSD5 | AtHSD5 (hydroxysteroid dehydrogenase 5); binding / catalytic/ oxidoreductase | chr4:6268363-6270179 FORWARDmoderately similar to ( 306) loc\_os03g62590 12003.m11136 protein expressed protein seq=cds; coord=1:296961161..296962159:-1; parent\_gene=AC217358.3\_FG007'

'highly similar to ( 934) AT2G02220 | Symbols: ATPSKR1, PSKR1 | PSKR1 (PHYTOSULFOKIN RECEPTOR 1); ATP binding / peptide receptor/ protein serine/threonine kinase | chr2:584098-587124 REVERSEhighly similar to ( 910) PSKR\_DAUCA Phytosulfokine receptor precursor (EC 2.7.11.1) (Phytosulfokine LRR receptor kinase) - Daucus carota (Carrot)nearly identical (1459) loc\_os04g57630 12004.m10648 protein phytosulfokine receptor precursor, putative, expressed seq=cds; coord=2:2222100..2225911:1; parent\_gene=GRMZM2G452142'

'moderately similar to ( 377) AT4G22260 | Symbols: IM, IM1 | IM (IMMUTANS); alternative oxidase | chr4:11769967 11772350 REVERSEmoderately similar to ( 456) loc\_os04g57320 12004.m79006 protein immutans protein, putative, expressed seq=cds; coord=2:2681445..2685261:1; parent\_gene=GRMZM2G010555'

'weakly similar to ( 197) AT5G05450 | Symbols: | DEAD/DEAH box helicase, putative (RH18) | chr5:1612077-1615195 FORWARDvery weakly similar to (94.0) PMGI\_MAIZE 2,3-bisphosphoglycerate-independent phosphoglycerate mutase (EC 5.4.2.1) (Phosphoglyceromutase) (BPG-independent PGAM) (PGAM-I) - Zea mays (Maize)moderately similar to ( 254) loc\_os01g07080 12001.m42877 protein ATP-dependent rRNA helicase spb4, putative, expressed seq=cds; coord=2:4320523..4326308:1; parent\_gene=GRMZM2G314171'

'weakly similar to ( 187) AT1G68290 | Symbols: ENDO 2 | ENDO 2 (endonuclease 2); T/G mismatch-specific endonuclease/ endonuclease/ nucleic acid binding / single-stranded DNA specific endodeoxyribonuclease | chr1:25596718-25598264 FORWARDmoderately similar to ( 300) loc\_os04g55850 12004.m35489 protein nuclease PA3, putative, expressed seq=cds; coord=2:4847231..4848890:-1; parent\_gene=GRMZM2G032977'

'moderately similar to ( 325) AT5G67240 | Symbols: SDN3 | SDN3 (SMALL RNA DEGRADING NUCLEASE 3); exonuclease/ nucleic acid binding | chr5:26824454-26828098 REVERSEhighly similar to ( 638) loc\_os04g55700 12004.m10461 protein exonuclease, putative, expressed seq=cds; coord=2:5082653..5098185:1; parent\_gene=GRMZM2G082097'



'moderately similar to ( 325) AT5G67240 | Symbols: SDN3 | SDN3 (SMALL RNA DEGRADING NUCLEASE 3); exonuclease/ nucleic acid binding | chr5:26824454-26828098 REVERSEhighly similar to ( 638) loc\_os04g55700 12004.m10461 protein exonuclease, putative, expressed seq=cds; coord=2:5082653..5098185:1; parent\_gene=GRMZM2G082097'

'moderately similar to ( 244) AT4G34040 | Symbols: | zinc finger (C3HC4-type RING finger) family protein | chr4:16304638-16307503 REVERSEhighly similar to ( 936) loc\_os04g55510 12004.m10442 protein zinc finger, C3HC4 type family protein, expressed seq=cds; coord=2:5566610..5573059:-1; parent\_gene=GRMZM2G174926'

'nearly identical (1211) AT2G42490 | Symbols: | copper amine oxidase, putative | chr2:17691600-17695526 REVERSEmoderately similar to ( 231) AMO\_PEA Amine oxidase [copper-containing] precursor (EC 1.4.3.6) - Pisum sativum (Garden pea)nearly identical (1355) loc\_os04g40040 12004.m08988 protein copper methylamine oxidase precursor, putative, expressed seq=cds; coord=2:38132179..38142127:1; parent\_gene=GRMZM2G147884'

'weakly similar to ( 146) loc\_os12g06550 12012.m04645 protein expressed protein seq=cds; coord=2:53196865..53198964:-1; parent\_gene=GRMZM2G014905'

'moderately similar to ( 462) AT4G32640 | Symbols: | protein binding / zinc ion binding | chr4:15742661-15750424 FORWARDhighly similar to ( 598) loc\_os11g29200 12011.m06831 protein protein transport protein Sec24-like CEF, putative, expressed seq=cds; coord=2:124094006..124108029:-1; parent\_gene=GRMZM2G075680'

'highly similar to ( 653) AT1G76490 | Symbols: HMG1, HMGR1 | HMG1 (HYDROXY METHYLGLUTARYL COA REDUCTASE 1); hydroxymethylglutaryl-CoA reductase | chr1:28695801-28698206 FORWARDhighly similar to ( 746) HMDH\_MAIZE 3-hydroxy-3-methylglutaryl-coenzyme A reductase (EC 1.1.1.34) (HMG-CoA reductase) - Zea mays (Maize)highly similar to ( 775) loc\_os09g31970 12009.m06287 protein 3-hydroxy-3-methylglutaryl-coenzyme A reductase 3, putative, expressed seq=cds; coord=2:190414780..190419336:1; parent\_gene=GRMZM2G058095'

'weakly similar to ( 159) AT1G68920 | Symbols: | basic helix-loop-helix (bHLH) family protein | chr1:25915620-25917675 FORWARDmoderately similar to ( 244) loc\_os09g32510 12009.m22151 protein BHLH transcription factor, putative, expressed seq=cds; coord=2:191378248..191380925:-1; parent\_gene=GRMZM2G083504'

'very weakly similar to (81.3) AT1G32640 | Symbols: ATMYC2, RD22BP1, JAI1, JIN1, MYC2, ZBF1 | MYC2; DNA binding / transcription activator/ transcription factor | chr1:11799042-11800913 REVERSEmoderately similar to ( 204) loc\_os09g34330 12009.m06482 protein transcription factor AtMYC2, putative seq=cds; coord=2:193882051..193882939:-1; parent\_gene=GRMZM2G107560'

'very weakly similar to (81.3) AT1G32640 | Symbols: ATMYC2, RD22BP1, JAI1, JIN1, MYC2, ZBF1 | MYC2; DNA binding / transcription activator/ transcription factor | chr1:11799042-11800913 REVERSEmoderately similar to ( 204) loc\_os09g34330 12009.m06482 protein transcription factor AtMYC2, putative seq=cds; coord=2:193882051..193882939:-1; parent\_gene=GRMZM2G107560'

'weakly similar to ( 176) AT5G66840 | Symbols: | SAP domain-containing protein | chr5:26692922-26695296 REVERSEmoderately similar to ( 378) loc\_os07g42760 12007.m08506 protein expressed protein seq=cds; coord=2:211726329..211731892:-1; parent\_gene=GRMZM2G056564'

'highly similar to ( 506) AT5G38560 | Symbols: | protein kinase family protein | chr5:15439844-15443007  
FORWARDmoderately similar to ( 252) PSKR\_DAUCA Phytosulfokine receptor precursor (EC 2.7.11.1)  
(Phytosulfokine LRR receptor kinase) - Daucus carota (Carrot)highly similar to ( 707) loc\_os01g02040 12001.m42834  
protein ATP binding protein, putative, expressed seq=cds; coord=3:29009912..29013884:-1;  
parent\_gene=GRMZM2G355636'

'moderately similar to ( 303) AT3G16520 | Symbols: UGT88A1 | UDP-glucuronosyl/UDP-glucosyl transferase family  
protein | chr3:5618847-5620833 REVERSEweakly similar to ( 153) UFO3\_MAIZE Anthocyanidin 3-O-  
glucosyltransferase (EC 2.4.1.115) (Flavonol 3-O-glucosyltransferase) (UDP-glucose flavonoid 3-O-  
glucosyltransferase) (Bronze-1) (Bz-W22 allele) - Zea mays (Maize)moderately similar to ( 466) loc\_os01g53330  
12001.m11501 protein anthocyanidin 5,3-O-glucosyltransferase, putative, expressed seq=cds;  
coord=3:114351464..114353544:-1; parent\_gene=GRMZM2G105991'

'moderately similar to ( 431) AT1G68690 | Symbols: | ATP binding / protein kinase/ protein serine/threonine kinase |  
chr1:25789192-25791886 FORWARDmoderately similar to ( 210) PSKR\_DAUCA Phytosulfokine receptor precursor  
(EC 2.7.11.1) (Phytosulfokine LRR receptor kinase) - Daucus carota (Carrot)highly similar to ( 704) loc\_os01g53640  
12001.m11530 protein ATP binding protein, putative, expressed seq=cds; coord=3:199853295..199856980:-1;  
parent\_gene=AC211175.3\_FG005'

'weakly similar to ( 152) AT1G20980 | Symbols: SPL14, FBR6, SPL1R2, ATSPL14 | SPL14 (squamosa promoter  
binding protein-like 14); DNA binding / transcription activator/ transcription factor | chr1:7325042-7328933  
FORWARDvery weakly similar to (81.6) VATB2\_HORVU Vacuolar ATP synthase subunit B isoform 2 (EC 3.6.3.14)  
(V-ATPase B subunit 2) (Vacuolar proton pump B subunit 2) - Hordeum vulgare (Barley)moderately similar to ( 261)  
loc\_os08g40260 12008.m08006 protein squamosa promoter-binding-like protein 16, putative, expressed seq=cds;  
coord=3:202509079..202513794:-1; parent\_gene=GRMZM2G387993'

'moderately similar to ( 483) AT5G19580 | Symbols: | glyoxal oxidase-related | chr5:6607595-6609517  
REVERSEhighly similar to ( 879) loc\_os01g48540 12001.m11044 protein glyoxal oxidase, putative, expressed  
seq=cds; coord=3:209027465..209030003:-1; parent\_gene=GRMZM2G164674'

'moderately similar to ( 345) AT1G34300 | Symbols: | lectin protein kinase family protein | chr1:12503450-12505939  
FORWARDhighly similar to ( 633) KPRO\_MAIZE Putative receptor protein kinase ZmPK1 precursor (EC 2.7.11.1) -  
Zea mays (Maize)nearly identical (1279) loc\_os01g47820 12001.m10975 protein S-locus-like receptor protein kinase,  
putative, expressed seq=cds; coord=3:210357435..210360168:1; parent\_gene=GRMZM2G142207'

'moderately similar to ( 345) AT1G34300 | Symbols: | lectin protein kinase family protein | chr1:12503450-12505939  
FORWARDhighly similar to ( 633) KPRO\_MAIZE Putative receptor protein kinase ZmPK1 precursor (EC 2.7.11.1) -  
Zea mays (Maize)nearly identical (1279) loc\_os01g47820 12001.m10975 protein S-locus-like receptor protein kinase,  
putative, expressed seq=cds; coord=3:210357435..210360168:1; parent\_gene=GRMZM2G142207'

'moderately similar to ( 245) AT5G14740 | Symbols: CA2, CA18, BETA CA2 | CA2 (CARBONIC ANHYDRASE 2);  
carbonate dehydratase/ zinc ion binding | chr5:4758257-4762315 FORWARDmoderately similar to ( 340)  
CAHC\_HORVU Carbonic anhydrase, chloroplast precursor (EC 4.2.1.1) (Carbonate dehydratase) - Hordeum vulgare  
(Barley)moderately similar to ( 340) loc\_os01g45274 12001.m150428 protein carbonic anhydrase, chloroplast  
precursor, putative, expressed seq=cds; coord=3:215466579..215473931:-1; parent\_gene=GRMZM2G121878'

'highly similar to ( 515) AT1G60590 | Symbols: | polygalacturonase, putative / pectinase, putative | chr1:22314426-22316867 REVERSEmoderately similar to ( 248) PGLR\_ACTCH Polygalacturonase precursor (EC 3.2.1.15) (PG) (Pectinase) - Actinidia chinensis (Kiwi) (Yangtao)highly similar to ( 734) loc\_os01g44970 12001.m10703 protein polygalacturonase precursor, putative, expressed seq=cds; coord=3:215929238..215932695:-1; parent\_gene=GRMZM2G037431'

'weakly similar to ( 178) AT2G45620 | Symbols: | nucleotidyltransferase family protein | chr2:18792943-18795750 FORWARDmoderately similar to ( 226) loc\_os02g02970 12002.m05647 protein poly, putative, expressed seq=cds; coord=3:215991469..215992380:-1; parent\_gene=GRMZM2G132340'

'weakly similar to ( 111) AT5G45910 | Symbols: | GDSL-motif lipase/hydrolase family protein | chr5:18620420-18622264 REVERSEmoderately similar to ( 221) loc\_os01g42730 12001.m10537 protein alpha-L-fucosidase 2 precursor, putative, expressed seq=cds; coord=3:225122883..225124641:1; parent\_gene=GRMZM2G022279'

'highly similar to ( 692) AT3G23430 | Symbols: PHO1, ATPHO1 | PHO1 (phosphate 1) | chr3:8387818-8393242 REVERSEnearly identical (1109) loc\_os02g56510 12002.m10672 protein phosphate transporter 1, putative, expressed seq=cds; coord=4:171917079..171922792:1; parent\_gene=GRMZM2G466545'

'moderately similar to ( 400) AT5G65685 | Symbols: | soluble glycogen synthase-related | chr5:26273252-26275864 REVERSEweakly similar to ( 189) SSS3\_SOLU Soluble starch synthase 3, chloroplast precursor (EC 2.4.1.21) (SS III) (Soluble starch synthase III) - Solanum tuberosum (Potato)highly similar to ( 907) loc\_os02g56320 12002.m10655 protein glycogen synthase 2, putative, expressed seq=cds; coord=4:172606253..172677186:-1; parent\_gene=GRMZM2G130043'

'moderately similar to ( 444) AT5G10080 | Symbols: | aspartyl protease family protein | chr5:3150843-3153380 FORWARDvery weakly similar to (81.6) ASP1\_ORYSA Aspartic proteinase Asp1 precursor (EC 3.4.23.-) (OsAsp1) (OSAP1) (Nucellin-like protein) - Oryza sativa (Rice)highly similar to ( 753) loc\_os02g51540 12002.m10187 protein pepsin A, putative, expressed seq=cds; coord=4:181338045..181349423:-1; parent\_gene=GRMZM2G098583'

'moderately similar to ( 310) AT3G14160 | Symbols: | oxidoreductase | chr3:4693495-4695198 FORWARDmoderately similar to ( 410) loc\_os03g60190 12003.m10912 protein DNA repair protein, putative, expressed seq=cds; coord=5:2775245..2784967:-1; parent\_gene=GRMZM2G165270'

'weakly similar to ( 139) AT1G04240 | Symbols: SHY2, IAA3 | SHY2 (SHORT HYPOCOTYL 2); transcription factor | chr1:1128564-1129319 REVERSEweakly similar to ( 196) IAA14\_ORYSA Auxin-responsive protein IAA14 (Indoleacetic acid-induced protein 14) - Oryza sativa (Rice)weakly similar to ( 196) loc\_os03g58350 12003.m10745 protein OsIAA14 - Auxin-responsive Aux/IAA gene family member, expressed seq=cds; coord=5:4200507..4201934:-1; parent\_gene=GRMZM2G152796'

'moderately similar to ( 270) AT1G31330 | Symbols: PSFAF | PSFAF (photosystem I subunit F) | chr1:11215011-11215939 REVERSEmoderately similar to ( 305) PSFAF\_HORVU Photosystem I reaction center subunit III, chloroplast precursor (Light-harvesting complex I 17 kDa protein) (PSI-F) - Hordeum vulgare (Barley)moderately similar to ( 307) loc\_os03g56670 12003.m34938 protein photosystem I reaction center subunit III, chloroplast precursor, putative, expressed seq=cds; coord=5:5286657..5288134:1; parent\_gene=GRMZM2G085646'

'moderately similar to ( 224) AT5G01160 | Symbols: | e-cadherin binding protein-related | chr5:54280-55727  
FORWARDhighly similar to ( 594) loc\_os10g35190 12010.m06342 protein expressed protein seq=cds;  
coord=5:25791688..25795830:1; parent\_gene=GRMZM2G120933'

'moderately similar to ( 274) AT1G28590 | Symbols: | lipase, putative | chr1:10047509-10049300 REVERSEweakly  
similar to ( 176) EST\_HEVBR Esterase precursor (EC 3.1.1.-) (Early nodule-specific protein homolog) (Latex allergen  
Hev b 13) - Hevea brasiliensis (Para rubber tree)moderately similar to ( 471) loc\_os10g25400 12010.m05487 protein  
esterase precursor, putative, expressed seq=cds; coord=5:36593492..36595356:1; parent\_gene=GRMZM2G087827'

'moderately similar to ( 437) AT4G04950 | Symbols: | thioredoxin family protein | chr4:2517882-2519924  
REVERSEhighly similar to ( 552) loc\_os10g35720 12010.m22006 protein OsGrx\_S17 - glutaredoxin subgroup II,  
expressed seq=cds; coord=5:160426855..160429034:-1; parent\_gene=GRMZM2G052402'

'weakly similar to ( 162) AT3G62290 | Symbols: ATARFA1E | ATARFA1E (ADP-ribosylation factor A1E); GTP  
binding / phospholipase activator/ protein binding | chr3:23052287-23053545 FORWARDweakly similar to ( 161)  
ARF1\_CHLRE ADP-ribosylation factor 1 - Chlamydomonas reinhardtiiweakly similar to ( 162) loc\_os07g12200  
12007.m05673 protein ADP-ribosylation factor 1, putative, expressed seq=cds; coord=5:197869674..197870822:1;  
parent\_gene=GRMZM2G075253'

'weakly similar to ( 162) AT3G62290 | Symbols: ATARFA1E | ATARFA1E (ADP-ribosylation factor A1E); GTP  
binding / phospholipase activator/ protein binding | chr3:23052287-23053545 FORWARDweakly similar to ( 161)  
ARF1\_CHLRE ADP-ribosylation factor 1 - Chlamydomonas reinhardtiiweakly similar to ( 162) loc\_os07g12200  
12007.m05673 protein ADP-ribosylation factor 1, putative, expressed seq=cds; coord=5:197869674..197870822:1;  
parent\_gene=GRMZM2G075253'

'moderately similar to ( 348) AT2G25620 | Symbols: | protein phosphatase 2C, putative / PP2C, putative |  
chr2:10903154-10904978 REVERSEhighly similar to ( 590) loc\_os02g55560 12002.m100396 protein DNA-binding  
protein phosphatase 2C, putative, expressed seq=cds; coord=5:214089781..214098932:1;  
parent\_gene=GRMZM2G180430'

'highly similar to ( 595) AT3G23340 | Symbols: ckl10 | ckl10 (Casein Kinase I-like 10); ATP binding / kinase/ protein  
kinase/ protein serine/threonine kinase | chr3:8351047-8353791 FORWARDhighly similar to ( 791) loc\_os02g56560  
12002.m77862 protein casein kinase I isoform delta-like, putative, expressed seq=cds;  
coord=5:215017420..215021669:-1; parent\_gene=GRMZM2G150932'

'weakly similar to ( 125) AT3G21260 | Symbols: | glycolipid transfer protein-related | chr3:7464132-7465785  
REVERSEweakly similar to ( 194) loc\_os08g01710 12008.m04319 protein expressed protein seq=cds;  
coord=6:2241302..2243599:-1; parent\_gene=GRMZM2G118378'

'moderately similar to ( 282) AT2G02450 | Symbols: ANAC035 | ANAC035 (Arabidopsis NAC domain containing  
protein 35); transcription factor | chr2:648044-650649 FORWARDweakly similar to ( 172) NAC48\_ORYSA NAC  
domain-containing protein 48 (ONAC048) - Oryza sativa (Rice)moderately similar to ( 355) loc\_os08g02160  
12008.m04362 protein NAC domain-containing protein 68, putative, expressed seq=cds;  
coord=6:3869561..3872846:1; parent\_gene=GRMZM2G030325'

'moderately similar to ( 484) AT3G04120 | Symbols: GAPC, GAPC-1, GAPC1 | GAPC1 (GLYCERALDEHYDE-3-PHOSPHATE DEHYDROGENASE C SUBUNIT 1); glyceraldehyde-3-phosphate dehydrogenase (phosphorylating)/ glyceraldehyde-3-phosphate dehydrogenase | chr3:1081077-1083131 FORWARDhighly similar to ( 557) G3PD\_MAIZE Glyceraldehyde-3-phosphate dehydrogenase, cytosolic 2 (EC 1.2.1.12) - Zea mays (Maize)highly similar to ( 519) loc\_os08g03290 12008.m26460 protein glyceraldehyde-3-phosphate dehydrogenase, cytosolic, putative, expressed seq=cds; coord=6:6898695..6903246:-1; parent\_gene=GRMZM2G180625'

'highly similar to ( 720) AT1G30440 | Symbols: | phototropic-responsive NPH3 family protein | chr1:10759475-10762199 FORWARDmoderately similar to ( 409) NPH3\_ORYSA Coleoptile phototropism protein 1 (Non-phototropic hypocotyl 3-like protein) (NPH3-like protein) - Oryza sativa (Rice)nearly identical (1020) loc\_os08g03650 12008.m04509 protein transposon protein, putative, Mutator sub-class, expressed seq=cds; coord=6:9497117..9501243:-1; parent\_gene=GRMZM2G301803'

'weakly similar to ( 110) AT4G29190 | Symbols: | zinc finger (CCCH-type) family protein | chr4:14392233-14393303 REVERSEmoderately similar to ( 252) loc\_os05g45020 12005.m08627 protein CCCH transcription factor, putative, expressed seq=cds; coord=6:160013893..160016282:1; parent\_gene=GRMZM2G004795'

'highly similar to ( 585) AT5G26680 | Symbols: | endonuclease, putative | chr5:9311882-9315458 REVERSEhighly similar to ( 650) FEN1A\_ORYSA Flap endonuclease 1a (EC 3.1.-.-) (OsFEN-1a) - Oryza sativa (Rice)highly similar to ( 617) loc\_os05g46270 12005.m83948 protein flap endonuclease 1a, putative, expressed seq=cds; coord=6:161720046..161724633:-1; parent\_gene=GRMZM2G121262'

'highly similar to ( 702) AT2G21520 | Symbols: | transporter | chr2:9215956-9218953 FORWARDhighly similar to ( 971) loc\_os05g46720 12005.m27946 protein phosphatidylinositol transfer-like protein III, putative, expressed seq=cds; coord=6:162119858..162125056:1; parent\_gene=GRMZM2G174990'

'weakly similar to ( 174) AT1G13260 | Symbols: RAV1 | RAV1; DNA binding / transcription factor/ transcription repressor | chr1:4542386-4543420 FORWARDmoderately similar to ( 261) loc\_os05g47650 12005.m08837 protein DNA-binding protein RAV1, putative, expressed seq=cds; coord=6:162571228..162572866:1; parent\_gene=GRMZM2G059939'

'nearly identical (3078) AT5G53460 | Symbols: GLT1 | GLT1; glutamate synthase (NADH) | chr5:21700518-21709629 FORWARDnearly identical (3057) GLSN\_MEDSA Glutamate synthase [NADH], chloroplast precursor (EC 1.4.1.14) (NADH-GOGAT) - Medicago sativa (Alfalfa)nearly identical (3311) loc\_os01g48960 12001.m11085 protein glutamate synthase, chloroplast precursor, putative, expressed seq=cds; coord=6:163217461..163229234:1; parent\_gene=GRMZM2G375064'

'moderately similar to ( 368) AT4G18550 | Symbols: | lipase class 3 family protein | chr4:10225006-10226862 REVERSEhighly similar to ( 525) loc\_os05g49830 12005.m09053 protein triacylglycerol lipase, putative, expressed seq=cds; coord=6:165625344..165626546:1; parent\_gene=AC231411.1\_FG011'

'moderately similar to ( 291) AT1G68130 | Symbols: AtIDD14 | AtIDD14 (Arabidopsis thaliana Indeterminate(ID)-Domain 14); nucleic acid binding / transcription factor/ zinc ion binding | chr1:25532843-25534317 FORWARDmoderately similar to ( 319) loc\_os09g27650 12009.m05916 protein zinc finger, C2H2 type family protein, expressed seq=cds; coord=7:124146510..124150019:1; parent\_gene=GRMZM2G141031'

'moderately similar to ( 469) AT3G25110 | Symbols: AtFaTA | AtFaTA (Arabidopsis FatA acyl-ACP thioesterase); acyl carrier/ acyl-[acyl-carrier-protein] hydrolase | chr3:9146589-9148273 REVERSEmoderately similar to ( 239) FATB\_GOSHI Myristoyl-acyl carrier protein thioesterase, chloroplast precursor (EC 3.1.2.-) (16:0-acyl-carrier protein thioesterase) (16:0-ACP thioesterase) (Acyl-[acyl-carrier-protein] hydrolase) (PATE) - Gossypium hirsutum (Upland cotton)highly similar to ( 599) loc\_os09g32760 12009.m060080 protein oleoyl-acyl carrier protein thioesterase, chloroplast precursor, putative, expressed seq=cds; coord=7:136864624..136868251:-1; parent\_gene=GRMZM2G143955'

'moderately similar to ( 281) AT3G14470 | Symbols: | disease resistance protein (NBS-LRR class), putative | chr3:4857940-4861104 FORWARDnearly identical (1321) loc\_os07g29810 12007.m07252 protein plant disease resistant protein, putative seq=cds; coord=7:148700092..148704194:1; parent\_gene=GRMZM2G397557'

'seq=cds; coord=7:151217709..151219397:-1; parent\_gene=GRMZM2G067624'

'moderately similar to ( 280) AT1G76160 | Symbols: sks5 | sks5 (SKU5 Similar 5); copper ion binding / oxidoreductase | chr1:28578211-28581020 REVERSEmoderately similar to ( 215) NTP3\_TOBAC Pollen-specific protein NTP303 precursor - Nicotiana tabacum (Common tobacco)moderately similar to ( 325) loc\_os07g32660 12007.m07529 protein L-ascorbate oxidase homolog precursor, putative, expressed seq=cds; coord=7:152438526..152442219:1; parent\_gene=GRMZM2G076225'

'very weakly similar to (94.7) AT2G29420 | Symbols: ATGSTU7, GST25 | ATGSTU7 (ARABIDOPSIS THALIANA GLUTATHIONE S-TRANSFERASE TAU 7); glutathione transferase | chr2:12618111-12618871 REVERSEweakly similar to ( 120) GSTU6\_ORYSA Probable glutathione S-transferase GSTU6 (EC 2.5.1.18) (28 kDa cold-induced protein) - Oryza sativa (Rice)weakly similar to ( 120) loc\_os10g38740 12010.m06642 protein glutathione S-transferase GSTU6, putative, expressed seq=cds; coord=7:169378558..169379060:1; parent\_gene=GRMZM2G109812'

'nearly identical (1023) AT3G02050 | Symbols: KUP3, ATKUP3, ATKT4 | KUP3 (K

'nearly identical (1023) AT3G02050 | Symbols: KUP3, ATKUP3, ATKT4 | KUP3 (K

'moderately similar to ( 253) AT2G30360 | Symbols: CIPK11, PKSS, SIP4, SNRK3.22 | SIP4 (SOS3-INTERACTING PROTEIN 4); kinase/ protein kinase | chr2:12937265-12938572 REVERSEweakly similar to ( 193) CIPK1\_ORYSA CIPK-like protein 1 (EC 2.7.11.1) (OsCK1) - Oryza sativa (Rice)moderately similar to ( 407) loc\_os07g48090 12007.m09024 protein CBL-interacting serine/threonine-protein kinase 11, putative, expressed seq=cds; coord=7:172879486..172881907:1; parent\_gene=GRMZM2G177050'

'moderately similar to ( 298) AT5G05340 | Symbols: | peroxidase, putative | chr5:1579142-1580819  
REVERSEmoderately similar to ( 325) PER1\_ARAHY Cationic peroxidase 1 precursor (EC 1.11.1.7) (PNPC1) -  
Arachis hypogaea (Peanut)highly similar to ( 525) loc\_os07g48060 12007.m09021 protein cationic peroxidase 1  
precursor, putative, expressed seq=cds; coord=7:172823739..172825501:-1; parent\_gene=GRMZM2G042347'

'highly similar to ( 580) AT2G22250 | Symbols: ATAAT, AAT, MEE17 | aminotransferase class I and II family protein  
| chr2:9458011-9460297 REVERSEhighly similar to ( 725) loc\_os01g65090 12001.m42770 protein aspartate  
aminotransferase, putative, expressed seq=cds; coord=8:101408887..101413622:1; parent\_gene=GRMZM2G033799'

'moderately similar to ( 313) AT2G38470 | Symbols: WRKY33, ATWRKY33 | WRKY33; transcription factor |  
chr2:16108476-16110539 FORWARDmoderately similar to ( 484) loc\_os05g27730 12005.m07061 protein  
OsWRKY53 - Superfamily of rice TFs having WRKY and zinc finger domains, expressed seq=cds;  
coord=8:110214059..110216431:-1; parent\_gene=GRMZM2G449681'

'very weakly similar to (82.4) AT1G04300 | Symbols: | FUNCTIONS IN: molecular\_function unknown; INVOLVED  
IN: biological\_process unknown; EXPRESSED IN: 24 plant structures; EXPRESSED DURING: 15 growth stages;  
CONTAINS InterPro DOMAIN/s: TRAF-like (InterPro:IPR008974), MATH (InterPro:IPR002083); BEST Arabidopsis  
thaliana protein match is: meprin and TRAF homology domain-containing protein / MATH domain-containing protein  
(TAIR:AT5G43560.2); Has 15485 Blast hits to 9800 proteins in 673 species: Archae - 16; Bacteria - 1225; Metazoa -  
5601; Fungi - 1994; Plants - 616; Viruses - 101; Other Eukaryotes - 5932 (source: NCBI BLINK). | chr1:1148818-  
1153895 REVERSEhighly similar to ( 520) loc\_os05g43280 12005.m08456 protein MATH domain containing  
protein, expressed seq=cds; coord=8:122408765..122413891:-1; parent\_gene=GRMZM2G060213'

'moderately similar to ( 426) AT2G29390 | Symbols: ATSMO2 | SMO2-2 (STEROL 4-ALPHA-METHYL-OXIDASE  
2-2); 4-alpha-methyl-delta7-sterol-4alpha-methyl oxidase/ C-4 methylsterol oxidase | chr2:12610758-12611929  
REVERSEhighly similar to ( 503) loc\_os11g48020 12011.m08600 protein C-4 methylsterol oxidase, putative,  
expressed seq=cds; coord=8:156349765..156352110:-1; parent\_gene=GRMZM2G176301'

'highly similar to ( 513) AT1G27340 | Symbols: | F-box family protein | chr1:9495741-9497857 FORWARDhighly  
similar to ( 804) loc\_os01g69940 12001.m13043 protein F-box domain containing protein, expressed seq=cds;  
coord=8:161103602..161107787:1; parent\_gene=GRMZM2G064954'

'moderately similar to ( 367) AT1G21720 | Symbols: PBC1 | PBC1 (PROTEASOME BETA SUBUNIT C1); peptidase/  
threonine-type endopeptidase | chr1:7626394-7628070 FORWARDmoderately similar to ( 391) PSB3\_ORYSA  
Proteasome subunit beta type 3 (EC 3.4.25.1) (20S proteasome alpha subunit C) (20S proteasome subunit beta-3) -  
Oryza sativa (Rice)moderately similar to ( 391) loc\_os06g43570 12006.m08887 protein proteasome subunit beta type  
3, putative, expressed seq=cds; coord=9:94789790..94794492:1; parent\_gene=GRMZM2G092975'

'moderately similar to ( 216) AT2G33620 | Symbols: | DNA-binding family protein / AT-hook protein 1 (AHP1) |  
chr2:14234749-14236563 FORWARDmoderately similar to ( 385) loc\_os10g42230 12010.m50380 protein AT-hook  
protein 1, putative, expressed seq=cds; coord=9:113056029..113059080:1; parent\_gene=AC225193.3\_FG003'

'highly similar to ( 752) AT1G74040 | Symbols: IMS1, MAML-3, IPMS2 | IMS1 (2-ISOPROPYLMALATE SYNTHASE 1); 2-isopropylmalate synthase | chr1:27842258-27845566 FORWARDhighly similar to ( 615) LEU1\_SOYBN Probable 2-isopropylmalate synthase (EC 2.3.3.13) (Alpha-isopropylmalate synthase) (Alpha-IPM synthetase) (Late nodulin 56) (N-56) - Glycine max (Soybean)highly similar to ( 962) loc\_os12g04440 12012.m26829 protein 2-isopropylmalate synthase B, putative, expressed seq=cds; coord=10:1725712..1731899:-1; parent\_gene=GRMZM2G130062'

'very weakly similar to (80.5) AT4G35160 | Symbols: | O-methyltransferase family 2 protein | chr4:16730989-16732808 REVERSEmoderately similar to ( 239) ZRP4\_MAIZE O-methyltransferase ZRP4 (EC 2.1.1.-) (OMT) - Zea mays (Maize)moderately similar to ( 271) loc\_os06g13280 12006.m06043 protein O-methyltransferase ZRP4, putative seq=cds; coord=10:1919386..1920869:-1; parent\_gene=GRMZM2G104710'

'moderately similar to ( 359) AT5G25400 | Symbols: | phosphate translocator-related | chr5:8823283-8824332 FORWARDmoderately similar to ( 420) loc\_os12g04170 12012.m04412 protein plastidic phosphate translocator-like protein1, putative, expressed seq=cds; coord=10:2005967..2007702:1; parent\_gene=GRMZM2G178734'

'weakly similar to ( 176) AT1G53350 | Symbols: | ATP binding | chr1:19903899-19907515 FORWARDhighly similar to ( 519) loc\_os11g37880 12011.m07634 protein stripe rust resistance protein Yr10, putative, expressed seq=cds; coord=10:2984369..2993434:1; parent\_gene=GRMZM2G004412'

'moderately similar to ( 263) loc\_os01g02280 12001.m06870 protein NB-ARC domain containing protein seq=cds; coord=10:3160480..3163283:1; parent\_gene=GRMZM2G356817'

'moderately similar to ( 419) AT1G08960 | Symbols: CAX11, ATCAX11 | CAX11; calcium:sodium antiporter/ cation:cation antiporter | chr1:2879698-2881877 FORWARDweakly similar to ( 193) loc\_os11g05070 12011.m04705 protein sodium/potassium/calcium exchanger 6 precursor, putative, expressed seq=cds; coord=10:4682046..4687554:-1; parent\_gene=GRMZM2G004414'

'moderately similar to ( 206) AT2G44050 | Symbols: COS1 | COS1 (COI1 SUPPRESSOR1); 6,7-dimethyl-8-ribityllumazine synthase | chr2:18224304-18225917 FORWARDweakly similar to ( 184) RISB\_SPIOL 6,7-dimethyl-8-ribityllumazine synthase, chloroplast precursor (EC 2.5.1.9) (DMRL synthase) (Lumazine synthase) - Spinacia oleracea (Spinach)moderately similar to ( 262) loc\_os04g42000 12004.m09174 protein 6,7-dimethyl-8-ribityllumazine synthase, chloroplast precursor, putative, expressed seq=cds; coord=10:145895417..145903773:1; parent\_gene=GRMZM2G143480'

'very weakly similar to (92.0) AT5G20900 | Symbols: JAZ12, TIFY3B | JAZ12 (JASMONATE-ZIM-DOMAIN PROTEIN 12) | chr5:7090883-7092201 FORWARDweakly similar to ( 183) loc\_os04g55920 12004.m35599 protein ZIM motif family protein, expressed seq=cds; coord=10:145933966..145937989:1; parent\_gene=GRMZM2G143402'

'very weakly similar to (82.0) AT5G25190 | Symbols: | ethylene-responsive element-binding protein, putative | chr5:8707007-8707655 REVERSEweakly similar to ( 105) loc\_os04g56150 12004.m10506 protein ethylene-responsive transcription factor 4, putative seq=cds; coord=10:146118823..146119727:1; parent\_gene=GRMZM2G104260'



'nearly identical (1538) AT4G30190 | Symbols: AHA2, PMA2 | AHA2; ATPase/ hydrogen-exporting ATPase, phosphorylative mechanism | chr4:14770820-14775920 REVERSEnearly identical (1693) PMA1\_ORYSA Plasma membrane ATPase (EC 3.6.3.6) (Proton pump) - Oryza sativa (Rice)nearly identical (1693) loc\_os04g56160 12004.m101441 protein plasma membrane ATPase, putative, expressed seq=cds; coord=10:146179462..146186581:1; parent\_gene=GRMZM2G006894'

'moderately similar to ( 328) AT2G18060 | Symbols: VND1, ANAC037 | VND1 (VASCULAR RELATED NAC-DOMAIN PROTEIN 1); transcription factor | chr2:7848399-7850303 REVERSEmoderately similar to ( 232) NAC76\_ORYSA NAC domain-containing protein 76 (ONAC076) - Oryza sativa (Rice)moderately similar to ( 439) loc\_os03g03540 12003.m05887 protein ANAC037, putative, expressed seq=cds; coord=1:5635814..5642763:-1; parent\_gene=GRMZM2G025642'

'moderately similar to ( 202) AT5G52840 | Symbols: | NADH-ubiquinone oxidoreductase-related | chr5:21413718-21414794 FORWARDmoderately similar to ( 260) loc\_os03g19890 12003.m07402 protein NADH-ubiquinone oxidoreductase 13 kDa-B subunit, putative, expressed seq=cds; coord=1:51013925..51015964:1; parent\_gene=GRMZM2G018941'

'moderately similar to ( 210) AT5G13850 | Symbols: NACA3 | NACA3 (NASCENT POLYPEPTIDE-ASSOCIATED COMPLEX SUBUNIT ALPHA-LIKE PROTEIN 3) | chr5:4471361-4472676 FORWARDmoderately similar to ( 217) loc\_os05g31000 12005.m07335 protein nascent polypeptide-associated complex alpha subunit-like protein, putative, expressed seq=cds; coord=1:60163114..60165406:1; parent\_gene=GRMZM2G000923'

'weakly similar to ( 191) AT5G51890 | Symbols: | peroxidase | chr5:21091163-21092335 REVERSEweakly similar to ( 187) PER2\_ORYSA Peroxidase 2 precursor (EC 1.11.1.7) - Oryza sativa (Rice)moderately similar to ( 394) loc\_os03g25360 12003.m07880 protein peroxidase 66 precursor, putative, expressed seq=cds; coord=1:63676345..63677920:1; parent\_gene=GRMZM2G004984'

'very weakly similar to (93.6) AT4G34410 | Symbols: RRTF1 | RRTF1 ( {REDOX RESPONSIVE TRANSCRIPTION FACTOR 1); DNA binding / transcription factor | chr4:16451992-16452798 FORWARDmoderately similar to ( 204) loc\_os08g36920 12008.m07680 protein AP2 domain containing protein, expressed seq=cds; coord=1:199639973..199641110:1; parent\_gene=GRMZM2G369472'

'highly similar to ( 649) AT3G24660 | Symbols: TMKL1 | TMKL1 (transmembrane kinase-like 1); ATP binding / kinase/ protein serine/threonine kinase | chr3:9003641-9005751 FORWARDweakly similar to ( 173) RPK1\_IPONI Receptor-like protein kinase precursor (EC 2.7.11.1) - Ipomoea nil (Japanese morning glory) (Pharbitis nil)highly similar to ( 740) loc\_os08g45060 12008.m08476 protein protein Kinase-like protein TMKL1 precursor, putative, expressed seq=cds; coord=1:202158131..202160689:-1; parent\_gene=GRMZM2G422373'

'very weakly similar to (93.2) AT2G36930 | Symbols: | zinc finger (C2H2 type) family protein | chr2:15510002-15511347 REVERSEweakly similar to ( 139) loc\_os08g45040 12008.m080242 protein zinc finger protein 593, putative, expressed seq=cds; coord=1:202226326..202227433:1; parent\_gene=GRMZM2G309269'

'moderately similar to ( 227) AT5G19910 | Symbols: | SOH1 family protein | chr5:6731484-6732821  
REVERSEmoderately similar to ( 259) loc\_os10g41450 12010.m06909 protein mediator complex subunit SOH1,  
putative, expressed seq=cds; coord=1:203330178..203337402:1; parent\_gene=GRMZM2G139683'

'weakly similar to ( 160) AT1G72610 | Symbols: GLP1, ATGER1, GER1 | GER1 (GERMIN-LIKE PROTEIN 1);  
oxalate oxidase | chr1:27339302-27339928 REVERSEweakly similar to ( 161) AB19B\_PRUPE Auxin-binding protein  
ABP19b precursor - Prunus persica (Peach)moderately similar to ( 207) loc\_os08g35750 12008.m07564 protein  
germin-like protein 1 precursor, putative, expressed seq=cds; coord=1:207891946..207892644:1;  
parent\_gene=AC195794.3\_FG002'

'weakly similar to ( 160) AT1G72610 | Symbols: GLP1, ATGER1, GER1 | GER1 (GERMIN-LIKE PROTEIN 1);  
oxalate oxidase | chr1:27339302-27339928 REVERSEweakly similar to ( 161) AB19B\_PRUPE Auxin-binding protein  
ABP19b precursor - Prunus persica (Peach)moderately similar to ( 207) loc\_os08g35750 12008.m07564 protein  
germin-like protein 1 precursor, putative, expressed seq=cds; coord=1:207891946..207892644:1;  
parent\_gene=AC195794.3\_FG002'

'weakly similar to ( 164) AT2G06050 | Symbols: OPR3 | OPR3 (OPDA-REDUCTASE 3); 12-oxophytodienoate  
reductase | chr2:2359240-2361971 REVERSEmoderately similar to ( 213) loc\_os08g35740 12008.m080177 protein  
12-oxophytodienoate reductase 3, putative, expressed seq=cds; coord=1:207904053..207905956:-1;  
parent\_gene=GRMZM2G148281'

'weakly similar to ( 183) AT4G00180 | Symbols: YAB3 | YAB3 (YABBY3); protein binding / transcription factor |  
chr4:72804-74888 REVERSEweakly similar to ( 106) YAB1\_ORYSA Protein YABBY (OsYAB1) (Filamentous  
flower protein 1) - Oryza sativa (Rice)moderately similar to ( 230) loc\_os10g36420 12010.m06452 protein axial  
regulator YABBY1, putative seq=cds; coord=1:225032510..225037728:1; parent\_gene=GRMZM2G167824'

'nearly identical (1325) AT2G35920 | Symbols: | helicase domain-containing protein | chr2:15075674-15080506  
FORWARDhighly similar to ( 738) loc\_os03g53760 12003.m10345 protein helicase associated domain family protein,  
expressed seq=cds; coord=1:233184997..233210134:1; parent\_gene=GRMZM2G399212'

'moderately similar to ( 350) AT2G38970 | Symbols: | zinc finger (C3HC4-type RING finger) family protein |  
chr2:16274135-16276651 FORWARDhighly similar to ( 538) loc\_os10g32760 12010.m06112 protein protein binding  
protein, putative, expressed seq=cds; coord=1:233813747..233815947:-1; parent\_gene=GRMZM2G398198'

'weakly similar to ( 176) AT4G20380 | Symbols: | zinc finger protein (LSD1) | chr4:11005027-11006438  
FORWARDmoderately similar to ( 243) loc\_os03g43840 12003.m09425 protein zinc finger protein LSD2, putative,  
expressed seq=cds; coord=1:252257077..252261490:-1; parent\_gene=GRMZM2G173425'

'weakly similar to ( 173) AT5G67420 | Symbols: LBD37 | LBD37 (LOB DOMAIN-CONTAINING PROTEIN 37) |  
chr5:26904576-26905415 REVERSEmoderately similar to ( 262) loc\_os03g41330 12003.m09201 protein seed  
specific protein Bn15D17A, putative, expressed seq=cds; coord=1:255323652..255325701:1;  
parent\_gene=GRMZM2G017319'

'weakly similar to ( 173) AT5G67420 | Symbols: LBD37 | LBD37 (LOB DOMAIN-CONTAINING PROTEIN 37) | chr5:26904576-26905415 REVERSEmoderately similar to ( 262) loc\_os03g41330 12003.m09201 protein seed specific protein Bn15D17A, putative, expressed seq=cds; coord=1:255323652..255325701:1; parent\_gene=GRMZM2G017319'

'weakly similar to ( 180) AT4G37740 | Symbols: AtGRF2 | AtGRF2 (GROWTHREGULATING FACTOR 2); transcription activator | chr4:17725533-17727609 REVERSEhighly similar to ( 517) loc\_os03g47140 12003.m09727 protein atGRF2, putative, expressed seq=cds; coord=1:257186167..257188884:-1; parent\_gene=GRMZM2G018414'

'highly similar to ( 775) AT1G58520 | Symbols: RXW8 | hydrolase, acting on ester bonds / lipase | chr1:21729913-21731344 FORWARDnearly identical (1125) loc\_os12g43720 12012.m08145 protein RXW8, putative, expressed seq=cds; coord=1:257314578..257324941:1; parent\_gene=GRMZM2G409093'

'highly similar to ( 775) AT1G58520 | Symbols: RXW8 | hydrolase, acting on ester bonds / lipase | chr1:21729913-21731344 FORWARDnearly identical (1125) loc\_os12g43720 12012.m08145 protein RXW8, putative, expressed seq=cds; coord=1:257314578..257324941:1; parent\_gene=GRMZM2G409093'

'moderately similar to ( 346) GLB1\_MAIZE Globulin-1 S allele precursor (GLB1-S) (7S-like) - Zea mays (Maize)moderately similar to ( 264) loc\_os03g46100 12003.m35340 protein globulin-1 S allele precursor, putative, expressed seq=cds; coord=1:258363413..258366718:1; parent\_gene=GRMZM2G067919'

'highly similar to ( 675) AT4G28450 | Symbols: | nucleotide binding / protein binding | chr4:14061724-14064582 REVERSEhighly similar to ( 845) loc\_os01g13730 12001.m07981 protein protein SOF1, putative, expressed seq=cds; coord=1:299113982..299122437:1; parent\_gene=GRMZM2G590033'

'moderately similar to ( 367) AT5G03540 | Symbols: ATEXO70A1 | ATEXO70A1 (exocyst subunit EXO70 family protein A1); protein binding | chr5:890194-893916 FORWARDmoderately similar to ( 469) loc\_os04g58880 12004.m10768 protein protein binding protein, putative, expressed seq=cds; coord=2:88161..90584:-1; parent\_gene=GRMZM2G074530'

'nearly identical (1205) AT1G08190 | Symbols: | vacuolar assembly protein, putative (VPS41) | chr1:2567652-2573142 FORWARDnearly identical (1593) loc\_os04g11880 12004.m35250 protein vacuolar assembly protein VPS41, putative, expressed seq=cds; coord=2:2040400..2047121:1; parent\_gene=GRMZM2G040247'

'highly similar to ( 687) AT5G37020 | Symbols: ARF8 | ARF8 (AUXIN RESPONSE FACTOR 8); transcription factor | chr5:14630151-14633916 FORWARDnearly identical (1283) loc\_os04g57610 12004.m35224 protein auxin response factor 8, putative, expressed seq=cds; coord=2:2266715..2274671:1; parent\_gene=GRMZM2G078274'

'moderately similar to ( 310) AT5G67170 | Symbols: | SEC-C motif-containing protein / OTU-like cysteine protease family protein | chr5:26799851-26801763 FORWARDmoderately similar to ( 464) loc\_os04g57480 12004.m101690 protein OTU domain-containing protein 3, putative, expressed seq=cds; coord=2:2533374..2536615:1; parent\_gene=GRMZM2G107187'

'highly similar to ( 926) AT5G46330 | Symbols: FLS2 | FLS2 (FLAGELLIN-SENSITIVE 2); ATP binding / kinase/ protein binding / protein serine/threonine kinase/ transmembrane receptor protein serine/threonine kinase | chr5:18791802-18795407 FORWARDmoderately similar to ( 474) RPK1\_IPONI Receptor-like protein kinase precursor (EC 2.7.11.1) - Ipomoea nil (Japanese morning glory) (Pharbitis nil)nearly identical (1411) loc\_os04g52780 12004.m10171 protein leucine-rich repeat receptor protein kinase EXS precursor, putative, expressed seq=cds; coord=2:9441323..9445539:1; parent\_gene=GRMZM2G080041'

'nearly identical (1261) AT2G33170 | Symbols: | leucine-rich repeat transmembrane protein kinase, putative | chr2:14056371-14059829 REVERSEmoderately similar to ( 440) RPK1\_IPONI Receptor-like protein kinase precursor (EC 2.7.11.1) - Ipomoea nil (Japanese morning glory) (Pharbitis nil)nearly identical (1732) loc\_os04g42700 12004.m09235 protein receptor-like protein kinase precursor, putative, expressed seq=cds; coord=2:30586576..30591920:1; parent\_gene=GRMZM2G082191'

'moderately similar to ( 283) AT3G25980 | Symbols: | mitotic spindle checkpoint protein, putative (MAD2) | chr3:9503232-9504402 FORWARDmoderately similar to ( 330) MAD2\_MAIZE Mitotic spindle checkpoint protein MAD2 - Zea mays (Maize)moderately similar to ( 312) loc\_os04g40940 12004.m35349 protein mitotic spindle checkpoint protein MAD2, putative, expressed seq=cds; coord=2:36358387..36360987:1; parent\_gene=GRMZM2G112072'

'moderately similar to ( 473) AT4G24790 | Symbols: | ATP binding / DNA binding / DNA-directed DNA polymerase | chr4:12778222-12781345 FORWARDhighly similar to ( 870) loc\_os12g19180 12012.m05871 protein nucleoside-triphosphatase/ nucleotide binding protein, putative, expressed seq=cds; coord=2:36838775..36842537:-1; parent\_gene=GRMZM2G044989'

'weakly similar to ( 134) loc\_os09g26780 12009.m05830 protein pnFL-2, putative, expressed seq=cds; coord=2:183999694..184001704:-1; parent\_gene=GRMZM2G005954'

'moderately similar to ( 301) AT2G03200 | Symbols: | aspartyl protease family protein | chr2:966506-967891 REVERSEhighly similar to ( 583) loc\_os09g27910 12009.m05942 protein aspartic proteinase nepenthesin-1 precursor, putative, expressed seq=cds; coord=2:185438627..185440309:-1; parent\_gene=GRMZM2G090603'

'moderately similar to ( 405) AT3G63470 | Symbols: scpl40 | scpl40 (serine carboxypeptidase-like 40); serine-type carboxypeptidase | chr3:23438561-23440862 FORWARDmoderately similar to ( 412) CBP23\_HORVU Serine carboxypeptidase II-3 precursor (EC 3.4.16.6) (CP-MIL3) [Contains: Serine carboxypeptidase II-3 chain A; Serine carboxypeptidase II-3 chain B] - Hordeum vulgare (Barley)highly similar to ( 632) loc\_os09g28840 12009.m06035 protein serine carboxypeptidase family protein, expressed seq=cds; coord=2:186899047..186901405:-1; parent\_gene=GRMZM2G168196'

'weakly similar to ( 119) loc\_os09g31300 12009.m22140 protein helix-loop-helix DNA-binding domain containing protein, expressed seq=cds; coord=2:189701055..189703654:1; parent\_gene=GRMZM2G417597'

'highly similar to ( 648) AT1G31690 | Symbols: | amine oxidase/ copper ion binding / quinone binding | chr1:11343980-11347767 FORWARDhighly similar to ( 628) AMO\_PEA Amine oxidase [copper-containing] precursor (EC 1.4.3.6) - Pisum sativum (Garden pea)highly similar to ( 917) loc\_os06g23114 12006.m06963 protein amine oxidase precursor, putative, expressed seq=cds; coord=2:206256271..206260005:1; parent\_gene=GRMZM2G042660'

'very weakly similar to (89.4) loc\_os10g42830 12010.m07035 protein D-xylose-proton symporter, putative, expressed seq=cds; coord=2:214300285..214302406:1; parent\_gene=GRMZM2G452930'

'weakly similar to ( 129) AT5G65980 | Symbols: | auxin efflux carrier family protein | chr5:26392444-26394232 FORWARDmoderately similar to ( 266) loc\_os09g38130 12009.m060062 protein auxin Efflux Carrier family protein, expressed seq=cds; coord=2:215629822..215632213:-1; parent\_gene=GRMZM2G070563'

'weakly similar to ( 127) AT5G46860 | Symbols: VAM3, ATVAM3, SYP22, ATSYYP22, SGR3 | VAM3; SNAP receptor | chr5:19012342-19013795 REVERSEweakly similar to ( 164) loc\_os01g15110 12001.m08110 protein syntaxin 23, putative, expressed seq=cds; coord=3:8304153..8306580:1; parent\_gene=GRMZM2G015509'

'weakly similar to ( 150) AT5G12020 | Symbols: HSP17.6II | HSP17.6II (17.6 KDA CLASS II HEAT SHOCK PROTEIN) | chr5:3882409-3882876 REVERSEmoderately similar to ( 231) HSP21\_MAIZE 17.5 kDa class II heat shock protein - Zea mays (Maize)weakly similar to ( 197) loc\_os01g08860 12001.m150501 protein 17.5 kDa class II heat shock protein, putative, expressed seq=cds; coord=3:8884623..8885815:-1; parent\_gene=GRMZM2G083810'

'weakly similar to ( 156) AT4G39410 | Symbols: WRKY13, ATWRKY13 | WRKY13; transcription factor | chr4:18332937-18334789 REVERSEweakly similar to ( 166) loc\_os01g08710 12001.m07496 protein OsWRKY79 - Superfamily of rice TFs having WRKY and zinc finger domains, expressed seq=cds; coord=3:9234113..9242047:1; parent\_gene=GRMZM2G151444'

'weakly similar to ( 126) loc\_os01g69270 12001.m13027 protein MYND finger family protein, expressed seq=cds; coord=3:159817015..159819103:1; parent\_gene=GRMZM2G133428'

'moderately similar to ( 327) AT4G32175 | Symbols: | RNA binding | chr4:15535555-15537537 FORWARDmoderately similar to ( 424) loc\_os01g66730 12001.m150798 protein exosome complex exonuclease RRP40, putative, expressed seq=cds; coord=3:211858569..211866122:-1; parent\_gene=GRMZM2G173989'

'weakly similar to ( 163) AT5G55340 | Symbols: | long-chain-alcohol O-fatty-acyltransferase family protein / wax synthase family protein | chr5:22439985-22440986 REVERSEmoderately similar to ( 475) loc\_os01g46270 12001.m10825 protein wax synthase isoform 3, putative, expressed seq=cds; coord=3:213797343..213799289:-1; parent\_gene=GRMZM2G349407'

'moderately similar to ( 252) AT1G31550 | Symbols: | GDSL-motif lipase, putative | chr1:11295635-11297284 REVERSEweakly similar to ( 145) EST\_HEVBR Esterase precursor (EC 3.1.1.-) (Early nodule-specific protein homolog) (Latex allergen Hev b 13) - Hevea brasiliensis (Para rubber tree)moderately similar to ( 292) loc\_os01g42730 12001.m10537 protein alpha-L-fucosidase 2 precursor, putative, expressed seq=cds; coord=3:213800453..213804523:-1; parent\_gene=GRMZM2G047129'

'weakly similar to ( 178) AT1G28600 | Symbols: | lipase, putative | chr1:10051604-10053073 REVERSEvery weakly similar to (86.7) EST\_HEVBR Esterase precursor (EC 3.1.1.-) (Early nodule-specific protein homolog) (Latex allergen Hev b 13) - Hevea brasiliensis (Para rubber tree)weakly similar to ( 194) loc\_os01g42730 12001.m10537 protein alpha-L-fucosidase 2 precursor, putative, expressed seq=cds; coord=3:213800866..213804340:-1; parent\_gene=GRMZM2G047129'

'highly similar to ( 505) AT1G53240 | Symbols: | malate dehydrogenase (NAD), mitochondrial | chr1:19854966-19856802 REVERSEhighly similar to ( 508) MDHM\_FRAAN Malate dehydrogenase, mitochondrial precursor (EC 1.1.1.37) - Fragaria ananassa (Strawberry)highly similar to ( 587) loc\_os01g46070 12001.m10806 protein malate dehydrogenase, mitochondrial precursor, putative, expressed seq=cds; coord=3:213896741..213905427:1; parent\_gene=GRMZM2G466833'

'moderately similar to ( 245) AT5G14740 | Symbols: CA2, CA18, BETA CA2 | CA2 (CARBONIC ANHYDRASE 2); carbonate dehydratase/ zinc ion binding | chr5:4758257-4762315 FORWARDmoderately similar to ( 340) CAHC\_HORVU Carbonic anhydrase, chloroplast precursor (EC 4.2.1.1) (Carbonate dehydratase) - Hordeum vulgare (Barley)moderately similar to ( 340) loc\_os01g45274 12001.m150428 protein carbonic anhydrase, chloroplast precursor, putative, expressed seq=cds; coord=3:215466579..215473931:-1; parent\_gene=GRMZM2G121878'

'moderately similar to ( 205) AT1G14510 | Symbols: AL7 | AL7 (ALFIN-LIKE 7); DNA binding / methylated histone residue binding | chr1:4962171-4964154 REVERSEmoderately similar to ( 268) loc\_os11g14010 12011.m28769 protein PHD finger protein, putative, expressed seq=cds; coord=4:11389157..11413875:-1; parent\_gene=GRMZM2G008259'

'weakly similar to ( 135) AT3G25470 | Symbols: | bacterial hemolysin-related | chr3:9233039-9235022 FORWARDweakly similar to ( 166) loc\_os11g14230 12011.m05560 protein hemolysin A, putative, expressed seq=cds; coord=4:12043149..12045067:-1; parent\_gene=GRMZM2G010056'

'very weakly similar to ( 100) AT3G06190 | Symbols: ATBPM2, BPM2 | BPM2 (BTB-POZ AND MATH DOMAIN 2); protein binding | chr3:1874577-1876575 REVERSEweakly similar to ( 144) loc\_os08g13000 12008.m05427 protein speckle-type POZ protein, putative seq=cds; coord=4:25991768..25992949:-1; parent\_gene=GRMZM2G026724'

'very weakly similar to ( 100) AT3G06190 | Symbols: ATBPM2, BPM2 | BPM2 (BTB-POZ AND MATH DOMAIN 2); protein binding | chr3:1874577-1876575 REVERSEweakly similar to ( 144) loc\_os08g13000 12008.m05427 protein speckle-type POZ protein, putative seq=cds; coord=4:25991768..25992949:-1; parent\_gene=GRMZM2G026724'

'moderately similar to ( 400) AT1G11650 | Symbols: ATRBP45B, RBP45B | RNA-binding protein 45 (RBP45), putative | chr1:3914895-3917301 FORWARDhighly similar to ( 518) loc\_os08g09100 12008.m05045 protein expressed protein seq=cds; coord=4:28340661..28347586:1; parent\_gene=GRMZM2G426591'

'moderately similar to ( 276) AT1G75660 | Symbols: XRN3 | XRN3; 5'-3' exoribonuclease | chr1:28408289-28414825 FORWARDweakly similar to ( 143) CR2\_HORVU Cold-regulated protein 2 (Fragment) - Hordeum vulgare (Barley)highly similar to ( 501) loc\_os01g65220 12001.m12635 protein XRN3, putative, expressed seq=cds; coord=4:29116247..29129683:1; parent\_gene=GRMZM2G064868'

'moderately similar to ( 370) AT3G26670 | Symbols: | FUNCTIONS IN: molecular\_function unknown; INVOLVED IN: biological\_process unknown; LOCATED IN: cellular\_component unknown; EXPRESSED IN: 23 plant structures; EXPRESSED DURING: 15 growth stages; CONTAINS InterPro DOMAIN/s: Protein of unknown function DUF803 (InterPro:IPR008521); BEST Arabidopsis thaliana protein match is: permease-related (TAIR:AT3G23870.1); Has 715 Blast hits to 711 proteins in 119 species: Archae - 0; Bacteria - 0; Metazoa - 298; Fungi - 244; Plants - 119; Viruses - 2; Other Eukaryotes - 52 (source: NCBI BLINK). | chr3:9798236-9800562 REVERSEhighly similar to ( 508) loc\_os02g31874 12002.m08280 protein expressed protein seq=cds; coord=4:94742292..94746687:-1; parent\_gene=GRMZM2G144254'

'very weakly similar to (95.1) AT4G27090 | Symbols: | 60S ribosomal protein L14 (RPL14B) | chr4:13594104-13595187 REVERSEvery weakly similar to (93.6) RL14\_PEA Probable 60 ribosomal protein L14 (Hydroxyproline-rich glycoprotein HRGP1) - Pisum sativum (Garden pea)weakly similar to ( 117) loc\_os04g43540 12004.m09314 protein 60 ribosomal protein L14, putative, expressed seq=cds; coord=4:111487916..111492785:1; parent\_gene=GRMZM2G323971'

'moderately similar to ( 208) loc\_os07g23900 12007.m06668 protein F-box domain containing protein, expressed seq=cds; coord=4:131648815..131650074:-1; parent\_gene=GRMZM2G139670'

'moderately similar to ( 491) AT3G50790 | Symbols: | late embryogenesis abundant protein, putative / LEA protein, putative | chr3:18880074-18881940 REVERSEhighly similar to ( 627) loc\_os02g43340 12002.m33800 protein embryogenesis-associated protein EMB8, putative, expressed seq=cds; coord=4:150464178..150469660:-1; parent\_gene=GRMZM2G100716'

'moderately similar to ( 230) AT5G10770 | Symbols: | chloroplast nucleoid DNA-binding protein, putative | chr5:3403331-3405331 REVERSEmoderately similar to ( 429) loc\_os02g48870 12002.m09921 protein aspartic proteinase nepenthesin-2 precursor, putative, expressed seq=cds; coord=4:163993868..163995643:-1; parent\_gene=GRMZM2G168431'

'moderately similar to ( 230) AT5G10770 | Symbols: | chloroplast nucleoid DNA-binding protein, putative | chr5:3403331-3405331 REVERSEmoderately similar to ( 429) loc\_os02g48870 12002.m09921 protein aspartic proteinase nepenthesin-2 precursor, putative, expressed seq=cds; coord=4:163993868..163995643:-1; parent\_gene=GRMZM2G168431'

'weakly similar to ( 161) AT4G01150 | Symbols: | unknown protein | chr4:493692-494379 FORWARDweakly similar to ( 187) loc\_os02g49870 12002.m10021 protein expressed protein seq=cds; coord=4:166773457..166774717:1; parent\_gene=GRMZM2G380457'

'moderately similar to ( 243) AT2G01680 | Symbols: | ankyrin repeat family protein | chr2:306597-308427 FORWARDmoderately similar to ( 378) loc\_os02g50270 12002.m10061 protein protein binding protein, putative, expressed seq=cds; coord=4:167169708..167183709:1; parent\_gene=GRMZM2G136996'

'nearly identical (1001) AT1G73370 | Symbols: SUS6, ATSUS6 | SUS6 (SUCROSE SYNTHASE 6); UDP-glycosyltransferase/ sucrose synthase | chr1:27584533-27588326 REVERSEhighly similar to ( 816) SUS2\_PEA Sucrose synthase 2 (EC 2.4.1.13) (Sucrose-UDP glucosyltransferase 2) - Pisum sativum (Garden pea)nearly identical (1244) loc\_os02g58480 12002.m10869 protein sucrose synthase 2, putative, expressed seq=cds; coord=4:168743488..168746616:-1; parent\_gene=GRMZM2G045171'

'weakly similar to ( 148) AT2G33310 | Symbols: IAA13 | IAA13; transcription factor | chr2:14114569-14115757 REVERSEmoderately similar to ( 288) IAA10\_ORYSA Auxin-responsive protein IAA10 (Indoleacetic acid-induced protein 10) - Oryza sativa (Rice)moderately similar to ( 292) loc\_os02g57250 12002.m33477 protein OsIAA10 - Auxin-responsive Aux/IAA gene family member, expressed seq=cds; coord=4:171373109..171375531:1; parent\_gene=GRMZM2G142768'

'moderately similar to ( 207) AT1G44835 | Symbols: | YbaK/prolyl-tRNA synthetase family protein | chr1:16939909-16942337 FORWARDmoderately similar to ( 273) loc\_os02g52880 12002.m10318 protein ybaK/prolyl-tRNA synthetase associated region, putative, expressed seq=cds; coord=4:178455228..178463927:1; parent\_gene=GRMZM2G170313'

'highly similar to ( 709) AT1G78240 | Symbols: TSD2, QUA2 | TSD2 (TUMOROUS SHOOT DEVELOPMENT 2); methyltransferase | chr1:29433173-29435815 REVERSEnearly identical (1086) loc\_os02g51860 12002.m10217 protein ATP binding protein, putative, expressed seq=cds; coord=4:180498698..180504090:1; parent\_gene=GRMZM2G000764'

'moderately similar to ( 410) AT1G16670 | Symbols: | protein kinase family protein | chr1:5697846-5699492 FORWARDmoderately similar to ( 216) NORK\_MEDTR Nodulation receptor kinase precursor (EC 2.7.11.1) (Does not make infections protein 2) (Symbiosis receptor-like kinase) (MtSYMRK) - Medicago truncatula (Barrel medic)highly similar to ( 596) loc\_os02g06930 12002.m100111 protein serine/threonine-protein kinase receptor precursor, putative, expressed seq=cds; coord=4:236412858..236415822:-1; parent\_gene=GRMZM2G169020'

'weakly similar to ( 161) loc\_os02g06660 12002.m06014 protein desiccation-associated protein, putative seq=cds; coord=4:236733466..236735600:-1; parent\_gene=GRMZM2G101920'

'weakly similar to ( 107) AT1G30210 | Symbols: TCP24 | TCP24 (TEOSINTE BRANCHED1, CYCLOIDEA, AND PCF FAMILY 24); transcription factor | chr1:10628754-10629728 REVERSEmoderately similar to ( 248) loc\_os03g57190 12003.m10638 protein TCP family transcription factor containing protein, expressed seq=cds; coord=5:4945066..4946626:-1; parent\_gene=GRMZM2G089361'

'weakly similar to ( 102) loc\_os03g57240 12003.m10643 protein expressed protein seq=cds; coord=5:4917795..4919451:1; parent\_gene=GRMZM2G089448'

'weakly similar to ( 149) AT5G63370 | Symbols: | protein kinase family protein | chr5:25384954-25386390 REVERSEweakly similar to ( 115) CDC2\_VIGUN Cell division control protein 2 homolog (EC 2.7.11.22) (EC 2.7.11.23) (p34cdc2) - Vigna unguiculata (Cowpea)moderately similar to ( 218) loc\_os12g23930 12012.m06228 protein protein kinase domain containing protein, expressed seq=cds; coord=5:7719942..7721101:1; parent\_gene=GRMZM2G350844'

'moderately similar to ( 458) AT3G01750 | Symbols: | ankyrin repeat family protein | chr3:270615-272691 FORWARDhighly similar to ( 729) loc\_os05g23320 12005.m06627 protein expressed protein seq=cds; coord=5:163409583..163412899:1; parent\_gene=GRMZM2G474531'

'weakly similar to ( 107) AT3G01490 | Symbols: | protein kinase, putative | chr3:191095-193258 REVERSEweakly similar to ( 114) loc\_os01g45380 12001.m10741 protein ATP binding protein, putative, expressed seq=cds; coord=5:185221807..185225537:1; parent\_gene=GRMZM2G463711'

'highly similar to ( 606) AT1G64780 | Symbols: ATAMT1;2, AMT1;2 | ATAMT1;2 (AMMONIUM TRANSPORTER 1;2); ammonium transmembrane transporter | chr1:24061021-24062565 REVERSEhighly similar to ( 730) loc\_os02g40730 12002.m09159 protein ammonium transporter 1, member 2, putative, expressed seq=cds; coord=5:185655742..185657715:1; parent\_gene=GRMZM2G028736'



'highly similar to ( 638) AT2G20420 | Symbols: | succinyl-CoA ligase (GDP-forming) beta-chain, mitochondrial, putative / succinyl-CoA synthetase, beta chain, putative / SCS-beta, putative | chr2:8805574-8807858  
FORWARDhighly similar to ( 696) SUCB\_ORYSA Succinyl-CoA ligase [GDP-forming] beta-chain, mitochondrial precursor (EC 6.2.1.4) (Succinyl-CoA synthetase, beta chain) (SCS-beta) - Oryza sativa (Rice)highly similar to ( 696) loc\_os02g40830 12002.m100283 protein succinyl-CoA ligase beta-chain, mitochondrial precursor, putative, expressed seq=cds; coord=5:186081955..186094328:1; parent\_gene=GRMZM2G064695'

'highly similar to ( 638) AT2G20420 | Symbols: | succinyl-CoA ligase (GDP-forming) beta-chain, mitochondrial, putative / succinyl-CoA synthetase, beta chain, putative / SCS-beta, putative | chr2:8805574-8807858  
FORWARDhighly similar to ( 696) SUCB\_ORYSA Succinyl-CoA ligase [GDP-forming] beta-chain, mitochondrial precursor (EC 6.2.1.4) (Succinyl-CoA synthetase, beta chain) (SCS-beta) - Oryza sativa (Rice)highly similar to ( 696) loc\_os02g40830 12002.m100283 protein succinyl-CoA ligase beta-chain, mitochondrial precursor, putative, expressed seq=cds; coord=5:186081955..186094328:1; parent\_gene=GRMZM2G064695'

'highly similar to ( 582) AT5G03300 | Symbols: ADK2 | ADK2 (ADENOSINE KINASE 2); adenosine kinase/ copper ion binding / kinase | chr5:796573-798997 FORWARDmoderately similar to ( 479) ADK\_PHYPA Adenosine kinase (EC 2.7.1.20) (AK) (Adenosine 5'-phosphotransferase) - Physcomitrella patens (Moss)highly similar to ( 654) loc\_os02g41590 12002.m09195 protein adenosine kinase 2, putative, expressed seq=cds; coord=5:186517098..186522957:-1; parent\_gene=GRMZM2G540538'

'weakly similar to ( 139) AT2G37040 | Symbols: pal1, ATPAL1 | pal1 (Phe ammonia lyase 1); phenylalanine ammonia-lyase | chr2:15557602-15560237 REVERSEmoderately similar to ( 221) PAL1\_ORYSA Phenylalanine ammonia-lyase (EC 4.3.1.5) - Oryza sativa (Rice)moderately similar to ( 221) loc\_os02g41630 12002.m33418 protein phenylalanine ammonia-lyase, putative, expressed seq=cds; coord=5:186679860..186680704:-1; parent\_gene=GRMZM2G074604'

'moderately similar to ( 224) AT5G47180 | Symbols: | vesicle-associated membrane family protein / VAMP family protein | chr5:19161384-19163265 REVERSEmoderately similar to ( 362) loc\_os10g40140 12010.m06786 protein structural molecule, putative, expressed seq=cds; coord=5:190745409..190748730:-1; parent\_gene=GRMZM2G171406'

'moderately similar to ( 224) AT5G47180 | Symbols: | vesicle-associated membrane family protein / VAMP family protein | chr5:19161384-19163265 REVERSEmoderately similar to ( 362) loc\_os10g40140 12010.m06786 protein structural molecule, putative, expressed seq=cds; coord=5:190745409..190748730:-1; parent\_gene=GRMZM2G171406'

'moderately similar to ( 243) AT5G47310 | Symbols: | unknown protein | chr5:19201325-19202674  
FORWARDmoderately similar to ( 338) loc\_os02g43840 12002.m09418 protein EREBP-4 like protein, putative, expressed seq=cds; coord=5:191360703..191363562:-1; parent\_gene=GRMZM2G071844'

'weakly similar to ( 105) AT1G68280 | Symbols: | thioesterase-related | chr1:25592467-25593595 REVERSEweakly similar to ( 146) loc\_os02g44136 12002.m09455 protein retrotransposon protein, putative, Tyl1-copia subclass seq=cds; coord=5:192258201..192258960:-1; parent\_gene=GRMZM2G306566'

'highly similar to ( 838) AT1G68930 | Symbols: | pentatricopeptide (PPR) repeat-containing protein | chr1:25918314-25920545 FORWARDweakly similar to ( 103) RF1\_ORYSA Rf1 protein, mitochondrial precursor (PPR protein) (Fertility restorer) (Restorer for CMS) - Oryza sativa (Rice)nearly identical (1197) loc\_os02g01610 12002.m33989 protein tetratricopeptide-like helical, putative, expressed seq=cds; coord=5:206572964..206575640:-1; parent\_gene=GRMZM2G053396'

'moderately similar to ( 329) AT1G69530 | Symbols: ATEXPA1, EXP1, AT-EXP1, ATEXP1, ATHEXP ALPHA 1.2 | ATEXPA1 (ARABIDOPSIS THALIANA EXPANSIN A1) | chr1:26142034-26143200 FORWARDmoderately similar to ( 395) EXPA5\_ORYSA Expansin-A5 precursor (OsEXPA5) (Alpha-expansin-5) (OsEXP5) (OsaEXPa1.20) - Oryza sativa (Rice)moderately similar to ( 395) loc\_os02g51040 12002.m10138 protein alpha-expansin 15 precursor, putative, expressed seq=cds; coord=5:206838596..206840547:1; parent\_gene=GRMZM2G105844'

'highly similar to ( 503) AT2G02910 | Symbols: | FUNCTIONS IN: molecular\_function unknown; INVOLVED IN: biological\_process unknown; LOCATED IN: cellular\_component unknown; CONTAINS InterPro DOMAIN/s: Protein of unknown function DUF616 (InterPro:IPR006852); BEST Arabidopsis thaliana protein match is: EMB2756 (EMBRYO DEFECTIVE 2756) (TAIR:AT1G34550.1); Has 191 Blast hits to 191 proteins in 22 species: Archae - 6; Bacteria - 21; Metazoa - 0; Fungi - 0; Plants - 106; Viruses - 0; Other Eukaryotes - 58 (source: NCBI BLINK). | chr2:847335-849371 REVERSEmoderately similar to ( 498) loc\_os11g09170 12011.m05114 protein EMB2756, putative, expressed seq=cds; coord=5:207056026..207062515:1; parent\_gene=GRMZM2G380177'

'moderately similar to ( 407) AT4G39770 | Symbols: | trehalose-6-phosphate phosphatase, putative | chr4:18449138-18451218 REVERSEhighly similar to ( 521) loc\_os02g51680 12002.m10199 protein expressed protein seq=cds; coord=5:208172385..208174899:1; parent\_gene=GRMZM2G055150'

'weakly similar to ( 175) AT1G25440 | Symbols: | zinc finger (B-box type) family protein | chr1:8933939-8935284 REVERSEmoderately similar to ( 419) loc\_os02g49880 12002.m10022 protein zinc finger protein CONSTANS-LIKE 16, putative, expressed seq=cds; coord=5:204604955..204606998:1; parent\_gene=GRMZM2G041991'

'highly similar to ( 738) AT1G62830 | Symbols: LDL1, SWP1, ATSWP1 | LDL1 (LSD1-LIKE1); amine oxidase/electron carrier/ oxidoreductase | chr1:23264638-23267172 REVERSEweakly similar to ( 107) PAO\_MAIZE Polyamine oxidase precursor (EC 1.5.3.11) - Zea mays (Maize)nearly identical (1155) loc\_os02g51880 12002.m10219 protein amine oxidase/ oxidoreductase, putative, expressed seq=cds; coord=5:208426880..208429748:1; parent\_gene=GRMZM2G059958'

'moderately similar to ( 406) AT4G32600 | Symbols: | zinc finger (C3HC4-type RING finger) family protein | chr4:15724010-15725737 FORWARDhighly similar to ( 666) loc\_os02g54624 12002.m10491 protein protein binding protein, putative, expressed seq=cds; coord=5:212679128..212684059:1; parent\_gene=GRMZM2G089466'

'very weakly similar to (94.0) AT5G43700 | Symbols: ATAX2-11, IAA4 | ATAX2-11 (AUXIN INDUCIBLE 2-11); DNA binding / transcription factor | chr5:17550465-17551206 FORWARDweakly similar to ( 164) IAA20\_ORYSA Auxin-responsive protein IAA20 (Indoleacetic acid-induced protein 20) - Oryza sativa (Rice)weakly similar to ( 164) loc\_os06g07040 12006.m05429 protein OsIAA20 - Auxin-responsive Aux/IAA gene family member, expressed seq=cds; coord=6:79914748..79916501:-1; parent\_gene=GRMZM2G000158'

'highly similar to ( 675) AT1G16540 | Symbols: SIR3, LOSS, ABA3, ATABA3 | ABA3 (ABA DEFICIENT 3); Molybdopterine cofactor sulfuryase/ selenocysteine lyase | chr1:5659465-5665201 FORWARDhighly similar to ( 769) MOCOS\_ORYSA Molybdenum cofactor sulfuryase (EC 4.4.-.-) (MoCo sulfuryase) (MOS) - Oryza sativa (Rice)highly similar to ( 769) loc\_os06g45860 12006.m09114 protein molybdenum cofactor sulfuryase, putative, expressed seq=cds; coord=6:93182154..93194374:1; parent\_gene=GRMZM2G061821'

'weakly similar to ( 127) AT3G16140 | Symbols: PSAH-1 | PSAH-1 (photosystem I subunit H-1) | chr3:5468670-5469415 REVERSEweakly similar to ( 166) PSAH\_MAIZE Photosystem I reaction center subunit VI, chloroplast precursor (PSI-H) (Light-harvesting complex I 11 kDa protein) - Zea mays (Maize)weakly similar to ( 145) loc\_os05g48630 12005.m08934 protein expressed protein seq=cds; coord=6:163973641..163974980:-1; parent\_gene=GRMZM2G451224'

'highly similar to ( 694) AT4G39830 | Symbols: | L-ascorbate oxidase, putative | chr4:18479103-18481184 FORWARDhighly similar to ( 581) ASO\_CUCSA L-ascorbate oxidase precursor (EC 1.10.3.3) (Ascorbase) (ASO) - Cucumis sativus (Cucumber)highly similar to ( 907) loc\_os09g20090 12009.m05216 protein L-ascorbate oxidase precursor, putative, expressed seq=cds; coord=7:99535861..99539292:-1; parent\_gene=GRMZM2G064106'

'very weakly similar to (82.0) loc\_os05g02120 12005.m04748 protein carboxylic ester hydrolase, putative, expressed seq=cds; coord=7:102656684..102659068:1; parent\_gene=GRMZM2G113750'

'weakly similar to ( 165) AT1G19190 | Symbols: | hydrolase | chr1:6623876-6624832 FORWARDmoderately similar to ( 241) loc\_os09g28760 12009.m06027 protein 2-hydroxyisoflavanone dehydratase, putative, expressed seq=cds; coord=7:126977721..126979734:1; parent\_gene=GRMZM2G420786'

'highly similar to ( 751) AT1G28340 | Symbols: AtRLP4 | AtRLP4 (Receptor Like Protein 4); protein binding | chr1:9940175-9943252 FORWARDweakly similar to ( 115) NORK\_MEDTR Nodulation receptor kinase precursor (EC 2.7.11.1) (Does not make infections protein 2) (Symbiosis receptor-like kinase) (MtSYM RK) - Medicago truncatula (Barrel medic)nearly identical (1021) loc\_os07g31840 12007.m07450 protein protein binding protein, putative, expressed seq=cds; coord=7:150897734..150908003:-1; parent\_gene=GRMZM2G163138'

'weakly similar to ( 189) AT3G15510 | Symbols: ATNAC2, ANAC056, NARS1 | ATNAC2 (ARABIDOPSIS NAC DOMAIN CONTAINING PROTEIN 2); transcription factor | chr3:5243696-5245037 FORWARDweakly similar to ( 163) NAC71\_ORYSA NAC domain-containing protein 71 (ONAC071) - Oryza sativa (Rice)moderately similar to ( 323) loc\_os07g37920 12007.m08041 protein NAM-like protein, putative, expressed seq=cds; coord=7:158236773..158238970:-1; parent\_gene=GRMZM2G179885'

'moderately similar to ( 393) AT4G29230 | Symbols: anac075 | anac075 (Arabidopsis NAC domain containing protein 75); transcription factor | chr4:14410338-14414956 FORWARDhighly similar to ( 612) loc\_os01g09550 12001.m42902 protein ANAC075, putative, expressed seq=cds; coord=8:20827673..20834211:1; parent\_gene=GRMZM2G112681'

'moderately similar to ( 312) AT4G23620 | Symbols: | 50S ribosomal protein-related | chr4:12315016-12316659 REVERSEmoderately similar to ( 421) loc\_os01g41030 12001.m10372 protein 5S rRNA binding protein, putative, expressed seq=cds; coord=8:140749438..140752609:-1; parent\_gene=GRMZM2G423169'

'moderately similar to ( 230) AT4G22220 | Symbols: ISU1, ATISU1 | ISU1; structural molecule | chr4:11759444-11760881 REVERSEmoderately similar to ( 253) loc\_os01g47340 12001.m42683 protein nifU-like N-terminal domain-containing protein, mitochondrial precursor, putative, expressed seq=cds; coord=8:148514901..148519447:-1; parent\_gene=GRMZM2G064336'

'weakly similar to ( 167) AT3G19980 | Symbols: ATFYPP3, EMB2736, STPP | ATFYPP3 (FLOWER-SPECIFIC, PHYTOCHROME-ASSOCIATED PROTEIN PHOSPHATASE 3); protein binding / protein serine/threonine kinase/protein serine/threonine phosphatase | chr3:6962008-6964761 FORWARDweakly similar to ( 127) PP2A3\_ORYSA Serine/threonine-protein phosphatase PP2A-3 catalytic subunit (EC 3.1.3.16) - Oryza sativa (Rice)weakly similar to ( 174) loc\_os01g49690 12001.m11156 protein serine/threonine-protein phosphatase 6, putative, expressed seq=cds; coord=8:152248696..152251518:1; parent\_gene=GRMZM2G518717'

'moderately similar to ( 418) AT1G31730 | Symbols: | epsilon-adaptin, putative | chr1:11359907-11363916 FORWARDmoderately similar to ( 486) loc\_os01g68750 12001.m12977 protein clathrin binding protein, putative, expressed seq=cds; coord=8:162507000..162511297:1; parent\_gene=GRMZM2G031352'

'highly similar to ( 766) AT4G34710 | Symbols: ADC2, SPE2, ATADC2 | ADC2 (ARGININE DECARBOXYLASE 2); arginine decarboxylase | chr4:16560315-16562450 REVERSEnearly identical (1060) SPE1\_ORYSA Arginine decarboxylase (EC 4.1.1.19) (ARGDC) (ADC) - Oryza sativa (Rice)nearly identical (1060) loc\_os06g04070 12006.m05138 protein arginine decarboxylase, putative, expressed seq=cds; coord=9:23526334..23529702:1; parent\_gene=GRMZM2G396553'

'highly similar to ( 766) AT4G34710 | Symbols: ADC2, SPE2, ATADC2 | ADC2 (ARGININE DECARBOXYLASE 2); arginine decarboxylase | chr4:16560315-16562450 REVERSEnearly identical (1060) SPE1\_ORYSA Arginine decarboxylase (EC 4.1.1.19) (ARGDC) (ADC) - Oryza sativa (Rice)nearly identical (1060) loc\_os06g04070 12006.m05138 protein arginine decarboxylase, putative, expressed seq=cds; coord=9:23526334..23529702:1; parent\_gene=GRMZM2G396553'

'highly similar to ( 926) AT2G21480 | Symbols: | protein kinase family protein | chr2:9202753-9205368 REVERSEmoderately similar to ( 264) NORK\_PEA Nodulation receptor kinase precursor (EC 2.7.11.1) - Pisum sativum (Garden pea)nearly identical (1276) loc\_os06g03610 12006.m05093 protein protein kinase, putative, expressed seq=cds; coord=9:25086132..25089397:1; parent\_gene=GRMZM2G335052'

'very weakly similar to (87.8) AT1G51405 | Symbols: | myosin-related | chr1:19057780-19059582 FORWARDmoderately similar to ( 261) loc\_os03g11770 12003.m06629 protein expressed protein seq=cds; coord=9:125860814..125864356:1; parent\_gene=GRMZM2G343856'

'moderately similar to ( 250) AT1G17020 | Symbols: SRG1, ATSRG1 | SRG1 (SENESCENCE-RELATED GENE 1); oxidoreductase, acting on diphenols and related substances as donors, oxygen as acceptor / oxidoreductase, acting on paired donors, with incorporation or reduction of molecular oxygen, 2-oxoglutarate as one donor, and inc | chr1:5820258-5821741 FORWARDweakly similar to ( 149) FLS\_SOLU Flavonol synthase/flavanone 3-hydroxylase (EC 1.14.11.23) (EC 1.14.11.9) (FLS) - Solanum tuberosum (Potato)moderately similar to ( 375) loc\_os01g24980 12001.m43008 protein naringenin,2-oxoglutarate 3-dioxygenase, putative, expressed seq=cds; coord=9:155437067..155438681:-1; parent\_gene=GRMZM2G168355'

'weakly similar to ( 113) AT1G19840 | Symbols: | auxin-responsive family protein | chr1:6872794-6873255 REVERSEweakly similar to ( 194) loc\_os04g56680 12004.m10555 protein OsSAUR22 - Auxin-responsive SAUR gene family member, expressed seq=cds; coord=10:146941492..146942867:-1; parent\_gene=GRMZM2G442000'

'highly similar to ( 552) AT1G19850 | Symbols: MP, ARF5, IAA24 | MP (MONOPTEROS); transcription factor | chr1:6887353-6891182 FORWARDnearly identical (1387) loc\_os04g56850 12004.m78925 protein auxin response factor family protein, expressed seq=cds; coord=10:147118003..147123097:-1; parent\_gene=GRMZM2G086949'

'weakly similar to ( 120) AT1G78690 | Symbols: | phospholipid/glycerol acyltransferase family protein | chr1:29597002-29598409 FORWARDweakly similar to ( 161) loc\_os04g57150 12004.m35502 protein tafazzin, putative, expressed seq=cds; coord=10:147206883..147213776:-1; parent\_gene=GRMZM2G125083'

'moderately similar to ( 207) AT1G65840 | Symbols: ATPAO4, PAO4 | ATPAO4 (ARABIDOPSIS THALIANA POLYAMINE OXIDASE 4); amine oxidase/ polyamine oxidase | chr1:24490173-24492728 FORWARDmoderately similar to ( 274) loc\_os04g57560 12004.m10641 protein lysine-specific histone demethylase 1, putative, expressed seq=cds; coord=10:147594420..147597270:-1; parent\_gene=GRMZM2G150248'

'highly similar to ( 648) AT4G04955 | Symbols: ATALN | ATALN (Arabidopsis allantoinase); allantoinase/ hydrolase | chr4:2522301-2525259 REVERSEmoderately similar to ( 342) loc\_os04g58390 12004.m10721 protein allantoinase, putative, expressed seq=cds; coord=10:148502046..148506482:1; parent\_gene=GRMZM2G173413'

'highly similar to ( 809) AT1G63660 | Symbols: | GMP synthase (glutamine-hydrolyzing), putative / glutamine amidotransferase, putative | chr1:23604874-23607080 REVERSEhighly similar to ( 972) loc\_os08g23730 12008.m06393 protein GMP synthase, putative, expressed seq=cds; coord=10:149089396..149092794:1; parent\_gene=GRMZM2G136283'

'moderately similar to ( 419) AT3G13620 | Symbols: | amino acid permease family protein | chr3:4450904-4452556 REVERSEhighly similar to ( 600) loc\_os03g25920 12003.m07936 protein cationic amino acid transporter, putative seq=cds; coord=1:64964613..64967070:-1; parent\_gene=GRMZM2G127138'

'moderately similar to ( 419) AT3G13620 | Symbols: | amino acid permease family protein | chr3:4450904-4452556 REVERSEhighly similar to ( 600) loc\_os03g25920 12003.m07936 protein cationic amino acid transporter, putative seq=cds; coord=1:64964613..64967070:-1; parent\_gene=GRMZM2G127138'

'very weakly similar to (89.0) loc\_os06g47340 12006.m09260 protein glycosyltransferase, putative, expressed seq=cds; coord=1:70503212..70503722:1; parent\_gene=GRMZM2G123872'

'very weakly similar to (89.0) loc\_os06g47340 12006.m09260 protein glycosyltransferase, putative, expressed seq=cds; coord=1:70503212..70503722:1; parent\_gene=GRMZM2G123872'

'moderately similar to ( 431) AT4G24220 | Symbols: VEP1, AWI31 | VEP1 (VEIN PATTERNING 1); binding / catalytic | chr4:12565219-12566474 FORWARDhighly similar to ( 581) loc\_os03g32170 12003.m08461 protein progesterone 5-beta-reductase, putative, expressed seq=cds; coord=1:76234318..76235779:-1; parent\_gene=GRMZM2G075892'

'moderately similar to ( 341) AT4G34380 | Symbols: | transducin family protein / WD-40 repeat family protein | chr4:16438835-16440322 FORWARDmoderately similar to ( 479) loc\_os03g42710 12003.m09323 protein nucleotide binding protein, putative seq=cds; coord=1:253911424..253913528:-1; parent\_gene=GRMZM2G099023'

'moderately similar to ( 495) AT5G61540 | Symbols: | L-asparaginase, putative / L-asparagine amidohydrolase, putative | chr5:24745887-24747142 FORWARDhighly similar to ( 624) loc\_os04g46370 12004.m101606 protein L-asparaginase 3 precursor, putative, expressed seq=cds; coord=2:20195602..20205929:1; parent\_gene=GRMZM2G139463'

'moderately similar to ( 219) AT1G68920 | Symbols: | basic helix-loop-helix (bHLH) family protein | chr1:25915620-25917675 FORWARDmoderately similar to ( 482) loc\_os09g29830 12009.m06134 protein DNA binding protein, putative, expressed seq=cds; coord=2:188403767..188407063:1; parent\_gene=GRMZM2G137541'

'very weakly similar to (94.4) AT2G35270 | Symbols: | DNA-binding protein-related | chr2:14857021-14857878 FORWARDweakly similar to ( 150) loc\_os01g14430 12001.m08048 protein DNA binding protein, putative, expressed seq=cds; coord=3:1289442..1290365:1; parent\_gene=AC233880.1\_FG005'

'very weakly similar to (92.0) AT3G17510 | Symbols: CIPK1, SnRK3.16 | CIPK1 (CBL-INTERACTING PROTEIN KINASE 1); kinase/ protein binding | chr3:5989309-5992627 REVERSEvery weakly similar to (97.1) loc\_os05g04550 12005.m04988 protein CBL-interacting serine/threonine-protein kinase 1, putative, expressed seq=cds; coord=3:131847059..131848547:1; parent\_gene=AC206425.3\_FG004'

'very weakly similar to (92.0) AT3G17510 | Symbols: CIPK1, SnRK3.16 | CIPK1 (CBL-INTERACTING PROTEIN KINASE 1); kinase/ protein binding | chr3:5989309-5992627 REVERSEvery weakly similar to (97.1) loc\_os05g04550 12005.m04988 protein CBL-interacting serine/threonine-protein kinase 1, putative, expressed seq=cds; coord=3:131847059..131848547:1; parent\_gene=AC206425.3\_FG004'

'moderately similar to ( 327) AT5G39850 | Symbols: | 40S ribosomal protein S9 (RPS9C) | chr5:15950053-15951171 FORWARDweakly similar to ( 110) RS9\_TOBAC 40S ribosomal protein S9 (S4) (Fragment) - Nicotiana tabacum (Common tobacco)moderately similar to ( 354) loc\_os11g38959 12011.m80083 protein 40S ribosomal protein S9, putative, expressed seq=cds; coord=3:135594596..135597030:-1; parent\_gene=GRMZM2G108348'

'weakly similar to ( 144) AT5G22330 | Symbols: ATTIP49A, RIN1 | RIN1 (RESISTANCE TO PSEUDOMONAS SYRINGAE PV MACULICOLA INTERACTOR 1); protein binding | chr5:7391026-7394071 REVERSEweakly similar to ( 171) loc\_os07g08170 12007.m05274 protein ruvB-like 1, putative, expressed seq=cds; coord=3:181698730..181700453:-1; parent\_gene=GRMZM2G359230'

'weakly similar to ( 101) AT1G67750 | Symbols: | pectate lyase family protein | chr1:25401660-25403165 FORWARDweakly similar to ( 111) loc\_os04g05050 12004.m35243 protein pectate lyase 8 precursor, putative, expressed seq=cds; coord=3:188017138..188020110:-1; parent\_gene=AC213654.3\_FG006'

'very weakly similar to (90.1) AT4G26090 | Symbols: RPS2 | RPS2 (RESISTANT TO P. SYRINGAE 2); protein binding | chr4:13224596-13227325 FORWARDmoderately similar to ( 332) loc\_os01g58530 12001.m11995 protein Leucine Rich Repeat family protein, expressed seq=cds; coord=3:188374974..188376493:-1; parent\_gene=GRMZM2G047652'

'moderately similar to ( 306) AT5G54500 | Symbols: FQR1 | FQR1 (FLAVODOXIN-LIKE QUINONE REDUCTASE 1); FMN binding / oxidoreductase, acting on NADH or NADPH, quinone or similar compound as acceptor | chr5:22124674-22126256 FORWARDmoderately similar to ( 362) loc\_os01g57570 12001.m43222 protein minor allergen Alt a 7, putative, expressed seq=cds; coord=3:190321122..190324751:-1; parent\_gene=GRMZM2G138800'

'weakly similar to ( 174) AT1G29520 | Symbols: | AWPM-19-like membrane family protein | chr1:10323735-10324525 FORWARDmoderately similar to ( 229) loc\_os01g50440 12001.m11226 protein plasma membrane associated protein, putative, expressed seq=cds; coord=3:205294776..205296372:-1; parent\_gene=GRMZM2G057283'

'weakly similar to ( 163) AT5G55340 | Symbols: | long-chain-alcohol O-fatty-acyltransferase family protein / wax synthase family protein | chr5:22439985-22440986 REVERSEmoderately similar to ( 475) loc\_os01g46270 12001.m10825 protein wax synthase isoform 3, putative, expressed seq=cds; coord=3:213797343..213799289:-1; parent\_gene=GRMZM2G349407'

'weakly similar to ( 163) AT5G55340 | Symbols: | long-chain-alcohol O-fatty-acyltransferase family protein / wax synthase family protein | chr5:22439985-22440986 REVERSEmoderately similar to ( 475) loc\_os01g46270 12001.m10825 protein wax synthase isoform 3, putative, expressed seq=cds; coord=3:213797343..213799289:-1; parent\_gene=GRMZM2G349407'

'weakly similar to ( 178) AT2G01430 | Symbols: ATHB17, ATHB-17 | ATHB17 (ARABIDOPSIS THALIANA HOMEBOX-LEUCINE ZIPPER PROTEIN 17); transcription factor | chr2:187798-190369 REVERSEmoderately similar to ( 291) loc\_os01g45570 12001.m10759 protein homeobox-leucine zipper protein ATHB-4, putative, expressed seq=cds; coord=3:214857327..214861719:1; parent\_gene=GRMZM2G126239'

'highly similar to ( 538) AT4G16745 | Symbols: | exostosin family protein | chr4:9412185-9414053 FORWARDhighly similar to ( 709) loc\_os01g45350 12001.m10738 protein limonene cyclase like protein, putative, expressed seq=cds; coord=3:215380332..215382314:-1; parent\_gene=GRMZM2G048010'

'moderately similar to ( 245) AT5G14740 | Symbols: CA2, CA18, BETA CA2 | CA2 (CARBONIC ANHYDRASE 2); carbonate dehydratase/ zinc ion binding | chr5:4758257-4762315 FORWARDmoderately similar to ( 340) CAHC\_HORVU Carbonic anhydrase, chloroplast precursor (EC 4.2.1.1) (Carbonate dehydratase) - Hordeum vulgare (Barley)moderately similar to ( 340) loc\_os01g45274 12001.m150428 protein carbonic anhydrase, chloroplast precursor, putative, expressed seq=cds; coord=3:215466579..215473931:-1; parent\_gene=GRMZM2G121878'

'moderately similar to ( 454) AT2G25910 | Symbols: | 3'-5' exonuclease domain-containing protein / K homology domain-containing protein / KH domain-containing protein | chr2:11049379-11051997 REVERSEhighly similar to ( 542) loc\_os01g38620 12001.m43061 protein 3-5 exonuclease/ nucleic acid binding protein, putative, expressed seq=cds; coord=3:219191471..219198169:-1; parent\_gene=GRMZM2G081924'

'highly similar to ( 874) AT4G26590 | Symbols: ATOPT5, OPT5 | OPT5 (OLIGOPEPTIDE TRANSPORTER 5); oligopeptide transporter | chr4:13414134-13416850 REVERSEnearly identical (1185) loc\_os08g23130 12008.m080127 protein oligopeptide transporter 5, putative, expressed seq=cds; coord=4:169011560..169014163:1; parent\_gene=GRMZM2G019209'

'highly similar to ( 673) AT2G37710 | Symbols: RLK | RLK (receptor lectin kinase); kinase | chr2:15814934-15816961 REVERSEmoderately similar to ( 208) PSKR\_DAUCA Phytosulfokine receptor precursor (EC 2.7.11.1) (Phytosulfokine LRR receptor kinase) - Daucus carota (Carrot)highly similar to ( 815) loc\_os07g03830 12007.m04853 protein lectin-like receptor kinase 7, putative seq=cds; coord=4:221759308..221761618:-1; parent\_gene=GRMZM2G142037'

'highly similar to ( 809) AT5G53130 | Symbols: CNGC1, ATCNGC1 | CNGC1 (CYCLIC NUCLEOTIDE GATED CHANNEL 1); calmodulin binding / cation channel/ cyclic nucleotide binding / intracellular cyclic nucleotide activated cation channel/ inward rectifier potassium channel | chr5:21537830-21540490 REVERSEhighly similar to ( 959) loc\_os06g33570 12006.m07894 protein cyclic nucleotide-gated ion channel 1, putative, expressed seq=cds; coord=4:225259158..225269632:1; parent\_gene=GRMZM2G148118'

'weakly similar to ( 162) AT4G30220 | Symbols: RUXF | RUXF (SMALL NUCLEAR RIBONUCLEOPROTEIN F) | chr4:14803100-14804259 REVERSEweakly similar to ( 176) loc\_os11g43620 12011.m28864 protein small nuclear ribonucleoprotein F, putative, expressed seq=cds; coord=5:89314594..89320408:-1; parent\_gene=GRMZM2G058252'

'highly similar to ( 518) AT4G31860 | Symbols: | protein phosphatase 2C, putative / PP2C, putative | chr4:15406685-15408589 REVERSEhighly similar to ( 598) loc\_os02g08364 12002.m100028 protein protein phosphatase 2C isoform gamma, putative, expressed seq=cds; coord=5:91798187..91814550:1; parent\_gene=GRMZM2G360455'  
'highly similar to ( 799) AT2G28260 | Symbols: ATCNGC15, CNGC15 | ATCNGC15; calmodulin binding / cation channel/ cyclic nucleotide binding | chr2:12049989-12052453 FORWARDnearly identical (1106) loc\_os02g41710 12002.m09208 protein cyclic nucleotide-gated ion channel 15, putative, expressed seq=cds; coord=5:186838856..186841594:-1; parent\_gene=GRMZM2G068904'

'weakly similar to ( 152) AT2G20880 | Symbols: | AP2 domain-containing transcription factor, putative | chr2:8986053-8987063 FORWARDvery weakly similar to (87.4) ERF1\_ORYSA Ethylene-responsive transcription factor 1 (Ethylene-responsive element-binding factor 1) (EREBP-1) (OsEREBP1) - Oryza sativa (Rice)moderately similar to ( 266) loc\_os04g44670 12004.m09426 protein AP2 domain containing protein, expressed seq=cds; coord=5:188666370..188668441:-1; parent\_gene=GRMZM2G139765'

'weakly similar to ( 148) loc\_os02g43120 12002.m09347 protein RING-H2 finger protein ATLII, putative, expressed seq=cds; coord=5:189906521..189907598:-1; parent\_gene=GRMZM2G409372'

'moderately similar to ( 494) AT5G23810 | Symbols: AAP7 | AAP7; amino acid transmembrane transporter | chr5:8028461-8030138 FORWARDhighly similar to ( 677) loc\_os02g49060 12002.m09940 protein AAP7, putative, expressed seq=cds; coord=5:204062211..204065565:1; parent\_gene=GRMZM2G161641'



'moderately similar to ( 329) AT1G69530 | Symbols: ATEXPA1, EXP1, AT-EXP1, ATEXP1, ATHEXP ALPHA 1.2 | ATEXPA1 (ARABIDOPSIS THALIANA EXPANSIN A1) | chr1:26142034-26143200 FORWARDmoderately similar to ( 395) EXPA5\_ORYSA Expansin-A5 precursor (OsEXPA5) (Alpha-expansin-5) (OsEXP5) (OsaEXPa1.20) - Oryza sativa (Rice)moderately similar to ( 395) loc\_os02g51040 12002.m10138 protein alpha-expansin 15 precursor, putative, expressed seq=cds; coord=5:206838596..206840547:1; parent\_gene=GRMZM2G105844'

'weakly similar to ( 150) AT1G69690 | Symbols: | TCP family transcription factor, putative | chr1:26216449-26217426 FORWARDmoderately similar to ( 317) loc\_os02g51280 12002.m10162 protein TCP-domain protein, putative, expressed seq=cds; coord=5:207135266..207137587:1; parent\_gene=GRMZM2G077755'

'weakly similar to ( 140) AT5G27420 | Symbols: | zinc finger (C3HC4-type RING finger) family protein | chr5:9684119-9685225 FORWARDvery weakly similar to (83.2) EL5\_ORYSA E3 ubiquitin-protein ligase EL5 (EC 6.3.2.-) - Oryza sativa (Rice)moderately similar to ( 263) loc\_os02g52210 12002.m10252 protein RING/C3HC4/PHD zinc finger-like protein, putative, expressed seq=cds; coord=5:208925097..208929323:1; parent\_gene=GRMZM2G323013'

'weakly similar to ( 169) AT2G19130 | Symbols: | S-locus lectin protein kinase family protein | chr2:8293789-8296275 FORWARDweakly similar to ( 130) KPRO\_MAIZE Putative receptor protein kinase ZmPK1 precursor (EC 2.7.11.1) - Zea mays (Maize)moderately similar to ( 202) loc\_os07g08860 12007.m05342 protein S-domain receptor-like protein kinase, putative seq=cds; coord=6:33477184..33478109:-1; parent\_gene=GRMZM2G179270'

'moderately similar to ( 244) AT3G01410 | Symbols: | RNase H domain-containing protein | chr3:153650-155439 REVERSEmoderately similar to ( 380) loc\_os08g08050 12008.m04940 protein retrotransposon protein, putative, Ty3-gypsy subclass seq=cds; coord=6:43497340..43503135:1; parent\_gene=GRMZM2G124509'

'weakly similar to ( 181) AT2G43190 | Symbols: | ribonuclease P family protein | chr2:17956220-17957833 FORWARDmoderately similar to ( 438) loc\_os05g39530 12005.m083751 protein ribonuclease P/ ribonuclease, putative, expressed seq=cds; coord=6:74035080..74038340:-1; parent\_gene=GRMZM2G047265'

'weakly similar to ( 136) AT4G31410 | Symbols: | unknown protein | chr4:15244259-15245474 FORWARDmoderately similar to ( 288) loc\_os06g47860 12006.m31919 protein expressed protein seq=cds; coord=6:74144320..74146448:-1; parent\_gene=GRMZM2G430152'

'weakly similar to ( 136) AT4G31410 | Symbols: | unknown protein | chr4:15244259-15245474 FORWARDmoderately similar to ( 288) loc\_os06g47860 12006.m31919 protein expressed protein seq=cds; coord=6:74144320..74146448:-1; parent\_gene=GRMZM2G430152'

'moderately similar to ( 480) AT4G01030 | Symbols: | pentatricopeptide (PPR) repeat-containing protein | chr4:448336-449838 REVERSEweakly similar to ( 116) RF1\_ORYSA Rf1 protein, mitochondrial precursor (PPR protein) (Fertility restorer) (Restorer for CMS) - Oryza sativa (Rice)nearly identical (1134) loc\_os05g50950 12005.m09162 protein pentatricopeptide repeat protein PPR986-12, putative, expressed seq=cds; coord=6:168066381..168069793:-1; parent\_gene=GRMZM2G440349'

'moderately similar to ( 480) AT4G01030 | Symbols: | pentatricopeptide (PPR) repeat-containing protein | chr4:448336-449838 REVERSEweakly similar to ( 116) RF1\_ORYSA Rf1 protein, mitochondrial precursor (PPR protein) (Fertility restorer) (Restorer for CMS) - *Oryza sativa* (Rice)nearly identical (1134) loc\_os05g50950.12005.m09162 protein pentatricopeptide repeat protein PPR986-12, putative, expressed seq=cds; coord=6:168066381..168069793:-1; parent\_gene=GRMZM2G440349'

'highly similar to ( 593) AT1G30510 | Symbols: ATRFNR2 | ATRFNR2 (ROOT FNR 2); FAD binding / NADP or NADPH binding / electron carrier/ ferredoxin-NADP

'moderately similar to ( 358) AT5G24090 | Symbols: | acidic endochitinase (CHIB1) | chr5:8143805-8145153 REVERSEmoderately similar to ( 379) CHIA\_TOBAC Acidic endochitinase precursor (EC 3.2.1.14) - *Nicotiana tabacum* (Common tobacco)moderately similar to ( 495) loc\_os07g19040.12007.m06343 protein acidic endochitinase precursor, putative seq=cds; coord=7:31446367..31447379:1; parent\_gene=GRMZM2G080547'

'moderately similar to ( 239) AT4G35335 | Symbols: | nucleotide-sugar transmembrane transporter/ sugar:hydrogen symporter | chr4:16807286-16810015 FORWARDmoderately similar to ( 254) loc\_os07g38610.12007.m08106 protein UDP-galactose translocator, putative, expressed seq=cds; coord=7:159863258..159865012:-1; parent\_gene=GRMZM2G007909'

'highly similar to ( 649) AT1G18670 | Symbols: IBS1 | IBS1 (IMPAIRED IN BABA-INDUCED STERILITY 1); ATP binding / kinase/ protein kinase/ protein serine/threonine kinase/ protein tyrosine kinase | chr1:6427242-6430696 REVERSEmoderately similar to ( 220) CDC2\_VIGUN Cell division control protein 2 homolog (EC 2.7.11.22) (EC 2.7.11.23) (p34cdc2) - *Vigna unguiculata* (Cowpea)highly similar to ( 956) loc\_os07g40550.12007.m29001 protein transposon protein, putative, unclassified, expressed seq=cds; coord=7:162983903..162989308:-1; parent\_gene=GRMZM2G432796'

'highly similar to ( 980) AT3G02130 | Symbols: RPK2, TOAD2 | RPK2 (RECEPTOR-LIKE PROTEIN KINASE 2); ATP binding / kinase/ protein serine/threonine kinase | chr3:381224-384181 FORWARDmoderately similar to ( 391) PSKR\_DAUCA Phytosulfokine receptor precursor (EC 2.7.11.1) (Phytosulfokine LRR receptor kinase) - *Daucus carota* (Carrot)nearly identical (1607) loc\_os07g41140.12007.m08350 protein receptor-like protein kinase precursor, putative, expressed seq=cds; coord=7:163778995..163782507:1; parent\_gene=GRMZM2G017409'

'moderately similar to ( 379) AT4G38180 | Symbols: FRS5 | FRS5 (FAR1-related sequence 5); zinc ion binding | chr4:17906702-17909404 REVERSEnearly identical (1313) loc\_os07g42400.12007.m29004 protein transposon protein, putative, unclassified, expressed seq=cds; coord=7:165466726..165470875:1; parent\_gene=GRMZM2G114461'

'moderately similar to ( 390) AT2G47180 | Symbols: AtGolS1 | AtGolS1 (*Arabidopsis thaliana* galactinol synthase 1); transferase, transferring glycosyl groups / transferase, transferring hexosyl groups | chr2:19369049-19370372 REVERSEmoderately similar to ( 411) loc\_os07g48830.12007.m09092 protein galactinol synthase 3, putative, expressed seq=cds; coord=7:174158639..174179366:1; parent\_gene=GRMZM2G361984'

'moderately similar to ( 239) AT5G11900 | Symbols: | eukaryotic translation initiation factor SUI1 family protein | chr5:3834154-3836023 FORWARDmoderately similar to ( 287) loc\_os01g09890.12001.m07613 protein density-regulated protein, putative, expressed seq=cds; coord=8:21874081..21876830:1; parent\_gene=GRMZM2G033283'

'highly similar to ( 537) AT3G61790 | Symbols: | seven in absentia (SINA) family protein | chr3:22871974-22873543 REVERSEweakly similar to ( 149) SINAL\_DROME Probable E3 ubiquitin-protein ligase sina-like CG13030 (EC 6.3.2.-) - Drosophila melanogaster (Fruit fly)highly similar to ( 607) loc\_os05g14860 12005.m05897 protein ubiquitin ligase SINAT3, putative, expressed seq=cds; coord=8:110374175..110378712:-1; parent\_gene=GRMZM2G101852'

'moderately similar to ( 376) AT3G07070 | Symbols: | protein kinase family protein | chr3:2238455-2240074 FORWARDmoderately similar to ( 207) NORK\_PEA Nodulation receptor kinase precursor (EC 2.7.11.1) - Pisum sativum (Garden pea)highly similar to ( 534) loc\_os05g38770 12005.m08056 protein protein kinase APK1B, chloroplast precursor, putative, expressed seq=cds; coord=8:117194313..117197273:-1; parent\_gene=GRMZM2G090732'

moderately similar to ( 207) AT3G53020 | Symbols: STV1, RPL24B, RPL24 | STV1 (SHORT VALVE1); structural constituent of ribosome | chr3:19660749-19661912 REVERSEmoderately similar to ( 218) RL24\_HORVU 60S ribosomal protein L24 - Hordeum vulgare (Barley)moderately similar to ( 224) loc\_os05g40820 12005.m083765 protein 60S ribosomal protein L24, putative, expressed seq=cds; coord=8:119372356..119376074:-1; parent\_gene=GRMZM2G142640'

'moderately similar to ( 243) AT1G23380 | Symbols: KNAT6, KNAT6L, KNAT6S | KNAT6; DNA binding / transcription activator/ transcription factor | chr1:8297499-8302492 REVERSEmoderately similar to ( 226) RSH1\_MAIZE Homeobox protein rough sheath 1 - Zea mays (Maize)moderately similar to ( 384) loc\_os05g03884 12005.m04922 protein homeotic protein knotted-1, putative, expressed seq=cds; coord=8:130850435..130856001:1; parent\_gene=GRMZM2G094241'

'highly similar to ( 583) AT3G55270 | Symbols: MKP1, ATMKP1 | MKP1 (MITOGEN-ACTIVATED PROTEIN KINASE PHOSPHATASE 1); MAP kinase tyrosine/serine/threonine phosphatase | chr3:20496775-20499408 FORWARDvery weakly similar to (85.5) PTP3\_CHLEU Dual specificity protein phosphatase (EC 3.1.3.48) (EC 3.1.3.16) - Chlamydomonas eugametoshhighly similar to ( 685) loc\_os05g02500 12005.m64196 protein MAP kinase phosphatase, putative, expressed seq=cds; coord=8:133181699..133186955:1; parent\_gene=GRMZM2G005350'

'weakly similar to ( 188) AT3G07340 | Symbols: | basic helix-loop-helix (bHLH) family protein | chr3:2341188-2343288 REVERSEhighly similar to ( 584) loc\_os01g68700 12001.m12972 protein BHLH transcription factor, putative, expressed seq=cds; coord=8:162557420..162560479:1; parent\_gene=GRMZM2G030762'

'moderately similar to ( 477) AT5G22850 | Symbols: | aspartyl protease family protein | chr5:7633717-7636298 REVERSEweakly similar to ( 111) ASP1\_ORYSA Aspartic proteinase Asp1 precursor (EC 3.4.23.-) (OsAsp1) (OSAP1) (Nucellin-like protein) - Oryza sativa (Rice)highly similar to ( 702) loc\_os01g56930 12001.m150738 protein aspartic proteinase nepenthesin-2 precursor, putative, expressed seq=cds; coord=8:172223115..172227824:-1; parent\_gene=GRMZM2G133029'

'moderately similar to ( 310) AT5G45775 | Symbols: | 60S ribosomal protein L11 (RPL11D) | chr5:18565281-18566496 REVERSEmoderately similar to ( 321) RL11\_ORYSA 60S ribosomal protein L11 - Oryza sativa (Rice)moderately similar to ( 322) loc\_os02g14059 12002.m77785 protein 60S ribosomal protein L11-1, putative, expressed seq=cds; coord=9:77021422..77026624:1; parent\_gene=GRMZM2G001816'

'moderately similar to ( 491) AT5G26040 | Symbols: HDA2 | HDA2; histone deacetylase | chr5:9099321-9101598 REVERSEEvery weakly similar to (93.2) HDAC\_MAIZE Probable histone deacetylase (RPD3 homolog) - Zea mays (Maize)highly similar to ( 582) loc\_os06g37420 12006.m091722 protein histone deacetylase 11, putative, expressed seq=cds; coord=9:79411227..79415471:-1; parent\_gene=GRMZM2G008425'

'weakly similar to ( 154) AT5G23710 | Symbols: | DNA binding / DNA-directed RNA polymerase | chr5:7996528-7997220 REVERSEmoderately similar to ( 261) loc\_os06g40110 12006.m08547 protein RNA polymerase Rpc34 subunit family protein, expressed seq=cds; coord=9:89198117..89199404:-1; parent\_gene=GRMZM2G058336'

'moderately similar to ( 362) AT3G57670 | Symbols: NTT | NTT (NO TRANSMITTING TRACT); nucleic acid binding / transcription factor/ zinc ion binding | chr3:21370936-21373121 FORWARDmoderately similar to ( 430) loc\_os06g40960 12006.m08631 protein zinc finger protein, putative, expressed seq=cds; coord=9:101771087..101774624:-1; parent\_gene=GRMZM2G436344'

'weakly similar to ( 190) AT1G65680 | Symbols: ATEXPB2, EXPB2, ATHEXP BETA 1.4 | ATEXPB2 (ARABIDOPSIS THALIANA EXPANSIN B2) | chr1:24427266-24428399 FORWARDmoderately similar to ( 332) EXPB6\_ORYSA Expansin-B6 precursor (OsEXPB6) (Beta-expansin-6) (OsaEXPb1.8) - Oryza sativa (Rice)moderately similar to ( 332) loc\_os10g40700 12010.m06838 protein beta-expansin 1a precursor, putative, expressed seq=cds; coord=9:116443796..116445318:1; parent\_gene=GRMZM2G059785'

'very weakly similar to (99.4) AT2G45120 | Symbols: | zinc finger (C2H2 type) family protein | chr2:18603680-18604624 FORWARDweakly similar to ( 197) loc\_os10g40660 12010.m06836 protein cys2/His2 zinc-finger transcription factor, putative, expressed seq=cds; coord=9:116896122..116897766:1; parent\_gene=GRMZM2G152214'

'moderately similar to ( 479) AT5G23870 | Symbols: | pectinacylesterase family protein | chr5:8046309-8049999 REVERSEmoderately similar to ( 422) loc\_os07g44070 12007.m29010 protein carboxylic ester hydrolase, putative, expressed seq=cds; coord=9:117322363..117325885:1; parent\_gene=GRMZM2G117999'

'weakly similar to ( 188) AT3G51850 | Symbols: CPK13 | CPK13; ATP binding / calcium ion binding / calmodulin-dependent protein kinase/ kinase/ protein kinase/ protein serine/threonine kinase/ protein tyrosine kinase | chr3:19232667-19235526 FORWARDweakly similar to ( 129) CDPK2\_MAIZE Calcium-dependent protein kinase 2 (EC 2.7.11.1) (CDPK 2) - Zea mays (Maize)moderately similar to ( 210) loc\_os01g61590 12001.m12285 protein calcium-dependent protein kinase, isoform AK1, putative, expressed seq=cds; coord=9:125057730..125059364:-1; parent\_gene=GRMZM2G047546'

'moderately similar to ( 298) AT1G75560 | Symbols: | zinc knuckle (CCHC-type) family protein | chr1:28371420-28372717 REVERSEmoderately similar to ( 481) loc\_os10g39820 12010.m06753 protein DNA-binding protein HEXBP, putative, expressed seq=cds; coord=9:126504746..126511455:-1; parent\_gene=GRMZM2G127340'

'moderately similar to ( 436) AT4G33860 | Symbols: | glycosyl hydrolase family 10 protein | chr4:16230142-16232309 REVERSEhighly similar to ( 684) loc\_os03g10440 12003.m06497 protein 1,4-beta-xylanase, putative, expressed seq=cds; coord=9:147979786..147981553:-1; parent\_gene=GRMZM2G048375'

'moderately similar to ( 239) AT3G62240 | Symbols: | zinc finger (C2H2 type) family protein | chr3:23033592-23036653 REVERSEmoderately similar to ( 327) loc\_os01g14840 12001.m08086 protein nucleic acid binding protein, putative, expressed seq=cds; coord=9:149278522..149280901:-1; parent\_gene=GRMZM2G004157'

'highly similar to ( 636) AT1G77380 | Symbols: AAP3, ATAAP3 | AAP3; amino acid transmembrane transporter | chr1:29075201-29077252 REVERSEhighly similar to ( 796) loc\_os12g08090 12012.m04796 protein amino acid transporter, putative, expressed seq=cds; coord=10:11081436..11083714:1; parent\_gene=GRMZM2G076593'

'moderately similar to ( 310) AT1G74250 | Symbols: | DNAJ heat shock N-terminal domain-containing protein | chr1:27920328-27922414 FORWARDmoderately similar to ( 447) loc\_os12g31840 12012.m06992 protein heat shock protein binding protein, putative, expressed seq=cds; coord=10:16928881..16930864:-1; parent\_gene=GRMZM2G170027'

'moderately similar to ( 279) AT1G15820 | Symbols: LHCB6, CP24 | LHCB6 (LIGHT HARVESTING COMPLEX PSII SUBUNIT 6); chlorophyll binding | chr1:5446685-5447676 REVERSEmoderately similar to ( 282) CB4\_SPIOL Chlorophyll a-b binding protein CP24, chloroplast precursor - Spinacia oleracea (Spinach)moderately similar to ( 289) loc\_os04g38410 12004.m08831 protein chlorophyll a-b binding protein CP24, chloroplast precursor, putative, expressed seq=cds; coord=10:147890562..147891878:1; parent\_gene=GRMZM2G092427'

'weakly similar to ( 172) AT5G22250 | Symbols: | CCR4-NOT transcription complex protein, putative | chr5:7365605-7366441 REVERSEmoderately similar to ( 209) loc\_os04g58810 12004.m10761 protein CCR4-NOT transcription complex subunit 8, putative, expressed seq=cds; coord=10:148762274..148766456:1; parent\_gene=GRMZM2G177340'

'weakly similar to ( 157) AT3G44220 | Symbols: | harpin-induced family protein / HIN1 family protein / harpin-responsive family protein | chr3:15928216-15929645 FORWARDmoderately similar to ( 282) loc\_os04g58860 12004.m10766 protein VAMP protein SEC22, putative, expressed seq=cds; coord=10:148832965..148833998:-1; parent\_gene=GRMZM2G406119'

'moderately similar to ( 297) AT1G76920 | Symbols: | F-box family protein (FBX3) | chr1:28892295-28893419 FORWARDweakly similar to ( 104) loc\_os04g59010 12004.m10779 protein F-box domain containing protein, expressed seq=cds; coord=10:148984717..148986879:-1; parent\_gene=GRMZM2G104882'

'weakly similar to ( 135) AT2G17120 | Symbols: LYM2 | LYM2 (LYSM DOMAIN GPI-ANCHORED PROTEIN 2 PRECURSOR) | chr2:7459156-7460648 FORWARDmoderately similar to ( 219) loc\_os03g04110 12003.m101179 protein receptor-like GPI-anchored protein 2, putative, expressed seq=cds; coord=1:7566218..7567090:1; parent\_gene=GRMZM2G410991'

'moderately similar to ( 455) AT1G15170 | Symbols: | MATE efflux family protein | chr1:5220690-5222756 FORWARDhighly similar to ( 719) loc\_os01g31980 12001.m150603 protein transparent testa 12 protein, putative, expressed seq=cds; coord=1:17383726..17395138:1; parent\_gene=GRMZM2G115105'

'weakly similar to ( 152) AT3G59650 | Symbols: | mitochondrial ribosomal protein L51/S25/CI-B8 family protein | chr3:22033216-22033928 FORWARDweakly similar to ( 182) loc\_os03g10930 12003.m06545 protein mitochondrial ribosomal protein L43, putative, expressed seq=cds; coord=1:21456899..21461749:1; parent\_gene=GRMZM2G004259'

'weakly similar to ( 152) AT3G59650 | Symbols: | mitochondrial ribosomal protein L51/S25/CI-B8 family protein | chr3:22033216-22033928 FORWARDweakly similar to ( 182) loc\_os03g10930 12003.m06545 protein mitochondrial ribosomal protein L43, putative, expressed seq=cds; coord=1:21456899..21461749:1; parent\_gene=GRMZM2G004259'

'weakly similar to ( 109) AT2G28710 | Symbols: | zinc finger (C2H2 type) family protein | chr2:12322974-12323444 FORWARDmoderately similar to ( 208) loc\_os03g17150 12003.m07146 protein ZFP16-1, putative, expressed seq=cds; coord=1:42121563..42122262:-1; parent\_gene=GRMZM2G048154'

'moderately similar to ( 484) AT5G01340 | Symbols: | mitochondrial substrate carrier family protein | chr5:143240-144561 REVERSEhighly similar to ( 553) loc\_os03g18160 12003.m07241 protein tricarboxylate transport protein, mitochondrial precursor, putative, expressed seq=cds; coord=1:45400061..45402643:1; parent\_gene=AC208201.3\_FG001'

'moderately similar to ( 248) AT2G30260 | Symbols: U2B" | U2B" (U2 small nuclear ribonucleoprotein B); RNA binding / nucleic acid binding / nucleotide binding | chr2:12905557-12907434 REVERSEmoderately similar to ( 323) loc\_os03g18720 12003.m35175 protein spliceosomal protein, putative, expressed seq=cds; coord=1:46622335..46627171:-1; parent\_gene=GRMZM2G153450'

'moderately similar to ( 202) AT5G52840 | Symbols: | NADH-ubiquinone oxidoreductase-related | chr5:21413718-21414794 FORWARDmoderately similar to ( 260) loc\_os03g19890 12003.m07402 protein NADH-ubiquinone oxidoreductase 13 kDa-B subunit, putative, expressed seq=cds; coord=1:51013925..51015964:1; parent\_gene=GRMZM2G018941'

'highly similar to ( 506) AT2G47180 | Symbols: AtGolS1 | AtGolS1 (Arabidopsis thaliana galactinol synthase 1); transferase, transferring glycosyl groups / transferase, transferring hexosyl groups | chr2:19369049-19370372 REVERSEhighly similar to ( 588) loc\_os03g20120 12003.m07424 protein galactinol synthase 3, putative, expressed seq=cds; coord=1:51534145..51536353:1; parent\_gene=GRMZM2G165919'

'moderately similar to ( 286) AT4G16640 | Symbols: | matrix metalloproteinase, putative | chr4:9367396-9368490 REVERSEmoderately similar to ( 209) MEP1\_SOYBN Metalloendoproteinase 1 precursor (EC 3.4.24.-) (SMEP1) - Glycine max (Soybean)moderately similar to ( 441) loc\_os10g40830 12010.m06853 protein metalloendoproteinase 1 precursor, putative, expressed seq=cds; coord=1:90788877..90790064:1; parent\_gene=GRMZM2G317386'

'moderately similar to ( 201) AT1G65680 | Symbols: ATEXPB2, EXPB2, ATHEXP BETA 1.4 | ATEXPB2 (ARABIDOPSIS THALIANA EXPANSIN B2) | chr1:24427266-24428399 FORWARDhighly similar to ( 505) EXPB4\_ORYSA Expansin-B4 precursor (OsEXPB4) (Beta-expansin-4) (OsaEXPb1.7) - Oryza sativa (Rice)highly similar to ( 505) loc\_os10g40730 12010.m06841 protein beta-expansin 1a precursor, putative, expressed seq=cds; coord=1:91247118..91249938:-1; parent\_gene=GRMZM2G021621'

'moderately similar to ( 201) AT1G65680 | Symbols: ATEXPB2, EXPB2, ATHEXP BETA 1.4 | ATEXPB2 (ARABIDOPSIS THALIANA EXPANSIN B2) | chr1:24427266-24428399 FORWARDhighly similar to ( 505) EXPB4\_ORYSA Expansin-B4 precursor (OsEXPB4) (Beta-expansin-4) (OsaEXPb1.7) - Oryza sativa (Rice)highly similar to ( 505) loc\_os10g40730 12010.m06841 protein beta-expansin 1a precursor, putative, expressed seq=cds; coord=1:91247118..91249938:-1; parent\_gene=GRMZM2G021621'

'moderately similar to ( 236) AT2G42800 | Symbols: AtRLP29 | AtRLP29 (Receptor Like Protein 29); protein binding | chr2:17808157-17809545 REVERSEweakly similar to ( 122) RPK1\_IPONI Receptor-like protein kinase precursor (EC 2.7.11.1) - Ipomoea nil (Japanese morning glory) (Pharbitis nil)moderately similar to ( 320) loc\_os03g44270 12003.m09466 protein retrotransposon protein, putative, Ty1-copia subclass seq=cds; coord=1:251112471..251114311:1; parent\_gene=GRMZM2G081099'

'highly similar to ( 621) AT5G46180 | Symbols: DELTA-OAT | delta-OAT; ornithine-oxo-acid transaminase | chr5:18718766-18721271 REVERSEweakly similar to ( 115) GSA\_HORVU Glutamate-1-semialdehyde 2,1-aminomutase, chloroplast precursor (EC 5.4.3.8) (GSA) (Glutamate-1-semialdehyde aminotransferase) (GSA-AT) - Hordeum vulgare (Barley)highly similar to ( 742) loc\_os03g44150 12003.m09454 protein ornithine aminotransferase, putative, expressed seq=cds; coord=1:251088454..251096714:-1; parent\_gene=GRMZM2G080828'

'moderately similar to ( 413) AT2G37640 | Symbols: ATEXPA3, ATEXP3, ATHEXP ALPHA 1.9, EXP3 | EXP3 | chr2:15788077-15789812 REVERSEmoderately similar to ( 462) EXPA7\_ORYSA Expansin-A7 precursor (OsEXPA7) (Alpha-expansin-7) (OsEXP7) (OsaEXPa1.26) - Oryza sativa (Rice)moderately similar to ( 462) loc\_os03g60720 12003.m10961 protein alpha-expansin 6 precursor, putative, expressed seq=cds; coord=1:293628223..293631846:-1; parent\_gene=GRMZM2G368886'

'weakly similar to ( 101) AT5G67190 | Symbols: | AP2 domain-containing transcription factor, putative | chr5:26809135-26809689 REVERSEweakly similar to ( 168) loc\_os04g55520 12004.m10443 protein dehydration responsive element binding protein, putative, expressed seq=cds; coord=2:5562976..5564647:1; parent\_gene=GRMZM2G174917'

'weakly similar to ( 101) AT5G67190 | Symbols: | AP2 domain-containing transcription factor, putative | chr5:26809135-26809689 REVERSEweakly similar to ( 168) loc\_os04g55520 12004.m10443 protein dehydration responsive element binding protein, putative, expressed seq=cds; coord=2:5562976..5564647:1; parent\_gene=GRMZM2G174917'

'very weakly similar to (93.2) loc\_os04g45690 12004.m09520 protein salt tolerance-like protein, putative, expressed seq=cds; coord=2:21903375..21906486:-1; parent\_gene=GRMZM2G131982'

'moderately similar to ( 361) AT4G16563 | Symbols: | aspartyl protease family protein | chr4:9329933-9331432 REVERSEhighly similar to ( 550) loc\_os04g45270 12004.m09480 protein pepsin A, putative, expressed seq=cds; coord=2:22946935..22949075:1; parent\_gene=GRMZM2G003784'

'weakly similar to ( 189) AT2G28350 | Symbols: ARF10 | ARF10 (AUXIN RESPONSE FACTOR 10); miRNA binding / transcription factor | chr2:12114331-12116665 FORWARDmoderately similar to ( 234) loc\_os04g43910 12004.m09350 protein auxin response factor 16, putative, expressed seq=cds; coord=2:27979219..27980618:-1; parent\_gene=GRMZM2G122614'

'moderately similar to ( 351) AT4G26090 | Symbols: RPS2 | RPS2 (RESISTANT TO P. SYRINGAE 2); protein binding | chr4:13224596-13227325 FORWARDnearly identical (1111) loc\_os04g43440 12004.m09307 protein NB-ARC domain containing protein, expressed seq=cds; coord=2:28929571..28933965:-1; parent\_gene=GRMZM2G032602'

'moderately similar to ( 351) AT4G26090 | Symbols: RPS2 | RPS2 (RESISTANT TO P. SYRINGAE 2); protein binding | chr4:13224596-13227325 FORWARDnearly identical (1111) loc\_os04g43440 12004.m09307 protein NB-ARC domain containing protein, expressed seq=cds; coord=2:28929571..28933965:-1; parent\_gene=GRMZM2G032602'

'weakly similar to ( 171) ATMG01275 | Symbols: NAD1A, NAD1, ND1 | Encodes subunit of mitochondrial NAD(P)H dehydrogenase that is trans-spliced from three precursors, NAD1A, NAD1B, and NAD1C. | chrM:318004-318390 REVERSEweakly similar to ( 181) NU1M\_OENBE NADH-ubiquinone oxidoreductase chain 1 (EC 1.6.5.3) (NADH dehydrogenase subunit 1) - *Oenothera bertiana* (Bertero's evening primrose) seq=cds; coord=9:68016311..68020591:1; parent\_gene=GRMZM2G141605'

'weakly similar to ( 171) ATMG01275 | Symbols: NAD1A, NAD1, ND1 | Encodes subunit of mitochondrial NAD(P)H dehydrogenase that is trans-spliced from three precursors, NAD1A, NAD1B, and NAD1C. | chrM:318004-318390 REVERSEweakly similar to ( 181) NU1M\_OENBE NADH-ubiquinone oxidoreductase chain 1 (EC 1.6.5.3) (NADH dehydrogenase subunit 1) - *Oenothera bertiana* (Bertero's evening primrose) seq=cds; coord=9:68016311..68020591:1; parent\_gene=GRMZM2G141605'

'weakly similar to ( 171) ATMG01275 | Symbols: NAD1A, NAD1, ND1 | Encodes subunit of mitochondrial NAD(P)H dehydrogenase that is trans-spliced from three precursors, NAD1A, NAD1B, and NAD1C. | chrM:318004-318390 REVERSEweakly similar to ( 181) NU1M\_OENBE NADH-ubiquinone oxidoreductase chain 1 (EC 1.6.5.3) (NADH dehydrogenase subunit 1) - *Oenothera bertiana* (Bertero's evening primrose) seq=cds; coord=9:68016311..68020591:1; parent\_gene=GRMZM2G141605'

'highly similar to ( 624) AT1G01090 | Symbols: PDH-E1 ALPHA | PDH-E1 ALPHA (PYRUVATE DEHYDROGENASE E1 ALPHA); pyruvate dehydrogenase (acetyl-transferring) | chr1:47705-49166 REVERSEmoderately similar to ( 240) ODPA\_SOLTU Pyruvate dehydrogenase E1 component subunit alpha, mitochondrial precursor (EC 1.2.4.1) (PDHE1-A) - *Solanum tuberosum* (Potato)highly similar to ( 725) loc\_os04g02900 12004.m101452 protein pyruvate dehydrogenase E1 component alpha subunit, putative, expressed seq=cds; coord=2:110896551..110900469:-1; parent\_gene=GRMZM2G033894'

'very weakly similar to (89.7) AT1G29450 | Symbols: | auxin-responsive protein, putative | chr1:10305981-10306406 REVERSEweakly similar to ( 179) loc\_os09g37470 12009.m06694 protein OsSAUR52 - Auxin-responsive SAUR gene family member, expressed seq=cds; coord=2:197145274..197145964:1; parent\_gene=GRMZM2G151656'

'very weakly similar to (86.7) AT4G31460 | Symbols: | ribosomal protein L28 family protein | chr4:15259773-15260847 REVERSEweakly similar to ( 124) loc\_os07g36090 12007.m079708 protein 60S ribosomal protein L24, mitochondrial precursor, putative, expressed seq=cds; coord=2:204272930..204286337:1; parent\_gene=GRMZM2G319634'



'very weakly similar to (81.3) AT3G52120 | Symbols: | SWAP (Suppressor-of-White-APricot)/surp domain-containing protein / D111/G-patch domain-containing protein | chr3:19329243-19331466 FORWARDvery weakly similar to (95.1) loc\_os09g10930 12009.m059950 protein gamma response I protein, putative, expressed seq=cds; coord=2:206621294..206623116:1; parent\_gene=GRMZM2G099105'

'moderately similar to ( 232) AT2G21470 | Symbols: SAE2, ATSAE2, EMB2764 | SAE2 (SUMO-ACTIVATING ENZYME 2); SUMO activating enzyme | chr2:9198752-9202136 FORWARDmoderately similar to ( 357) loc\_os07g39780 12007.m08220 protein ubiquitin-like 1-activating enzyme E1B, putative, expressed seq=cds; coord=2:208223142..208227514:1; parent\_gene=GRMZM2G129575'

'moderately similar to ( 232) AT2G21470 | Symbols: SAE2, ATSAE2, EMB2764 | SAE2 (SUMO-ACTIVATING ENZYME 2); SUMO activating enzyme | chr2:9198752-9202136 FORWARDmoderately similar to ( 357) loc\_os07g39780 12007.m08220 protein ubiquitin-like 1-activating enzyme E1B, putative, expressed seq=cds; coord=2:208223142..208227514:1; parent\_gene=GRMZM2G129575'

'highly similar to ( 881) AT5G26860 | Symbols: LON\_ARA\_ARA, LON1 | LON1 (LON PROTEASE 1); ATP binding / ATP-dependent peptidase/ serine-type peptidase | chr5:9451048-9456631 FORWARDnearly identical (1009) LONH2\_MAIZE Lon protease homolog 2, mitochondrial precursor (EC 3.4.21.-) - Zea mays (Maize)highly similar to ( 988) loc\_os07g48960 12007.m09105 protein lon protease homolog 2, mitochondrial precursor, putative, expressed seq=cds; coord=2:217836574..217843754:1; parent\_gene=GRMZM2G387383'

'highly similar to ( 572) AT5G50300 | Symbols: | xanthine/uracil/vitamin C permease family protein | chr5:20466492-20468084 REVERSEhighly similar to ( 792) loc\_os11g24060 12011.m06332 protein transmembrane transport protein-like, putative, expressed seq=cds; coord=2:218937924..218939954:1; parent\_gene=GRMZM2G068220'

'moderately similar to ( 326) AT3G07550 | Symbols: | F-box family protein (FBL12) | chr3:2409946-2411133 FORWARDhighly similar to ( 562) loc\_os11g16280 12011.m05713 protein F-box-like protein, putative, expressed seq=cds; coord=2:220223475..220230281:1; parent\_gene=GRMZM2G048661'

'weakly similar to ( 114) AT1G76940 | Symbols: | RNA recognition motif (RRM)-containing protein | chr1:28902707-28904085 REVERSEweakly similar to ( 139) loc\_os08g43360 12008.m080227 protein nucleic acid binding protein, putative, expressed seq=cds; coord=2:220923627..220927138:-1; parent\_gene=GRMZM2G124809'

'highly similar to ( 903) AT4G27910 | Symbols: ATX4, SDG16 | SDG16 (SET DOMAIN PROTEIN 16); protein binding / zinc ion binding | chr4:13894694-13900256 FORWARDvery weakly similar to (92.4) EZ1\_MAIZE Polycomb protein EZ1 (Enhancer of zeste protein 1) - Zea mays (Maize)nearly identical (1491) loc\_os01g11952 12001.m07811 protein histone-lysine N-methyltransferase ATX5, putative, expressed seq=cds; coord=3:3200782..3209083:1; parent\_gene=GRMZM2G085266'

'moderately similar to ( 231) AT4G18270 | Symbols: ATTRANS11, TRANS11 | ATTRANS11; P-P-bond-hydrolysis-driven protein transmembrane transporter/ catalytic | chr4:10099364-10101897 REVERSEmoderately similar to ( 384) loc\_os01g11260 12001.m07745 protein phospho-N-acetylmuramoyl-pentapeptide-transferase, putative, expressed seq=cds; coord=3:3835088..3839366:-1; parent\_gene=GRMZM2G093278'

'highly similar to ( 695) AT2G34960 | Symbols: CAT5 | CAT5 (CATIONIC AMINO ACID TRANSPORTER 5); L-glutamate transmembrane transporter/ L-lysine transmembrane transporter/ arginine transmembrane transporter/ cationic amino acid transmembrane transporter | chr2:14744175-14745884 REVERSEhighly similar to ( 887) loc\_os01g11160 12001.m07736 protein cationic amino acid transporter 4, putative, expressed seq=cds; coord=3:3923176..3925460:1; parent\_gene=GRMZM2G146161'

'moderately similar to ( 388) AT1G45616 | Symbols: AtRLP6 | AtRLP6 (Receptor Like Protein 6); protein binding | chr1:17183550-17186534 REVERSEmoderately similar to ( 207) PSKR\_DAUCA Phytosulfokine receptor precursor (EC 2.7.11.1) (Phytosulfokine LRR receptor kinase) - Daucus carota (Carrot)nearly identical (1443) loc\_os04g28210 12004.m07938 protein verticillium wilt disease resistance protein, putative, expressed seq=cds; coord=3:14685361..14688745:1; parent\_gene=GRMZM2G062576'

'highly similar to ( 564) loc\_os01g05660 12001.m150482 protein expressed protein seq=cds; coord=3:17580074..17584970:1; parent\_gene=GRMZM2G166064'

'moderately similar to ( 297) AT1G17020 | Symbols: SRG1, ATSRG1 | SRG1 (SENESCENCE-RELATED GENE 1); oxidoreductase, acting on diphenols and related substances as donors, oxygen as acceptor / oxidoreductase, acting on paired donors, with incorporation or reduction of molecular oxygen, 2-oxoglutarate as one donor, and inc | chr1:5820258-5821741 FORWARDweakly similar to ( 195) FLS\_PETHY Flavonol synthase/flavanone 3-hydroxylase (EC 1.14.11.23) (EC 1.14.11.9) (FLS) - Petunia hybrida (Petunia)moderately similar to ( 468) loc\_os10g40880 12010.m06856 protein flavonol synthase/flavanone 3-hydroxylase, putative, expressed seq=cds; coord=3:52450288..52452458:-1; parent\_gene=GRMZM2G363893'

'moderately similar to ( 207) AT1G33430 | Symbols: | galactosyltransferase family protein | chr1:12124438-12126052 REVERSEmoderately similar to ( 233) loc\_os01g65590 12001.m12668 protein beta-1,3-galactosyltransferase sqv-2, putative, expressed seq=cds; coord=3:172444363..172446418:-1; parent\_gene=GRMZM2G431006'

'weakly similar to ( 127) loc\_os01g62514 12001.m150967 protein hypothetical protein seq=cds; coord=3:180598307..180598998:1; parent\_gene=GRMZM2G178671'

'very weakly similar to (86.3) AT1G26640 | Symbols: | aspartate/glutamate/uridylylate kinase family protein | chr1:9207620-9209766 REVERSEweakly similar to ( 112) loc\_os01g55890 12001.m150726 protein archaeal kinase, putative, expressed seq=cds; coord=3:194512254..194513303:1; parent\_gene=GRMZM2G052816'

'weakly similar to ( 134) AT1G18650 | Symbols: PDCB3 | PDCB3 (PLASMODESMATA CALLOSE-BINDING PROTEIN 3); callose binding / polysaccharide binding | chr1:6419036-6420413 REVERSEvery weakly similar to (84.3) E13B\_WHEAT Glucan endo-1,3-beta-glucosidase precursor (EC 3.2.1.39) ((1->3)-beta-glucan endohydrolase) ((1->3)-beta-glucanase) (Beta-1,3-endoglucanase) - Triticum aestivum (Wheat)weakly similar to ( 181) loc\_os01g55820 12001.m11738 protein glucan endo-1,3-beta-glucosidase 1 precursor, putative, expressed seq=cds; coord=3:194739182..194740582:1; parent\_gene=GRMZM2G162768'

'weakly similar to ( 134) AT1G18650 | Symbols: PDCB3 | PDCB3 (PLASMODESMATA CALLOSE-BINDING PROTEIN 3); callose binding / polysaccharide binding | chr1:6419036-6420413 REVERSEvery weakly similar to (84.3) E13B\_WHEAT Glucan endo-1,3-beta-glucosidase precursor (EC 3.2.1.39) ((1->3)-beta-glucan endohydrolase) ((1->3)-beta-glucanase) (Beta-1,3-endoglucanase) - Triticum aestivum (Wheat)weakly similar to ( 181) loc\_os01g55820 12001.m11738 protein glucan endo-1,3-beta-glucosidase 1 precursor, putative, expressed seq=cds; coord=3:194739182..194740582:1; parent\_gene=GRMZM2G162768'

'weakly similar to ( 155) AT1G29220 | Symbols: | transcriptional regulator family protein | chr1:10210678-10212571 REVERSEmoderately similar to ( 389) loc\_os01g55490 12001.m42726 protein transcription regulator, putative, expressed seq=cds; coord=3:195416508..195423273:-1; parent\_gene=GRMZM2G015881'

'weakly similar to ( 155) AT1G29220 | Symbols: | transcriptional regulator family protein | chr1:10210678-10212571 REVERSEmoderately similar to ( 389) loc\_os01g55490 12001.m42726 protein transcription regulator, putative, expressed seq=cds; coord=3:195416508..195423273:-1; parent\_gene=GRMZM2G015881'

'weakly similar to ( 102) AT2G34140 | Symbols: | Dof-type zinc finger domain-containing protein | chr2:14414188-14414700 REVERSEvery weakly similar to (83.6) MNB1A\_MAIZE Dof zinc finger protein MNB1A - Zea mays (Maize)weakly similar to ( 106) loc\_os01g55340 12001.m11693 protein expressed protein seq=cds; coord=3:195926190..195927293:1; parent\_gene=GRMZM2G394973'

'moderately similar to ( 239) AT3G58680 | Symbols: MBF1B, ATMBF1B | MBF1B (MULTIPROTEIN BRIDGING FACTOR 1B); DNA binding / transcription coactivator | chr3:21707367-21708625 FORWARDmoderately similar to ( 268) loc\_os08g27850 12008.m080145 protein endothelial differentiation-related factor 1, putative, expressed seq=cds; coord=4:24613100..24615973:-1; parent\_gene=GRMZM2G101480'

'weakly similar to ( 140) AT1G79040 | Symbols: PSBR | PSBR (photosystem II subunit R) | chr1:29736085-29736781 FORWARDweakly similar to ( 154) PSBR\_SOLTU Photosystem II 10 kDa polypeptide, chloroplast precursor (Light-inducible tissue-specific ST-LS1 protein) - Solanum tuberosum (Potato)weakly similar to ( 174) loc\_os08g10020 12008.m26609 protein photosystem II 10 kDa polypeptide, chloroplast precursor, putative, expressed seq=cds; coord=4:27094767..27097143:-1; parent\_gene=GRMZM2G174984'

'very weakly similar to (97.4) loc\_os08g33530 12008.m07343 protein teosinte branched1 protein, putative seq=cds; coord=4:55919615..55920304:-1; parent\_gene=GRMZM2G062711'

'weakly similar to ( 131) AT1G59940 | Symbols: ARR3 | ARR3 (RESPONSE REGULATOR 3); transcription regulator/ two-component response regulator | chr1:22065894-22066895 REVERSEmoderately similar to ( 282) loc\_os02g35180 12002.m08606 protein OsRR2 - Rice type-A response regulator, expressed seq=cds; coord=4:118065448..118068066:1; parent\_gene=GRMZM2G096171'

'nearly identical (1095) AT1G30450 | Symbols: CCC1, ATCCC1, HAP5 | CCC1 (CATION-CHLORIDE CO-TRANSPORTER 1); cation:chloride symporter/ sodium:potassium:chloride symporter | chr1:10762905-10769061 FORWARDnearly identical (1221) loc\_os08g23440 12008.m06365 protein CCC1, putative, expressed seq=cds; coord=4:189189209..189199161:1; parent\_gene=GRMZM2G401874'

'moderately similar to ( 275) AT3G07040 | Symbols: RPM1, RPS3 | RPM1 (RESISTANCE TO P. SYRINGAE PV MACULICOLA 1); nucleotide binding / protein binding | chr3:2226244-2229024 REVERSEhighly similar to ( 776) loc\_os11g11960 12011.m05388 protein NBS-LRR type disease resistance protein, putative, expressed seq=cds; coord=4:189294131..189297207:-1; parent\_gene=GRMZM2G050959'

'moderately similar to ( 410) AT2G21270 | Symbols: | ubiquitin fusion degradation UFD1 family protein | chr2:9107841-9110012 FORWARDhighly similar to ( 521) loc\_os02g08480 12002.m06194 protein ubiquitin fusion degradation protein 1, putative, expressed seq=cds; coord=4:235163242..235166429:1; parent\_gene=GRMZM2G037185'

'moderately similar to ( 303) AT3G54170 | Symbols: ATFIP37, FIP37 | ATFIP37 (ARABIDOPSIS THALIANA FKBP12 INTERACTING PROTEIN 37); protein binding | chr3:20056848-20059396 FORWARDmoderately similar to ( 416) loc\_os06g27970 12006.m07342 protein FKBP12-interacting protein of 37 kDa, putative, expressed seq=cds; coord=4:239482617..239492011:1; parent\_gene=GRMZM2G169871'

'highly similar to ( 739) AT1G20630 | Symbols: CAT1 | CAT1 (CATALASE 1); catalase | chr1:7146812-7149609 FORWARDhighly similar to ( 962) CATA3\_MAIZE Catalase isozyme 3 (EC 1.11.1.6) - Zea mays (Maize)highly similar to ( 857) loc\_os02g02400 12002.m77750 protein catalase isozyme A, putative, expressed seq=cds; coord=4:240105137..240108983:1; parent\_gene=GRMZM2G079348'

'highly similar to ( 739) AT1G20630 | Symbols: CAT1 | CAT1 (CATALASE 1); catalase | chr1:7146812-7149609 FORWARDhighly similar to ( 962) CATA3\_MAIZE Catalase isozyme 3 (EC 1.11.1.6) - Zea mays (Maize)highly similar to ( 857) loc\_os02g02400 12002.m77750 protein catalase isozyme A, putative, expressed seq=cds; coord=4:240105137..240108983:1; parent\_gene=GRMZM2G079348'

'moderately similar to ( 438) AT1G75500 | Symbols: | nodulin MtN21 family protein | chr1:28338282-28340091 REVERSEmoderately similar to ( 477) loc\_os02g02310 12002.m05580 protein nodulin-like protein 5NG4, putative, expressed seq=cds; coord=4:240225659..240227771:1; parent\_gene=GRMZM2G010372'

'weakly similar to ( 145) AT1G76890 | Symbols: GT2, AT-GT2 | GT2; transcription factor | chr1:28873211-28875203 REVERSEmoderately similar to ( 307) loc\_os02g01380 12002.m77761 protein expressed protein seq=cds; coord=4:240522539..240525539:1; parent\_gene=GRMZM2G037128'

'moderately similar to ( 371) AT1G77280 | Symbols: | protein kinase family protein | chr1:29031468-29035882 REVERSEweakly similar to ( 172) PSKR\_DAUCA Phytosulfokine receptor precursor (EC 2.7.11.1) (Phytosulfokine LRR receptor kinase) - Daucus carota (Carrot)nearly identical (1138) loc\_os03g62340 12003.m11110 protein ATP binding protein, putative, expressed seq=cds; coord=5:1533338..1538690:1; parent\_gene=GRMZM2G148962'

'moderately similar to ( 371) AT1G77280 | Symbols: | protein kinase family protein | chr1:29031468-29035882 REVERSEweakly similar to ( 172) PSKR\_DAUCA Phytosulfokine receptor precursor (EC 2.7.11.1) (Phytosulfokine LRR receptor kinase) - Daucus carota (Carrot)nearly identical (1138) loc\_os03g62340 12003.m11110 protein ATP binding protein, putative, expressed seq=cds; coord=5:1533338..1538690:1; parent\_gene=GRMZM2G148962'

'very weakly similar to (84.7) AT5G06470 | Symbols: | glutaredoxin family protein | chr5:1974659-1975378  
REVERSEweakly similar to ( 129) loc\_os07g06600 12007.m05120 protein electron transporter/ thiol-disulfide  
exchange intermediate, putative, expressed seq=cds; coord=5:1756402..1757081:-1; parent\_gene=GRMZM2G053378'

'moderately similar to ( 394) AT5G26680 | Symbols: | endonuclease, putative | chr5:9311882-9315458  
REVERSEmoderately similar to ( 474) FEN1B\_ORYSA Flap endonuclease 1b (EC 3.1.-.) (OsFEN-1b) - Oryza sativa  
(Rice)moderately similar to ( 474) loc\_os03g61820 12003.m11063 protein flap endonuclease 1b, putative, expressed  
seq=cds; coord=5:1879148..1895175:1; parent\_gene=GRMZM2G398668'

'weakly similar to ( 166) loc\_os05g15890 12005.m27751 protein ATP binding protein, putative, expressed seq=cds;  
coord=5:21044389..21046589:1; parent\_gene=GRMZM2G146041'

'moderately similar to ( 228) AT4G22130 | Symbols: SRF8 | SRF8 (STRUBBELIG-RECEPTOR FAMILY 8); ATP  
binding / kinase/ protein binding / protein kinase | chr4:11724781-11727331 FORWARDweakly similar to ( 118)  
PSKR\_DAUCA Phytosulfokine receptor precursor (EC 2.7.11.1) (Phytosulfokine LRR receptor kinase) - Daucus  
carota (Carrot)moderately similar to ( 384) loc\_os02g04430 12002.m05792 protein protein kinase, putative, expressed  
seq=cds; coord=5:76726269..76729394:1; parent\_gene=GRMZM2G398559'

'weakly similar to ( 115) AT1G21150 | Symbols: | mitochondrial transcription termination factor family protein /  
mTERF family protein | chr1:7406406-7407578 REVERSEmoderately similar to ( 333) loc\_os06g12060  
12006.m05923 protein mTERF family protein, expressed seq=cds; coord=5:97174141..97175862:1;  
parent\_gene=GRMZM2G119921'

'weakly similar to ( 131) AT1G79990 | Symbols: | protein binding / structural molecule | chr1:30085910-30091949  
FORWARDweakly similar to ( 136) loc\_os11g10710 12011.m05264 protein protein kinase domain containing  
protein, expressed seq=cds; coord=5:146430831..146434116:-1; parent\_gene=GRMZM2G372812'

'weakly similar to ( 177) AT5G06130 | Symbols: | chaperone protein dnaJ-related | chr5:1853754-1855763  
REVERSEmoderately similar to ( 229) loc\_os02g33149 12002.m100716 protein expressed protein seq=cds;  
coord=5:169576839..169579921:-1; parent\_gene=GRMZM2G039089'

'moderately similar to ( 353) AT1G21710 | Symbols: OGG1, ATOGG1 | OGG1 (8-OXOGUANINE-DNA  
GLYCOSYLASE 1); oxidized purine base lesion DNA N-glycosylase | chr1:7624439-7625869 FORWARDhighly  
similar to ( 554) loc\_os02g34750 12002.m100230 protein receptor-like protein kinase 5 precursor, putative, expressed  
seq=cds; coord=5:172291156..172294857:-1; parent\_gene=GRMZM2G139031'

'moderately similar to ( 224) AT5G60580 | Symbols: | zinc finger (C3HC4-type RING finger) family protein |  
chr5:24354298-24356706 FORWARDmoderately similar to ( 334) loc\_os06g23274 12006.m06979 protein zinc  
finger, C3HC4 type family protein, expressed seq=cds; coord=5:174988527..174990580:1;  
parent\_gene=GRMZM2G331253'

'moderately similar to ( 417) AT5G64330 | Symbols: NPH3, RPT3, JK218 | NPH3 (NON-PHOTOTROPIC  
HYPOCOTYL 3); protein binding / signal transducer | chr5:25727568-25729510 FORWARDhighly similar to ( 922)  
NPH3\_ORYSA Coleoptile phototropism protein 1 (Non-phototropic hypocotyl 3-like protein) (NPH3-like protein) -  
Oryza sativa (Rice)highly similar to ( 922) loc\_os02g35970 12002.m08685 protein transposon protein, putative,  
Mutator sub-class, expressed seq=cds; coord=5:175597610..175602037:-1; parent\_gene=GRMZM2G105400'

'very weakly similar to (80.9) HMGL\_VICFA HMG1/2-like protein - Vicia faba (Broad bean) weakly similar to (133) loc\_os02g44930 12002.m09533 protein HMG1/2-like protein, putative, expressed seq=cds; coord=5:194043178..194045076:1; parent\_gene=GRMZM2G013821'

'moderately similar to (488) AT1G63000 | Symbols: NRS/ER, UER1 | NRS/ER (NUCLEOTIDE-RHAMNOSE SYNTHASE/EPIMERASE-REDUCTASE); UDP-4-keto-6-deoxy-glucose-3,5-epimerase/ UDP-4-keto-rhamnose-4-keto-reductase/ dTDP-4-dehydrorhamnose 3,5-epimerase/ dTDP-4-dehydrorhamnose reductase | chr1:23342510-23343859 FORWARD highly similar to (532) loc\_os02g45540 12002.m09591 protein dTDP-4-dehydrorhamnose reductase, putative, expressed seq=cds; coord=5:196103861..196107190:1; parent\_gene=GRMZM2G072911'

'moderately similar to (308) AT5G37680 | Symbols: ATARLA1A | ATARLA1A (ADP-ribosylation factor-like A1A); GTP binding | chr5:14969797-14971098 REVERSE weakly similar to (105) ARF1\_SOLTU ADP-ribosylation factor 1 - Solanum tuberosum (Potato) moderately similar to (317) loc\_os02g49980 12002.m100351 protein ADP-ribosylation factor-like protein 8A, putative, expressed seq=cds; coord=5:204908277..204911697:-1; parent\_gene=GRMZM2G089454'

'highly similar to (606) AT2G32990 | Symbols: AtGH9B8 | AtGH9B8 (Arabidopsis thaliana glycosyl hydrolase 9B8); catalytic/ hydrolase, hydrolyzing O-glycosyl compounds | chr2:14003361-14005844 FORWARD highly similar to (809) GUN7\_ORYSA Endoglucanase 7 precursor (EC 3.2.1.4) (Endo-1,4-beta glucanase 7) (OsGLU10) - Oryza sativa (Rice) highly similar to (809) loc\_os02g50490 12002.m10083 protein endoglucanase 1 precursor, putative, expressed seq=cds; coord=5:205562436..205565933:1; parent\_gene=GRMZM2G151257'

'highly similar to (838) AT1G68930 | Symbols: | pentatricopeptide (PPR) repeat-containing protein | chr1:25918314-25920545 FORWARD weakly similar to (103) RF1\_ORYSA Rf1 protein, mitochondrial precursor (PPR protein) (Fertility restorer) (Restorer for CMS) - Oryza sativa (Rice) nearly identical (1197) loc\_os02g01610 12002.m33989 protein tetratricopeptide-like helical, putative, expressed seq=cds; coord=5:206572964..206575640:-1; parent\_gene=GRMZM2G053396'

'weakly similar to (171) AT1G78260 | Symbols: | RNA recognition motif (RRM)-containing protein | chr1:29447317-29449246 FORWARD moderately similar to (299) loc\_os02g51890 12002.m10220 protein RNA-binding region-containing protein 1, putative, expressed seq=cds; coord=5:208556677..208562996:1; parent\_gene=GRMZM2G303915'

'weakly similar to (151) AT5G02560 | Symbols: HTA12 | HTA12; DNA binding | chr5:575437-576456 FORWARD weakly similar to (159) H2A6\_ORYSA Probable histone H2A.6 - Oryza sativa (Rice) weakly similar to (159) loc\_os05g02300 12005.m04766 protein histone H2A, putative, expressed seq=cds; coord=6:35731319..35732475:-1; parent\_gene=GRMZM2G448458'

'moderately similar to (248) AT1G70670 | Symbols: | caleosin-related family protein | chr1:26644830-26645970 FORWARD moderately similar to (315) loc\_os06g14370 12006.m32034 protein ABA-induced protein, putative, expressed seq=cds; coord=6:118130928..118144112:1; parent\_gene=GRMZM2G164308'

'highly similar to (526) AT5G55830 | Symbols: | lectin protein kinase, putative | chr5:22594655-22596700 FORWARD weakly similar to (189) PSKR\_DAUCA Phytosulfokine receptor precursor (EC 2.7.11.1) (Phytosulfokine LRR receptor kinase) - Daucus carota (Carrot) highly similar to (858) loc\_os06g17490 12006.m06461 protein protein kinase, putative, expressed seq=cds; coord=6:119395032..119397840:1; parent\_gene=GRMZM2G159953'

'moderately similar to ( 241) AT3G57260 | Symbols: BGL2, PR2, BG2, PR-2 | BGL2 (BETA-1,3-GLUCANASE 2); cellulase/ glucan 1,3-beta-glucosidase/ hydrolase, hydrolyzing O-glycosyl compounds | chr3:21188709-21189822 REVERSEmoderately similar to ( 369) E13F\_HORVU Putative glucan endo-1,3-beta-glucosidase GVI precursor (EC 3.2.1.39) ((1->3)-beta-glucan endohydrolase GVI) ((1->3)-beta-glucanase isoenzyme GVI) (Beta-1,3-endoglucanase GVI) (Fragment) - Hordeum vulgare (Barley)moderately similar to ( 434) loc\_os05g41610 12005.m08335 protein glucan endo-1,3-beta-glucosidase GVI precursor, putative, expressed seq=cds; coord=6:156249134..156253222:1; parent\_gene=GRMZM2G088951'

'moderately similar to ( 235) AT4G36520 | Symbols: | heat shock protein binding | chr4:17230589-17235435 REVERSEhighly similar to ( 692) loc\_os05g50370 12005.m09106 protein AUL1, putative, expressed seq=cds; coord=6:166249166..166256866:1; parent\_gene=GRMZM2G438895'

'moderately similar to ( 419) AT1G15000 | Symbols: scp150 | scp150 (serine carboxypeptidase-like 50); serine-type carboxypeptidase | chr1:5168613-5169947 FORWARDweakly similar to ( 199) CBPX\_ORYSA Serine carboxypeptidase-like precursor (EC 3.4.16.-) - Oryza sativa (Rice)highly similar to ( 621) loc\_os05g50600 12005.m09129 protein serine carboxypeptidase CPVL precursor, putative, expressed seq=cds; coord=6:166885737..166887580:1; parent\_gene=GRMZM2G159016'

'nearly identical (1679) AT5G05170 | Symbols: CESA3, IXR1, ATCESA3, ATH-B, CEV1 | CEV1 (CONSTITUTIVE EXPRESSION OF VSP 1); cellulose synthase/ transferase, transferring glycosyl groups | chr5:1530401-1535090 REVERSEnearly identical (2085) loc\_os07g10770 12007.m05532 protein CESA8 - cellulose synthase, expressed seq=cds; coord=7:18609337..18615348:-1; parent\_gene=GRMZM2G424832'

'moderately similar to ( 394) AT2G47990 | Symbols: SWA1, EDA13, EDA19 | SWA1 (SLOW WALKER1); nucleotide binding | chr2:19637010-19638602 REVERSEhighly similar to ( 726) loc\_os07g12320 12007.m05685 protein small nucleolar ribonucleoprotein complex subunit, putative, expressed seq=cds; coord=7:20619448..20621061:1; parent\_gene=AC212570.3\_FG006'

'moderately similar to ( 394) AT2G47990 | Symbols: SWA1, EDA13, EDA19 | SWA1 (SLOW WALKER1); nucleotide binding | chr2:19637010-19638602 REVERSEhighly similar to ( 726) loc\_os07g12320 12007.m05685 protein small nucleolar ribonucleoprotein complex subunit, putative, expressed seq=cds; coord=7:20619448..20621061:1; parent\_gene=AC212570.3\_FG006'

'moderately similar to ( 207) AT4G19680 | Symbols: IRT2 | IRT2; iron ion transmembrane transporter/ zinc ion transmembrane transporter | chr4:10703385-10704621 FORWARDmoderately similar to ( 393) loc\_os07g12890 12007.m28960 protein ZIP zinc/iron transport family protein, expressed seq=cds; coord=7:21798962..21800971:-1; parent\_gene=GRMZM2G093276'

'highly similar to ( 640) AT1G27680 | Symbols: APL2 | APL2 (ADPGLC-PPASE LARGE SUBUNIT); glucose-1-phosphate adenyltransferase | chr1:9631630-9634450 FORWARDhighly similar to ( 617) GLGL1\_BETVU Glucose-1-phosphate adenyltransferase large subunit, chloroplast precursor (EC 2.7.7.27) (ADP-glucose synthase) (ADP-glucose pyrophosphorylase) (AGPase S) (Alpha-D-glucose-1-phosphate adenyl transferase) - Beta vulgaris (Sugar beet)highly similar to ( 791) loc\_os07g13980 12007.m05843 protein glucose-1-phosphate adenyltransferase large subunit, chloroplast precursor, putative, expressed seq=cds; coord=7:23756173..23767134:-1; parent\_gene=GRMZM2G144002'

'moderately similar to ( 386) AT2G44060 | Symbols: | late embryogenesis abundant family protein / LEA family protein | chr2:18226922-18227988 FORWARDvery weakly similar to (92.8) LEA14\_SOYBN Desiccation protectant protein Lea14 homolog - Glycine max (Soybean)moderately similar to ( 441) loc\_os03g62620 12003.m101565 protein salt tolerance protein, putative, expressed seq=cds; coord=7:27804756..27806317:1; parent\_gene=GRMZM2G053637'  
'highly similar to ( 503) AT4G12570 | Symbols: UPL5 | UPL5 (UBIQUITIN PROTEIN LIGASE 5); acid-amino acid ligase/ binding / ubiquitin-protein ligase | chr4:7445585-7448819 FORWARDhighly similar to ( 915) loc\_os09g31090 12009.m22004 protein HECT-domain, putative, expressed seq=cds; coord=7:132186216..132203350:-1; parent\_gene=GRMZM2G181378'

'moderately similar to ( 266) AT4G21440 | Symbols: ATMYB102, ATM4 | ATMYB102 (ARABIDOPSIS MYB-LIKE 102); DNA binding / transcription factor | chr4:11418425-11419652 REVERSEmoderately similar to ( 215) MYB38\_MAIZE Myb-related protein Zm38 - Zea mays (Maize)moderately similar to ( 355) loc\_os07g37210 12007.m07971 protein MYB transcription factor, putative, expressed seq=cds; coord=7:157167150..157168689:-1; parent\_gene=GRMZM2G031323'

'weakly similar to ( 154) AT4G21540 | Symbols: SPHK1 | SPHK1 (SPHINGOSINE KINASE 1); D-erythro-sphingosine kinase/ diacylglycerol kinase/ sphinganine kinase | chr4:11460703-11462356 FORWARDmoderately similar to ( 249) loc\_os07g37580 12007.m29228 protein D-erythro-sphingosine kinase/ diacylglycerol kinase, putative, expressed seq=cds; coord=7:157593622..157598024:1; parent\_gene=GRMZM2G057475'

'very weakly similar to (87.4) AT1G61215 | Symbols: BRD4 | BRD4 (BROMODOMAIN 4); DNA binding | chr1:22573173-22575374 FORWARDmoderately similar to ( 262) loc\_os07g37800 12007.m29230 protein DNA binding protein, putative, expressed seq=cds; coord=7:158037365..158041856:-1; parent\_gene=GRMZM2G434301'

'moderately similar to ( 253) AT2G30360 | Symbols: CIPK11, PKS5, SIP4, SNRK3.22 | SIP4 (SOS3-INTERACTING PROTEIN 4); kinase/ protein kinase | chr2:12937265-12938572 REVERSEweakly similar to ( 193) CIPK1\_ORYSA CIPK-like protein 1 (EC 2.7.11.1) (OsCK1) - Oryza sativa (Rice)moderately similar to ( 407) loc\_os07g48090 12007.m09024 protein CBL-interacting serine/threonine-protein kinase 11, putative, expressed seq=cds; coord=7:172879486..172881907:1; parent\_gene=GRMZM2G177050'

'moderately similar to ( 311) AT3G20770 | Symbols: EIN3 | EIN3 (ETHYLENE-INSENSITIVE3); transcription factor chr3:7260702-7262588 REVERSEmoderately similar to ( 433) loc\_os07g48630 12007.m29024 protein ETHYLENE-INSENSITIVE3-like 1 protein, putative, expressed seq=cds; coord=7:173951359..173953387:-1; parent\_gene=GRMZM2G151811'

'moderately similar to ( 447) AT3G14067 | Symbols: | subtilase family protein | chr3:4658421-4660754 REVERSEhighly similar to ( 798) loc\_os07g48650 12007.m09076 protein xylem serine proteinase 1 precursor, putative, expressed seq=cds; coord=7:174029436..174031718:1; parent\_gene=GRMZM2G059165'

'weakly similar to ( 108) AT2G34140 | Symbols: | Dof-type zinc finger domain-containing protein | chr2:14414188-14414700 REVERSEvery weakly similar to ( 100) MNB1A\_MAIZE Dof zinc finger protein MNB1A - Zea mays (Maize)weakly similar to ( 120) loc\_os01g55340 12001.m11693 protein expressed protein seq=cds; coord=8:123061033..123061653:-1; parent\_gene=AC209819.3\_FG009'



'weakly similar to ( 167) AT3G02550 | Symbols: LBD41 | LBD41 (LOB DOMAIN-CONTAINING PROTEIN 41) | chr3:536747-537650 REVERSEmoderately similar to ( 201) loc\_os01g32770 12001.m09596 protein seed specific protein Bn15D17A, putative, expressed seq=cds; coord=8:123322670..123323521:-1; parent\_gene=AC234149.1\_FG002'

'highly similar to ( 538) AT2G42960 | Symbols: | protein kinase family protein | chr2:17868597-17870630 REVERSEmoderately similar to ( 211) PSKR\_DAUCA Phytosulfokine receptor precursor (EC 2.7.11.1) (Phytosulfokine LRR receptor kinase) - Daucus carota (Carrot)highly similar to ( 823) loc\_os01g44110 12001.m10669 protein BRASSINOSTEROID INSENSITIVE 1-associated receptor kinase 1 precursor, putative, expressed seq=cds; coord=8:146029595..146033938:1; parent\_gene=GRMZM2G017386'

'weakly similar to ( 133) AT1G10640 | Symbols: | polygalacturonase | chr1:3515478-3517807 REVERSEmoderately similar to ( 229) loc\_os01g44970 12001.m10703 protein polygalacturonase precursor, putative, expressed seq=cds; coord=8:146183315..146186058:1; parent\_gene=GRMZM2G179696'

'highly similar to ( 746) AT1G80300 | Symbols: NTT1, ATNTT1 | NTT1 (NUCLEOTIDE TRANSPORTER 1); ATP:ADP antiporter | chr1:30191954-30194280 FORWARDhighly similar to ( 754) TLC1\_SOLTU Plastidic ATP/ADP-transporter - Solanum tuberosum (Potato)highly similar to ( 919) loc\_os01g45910 12001.m10791 protein plastidic ATP/ADP-transporter, putative, expressed seq=cds; coord=8:146989849..146994732:1; parent\_gene=GRMZM2G050003'

'very weakly similar to (91.7) AT1G65780 | Symbols: | tRNA-splicing endonuclease positive effector-related | chr1:24462958-24466888 REVERSEweakly similar to ( 110) loc\_os04g49270 12004.m09862 protein expressed protein seq=cds; coord=8:150897458..150899203:1; parent\_gene=GRMZM2G052296'

'moderately similar to ( 203) AT3G56570 | Symbols: | SET domain-containing protein | chr3:20958660-20961137 FORWARDmoderately similar to ( 308) loc\_os01g65730 12001.m12682 protein SET domain containing protein, expressed seq=cds; coord=8:165266558..165269212:1; parent\_gene=GRMZM2G092759'

'moderately similar to ( 266) AT4G38620 | Symbols: ATMYB4, MYB4 | MYB4; DNA binding / transcription factor | chr4:18053866-18054876 FORWARDmoderately similar to ( 273) MYB38\_MAIZE Myb-related protein Zm38 - Zea mays (Maize)moderately similar to ( 325) loc\_os01g65370 12001.m12650 protein transcription repressor MYB4, putative seq=cds; coord=8:165875616..165876842:-1; parent\_gene=GRMZM2G405094'

'moderately similar to ( 266) AT4G38620 | Symbols: ATMYB4, MYB4 | MYB4; DNA binding / transcription factor | chr4:18053866-18054876 FORWARDmoderately similar to ( 273) MYB38\_MAIZE Myb-related protein Zm38 - Zea mays (Maize)moderately similar to ( 325) loc\_os01g65370 12001.m12650 protein transcription repressor MYB4, putative seq=cds; coord=8:165875616..165876842:-1; parent\_gene=GRMZM2G405094'

'highly similar to ( 559) AT2G41790 | Symbols: | peptidase M16 family protein / insulinase family protein | chr2:17429453-17436110 REVERSEhighly similar to ( 738) loc\_os01g57073 12001.m11864 protein insulin-degrading enzyme, putative, expressed seq=cds; coord=8:172180747..172198680:-1; parent\_gene=GRMZM2G133249'

'highly similar to ( 600) AT1G75450 | Symbols: CKX5, ATCKX5, ATCKX6 | CKX5 (CYTOKININ OXIDASE 5); cytokinin dehydrogenase | chr1:28315248-28318064 REVERSEmoderately similar to ( 418) CKX1\_MAIZE Cytokinin dehydrogenase 1 precursor (EC 1.5.99.12) (Cytokinin oxidase 1) (CKO 1) (COX 1) (ZmCKX1) - Zea mays (Maize)highly similar to ( 822) loc\_os01g56810 12001.m11838 protein cytokinin dehydrogenase 5 precursor, putative, expressed seq=cds; coord=8:172364590..172368643:1; parent\_gene=GRMZM2G024476'

'moderately similar to ( 283) AT4G17650 | Symbols: | aromatic-rich family protein | chr4:9827749-9829443 FORWARDmoderately similar to ( 368) loc\_os01g56560 12001.m11813 protein protein COQ10 A, mitochondrial precursor, putative, expressed seq=cds; coord=8:172486699..172489943:1; parent\_gene=GRMZM2G111472'

'moderately similar to ( 240) AT5G39990 | Symbols: | glycosyltransferase family 14 protein / core-2/I-branching enzyme family protein | chr5:16004494-16006428 FORWARDmoderately similar to ( 445) loc\_os01g56570 12001.m11814 protein xylosyltransferase 2, putative, expressed seq=cds; coord=8:172491525..172493375:1; parent\_gene=GRMZM2G111428'

'moderately similar to ( 290) AT3G21350 | Symbols: | RNA polymerase transcriptional regulation mediator-related | chr3:7517106-7518587 FORWARDmoderately similar to ( 407) loc\_os06g11370 12006.m05854 protein RNA polymerase transcriptional regulation mediator, subunit 6, putative, expressed seq=cds; coord=9:7177254..7182212:-1; parent\_gene=GRMZM2G017537'

'moderately similar to ( 483) AT1G76680 | Symbols: OPR1, ATOPR1 | OPR1; 12-oxophytodienoate reductase | chr1:28776982-28778271 FORWARDhighly similar to ( 601) loc\_os06g11290 12006.m05846 protein 12-oxophytodienoate reductase 2, putative, expressed seq=cds; coord=9:7308153..7309906:1; parent\_gene=GRMZM2G000236'

'moderately similar to ( 483) AT1G76680 | Symbols: OPR1, ATOPR1 | OPR1; 12-oxophytodienoate reductase | chr1:28776982-28778271 FORWARDhighly similar to ( 601) loc\_os06g11290 12006.m05846 protein 12-oxophytodienoate reductase 2, putative, expressed seq=cds; coord=9:7308153..7309906:1; parent\_gene=GRMZM2G000236'

'moderately similar to ( 454) AT1G73360 | Symbols: HDG11, EDT1, ATHDG11 | HDG11 (HOMEODOMAIN GLABROUS 11); DNA binding / transcription factor | chr1:27578893-27581820 REVERSEhighly similar to ( 659) loc\_os06g10600 12006.m05778 protein DNA binding protein, putative, expressed seq=cds; coord=9:8971612..8975297:1; parent\_gene=GRMZM2G062318'

'moderately similar to ( 408) AT3G62830 | Symbols: UXS2, ATUXS2 | AUD1; UDP-glucuronate decarboxylase/ catalytic/ dTDP-glucose 4,6-dehydratase | chr3:23232539-23235353 FORWARDmoderately similar to ( 465) loc\_os03g17230 12003.m07153 protein UDP-glucuronic acid decarboxylase 1, putative, expressed seq=cds; coord=9:138880653..138883538:1; parent\_gene=GRMZM2G347717'

'moderately similar to ( 408) AT3G62830 | Symbols: UXS2, ATUXS2 | AUD1; UDP-glucuronate decarboxylase/ catalytic/ dTDP-glucose 4,6-dehydratase | chr3:23232539-23235353 FORWARDmoderately similar to ( 465) loc\_os03g17230 12003.m07153 protein UDP-glucuronic acid decarboxylase 1, putative, expressed seq=cds; coord=9:138880653..138883538:1; parent\_gene=GRMZM2G347717'

'moderately similar to ( 330) AT1G64900 | Symbols: CYP89A2, CYP89 | CYP89A2 (CYTOCHROME P450 89A2); electron carrier/ heme binding / iron ion binding / monooxygenase/ oxygen binding | chr1:24113283-24114803 FORWARDmoderately similar to ( 258) C77A3\_SOYBN Cytochrome P450 77A3 (EC 1.14.-.-) - Glycine max (Soybean)moderately similar to ( 460) loc\_os10g05020 12010.m03909 protein transposon protein, putative, unclassified, expressed seq=cds; coord=10:893976..895713:-1; parent\_gene=GRMZM2G135536'

'nearly identical (1081) AT3G59420 | Symbols: ACR4 | ACR4 (ARABIDOPSIS CRINKLY4); kinase/ transmembrane receptor protein kinase | chr3:21959871-21962558 REVERSEnearly identical (1823) CRI4\_MAIZE Putative receptor protein kinase CRINKLY4 precursor (EC 2.7.11.1) - Zea mays (Maize)nearly identical (1608) loc\_os03g43670 12003.m09410 protein receptor protein kinase CRINKLY4 precursor, putative, expressed seq=cds; coord=10:5587952..5591862:1; parent\_gene=GRMZM2G051637'

'weakly similar to ( 102) loc\_os08g40620 12008.m26746 protein microtubule-associated protein, putative, expressed seq=cds; coord=10:19538082..19540456:1; parent\_gene=GRMZM2G006206'

'weakly similar to ( 175) AT3G03860 | Symbols: ATAPRL5 | ATAPRL5 (APR-like 5) | chr3:992465-994315 FORWARDmoderately similar to ( 325) loc\_os12g35640 12012.m07357 protein OsAPRL6 - Oryza sativa adenosine 5'-phosphosulfate reductase-like, expressed seq=cds; coord=10:24443942..24448936:-1; parent\_gene=GRMZM2G141848'

'highly similar to ( 563) AT3G06350 | Symbols: EMB3004, MEE32 | MEE32 (MATERNAL EFFECT EMBRYO ARREST 32); 3-dehydroquinate dehydratase/ NADP or NADPH binding / binding / catalytic/ shikimate 5-dehydrogenase | chr3:1924536-1927701 REVERSEhighly similar to ( 792) loc\_os12g34874 12012.m73984 protein shikimate dehydrogenase, putative, expressed seq=cds; coord=10:25975417..25980229:-1; parent\_gene=GRMZM2G014376'

'weakly similar to ( 125) AT2G46870 | Symbols: NGA1 | NGA1 (NGATHA1); transcription factor | chr2:19261313-19262245 FORWARDweakly similar to ( 119) loc\_os04g49230 12004.m09858 protein RAV transcription factor, putative, expressed seq=cds; coord=10:67362570..67363460:1; parent\_gene=GRMZM2G423393'

'moderately similar to ( 253) AT3G24440 | Symbols: VRN5, VIL1 | VRN5 (VERNALIZATION 5) | chr3:8876207-8878171 REVERSEhighly similar to ( 569) loc\_os05g05310 12005.m27699 protein fibronectin type III domain containing protein, expressed seq=cds; coord=10:89495479..89498597:-1; parent\_gene=GRMZM2G339820'

'highly similar to ( 620) AT2G24240 | Symbols: | potassium channel tetramerisation domain-containing protein | chr2:10310838-10312163 FORWARDhighly similar to ( 833) loc\_os04g42310 12004.m09202 protein K

'weakly similar to ( 103) AT1G61820 | Symbols: BGLU46 | BGLU46 (BETA GLUCOSIDASE 46); catalytic/ cation binding / hydrolase, hydrolyzing O-glycosyl compounds | chr1:22836707-22838444 FORWARDweakly similar to ( 152) loc\_os04g43410 12004.m09304 protein beta-glucosidase homolog precursor, putative, expressed seq=cds; coord=10:130299046..130299754:-1; parent\_gene=GRMZM2G031628'

'moderately similar to ( 313) AT4G30270 | Symbols: MER15B, MERI-5, SEN4 | MER15B (meristem-5); hydrolase, acting on glycosyl bonds / xyloglucan:xyloglucosyl transferase | chr4:14819445-14820448 REVERSEmoderately similar to ( 300) BRU1\_SOYBN Brassinosteroid-regulated protein BRU1 precursor - Glycine max (Soybean)moderately similar to ( 436) loc\_os04g51460 12004.m10042 protein xyloglucan endotransglucosylase/hydrolase protein 15 precursor, putative, expressed seq=cds; coord=10:141234026..141235309:1; parent\_gene=GRMZM2G142857'

'weakly similar to ( 114) loc\_os04g52530 12004.m10146 protein metal ion binding protein, putative, expressed seq=cds; coord=10:142368728..142370473:1; parent\_gene=GRMZM2G354855'

'weakly similar to ( 114) loc\_os04g52530 12004.m10146 protein metal ion binding protein, putative, expressed seq=cds; coord=10:142368728..142370473:1; parent\_gene=GRMZM2G354855'

'weakly similar to ( 136) AT5G65420 | Symbols: CYCD4;1 | CYCD4;1 (CYCLIN D4;1); cyclin-dependent protein kinase regulator | chr5:26141592-26143750 REVERSEweakly similar to ( 197) loc\_os09g29100 12009.m06061 protein cyclin delta-2, putative, expressed seq=cds; coord=10:145376015..145380746:1; parent\_gene=GRMZM2G546369'

'weakly similar to ( 147) AT1G02065 | Symbols: SPL8 | SPL8 (SQUAMOSA PROMOTER BINDING PROTEIN-LIKE 8); DNA binding | chr1:365625-367149 FORWARDhighly similar to ( 503) LG1\_MAIZE LIGULELESS1 protein - Zea mays (Maize)moderately similar to ( 463) loc\_os04g56170 12004.m10508 protein LIGULELESS1 protein, putative, expressed seq=cds; coord=10:146291533..146295099:-1; parent\_gene=GRMZM2G058588'

'weakly similar to ( 152) AT3G59650 | Symbols: | mitochondrial ribosomal protein L51/S25/CI-B8 family protein | chr3:22033216-22033928 FORWARDweakly similar to ( 182) loc\_os03g10930 12003.m06545 protein mitochondrial ribosomal protein L43, putative, expressed seq=cds; coord=1:21456899..21461749:1; parent\_gene=GRMZM2G004259'

'very weakly similar to (96.3) AT1G49850 | Symbols: | zinc finger (C3HC4-type RING finger) family protein | chr1:18455326-18456444 REVERSEmoderately similar to ( 368) loc\_os03g10890 12003.m06541 protein RING-H2 finger protein, putative, expressed seq=cds; coord=1:21469310..21471441:-1; parent\_gene=GRMZM2G004422'

'seq=cds; coord=1:21603261..21604413:-1; parent\_gene=AC200038.4\_FG011'

'moderately similar to ( 229) AT4G37580 | Symbols: HLS1, COP3, UNS2 | HLS1 (HOOKLESS 1); N-acetyltransferase | chr4:17658932-17660564 FORWARDmoderately similar to ( 366) loc\_os03g10810 12003.m35083 protein HLS1, putative, expressed seq=cds; coord=1:21720856..21722289:1; parent\_gene=GRMZM2G114184'

'moderately similar to ( 229) AT4G37580 | Symbols: HLS1, COP3, UNS2 | HLS1 (HOOKLESS 1); N-acetyltransferase | chr4:17658932-17660564 FORWARDmoderately similar to ( 366) loc\_os03g10810 12003.m35083 protein HLS1, putative, expressed seq=cds; coord=1:21720856..21722289:1; parent\_gene=GRMZM2G114184'

'highly similar to ( 581) AT2G40490 | Symbols: HEME2 | HEME2; uroporphyrinogen decarboxylase | chr2:16912961-16914988 FORWARDhighly similar to ( 677) DCUP\_MAIZE Uroporphyrinogen decarboxylase, chloroplast precursor (EC 4.1.1.37) (URO-D) (UPD) - Zea mays (Maize)highly similar to ( 696) loc\_os03g21900 12003.m07594 protein uroporphyrinogen decarboxylase, putative, expressed seq=cds; coord=1:56558221..56561693:1; parent\_gene=GRMZM2G044074'

'moderately similar to ( 446) AT2G05940 | Symbols: | protein kinase, putative | chr2:2287514-2289270 REVERSEmoderately similar to ( 215) NORK\_MEDTR Nodulation receptor kinase precursor (EC 2.7.11.1) (Does not make infections protein 2) (Symbiosis receptor-like kinase) (MtSYM RK) - Medicago truncatula (Barrel medic)highly similar to ( 603) loc\_os03g29410 12003.m08215 protein protein kinase APK1B, chloroplast precursor, putative, expressed seq=cds; coord=1:70768373..70772393:-1; parent\_gene=GRMZM2G142390'

'moderately similar to ( 432) AT3G22750 | Symbols: | protein kinase, putative | chr3:8037364-8039096 REVERSEvery weakly similar to (99.4) NORK\_MEDTR Nodulation receptor kinase precursor (EC 2.7.11.1) (Does not make infections protein 2) (Symbiosis receptor-like kinase) (MtSYM RK) - Medicago truncatula (Barrel medic)highly similar to ( 603) loc\_os03g53410 12003.m10311 protein ATMRK1, putative, expressed seq=cds; coord=1:275646520..275650740:1; parent\_gene=GRMZM2G131629'

'highly similar to ( 934) AT2G02220 | Symbols: ATPSKR1, PSKR1 | PSKR1 (PHYTOSULFOKIN RECEPTOR 1); ATP binding / peptide receptor/ protein serine/threonine kinase | chr2:584098-587124 REVERSEhighly similar to ( 910) PSKR\_DAUCA Phytosulfokine receptor precursor (EC 2.7.11.1) (Phytosulfokine LRR receptor kinase) - Daucus carota (Carrot)nearly identical (1459) loc\_os04g57630 12004.m10648 protein phytosulfokine receptor precursor, putative, expressed seq=cds; coord=2:2222100..2225911:1; parent\_gene=GRMZM2G452142'

'nearly identical (1456) AT1G09620 | Symbols: | ATP binding / aminoacyl-tRNA ligase/ leucine-tRNA ligase/ nucleotide binding | chr1:3113077-3116455 REVERSEnearly identical (1784) loc\_os09g32650 12009.m06352 protein leucyl-tRNA synthetase, cytoplasmic, putative, expressed seq=cds; coord=2:3098932..3104990:1; parent\_gene=GRMZM2G071333'

'moderately similar to ( 318) AT3G61060 | Symbols: AtPP2-A13 | AtPP2-A13 (Arabidopsis thaliana phloem protein 2-A13); carbohydrate binding | chr3:22603166-22604336 FORWARDmoderately similar to ( 485) loc\_os04g48270 12004.m35429 protein ATPP2-A13, putative, expressed seq=cds; coord=2:16654256..16656867:-1; parent\_gene=GRMZM2G081032'

'weakly similar to ( 171) AT3G60720 | Symbols: PDLP8 | PDLP8 (PLASMODESMATA-LOCATED PROTEIN 8) | chr3:22442035-22443608 FORWARDmoderately similar to ( 305) loc\_os04g45460 12004.m09499 protein secretory protein-like, putative, expressed seq=cds; coord=2:22574071..22577248:-1; parent\_gene=GRMZM2G062471'

'moderately similar to ( 395) AT1G04020 | Symbols: ATBARD1, BARD1 | BARD1 (BREAST CANCER ASSOCIATED RING 1); DNA binding / transcription coactivator | chr1:1036610-1040045 FORWARDhighly similar to ( 882) loc\_os04g43300 12004.m09294 protein ATBRCA1, putative, expressed seq=cds; coord=2:28673566..28677785:-1; parent\_gene=GRMZM2G052688'

'moderately similar to ( 395) AT1G04020 | Symbols: ATBARD1, BARD1 | BARD1 (BREAST CANCER ASSOCIATED RING 1); DNA binding / transcription coactivator | chr1:1036610-1040045 FORWARDhighly similar to ( 882) loc\_os04g43300 12004.m09294 protein ATBRCA1, putative, expressed seq=cds; coord=2:28673566..28677785:-1; parent\_gene=GRMZM2G052688'

'weakly similar to ( 171) ATMG01275 | Symbols: NAD1A, NAD1, ND1 | Encodes subunit of mitochondrial NAD(P)H dehydrogenase that is trans-spliced from three precursors, NAD1A, NAD1B, and NAD1C. | chrM:318004-318390 REVERSEweakly similar to ( 181) NU1M\_OENBE NADH-ubiquinone oxidoreductase chain 1 (EC 1.6.5.3) (NADH dehydrogenase subunit 1) - *Oenothera bertiana* (Bertero's evening primrose) seq=cds; coord=9:68016311..68020591:1; parent\_gene=GRMZM2G141605'

'moderately similar to ( 228) AT2G25810 | Symbols: TIP4;1 | TIP4;1 (tonoplast intrinsic protein 4;1); water channel | chr2:11012658-11013906 FORWARDmoderately similar to ( 287) TIP42\_ORYSA Probable aquaporin TIP4.2 (Tonoplast intrinsic protein 4.2) (*OsTIP4.2*) - *Oryza sativa* (Rice)moderately similar to ( 287) loc\_os01g13130 12001.m07923 protein aquaporin TIP4.1, putative, expressed seq=cds; coord=3:13529209..13532077:1; parent\_gene=GRMZM2G146627'

'very weakly similar to (91.3) AT1G65870 | Symbols: | disease resistance-responsive family protein | chr1:24503624-24504193 FORWARDweakly similar to ( 169) loc\_os07g42520 12007.m08484 protein dirigent-like protein pDIR12, putative, expressed seq=cds; coord=3:17116070..17116597:1; parent\_gene=AC215260.3\_FG001'

'very weakly similar to (91.3) AT1G65870 | Symbols: | disease resistance-responsive family protein | chr1:24503624-24504193 FORWARDweakly similar to ( 169) loc\_os07g42520 12007.m08484 protein dirigent-like protein pDIR12, putative, expressed seq=cds; coord=3:17116070..17116597:1; parent\_gene=AC215260.3\_FG001'

'weakly similar to ( 152) AT1G53540 | Symbols: | 17.6 kDa class I small heat shock protein (HSP17.6C-CI) (AA 1-156) | chr1:19980510-19980983 FORWARDweakly similar to ( 179) HSP11\_ORYSA 16.9 kDa class I heat shock protein 1 - *Oryza sativa* (Rice)weakly similar to ( 179) loc\_os01g04370 12001.m07072 protein 16.9 kDa class I heat shock protein 1, putative, expressed seq=cds; coord=3:20425735..20426696:-1; parent\_gene=GRMZM2G437100'

'moderately similar to ( 275) AT1G19660 | Symbols: | wound-responsive family protein | chr1:6800361-6802240 REVERSEmoderately similar to ( 422) loc\_os01g50622 12001.m150696 protein wound inducive gene, putative, expressed seq=cds; coord=3:114083665..114087490:-1; parent\_gene=GRMZM2G028665'

'weakly similar to ( 159) AT2G38090 | Symbols: | myb family transcription factor | chr2:15945278-15946775 FORWARDmoderately similar to ( 232) loc\_os01g64360 12001.m12550 protein DNA binding protein, putative, expressed seq=cds; coord=3:176433983..176435494:-1; parent\_gene=GRMZM2G027914'

'weakly similar to ( 182) AT5G15240 | Symbols: | amino acid transporter family protein | chr5:4947762-4950211 FORWARDmoderately similar to ( 288) loc\_os01g41400 12001.m10407 protein amino acid permease, putative, expressed seq=cds; coord=3:222933071..222933984:-1; parent\_gene=GRMZM2G476954'

'weakly similar to ( 135) AT3G25470 | Symbols: | bacterial hemolysin-related | chr3:9233039-9235022 FORWARDweakly similar to ( 166) loc\_os11g14230 12011.m05560 protein hemolysin A, putative, expressed seq=cds; coord=4:12043149..12045067:-1; parent\_gene=GRMZM2G010056'

'highly similar to ( 756) AT3G09100 | Symbols: | mRNA capping enzyme family protein | chr3:2788435-2792913 REVERSEnearly identical (1124) loc\_os11g11070 12011.m80137 protein mRNA capping enzyme, putative, expressed seq=cds; coord=4:12580010..12609706:1; parent\_gene=GRMZM2G030463'

'moderately similar to ( 358) AT5G44400 | Symbols: | FAD-binding domain-containing protein | chr5:17886365-17888071 REVERSEhighly similar to ( 615) loc\_os11g30310 12011.m06940 protein reticuline oxidase precursor, putative seq=cds; coord=4:17740852..17742683:-1; parent\_gene=GRMZM2G173105'

'weakly similar to ( 197) AT4G14465 | Symbols: | DNA-binding protein-related | chr4:8320972-8321817 FORWARDmoderately similar to ( 239) loc\_os08g44910 12008.m08462 protein DNA-binding protein, putative, expressed seq=cds; coord=4:49728248..49730155:1; parent\_gene=GRMZM2G173479'

'nearly identical (1048) AT3G44600 | Symbols: CYP71 | CYP71 (CYCLOPHILIN71); chromatin binding / histone binding / peptidyl-prolyl cis-trans isomerase | chr3:16165368-16169201 REVERSEweakly similar to ( 143) CYPB\_VICFA Peptidyl-prolyl cis-trans isomerase, chloroplast precursor (EC 5.2.1.8) (PPIase) (Rotamase) (Cyclophilin) (Cyclosporin A-binding protein) (CYP B) - Vicia faba (Broad bean)nearly identical (1172) loc\_os08g44330 12008.m26789 protein peptidyl-prolyl cis-trans isomerase, putative, expressed seq=cds; coord=4:53440616..53446854:-1; parent\_gene=GRMZM2G049525'

'weakly similar to ( 119) loc\_os02g33710 12002.m08462 protein histidine decarboxylase, putative, expressed seq=cds; coord=4:112611130..112612458:1; parent\_gene=AC217811.3\_FG002'

'moderately similar to ( 452) AT4G14340 | Symbols: CKI1, CKL11 | CKI1 (CASEIN KINASE I); kinase/ protein serine/threonine kinase | chr4:8248532-8251668 REVERSEhighly similar to ( 595) loc\_os02g40860 12002.m09171 protein casein kinase I isoform delta-like, putative, expressed seq=cds; coord=4:142153473..142160815:1; parent\_gene=GRMZM2G162637'

'highly similar to ( 687) AT1G79640 | Symbols: | ATP binding / kinase/ protein kinase/ protein serine/threonine kinase/ protein tyrosine kinase | chr1:29966913-29971387 REVERSEweakly similar to ( 152) M2K1\_ORYSA Mitogen-activated protein kinase kinase 1 (EC 2.7.12.2) (MAP kinase kinase 1) (MAPKK1) (OsMEK1) - Oryza sativa (Rice)highly similar to ( 865) loc\_os02g54900 12002.m10518 protein STE20/SPS1-related proline-alanine-rich protein kinase, putative, expressed seq=cds; coord=4:174766200..174772539:-1; parent\_gene=GRMZM2G135073'

'highly similar to ( 687) AT1G79640 | Symbols: | ATP binding / kinase/ protein kinase/ protein serine/threonine kinase/ protein tyrosine kinase | chr1:29966913-29971387 REVERSEweakly similar to ( 152) M2K1\_ORYSA Mitogen-activated protein kinase kinase 1 (EC 2.7.12.2) (MAP kinase kinase 1) (MAPKK1) (OsMEK1) - Oryza sativa (Rice)highly similar to ( 865) loc\_os02g54900 12002.m10518 protein STE20/SPS1-related proline-alanine-rich protein kinase, putative, expressed seq=cds; coord=4:174766200..174772539:-1; parent\_gene=GRMZM2G135073'

'highly similar to ( 687) AT1G79640 | Symbols: | ATP binding / kinase/ protein kinase/ protein serine/threonine kinase/ protein tyrosine kinase | chr1:29966913-29971387 REVERSEweakly similar to ( 152) M2K1\_ORYSA Mitogen-activated protein kinase kinase 1 (EC 2.7.12.2) (MAP kinase kinase 1) (MAPKK1) (OsMEK1) - Oryza sativa (Rice)highly similar to ( 865) loc\_os02g54900 12002.m10518 protein STE20/SPS1-related proline-alanine-rich protein kinase, putative, expressed seq=cds; coord=4:174766200..174772539:-1; parent\_gene=GRMZM2G135073'

'highly similar to ( 658) AT1G19170 | Symbols: | glycoside hydrolase family 28 protein / polygalacturonase (pectinase) family protein | chr1:6616777-6618875 FORWARDweakly similar to ( 112) PGLR\_ACTCH Polygalacturonase precursor (EC 3.2.1.15) (PG) (Pectinase) - Actinidia chinensis (Kiwi) (Yangtao)highly similar to ( 592) loc\_os09g26800 12009.m05832 protein polygalacturonase, putative, expressed seq=cds; coord=4:176647392..176650969:1; parent\_gene=GRMZM2G047414'

'highly similar to ( 520) AT1G05380 | Symbols: | DNA binding | chr1:1577231-1582190 FORWARDhighly similar to ( 945) loc\_os03g53630 12003.m10334 protein DNA binding protein, putative, expressed seq=cds; coord=5:7443884..7459423:-1; parent\_gene=GRMZM2G087482'

'highly similar to ( 648) AT4G14680 | Symbols: APS3 | APS3; sulfate adenylyltransferase (ATP) | chr4:8413443-8415311 REVERSEhighly similar to ( 767) loc\_os03g53230 12003.m10296 protein bifunctional 3-phosphoadenosine 5-phosphosulfate synthetase, putative, expressed seq=cds; coord=5:7702248..7706223:1; parent\_gene=GRMZM2G051270'

'moderately similar to ( 263) AT2G18980 | Symbols: | peroxidase, putative | chr2:8233419-8235294 REVERSEweakly similar to ( 182) PERP7\_BRARA Peroxidase P7 (EC 1.11.1.7) (TP7) - Brassica rapa (Turnip)moderately similar to ( 396) loc\_os06g48010 12006.m09327 protein peroxidase 16 precursor, putative, expressed seq=cds; coord=5:53198317..53200020:-1; parent\_gene=GRMZM2G142011'

'moderately similar to ( 280) AT5G23730 | Symbols: | nucleotide binding | chr5:8005286-8006392 FORWARDweakly similar to ( 116) COP1\_PEA E3 ubiquitin ligase protein COP1 (EC 6.3.2.-) (Constitutive photomorphogenesis protein 1) - Pisum sativum (Garden pea)moderately similar to ( 453) loc\_os02g02380 12002.m05587 protein SPA4, putative seq=cds; coord=5:69307253..69308503:-1; parent\_gene=GRMZM2G389155'

'moderately similar to ( 280) AT5G23730 | Symbols: | nucleotide binding | chr5:8005286-8006392 FORWARDweakly similar to ( 116) COP1\_PEA E3 ubiquitin ligase protein COP1 (EC 6.3.2.-) (Constitutive photomorphogenesis protein 1) - Pisum sativum (Garden pea)moderately similar to ( 453) loc\_os02g02380 12002.m05587 protein SPA4, putative seq=cds; coord=5:69307253..69308503:-1; parent\_gene=GRMZM2G389155'

'moderately similar to ( 343) AT1G50440 | Symbols: | zinc finger (C3HC4-type RING finger) family protein | chr1:18686099-18687646 FORWARDmoderately similar to ( 466) loc\_os02g03950 12002.m33537 protein zinc finger, C3HC4 type family protein, expressed seq=cds; coord=5:74902955..74910523:1; parent\_gene=GRMZM2G072142'

'weakly similar to ( 189) AT5G38020 | Symbols: | S-adenosyl-L-methionine:carboxyl methyltransferase family protein | chr5:15165953-15167612 REVERSEweakly similar to ( 186) BAMT\_ANTMA Benzoate carboxyl methyltransferase (EC 2.1.1.-) (S-adenosyl-L-methionine:benzoic acid carboxyl methyltransferase) - Antirrhinum majus (Garden snapdragon)moderately similar to ( 322) loc\_os06g13310 12006.m06046 protein benzoate carboxyl methyltransferase, putative seq=cds; coord=5:77571906..77574552:1; parent\_gene=GRMZM2G303419'

'moderately similar to ( 438) AT4G30200 | Symbols: VEL1 | Encodes a protein with similarity to VRN5 and VIN3.Contains both a fibronectin III and PHD finger domain. VEL1 is a part of a polycomb repressive complex (PRC2) that is involved in epigenetic silencing of the FLC flowering locus. | chr4:14786852-14790070 REVERSEnearly identical (1080) loc\_os02g05840 12002.m05932 protein expressed protein seq=cds; coord=5:80828457..80835734:-1; parent\_gene=GRMZM2G425774'



'very weakly similar to (82.8) AT1G71450 | Symbols: | AP2 domain-containing transcription factor, putative | chr1:26927088-26927639 FORWARDweakly similar to ( 166) loc\_os02g35240 12002.m08612 protein dehydration-responsive element-binding protein 1A, putative seq=cds; coord=5:174160362..174160921:1; parent\_gene=GRMZM2G087040'

'weakly similar to ( 107) AT3G01490 | Symbols: | protein kinase, putative | chr3:191095-193258 REVERSEweakly similar to ( 114) loc\_os01g45380 12001.m10741 protein ATP binding protein, putative, expressed seq=cds; coord=5:185221807..185225537:1; parent\_gene=GRMZM2G463711'

'weakly similar to ( 149) AT5G40370 | Symbols: | glutaredoxin, putative | chr5:16147826-16148900 REVERSEweakly similar to ( 155) GLRX\_ORYSA Glutaredoxin - Oryza sativa (Rice)weakly similar to ( 166) loc\_os02g40500 12002.m09136 protein OsGrx\_C2.1 - glutaredoxin subgroup I, expressed seq=cds; coord=5:185405145..185408787:1; parent\_gene=GRMZM2G148387'

'moderately similar to ( 392) AT5G51740 | Symbols: | peptidase M48 family protein | chr5:21017110-21018987 FORWARDhighly similar to ( 577) loc\_os02g50230 12002.m10057 protein peptidase family M48 containing protein, expressed seq=cds; coord=5:205230215..205235779:1; parent\_gene=GRMZM2G090981'

'highly similar to ( 629) AT1G59900 | Symbols: AT-E1 ALPHA | AT-E1 ALPHA; oxidoreductase, acting on the aldehyde or oxo group of donors, disulfide as acceptor / pyruvate dehydrogenase (acetyl-transferring) | chr1:22051368-22053660 FORWARDhighly similar to ( 631) ODPAL\_SOLTU Pyruvate dehydrogenase E1 component subunit alpha, mitochondrial precursor (EC 1.2.4.1) (PDHE1-A) - Solanum tuberosum (Potato)highly similar to ( 712) loc\_os02g50620 12002.m10096 protein pyruvate dehydrogenase E1 component alpha subunit, mitochondrial precursor, putative, expressed seq=cds; coord=5:205777032..205781614:-1; parent\_gene=GRMZM2G140150'

'moderately similar to ( 273) AT5G10770 | Symbols: | chloroplast nucleoid DNA-binding protein, putative | chr5:3403331-3405331 REVERSEhighly similar to ( 542) loc\_os06g20190 12006.m06676 protein aspartic proteinase nepenthesin-2 precursor, putative seq=cds; coord=6:120847595..120849186:1; parent\_gene=GRMZM2G174129'

'very weakly similar to (81.3) AT2G35040 | Symbols: | AICARFT/IMPCHase bienzyme family protein | chr2:14765347-14768269 REVERSEvery weakly similar to (82.4) loc\_os08g10570 12008.m26473 protein bifunctional purine biosynthesis protein purH, putative, expressed seq=cds; coord=6:121022185..121024287:1; parent\_gene=GRMZM2G164665'

'very weakly similar to (83.6) loc\_os05g06890 12005.m05216 protein relA-SpoT like protein RSH4, putative, expressed seq=cds; coord=6:125189402..125190276:-1; parent\_gene=GRMZM2G152040'

'moderately similar to ( 426) AT5G20490 | Symbols: XIK, ATXIK, XI-17 | XIK; motor/ protein binding | chr5:6927064 6936079 REVERSEmoderately similar to ( 498) loc\_os05g46030 12005.m08728 protein myosin head family protein, expressed seq=cds; coord=6:161483674..161486706:1; parent\_gene=GRMZM2G445423'

'weakly similar to ( 102) AT3G21330 | Symbols: | basic helix-loop-helix (bHLH) family protein | chr3:7507720-7508841 FORWARDweakly similar to ( 130) loc\_os05g46370 12005.m08762 protein helix-loop-helix DNA-binding domain containing protein, expressed seq=cds; coord=6:161863300..161865047:1; parent\_gene=GRMZM2G094892'

'highly similar to ( 932) AT1G24510 | Symbols: | T-complex protein 1 epsilon subunit, putative / TCP-1-epsilon, putative / chaperonin, putative | chr1:8685504-8687660 REVERSEhighly similar to ( 941) TCPE2\_AVESA T-complex protein 1 subunit epsilon (TCP-1-epsilon) (CCT-epsilon) (TCP-K36) - Avena sativa (Oat)highly similar to ( 985) loc\_os06g36700 12006.m08205 protein T-complex protein 1 subunit epsilon, putative, expressed seq=cds; coord=7:2584958..2590700:-1; parent\_gene=GRMZM2G043383'

'moderately similar to ( 308) AT4G08150 | Symbols: KNAT1, BP, BP1 | KNAT1 (KNOTTED-LIKE FROM ARABIDOPSIS THALIANA); transcription factor | chr4:5147969-5150610 REVERSEmoderately similar to ( 463) RSH1\_MAIZE Homeobox protein rough sheath 1 - Zea mays (Maize)moderately similar to ( 427) loc\_os07g03770 12007.m04847 protein homeobox protein rough sheath 1, putative, expressed seq=cds; coord=7:3664698..3670891:1; parent\_gene=GRMZM2G028041'

'weakly similar to ( 111) AT3G28920 | Symbols: AtHB34 | AtHB34 (ARABIDOPSIS THALIANA HOMEBOX PROTEIN 34); DNA binding / transcription factor | chr3:10940598-10941536 REVERSEmoderately similar to ( 258) loc\_os09g24820 12009.m05636 protein ZF-HD homeobox protein, putative, expressed seq=cds; coord=7:112875599..112877310:1; parent\_gene=GRMZM2G161315'

'highly similar to ( 682) AT4G02050 | Symbols: | sugar transporter, putative | chr4:898387-900095 REVERSEhighly similar to ( 651) STA\_RICCO Sugar carrier protein A - Ricinus communis (Castor bean)highly similar to ( 743) loc\_os09g24924 12009.m05646 protein sugar carrier protein A, putative, expressed seq=cds; coord=7:113163366..113166072:1; parent\_gene=GRMZM2G029153'

'moderately similar to ( 302) AT2G23810 | Symbols: TET8 | TET8 (TETRASPANIN8) | chr2:10135859-10137352 REVERSEmoderately similar to ( 396) loc\_os09g25760 12009.m05728 protein senescence-associated protein DH, putative, expressed seq=cds; coord=7:118310662..118312830:1; parent\_gene=GRMZM2G041175'

'weakly similar to ( 133) AT5G63370 | Symbols: | protein kinase family protein | chr5:25384954-25386390 REVERSEweakly similar to ( 107) MPK16\_ORYSA Mitogen-activated protein kinase 16 (EC 2.7.11.24) (MAP kinase 16) - Oryza sativa (Rice)moderately similar to ( 265) loc\_os09g27350 12009.m05887 protein protein kinase domain containing protein seq=cds; coord=7:122987242..122988347:1; parent\_gene=GRMZM2G396350'

'nearly identical (1006) AT5G54830 | Symbols: | DOMON domain-containing protein / dopamine beta-monooxygenase N-terminal domain-containing protein | chr5:22273394-22276117 FORWARDnearly identical (1452) loc\_os09g38520 12009.m06793 protein DOMON domain containing protein, expressed seq=cds; coord=7:145913776..145916844:1; parent\_gene=GRMZM2G041394'

'moderately similar to ( 398) AT3G29770 | Symbols: ATMES11, MES11 | MES11 (METHYL ESTERASE 11); hydrolase | chr3:11648471-11650565 FORWARDweakly similar to ( 154) PIR7A\_ORYSA Probable esterase PIR7A (EC 3.1.-.-) - Oryza sativa (Rice)highly similar to ( 550) loc\_os07g41230 12007.m08359 protein esterase PIR7B, putative, expressed seq=cds; coord=7:163964195..163968081:1; parent\_gene=GRMZM2G151801'

'very weakly similar to (93.6) AT5G58420 | Symbols: | 40S ribosomal protein S4 (RPS4D) | chr5:23619599-23620896 FORWARDvery weakly similar to ( 100) RS4\_ORYSA 40S ribosomal protein S4 (SCAR protein SS620) - Oryza sativa (Rice)very weakly similar to ( 100) loc\_os02g01560 12002.m05506 protein 40S ribosomal protein S4, putative, expressed seq=cds; coord=7:175395356..175396189:1; parent\_gene=GRMZM2G086656'

'highly similar to ( 550) AT5G53350 | Symbols: CLPX | CLPX; ATP binding / ATPase/ nucleoside-triphosphatase/ nucleotide binding / protein binding | chr5:21644060-21647503 FORWARDhighly similar to ( 840) loc\_os01g66330 12001.m12741 protein ATP-dependent Clp protease ATP-binding subunit clpX, putative, expressed seq=cds; coord=8:164810797..164816886:1; parent\_gene=GRMZM2G172829'

'moderately similar to ( 434) AT4G06599 | Symbols: | ubiquitin family protein | chr4:3666079-3667495 REVERSEmoderately similar to ( 500) loc\_os01g65450 12001.m150790 protein ubiquitin-like domain containing CTD phosphatase 1, putative, expressed seq=cds; coord=8:165678358..165682072:1; parent\_gene=GRMZM2G114172'

'moderately similar to ( 286) AT1G36370 | Symbols: SHM7 | SHM7 (serine hydroxymethyltransferase 7); catalytic/ glycine hydroxymethyltransferase/ pyridoxal phosphate binding | chr1:13696240-13698576 REVERSEweakly similar to ( 158) GLYM\_SOLTU Serine hydroxymethyltransferase, mitochondrial precursor (EC 2.1.2.1) (Serine methylase) (Glycine hydroxymethyltransferase) (SHMT) - Solanum tuberosum (Potato)moderately similar to ( 334) loc\_os01g65410 12001.m12653 protein serine hydroxymethyltransferase, mitochondrial precursor, putative, expressed seq=cds; coord=8:165728910..165730561:-1; parent\_gene=GRMZM2G113959'

'moderately similar to ( 286) AT1G36370 | Symbols: SHM7 | SHM7 (serine hydroxymethyltransferase 7); catalytic/ glycine hydroxymethyltransferase/ pyridoxal phosphate binding | chr1:13696240-13698576 REVERSEweakly similar to ( 158) GLYM\_SOLTU Serine hydroxymethyltransferase, mitochondrial precursor (EC 2.1.2.1) (Serine methylase) (Glycine hydroxymethyltransferase) (SHMT) - Solanum tuberosum (Potato)moderately similar to ( 334) loc\_os01g65410 12001.m12653 protein serine hydroxymethyltransferase, mitochondrial precursor, putative, expressed seq=cds; coord=8:165728910..165730561:-1; parent\_gene=GRMZM2G113959'

'moderately similar to ( 286) AT1G36370 | Symbols: SHM7 | SHM7 (serine hydroxymethyltransferase 7); catalytic/ glycine hydroxymethyltransferase/ pyridoxal phosphate binding | chr1:13696240-13698576 REVERSEweakly similar to ( 158) GLYM\_SOLTU Serine hydroxymethyltransferase, mitochondrial precursor (EC 2.1.2.1) (Serine methylase) (Glycine hydroxymethyltransferase) (SHMT) - Solanum tuberosum (Potato)moderately similar to ( 334) loc\_os01g65410 12001.m12653 protein serine hydroxymethyltransferase, mitochondrial precursor, putative, expressed seq=cds; coord=8:165728910..165730561:-1; parent\_gene=GRMZM2G113959'

'weakly similar to ( 181) AT2G40330 | Symbols: | Bet v I allergen family protein | chr2:16845177-16845824 REVERSEmoderately similar to ( 208) loc\_os05g39580 12005.m08136 protein AT-rich element binding factor 3, putative, expressed seq=cds; coord=8:169996084..170002291:-1; parent\_gene=GRMZM2G169695'

'moderately similar to ( 279) AT2G20110 | Symbols: | tesmin/TSO1-like CXC domain-containing protein | chr2:8684496-8686870 FORWARDmoderately similar to ( 485) loc\_os01g55580 12001.m43204 protein tesmin/TSO1-like CXC domain containing protein, expressed seq=cds; coord=8:173389290..173393839:1; parent\_gene=GRMZM2G104246'

'moderately similar to ( 279) AT2G20110 | Symbols: | tesmin/TSO1-like CXC domain-containing protein | chr2:8684496-8686870 FORWARDmoderately similar to ( 485) loc\_os01g55580 12001.m43204 protein tesmin/TSO1-like CXC domain containing protein, expressed seq=cds; coord=8:173389290..173393839:1; parent\_gene=GRMZM2G104246'

'weakly similar to ( 157) AT5G66190 | Symbols: ATLFNR1 | FNR1 (FERREDOXIN-NADP(

'weakly similar to ( 186) AT3G08570 | Symbols: | protein binding / signal transducer | chr3:2602258-2604412 REVERSEweakly similar to ( 135) NPH3\_ORYSA Coleoptile phototropism protein 1 (Non-phototropic hypocotyl 3-like protein) (NPH3-like protein) - Oryza sativa (Rice)moderately similar to ( 277) loc\_os12g02540 12012.m04255 protein transposon protein, putative, Mutator sub-class, expressed seq=cds; coord=10:3184922..3188148:1; parent\_gene=GRMZM2G058531'

'weakly similar to ( 120) AT3G14470 | Symbols: | disease resistance protein (NBS-LRR class), putative | chr3:4857940-4861104 FORWARDhighly similar to ( 719) loc\_os01g57340 12001.m11885 protein rp1-like protein, putative, expressed seq=cds; coord=10:3764373..3766967:-1; parent\_gene=GRMZM2G349565'

'moderately similar to ( 286) AT4G20860 | Symbols: | FAD-binding domain-containing protein | chr4:11172726-11174318 FORWARDhighly similar to ( 630) loc\_os08g06190 12008.m04758 protein reticuline oxidase precursor, putative, expressed seq=cds; coord=10:78060284..78062034:1; parent\_gene=GRMZM2G078906'

'weakly similar to ( 140) AT4G16270 | Symbols: | peroxidase 40 (PER40) (P40) | chr4:9205038-9206483 FORWARDweakly similar to ( 132) PERN\_IPOBA Neutral peroxidase precursor (EC 1.11.1.7) (SwPN1) - Ipomoea batatas (Sweet potato) (Batate)moderately similar to ( 279) loc\_os05g04410 12005.m04974 protein peroxidase 2 precursor, putative, expressed seq=cds; coord=10:85683513..85689992:1; parent\_gene=GRMZM2G006727'

'weakly similar to ( 157) AT3G09980 | Symbols: | unknown protein | chr3:3069358-3071145 FORWARDmoderately similar to ( 218) loc\_os04g33450 12004.m35299 protein expressed protein seq=cds; coord=10:113709280..113710910:-1; parent\_gene=GRMZM2G147390'

'weakly similar to ( 101) loc\_os03g20760 12003.m07483 protein lipid binding protein, putative, expressed seq=cds; coord=1:52625970..52627201:-1; parent\_gene=GRMZM2G174680'

'weakly similar to ( 199) AT1G12140 | Symbols: FMO GS-OX5 | FMO GS-OX5 (FLAVIN-MONOOXYGENASE GLUCOSINOLATE S-OXYGENASE 5); 8-methylthiopropyl glucosinolate S-oxygenase/ flavin-containing monooxygenase/ monooxygenase | chr1:4121386-4123366 FORWARDmoderately similar to ( 263) loc\_os10g40610 12010.m06829 protein disulfide oxidoreductase/ monooxygenase, putative, expressed seq=cds; coord=1:92342987..92345452:1; parent\_gene=GRMZM2G425719'

'moderately similar to ( 351) AT5G47100 | Symbols: CBL9 | CBL9; calcium ion binding | chr5:19129896-19131727 REVERSEmoderately similar to ( 402) loc\_os10g41510 12010.m06915 protein calcineurin B-like protein 9, putative, expressed seq=cds; coord=1:94985068..94989733:1; parent\_gene=GRMZM2G107575'

'highly similar to ( 562) AT3G22330 | Symbols: PMH2 | PMH2 (putative mitochondrial RNA helicase 2); ATP binding / ATP-dependent helicase/ helicase/ nucleic acid binding | chr3:7892641-7895145 FORWARDmoderately similar to ( 291) RH7\_SPIOL DEAD-box ATP-dependent RNA helicase 7 (EC 3.6.1.-) - Spinacia oleracea (Spinach)highly similar to ( 588) loc\_os07g05050 12007.m04971 protein nucleolar RNA helicase 2, putative, expressed seq=cds; coord=1:172936435..172940871:-1; parent\_gene=GRMZM2G107984'

'weakly similar to ( 131) AT1G30500 | Symbols: NF-YA7 | NF-YA7 (NUCLEAR FACTOR Y, SUBUNIT A7); specific transcriptional repressor/ transcription factor | chr1:10804736-10805896 REVERSEmoderately similar to ( 290) loc\_os12g41880 12012.m26973 protein nuclear transcription factor Y subunit A-7, putative, expressed seq=cds; coord=1:173316803..173321819:-1; parent\_gene=GRMZM2G361842'

'weakly similar to ( 171) AT4G36260 | Symbols: STY2, SRS2 | STY2 (STYLISH 2); transcription factor | chr4:17155705-17157006 REVERSEmoderately similar to ( 244) loc\_os08g43410 12008.m08315 protein SHI, putative, expressed seq=cds; coord=1:207389667..207391680:1; parent\_gene=GRMZM2G042407'

'moderately similar to ( 335) AT1G14270 | Symbols: | CAAX amino terminal protease family protein | chr1:4875099-4876443 REVERSEmoderately similar to ( 419) loc\_os09g24670 12009.m60228 protein CAAX amino terminal protease family protein, putative, expressed seq=cds; coord=1:212977758..212982384:-1; parent\_gene=GRMZM2G152485'

'moderately similar to ( 446) AT2G35160 | Symbols: SUVH5, SGD9 | SUVH5 (SU(VAR)3-9 HOMOLOG 5); histone methyltransferase | chr2:14823562-14825946 FORWARDhighly similar to ( 683) loc\_os08g30910 12008.m07091 protein YDG/SRA domain containing protein, expressed seq=cds; coord=1:220005584..220009243:-1; parent\_gene=GRMZM2G074094'

'moderately similar to ( 384) AT1G61790 | Symbols: | OST3/OST6 family protein | chr1:22814390-22815430 FORWARDhighly similar to ( 535) loc\_os03g36730 12003.m08792 protein oligosaccharide transporter, putative, expressed seq=cds; coord=1:222130457..222134768:1; parent\_gene=GRMZM2G149946'

'highly similar to ( 687) AT5G37020 | Symbols: ARF8 | ARF8 (AUXIN RESPONSE FACTOR 8); transcription factor | chr5:14630151-14633916 FORWARDnearly identical (1283) loc\_os04g57610 12004.m35224 protein auxin response factor 8, putative, expressed seq=cds; coord=2:2266715..2274671:1; parent\_gene=GRMZM2G078274'

'highly similar to ( 687) AT5G37020 | Symbols: ARF8 | ARF8 (AUXIN RESPONSE FACTOR 8); transcription factor | chr5:14630151-14633916 FORWARDnearly identical (1283) loc\_os04g57610 12004.m35224 protein auxin response factor 8, putative, expressed seq=cds; coord=2:2266715..2274671:1; parent\_gene=GRMZM2G078274'

'nearly identical (1518) AT4G30190 | Symbols: AHA2, PMA2 | AHA2; ATPase/ hydrogen-exporting ATPase, phosphorylative mechanism | chr4:14770820-14775920 REVERSEnearly identical (1675) PMA1\_ORYSA Plasma membrane ATPase (EC 3.6.3.6) (Proton pump) - Oryza sativa (Rice)nearly identical (1675) loc\_os04g56160 12004.m101441 protein plasma membrane ATPase, putative, expressed seq=cds; coord=2:4299718..4306692:-1; parent\_gene=GRMZM2G019404'

'highly similar to ( 883) AT1G23090 | Symbols: AST91, SULTR3;3 | AST91 (SULFATE TRANSPORTER 91); sulfate transmembrane transporter | chr1:8185238-8188954 REVERSEmoderately similar to ( 348) NO70\_SOYBN Early nodulin 70 - Glycine max (Soybean)nearly identical (1099) loc\_os04g55800 12004.m10471 protein sulfate transporter 3.3, putative, expressed seq=cds; coord=2:4890135..4895146:1; parent\_gene=GRMZM2G395114'  
'moderately similar to ( 489) loc\_os04g40720 12004.m09052 protein expressed protein seq=cds; coord=2:36767527..36778587:-1; parent\_gene=GRMZM2G063163'

'weakly similar to ( 155) loc\_os04g39980 12004.m08982 protein gibberellin 20 oxidase 2, putative, expressed seq=cds; coord=2:38192410..38193491:1; parent\_gene=GRMZM2G121700'

'weakly similar to ( 147) AT4G02840 | Symbols: | small nuclear ribonucleoprotein D1, putative / snRNP core protein D1, putative / Sm protein D1, putative | chr4:1264726-1266253 FORWARDweakly similar to ( 151) loc\_os04g39444 12004.m101729 protein small nuclear ribonucleoprotein Sm D1, putative, expressed seq=cds; coord=2:39420411..39422539:1; parent\_gene=GRMZM2G027571'

'weakly similar to ( 147) AT4G02840 | Symbols: | small nuclear ribonucleoprotein D1, putative / snRNP core protein D1, putative / Sm protein D1, putative | chr4:1264726-1266253 FORWARDweakly similar to ( 151) loc\_os04g39444 12004.m101729 protein small nuclear ribonucleoprotein Sm D1, putative, expressed seq=cds; coord=2:39420411..39422539:1; parent\_gene=GRMZM2G027571'

'weakly similar to ( 106) loc\_os09g29820 12009.m06133 protein BZIP family transcription factor, putative, expressed seq=cds; coord=2:188366213..188366707:-1; parent\_gene=GRMZM2G137532'

'weakly similar to ( 130) AT1G56170 | Symbols: HAP5B, ATHAP5B, NF-YC2 | NF-YC2 (NUCLEAR FACTOR Y, SUBUNIT C2); DNA binding / transcription activator/ transcription factor | chr1:21025118-21025717 FORWARDweakly similar to ( 141) loc\_os09g30310 12009.m06182 protein nuclear transcription factor Y subunit C-2, putative, expressed seq=cds; coord=2:189204687..189208176:-1; parent\_gene=GRMZM2G022162'

'moderately similar to ( 485) AT4G39170 | Symbols: | SEC14 cytosolic factor, putative / phosphoglyceride transfer protein, putative | chr4:18240887-18243621 FORWARDhighly similar to ( 822) loc\_os09g30330 12009.m06184 protein phosphatidylinositol transporter/ transporter, putative, expressed seq=cds; coord=2:189219156..189224929:1; parent\_gene=GRMZM2G031837'

'moderately similar to ( 434) AT3G20810 | Symbols: | transcription factor jumonji (jmc) domain-containing protein | chr3:7275814-7278182 FORWARDhighly similar to ( 523) loc\_os09g31380 12009.m06252 protein conserved hypothetical protein seq=cds; coord=2:189777176..189782078:1; parent\_gene=GRMZM2G052908'

'moderately similar to ( 231) AT5G35330 | Symbols: MBD02, MBD2 | MBD02 (METHYL-CPG-BINDING DOMAIN PROTEIN 02); DNA binding / DNA demethylase | chr5:13523725-13525270 REVERSEmoderately similar to ( 386) loc\_os09g32090 12009.m50206 protein methyl-binding domain protein MBD111, putative, expressed seq=cds; coord=2:190664560..190686734:-1; parent\_gene=GRMZM2G025095'

'very weakly similar to (87.0) AT1G72310 | Symbols: ATL3 | ATL3; protein binding / zinc ion binding | chr1:27226405-27227379 FORWARDvery weakly similar to (80.9) EL5\_ORYSA E3 ubiquitin-protein ligase EL5 (EC 6.3.2.-) - Oryza sativa (Rice)weakly similar to ( 154) loc\_os07g42610 12007.m08493 protein ring-H2 zinc finger protein, putative, expressed seq=cds; coord=2:211590201..211591615:-1; parent\_gene=GRMZM2G358987'

'highly similar to ( 734) AT4G26270 | Symbols: PFK3 | PFK3 (PHOSPHOFRUCTOKINASE 3); 6-phosphofructokinase | chr4:13301094-13304030 REVERSEhighly similar to ( 939) loc\_os01g09570 12001.m07582 protein 6-phosphofructokinase 2, putative, expressed seq=cds; coord=3:6801004..6804943:-1; parent\_gene=GRMZM2G132069'

'nearly identical (1256) AT2G26910 | Symbols: PDR4, ATPDR4 | PDR4 (PLEIOTROPIC DRUG RESISTANCE 4); ATPase, coupled to transmembrane movement of substances | chr2:11481623-11487874 FORWARDnearly identical (1686) PDR6\_ORYSA Pleiotropic drug resistance protein 6 - Oryza sativa (Rice)nearly identical (1060) loc\_os02g11760 12002.m06425 protein PDR5-like ABC transporter, putative, expressed seq=cds; coord=3:10273100..10283228:1; parent\_gene=GRMZM2G118243'

'highly similar to ( 659) AT2G26710 | Symbols: BAS1, CYP734A1, CYP72B1 | BAS1 (PHYB ACTIVATION TAGGED SUPPRESSOR 1); oxygen binding / steroid hydroxylase | chr2:11380700-11383413 FORWARDmoderately similar to ( 372) C72A1\_CATRO Cytochrome P450 72A1 (EC 1.3.3.9) (CYPLXXII) (Secologanin synthase) (SLS) - Catharanthus roseus (Rosy periwinkle) (Madagascar periwinkle)highly similar to ( 836) loc\_os01g29150 12001.m09352 protein cytochrome P450 72A1, putative, expressed seq=cds; coord=3:11212000..11215671:1; parent\_gene=GRMZM2G138750'

'very weakly similar to (94.4) loc\_os01g24950 12001.m150578 protein exocyst complex subunit Sec15-like family protein, expressed seq=cds; coord=3:175323602..175324361:-1; parent\_gene=GRMZM2G439532'

'highly similar to ( 684) AT2G38110 | Symbols: ATGPAT6, GPAT6 | GPAT6 (GLYCEROL-3-PHOSPHATE ACYLTRANSFERASE 6); 1-acylglycerol-3-phosphate O-acyltransferase/ acyltransferase | chr2:15952816-15955364 REVERSEhighly similar to ( 835) loc\_os01g63580 12001.m12474 protein glycerol-3-phosphate acyltransferase 8, putative, expressed seq=cds; coord=3:178181704..178185282:1; parent\_gene=GRMZM2G083195'

'weakly similar to ( 139) AT5G05960 | Symbols: | protease inhibitor/seed storage/lipid transfer protein (LTP) family protein | chr5:1790256-1790694 FORWARDmoderately similar to ( 201) loc\_os01g62980 12001.m43276 protein lipid binding protein, putative, expressed seq=cds; coord=3:179414637..179416401:1; parent\_gene=GRMZM2G065557'

'moderately similar to ( 290) AT1G30350 | Symbols: | pectate lyase family protein | chr1:10710194-10711664 REVERSEmoderately similar to ( 259) PEL\_LILLO Pectate lyase precursor (EC 4.2.2.2) - Lilium longiflorum (Trumpet lily)moderately similar to ( 474) loc\_os08g18970 12008.m05967 protein major pollen allergen Jun a 1 precursor, putative seq=cds; coord=3:189464384..189466218:1; parent\_gene=AC233851.1\_FG011'

'weakly similar to ( 176) AT1G28420 | Symbols: HB-1 | HB-1 (homeobox-1); transcription factor | chr1:9979936-9987460 FORWARDhighly similar to ( 577) loc\_os01g48180 12001.m11010 protein DDT domain containing protein, expressed seq=cds; coord=3:210103369..210107016:-1; parent\_gene=GRMZM2G002548'

'weakly similar to ( 178) AT1G28600 | Symbols: | lipase, putative | chr1:10051604-10053073 REVERSEvery weakly similar to (86.7) EST\_HEVBR Esterase precursor (EC 3.1.1.-) (Early nodule-specific protein homolog) (Latex allergen Hev b 13) - Hevea brasiliensis (Para rubber tree)weakly similar to ( 194) loc\_os01g42730 12001.m10537 protein alpha-L-fucosidase 2 precursor, putative, expressed seq=cds; coord=3:213800866..213804340:-1; parent\_gene=GRMZM2G047129'

'highly similar to ( 505) AT1G53240 | Symbols: | malate dehydrogenase (NAD), mitochondrial | chr1:19854966-19856802 REVERSEhighly similar to ( 508) MDHM\_FRAAN Malate dehydrogenase, mitochondrial precursor (EC 1.1.1.37) - Fragaria ananassa (Strawberry)highly similar to ( 587) loc\_os01g46070 12001.m10806 protein malate dehydrogenase, mitochondrial precursor, putative, expressed seq=cds; coord=3:213896741..213905427:1; parent\_gene=GRMZM2G466833'

'moderately similar to ( 241) AT5G14740 | Symbols: CA2, CA18, BETA CA2 | CA2 (CARBONIC ANHYDRASE 2); carbonate dehydratase/ zinc ion binding | chr5:4758257-4762315 FORWARDmoderately similar to ( 340) CAHC\_HORVU Carbonic anhydrase, chloroplast precursor (EC 4.2.1.1) (Carbonate dehydratase) - Hordeum vulgare (Barley)moderately similar to ( 341) loc\_os01g45274 12001.m150428 protein carbonic anhydrase, chloroplast precursor, putative, expressed seq=cds; coord=3:215431519..215437533:-1; parent\_gene=GRMZM2G348512'

'moderately similar to ( 245) AT5G14740 | Symbols: CA2, CA18, BETA CA2 | CA2 (CARBONIC ANHYDRASE 2); carbonate dehydratase/ zinc ion binding | chr5:4758257-4762315 FORWARDmoderately similar to ( 340) CAHC\_HORVU Carbonic anhydrase, chloroplast precursor (EC 4.2.1.1) (Carbonate dehydratase) - Hordeum vulgare (Barley)moderately similar to ( 340) loc\_os01g45274 12001.m150428 protein carbonic anhydrase, chloroplast precursor, putative, expressed seq=cds; coord=3:215466579..215473931:-1; parent\_gene=GRMZM2G121878'

'weakly similar to ( 159) AT5G44340 | Symbols: TUB4 | TUB4; structural constituent of cytoskeleton | chr5:17859442-17860994 REVERSEweakly similar to ( 171) TBB7\_MAIZE Tubulin beta-7 chain (Beta-7 tubulin) - Zea mays (Maize)weakly similar to ( 169) loc\_os02g07060 12002.m06053 protein tubulin beta-5 chain, putative, expressed seq=cds; coord=4:32162277..32162762:1; parent\_gene=AC203909.3\_FG006'

'highly similar to ( 528) AT3G47520 | Symbols: MDH | MDH (MALATE DEHYDROGENASE); L-malate dehydrogenase/ binding / catalytic/ malate dehydrogenase/ oxidoreductase/ oxidoreductase, acting on the CH-OH group of donors, NAD or NADP as acceptor | chr3:17513657-17514868 FORWARDmoderately similar to ( 390) MDHG\_ORYSA Malate dehydrogenase, glyoxysomal precursor (EC 1.1.1.37) - Oryza sativa (Rice)highly similar to ( 650) loc\_os08g33720 12008.m07362 protein malate dehydrogenase, mitochondrial precursor, putative, expressed seq=cds; coord=4:83505768..83508091:1; parent\_gene=GRMZM2G068455'

'very weakly similar to (94.4) AT2G41940 | Symbols: ZFP8 | ZFP8 (ZINC FINGER PROTEIN 8); nucleic acid binding / transcription factor/ zinc ion binding | chr2:17507556-17508329 FORWARDweakly similar to ( 187) loc\_os02g53530 12002.m10382 protein zinc finger protein, putative, expressed seq=cds; coord=4:177327886..177329473:1; parent\_gene=GRMZM2G121151'



'moderately similar to ( 251) AT5G64930 | Symbols: CPR5, HYS1 | CPR5 (CONSTITUTIVE EXPRESSION OF PR GENES 5) | chr5:25945885-25948321 REVERSEhighly similar to ( 576) loc\_os02g53070 12002.m10337 protein HYS1, putative, expressed seq=cds; coord=4:178037799..178042552:1; parent\_gene=GRMZM2G158811'

'moderately similar to ( 251) AT5G64930 | Symbols: CPR5, HYS1 | CPR5 (CONSTITUTIVE EXPRESSION OF PR GENES 5) | chr5:25945885-25948321 REVERSEhighly similar to ( 576) loc\_os02g53070 12002.m10337 protein HYS1, putative, expressed seq=cds; coord=4:178037799..178042552:1; parent\_gene=GRMZM2G158811'

'moderately similar to ( 399) AT1G77800 | Symbols: | PHD finger family protein | chr1:29253800-29260190 FORWARDhighly similar to ( 842) loc\_os02g52960 12002.m10326 protein PHD-finger family protein, expressed seq=cds; coord=4:178229465..178238103:1; parent\_gene=GRMZM2G475583'

'very weakly similar to (98.6) AT1G21910 | Symbols: | AP2 domain-containing transcription factor family protein | chr1:7696655-7697347 FORWARDweakly similar to ( 167) loc\_os06g10780 12006.m05795 protein DNA binding protein, putative, expressed seq=cds; coord=4:178386285..178387653:1; parent\_gene=GRMZM2G011110'

'nearly identical (1220) AT2G07050 | Symbols: CAS1 | CAS1 (cycloartenol synthase 1); cycloartenol synthase | chr2:2924629-2930295 FORWARDnearly identical (1393) loc\_os02g04710 12002.m33547 protein cycloartenol synthase, putative, expressed seq=cds; coord=4:237767177..237775740:1; parent\_gene=GRMZM2G065494'

'moderately similar to ( 394) AT5G26680 | Symbols: | endonuclease, putative | chr5:9311882-9315458 REVERSEmoderately similar to ( 474) FEN1B\_ORYSA Flap endonuclease 1b (EC 3.1.-.-) (OsFEN-1b) - Oryza sativa (Rice)moderately similar to ( 474) loc\_os03g61820 12003.m11063 protein flap endonuclease 1b, putative, expressed seq=cds; coord=5:1879148..1895175:1; parent\_gene=GRMZM2G398668'

'highly similar to ( 618) AT5G38640 | Symbols: | eukaryotic translation initiation factor 2B family protein / eIF-2B family protein | chr5:15468020-15470674 REVERSEhighly similar to ( 832) loc\_os03g44310 12003.m09470 protein translation initiation factor eIF-2B delta subunit, putative, expressed seq=cds; coord=5:17058108..17064678:1; parent\_gene=GRMZM2G018943'

'highly similar to ( 655) AT5G15650 | Symbols: RGP2, ATRGP2 | RGP2 (REVERSIBLY GLYCOSYLATED POLYPEPTIDE 2); transferase, transferring hexosyl groups | chr5:5092203-5094093 FORWARDhighly similar to ( 739) UPTG\_MAIZE Alpha-1,4-glucan-protein synthase [UDP-forming] (EC 2.4.1.112) (UDP-glucose:protein transglucosylase) (UPTG) (Amylogenin) (Golgi-associated protein se-wap41) - Zea mays (Maize)highly similar to ( 714) loc\_os03g40270 12003.m35306 protein alpha-1,4-glucan-protein synthase, putative, expressed seq=cds; coord=5:18767810..18770458:1; parent\_gene=GRMZM2G087326'

'moderately similar to ( 411) AT1G52870 | Symbols: | peroxisomal membrane protein-related | chr1:19685856-19687678 FORWARDhighly similar to ( 536) loc\_os03g38730 12003.m35298 protein mpv17 / PMP22 family protein, expressed seq=cds; coord=5:19890055..19894035:1; parent\_gene=GRMZM2G001724'

'moderately similar to ( 253) AT1G33260 | Symbols: | protein kinase family protein | chr1:12064796-12066114 FORWARDweakly similar to ( 166) CRI4\_MAIZE Putative receptor protein kinase CRINKLY4 precursor (EC 2.7.11.1) - Zea mays (Maize)moderately similar to ( 478) loc\_os10g37190 12010.m06516 protein protein kinase domain containing protein, expressed seq=cds; coord=5:22355892..22357850:1; parent\_gene=GRMZM2G166719'

'highly similar to ( 600) AT4G36195 | Symbols: | serine carboxypeptidase S28 family protein | chr4:17127202-17129787 FORWARDhighly similar to ( 748) loc\_os10g36780 12010.m06484 protein prolyl carboxypeptidase like protein, putative, expressed seq=cds; coord=5:22758895..22762980:-1; parent\_gene=GRMZM2G082502'

'weakly similar to ( 188) AT2G46910 | Symbols: | plastid-lipid associated protein PAP / fibrillin family protein | chr2:19272427-19273856 FORWARD seq=cds; coord=5:23255313..23259490:-1; parent\_gene=GRMZM2G026800'

'moderately similar to ( 448) AT1G02050 | Symbols: | chalcone and stilbene synthase family protein | chr1:359164-360441 REVERSEmoderately similar to ( 261) THS1\_VITVI Stilbene synthase 1 (EC 2.3.1.95) (Resveratrol synthase 1) (Trihydroxystilbene synthase 1) (PSV25) - Vitis vinifera (Grape)highly similar to ( 619) loc\_os10g34360 12010.m06262 protein chalcone synthase G, putative, expressed seq=cds; coord=5:26971466..26975726:1; parent\_gene=GRMZM2G477683'

'weakly similar to ( 122) AT1G06890 | Symbols: | transporter-related | chr1:2111728-2114038 REVERSEweakly similar to ( 158) loc\_os10g33920 12010.m065290 protein integral membrane protein like, putative, expressed seq=cds; coord=5:28086355..28088103:-1; parent\_gene=GRMZM2G462081'

'moderately similar to ( 329) AT1G69530 | Symbols: ATEXPA1, EXP1, AT-EXP1, ATEXP1, ATHEXP ALPHA 1.2 | ATEXPA1 (ARABIDOPSIS THALIANA EXPANSIN A1) | chr1:26142034-26143200 FORWARDmoderately similar to ( 395) EXPA5\_ORYSA Expansin-A5 precursor (OsEXPA5) (Alpha-expansin-5) (OsEXP5) (OsaEXPa1.20) - Oryza sativa (Rice)moderately similar to ( 395) loc\_os02g51040 12002.m10138 protein alpha-expansin 15 precursor, putative, expressed seq=cds; coord=5:206838596..206840547:1; parent\_gene=GRMZM2G105844'

'moderately similar to ( 330) AT1G26870 | Symbols: FEZ, ANAC009 | FEZ (FEZ); transcription factor | chr1:9312856-9314983 FORWARDweakly similar to ( 194) NAC68\_ORYSA NAC domain-containing protein 68 (ONAC068) - Oryza sativa (Rice)moderately similar to ( 338) loc\_os08g33910 12008.m07381 protein NAC domain-containing protein 9, putative, expressed seq=cds; coord=5:206975367..206978937:1; parent\_gene=GRMZM2G100593'

'weakly similar to ( 172) AT5G39865 | Symbols: | glutaredoxin family protein | chr5:15965560-15966732 REVERSEmoderately similar to ( 362) loc\_os02g51370 12002.m10171 protein glutaredoxin family protein, expressed seq=cds; coord=5:207655630..207657582:-1; parent\_gene=GRMZM2G118366'

'moderately similar to ( 407) AT4G39770 | Symbols: | trehalose-6-phosphate phosphatase, putative | chr4:18449138-18451218 REVERSEhighly similar to ( 521) loc\_os02g51680 12002.m10199 protein expressed protein seq=cds; coord=5:208172385..208174899:1; parent\_gene=GRMZM2G055150'

'very weakly similar to (84.0) AT2G30140 | Symbols: | UDP-glucuronosyl/UDP-glucosyl transferase family protein | chr2:12872200-12873691 FORWARDweakly similar to ( 135) loc\_os10g12120 12010.m04526 protein UDP-glycosyltransferase/ transferase, transferring glycosyl groups, putative seq=cds; coord=5:208178465..208179815:1; parent\_gene=GRMZM2G055124'

'highly similar to ( 993) AT5G14880 | Symbols: | potassium transporter, putative | chr5:4814244-4817667 FORWARDnearly identical (1028) HAK10\_ORYSA Potassium transporter 10 (OsHAK10) - Oryza sativa (Rice)nearly identical (1248) loc\_os02g49760 12002.m33855 protein potassium transporter 8, putative, expressed seq=cds; coord=5:204821695..204826748:-1; parent\_gene=GRMZM2G375116'

'highly similar to ( 854) AT1G31480 | Symbols: SGR2 | SGR2 (SHOOT GRAVITROPISM 2); phospholipase A1 | chr1:11266225-11271527 FORWARDnearly identical (1211) loc\_os08g01920 12008.m04340 protein SGR2, putative, expressed seq=cds; coord=6:2895769..2912016:-1; parent\_gene=GRMZM2G023335'

'weakly similar to ( 130) loc\_os03g62379 12003.m11114 protein DNA binding protein, putative, expressed seq=cds; coord=6:6015317..6016569:1; parent\_gene=GRMZM2G019257'

'moderately similar to ( 484) AT3G04120 | Symbols: GAPC, GAPC-1, GAPC1 | GAPC1 (GLYCERALDEHYDE-3-PHOSPHATE DEHYDROGENASE C SUBUNIT 1); glyceraldehyde-3-phosphate dehydrogenase (phosphorylating)/ glyceraldehyde-3-phosphate dehydrogenase | chr3:1081077-1083131 FORWARDhighly similar to ( 557) G3PD\_MAIZE Glyceraldehyde-3-phosphate dehydrogenase, cytosolic 2 (EC 1.2.1.12) - Zea mays (Maize)highly similar to ( 519) loc\_os08g03290 12008.m26460 protein glyceraldehyde-3-phosphate dehydrogenase, cytosolic, putative, expressed seq=cds; coord=6:6898695..6903246:-1; parent\_gene=GRMZM2G180625'

'weakly similar to ( 132) AT4G20380 | Symbols: | zinc finger protein (LSD1) | chr4:11005027-11006438 FORWARDmoderately similar to ( 220) loc\_os08g03610 12008.m04505 protein LSD1, putative, expressed seq=cds; coord=6:8679614..8681295:-1; parent\_gene=GRMZM2G060057'

'weakly similar to ( 103) AT5G01380 | Symbols: | transcription factor | chr5:155784-157451 REVERSEweakly similar to ( 197) loc\_os05g03740 12005.m04908 protein transcription factor GT-3b, putative seq=cds; coord=6:25704008..25705812:-1; parent\_gene=GRMZM2G016637'

'highly similar to ( 667) AT5G15740 | Symbols: | unknown protein | chr5:5134788-5136956 REVERSEhighly similar to ( 758) loc\_os09g29940 12009.m06145 protein auxin-independent growth promoter, putative, expressed seq=cds; coord=7:130246697..130249893:-1; parent\_gene=GRMZM2G089854'

'weakly similar to ( 122) AT4G00180 | Symbols: YAB3 | YAB3 (YABBY3); protein binding / transcription factor | chr4:72804-74888 REVERSEweakly similar to ( 103) YAB1\_ORYSA Protein YABBY (OsYAB1) (Filamentous flower protein 1) - Oryza sativa (Rice)weakly similar to ( 115) loc\_os02g42950 12002.m33795 protein yabby15 protein, putative, expressed seq=cds; coord=7:159462826..159464816:1; parent\_gene=GRMZM2G046829'

'highly similar to ( 560) AT5G44240 | Symbols: | haloacid dehalogenase-like hydrolase family protein | chr5:17817619-17823598 FORWARDhighly similar to ( 662) loc\_os11g25980 12011.m06519 protein phospholipid-transporting ATPase 2, putative, expressed seq=cds; coord=7:161813482..161823445:-1; parent\_gene=GRMZM2G479163'

'highly similar to ( 610) AT5G44240 | Symbols: | haloacid dehalogenase-like hydrolase family protein | chr5:17817619-17823598 FORWARDhighly similar to ( 603) loc\_os1g25980 12011.m06519 protein phospholipid-transporting ATPase 2, putative, expressed seq=cds; coord=7:161834088..161851386:-1; parent\_gene=GRMZM2G411916'

'moderately similar to ( 317) AT3G53870 | Symbols: | 40S ribosomal protein S3 (RPS3B) | chr3:19951547-19952782 FORWARDmoderately similar to ( 339) loc\_os07g41750 12007.m29256 protein 40S ribosomal protein S3-A, putative, expressed seq=cds; coord=7:165012263..165014081:-1; parent\_gene=GRMZM2G093902'

'moderately similar to ( 255) AT1G70600 | Symbols: | structural constituent of ribosome | chr1:26621168-26621608 REVERSEmoderately similar to ( 280) loc\_os03g29460 12003.m08219 protein 60S ribosomal protein L27a-3, putative, expressed seq=cds; coord=7:165243551..165244574:-1; parent\_gene=GRMZM2G030731'

'moderately similar to ( 255) AT1G70600 | Symbols: | structural constituent of ribosome | chr1:26621168-26621608 REVERSEmoderately similar to ( 280) loc\_os03g29460 12003.m08219 protein 60S ribosomal protein L27a-3, putative, expressed seq=cds; coord=7:165243551..165244574:-1; parent\_gene=GRMZM2G030731'

'very weakly similar to (85.9) AT5G13910 | Symbols: LEP | LEP (LEAFY PETIOLE); DNA binding / transcription factor | chr5:4482450-4483085 REVERSEvery weakly similar to (91.3) loc\_os04g32790 12004.m08376 protein AP2 domain containing protein, expressed seq=cds; coord=7:165809813..165810646:-1; parent\_gene=GRMZM2G060876'

'weakly similar to ( 187) AT2G17730 | Symbols: | zinc finger (C3HC4-type RING finger) family protein | chr2:7704142-7705312 FORWARDmoderately similar to ( 202) loc\_os06g50370 12006.m09561 protein RING-H2 finger protein ATL2B, putative, expressed seq=cds; coord=7:175204235..175205552:1; parent\_gene=GRMZM2G440866'

'moderately similar to ( 334) AT1G31860 | Symbols: AT-IE, HISN2 | AT-IE; phosphoribosyl-AMP cyclohydrolase/ phosphoribosyl-ATP diphosphatase | chr1:11434250-11436530 REVERSEmoderately similar to ( 437) loc\_os01g16940 12001.m08290 protein histidine biosynthesis bifunctional protein hisIE, chloroplast precursor, putative, expressed seq=cds; coord=8:2110920..2115595:1; parent\_gene=GRMZM2G082214'

'weakly similar to ( 144) loc\_os07g07680 12007.m29080 protein hydroxyproline-rich glycoprotein, putative, expressed seq=cds; coord=8:4449649..4453055:-1; parent\_gene=GRMZM2G006734'

'moderately similar to ( 398) AT2G18700 | Symbols: ATTPS11, TPS11, ATTPSB | ATTPS11; transferase, transferring glycosyl groups | chr2:8109043-8111799 FORWARDhighly similar to ( 546) loc\_os02g54820 12002.m33906 protein trehalose-6-phosphate synthase, putative, expressed seq=cds; coord=8:5487619..5499781:1; parent\_gene=GRMZM2G416836'

'highly similar to ( 668) AT3G18080 | Symbols: BGLU44 | BGLU44 (B-S GLUCOSIDASE 44); (R)-amygdalin beta-glucosidase/ 4-methylumbelliferyl-beta-D-glucopyranoside beta-glucosidase/ beta-gentiobiose beta-glucosidase/ cellobiose glucosidase/ esculin beta-glucosidase/ hydrolase, hydrolyzing O-glycosyl compounds | chr3:6191586-6194124 FORWARDmoderately similar to ( 350) BGLC\_MAIZE Beta-glucosidase, chloroplast precursor (EC 3.2.1.21) (Gentiobiase) (Cellobiase) (Beta-D-glucoside glucohydrolase) - Zea mays (Maize)highly similar to ( 773) loc\_os01g32364 12001.m09560 protein non-cyanogenic beta-glucosidase precursor, putative, expressed seq=cds; coord=8:8302750..8305316:-1; parent\_gene=AC234160.1\_FG003'

'highly similar to ( 668) AT3G18080 | Symbols: BGLU44 | BGLU44 (B-S GLUCOSIDASE 44); (R)-amygdalin beta-glucosidase/ 4-methylumbelliferyl-beta-D-glucopyranoside beta-glucosidase/ beta-gentiobiose beta-glucosidase/ cellobiose glucosidase/ esculin beta-glucosidase/ hydrolase, hydrolyzing O-glycosyl compounds | chr3:6191586-6194124 FORWARDmoderately similar to ( 350) BGLC\_MAIZE Beta-glucosidase, chloroplast precursor (EC 3.2.1.21) (Gentiobiase) (Cellobiase) (Beta-D-glucoside glucohydrolase) - Zea mays (Maize)highly similar to ( 773) loc\_os01g32364 12001.m09560 protein non-cyanogenic beta-glucosidase precursor, putative, expressed seq=cds; coord=8:8302750..8305316:-1; parent\_gene=AC234160.1\_FG003'

'moderately similar to ( 226) AT3G14470 | Symbols: | disease resistance protein (NBS-LRR class), putative | chr3:4857940-4861104 FORWARDhighly similar to ( 738) loc\_os05g34230 12005.m07654 protein disease resistance protein RGA3, putative, expressed seq=cds; coord=8:104379532..104382273:1; parent\_gene=GRMZM2G017603'

'moderately similar to ( 369) AT4G15530 | Symbols: PPK | PPK (pyruvate orthophosphate dikinase); kinase/ pyruvate, phosphate dikinase | chr4:8864828-8870748 REVERSEmoderately similar to ( 416) PPK\_MAIZE Pyruvate, phosphate dikinase, chloroplast precursor (EC 2.7.9.1) (Pyruvate, orthophosphate dikinase) - Zea mays (Maize)moderately similar to ( 417) loc\_os05g33570 12005.m083718 protein pyruvate, phosphate dikinase, chloroplast precursor, putative, expressed seq=cds; coord=8:107012660..107014828:1; parent\_gene=GRMZM2G097457'

'moderately similar to ( 263) AT2G21520 | Symbols: | transporter | chr2:9215956-9218953 FORWARDmoderately similar to ( 446) loc\_os08g38850 12008.m26728 protein phosphatidylinositol transporter/ transporter, putative, expressed seq=cds; coord=8:109946142..109950400:-1; parent\_gene=GRMZM2G312198'

'moderately similar to ( 313) AT2G38470 | Symbols: WRKY33, ATWRKY33 | WRKY33; transcription factor | chr2:16108476-16110539 FORWARDmoderately similar to ( 484) loc\_os05g27730 12005.m07061 protein OsWRKY53 - Superfamily of rice TFs having WRKY and zinc finger domains, expressed seq=cds; coord=8:110214059..110216431:-1; parent\_gene=GRMZM2G449681'

'moderately similar to ( 295) AT1G21240 | Symbols: WAK3 | WAK3 (wall associated kinase 3); kinase/ protein serine/threonine kinase | chr1:7434303-7436702 FORWARDweakly similar to ( 177) CRI4\_MAIZE Putative receptor protein kinase CRINKLY4 precursor (EC 2.7.11.1) - Zea mays (Maize)moderately similar to ( 484) loc\_os08g39210 12008.m07902 protein OsWAK74 - OsWAK receptor-like protein kinase, expressed seq=cds; coord=8:112624757..112626912:1; parent\_gene=GRMZM2G061718'

'moderately similar to ( 310) AT2G40280 | Symbols: | dehydration-responsive family protein | chr2:16825707-16828300 REVERSEmoderately similar to ( 459) loc\_os05g39520 12005.m08130 protein ankyrin-like protein, putative, expressed seq=cds; coord=8:118529129..118653539:-1; parent\_gene=AC204277.3\_FG006'

'highly similar to ( 684) AT3G13390 | Symbols: sks11 | sks11 (SKU5 Similar 11); copper ion binding / oxidoreductase | chr3:4351401-4353289 REVERSEhighly similar to ( 686) NTP3\_TOBAC Pollen-specific protein NTP303 precursor - Nicotiana tabacum (Common tobacco)highly similar to ( 927) loc\_os05g40740 12005.m083761 protein pollen-specific protein NTP303 precursor, putative, expressed seq=cds; coord=8:119369178..119371841:-1; parent\_gene=GRMZM2G142584'

'moderately similar to ( 417) AT3G05510 | Symbols: | phospholipid/glycerol acyltransferase family protein | chr3:1596133-1598074 FORWARDhighly similar to ( 706) loc\_os01g70570 12001.m150833 protein acyltransferase, putative, expressed seq=cds; coord=8:159882828..159886413:1; parent\_gene=GRMZM2G002135'

'highly similar to ( 617) AT5G62000 | Symbols: ARF2, ARF1-BP, HSS | ARF2 (AUXIN RESPONSE FACTOR 2); protein binding / transcription factor | chr5:24910859-24914680 FORWARDnearly identical (1014) loc\_os01g70270 12001.m43358 protein auxin response factor 2, putative, expressed seq=cds; coord=8:160100153..160104047:-1; parent\_gene=GRMZM2G116557'

'moderately similar to ( 280) AT1G23280 | Symbols: | MAK16 protein-related | chr1:8260865-8262650 REVERSEmoderately similar to ( 362) loc\_os07g16950 12007.m079650 protein MAK16-like protein RBM13, putative, expressed seq=cds; coord=8:161187376..161192709:-1; parent\_gene=GRMZM2G461793'

'highly similar to ( 616) AT1G27320 | Symbols: AHK3 | AHK3 (ARABIDOPSIS HISTIDINE KINASE 3); cytokinin receptor/ osmosensor/ protein histidine kinase | chr1:9487780-9492027 FORWARDweakly similar to ( 113) ETR1\_PRUPE Ethylene receptor (EC 2.7.13.3) - Prunus persica (Peach)highly similar to ( 945) loc\_os01g69920 12001.m42798 protein histidine kinase 2, putative, expressed seq=cds; coord=8:161390595..161396494:1; parent\_gene=GRMZM2G423456'

'moderately similar to ( 360) AT5G16270 | Symbols: ATRAD21.3, SYN4 | SYN4 (SISTER CHROMATID COHESION 1 PROTEIN 4) | chr5:5316783-5322330 FORWARDnearly identical (1225) loc\_os01g67250 12001.m42786 protein N terminus of Rad21 / Rec8 like protein, expressed seq=cds; coord=8:164083362..164092361:1; parent\_gene=GRMZM2G421829'

'highly similar to ( 506) AT4G31820 | Symbols: ENP, NPY1, MAB4 | ENP (ENHANCER OF PINOID); protein binding / signal transducer | chr4:15390788-15393627 REVERSEmoderately similar to ( 317) NPH3\_ORYSA Coleoptile phototropism protein 1 (Non-phototropic hypocotyl 3-like protein) (NPH3-like protein) - Oryza sativa (Rice)highly similar to ( 843) loc\_os06g08550 12006.m05574 protein transposon protein, putative, Mutator sub-class, expressed seq=cds; coord=9:12791598..12796435:-1; parent\_gene=GRMZM2G067053'

'moderately similar to ( 419) AT4G25160 | Symbols: | protein kinase family protein | chr4:12903360-12906669 REVERSEweakly similar to ( 129) CRI4\_MAIZE Putative receptor protein kinase CRINKLY4 precursor (EC 2.7.11.1) - Zea mays (Maize)highly similar to ( 580) loc\_os06g04880 12006.m31972 protein ATP binding protein, putative, expressed seq=cds; coord=9:20824694..20826403:1; parent\_gene=GRMZM2G433433'

'weakly similar to ( 146) AT5G06710 | Symbols: HAT14 | HAT14 (HOMEODOMAIN FROM ARABIDOPSIS THALIANA); DNA binding / transcription factor | chr5:2069093-2070284 REVERSEweakly similar to ( 175) loc\_os06g04850 12006.m05214 protein homeobox-leucine zipper protein ATHB-4, putative, expressed seq=cds; coord=9:20869132..20870463:-1; parent\_gene=GRMZM2G106276'

'moderately similar to ( 395) AT4G36090 | Symbols: | oxidoreductase, 2OG-Fe(II) oxygenase family protein | chr4:17078376-17080670 REVERSEhighly similar to ( 731) loc\_os06g04660 12006.m091594 protein oxidoreductase, 2OG-Fe oxygenase family protein, expressed seq=cds; coord=9:21580594..21585837:-1; parent\_gene=GRMZM2G114098'

'weakly similar to ( 174) AT2G35540 | Symbols: | DNAJ heat shock N-terminal domain-containing protein | chr2:14927158-14928930 FORWARDmoderately similar to ( 415) loc\_os06g02170 12006.m091578 protein heat shock protein binding protein, putative, expressed seq=cds; coord=9:26548872..26550670:1; parent\_gene=GRMZM2G152373'

'moderately similar to ( 482) AT3G30390 | Symbols: | amino acid transporter family protein | chr3:11977112-11978827 REVERSEhighly similar to ( 628) loc\_os06g16420 12006.m32253 protein amino acid transporter-like protein, putative, expressed seq=cds; coord=9:34842506..34845871:1; parent\_gene=GRMZM2G150406'

'moderately similar to ( 205) AT1G65680 | Symbols: ATEXPB2, EXPB2, ATHEXP BETA 1.4 | ATEXPB2 (ARABIDOPSIS THALIANA EXPANSIN B2) | chr1:24427266-24428399 FORWARDmoderately similar to ( 373) EXPB3\_ORYSA Expansin-B3 precursor (OsEXPB3) (Beta-expansin-3) (OsaEXPb1.10) - Oryza sativa (Rice)moderately similar to ( 373) loc\_os10g40720 12010.m06840 protein beta-expansin 1a precursor, putative, expressed seq=cds; coord=9:116749793..116751376:1; parent\_gene=GRMZM2G094990'

'highly similar to ( 859) AT1G78000 | Symbols: SULTR1;2, SEL1 | SULTR1;2 (SULFATE TRANSPORTER 1;2); sulfate transmembrane transporter | chr1:29329889-29332877 FORWARDmoderately similar to ( 370) NO70\_SOYBN Early nodulin 70 - Glycine max (Soybean)nearly identical (1032) loc\_os03g09970 12003.m101107 protein sulfate transporter 1.2, putative, expressed seq=cds; coord=9:148914087..148917604:-1; parent\_gene=GRMZM2G342907'

'highly similar to ( 512) AT5G48150 | Symbols: PAT1 | PAT1 (phytochrome a signal transduction 1); signal transducer/ transcription factor | chr5:19522497-19524053 REVERSEhighly similar to ( 537) CIGR2\_ORYSA Chitin-inducible gibberellin-responsive protein 2 - Oryza sativa (Rice)highly similar to ( 796) loc\_os03g09280 12003.m101225 protein chitin-inducible gibberellin-responsive protein 2, putative, expressed seq=cds; coord=9:149164041..149170542:-1; parent\_gene=GRMZM2G028039'

'very weakly similar to (84.0) AT3G28857 | Symbols: | transcription regulator | chr3:10855781-10856313 REVERSEweakly similar to ( 117) loc\_os03g07540 12003.m06267 protein DNA binding protein, putative, expressed seq=cds; coord=9:151129408..151129907:-1; parent\_gene=AC149829.2\_FG004'

'very weakly similar to ( 100) AT5G01880 | Symbols: | zinc finger (C3HC4-type RING finger) family protein | chr5:339017-339496 FORWARDvery weakly similar to (87.8) EL5\_ORYSA E3 ubiquitin-protein ligase EL5 (EC 6.3.2.-) - Oryza sativa (Rice)weakly similar to ( 102) loc\_os12g02350 12012.m04236 protein RING-H2 finger protein ATL5A, putative, expressed seq=cds; coord=10:4098565..4099212:-1; parent\_gene=GRMZM2G467576'

'weakly similar to ( 138) AT3G58630 | Symbols: | transcription factor | chr3:21683928-21685771 REVERSEmoderately similar to ( 338) loc\_os04g36790 12004.m08719 protein 6b-interacting protein 1, putative, expressed seq=cds; coord=10:119916059..119917843:-1; parent\_gene=GRMZM2G392168'

'moderately similar to ( 251) AT3G52390 | Symbols: | tatD-related deoxyribonuclease family protein | chr3:19423105-19425183 REVERSEmoderately similar to ( 280) loc\_os07g06440 12007.m05105 protein deoxyribonuclease tatD, putative, expressed seq=cds; coord=10:137622400..137640740:-1; parent\_gene=GRMZM2G455171'

'weakly similar to ( 129) AT2G38250 | Symbols: | DNA-binding protein-related | chr2:16018384-16019500 FORWARDmoderately similar to ( 325) loc\_os04g51320 12004.m10028 protein transcription factor GT-3b, putative, expressed seq=cds; coord=10:141020599..141023637:-1; parent\_gene=GRMZM2G415229'

'moderately similar to ( 218) AT2G26280 | Symbols: CID7 | CID7; ATP binding / damaged DNA binding / protein binding | chr2:11188143-11190579 REVERSEhighly similar to ( 762) loc\_os03g08270 12003.m101105 protein ataxin-2 C-terminal region family protein, expressed seq=cds; coord=1:16595443..16603430:1; parent\_gene=GRMZM2G017254'

'highly similar to ( 556) AT1G19250 | Symbols: FMO1 | FMO1 (FLAVIN-DEPENDENT MONOOXYGENASE 1); FAD binding / NADP or NADPH binding / electron carrier/ flavin-containing monooxygenase/ monooxygenase/ oxidoreductase | chr1:6650656-6653053 REVERSEhighly similar to ( 833) loc\_os03g08410 12003.m06349 protein monooxygenase/ oxidoreductase, putative, expressed seq=cds; coord=1:17015718..17018487:1; parent\_gene=GRMZM2G000427'

'moderately similar to ( 206) AT4G33250 | Symbols: EIF3K, TIF3K1, ATTIF3K1 | EIF3K (EUKARYOTIC TRANSLATION INITIATION FACTOR 3K); translation initiation factor | chr4:16039066-16040617 REVERSEmoderately similar to ( 241) IF3C\_ORYSA Eukaryotic translation initiation factor 3 subunit 12 (eIF-3 p25) (eIF3k) - Oryza sativa (Rice)moderately similar to ( 241) loc\_os03g08450 12003.m06353 protein eukaryotic translation initiation factor 3 subunit 12, putative, expressed seq=cds; coord=1:17408930..17412458:-1; parent\_gene=GRMZM2G115182'

'weakly similar to ( 152) AT3G59650 | Symbols: | mitochondrial ribosomal protein L51/S25/CI-B8 family protein | chr3:22033216-22033928 FORWARDweakly similar to ( 182) loc\_os03g10930 12003.m06545 protein mitochondrial ribosomal protein L43, putative, expressed seq=cds; coord=1:21456899..21461749:1; parent\_gene=GRMZM2G004259'

'moderately similar to ( 229) AT4G37580 | Symbols: HLS1, COP3, UNS2 | HLS1 (HOOKLESS 1); N-acetyltransferase | chr4:17658932-17660564 FORWARDmoderately similar to ( 366) loc\_os03g10810 12003.m35083 protein HLS1, putative, expressed seq=cds; coord=1:21720856..21722289:1; parent\_gene=GRMZM2G114184'

'highly similar to ( 545) AT2G14820 | Symbols: NPY2 | NPY2 (NAKED PINS IN YUC MUTANTS 2); protein binding / signal transducer | chr2:6358864-6361300 FORWARDmoderately similar to ( 320) NPH3\_ORYSA Coleoptile phototropism protein 1 (Non-phototropic hypocotyl 3-like protein) (NPH3-like protein) - Oryza sativa (Rice)highly similar to ( 942) loc\_os03g10800 12003.m34805 protein transposon protein, putative, Mutator sub-class, expressed seq=cds; coord=1:21757362..21776523:-1; parent\_gene=GRMZM2G114055'

'moderately similar to ( 248) AT2G30260 | Symbols: U2B" | U2B" (U2 small nuclear ribonucleoprotein B); RNA binding / nucleic acid binding / nucleotide binding | chr2:12905557-12907434 REVERSEmoderately similar to ( 323) loc\_os03g18720 12003.m35175 protein spliceosomal protein, putative, expressed seq=cds; coord=1:46622335..46627171:-1; parent\_gene=GRMZM2G153450'



'moderately similar to ( 248) AT2G30260 | Symbols: U2B" | U2B" (U2 small nuclear ribonucleoprotein B); RNA binding / nucleic acid binding / nucleotide binding | chr2:12905557-12907434 REVERSEmoderately similar to ( 323) loc\_os03g18720 12003.m35175 protein spliceosomal protein, putative, expressed seq=cds; coord=1:46622335..46627171:-1; parent\_gene=GRMZM2G153450'

'highly similar to ( 853) AT3G16910 | Symbols: AAE7, ACN1 | AAE7 (ACYL-ACTIVATING ENZYME 7); AMP binding / acetate-CoA ligase | chr3:5773231-5775411 REVERSEweakly similar to ( 139) 4CL1\_SOLTU 4-coumarate--CoA ligase 1 (EC 6.2.1.12) (4CL 1) (4-coumaroyl-CoA synthase 1) - Solanum tuberosum (Potato)nearly identical (1050) loc\_os03g19240 12003.m07341 protein AMP-binding protein, putative, expressed seq=cds; coord=1:48684987..48690042:-1; parent\_gene=GRMZM2G013783'

'highly similar to ( 691) AT1G56560 | Symbols: | beta-fructofuranosidase, putative / invertase, putative / saccharase, putative / beta-fructosidase, putative | chr1:21192593-21194948 FORWARDhighly similar to ( 795) loc\_os03g20020 12003.m07415 protein beta-fructofuranosidase, putative, expressed seq=cds; coord=1:51318993..51329214:-1; parent\_gene=GRMZM2G084940'

'moderately similar to ( 263) AT5G49620 | Symbols: AtMYB78 | AtMYB78 (myb domain protein 78); DNA binding / transcription factor | chr5:20137491-20139384 REVERSEweakly similar to ( 164) MYBA2\_ORYSA Myb-related protein MYBAS2 - Oryza sativa (Rice)moderately similar to ( 343) loc\_os03g20090 12003.m101325 protein MYB transcription factor, putative, expressed seq=cds; coord=1:51397954..51400225:-1; parent\_gene=GRMZM2G070849'

'moderately similar to ( 286) AT4G16640 | Symbols: | matrix metalloproteinase, putative | chr4:9367396-9368490 REVERSEmoderately similar to ( 209) MEP1\_SOYBN Metalloendoproteinase 1 precursor (EC 3.4.24.-) (SMEP1) - Glycine max (Soybean)moderately similar to ( 441) loc\_os10g40830 12010.m06853 protein metalloendoproteinase 1 precursor, putative, expressed seq=cds; coord=1:90788877..90790064:1; parent\_gene=GRMZM2G317386'

'moderately similar to ( 213) AT5G23290 | Symbols: PDF5 | PDF5 (PREFOLDIN 5); unfolded protein binding | chr5:7846144-7847428 FORWARDmoderately similar to ( 258) loc\_os10g34670 12010.m22005 protein prefoldin subunit 5, putative, expressed seq=cds; coord=1:229567215..229571434:1; parent\_gene=GRMZM2G014676'

'moderately similar to ( 214) AT1G73230 | Symbols: | nascent polypeptide-associated complex (NAC) domain-containing protein | chr1:27540506-27541364 REVERSEmoderately similar to ( 235) loc\_os10g34180 12010.m21923 protein transcription factor BTF3, putative, expressed seq=cds; coord=1:230179502..230183279:1; parent\_gene=GRMZM2G131577'

'highly similar to ( 608) AT5G03760 | Symbols: ATCSLA09, CSLA09, ATCSLA9, CSLA9, RAT4 | ATCSLA09; mannan synthase/ transferase, transferring glycosyl groups | chr5:985910-990087 REVERSEhighly similar to ( 780) loc\_os10g26630 12010.m65488 protein CSLA2 - cellulose synthase-like family A; mannan synthase, expressed seq=cds; coord=1:242575182..242581195:-1; parent\_gene=GRMZM2G115772'

'moderately similar to ( 212) AT2G32460 | Symbols: MYB101, ATMYB101, ATM1 | MYB101; DNA binding / transcription factor | chr2:13782419-13784359 REVERSEmoderately similar to ( 207) GAM1\_ORYSA Transcription factor GAMYB (OsGAMyb) - Oryza sativa (Rice)moderately similar to ( 341) loc\_os03g38210 12003.m08921 protein myb-like DNA-binding domain containing protein, expressed seq=cds; coord=1:246031095..246033561:1; parent\_gene=AC217264.3\_FG005'

'moderately similar to ( 212) AT2G32460 | Symbols: MYB101, ATMYB101, ATM1 | MYB101; DNA binding / transcription factor | chr2:13782419-13784359 REVERSEmoderately similar to ( 207) GAM1\_ORYSA Transcription factor GAMYB (OsGAMYb) - Oryza sativa (Rice)moderately similar to ( 341) loc\_os03g38210 12003.m08921 protein myb-like DNA-binding domain containing protein, expressed seq=cds; coord=1:246031095..246033561:1; parent\_gene=AC217264.3\_FG005'

'moderately similar to ( 341) AT4G34380 | Symbols: | transducin family protein / WD-40 repeat family protein | chr4:16438835-16440322 FORWARDmoderately similar to ( 479) loc\_os03g42710 12003.m09323 protein nucleotide binding protein, putative seq=cds; coord=1:253911424..253913528:-1; parent\_gene=GRMZM2G099023'

'moderately similar to ( 272) AT3G18400 | Symbols: anac058 | anac058 (Arabidopsis NAC domain containing protein 58); transcription factor | chr3:6318745-6320593 REVERSEmoderately similar to ( 209) NAC77\_ORYSA NAC domain-containing protein 77 (ONAC077) (ONAC300) - Oryza sativa (Rice)moderately similar to ( 349) loc\_os03g42630 12003.m09316 protein GRAB2 protein, putative, expressed seq=cds; coord=1:254075089..254076572:1; parent\_gene=GRMZM2G031120'

'moderately similar to ( 229) loc\_os03g42370 12003.m09294 protein B3 DNA binding domain containing protein seq=cds; coord=1:254400478..254402593:1; parent\_gene=GRMZM2G098063'

'highly similar to ( 883) AT1G23090 | Symbols: AST91, SULTR3;3 | AST91 (SULFATE TRANSPORTER 91); sulfate transmembrane transporter | chr1:8185238-8188954 REVERSEmoderately similar to ( 348) NO70\_SOYBN Early nodulin 70 - Glycine max (Soybean)nearly identical (1099) loc\_os04g55800 12004.m10471 protein sulfate transporter 3.3, putative, expressed seq=cds; coord=2:4890135..4895146:1; parent\_gene=GRMZM2G395114'

'weakly similar to ( 101) AT5G67190 | Symbols: | AP2 domain-containing transcription factor, putative | chr5:26809135-26809689 REVERSEweakly similar to ( 168) loc\_os04g55520 12004.m10443 protein dehydration responsive element binding protein, putative, expressed seq=cds; coord=2:5562976..5564647:1; parent\_gene=GRMZM2G174917'

'very weakly similar to (81.6) AT2G42160 | Symbols: | zinc finger (ubiquitin-hydrolase) domain-containing protein | chr2:17574843-17577397 REVERSEweakly similar to ( 134) loc\_os04g55480 12004.m35484 protein BRCA1-associated protein, putative, expressed seq=cds; coord=2:5765904..5767125:1; parent\_gene=GRMZM2G066169'

'weakly similar to ( 159) AT5G23350 | Symbols: | GRAM domain-containing protein / ABA-responsive protein-related | chr5:7858545-7859387 REVERSEmoderately similar to ( 290) loc\_os04g44510 12004.m09410 protein FIP1, putative, expressed seq=cds; coord=2:26726276..26727564:1; parent\_gene=GRMZM2G114153'

'moderately similar to ( 285) AT2G28305 | Symbols: | unknown protein | chr2:12081186-12084307 FORWARDmoderately similar to ( 317) loc\_os04g43840 12004.m09343 protein carboxy-lyase, putative, expressed seq=cds; coord=2:28002262..28006292:-1; parent\_gene=GRMZM2G471931'

'weakly similar to ( 171) ATMG01275 | Symbols: NAD1A, NAD1, ND1 | Encodes subunit of mitochondrial NAD(P)H dehydrogenase that is trans-spliced from three precursors, NAD1A, NAD1B, and NAD1C. | chrM:318004-318390 REVERSEweakly similar to ( 181) NU1M\_OENBE NADH-ubiquinone oxidoreductase chain 1 (EC 1.6.5.3) (NADH dehydrogenase subunit 1) - *Oenothera bertiana* (Bertero's evening primrose) seq=cds; coord=9:68016311..68020591:1; parent\_gene=GRMZM2G141605'

'moderately similar to ( 255) AT3G54420 | Symbols: ATEP3, ATCHITIV, CHIV | ATEP3; chitinase | chr3:20145935-20147034 FORWARDmoderately similar to ( 295) CHIA\_MAIZE Endochitinase A precursor (EC 3.2.1.14) (Seed chitinase A) - *Zea mays* (Maize)moderately similar to ( 303) loc\_os04g41680 12004.m09144 protein endochitinase A precursor, putative, expressed seq=cds; coord=2:33537139..33539360:1; parent\_gene=GRMZM2G052175'

'moderately similar to ( 343) AT3G59350 | Symbols: | serine/threonine protein kinase, putative | chr3:21932930-21934883 FORWARDweakly similar to ( 183) CRI4\_MAIZE Putative receptor protein kinase CRINKLY4 precursor (EC 2.7.11.1) - *Zea mays* (Maize)highly similar to ( 545) loc\_os04g41310 12004.m09110 protein expressed protein seq=cds; coord=2:34537876..34541534:-1; parent\_gene=GRMZM2G051984'

'moderately similar to ( 312) AT1G08110 | Symbols: | lactoylglutathione lyase, putative / glyoxalase I, putative | chr1:2535463-2537630 FORWARDmoderately similar to ( 314) LGUL\_CICAR Lactoylglutathione lyase (EC 4.4.1.5) (Methylglyoxalase) (Aldoketomutase) (Glyoxalase I) (Glx I) (Ketone-aldehyde mutase) (S-D-lactoylglutathione methylglyoxal lyase) - *Cicer arietinum* (Chickpea) (Garbanzo)moderately similar to ( 363) loc\_os05g22970 12005.m06592 protein lactoylglutathione lyase, putative, expressed seq=cds; coord=2:82246568..82258715:1; parent\_gene=GRMZM2G125310'

'moderately similar to ( 238) AT5G47850 | Symbols: CCR4 | CCR4 (ARABIDOPSIS THALIANA CRINKLY4 RELATED 4); kinase | chr5:19378803-19381058 REVERSEweakly similar to ( 194) CRI4\_MAIZE Putative receptor protein kinase CRINKLY4 precursor (EC 2.7.11.1) - *Zea mays* (Maize)highly similar to ( 852) loc\_os11g11490 12011.m05341 protein protein kinase, putative, expressed seq=cds; coord=2:127824056..127827013:1; parent\_gene=GRMZM2G301355'

'moderately similar to ( 238) AT5G47850 | Symbols: CCR4 | CCR4 (ARABIDOPSIS THALIANA CRINKLY4 RELATED 4); kinase | chr5:19378803-19381058 REVERSEweakly similar to ( 194) CRI4\_MAIZE Putative receptor protein kinase CRINKLY4 precursor (EC 2.7.11.1) - *Zea mays* (Maize)highly similar to ( 852) loc\_os11g11490 12011.m05341 protein protein kinase, putative, expressed seq=cds; coord=2:127824056..127827013:1; parent\_gene=GRMZM2G301355'

'moderately similar to ( 244) AT5G53190 | Symbols: | nodulin MtN3 family protein | chr5:21572417-21574284 REVERSEmoderately similar to ( 321) loc\_os01g12130 12001.m07828 protein mtN3 protein-like, putative, expressed seq=cds; coord=3:2956021..2957784:1; parent\_gene=GRMZM2G060974'

'weakly similar to ( 127) AT1G15860 | Symbols: | INVOLVED IN: biological\_process unknown; EXPRESSED IN: 23 plant structures; EXPRESSED DURING: 13 growth stages; CONTAINS InterPro DOMAIN/s: Defective in cullin neddylation (InterPro:IPR014764), Protein of unknown function DUF298 (InterPro:IPR005176); BEST Arabidopsis thaliana protein match is: unknown protein (TAIR:AT3G12760.1). | chr1:5455055-5456741 FORWARDweakly similar to ( 154) loc\_os08g34070 12008.m07396 protein DCN1-like protein 4, putative, expressed seq=cds; coord=3:3234584..3239066:-1; parent\_gene=GRMZM2G001566'

'moderately similar to ( 391) AT1G06240 | Symbols: | unknown protein | chr1:1911166-1912875 FORWARDhighly similar to ( 569) loc\_os01g11590 12001.m42918 protein expressed protein seq=cds; coord=3:3448711..3456996:-1; parent\_gene=GRMZM2G400907'

'highly similar to ( 822) AT1G15460 | Symbols: ATBOR4, BOR4 | BOR4 (REQUIRES HIGH BORON 4); anion exchanger | chr1:5310196-5313376 REVERSEearly identical (1013) loc\_os01g08020 12001.m07427 protein boron transporter-like protein 2, putative, expressed seq=cds; coord=3:10934126..10940345:-1; parent\_gene=GRMZM2G051753'

'highly similar to ( 659) AT2G26710 | Symbols: BAS1, CYP734A1, CYP72B1 | BAS1 (PHYB ACTIVATION TAGGED SUPPRESSOR 1); oxygen binding / steroid hydroxylase | chr2:11380700-11383413 FORWARDmoderately similar to ( 372) C72A1\_CATRO Cytochrome P450 72A1 (EC 1.3.3.9) (CYPLXXII) (Secologanin synthase) (SLS) - Catharanthus roseus (Rosy periwinkle) (Madagascar periwinkle)highly similar to ( 836) loc\_os01g29150 12001.m09352 protein cytochrome P450 72A1, putative, expressed seq=cds; coord=3:11212000..11215671:1; parent\_gene=GRMZM2G138750'

'moderately similar to ( 468) AT1G06890 | Symbols: | transporter-related | chr1:2111728-2114038 REVERSEhighly similar to ( 557) loc\_os01g07310 12001.m43446 protein integral membrane protein like, putative, expressed seq=cds; coord=3:13589786..13593160:1; parent\_gene=GRMZM2G116053'

'moderately similar to ( 383) AT3G05840 | Symbols: ATSK12 | ATSK12; protein kinase/ protein serine/threonine kinase | chr3:1740793-1742927 FORWARDmoderately similar to ( 384) MSK3\_MEDSA Glycogen synthase kinase-3 homolog MsK-3 (EC 2.7.11.1) - Medicago sativa (Alfalfa)moderately similar to ( 410) loc\_os01g14860 12001.m43459 protein glycogen synthase kinase-3 homolog MsK-3, putative, expressed seq=cds; coord=3:13917982..13919834:-1; parent\_gene=GRMZM2G129482'

'moderately similar to ( 383) AT3G05840 | Symbols: ATSK12 | ATSK12; protein kinase/ protein serine/threonine kinase | chr3:1740793-1742927 FORWARDmoderately similar to ( 384) MSK3\_MEDSA Glycogen synthase kinase-3 homolog MsK-3 (EC 2.7.11.1) - Medicago sativa (Alfalfa)moderately similar to ( 410) loc\_os01g14860 12001.m43459 protein glycogen synthase kinase-3 homolog MsK-3, putative, expressed seq=cds; coord=3:13917982..13919834:-1; parent\_gene=GRMZM2G129482'

'moderately similar to ( 388) AT1G45616 | Symbols: AtRLP6 | AtRLP6 (Receptor Like Protein 6); protein binding | chr1:17183550-17186534 REVERSEmoderately similar to ( 207) PSKR\_DAUCA Phytosulfokine receptor precursor (EC 2.7.11.1) (Phytosulfokine LRR receptor kinase) - Daucus carota (Carrot)nearly identical (1443) loc\_os04g28210 12004.m07938 protein verticillium wilt disease resistance protein, putative, expressed seq=cds; coord=3:14685361..14688745:1; parent\_gene=GRMZM2G062576'

'highly similar to ( 564) loc\_os01g05660 12001.m150482 protein expressed protein seq=cds; coord=3:17580074..17584970:1; parent\_gene=GRMZM2G166064'

'moderately similar to ( 339) AT1G67000 | Symbols: | ATP binding / kinase/ protein kinase/ protein serine/threonine kinase | chr1:25004217-25007604 REVERSEweakly similar to ( 183) KPRO\_MAIZE Putative receptor protein kinase ZmPK1 precursor (EC 2.7.11.1) - Zea mays (Maize)highly similar to ( 800) loc\_os01g04580 12001.m07093 protein Ser/Thr protein kinase, putative, expressed seq=cds; coord=3:19965649..19969019:-1; parent\_gene=GRMZM2G467671'

'moderately similar to ( 343) AT1G66910 | Symbols: | protein kinase, putative | chr1:24961634-24963941  
REVERSEweakly similar to ( 196) KPRO\_MAIZE Putative receptor protein kinase ZmPK1 precursor (EC 2.7.11.1) -  
Zea mays (Maize)highly similar to ( 572) loc\_os01g04570 12001.m42597 protein Ser/Thr protein kinase, putative,  
expressed seq=cds; coord=3:20173885..20177370:-1; parent\_gene=GRMZM2G412760'

'moderately similar to ( 297) AT1G17020 | Symbols: SRG1, ATSRG1 | SRG1 (SENESCENCE-RELATED GENE 1);  
oxidoreductase, acting on diphenols and related substances as donors, oxygen as acceptor / oxidoreductase, acting on  
paired donors, with incorporation or reduction of molecular oxygen, 2-oxoglutarate as one donor, and inc |  
chr1:5820258-5821741 FORWARDweakly similar to ( 195) FLS\_PETHY Flavonol synthase/flavanone 3-hydroxylase  
(EC 1.14.11.23) (EC 1.14.11.9) (FLS) - Petunia hybrida (Petunia)moderately similar to ( 468) loc\_os10g40880  
12010.m06856 protein flavonol synthase/flavanone 3-hydroxylase, putative, expressed seq=cds;  
coord=3:52450288..52452458:-1; parent\_gene=GRMZM2G363893'

'moderately similar to ( 219) AT2G47460 | Symbols: MYB12, ATMYB12, PFG1 | MYB12 (MYB DOMAIN  
PROTEIN 12); DNA binding / transcription activator/ transcription factor | chr2:19476438-19479242  
FORWARDmoderately similar to ( 232) MYBP\_MAIZE Myb-related protein P - Zea mays (Maize)moderately similar  
to ( 258) loc\_os01g19970 12001.m08532 protein myb-like transcription factor, putative, expressed seq=cds;  
coord=3:54469147..54472943:1; parent\_gene=GRMZM2G051256'

'very weakly similar to (94.0) AT2G35910 | Symbols: | zinc finger (C3HC4-type RING finger) family protein |  
chr2:15073225-15073878 REVERSEweakly similar to ( 108) loc\_os12g42540 12012.m08033 protein RING-H2  
finger protein ATL2I, putative seq=cds; coord=3:88527498..88527953:1; parent\_gene=AC206768.3\_FG005'

'moderately similar to ( 292) AT3G56310 | Symbols: | alpha-galactosidase, putative / melibiase, putative / alpha-D-  
galactoside galactohydrolase, putative | chr3:20882886-20885745 FORWARDmoderately similar to ( 231)  
AGAL\_ORYSA Alpha-galactosidase precursor (EC 3.2.1.22) (Melibiase) (Alpha-D-galactoside galactohydrolase) -  
Oryza sativa (Rice)moderately similar to ( 359) loc\_os07g48160 12007.m09030 protein alpha-galactosidase precursor,  
putative, expressed seq=cds; coord=3:140682835..140687208:-1; parent\_gene=GRMZM2G402368'

'moderately similar to ( 255) AT4G38620 | Symbols: ATMYB4, MYB4 | MYB4; DNA binding / transcription factor |  
chr4:18053866-18054876 FORWARDmoderately similar to ( 263) MYB38\_MAIZE Myb-related protein Zm38 - Zea  
mays (Maize)moderately similar to ( 356) loc\_os01g65370 12001.m12650 protein transcription repressor MYB4,  
putative seq=cds; coord=3:173520271..173521619:-1; parent\_gene=GRMZM2G160838'

'highly similar to ( 569) AT2G16570 | Symbols: ATASE, ATASE1 | ATASE1 (GLN PHOSPHORIBOSYL  
PYROPHOSPHATE AMIDOTRANSFERASE 1); amidophosphoribosyltransferase | chr2:7180424-7182124  
REVERSEhighly similar to ( 562) PUR1\_SOYBN Amidophosphoribosyltransferase, chloroplast precursor (EC  
2.4.2.14) (Glutamine phosphoribosylpyrophosphate amidotransferase) (ATASE) (GPAT) - Glycine max  
(Soybean)highly similar to ( 800) loc\_os01g65260 12001.m12639 protein amidophosphoribosyltransferase,  
chloroplast precursor, putative, expressed seq=cds; coord=3:173801386..173803474:1;  
parent\_gene=GRMZM2G339699'

'very weakly similar to (94.4) loc\_os01g24950 12001.m150578 protein exocyst complex subunit Sec15-like family  
protein, expressed seq=cds; coord=3:175323602..175324361:-1; parent\_gene=GRMZM2G439532'

'highly similar to ( 617) AT1G62430 | Symbols: ATCDS1 | ATCDS1; phosphatidate cytidyltransferase | chr1:23106274-23108923 REVERSEhighly similar to ( 637) CDS1\_SOLTU Phosphatidate cytidyltransferase (EC 2.7.7.41) (CDP-diglyceride synthetase) (CDP-diglyceride pyrophosphorylase) (CDP-diacylglycerol synthase) (CDS) (CTP:phosphatidate cytidyltransferase) (CDP-DAG synthase) (CDP-DG synthetase) - Solahighly similar to ( 761) loc\_os01g55360 12001.m43197 protein phosphatidate cytidyltransferase, putative, expressed seq=cds; coord=3:195881870..195897637:1; parent\_gene=GRMZM2G452529'

'weakly similar to ( 193) AT5G11480 | Symbols: | GTP binding | chr5:3669350-3671471 REVERSEmoderately similar to ( 255) loc\_os01g53150 12001.m43175 protein GTP-binding protein, putative, expressed seq=cds; coord=3:200701564..200707398:-1; parent\_gene=GRMZM2G022625'

'moderately similar to ( 439) AT2G37650 | Symbols: | scarecrow-like transcription factor 9 (SCL9) | chr2:15792623-15794779 FORWARDweakly similar to ( 199) CIGR2\_ORYSA Chitin-inducible gibberellin-responsive protein 2 - Oryza sativa (Rice)highly similar to ( 771) loc\_os11g47870 12011.m08584 protein chitin-inducible gibberellin-responsive protein 2, putative, expressed seq=cds; coord=4:843149..845669:-1; parent\_gene=GRMZM2G163427'

'nearly identical (1818) AT1G15520 | Symbols: PDR12, ATPDR12 | PDR12 (PLEIOTROPIC DRUG RESISTANCE 12); ATPase, coupled to transmembrane movement of substances | chr1:5331993-5338175 REVERSEnearly identical (2339) PDR7\_ORYSA Putative pleiotropic drug resistance protein 7 - Oryza sativa (Rice)nearly identical (2339) loc\_os02g11760 12002.m06425 protein PDR5-like ABC transporter, putative, expressed seq=cds; coord=4:5786645..5793503:1; parent\_gene=GRMZM2G421495'

'weakly similar to ( 128) AT3G07040 | Symbols: RPM1, RPS3 | RPM1 (RESISTANCE TO P. SYRINGAE PV MACULICOLA 1); nucleotide binding / protein binding | chr3:2226244-2229024 REVERSEmoderately similar to ( 339) loc\_os02g19890 12002.m100181 protein stripe rust resistance protein Yr10, putative, expressed seq=cds; coord=4:42260480..42262502:-1; parent\_gene=GRMZM2G304049'

'moderately similar to ( 261) AT1G47480 | Symbols: | hydrolase | chr1:17417623-17419296 FORWARDweakly similar to ( 126) GID1\_ORYSA Gibberellin receptor GID1 (EC 3.-.-) (Gibberellin-insensitive dwarf protein 1) (Protein GIBBERELLIN INSENSITIVE DWARF1) - Oryza sativa (Rice)highly similar to ( 550) loc\_os08g37060 12008.m07693 protein gibberellin receptor GID1L2, putative, expressed seq=cds; coord=4:89515292..89516903:-1; parent\_gene=GRMZM2G064193'

'weakly similar to ( 139) AT1G23220 | Symbols: | dynein light chain type 1 family protein | chr1:8242614-8244136 FORWARDweakly similar to ( 190) loc\_os02g36990 12002.m08787 protein microtubule motor, putative, expressed seq=cds; coord=4:126474274..126476909:-1; parent\_gene=GRMZM2G145027'

'moderately similar to ( 498) AT2G15620 | Symbols: NIR1, NIR, ATHNIR | NIR1 (NITRITE REDUCTASE 1); ferredoxin-nitrate reductase/ nitrite reductase (NO-forming) | chr2:6810552-6812666 FORWARDhighly similar to ( 641) NIR\_MAIZE Ferredoxin--nitrite reductase, chloroplast precursor (EC 1.7.7.1) (Fragment) - Zea mays (Maize)highly similar to ( 566) loc\_os01g25484 12001.m43466 protein ferredoxin--nitrite reductase, chloroplast precursor, putative, expressed seq=cds; coord=4:178582502..178585778:1; parent\_gene=GRMZM2G079381'

'highly similar to ( 570) AT3G51850 | Symbols: CPK13 | CPK13; ATP binding / calcium ion binding / calmodulin-dependent protein kinase/ kinase/ protein kinase/ protein serine/threonine kinase/ protein tyrosine kinase | chr3:19232667-19235526 FORWARDmoderately similar to ( 452) CDPK\_SOYBN Calcium-dependent protein kinase SK5 (EC 2.7.11.1) (CDPK) - Glycine max (Soybean)highly similar to ( 830) loc\_os08g42750 12008.m08253 protein calcium-dependent protein kinase, isoform AK1, putative, expressed seq=cds; coord=4:194112157..194114320:-1; parent\_gene=GRMZM2G332660'

'moderately similar to ( 416) AT1G17240 | Symbols: AtRLP2 | AtRLP2 (Receptor Like Protein 2); protein binding / protein kinase | chr1:5896528-5898717 REVERSEmoderately similar to ( 353) PSKR\_DAUCA Phytosulfokine receptor precursor (EC 2.7.11.1) (Phytosulfokine LRR receptor kinase) - Daucus carota (Carrot)highly similar to ( 738) loc\_os02g06070 12002.m05955 protein phytosulfokine receptor precursor, putative seq=cds; coord=4:236965967..236968129:1; parent\_gene=GRMZM2G410963'

'weakly similar to ( 145) AT5G02560 | Symbols: HTA12 | HTA12; DNA binding | chr5:575437-576456 FORWARDweakly similar to ( 156) H2A1\_MEDTR Probable histone H2A.1 - Medicago truncatula (Barrel medic)weakly similar to ( 154) loc\_os03g17100 12003.m07141 protein histone H2A, putative, expressed seq=cds; coord=5:937749..938605:1; parent\_gene=GRMZM2G028955'

'moderately similar to ( 408) AT3G02875 | Symbols: ILR1 | ILR1 (IAA-LEUCINE RESISTANT 1); IAA-Leu conjugat hydrolase/ IAA-Phe conjugate hydrolase/ metallopeptidase | chr3:631993-633859 FORWARDhighly similar to ( 581) loc\_os03g62060 12003.m11084 protein IAA-amino acid hydrolase ILR1 precursor, putative, expressed seq=cds; coord=5:1569977..1573584:-1; parent\_gene=GRMZM2G125552'

'weakly similar to ( 126) AT5G40080 | Symbols: | 60S ribosomal protein-related | chr5:16040190-16041529 REVERSEweakly similar to ( 160) loc\_os02g40490 12002.m09135 protein conserved hypothetical protein seq=cds; coord=5:1578552..1582765:-1; parent\_gene=GRMZM2G125784'

'highly similar to ( 557) AT2G47070 | Symbols: SPL1 | SPL1 (SQUAMOSA PROMOTER BINDING PROTEIN-LIKE 1); DNA binding / transcription factor | chr2:19337144-19340552 FORWARDvery weakly similar to (97.8) LG1\_MAIZE LIGULELESS1 protein - Zea mays (Maize)nearly identical (1281) loc\_os03g61760 12003.m11057 protein squamosa promoter-binding-like protein 12, putative, expressed seq=cds; coord=5:1845813..1852802:-1; parent\_gene=GRMZM2G138421'

'moderately similar to ( 366) AT3G46450 | Symbols: | SEC14 cytosolic factor family protein / phosphoglyceride transfer family protein | chr3:17093297-17095319 REVERSEhighly similar to ( 694) loc\_os03g60610 12003.m101547 protein CRAL/TRIO domain containing protein, expressed seq=cds; coord=5:2350263..2356801:1; parent\_gene=GRMZM2G003108'

'moderately similar to ( 253) AT4G16420 | Symbols: ADA2B, PRZ1 | ADA2B (HOMOLOG OF YEAST ADA2 2B); DNA binding / transcription coactivator/ transcription factor | chr4:9262805-9265775 REVERSEmoderately similar to ( 436) loc\_os03g53960 12003.m10361 protein transcriptional adaptor, putative, expressed seq=cds; coord=5:7144610..7149251:-1; parent\_gene=GRMZM2G129817'

'moderately similar to ( 417) AT1G66170 | Symbols: MMD1 | MMD1 (MALE MEIOCYTE DEATH 1); DNA binding / protein binding / zinc ion binding | chr1:24638793-24641222 REVERSEhighly similar to ( 932) loc\_os03g50780 12003.m10064 protein PHD-finger family protein, expressed seq=cds; coord=5:10436880..10440158:1; parent\_gene=GRMZM2G408897'

'moderately similar to ( 448) AT1G02050 | Symbols: | chalcone and stilbene synthase family protein | chr1:359164-360441 REVERSEmoderately similar to ( 261) THS1\_VITVI Stilbene synthase 1 (EC 2.3.1.95) (Resveratrol synthase 1) (Trihydroxystilbene synthase 1) (PSV25) - Vitis vinifera (Grape)highly similar to ( 619) loc\_os10g34360 12010.m06262 protein chalcone synthase G, putative, expressed seq=cds; coord=5:26971466..26975726:1; parent\_gene=GRMZM2G477683'

'moderately similar to ( 349) AT1G80830 | Symbols: NRAMP1, PMIT1, ATNRAMP1 | NRAMP1 (NATURAL RESISTANCE-ASSOCIATED MACROPHAGE PROTEIN 1); inorganic anion transmembrane transporter/ manganese ion transmembrane transporter/ metal ion transmembrane transporter | chr1:30373066-30375644 REVERSEhighly similar to ( 516) loc\_os02g03900 12002.m05739 protein metal transporter Nramp6, putative, expressed seq=cds; coord=5:74612262..74615918:1; parent\_gene=GRMZM2G168747'

'highly similar to ( 588) AT2G26710 | Symbols: BAS1, CYP734A1, CYP72B1 | BAS1 (PHYB ACTIVATION TAGGED SUPPRESSOR 1); oxygen binding / steroid hydroxylase | chr2:11380700-11383413 FORWARDmoderately similar to ( 328) C72A1\_CATRO Cytochrome P450 72A1 (EC 1.3.3.9) (CYPLXXII) (Secologanin synthase) (SLS) - Catharanthus roseus (Rosy periwinkle) (Madagascar periwinkle)highly similar to ( 860) loc\_os02g11020 12002.m06400 protein cytochrome P450 72A1, putative, expressed seq=cds; coord=5:110010532..110013072:1; parent\_gene=GRMZM2G045319'

'nearly identical (1221) AT3G14570 | Symbols: ATGSL04, gsl04, atgsl4 | ATGSL04 (glucan synthase-like 4); 1,3-beta-glucan synthase/ transferase, transferring glycosyl groups | chr3:4892643-4902628 FORWARDnearly identical (1493) loc\_os02g14900 12002.m06734 protein 1,3-beta-glucan synthase component family protein, expressed seq=cds; coord=5:144098266..144117111:-1; parent\_gene=GRMZM2G111529'

'highly similar to ( 617) AT5G13160 | Symbols: PBS1 | PBS1 (avrPphB susceptible 1); kinase/ protein serine/threonine kinase | chr5:4176854-4179682 FORWARDmoderately similar to ( 247) NORK\_PEA Nodulation receptor kinase precursor (EC 2.7.11.1) - Pisum sativum (Garden pea)highly similar to ( 846) loc\_os02g30900 12002.m08233 protein protein kinase APK1A, chloroplast precursor, putative, expressed seq=cds; coord=5:164881570..164887792:-1; parent\_gene=GRMZM2G137468'

'moderately similar to ( 308) AT3G50700 | Symbols: AtIDD2 | AtIDD2 (Arabidopsis thaliana Indeterminate(ID)-Domain 2); nucleic acid binding / transcription factor/ zinc ion binding | chr3:18840945-18842829 FORWARDhighly similar to ( 734) loc\_os02g31890 12002.m08282 protein zinc finger, C2H2-type, putative seq=cds; coord=5:166856814..166859192:1; parent\_gene=GRMZM2G320287'

'moderately similar to ( 302) AT2G35930 | Symbols: PUB23 | PUB23 (PLANT U-BOX 23); ubiquitin-protein ligase | chr2:15083101-15084336 REVERSEvery weakly similar to (95.5) SPL11\_ORYSA Spotted leaf protein 11 (Spotted leaf11) (Cell death-related protein SPL11) - Oryza sativa (Rice)highly similar to ( 515) loc\_os02g33590 12002.m08452 protein ubiquitin-protein ligase, putative, expressed seq=cds; coord=5:170163954..170165367:-1; parent\_gene=GRMZM2G071484'

'very weakly similar to (87.8) AT2G45210 | Symbols: | auxin-responsive protein-related | chr2:18641884-18642372 FORWARDweakly similar to ( 181) loc\_os02g42990 12002.m100801 protein OsSAUR11 - Auxin-responsive SAUR gene family member, expressed seq=cds; coord=5:189620994..189622113:-1; parent\_gene=GRMZM2G391596'



'moderately similar to ( 223) AT2G27230 | Symbols: LHW | LHW (LONESOME HIGHWAY); protein homodimerization/ transcription activator/ transcription factor | chr2:11650895-11653840 FORWARDhighly similar to ( 880) loc\_os02g45170 12002.m09556 protein expressed protein seq=cds; coord=5:194705173..194710444:1; parent\_gene=GRMZM2G144097'

'weakly similar to ( 108) AT5G08130 | Symbols: | BIM1; DNA binding / protein binding / transcription factor | chr5:2606655-2608652 REVERSEmoderately similar to ( 290) loc\_os02g49480 12002.m09982 protein transcription factor BIM1, putative, expressed seq=cds; coord=5:204517824..204522813:-1; parent\_gene=GRMZM2G317450'

'highly similar to ( 838) AT1G68930 | Symbols: | pentatricopeptide (PPR) repeat-containing protein | chr1:25918314-25920545 FORWARDweakly similar to ( 103) RF1\_ORYSA Rf1 protein, mitochondrial precursor (PPR protein) (Fertility restorer) (Restorer for CMS) - Oryza sativa (Rice)nearly identical (1197) loc\_os02g01610 12002.m33989 protein tetratricopeptide-like helical, putative, expressed seq=cds; coord=5:206572964..206575640:-1; parent\_gene=GRMZM2G053396'

'moderately similar to ( 288) AT4G08950 | Symbols: EXO | EXO (EXORDIUM) | chr4:5740378-5741322 FORWARDmoderately similar to ( 407) loc\_os02g52000 12002.m10231 protein phi-1-like phosphate-induced protein, putative, expressed seq=cds; coord=5:208637277..208638686:-1; parent\_gene=GRMZM2G081214'

'moderately similar to ( 393) AT5G35370 | Symbols: | ATP binding / carbohydrate binding / kinase/ protein kinase/ protein serine/threonine kinase/ protein tyrosine kinase/ sugar binding | chr5:13588564-13591182 REVERSEmoderately similar to ( 206) KPRO\_MAIZE Putative receptor protein kinase ZmPK1 precursor (EC 2.7.11.1) - Zea mays (Maize)highly similar to ( 568) loc\_os02g52850 12002.m10315 protein ATP binding protein, putative, expressed seq=cds; coord=5:210043564..210046543:-1; parent\_gene=GRMZM2G058220'

'weakly similar to ( 157) AT2G32950 | Symbols: COP1, ATCOP1, DET340, FUS1, EMB168 | COP1 (CONSTITUTIVE PHOTOMORPHOGENIC 1); protein binding / ubiquitin-protein ligase | chr2:13978000-13983282 FORWARDweakly similar to ( 155) COP1\_PEA E3 ubiquitin ligase protein COP1 (EC 6.3.2.-) (Constitutive photomorphogenesis protein 1) - Pisum sativum (Garden pea)moderately similar to ( 218) loc\_os02g53140 12002.m10343 protein ubiquitin ligase protein COP1, putative, expressed seq=cds; coord=5:210747893..210749120:-1; parent\_gene=GRMZM2G104920'

'moderately similar to ( 243) AT4G33440 | Symbols: | glycoside hydrolase family 28 protein / polygalacturonase (pectinase) family protein | chr4:16092020-16094732 FORWARDmoderately similar to ( 298) loc\_os08g01600 12008.m04308 protein polygalacturonase, putative, expressed seq=cds; coord=6:1239602..1242853:-1; parent\_gene=GRMZM2G004435'

'weakly similar to ( 137) loc\_os08g01670 12008.m04315 protein c/VIF2, putative, expressed seq=cds; coord=6:1996014..1996736:-1; parent\_gene=AC186577.3\_FG006'

'weakly similar to ( 148) AT5G37710 | Symbols: | lipase class 3 family protein / calmodulin-binding heat-shock protein, putative | chr5:14979159-14981400 FORWARDmoderately similar to ( 204) loc\_os06g14490 12006.m32040 protein calmodulin-binding heat-shock protein, putative, expressed seq=cds; coord=6:118601060..118602117:1; parent\_gene=GRMZM2G174315'

'very weakly similar to (93.6) AT2G04410 | Symbols: | FUNCTIONS IN: molecular\_function unknown; INVOLVED IN: biological\_process unknown; LOCATED IN: plasma membrane; EXPRESSED IN: 24 plant structures; EXPRESSED DURING: 15 growth stages; CONTAINS InterPro DOMAIN/s: Defence response, Rin4 (InterPro:IPR008700); BEST Arabidopsis thaliana protein match is: NOI (TAIR:AT5G55850.1); Has 141 Blast hits to 140 proteins in 13 species: Archae - 0; Bacteria - 0; Metazoa - 0; Fungi - 0; Plants - 139; Viruses - 0; Other Eukaryotes - 2 (source: NCBI BLINK). | chr2:1534012-1535040 REVERSEweakly similar to ( 135) loc\_os06g17870 12006.m06499 protein nitrate-induced NOI protein, putative, expressed seq=cds; coord=6:119855348..119858902:1; parent\_gene=GRMZM2G162788'

'very weakly similar to (81.3) AT2G35040 | Symbols: | AICARFT/IMPCHase bienzyme family protein | chr2:14765347-14768269 REVERSEvery weakly similar to (82.4) loc\_os08g10570 12008.m26473 protein bifunctional purine biosynthesis protein purH, putative, expressed seq=cds; coord=6:121022185..121024287:1; parent\_gene=GRMZM2G164665'

'moderately similar to ( 368) AT4G18550 | Symbols: | lipase class 3 family protein | chr4:10225006-10226862 REVERSEhighly similar to ( 525) loc\_os05g49830 12005.m09053 protein triacylglycerol lipase, putative, expressed seq=cds; coord=6:165625344..165626546:1; parent\_gene=AC231411.1\_FG011'

'moderately similar to ( 368) AT4G18550 | Symbols: | lipase class 3 family protein | chr4:10225006-10226862 REVERSEhighly similar to ( 525) loc\_os05g49830 12005.m09053 protein triacylglycerol lipase, putative, expressed seq=cds; coord=6:165625344..165626546:1; parent\_gene=AC231411.1\_FG011'

'moderately similar to ( 368) AT4G18550 | Symbols: | lipase class 3 family protein | chr4:10225006-10226862 REVERSEhighly similar to ( 525) loc\_os05g49830 12005.m09053 protein triacylglycerol lipase, putative, expressed seq=cds; coord=6:165625344..165626546:1; parent\_gene=AC231411.1\_FG011'

'moderately similar to ( 368) AT4G18550 | Symbols: | lipase class 3 family protein | chr4:10225006-10226862 REVERSEhighly similar to ( 525) loc\_os05g49830 12005.m09053 protein triacylglycerol lipase, putative, expressed seq=cds; coord=6:165625344..165626546:1; parent\_gene=AC231411.1\_FG011'

'weakly similar to ( 116) loc\_os05g50270 12005.m09096 protein GATA transcription factor 19, putative, expressed seq=cds; coord=6:166077055..166078403:-1; parent\_gene=GRMZM2G325850'

'highly similar to ( 528) AT3G14420 | Symbols: | (S)-2-hydroxy-acid oxidase, peroxisomal, putative / glycolate oxidase, putative / short chain alpha-hydroxy acid oxidase, putative | chr3:4821899-4823899 FORWARDhighly similar to ( 524) GOX\_SPIOL Peroxisomal (S)-2-hydroxy-acid oxidase (EC 1.1.3.15) (Glycolate oxidase) (GOX) (Short chain alpha-hydroxy acid oxidase) - Spinacia oleracea (Spinach)highly similar to ( 556) loc\_os07g05820 12007.m29070 protein hydroxyacid oxidase 1, putative, expressed seq=cds; coord=7:5523491..5527292:1; parent\_gene=GRMZM2G129246'

'moderately similar to ( 319) AT2G06530 | Symbols: VPS2.1 | VPS2.1 | chr2:2588740-2590285 REVERSEmoderately similar to ( 342) loc\_os07g13270 12007.m29110 protein charged multivesicular body protein 2a, putative, expressed seq=cds; coord=7:22154867..22161180:1; parent\_gene=GRMZM2G431900'

'moderately similar to ( 451) AT1G32450 | Symbols: NRT1.5 | NRT1.5 (NITRATE TRANSPORTER 1.5); nitrate transmembrane transporter/ transporter | chr1:11715337-11719807 REVERSEmoderately similar to ( 434) loc\_os02g46460 12002.m09683 protein peptide transporter PTR2, putative, expressed seq=cds; coord=7:25089776..25092351:-1; parent\_gene=GRMZM2G156794'

'highly similar to ( 573) AT3G06920 | Symbols: | pentatricopeptide (PPR) repeat-containing protein | chr3:2181717-2184449 FORWARDweakly similar to ( 186) RF1\_ORYSA Rfl protein, mitochondrial precursor (PPR protein) (Fertility restorer) (Restorer for CMS) - Oryza sativa (Rice)highly similar to ( 697) loc\_os07g14530 12007.m079646 protein expressed protein seq=cds; coord=7:25155947..25157555:1; parent\_gene=GRMZM2G086757'

'moderately similar to ( 434) AT1G80830 | Symbols: NRAMP1, PMIT1, ATNRAMP1 | NRAMP1 (NATURAL RESISTANCE-ASSOCIATED MACROPHAGE PROTEIN 1); inorganic anion transmembrane transporter/ manganese ion transmembrane transporter/ metal ion transmembrane transporter | chr1:30373066-30375644 REVERSEhighly similar to ( 632) loc\_os07g15370 12007.m05981 protein metal transporter Nramp6, putative, expressed seq=cds; coord=7:26964762..26967940:-1; parent\_gene=GRMZM2G147560'

'moderately similar to ( 236) AT2G03890 | Symbols: | phosphatidylinositol 3- and 4-kinase family protein | chr2:1186199-1188151 FORWARDmoderately similar to ( 404) loc\_os09g29890 12009.m22000 protein phosphatidylinositol 3- and 4-kinase family protein, expressed seq=cds; coord=7:130092349..130094061:-1; parent\_gene=AC225205.3\_FG003'

'highly similar to ( 610) AT5G44240 | Symbols: | haloacid dehalogenase-like hydrolase family protein | chr5:17817619-17823598 FORWARDhighly similar to ( 603) loc\_os11g25980 12011.m06519 protein phospholipid-transporting ATPase 2, putative, expressed seq=cds; coord=7:161834088..161851386:-1; parent\_gene=GRMZM2G411916'

'moderately similar to ( 237) AT4G03140 | Symbols: | binding / catalytic/ oxidoreductase | chr4:1392191-1393662 FORWARDweakly similar to ( 192) TS2\_MAIZE Sex determination protein tasselseed-2 - Zea mays (Maize)moderately similar to ( 368) loc\_os07g40250 12007.m08266 protein sex determination protein tasselseed-2, putative, expressed seq=cds; coord=7:162398192..162399451:1; parent\_gene=GRMZM2G076981'

'moderately similar to ( 226) loc\_os07g47400 12007.m08957 protein SRC2, putative, expressed seq=cds; coord=7:172433682..172434802:1; parent\_gene=GRMZM2G364643'

'nearly identical (1079) AT2G40540 | Symbols: KT2, ATKT2, SHY3, KUP2, ATKUP2, TRK2 | KT2 (POTASSIUM TRANSPORTER 2); potassium ion transmembrane transporter | chr2:16931445-16934516 FORWARDnearly identical (1287) HAK9\_ORYSA Probable potassium transporter 9 (OsHAK9) - Oryza sativa (Rice)nearly identical (1287) loc\_os07g48130 12007.m079793 protein potassium transporter 9, putative, expressed seq=cds; coord=7:172935556..172939916:-1; parent\_gene=GRMZM2G166738'

'weakly similar to ( 131) AT5G39660 | Symbols: CDF2 | CDF2 (CYCLING DOF FACTOR 2); DNA binding / protein binding / transcription factor | chr5:15878920-15880712 FORWARDvery weakly similar to (92.8) MNB1A\_MAIZE Dof zinc finger protein MNB1A - Zea mays (Maize)moderately similar to ( 399) loc\_os07g48570 12007.m09068 protein expressed protein seq=cds; coord=7:173806883..173808319:-1; parent\_gene=AC155434.2\_FG006'

'moderately similar to ( 290) AT2G45570 | Symbols: CYP76C2 | CYP76C2; electron carrier/ heme binding / iron ion binding / monooxygenase/ oxygen binding | chr2:18779935-18781922 REVERSEmoderately similar to ( 233) C76A2\_SOLME Cytochrome P450 76A2 (EC 1.14.-.-) (CYPLXXVIA2) (P-450EG7) - Solanum melongena (Eggplant) (Aubergine)moderately similar to ( 349) loc\_os09g27510 12009.m05902 protein cytochrome P450 76C4, putative, expressed seq=cds; coord=7:173961868..173963500:-1; parent\_gene=GRMZM2G425127'

'highly similar to ( 929) AT2G01320 | Symbols: | ABC transporter family protein | chr2:154669-158063 REVERSEmoderately similar to ( 243) PDR15\_ORYSA Pleiotropic drug resistance protein 15 - Oryza sativa (Rice)nearly identical (1115) loc\_os01g03144 12001.m06953 protein ABC-2 type transporter family protein, expressed seq=cds; coord=8:10755838..10761776:-1; parent\_gene=GRMZM2G119345'

'moderately similar to ( 414) AT5G16440 | Symbols: IPP1 | IPP1 (ISOPENTENYL DIPHOSPHATE ISOMERASE 1); isopentenyl-diphosphate delta-isomerase | chr5:5371765-5373575 FORWARDmoderately similar to ( 434) loc\_os05g34180 12005.m07649 protein isopentenyl-diphosphate delta-isomerase I, putative, expressed seq=cds; coord=8:104659886..104663941:-1; parent\_gene=GRMZM2G145029'

'highly similar to ( 657) AT5G61840 | Symbols: GUT1 | GUT1; catalytic/ glucuronoxylan glucuronosyltransferase | chr5:24839365-24841703 REVERSEhighly similar to ( 707) loc\_os01g70180 12001.m150448 protein secondary cell wall-related glycosyltransferase family 47, putative, expressed seq=cds; coord=8:160385132..160388604:1; parent\_gene=GRMZM2G134308'

'weakly similar to ( 198) AT3G12600 | Symbols: atnudt16 | atnudt16 (Arabidopsis thaliana Nudix hydrolase homolog 16); hydrolase | chr3:4004676-4005995 FORWARDmoderately similar to ( 248) loc\_os04g53380 12004.m10229 protein expressed protein seq=cds; coord=8:161926660..161930458:1; parent\_gene=GRMZM2G013060'

'weakly similar to ( 198) AT3G12600 | Symbols: atnudt16 | atnudt16 (Arabidopsis thaliana Nudix hydrolase homolog 16); hydrolase | chr3:4004676-4005995 FORWARDmoderately similar to ( 248) loc\_os04g53380 12004.m10229 protein expressed protein seq=cds; coord=8:161926660..161930458:1; parent\_gene=GRMZM2G013060'

'moderately similar to ( 266) AT4G38620 | Symbols: ATMYB4, MYB4 | MYB4; DNA binding / transcription factor | chr4:18053866-18054876 FORWARDmoderately similar to ( 273) MYB38\_MAIZE Myb-related protein Zm38 - Zea mays (Maize)moderately similar to ( 325) loc\_os01g65370 12001.m12650 protein transcription repressor MYB4, putative seq=cds; coord=8:165875616..165876842:-1; parent\_gene=GRMZM2G405094'

'moderately similar to ( 225) AT1G11360 | Symbols: | universal stress protein (USP) family protein | chr1:3822171-3822899 REVERSEmoderately similar to ( 330) loc\_os01g57450 12001.m11896 protein USP family protein, putative, expressed seq=cds; coord=8:171885210..171889098:1; parent\_gene=GRMZM2G106690'

'highly similar to ( 559) AT2G41790 | Symbols: | peptidase M16 family protein / insulinase family protein | chr2:17429453-17436110 REVERSEhighly similar to ( 738) loc\_os01g57073 12001.m11864 protein insulin-degrading enzyme, putative, expressed seq=cds; coord=8:172180747..172198680:-1; parent\_gene=GRMZM2G133249'

'highly similar to ( 719) AT5G19740 | Symbols: | peptidase M28 family protein | chr5:6673986-6676767  
FORWARDnearly identical (1075) loc\_os01g54010 12001.m11565 protein glutamate carboxypeptidase 2, putative,  
expressed seq=cds; coord=8:175065667..175070741:-1; parent\_gene=GRMZM2G118806'

'very weakly similar to (81.6) AT3G16490 | Symbols: IQD26 | IQD26 (IQ-domain 26); calmodulin binding |  
chr3:5603962-5605489 REVERSEweakly similar to ( 197) loc\_os01g53980 12001.m11562 protein calmodulin  
binding protein, putative, expressed seq=cds; coord=8:175150778..175151936:-1; parent\_gene=AC203173.3\_FG001'

'weakly similar to ( 128) AT2G45100 | Symbols: | RNA polymerase II transcription factor/ protein binding /  
transcription activator/ transcription regulator/ translation initiation factor/ zinc ion binding | chr2:18595348-  
18598088 REVERSEweakly similar to ( 186) loc\_os05g23940 12005.m06688 protein RNA polymerase II  
transcription factor/ transcription factor/ zinc ion binding protein, putative, expressed seq=cds;  
coord=9:2736110..2739733:-1; parent\_gene=GRMZM2G180836'

'moderately similar to ( 421) AT1G66430 | Symbols: | pfkB-type carbohydrate kinase family protein | chr1:24778400-  
24780393 FORWARDmoderately similar to ( 337) SCRK2\_MAIZE Fructokinase-2 (EC 2.7.1.4) (ZmFRK2) - Zea  
mays (Maize)highly similar to ( 530) loc\_os06g12600 12006.m05976 protein fructokinase-2, putative, expressed  
seq=cds; coord=9:3856795..3860954:-1; parent\_gene=GRMZM2G072091'

'moderately similar to ( 483) AT1G76680 | Symbols: OPR1, ATOPR1 | OPR1; 12-oxophytodienoate reductase |  
chr1:28776982-28778271 FORWARDhighly similar to ( 601) loc\_os06g11290 12006.m05846 protein 12-  
oxophytodienoate reductase 2, putative, expressed seq=cds; coord=9:7308153..7309906:1;  
parent\_gene=GRMZM2G000236'

'moderately similar to ( 216) AT2G33620 | Symbols: | DNA-binding family protein / AT-hook protein 1 (AHP1) |  
chr2:14234749-14236563 FORWARDmoderately similar to ( 385) loc\_os10g42230 12010.m50380 protein AT-hook  
protein 1, putative, expressed seq=cds; coord=9:113056029..113059080:1; parent\_gene=AC225193.3\_FG003'

'weakly similar to ( 180) AT5G50400 | Symbols: ATPAP27, PAP27 | PAP27 (PURPLE ACID PHOSPHATASE 27);  
acid phosphatase/ protein serine/threonine phosphatase | chr5:20523575-20526231 REVERSEweakly similar to ( 159)  
NPP\_HORVU Nucleotide pyrophosphatase/phosphodiesterase (EC 3.-.-) (Fragments) - Hordeum vulgare  
(Barley)moderately similar to ( 397) loc\_os01g58640 12001.m12006 protein nucleotide  
pyrophosphatase/phosphodiesterase, putative, expressed seq=cds; coord=9:113231980..113237852:-1;  
parent\_gene=GRMZM2G007754'

'moderately similar to ( 367) AT2G26450 | Symbols: | pectinesterase family protein | chr2:11251279-11253446  
FORWARDmoderately similar to ( 298) PME3\_CITSI Pectinesterase-3 precursor (EC 3.1.1.11) (Pectin methylesterase  
3) (PE 3) - Citrus sinensis (Sweet orange)highly similar to ( 716) loc\_os03g28090 12003.m08133 protein  
pectinesterase-2 precursor, putative, expressed seq=cds; coord=9:122123285..122129038:1;  
parent\_gene=GRMZM2G314663'

'moderately similar to ( 285) AT1G20030 | Symbols: | pathogenesis-related thaumatin family protein | chr1:6945850-  
6947017 FORWARDmoderately similar to ( 210) TLP1\_PRUPE Thaumatin-like protein 1 precursor (PpAZ44) -  
Prunus persica (Peach)moderately similar to ( 374) loc\_os03g14050 12003.m34813 protein thaumatin-like protein 1  
precursor, putative, expressed seq=cds; coord=9:143036859..143040005:-1; parent\_gene=GRMZM2G149809'

'nearly identical (1081) AT3G59420 | Symbols: ACR4 | ACR4 (ARABIDOPSIS CRINKLY4); kinase/ transmembrane receptor protein kinase | chr3:21959871-21962558 REVERSEnearly identical (1823) CRI4\_MAIZE Putative receptor protein kinase CRINKLY4 precursor (EC 2.7.11.1) - Zea mays (Maize)nearly identical (1608) loc\_os03g43670 12003.m09410 protein receptor protein kinase CRINKLY4 precursor, putative, expressed seq=cds; coord=10:5587952..5591862:1; parent\_gene=GRMZM2G051637'

'very weakly similar to (84.3) AT1G19490 | Symbols: | bZIP transcription factor family protein | chr1:6751953-6753959 REVERSEvery weakly similar to (99.0) loc\_os11g05640 12011.m04761 protein bZIP transcription factor family protein, expressed seq=cds; coord=10:5917109..5918148:1; parent\_gene=GRMZM2G365754'

'weakly similar to ( 132) AT4G08150 | Symbols: KNAT1, BP, BP1 | KNAT1 (KNOTTED-LIKE FROM ARABIDOPSIS THALIANA); transcription factor | chr4:5147969-5150610 REVERSEmoderately similar to ( 216) KN1\_MAIZE Homeotic protein knotted-1 - Zea mays (Maize)weakly similar to ( 192) loc\_os03g51690 12003.m35624 protein homeobox protein OSH1, putative, expressed seq=cds; coord=10:6748624..6749646:-1; parent\_gene=GRMZM2G060050'

'weakly similar to ( 103) AT5G25830 | Symbols: | zinc finger (GATA type) family protein | chr5:9004398-9005502 REVERSEweakly similar to ( 105) loc\_os01g54210 12001.m11585 protein GATA transcription factor 13, putative, expressed seq=cds; coord=10:9530641..9532659:1; parent\_gene=GRMZM2G324131'

'highly similar to ( 525) AT3G16850 | Symbols: | glycoside hydrolase family 28 protein / polygalacturonase (pectinase) family protein | chr3:5748692-5750981 FORWARDhighly similar to ( 698) loc\_os12g36810 12012.m07466 protein polygalacturonase, putative, expressed seq=cds; coord=10:22363483..22367295:-1; parent\_gene=GRMZM2G113815'

'weakly similar to ( 175) AT3G03860 | Symbols: ATAPRL5 | ATAPRL5 (APR-like 5) | chr3:992465-994315 FORWARDmoderately similar to ( 325) loc\_os12g35640 12012.m07357 protein OsAPRL6 - Oryza sativa adenosine 5'-phosphosulfate reductase-like, expressed seq=cds; coord=10:24443942..24448936:-1; parent\_gene=GRMZM2G141848'

'highly similar to ( 590) AT1G12110 | Symbols: NRT1.1, CHL1-1, NRT1, B-1, ATNRT1, CHL1 | NRT1.1; nitrate transmembrane transporter/ transporter | chr1:4105341-4109290 FORWARDhighly similar to ( 811) loc\_os08g05910 12008.m26584 protein peptide transporter PTR2, putative, expressed seq=cds; coord=10:80042433..80048640:1; parent\_gene=GRMZM2G086496'

'weakly similar to ( 140) AT4G16270 | Symbols: | peroxidase 40 (PER40) (P40) | chr4:9205038-9206483 FORWARDweakly similar to ( 132) PERN\_IPOBA Neutral peroxidase precursor (EC 1.11.1.7) (SwPN1) - Ipomoea batatas (Sweet potato) (Batate)moderately similar to ( 279) loc\_os05g04410 12005.m04974 protein peroxidase 2 precursor, putative, expressed seq=cds; coord=10:85683513..85689992:1; parent\_gene=GRMZM2G006727'

'weakly similar to ( 160) AT4G05490 | Symbols: | F-box family protein (FBL22) | chr4:2771044-2772252 REVERSEmoderately similar to ( 315) loc\_os02g21240 12002.m07364 protein ubiquitin-protein ligase, putative, expressed seq=cds; coord=10:87007644..87011667:1; parent\_gene=GRMZM2G028014'

'highly similar to ( 557) AT1G08250 | Symbols: ADT6 | ADT6 (arogenate dehydratase 6); arogenate dehydratase/ prephenate dehydratase | chr1:2588994-2590235 REVERSEhighly similar to ( 687) loc\_os04g33390 12004.m08428 protein P-protein, putative, expressed seq=cds; coord=10:113515151..113516898:1; parent\_gene=GRMZM2G125923'

'weakly similar to ( 143) AT1G75540 | Symbols: STH2 | STH2 (SALT TOLERANCE HOMOLOG2); transcription factor/ zinc ion binding | chr1:28366059-28367398 FORWARDmoderately similar to ( 280) loc\_os04g45690 12004.m09520 protein salt tolerance-like protein, putative, expressed seq=cds; coord=10:133502022..133503566:1; parent\_gene=GRMZM2G098442'

'moderately similar to ( 216) AT1G62040 | Symbols: ATG8C | ATG8C (autophagy 8c); microtubule binding | chr1:22933216-22934253 FORWARDmoderately similar to ( 226) loc\_os08g09240 12008.m26825 protein autophagy-related protein 8 precursor, putative, expressed seq=cds; coord=10:142965742..142968913:1; parent\_gene=GRMZM2G419694'

'moderately similar to ( 216) AT1G62040 | Symbols: ATG8C | ATG8C (autophagy 8c); microtubule binding | chr1:22933216-22934253 FORWARDmoderately similar to ( 226) loc\_os08g09240 12008.m26825 protein autophagy-related protein 8 precursor, putative, expressed seq=cds; coord=10:142965742..142968913:1; parent\_gene=GRMZM2G419694'

'nearly identical (1130) AT1G11720 | Symbols: ATSS3 | ATSS3 (starch synthase 3); starch synthase/ transferase, transferring glycosyl groups | chr1:3952511-3956840 FORWARDnearly identical (1201) SSY3\_SOLTU Soluble starch synthase 3, chloroplast precursor (EC 2.4.1.21) (SS III) (Soluble starch synthase III) - Solanum tuberosum (Potato)nearly identical (1712) loc\_os04g53310 12004.m10222 protein soluble starch synthase 3, chloroplast precursor, putative, expressed seq=cds; coord=10:142920487..142929525:1; parent\_gene=GRMZM2G121612'

'very weakly similar to (99.4) AT1G78390 | Symbols: NCED9, ATNCED9 | NCED9 (NINE-CIS-EPOXYCAROTENOID DIOXYGENASE 9); 9-cis-epoxycarotenoid dioxygenase | chr1:29490895-29492868 REVERSEweakly similar to ( 121) loc\_os07g05940 12007.m05058 protein viviparous-14, putative, expressed seq=cds; coord=10:144189184..144189881:-1; parent\_gene=AC188128.3\_FG002'

'nearly identical (1406) AT3G23780 | Symbols: NRPD2A, DRD2, NRPD2, DMS2, NRPE2 | NRPD2A; DNA binding / DNA-directed RNA polymerase | chr3:8567971-8573819 REVERSEweakly similar to ( 145) RPOB\_CHAGL DNA-directed RNA polymerase beta chain (EC 2.7.7.6) (PEP) (Plastid-encoded RNA polymerase subunit beta) (RNA polymerase subunit beta) - Chaetosphaeridium globosumnearly identical (2018) loc\_os04g54840 12004.m10376 protein NRPD2a, putative, expressed seq=cds; coord=10:144716135..144739736:1; parent\_gene=GRMZM2G427031'

'moderately similar to ( 289) AT1G62640 | Symbols: KAS III | KAS III (3-KETOACYL-ACYL CARRIER PROTEIN SYNTHASE III); 3-oxoacyl-[acyl-carrier-protein] synthase/ catalytic/ transferase, transferring acyl groups other than amino-acyl groups | chr1:23192502-23194737 FORWARDmoderately similar to ( 275) FABH\_SPIOL 3-oxoacyl-[acyl-carrier-protein] synthase III, chloroplast precursor (EC 2.3.1.41) (Beta-ketoacyl-ACP synthase III) (KAS III) - Spinacia oleracea (Spinach)moderately similar to ( 400) loc\_os04g55060 12004.m10398 protein 3-oxoacyl-synthase III, chloroplast precursor, putative, expressed seq=cds; coord=10:144982082..144986585:-1; parent\_gene=GRMZM2G003190'

---
