# Supplementary material
Source: PubMed Central journal article supplement (PMC4453775)
Supplement: supp_pp.15.00025_00025supptbl4.pdf [file supp_pp.15.00025_00025supptbl4.pdf]

**Table S4.** Summary of joint linkage mapping for 12 metabolites and first two principal compor

| Trait | QTL   | Marker  | Chr | cM    | DF | SS      | MS      | FValue  |
|-------|-------|---------|-----|-------|----|---------|---------|---------|
| AA    | m95   | PZA0139 | 1   | 116.5 | 26 | 14.3387 | 0.5515  | 3.1964  |
| AA    | m200  | PZA0010 | 2   | 38.6  | 26 | 16.1421 | 0.6209  | 3.5984  |
| AA    | m262  | PZA0352 | 2   | 97.5  | 26 | 30.6849 | 1.1802  | 6.8403  |
| AA    | m376  | PZD0002 | 3   | 80.8  | 26 | 12.175  | 0.4683  | 2.7141  |
| AA    | m395  | PZA0374 | 3   | 100.6 | 26 | 11.7846 | 0.4533  | 2.627   |
| AA    | m493  | PZA0027 | 4   | 80.6  | 26 | 14.3615 | 0.5524  | 3.2015  |
| AA    | m579  | PZA0211 | 5   | 56.2  | 26 | 18.7965 | 0.7229  | 4.1902  |
| AA    | m648  | PZA0345 | 5   | 91.9  | 26 | 10.9984 | 0.423   | 2.4518  |
| AA    | m677  | PZA0083 | 5   | 132.6 | 26 | 16.698  | 0.6422  | 3.7224  |
| AA    | m703  | PHM8909 | 6   | 18.6  | 26 | 17.8569 | 0.6868  | 3.9807  |
| AA    | m789  | PZA0121 | 7   | 49.5  | 26 | 11.3966 | 0.4383  | 2.5406  |
| AA    | m816  | PZA0272 | 7   | 81.2  | 26 | 16.2574 | 0.6253  | 3.6241  |
| AA    | m888  | PZA0301 | 8   | 62.3  | 26 | 19.3376 | 0.7438  | 4.3108  |
| AA    | m924  | PHM1562 | 8   | 88.5  | 26 | 13.1799 | 0.5069  | 2.9381  |
| AA    | m960  | zb7.2   | 9   | 38.9  | 26 | 25.6848 | 0.9879  | 5.7257  |
| AA    | m1067 | PHM1262 | 10  | 43.8  | 26 | 14.0668 | 0.541   | 3.1358  |
| AA    | m1091 | PZA0360 | 10  | 75.4  | 26 | 11.2361 | 0.4322  | 2.5048  |
| AA    | m1105 | PZA0006 | 10  | 93.7  | 26 | 12.6144 | 0.4852  | 2.812   |
| Chla  | m79   | PZA0320 | 1   | 89.7  | 26 | 4927.59 | 189.523 | 3.0384  |
| Chla  | m216  | PZA0137 | 2   | 59.9  | 26 | 4766.03 | 183.309 | 2.9387  |
| Chla  | m316  | PHM4204 | 3   | 38.3  | 26 | 4099.7  | 157.681 | 2.5279  |
| Chla  | m411  | PZA0314 | 3   | 127.7 | 26 | 9230.97 | 355.037 | 5.6918  |
| Chla  | m666  | PZA0266 | 5   | 110.7 | 26 | 5608.44 | 215.709 | 3.4582  |
| Chla  | m968  | PZB0111 | 9   | 41.8  | 26 | 5761.95 | 221.614 | 3.5528  |
| Chla  | m1106 | PZA0252 | 10  | 101.9 | 26 | 5013.19 | 192.815 | 3.0911  |
| Chlb  | m73   | PZA0275 | 1   | 87.9  | 26 | 113.644 | 4.3709  | 3.5191  |
| Chlb  | m87   | PZA0353 | 1   | 99.3  | 26 | 103.678 | 3.9876  | 3.2105  |
| Chlb  | m166  | PZA0123 | 1   | 196.8 | 18 | 122.272 | 6.7929  | 5.469   |
| Chlb  | m170  | PZA0085 | 1   | 199.4 | 18 | 940.037 | 52.2243 | 42.0462 |
| Chlb  | m175  | PHM7616 | 1   | 202.4 | 25 | 108.354 | 4.3342  | 3.4895  |
| Chlb  | m261  | PZA0075 | 2   | 94.9  | 26 | 81.0851 | 3.1187  | 2.5109  |
| Chlb  | m589  | PZA0153 | 5   | 58.3  | 26 | 85.6707 | 3.295   | 2.6529  |
| Chlb  | m818  | PZA0226 | 7   | 92.2  | 19 | 185.352 | 9.7554  | 7.8541  |
| Chlb  | m824  | PZA0222 | 7   | 112.2 | 23 | 152.625 | 6.6358  | 5.3426  |
| Fruc  | m304  | PZA0209 | 3   | 15    | 26 | 1.1576  | 0.0445  | 3.2379  |
| Fruc  | m339  | PZA0050 | 3   | 57.7  | 26 | 1.008   | 0.0388  | 2.8193  |
| Fruc  | m625  | PZA0014 | 5   | 76.9  | 26 | 0.8326  | 0.032   | 2.3287  |
| Fruc  | m680  | PZA0248 | 5   | 152.3 | 26 | 0.9     | 0.0346  | 2.5171  |
| Fruc  | m771  | PHM1550 | 7   | 47.8  | 26 | 1.5823  | 0.0609  | 4.4255  |
| Fruc  | m959  | PZA0305 | 9   | 34.5  | 26 | 0.8972  | 0.0345  | 2.5093  |
| Fruc  | m1035 | PHM2828 | 10  | 21.3  | 26 | 0.9488  | 0.0365  | 2.6537  |

|      |       |         |    |       |    |        |        |        |
|------|-------|---------|----|-------|----|--------|--------|--------|
| Fuma | m95   | PZA0139 | 1  | 116.5 | 26 | 0.0453 | 0.0017 | 2.4192 |
| Fuma | m192  | PZA0208 | 2  | 18.3  | 26 | 0.0362 | 0.0014 | 1.9292 |
| Fuma | m222  | PZA0249 | 2  | 67.9  | 26 | 0.0343 | 0.0013 | 1.8295 |
| Fuma | m276  | PZA0207 | 2  | 115.3 | 26 | 0.0416 | 0.0016 | 2.2203 |
| Fuma | m281  | PZA0360 | 2  | 120.5 | 26 | 0.0452 | 0.0017 | 2.4102 |
| Fuma | m425  | PZA0031 | 3  | 145.1 | 26 | 0.0366 | 0.0014 | 1.9537 |
| Fuma | m502  | PZA0219 | 4  | 93.2  | 26 | 0.0568 | 0.0022 | 3.0321 |
| Fuma | m559  | PZB0009 | 5  | 30.2  | 26 | 0.0424 | 0.0016 | 2.2631 |
| Fuma | m792  | PZA0193 | 7  | 50.7  | 26 | 0.0339 | 0.0013 | 1.8103 |
| Fuma | m805  | PZA0154 | 7  | 72.2  | 26 | 0.043  | 0.0017 | 2.2966 |
| Fuma | m830  | PZA0102 | 7  | 117.6 | 26 | 0.0397 | 0.0015 | 2.1161 |
| Fuma | m881  | PZA0201 | 8  | 58    | 26 | 0.0446 | 0.0017 | 2.3793 |
| Fuma | m923  | PZA0070 | 8  | 88.5  | 26 | 0.0466 | 0.0018 | 2.4856 |
| Fuma | m1081 | PZA0100 | 10 | 49.2  | 26 | 0.0369 | 0.0014 | 1.9674 |
| Fuma | m1106 | PZA0252 | 10 | 101.9 | 26 | 0.0384 | 0.0015 | 2.0489 |
| Gluc | m209  | PZA0059 | 2  | 53.3  | 26 | 3.1988 | 0.123  | 2.6071 |
| Gluc | m221  | PZA0199 | 2  | 64.2  | 26 | 2.8707 | 0.1104 | 2.3397 |
| Gluc | m315  | PZA0050 | 3  | 38.3  | 26 | 3.2912 | 0.1266 | 2.6824 |
| Gluc | m337  | PZA0258 | 3  | 57.6  | 26 | 3.172  | 0.122  | 2.5853 |
| Gluc | m429  | PZA0218 | 3  | 146.8 | 26 | 2.911  | 0.112  | 2.3725 |
| Gluc | m482  | PZA0345 | 4  | 58.9  | 26 | 3.1006 | 0.1193 | 2.5271 |
| Gluc | m548  | PZA0019 | 5  | 3.5   | 26 | 3.6982 | 0.1422 | 3.0141 |
| Gluc | m571  | PZA0152 | 5  | 47    | 26 | 4.3372 | 0.1668 | 3.5349 |
| Gluc | m625  | PZA0014 | 5  | 76.9  | 26 | 4.1872 | 0.161  | 3.4127 |
| Gluc | m774  | PZA0368 | 7  | 48.4  | 26 | 4.1015 | 0.1577 | 3.3428 |
| Gluc | m838  | PZA0227 | 7  | 135   | 26 | 3.7348 | 0.1436 | 3.044  |
| Gluc | m972  | PZA0303 | 9  | 44.6  | 26 | 3.148  | 0.1211 | 2.5657 |
| Gluc | m1046 | PZA0007 | 10 | 33.9  | 26 | 4.2259 | 0.1625 | 3.4442 |
| Glut | m87   | PZA0353 | 1  | 99.3  | 26 | 0.0969 | 0.0037 | 2.6546 |
| Glut | m262  | PZA0352 | 2  | 97.5  | 26 | 0.0939 | 0.0036 | 2.5742 |
| Glut | m409  | PZA0261 | 3  | 120.7 | 26 | 0.1329 | 0.0051 | 3.6428 |
| Glut | m577  | PHM565  | 5  | 53.9  | 26 | 0.0839 | 0.0032 | 2.2985 |
| Glut | m843  | PZA0036 | 8  | 17.1  | 26 | 0.0948 | 0.0036 | 2.5981 |
| Glut | m883  | PZA0357 | 8  | 59.7  | 26 | 0.1008 | 0.0039 | 2.7634 |
| Glut | m1101 | PZA0107 | 10 | 83.2  | 26 | 0.1266 | 0.0049 | 3.4682 |
| Mala | m41   | PZA0024 | 1  | 59    | 26 | 0.2054 | 0.0079 | 2.9528 |
| Mala | m191  | PZA0220 | 2  | 17.8  | 26 | 0.2441 | 0.0094 | 3.5088 |
| Mala | m230  | PZA0063 | 2  | 73.5  | 26 | 0.1865 | 0.0072 | 2.6806 |
| Mala | m322  | PZA0147 | 3  | 54.8  | 26 | 0.2396 | 0.0092 | 3.4445 |
| Mala | m411  | PZA0314 | 3  | 127.7 | 26 | 0.1765 | 0.0068 | 2.5374 |
| Mala | m426  | PZA0168 | 3  | 145.3 | 26 | 0.1635 | 0.0063 | 2.3496 |
| Mala | m624  | PZA0179 | 5  | 75.6  | 26 | 0.1853 | 0.0071 | 2.6632 |
| Mala | m834  | PZA0127 | 7  | 121.1 | 26 | 0.286  | 0.011  | 4.1105 |
| Mala | m1103 | PZA0100 | 10 | 91    | 26 | 0.2549 | 0.0098 | 3.6631 |
| Nitr | m5    | PHM2244 | 1  | 9.7   | 26 | 0.0028 | 0.0001 | 2.3773 |

|       |       |          |    |       |    |         |         |         |
|-------|-------|----------|----|-------|----|---------|---------|---------|
| Nitr  | m260  | PZA0173: | 2  | 91.5  | 26 | 0.0044  | 0.0002  | 3.7237  |
| Nitr  | m409  | PZA0261: | 3  | 120.7 | 24 | 0.0041  | 0.0002  | 3.7684  |
| Nitr  | m483  | PZA0214: | 4  | 60.6  | 25 | 0.0054  | 0.0002  | 4.7401  |
| Nitr  | m488  | PZA0192: | 4  | 69.8  | 26 | 0.0054  | 0.0002  | 4.5709  |
| Nitr  | m654  | PZA0035: | 5  | 100.2 | 26 | 0.0173  | 0.0007  | 14.5803 |
| Nitr  | m672  | PZA0054: | 5  | 123.1 | 26 | 0.0035  | 0.0001  | 2.9893  |
| Prot  | m406  | PZA0273: | 3  | 111.2 | 26 | 0.1626  | 0.0063  | 2.6939  |
| Prot  | m413  | PZA0075: | 3  | 129.8 | 26 | 0.1469  | 0.0057  | 2.4341  |
| Prot  | m616  | PZA0304: | 5  | 69.5  | 26 | 0.1985  | 0.0076  | 3.2896  |
| Prot  | m667  | PZA0039: | 5  | 110.9 | 26 | 0.1467  | 0.0056  | 2.4302  |
| Prot  | m898  | PZA0011: | 8  | 67.4  | 26 | 0.1647  | 0.0063  | 2.7285  |
| Prot  | m993  | PZA0323: | 9  | 56.7  | 26 | 0.2176  | 0.0084  | 3.6061  |
| Prot  | m1041 | PZA0046: | 10 | 31    | 26 | 0.1509  | 0.0058  | 2.501   |
| Star  | m3    | PZA0212: | 1  | 3.7   | 26 | 2.3431  | 0.0901  | 2.888   |
| Star  | m52   | PZA0229: | 1  | 65.7  | 26 | 3.1555  | 0.1214  | 3.8892  |
| Star  | m123  | PZA0226: | 1  | 149.7 | 26 | 2.2124  | 0.0851  | 2.7269  |
| Star  | m191  | PZA0220: | 2  | 17.8  | 26 | 2.3299  | 0.0896  | 2.8717  |
| Star  | m211  | PZA0314: | 2  | 54.9  | 26 | 4.4589  | 0.1715  | 5.4957  |
| Star  | m336  | PZA0311: | 3  | 57.3  | 26 | 3.8211  | 0.147   | 4.7096  |
| Star  | m540  | PZA0190: | 4  | 136.6 | 26 | 1.902   | 0.0732  | 2.3443  |
| Star  | m632  | PZA0025: | 5  | 81.7  | 26 | 3.6684  | 0.1411  | 4.5214  |
| Star  | m670  | PZA0098: | 5  | 114.3 | 26 | 2.6344  | 0.1013  | 3.247   |
| Star  | m770  | PZA0334: | 7  | 45.8  | 26 | 2.4628  | 0.0947  | 3.0354  |
| Star  | m914  | PHM4757  | 8  | 80.2  | 26 | 2.579   | 0.0992  | 3.1787  |
| Star  | m933  | PHM4786  | 8  | 100.3 | 26 | 3.1719  | 0.122   | 3.9094  |
| Star  | m946  | PZA0028: | 9  | 12.6  | 26 | 2.0702  | 0.0796  | 2.5516  |
| Star  | m1048 | PZA0285: | 10 | 35.8  | 26 | 3.5666  | 0.1372  | 4.396   |
| Sucr  | m28   | PHM1361  | 1  | 39.2  | 26 | 6.9897  | 0.2688  | 2.8145  |
| Sucr  | m608  | PHM5798  | 5  | 65.9  | 26 | 6.9401  | 0.2669  | 2.7945  |
| Sucr  | m715  | PZA0105: | 6  | 44.4  | 26 | 6.4752  | 0.249   | 2.6073  |
| Sucr  | m793  | PZA0223: | 7  | 51.2  | 26 | 6.9936  | 0.269   | 2.816   |
| Sucr  | m931  | PZA0002: | 8  | 98.2  | 26 | 7.0275  | 0.2703  | 2.8297  |
| Prin1 | m262  | PZA0352: | 2  | 97.5  | 26 | 222.312 | 8.5505  | 3.5573  |
| Prin1 | m409  | PZA0261: | 3  | 120.7 | 26 | 293.873 | 11.3028 | 4.7023  |
| Prin1 | m576  | PZA0142: | 5  | 53.6  | 26 | 181.103 | 6.9655  | 2.8979  |
| Prin1 | m674  | PZA0316: | 5  | 125.2 | 26 | 164.286 | 6.3187  | 2.6288  |
| Prin1 | m884  | PZA0073: | 8  | 59.7  | 26 | 193.524 | 7.4432  | 3.0966  |
| Prin1 | m924  | PHM1562  | 8  | 88.5  | 26 | 154.219 | 5.9315  | 2.4677  |
| Prin1 | m995  | PZA0232: | 9  | 57.7  | 26 | 172.252 | 6.6251  | 2.7562  |
| Prin1 | m1106 | PZA0252: | 10 | 101.9 | 26 | 266.384 | 10.2455 | 4.2625  |
| Prin2 | m27   | PZA0042: | 1  | 37.8  | 26 | 101.264 | 3.8948  | 2.826   |
| Prin2 | m52   | PZA0229: | 1  | 65.7  | 26 | 130.11  | 5.0042  | 3.6311  |
| Prin2 | m112  | PZA0066: | 1  | 134.7 | 26 | 82.3139 | 3.1659  | 2.2972  |
| Prin2 | m185  | PZA0090: | 2  | 6.8   | 26 | 107.584 | 4.1379  | 3.0024  |
| Prin2 | m214  | PZA0175: | 2  | 56.9  | 26 | 133.38  | 5.13    | 3.7223  |

|       |       |         |    |       |    |         |        |        |
|-------|-------|---------|----|-------|----|---------|--------|--------|
| Prin2 | m316  | PHM4204 | 3  | 38.3  | 26 | 92.9001 | 3.5731 | 2.5926 |
| Prin2 | m339  | PZA0050 | 3  | 57.7  | 26 | 109.353 | 4.2059 | 3.0518 |
| Prin2 | m632  | PZA0025 | 5  | 81.7  | 26 | 105.651 | 4.0635 | 2.9485 |
| Prin2 | m670  | PZA0098 | 5  | 114.3 | 26 | 117.647 | 4.5249 | 3.2832 |
| Prin2 | m715  | PZA0105 | 6  | 44.4  | 26 | 101.353 | 3.8982 | 2.8285 |
| Prin2 | m770  | PZA0334 | 7  | 45.8  | 26 | 191.174 | 7.3528 | 5.3352 |
| Prin2 | m883  | PZA0357 | 8  | 59.7  | 26 | 94.5954 | 3.6383 | 2.6399 |
| Prin2 | m1010 | PZA0225 | 9  | 74.2  | 26 | 85.8454 | 3.3017 | 2.3957 |
| Prin2 | m1044 | PZA0296 | 10 | 33.3  | 26 | 128.399 | 4.9384 | 3.5833 |

---

ents

| ProbF     | Rsqr   | Number of families |                 |       |
|-----------|--------|--------------------|-----------------|-------|
|           |        | Negative Effect    | Positive Effect | Total |
| 8.55E-08  | 0.0115 | 7                  |                 | 7     |
| 1.98E-09  | 0.013  | 1                  | 5               | 6     |
| 5.79E-24  | 0.0247 |                    | 13              | 13    |
| 6.27E-06  | 0.0098 | 1                  | 5               | 6     |
| 1.32E-05  | 0.0095 | 5                  | 1               | 6     |
| 8.16E-08  | 0.0115 | 7                  | 1               | 8     |
| 6.19E-12  | 0.0151 |                    | 7               | 7     |
| 5.69E-05  | 0.0088 | 2                  | 2               | 4     |
| 6.04E-10  | 0.0134 | 8                  |                 | 8     |
| 4.90E-11  | 0.0144 | 8                  |                 | 8     |
| 2.73E-05  | 0.0092 |                    | 7               | 7     |
| 1.55E-09  | 0.0131 |                    | 5               | 5     |
| 1.86E-12  | 0.0155 |                    | 9               | 9     |
| 8.83E-07  | 0.0106 | 7                  |                 | 7     |
| 8.61E-19  | 0.0206 | 14                 |                 | 14    |
| 1.49E-07  | 0.0113 | 8                  |                 | 8     |
| 3.67E-05  | 0.009  | 1                  | 5               | 6     |
| 2.68E-06  | 0.0101 |                    | 6               | 6     |
| 3.56E-07  | 0.0108 | 8                  | 1               | 9     |
| 8.69E-07  | 0.0105 |                    | 7               | 7     |
| 3.01E-05  | 0.009  |                    | 6               | 6     |
| 1.17E-18  | 0.0203 | 13                 |                 | 13    |
| 7.37E-09  | 0.0123 | 7                  |                 | 7     |
| 3.01E-09  | 0.0127 | 8                  |                 | 8     |
| 2.21E-07  | 0.011  |                    | 7               | 7     |
| 4.17E-09  | 0.0135 |                    | 2               | 2     |
| 7.46E-08  | 0.0123 | 2                  | 1               | 3     |
| 6.36E-13  | 0.0145 |                    | 2               | 2     |
| 2.10E-136 | 0.1116 | 1                  | 2               | 3     |
| 1.03E-08  | 0.0129 | 1                  | 4               | 5     |
| 3.48E-05  | 0.0096 | 1                  | 7               | 8     |
| 1.05E-05  | 0.0102 |                    | 6               | 6     |
| 8.51E-22  | 0.022  | 1                  | 3               | 4     |
| 2.31E-15  | 0.0181 | 1                  | 1               | 2     |
| 5.76E-08  | 0.0122 | 4                  | 1               | 5     |
| 2.50E-06  | 0.0106 | 3                  | 3               | 6     |
| 0.000153  | 0.0088 | 1                  | 4               | 5     |
| 3.30E-05  | 0.0095 | 2                  | 4               | 6     |
| 5.71E-13  | 0.0167 | 10                 |                 | 10    |
| 3.52E-05  | 0.0094 | 3                  |                 | 3     |
| 1.04E-05  | 0.01   | 3                  |                 | 3     |

|          |        |   |   |    |
|----------|--------|---|---|----|
| 7.41E-05 | 0.0104 | 3 | 1 | 4  |
| 0.003142 | 0.0083 | 2 | 3 | 5  |
| 0.006278 | 0.0079 | 3 | 1 | 4  |
| 0.000361 | 0.0095 | 4 | 1 | 5  |
| 7.97E-05 | 0.0104 | 3 | 4 | 7  |
| 0.002641 | 0.0084 | 2 | 1 | 3  |
| 3.80E-07 | 0.013  | 7 | 1 | 8  |
| 0.000258 | 0.0097 | 1 | 6 | 7  |
| 0.007151 | 0.0078 | 3 | 1 | 4  |
| 0.000198 | 0.0099 | 2 | 4 | 6  |
| 0.000801 | 0.0091 |   | 3 | 3  |
| 0.000102 | 0.0102 | 1 | 4 | 5  |
| 4.30E-05 | 0.0107 | 2 | 3 | 5  |
| 0.002393 | 0.0085 | 2 | 2 | 4  |
| 0.001322 | 0.0088 | 1 | 4 | 5  |
| 1.56E-05 | 0.0096 | 5 |   | 5  |
| 0.000141 | 0.0086 | 2 | 4 | 6  |
| 8.20E-06 | 0.0099 | 5 |   | 5  |
| 1.87E-05 | 0.0095 | 5 | 1 | 6  |
| 0.000108 | 0.0088 | 2 | 4 | 6  |
| 3.04E-05 | 0.0093 | 6 |   | 6  |
| 4.46E-07 | 0.0111 | 6 | 1 | 7  |
| 3.60E-09 | 0.013  | 4 | 1 | 5  |
| 1.14E-08 | 0.0126 | 4 | 3 | 7  |
| 2.19E-08 | 0.0123 | 9 | 1 | 10 |
| 3.40E-07 | 0.0112 | 4 | 6 | 10 |
| 2.20E-05 | 0.0095 | 2 | 3 | 5  |
| 8.48E-09 | 0.0127 | 3 | 5 | 8  |
| 1.04E-05 | 0.0107 |   | 6 | 6  |
| 2.05E-05 | 0.0104 |   | 5 | 5  |
| 1.27E-09 | 0.0147 | 7 |   | 7  |
| 0.000195 | 0.0093 |   | 5 | 5  |
| 1.67E-05 | 0.0105 | 1 | 5 | 6  |
| 4.06E-06 | 0.0112 | 1 | 6 | 7  |
| 6.70E-09 | 0.014  |   | 9 | 9  |
| 7.68E-07 | 0.0101 | 1 | 6 | 7  |
| 4.58E-09 | 0.012  | 1 | 7 | 8  |
| 8.30E-06 | 0.0092 | 7 | 3 | 10 |
| 8.41E-09 | 0.0118 |   | 7 | 7  |
| 2.79E-05 | 0.0087 | 7 | 1 | 8  |
| 0.00013  | 0.008  | 3 | 1 | 4  |
| 9.64E-06 | 0.0091 | 1 | 7 | 8  |
| 1.34E-11 | 0.0141 |   | 8 | 8  |
| 1.05E-09 | 0.0125 |   | 8 | 8  |
| 0.000104 | 0.0076 | 1 | 2 | 3  |

|          |        |    |   |    |
|----------|--------|----|---|----|
| 5.88E-10 | 0.0119 |    | 6 | 6  |
| 1.60E-09 | 0.0111 | 2  | 1 | 3  |
| 6.88E-14 | 0.0146 |    | 2 | 2  |
| 1.32E-13 | 0.0146 | 2  |   | 2  |
| 2.45E-61 | 0.0466 | 1  | 2 | 3  |
| 5.55E-07 | 0.0096 | 3  |   | 3  |
| 7.40E-06 | 0.0091 | 8  | 1 | 9  |
| 6.54E-05 | 0.0082 | 6  |   | 6  |
| 3.57E-08 | 0.0111 | 7  |   | 7  |
| 6.75E-05 | 0.0082 | 4  |   | 4  |
| 5.49E-06 | 0.0092 | 4  | 4 | 8  |
| 1.81E-09 | 0.0122 | 10 |   | 10 |
| 3.77E-05 | 0.0085 | 2  | 4 | 6  |
| 1.37E-06 | 0.0082 | 5  | 1 | 6  |
| 1.19E-10 | 0.0111 | 1  | 3 | 4  |
| 5.60E-06 | 0.0078 | 5  |   | 5  |
| 1.59E-06 | 0.0082 | 6  |   | 6  |
| 9.53E-18 | 0.0156 | 9  |   | 9  |
| 3.27E-14 | 0.0134 | 5  | 2 | 7  |
| 0.000136 | 0.0067 | 5  |   | 5  |
| 2.21E-13 | 0.0129 | 3  | 7 | 10 |
| 5.34E-08 | 0.0092 |    | 7 | 7  |
| 3.68E-07 | 0.0086 | 6  |   | 6  |
| 1.00E-07 | 0.009  | 3  | 3 | 6  |
| 9.77E-11 | 0.0111 |    | 6 | 6  |
| 2.48E-05 | 0.0073 | 5  |   | 5  |
| 7.84E-13 | 0.0125 | 3  | 5 | 8  |
| 2.60E-06 | 0.0076 | 6  |   | 6  |
| 3.09E-06 | 0.0076 | 2  | 5 | 7  |
| 1.55E-05 | 0.007  | 6  |   | 6  |
| 2.56E-06 | 0.0076 | 5  |   | 5  |
| 2.27E-06 | 0.0076 |    | 4 | 4  |
| 2.89E-09 | 0.0163 | 9  |   | 9  |
| 3.45E-14 | 0.0215 |    | 8 | 8  |
| 1.25E-06 | 0.0133 | 7  |   | 7  |
| 1.29E-05 | 0.012  |    | 6 | 6  |
| 2.10E-07 | 0.0142 | 8  | 2 | 10 |
| 4.96E-05 | 0.0113 | 1  | 4 | 5  |
| 4.32E-06 | 0.0126 | 2  | 5 | 7  |
| 2.94E-12 | 0.0195 | 7  |   | 7  |
| 2.37E-06 | 0.0093 |    | 7 | 7  |
| 1.44E-09 | 0.012  | 7  |   | 7  |
| 0.000197 | 0.0076 | 2  | 4 | 6  |
| 4.95E-07 | 0.0099 |    | 6 | 6  |
| 6.00E-10 | 0.0123 | 1  | 9 | 10 |

|          |        |   |    |    |
|----------|--------|---|----|----|
| 1.76E-05 | 0.0086 |   | 6  | 6  |
| 3.18E-07 | 0.0101 | 4 | 2  | 6  |
| 8.02E-07 | 0.0097 | 3 | 2  | 5  |
| 3.82E-08 | 0.0108 | 4 | 1  | 5  |
| 2.32E-06 | 0.0093 | 1 | 3  | 4  |
| 5.11E-17 | 0.0176 |   | 15 | 15 |
| 1.18E-05 | 0.0087 | 3 | 1  | 4  |
| 8.96E-05 | 0.0079 | 4 | 1  | 5  |
| 2.28E-09 | 0.0118 | 3 | 2  | 5  |

---
