# Supplementary material
Source: PubMed Central journal article supplement (PMC4453775)
Supplement: supp_pp.15.00025_00025supptbl5.pdf [file supp_pp.15.00025_00025supptbl5.pdf]

**Table S5.** Maize carbon and nitrogen metabolism related priori candidates and the annotationsMapMan annotation (16) (<http://mapman.gabipd.org/web/guest.jsessionid=6F668C7FEAD5974C806D217A3560ED>)

| <b>Gene ID</b> | <b>Chr</b> | <b>Physical position<br/>(AGPv1) start</b> | <b>Physical<br/>position<br/>(AGPv1) end</b> | <b>Bincode</b> | <b>Category</b>                                             |
|----------------|------------|--------------------------------------------|----------------------------------------------|----------------|-------------------------------------------------------------|
| GRMZM2G062044  | 3          | 176635252                                  | 176635809                                    | '1.1.1.2'      | 'PS.lightreaction.photosystem II.PSII polypeptide subunits' |
| GRMZM2G108467  | 10         | 90230853                                   | 90233028                                     | '1.1.1.2'      | 'PS.lightreaction.photosystem II.PSII polypeptide subunits' |
| GRMZM2G117572  | 2          | 197154929                                  | 197157201                                    | '1.1.1.2'      | 'PS.lightreaction.photosystem II.PSII polypeptide subunits' |
| GRMZM2G125575  | 4          | 62093645                                   | 62095382                                     | '1.1.1.2'      | 'PS.lightreaction.photosystem II.PSII polypeptide subunits' |
| GRMZM2G134130  | 6          | 6262633                                    | 6263643                                      | '1.1.1.2'      | 'PS.lightreaction.photosystem II.PSII polypeptide subunits' |
| GRMZM2G433927  | 2          | 106512153                                  | 106522147                                    | '1.1.1.2'      | 'PS.lightreaction.photosystem II.PSII polypeptide subunits' |

|               |    |           |           |           |                                                                                  |
|---------------|----|-----------|-----------|-----------|----------------------------------------------------------------------------------|
| GRMZM2G059083 | 3  | 143463610 | 143469794 | '1.1.5.3' | 'PS.lightreaction.other<br>electron carrier<br>(ox/red).ferredoxin<br>reductase' |
| GRMZM2G059191 | 8  | 156141696 | 156145324 | '1.1.5.3' | 'PS.lightreaction.other<br>electron carrier<br>(ox/red).ferredoxin<br>reductase' |
| GRMZM2G168143 | 9  | 26960159  | 26962547  | '1.1.5.3' | 'PS.lightreaction.other<br>electron carrier<br>(ox/red).ferredoxin<br>reductase' |
| GRMZM2G320305 | 10 | 2176056   | 2180138   | '1.1.5.3' | 'PS.lightreaction.other<br>electron carrier<br>(ox/red).ferredoxin<br>reductase' |
| GRMZM2G395728 | 1  | 277938263 | 277941932 | '1.1.5.3' | 'PS.lightreaction.other<br>electron carrier<br>(ox/red).ferredoxin<br>reductase' |
| GRMZM2G057171 | 4  | 155848284 | 155849738 | '1.3.1'   | 'PS.calvin cycle.rubisco<br>large subunit'                                       |
| GRMZM2G083364 | 1  | 206925826 | 206926402 | '1.3.1'   | 'PS.calvin cycle.rubisco<br>large subunit'                                       |
| GRMZM2G122563 | 6  | 124162799 | 124163522 | '1.3.1'   | 'PS.calvin cycle.rubisco<br>large subunit'                                       |

|               |   |           |           |          |                                            |
|---------------|---|-----------|-----------|----------|--------------------------------------------|
| GRMZM2G308907 | 9 | 32423081  | 32423998  | '1.3.1'  | 'PS.calvin cycle.rubisco<br>large subunit' |
| GRMZM2G360821 | 6 | 160909590 | 160911677 | '1.3.1'  | 'PS.calvin cycle.rubisco<br>large subunit' |
| GRMZM2G385635 | 2 | 197200874 | 197205149 | '1.3.1'  | 'PS.calvin cycle.rubisco<br>large subunit' |
| GRMZM2G448344 | 1 | 203364152 | 203369630 | '1.3.1'  | 'PS.calvin cycle.rubisco<br>large subunit' |
| GRMZM2G026807 | 1 | 14563890  | 14579039  | '1.3.11' | 'PS.calvin cycle.RPE'                      |
| GRMZM2G178960 | 9 | 146967883 | 146971758 | '1.3.11' | 'PS.calvin cycle.RPE'                      |
| GRMZM2G026024 | 4 | 158046630 | 158049548 | '1.3.12' | 'PS.calvin cycle.PRK'                      |
| GRMZM2G162529 | 5 | 198744538 | 198746868 | '1.3.12' | 'PS.calvin cycle.PRK'                      |
| GRMZM2G463280 | 2 | 12798094  | 12800411  | '1.3.12' | 'PS.calvin cycle.PRK'                      |

|               |    |           |           |         |                                                 |
|---------------|----|-----------|-----------|---------|-------------------------------------------------|
| GRMZM2G098520 | 4  | 195758576 | 195761059 | '1.3.2' | 'PS.calvin cycle.rubisco<br>small subunit'      |
| GRMZM2G113033 | 2  | 140014260 | 140015449 | '1.3.2' | 'PS.calvin cycle.rubisco<br>small subunit'      |
| GRMZM2G003724 | 1  | 236749045 | 236778245 | '1.3.3' | 'PS.calvin<br>cycle.phosphoglycerate<br>kinase' |
| GRMZM2G047028 | 3  | 186579101 | 186585753 | '1.3.3' | 'PS.calvin<br>cycle.phosphoglycerate<br>kinase' |
| GRMZM2G083016 | 8  | 119381025 | 119386023 | '1.3.3' | 'PS.calvin<br>cycle.phosphoglycerate<br>kinase' |
| GRMZM2G089136 | 6  | 156407963 | 156411398 | '1.3.3' | 'PS.calvin<br>cycle.phosphoglycerate<br>kinase' |
| GRMZM2G382914 | 5  | 84109752  | 84113884  | '1.3.3' | 'PS.calvin<br>cycle.phosphoglycerate<br>kinase' |
| GRMZM2G035268 | 4  | 91417249  | 91422437  | '1.3.4' | 'PS.calvin cycle.GAP'                           |
| GRMZM2G039723 | 10 | 122103120 | 122104940 | '1.3.4' | 'PS.calvin cycle.GAP'                           |

|               |    |           |                   |                            |
|---------------|----|-----------|-------------------|----------------------------|
| GRMZM2G162845 | 10 | 122233671 | 122235459 '1.3.4' | 'PS.calvin cycle.GAP'      |
| GRMZM2G337113 | 2  | 42721869  | 42724242 '1.3.4'  | 'PS.calvin cycle.GAP'      |
| GRMZM2G002807 | 2  | 193007843 | 193011720 '1.3.5' | 'PS.calvin cycle.TPI'      |
| GRMZM2G046284 | 10 | 9746263   | 9748211 '1.3.6'   | 'PS.calvin cycle.aldolase' |
| GRMZM2G069195 | 8  | 9996842   | 10000671 '1.3.6'  | 'PS.calvin cycle.aldolase' |
| GRMZM2G089365 | 3  | 27037073  | 27040771 '1.3.6'  | 'PS.calvin cycle.aldolase' |
| GRMZM2G155253 | 4  | 210234914 | 210235873 '1.3.6' | 'PS.calvin cycle.aldolase' |
| GRMZM2G407406 | 5  | 144273766 | 144276560 '1.3.6' | 'PS.calvin cycle.aldolase' |
| GRMZM2G306732 | 1  | 38917806  | 38919996 '1.3.7'  | 'PS.calvin cycle.FBPase'   |

|                  |   |           |           |         |                                                      |
|------------------|---|-----------|-----------|---------|------------------------------------------------------|
| GRMZM2G322953    | 8 | 99674462  | 99678513  | '1.3.7' | 'PS.calvin cycle.FBPase'                             |
| GRMZM2G010494    | 3 | 154398189 | 154401921 | '1.3.8' | 'PS.calvin<br>cycle.transketolase'                   |
| GRMZM2G033208    | 9 | 22732320  | 22736794  | '1.3.8' | 'PS.calvin<br>cycle.transketolase'                   |
| AC147602.5_FG004 | 3 | 177072769 | 177074234 | '1.3.9' | 'PS.calvin<br>cycle.seduheptulose<br>bisphosphatase' |
| GRMZM2G069542    | 5 | 144071877 | 144079476 | '1.5.1' | 'PS.carbon concentrating<br>mechanism.C4'            |
| GRMZM2G074122    | 4 | 232871577 | 232882863 | '1.5.1' | 'PS.carbon concentrating<br>mechanism.C4'            |
| GRMZM2G082780    | 3 | 28691520  | 28694162  | '1.5.1' | 'PS.carbon concentrating<br>mechanism.C4'            |
| GRMZM2G083841    | 9 | 59744275  | 59750163  | '1.5.1' | 'PS.carbon concentrating<br>mechanism.C4'            |
| GRMZM2G085019    | 3 | 7081671   | 7087021   | '1.5.1' | 'PS.carbon concentrating<br>mechanism.C4'            |

|               |   |           |           |         |                                        |
|---------------|---|-----------|-----------|---------|----------------------------------------|
| GRMZM2G085747 | 5 | 23759991  | 23766893  | '1.5.1' | 'PS.carbon concentrating mechanism.C4' |
| GRMZM2G097457 | 8 | 105705465 | 105716361 | '1.5.1' | 'PS.carbon concentrating mechanism.C4' |
| GRMZM2G110714 | 8 | 172460967 | 172473888 | '1.5.1' | 'PS.carbon concentrating mechanism.C4' |
| GRMZM2G118770 | 8 | 173788781 | 173793322 | '1.5.1' | 'PS.carbon concentrating mechanism.C4' |
| GRMZM2G121878 | 3 | 213888899 | 213896251 | '1.5.1' | 'PS.carbon concentrating mechanism.C4' |
| GRMZM2G122479 | 6 | 139450513 | 139456198 | '1.5.1' | 'PS.carbon concentrating mechanism.C4' |
| GRMZM2G159724 | 3 | 199885864 | 199890948 | '1.5.1' | 'PS.carbon concentrating mechanism.C4' |
| GRMZM2G348512 | 3 | 213847057 | 213859958 | '1.5.1' | 'PS.carbon concentrating mechanism.C4' |
| GRMZM2G406672 | 7 | 144685470 | 144695685 | '1.5.1' | 'PS.carbon concentrating mechanism.C4' |

|                  |   |           |           |           |                                              |
|------------------|---|-----------|-----------|-----------|----------------------------------------------|
| GRMZM2G461332    | 1 | 282407461 | 282409312 | '1.5.1'   | 'PS.carbon concentrating mechanism.C4'       |
| GRMZM2G473001    | 7 | 75484741  | 75490481  | '1.5.1'   | 'PS.carbon concentrating mechanism.C4'       |
| AC226723.2_FG001 | 6 | 102225242 | 102229211 | '1.5.1'   | 'PS.carbon concentrating mechanism.C4'       |
| GRMZM2G008507    | 4 | 10453240  | 10459179  | '2.1.1.1' | 'major CHO metabolism.synthesis.sucrose.SPS' |
| GRMZM2G049076    | 9 | 91391649  | 91410418  | '2.1.1.1' | 'major CHO metabolism.synthesis.sucrose.SPS' |
| GRMZM2G055331    | 4 | 72587772  | 72606368  | '2.1.1.1' | 'major CHO metabolism.synthesis.sucrose.SPS' |
| GRMZM2G140107    | 3 | 159990666 | 159996657 | '2.1.1.1' | 'major CHO metabolism.synthesis.sucrose.SPS' |
| GRMZM2G462613    | 5 | 95633621  | 95641316  | '2.1.1.1' | 'major CHO metabolism.synthesis.sucrose.SPS' |
| GRMZM2G471083    | 6 | 97099643  | 97110587  | '2.1.1.1' | 'major CHO metabolism.synthesis.sucrose.SPS' |



|               |    |           |                     |                                                       |
|---------------|----|-----------|---------------------|-------------------------------------------------------|
| GRMZM2G055489 | 8  | 114949111 | 114955366 '2.1.1.2' | 'major CHO<br>metabolism.synthesis.sucro<br>se.SPP'   |
| GRMZM2G097641 | 10 | 89333835  | 89336960 '2.1.1.2'  | 'major CHO<br>metabolism.synthesis.sucro<br>se.SPP'   |
| GRMZM2G027955 | 6  | 166682879 | 166688486 '2.1.2.1' | 'major CHO<br>metabolism.synthesis.starc<br>h.AGPase' |
| GRMZM2G068506 | 4  | 66286716  | 66292876 '2.1.2.1'  | 'major CHO<br>metabolism.synthesis.starc<br>h.AGPase' |
| GRMZM2G106213 | 2  | 170508555 | 170519479 '2.1.2.1' | 'major CHO<br>metabolism.synthesis.starc<br>h.AGPase' |
| GRMZM2G144002 | 7  | 25987944  | 25998905 '2.1.2.1'  | 'major CHO<br>metabolism.synthesis.starc<br>h.AGPase' |
| GRMZM2G163437 | 1  | 221043882 | 221048475 '2.1.2.1' | 'major CHO<br>metabolism.synthesis.starc<br>h.AGPase' |
| GRMZM2G391936 | 1  | 272463080 | 272467914 '2.1.2.1' | 'major CHO<br>metabolism.synthesis.starc<br>h.AGPase' |

|               |    |           |           |           |                                                                |
|---------------|----|-----------|-----------|-----------|----------------------------------------------------------------|
| GRMZM2G429899 | 3  | 214837669 | 214847033 | '2.1.2.1' | 'major CHO<br>metabolism.synthesis.starc<br>h.AGPase'          |
| GRMZM2G008263 | 7  | 37074030  | 37081289  | '2.1.2.2' | 'major CHO<br>metabolism.synthesis.starc<br>h.starch synthase' |
| GRMZM2G024993 | 9  | 23213761  | 23217689  | '2.1.2.2' | 'major CHO<br>metabolism.synthesis.starc<br>h.starch synthase' |
| GRMZM2G044744 | 8  | 123924441 | 123932986 | '2.1.2.2' | 'major CHO<br>metabolism.synthesis.starc<br>h.starch synthase' |
| GRMZM2G105791 | 5  | 205769894 | 205774893 | '2.1.2.2' | 'major CHO<br>metabolism.synthesis.starc<br>h.starch synthase' |
| GRMZM2G121612 | 10 | 142647341 | 142656379 | '2.1.2.2' | 'major CHO<br>metabolism.synthesis.starc<br>h.starch synthase' |
| GRMZM2G126988 | 5  | 32364622  | 32366243  | '2.1.2.2' | 'major CHO<br>metabolism.synthesis.starc<br>h.starch synthase' |
| GRMZM2G129451 | 9  | 17537935  | 17547474  | '2.1.2.2' | 'major CHO<br>metabolism.synthesis.starc<br>h.starch synthase' |
| GRMZM2G130043 | 4  | 171780270 | 171788690 | '2.1.2.2' | 'major CHO<br>metabolism.synthesis.starc<br>h.starch synthase' |

|               |    |           |                       |                                                                      |
|---------------|----|-----------|-----------------------|----------------------------------------------------------------------|
| GRMZM2G141399 | 10 | 43570189  | 43581767 '2.1.2.2'    | 'major CHO<br>metabolism.synthesis.starc<br>h.starch synthase'       |
| GRMZM2G348551 | 6  | 113380769 | 113385825 '2.1.2.2'   | 'major CHO<br>metabolism.synthesis.starc<br>h.starch synthase'       |
| GRMZM2G005298 | 8  | 140600201 | 140604859 '2.1.2.3'   | 'major CHO<br>metabolism.synthesis.starc<br>h.starch branching'      |
| GRMZM2G032628 | 5  | 167879647 | 167890099 '2.1.2.3'   | 'major CHO<br>metabolism.synthesis.starc<br>h.starch branching'      |
| GRMZM2G073054 | 2  | 58470011  | 58473640 '2.1.2.3'    | 'major CHO<br>metabolism.synthesis.starc<br>h.starch branching'      |
| GRMZM2G088753 | 5  | 62617689  | 62624618 '2.1.2.3'    | 'major CHO<br>metabolism.synthesis.starc<br>h.starch branching'      |
| GRMZM2G090905 | 6  | 144743201 | 144745581 '2.1.2.4'   | 'major CHO<br>metabolism.synthesis.starc<br>h.debranching'           |
| GRMZM2G138060 | 4  | 41189018  | 41197566 '2.1.2.4'    | 'major CHO<br>metabolism.synthesis.starc<br>h.debranching'           |
| GRMZM2G150796 | 7  | 123353332 | 123364923 '2.1.2.4'   | 'major CHO<br>metabolism.synthesis.starc<br>h.debranching'           |
| GRMZM2G051677 | 6  | 3575322   | 3578436 '2.2.1.1'     | 'major CHO<br>metabolism.degradation.su<br>crose.fructokinase'       |
| GRMZM2G007277 | 4  | 210346826 | 210351596 '2.2.1.3.1' | 'major CHO<br>metabolism.degradation.su<br>crose.invertases.neutral' |

|               |    |           |           |             |                                                                        |
|---------------|----|-----------|-----------|-------------|------------------------------------------------------------------------|
| GRMZM2G022782 | 8  | 39924160  | 39928400  | '2.2.1.3.1' | 'major CHO<br>metabolism.degradation.su<br>crose.invertases.neutral'   |
| GRMZM2G040843 | 10 | 11196483  | 11206942  | '2.2.1.3.1' | 'major CHO<br>metabolism.degradation.su<br>crose.invertases.neutral'   |
| GRMZM2G084694 | 3  | 60524343  | 60528210  | '2.2.1.3.1' | 'major CHO<br>metabolism.degradation.su<br>crose.invertases.neutral'   |
| GRMZM2G084940 | 1  | 51434476  | 51440869  | '2.2.1.3.1' | 'major CHO<br>metabolism.degradation.su<br>crose.invertases.neutral'   |
| GRMZM2G115451 | 2  | 132976276 | 132980088 | '2.2.1.3.1' | 'major CHO<br>metabolism.degradation.su<br>crose.invertases.neutral'   |
| GRMZM2G118737 | 5  | 170573207 | 170577262 | '2.2.1.3.1' | 'major CHO<br>metabolism.degradation.su<br>crose.invertases.neutral'   |
| GRMZM2G136139 | 4  | 162536638 | 162539641 | '2.2.1.3.1' | 'major CHO<br>metabolism.degradation.su<br>crose.invertases.neutral'   |
| GRMZM2G170842 | 4  | 113503323 | 113508452 | '2.2.1.3.1' | 'major CHO<br>metabolism.degradation.su<br>crose.invertases.neutral'   |
| GRMZM2G018692 | 2  | 3216441   | 3218852   | '2.2.1.3.2' | 'major CHO<br>metabolism.degradation.su<br>crose.invertases.cell wall' |
| GRMZM2G018716 | 2  | 3212064   | 3214698   | '2.2.1.3.2' | 'major CHO<br>metabolism.degradation.su<br>crose.invertases.cell wall' |
| GRMZM2G089836 | 5  | 66808614  | 66811912  | '2.2.1.3.2' | 'major CHO<br>metabolism.degradation.su<br>crose.invertases.cell wall' |

|               |    |           |                       |                                                                        |
|---------------|----|-----------|-----------------------|------------------------------------------------------------------------|
| GRMZM2G095725 | 10 | 114035376 | 114038496 '2.2.1.3.2' | 'major CHO<br>metabolism.degradation.su<br>crose.invertases.cell wall' |
| GRMZM2G119689 | 2  | 56770929  | 56774210 '2.2.1.3.2'  | 'major CHO<br>metabolism.degradation.su<br>crose.invertases.cell wall' |
| GRMZM2G119941 | 2  | 3172894   | 3176745 '2.2.1.3.2'   | 'major CHO<br>metabolism.degradation.su<br>crose.invertases.cell wall' |
| GRMZM2G123633 | 10 | 114087307 | 114089699 '2.2.1.3.2' | 'major CHO<br>metabolism.degradation.su<br>crose.invertases.cell wall' |
| GRMZM2G139300 | 5  | 168866600 | 168869757 '2.2.1.3.2' | 'major CHO<br>metabolism.degradation.su<br>crose.invertases.cell wall' |
| GRMZM2G139300 | 5  | 168866600 | 168869757 '2.2.1.3.2' | 'major CHO<br>metabolism.degradation.su<br>crose.invertases.cell wall' |
| GRMZM2G174249 | 3  | 141917008 | 141920442 '2.2.1.3.2' | 'major CHO<br>metabolism.degradation.su<br>crose.invertases.cell wall' |
| GRMZM2G394450 | 2  | 22804880  | 22809451 '2.2.1.3.3'  | 'major CHO<br>metabolism.degradation.su<br>crose.invertases.vacuolar'  |
| GRMZM2G463871 | 4  | 246068493 | 246071007 '2.2.1.3.3' | 'major CHO<br>metabolism.degradation.su<br>crose.invertases.vacuolar'  |

|               |   |           |                     |                                                              |
|---------------|---|-----------|---------------------|--------------------------------------------------------------|
| GRMZM2G046686 | 6 | 136141269 | 136146446 '2.2.1.4' | 'major CHO<br>metabolism.degradation.su<br>crose.hexokinase' |
| GRMZM2G051806 | 6 | 130242638 | 130245550 '2.2.1.4' | 'major CHO<br>metabolism.degradation.su<br>crose.hexokinase' |
| GRMZM2G058745 | 8 | 123268317 | 123273802 '2.2.1.4' | 'major CHO<br>metabolism.degradation.su<br>crose.hexokinase' |
| GRMZM2G068913 | 3 | 148353395 | 148359880 '2.2.1.4' | 'major CHO<br>metabolism.degradation.su<br>crose.hexokinase' |
| GRMZM2G104081 | 3 | 6884810   | 6888596 '2.2.1.4'   | 'major CHO<br>metabolism.degradation.su<br>crose.hexokinase' |
| GRMZM2G171373 | 3 | 200000374 | 200010416 '2.2.1.4' | 'major CHO<br>metabolism.degradation.su<br>crose.hexokinase' |
| GRMZM2G432801 | 6 | 160359759 | 160367017 '2.2.1.4' | 'major CHO<br>metabolism.degradation.su<br>crose.hexokinase' |
| GRMZM2G467069 | 8 | 157900762 | 157910330 '2.2.1.4' | 'major CHO<br>metabolism.degradation.su<br>crose.hexokinase' |
| GRMZM2G045171 | 4 | 167833903 | 167837431 '2.2.1.5' | 'major CHO<br>metabolism.degradation.su<br>crose.Susy'       |
| GRMZM2G060659 | 5 | 64068518  | 64072884 '2.2.1.5'  | 'major CHO<br>metabolism.degradation.su<br>crose.Susy'       |
| GRMZM2G089713 | 9 | 11336707  | 11343468 '2.2.1.5'  | 'major CHO<br>metabolism.degradation.su<br>crose.Susy'       |

|               |    |           |                     |                                                                  |
|---------------|----|-----------|---------------------|------------------------------------------------------------------|
| GRMZM2G152908 | 9  | 117891216 | 117897889 '2.2.1.5' | 'major CHO<br>metabolism.degradation.su<br>crose.Susy'           |
| GRMZM2G311182 | 1  | 56855835  | 56859646 '2.2.1.5'  | 'major CHO<br>metabolism.degradation.su<br>crose.Susy'           |
| GRMZM2G318780 | 1  | 56884526  | 56891725 '2.2.1.5'  | 'major CHO<br>metabolism.degradation.su<br>crose.Susy'           |
| GRMZM2G007939 | 1  | 89607428  | 89611067 '2.2.2.1'  | 'major CHO<br>metabolism.degradation.sta<br>rch.starch cleavage' |
| GRMZM2G025833 | 5  | 30088994  | 30091412 '2.2.2.1'  | 'major CHO<br>metabolism.degradation.sta<br>rch.starch cleavage' |
| GRMZM2G033339 | 10 | 117515762 | 117516625 '2.2.2.1' | 'major CHO<br>metabolism.degradation.sta<br>rch.starch cleavage' |
| GRMZM2G034575 | 9  | 142109937 | 142116442 '2.2.2.1' | 'major CHO<br>metabolism.degradation.sta<br>rch.starch cleavage' |
| GRMZM2G035749 | 9  | 110627095 | 110629975 '2.2.2.1' | 'major CHO<br>metabolism.degradation.sta<br>rch.starch cleavage' |
| GRMZM2G058310 | 7  | 149715593 | 149718793 '2.2.2.1' | 'major CHO<br>metabolism.degradation.sta<br>rch.starch cleavage' |
| GRMZM2G070172 | 1  | 199483190 | 199485177 '2.2.2.1' | 'major CHO<br>metabolism.degradation.sta<br>rch.starch cleavage' |

|               |   |           |           |           |                                                                  |
|---------------|---|-----------|-----------|-----------|------------------------------------------------------------------|
| GRMZM2G074781 | 7 | 99763091  | 99765189  | '2.2.2.1' | 'major CHO<br>metabolism.degradation.sta<br>rch.starch cleavage' |
| GRMZM2G077202 | 8 | 28053020  | 28058030  | '2.2.2.1' | 'major CHO<br>metabolism.degradation.sta<br>rch.starch cleavage' |
| GRMZM2G081502 | 7 | 99772979  | 99774377  | '2.2.2.1' | 'major CHO<br>metabolism.degradation.sta<br>rch.starch cleavage' |
| GRMZM2G082034 | 1 | 60153179  | 60155186  | '2.2.2.1' | 'major CHO<br>metabolism.degradation.sta<br>rch.starch cleavage' |
| GRMZM2G103055 | 5 | 209097206 | 209099282 | '2.2.2.1' | 'major CHO<br>metabolism.degradation.sta<br>rch.starch cleavage' |
| GRMZM2G138468 | 2 | 183356996 | 183358858 | '2.2.2.1' | 'major CHO<br>metabolism.degradation.sta<br>rch.starch cleavage' |
| GRMZM2G163129 | 1 | 27199395  | 27203624  | '2.2.2.1' | 'major CHO<br>metabolism.degradation.sta<br>rch.starch cleavage' |
| GRMZM2G175218 | 3 | 1532910   | 1537185   | '2.2.2.1' | 'major CHO<br>metabolism.degradation.sta<br>rch.starch cleavage' |
| GRMZM2G181284 | 7 | 166151874 | 166154217 | '2.2.2.1' | 'major CHO<br>metabolism.degradation.sta<br>rch.starch cleavage' |
| GRMZM2G422938 | 2 | 60640846  | 60644732  | '2.2.2.1' | 'major CHO<br>metabolism.degradation.sta<br>rch.starch cleavage' |



|               |   |           |           |             |                                                                                  |
|---------------|---|-----------|-----------|-------------|----------------------------------------------------------------------------------|
| GRMZM2G450125 | 1 | 9028311   | 9031292   | '2.2.2.1'   | 'major CHO<br>metabolism.degradation.sta<br>rch.starch cleavage'                 |
| GRMZM2G462258 | 2 | 19172527  | 19174657  | '2.2.2.1'   | 'major CHO<br>metabolism.degradation.sta<br>rch.starch cleavage'                 |
| GRMZM2G069486 | 4 | 244703206 | 244713618 | '2.2.2.1.2' | 'major CHO<br>metabolism.degradation.sta<br>rch.starch cleavage.beta<br>amylase' |
| GRMZM2G446515 | 4 | 57630497  | 57635616  | '2.2.2.1.2' | 'major CHO<br>metabolism.degradation.sta<br>rch.starch cleavage.beta<br>amylase' |
| GRMZM2G074158 | 1 | 277192650 | 277201655 | '2.2.2.2'   | 'major CHO<br>metabolism.degradation.sta<br>rch.starch phosphorylase'            |
| GRMZM2G085577 | 3 | 177229789 | 177233918 | '2.2.2.2'   | 'major CHO<br>metabolism.degradation.sta<br>rch.starch phosphorylase'            |
| GRMZM2G013811 | 7 | 161509616 | 161521099 | '2.2.2.4'   | 'major CHO<br>metabolism.degradation.sta<br>rch.D enzyme'                        |
| GRMZM2G057823 | 3 | 164152594 | 164155205 | '4.1.10'    | 'glycolysis.cytosolic<br>branch.aldolase'                                        |
| GRMZM2G066024 | 8 | 162011029 | 162013742 | '4.1.10'    | 'glycolysis.cytosolic<br>branch.aldolase'                                        |
| GRMZM2G003385 | 3 | 184119847 | 184124557 | '4.1.12'    | 'glycolysis.cytosolic<br>branch.phosphoglycerate<br>mutase'                      |

|               |    |           |                    |                                                             |
|---------------|----|-----------|--------------------|-------------------------------------------------------------|
| GRMZM2G050077 | 1  | 54636161  | 54639002 '4.1.12'  | 'glycolysis.cytosolic<br>branch.phosphoglycerate<br>mutase' |
| GRMZM2G054250 | 10 | 25554015  | 25557109 '4.1.12'  | 'glycolysis.cytosolic<br>branch.phosphoglycerate<br>mutase' |
| GRMZM2G146778 | 6  | 123886106 | 123902055 '4.1.12' | 'glycolysis.cytosolic<br>branch.phosphoglycerate<br>mutase' |
| GRMZM2G334628 | 3  | 14968978  | 14978926 '4.1.12'  | 'glycolysis.cytosolic<br>branch.phosphoglycerate<br>mutase' |
| GRMZM2G048371 | 1  | 123934984 | 123941924 '4.1.13' | 'glycolysis.cytosolic<br>branch.enolase'                    |
| GRMZM2G064302 | 9  | 22038338  | 22043026 '4.1.13'  | 'glycolysis.cytosolic<br>branch.enolase'                    |
| GRMZM2G131539 | 9  | 136058804 | 136064699 '4.1.13' | 'glycolysis.cytosolic<br>branch.enolase'                    |
| GRMZM2G446253 | 6  | 67052370  | 67056221 '4.1.13'  | 'glycolysis.cytosolic<br>branch.enolase'                    |
| GRMZM2G481529 | 1  | 38690909  | 38694855 '4.1.13'  | 'glycolysis.cytosolic<br>branch.enolase'                    |
| GRMZM2G003883 | 3  | 43867751  | 43873291 '4.1.14'  | 'glycolysis.cytosolic<br>branch.pyruvate kinase<br>(PK)'    |

|               |    |           |           |          |                                                                                       |
|---------------|----|-----------|-----------|----------|---------------------------------------------------------------------------------------|
| GRMZM2G004534 | 10 | 4219852   | 4224759   | '4.1.14' | 'glycolysis.cytosolic<br>branch.pyruvate kinase<br>(PK)'                              |
| GRMZM2G008714 | 10 | 147754740 | 147759198 | '4.1.14' | 'glycolysis.cytosolic<br>branch.pyruvate kinase<br>(PK)'                              |
| GRMZM2G119175 | 4  | 193590090 | 193596038 | '4.1.14' | 'glycolysis.cytosolic<br>branch.pyruvate kinase<br>(PK)'                              |
| GRMZM2G124593 | 4  | 12914620  | 12923769  | '4.1.14' | 'glycolysis.cytosolic<br>branch.pyruvate kinase<br>(PK)'                              |
| GRMZM2G150098 | 2  | 1611586   | 1615673   | '4.1.14' | 'glycolysis.cytosolic<br>branch.pyruvate kinase<br>(PK)'                              |
| GRMZM2G023289 | 1  | 266953595 | 266960373 | '4.1.2'  | 'glycolysis.cytosolic<br>branch.phosphoglucomutas<br>e (PGM)'                         |
| GRMZM2G109383 | 5  | 10810133  | 10816262  | '4.1.2'  | 'glycolysis.cytosolic<br>branch.phosphoglucomutas<br>e (PGM)'                         |
| GRMZM2G162078 | 5  | 54710484  | 54716463  | '4.1.3'  | 'glycolysis.cytosolic<br>branch.glucose-6-<br>phosphate isomerase'                    |
| GRMZM2G042502 | 4  | 161166295 | 161172650 | '4.1.5'  | 'glycolysis.cytosolic<br>branch.pyrophosphate-<br>fructose-6-P<br>phosphotransferase' |

|               |   |           |                   |                                                                                       |
|---------------|---|-----------|-------------------|---------------------------------------------------------------------------------------|
| GRMZM2G059151 | 6 | 115343210 | 115349610 '4.1.5' | 'glycolysis.cytosolic<br>branch.pyrophosphate-<br>fructose-6-P<br>phosphotransferase' |
| GRMZM2G123371 | 5 | 201709349 | 201716521 '4.1.5' | 'glycolysis.cytosolic<br>branch.pyrophosphate-<br>fructose-6-P<br>phosphotransferase' |
| GRMZM2G143862 | 9 | 1630555   | 1635350 '4.1.5'   | 'glycolysis.cytosolic<br>branch.pyrophosphate-<br>fructose-6-P<br>phosphotransferase' |
| GRMZM2G314094 | 9 | 45350151  | 45353197 '4.1.5'  | 'glycolysis.cytosolic<br>branch.pyrophosphate-<br>fructose-6-P<br>phosphotransferase' |
| GRMZM2G402211 | 8 | 20572092  | 20575740 '4.1.5'  | 'glycolysis.cytosolic<br>branch.pyrophosphate-<br>fructose-6-P<br>phosphotransferase' |
| GRMZM2G409131 | 7 | 71389323  | 71394350 '4.1.5'  | 'glycolysis.cytosolic<br>branch.pyrophosphate-<br>fructose-6-P<br>phosphotransferase' |
| GRMZM2G413226 | 4 | 98552125  | 98560428 '4.1.5'  | 'glycolysis.cytosolic<br>branch.pyrophosphate-<br>fructose-6-P<br>phosphotransferase' |

|                  |   |           |                   |                                                                                       |
|------------------|---|-----------|-------------------|---------------------------------------------------------------------------------------|
| GRMZM2G450163    | 1 | 221135223 | 221139412 '4.1.5' | 'glycolysis.cytosolic<br>branch.pyrophosphate-<br>fructose-6-P<br>phosphotransferase' |
| AC194439.3_FG002 | 8 | 84211227  | 84214198 '4.1.5'  | 'glycolysis.cytosolic<br>branch.pyrophosphate-<br>fructose-6-P<br>phosphotransferase' |
| AC205100.3_FG001 | 1 | 35192911  | 35198202 '4.1.5'  | 'glycolysis.cytosolic<br>branch.pyrophosphate-<br>fructose-6-P<br>phosphotransferase' |
| GRMZM2G018177    | 8 | 14444342  | 14448528 '4.1.7'  | 'glycolysis.cytosolic<br>branch.triosephosphate<br>isomerase (TPI)'                   |
| GRMZM2G026182    | 3 | 40809281  | 40838367 '4.1.7'  | 'glycolysis.cytosolic<br>branch.triosephosphate<br>isomerase (TPI)'                   |
| GRMZM2G030784    | 3 | 17551351  | 17555632 '4.1.7'  | 'glycolysis.cytosolic<br>branch.triosephosphate<br>isomerase (TPI)'                   |
| GRMZM2G146206    | 8 | 167524351 | 167528553 '4.1.7' | 'glycolysis.cytosolic<br>branch.triosephosphate<br>isomerase (TPI)'                   |
| GRMZM2G346168    | 7 | 12287819  | 12313803 '4.1.7'  | 'glycolysis.cytosolic<br>branch.triosephosphate<br>isomerase (TPI)'                   |

|               |   |           |           |         |                                                                                           |
|---------------|---|-----------|-----------|---------|-------------------------------------------------------------------------------------------|
| GRMZM2G370275 | 1 | 289976562 | 289978656 | '4.1.7' | 'glycolysis.cytosolic<br>branch.triosephosphate<br>isomerase (TPI)'                       |
| GRMZM2G419024 | 1 | 201233828 | 201238537 | '4.1.7' | 'glycolysis.cytosolic<br>branch.triosephosphate<br>isomerase (TPI)'                       |
| GRMZM2G435244 | 1 | 109959671 | 109963800 | '4.1.7' | 'glycolysis.cytosolic<br>branch.triosephosphate<br>isomerase (TPI)'                       |
| GRMZM2G439389 | 8 | 81412518  | 81428064  | '4.1.7' | 'glycolysis.cytosolic<br>branch.triosephosphate<br>isomerase (TPI)'                       |
| GRMZM2G046804 | 4 | 36717001  | 36721786  | '4.1.8' | 'glycolysis.cytosolic<br>branch.glyceraldehyde 3-<br>phosphate dehydrogenase<br>(GAP-DH)' |
| GRMZM2G051004 | 4 | 241695151 | 241700161 | '4.1.8' | 'glycolysis.cytosolic<br>branch.glyceraldehyde 3-<br>phosphate dehydrogenase<br>(GAP-DH)' |
| GRMZM2G071630 | 4 | 132040520 | 132043909 | '4.1.8' | 'glycolysis.cytosolic<br>branch.glyceraldehyde 3-<br>phosphate dehydrogenase<br>(GAP-DH)' |
| GRMZM2G104632 | 5 | 84543365  | 84545918  | '4.1.8' | 'glycolysis.cytosolic<br>branch.glyceraldehyde 3-<br>phosphate dehydrogenase<br>(GAP-DH)' |

|               |   |           |                    |                                                                                           |
|---------------|---|-----------|--------------------|-------------------------------------------------------------------------------------------|
| GRMZM2G176307 | 5 | 180736286 | 180741078 '4.1.8'  | 'glycolysis.cytosolic<br>branch.glyceraldehyde 3-<br>phosphate dehydrogenase<br>(GAP-DH)' |
| GRMZM2G180625 | 6 | 6902668   | 6907126 '4.1.8'    | 'glycolysis.cytosolic<br>branch.glyceraldehyde 3-<br>phosphate dehydrogenase<br>(GAP-DH)' |
| GRMZM2G435438 | 5 | 125000366 | 125006459 '4.1.8'  | 'glycolysis.cytosolic<br>branch.glyceraldehyde 3-<br>phosphate dehydrogenase<br>(GAP-DH)' |
| GRMZM2G462894 | 5 | 151742477 | 151747309 '4.1.8'  | 'glycolysis.cytosolic<br>branch.glyceraldehyde 3-<br>phosphate dehydrogenase<br>(GAP-DH)' |
| GRMZM2G033526 | 1 | 96541061  | 96546702 '4.2.14'  | 'glycolysis.plastid<br>branch.pyruvate kinase<br>(PK)'                                    |
| GRMZM2G066290 | 7 | 10401302  | 10405630 '4.2.14'  | 'glycolysis.plastid<br>branch.pyruvate kinase<br>(PK)'                                    |
| GRMZM2G078200 | 1 | 286836678 | 286841037 '4.2.14' | 'glycolysis.plastid<br>branch.pyruvate kinase<br>(PK)'                                    |
| GRMZM2G144730 | 9 | 109959812 | 109965235 '4.2.14' | 'glycolysis.plastid<br>branch.pyruvate kinase<br>(PK)'                                    |
| GRMZM2G152686 | 3 | 210418332 | 210428410 '4.2.14' | 'glycolysis.plastid<br>branch.pyruvate kinase<br>(PK)'                                    |

|               |   |           |           |          |                                                                     |
|---------------|---|-----------|-----------|----------|---------------------------------------------------------------------|
| GRMZM2G177947 | 1 | 256542998 | 256548128 | '4.2.14' | 'glycolysis.plastid<br>branch.pyruvate kinase<br>(PK)'              |
| GRMZM2G067908 | 7 | 67848870  | 67851654  | '4.2.2'  | 'glycolysis.plastid<br>branch.phosphoglucomutase<br>(PGM)'          |
| GRMZM2G009591 | 1 | 242185184 | 242190138 | '4.2.4'  | 'glycolysis.plastid<br>branch.phosphofruktokinase<br>(PFK)'         |
| GRMZM2G080375 | 8 | 20732784  | 20736537  | '4.2.4'  | 'glycolysis.plastid<br>branch.phosphofruktokinase<br>(PFK)'         |
| GRMZM2G139360 | 1 | 211900859 | 211905604 | '4.2.4'  | 'glycolysis.plastid<br>branch.phosphofruktokinase<br>(PFK)'         |
| GRMZM2G168716 | 3 | 108475025 | 108479334 | '4.2.4'  | 'glycolysis.plastid<br>branch.phosphofruktokinase<br>(PFK)'         |
| GRMZM2G032003 | 7 | 140914419 | 140921311 | '4.3.1'  | 'glycolysis.unclear/dually<br>targeted.UGPase'                      |
| GRMZM2G098370 | 5 | 69388731  | 69393204  | '4.3.1'  | 'glycolysis.unclear/dually<br>targeted.UGPase'                      |
| GRMZM2G025854 | 3 | 216693836 | 216702168 | '4.3.2'  | 'glycolysis.unclear/dually<br>targeted.phosphoglucomutase<br>(PGM)' |
| GRMZM2G069676 | 7 | 43936183  | 43948640  | '4.3.2'  | 'glycolysis.unclear/dually<br>targeted.phosphoglucomutase<br>(PGM)' |
| GRMZM2G173668 | 5 | 149061676 | 149062897 | '4.3.2'  | 'glycolysis.unclear/dually<br>targeted.phosphoglucomutase<br>(PGM)' |



|               |   |           |                   |                                                                                    |
|---------------|---|-----------|-------------------|------------------------------------------------------------------------------------|
| GRMZM2G076075 | 2 | 184506321 | 184510607 '4.3.3' | 'glycolysis.unclear/dually targeted.glucose-6-phosphate isomerase'                 |
| GRMZM2G140614 | 7 | 122111018 | 122115881 '4.3.3' | 'glycolysis.unclear/dually targeted.glucose-6-phosphate isomerase'                 |
| GRMZM2G004932 | 6 | 160156143 | 160161758 '4.3.4' | 'glycolysis.unclear/dually targeted.phosphofruktokinase (PFK)'                     |
| GRMZM2G031613 | 7 | 125310846 | 125320697 '4.3.4' | 'glycolysis.unclear/dually targeted.phosphofruktokinase (PFK)'                     |
| GRMZM2G127717 | 2 | 178209545 | 178219000 '4.3.4' | 'glycolysis.unclear/dually targeted.phosphofruktokinase (PFK)'                     |
| GRMZM2G132069 | 3 | 6597988   | 6601927 '4.3.4'   | 'glycolysis.unclear/dually targeted.phosphofruktokinase (PFK)'                     |
| GRMZM2G401970 | 6 | 132995615 | 132997967 '4.3.4' | 'glycolysis.unclear/dually targeted.phosphofruktokinase (PFK)'                     |
| GRMZM2G443985 | 9 | 19058790  | 19067919 '4.3.4'  | 'glycolysis.unclear/dually targeted.phosphofruktokinase (PFK)'                     |
| GRMZM2G171796 | 6 | 46686689  | 46693962 '4.3.5'  | 'glycolysis.unclear/dually targeted.pyrophosphate-fructose-6-P phosphotransferase' |

|                  |   |           |                 |                                                           |
|------------------|---|-----------|-----------------|-----------------------------------------------------------|
| GRMZM2G128929    | 5 | 66703588  | 66705465 '5.1'  | 'fermentation.LDH'                                        |
| GRMZM2G173192    | 5 | 66773309  | 66774626 '5.1'  | 'fermentation.LDH'                                        |
| GRMZM2G038821    | 8 | 15590953  | 15594513 '5.2'  | 'fermentation.PDC'                                        |
| GRMZM2G434792    | 7 | 168978040 | 168980265 '5.2' | 'fermentation.PDC'                                        |
| AC197705.4_FG001 | 8 | 116734266 | 116736402 '5.2' | 'fermentation.PDC'                                        |
| GRMZM2G098346    | 4 | 13359813  | 13363215 '5.3'  | 'fermentation.ADH'                                        |
| GRMZM2G442658    | 1 | 272983401 | 272987295 '5.3' | 'fermentation.ADH'                                        |
| GRMZM2G135588    | 5 | 148710633 | 148715364 '6.1' | 'gluconeogenese/<br>glyoxylate cycle.citrate<br>synthase' |
| GRMZM2G072744    | 1 | 281559306 | 281562946 '6.3' | 'gluconeogenesis.Malate<br>DH'                            |
| GRMZM2G077415    | 3 | 103804489 | 103807790 '6.3' | 'gluconeogenesis.Malate<br>DH'                            |

|               |   |           |                   |                                                       |
|---------------|---|-----------|-------------------|-------------------------------------------------------|
| GRMZM2G141289 | 7 | 161914039 | 161916233 '6.3'   | 'gluconeogenesis.Malate DH'                           |
| GRMZM2G154595 | 6 | 165724751 | 165729511 '6.3'   | 'gluconeogenesis.Malate DH'                           |
| GRMZM2G161245 | 1 | 212502588 | 212505163 '6.3'   | 'gluconeogenesis.Malate DH'                           |
| GRMZM2G466833 | 3 | 212343118 | 212351804 '6.3'   | 'gluconeogenesis.Malate DH'                           |
| GRMZM2G074454 | 6 | 117984172 | 117989535 '7.1.3' | 'OPP.oxidative PP.6-phosphogluconate dehydrogenase'   |
| GRMZM2G083102 | 7 | 130977753 | 130982022 '7.2.3' | 'OPP.non-reductive PP.ribulose-phosphate 3-epimerase' |
| GRMZM2G035599 | 2 | 142093445 | 142094877 '7.2.4' | 'OPP.non-reductive PP.ribose 5-phosphate isomerase'   |
| GRMZM2G104070 | 1 | 152550931 | 152557103 '7.2.4' | 'OPP.non-reductive PP.ribose 5-phosphate isomerase'   |
| GRMZM2G011858 | 7 | 5100934   | 5106501 '7.3'     | 'OPP.electron transfer'                               |
| GRMZM2G058760 | 1 | 284055864 | 284059465 '7.3'   | 'OPP.electron transfer'                               |

|               |    |           |           |           |                                                   |
|---------------|----|-----------|-----------|-----------|---------------------------------------------------|
| GRMZM2G027627 | 9  | 1439993   | 1444635   | '8.1.1.1' | 'TCA / org.<br>transformation.TCA.pyruvate DH.E1' |
| GRMZM2G033894 | 2  | 107216992 | 107220910 | '8.1.1.1' | 'TCA / org.<br>transformation.TCA.pyruvate DH.E1' |
| GRMZM2G088565 | 1  | 174182364 | 174186545 | '8.1.1.1' | 'TCA / org.<br>transformation.TCA.pyruvate DH.E1' |
| GRMZM2G097226 | 2  | 189650493 | 189656923 | '8.1.1.1' | 'TCA / org.<br>transformation.TCA.pyruvate DH.E1' |
| GRMZM2G127546 | 1  | 251244344 | 251247178 | '8.1.1.1' | 'TCA / org.<br>transformation.TCA.pyruvate DH.E1' |
| GRMZM2G361693 | 4  | 181808924 | 181813688 | '8.1.1.1' | 'TCA / org.<br>transformation.TCA.pyruvate DH.E1' |
| GRMZM2G015132 | 5  | 154884698 | 154892092 | '8.1.1.2' | 'TCA / org.<br>transformation.TCA.pyruvate DH.E2' |
| GRMZM2G036534 | 10 | 11822338  | 11828913  | '8.1.1.2' | 'TCA / org.<br>transformation.TCA.pyruvate DH.E2' |
| GRMZM2G058702 | 1  | 214124644 | 214128934 | '8.1.1.2' | 'TCA / org.<br>transformation.TCA.pyruvate DH.E2' |

|               |   |           |           |           |                                                       |
|---------------|---|-----------|-----------|-----------|-------------------------------------------------------|
| GRMZM2G082664 | 1 | 289228427 | 289231485 | '8.1.1.2' | 'TCA / org.<br>transformation.TCA.pyruva<br>te DH.E2' |
| GRMZM2G117786 | 4 | 89319561  | 89323556  | '8.1.1.2' | 'TCA / org.<br>transformation.TCA.pyruva<br>te DH.E2' |
| GRMZM2G121200 | 7 | 104631012 | 104634016 | '8.1.1.2' | 'TCA / org.<br>transformation.TCA.pyruva<br>te DH.E2' |
| GRMZM2G161969 | 4 | 235775165 | 235779518 | '8.1.1.2' | 'TCA / org.<br>transformation.TCA.pyruva<br>te DH.E2' |
| GRMZM2G165176 | 3 | 135511496 | 135517750 | '8.1.1.2' | 'TCA / org.<br>transformation.TCA.pyruva<br>te DH.E2' |
| GRMZM2G073774 | 8 | 78130845  | 78138150  | '8.1.1.3' | 'TCA / org.<br>transformation.TCA.pyruva<br>te DH.E3' |
| GRMZM2G145595 | 8 | 42283338  | 42291699  | '8.1.1.3' | 'TCA / org.<br>transformation.TCA.pyruva<br>te DH.E3' |
| GRMZM2G152958 | 8 | 78033895  | 78041028  | '8.1.1.3' | 'TCA / org.<br>transformation.TCA.pyruva<br>te DH.E3' |
| GRMZM2G063851 | 5 | 122930790 | 122937429 | '8.1.2'   | 'TCA / org.<br>transformation.TCA.CS'                 |

|               |    |           |                   |                                                  |
|---------------|----|-----------|-------------------|--------------------------------------------------|
| GRMZM2G064023 | 4  | 239429877 | 239437026 '8.1.2' | 'TCA / org.<br>transformation.TCA.CS'            |
| GRMZM2G009808 | 9  | 147424502 | 147432777 '8.1.3' | 'TCA / org.<br>transformation.TCA.aconit<br>ase' |
| GRMZM2G010044 | 4  | 244491906 | 244495878 '8.1.3' | 'TCA / org.<br>transformation.TCA.aconit<br>ase' |
| GRMZM2G020801 | 4  | 27965455  | 27972006 '8.1.3'  | 'TCA / org.<br>transformation.TCA.aconit<br>ase' |
| GRMZM2G176397 | 1  | 8098618   | 8110507 '8.1.3'   | 'TCA / org.<br>transformation.TCA.aconit<br>ase' |
| GRMZM2G364988 | 5  | 90717637  | 90722216 '8.1.3'  | 'TCA / org.<br>transformation.TCA.aconit<br>ase' |
| GRMZM2G467338 | 2  | 111210985 | 111218286 '8.1.3' | 'TCA / org.<br>transformation.TCA.aconit<br>ase' |
| GRMZM2G025366 | 10 | 124999525 | 125003414 '8.1.4' | 'TCA / org.<br>transformation.TCA.IDH'           |
| GRMZM2G116872 | 5  | 179738721 | 179739482 '8.1.4' | 'TCA / org.<br>transformation.TCA.IDH'           |

|                  |    |           |                   |                                                                 |
|------------------|----|-----------|-------------------|-----------------------------------------------------------------|
| GRMZM2G142863    | 2  | 69207580  | 69214144 '8.1.5'  | 'TCA / org.<br>transformation.TCA.2-oxoglutarate dehydrogenase' |
| GRMZM2G151041    | 10 | 109627692 | 109634086 '8.1.5' | 'TCA / org.<br>transformation.TCA.2-oxoglutarate dehydrogenase' |
| AC194977.2_FG004 | 7  | 154331843 | 154338113 '8.1.5' | 'TCA / org.<br>transformation.TCA.2-oxoglutarate dehydrogenase' |
| GRMZM2G039251    | 2  | 204104585 | 204110782 '8.1.6' | 'TCA / org.<br>transformation.TCA.succinyl-CoA ligase'          |
| GRMZM2G064695    | 5  | 185263651 | 185276024 '8.1.6' | 'TCA / org.<br>transformation.TCA.succinyl-CoA ligase'          |
| GRMZM2G072054    | 7  | 154540091 | 154546033 '8.1.6' | 'TCA / org.<br>transformation.TCA.succinyl-CoA ligase'          |
| GRMZM2G064799    | 7  | 4240127   | 4244957 '8.1.7'   | 'TCA / org.<br>transformation.TCA.succinate dehydrogenase'      |
| GRMZM2G079888    | 2  | 233616254 | 233621560 '8.1.7' | 'TCA / org.<br>transformation.TCA.succinate dehydrogenase'      |
| GRMZM2G010823    | 1  | 56845959  | 56852028 '8.1.8'  | 'TCA / org.<br>transformation.TCA.fumarase'                     |
| GRMZM2G348729    | 4  | 3757415   | 3761592 '8.1.8'   | 'TCA / org.<br>transformation.TCA.fumarase'                     |

|               |   |           |                   |                                                                                              |
|---------------|---|-----------|-------------------|----------------------------------------------------------------------------------------------|
| GRMZM2G002416 | 8 | 37410801  | 37414982 '8.2.11' | 'TCA / org.<br>transformation.other<br>organic acid<br>transformaitons.atp-citrate<br>lyase' |
| GRMZM2G018566 | 3 | 43636005  | 43641308 '8.2.4'  | 'TCA / org.<br>transformation.other<br>organic acid<br>transformaitons.IDH'                  |
| GRMZM2G120857 | 8 | 2302889   | 2310491 '8.2.4'   | 'TCA / org.<br>transformation.other<br>organic acid<br>transformaitons.IDH'                  |
| GRMZM2G173251 | 1 | 44690227  | 44691933 '8.2.4'  | 'TCA / org.<br>transformation.other<br>organic acid<br>transformaitons.IDH'                  |
| GRMZM2G404855 | 9 | 11196570  | 11198734 '8.2.4'  | 'TCA / org.<br>transformation.other<br>organic acid<br>transformaitons.IDH'                  |
| GRMZM2G101290 | 2 | 19834359  | 19836146 '8.2.9'  | 'TCA / org.<br>transformation.other<br>organic acid<br>transformaitons.cyt MDH'              |
| GRMZM2G129513 | 1 | 202617705 | 202621864 '8.2.9' | 'TCA / org.<br>transformation.other<br>organic acid<br>transformaitons.cyt MDH'              |
| GRMZM2G415359 | 1 | 230672384 | 230678149 '8.2.9' | 'TCA / org.<br>transformation.other<br>organic acid<br>transformaitons.cyt MDH'              |
| GRMZM2G080044 | 9 | 7545549   | 7556197 '9.2.3'   | 'mitochondrial electron<br>transport / ATP<br>synthesis.NADH-DH.type<br>II.mitochondrial'    |



|                  |    |           |                      |                                                                                          |
|------------------|----|-----------|----------------------|------------------------------------------------------------------------------------------|
| GRMZM2G178254    | 9  | 143057589 | 143062772 '10.1'     | 'cell wall.precursor<br>synthesis'                                                       |
| GRMZM2G116586    | 5  | 56087766  | 56099160 '10.1.1.20' | 'cell wall.precursor<br>synthesis.NDP sugar<br>pyrophosphorylase.multiple<br>NDP-Sugars' |
| GRMZM2G161493    | 6  | 85653771  | 85664177 '10.1.1.20' | 'cell wall.precursor<br>synthesis.NDP sugar<br>pyrophosphorylase.multiple<br>NDP-Sugars' |
| GRMZM2G396565    | 5  | 9701265   | 9705076 '10.1.1.20'  | 'cell wall.precursor<br>synthesis.NDP sugar<br>pyrophosphorylase.multiple<br>NDP-Sugars' |
| GRMZM2G481027    | 5  | 213333375 | 213338806 '10.5.5'   | 'cell wall.cell wall<br>proteins.RGP'                                                    |
| AC197578.4_FG001 | 3  | 191000002 | 191005208 '10.6.1'   | 'cell<br>wall.degradation.cellulases<br>and beta -1,4-glucanases'                        |
| GRMZM2G052844    | 8  | 143141758 | 143145571 '10.6.3'   | 'cell<br>wall.degradation.pectate<br>lyases and<br>polygalacturonases'                   |
| GRMZM2G012328    | 2  | 42828109  | 42830223 '10.8.1'    | 'cell<br>wall.pectin*esterases.PME'                                                      |
| GRMZM2G017555    | 8  | 5283282   | 5285722 '10.8.1'     | 'cell<br>wall.pectin*esterases.PME'                                                      |
| GRMZM2G125356    | 10 | 121933301 | 121935490 '10.8.1'   | 'cell<br>wall.pectin*esterases.PME'                                                      |

|               |    |           |                     |                                                                            |
|---------------|----|-----------|---------------------|----------------------------------------------------------------------------|
| GRMZM2G085547 | 4  | 169312670 | 169319688 '11.1.13' | 'lipid metabolism.FA synthesis and FA elongation.acyl-CoA binding protein' |
| GRMZM2G043602 | 5  | 162570326 | 162575805 '11.1.4'  | 'lipid metabolism.FA synthesis and FA elongation.ACP oxoacyl reductase'    |
| GRMZM2G099696 | 10 | 107949730 | 107957536 '11.1.4'  | 'lipid metabolism.FA synthesis and FA elongation.ACP oxoacyl reductase'    |
| GRMZM2G141256 | 9  | 93250026  | 93253044 '11.1.4'   | 'lipid metabolism.FA synthesis and FA elongation.ACP oxoacyl reductase'    |
| GRMZM2G351023 | 2  | 76461448  | 76483084 '11.1.4'   | 'lipid metabolism.FA synthesis and FA elongation.ACP oxoacyl reductase'    |
| GRMZM2G013783 | 1  | 48808709  | 48813764 '11.1.8'   | 'lipid metabolism.FA synthesis and FA elongation.acyl coa ligase'          |
| GRMZM2G076723 | 1  | 198591257 | 198596276 '12.1.1'  | 'N-metabolism.nitrate metabolism.NR'                                       |
| GRMZM2G428027 | 4  | 176742163 | 176746013 '12.1.1'  | 'N-metabolism.nitrate metabolism.NR'                                       |
| GRMZM2G079381 | 4  | 177668483 | 177672038 '12.1.2'  | 'N-metabolism.nitrate metabolism.nitrite reductase'                        |
| GRMZM2G102959 | 5  | 209105303 | 209108217 '12.1.2'  | 'N-metabolism.nitrate metabolism.nitrite reductase'                        |

|               |    |           |                    |                                                            |
|---------------|----|-----------|--------------------|------------------------------------------------------------|
| GRMZM2G036609 | 7  | 165246599 | 165265413 '12.2.1' | 'N-metabolism.ammonia<br>metabolism.glutamate<br>synthase' |
| GRMZM2G077054 | 8  | 149895033 | 149906176 '12.2.1' | 'N-metabolism.ammonia<br>metabolism.glutamate<br>synthase' |
| GRMZM2G085078 | 3  | 206749335 | 206761045 '12.2.1' | 'N-metabolism.ammonia<br>metabolism.glutamate<br>synthase' |
| GRMZM2G375064 | 6  | 163302506 | 163314279 '12.2.1' | 'N-metabolism.ammonia<br>metabolism.glutamate<br>synthase' |
| GRMZM2G024104 | 1  | 266960337 | 266963719 '12.2.2' | 'N-metabolism.ammonia<br>metabolism.glutamine<br>synthase' |
| GRMZM2G036464 | 4  | 166172187 | 166175518 '12.2.2' | 'N-metabolism.ammonia<br>metabolism.glutamine<br>synthase' |
| GRMZM2G046601 | 9  | 141641504 | 141649813 '12.2.2' | 'N-metabolism.ammonia<br>metabolism.glutamine<br>synthase' |
| GRMZM2G050514 | 1  | 28082680  | 28086336 '12.2.2'  | 'N-metabolism.ammonia<br>metabolism.glutamine<br>synthase' |
| GRMZM2G098290 | 10 | 146022264 | 146030957 '12.2.2' | 'N-metabolism.ammonia<br>metabolism.glutamine<br>synthase' |
| GRMZM2G115646 | 1  | 234991282 | 235014998 '12.2.2' | 'N-metabolism.ammonia<br>metabolism.glutamine<br>synthase' |

|               |    |           |           |              |                                                                                              |
|---------------|----|-----------|-----------|--------------|----------------------------------------------------------------------------------------------|
| GRMZM2G178415 | 1  | 286266329 | 286273468 | '12.3.1'     | 'N-metabolism.N-degradation.glutamate dehydrogenase'                                         |
| GRMZM2G427097 | 10 | 133674688 | 133679141 | '12.3.1'     | 'N-metabolism.N-degradation.glutamate dehydrogenase'                                         |
| GRMZM2G017110 | 1  | 198083275 | 198087087 | '13.1.1.1.1' | 'amino acid metabolism.synthesis.central amino acid metabolism.GABA.Glutamate decarboxylase' |
| GRMZM2G098875 | 9  | 139876568 | 139879623 | '13.1.1.1.1' | 'amino acid metabolism.synthesis.central amino acid metabolism.GABA.Glutamate decarboxylase' |
| GRMZM2G101069 | 2  | 45433750  | 45436676  | '13.1.1.1.1' | 'amino acid metabolism.synthesis.central amino acid metabolism.GABA.Glutamate decarboxylase' |
| GRMZM2G355906 | 2  | 45162982  | 45165149  | '13.1.1.1.1' | 'amino acid metabolism.synthesis.central amino acid metabolism.GABA.Glutamate decarboxylase' |
| GRMZM2G143357 | 4  | 104159711 | 104161990 | '13.1.4.1'   | 'amino acid metabolism.synthesis.branched chain group.common'                                |
| GRMZM2G175171 | 8  | 18702662  | 18706896  | '13.1.4.1'   | 'amino acid metabolism.synthesis.branched chain group.common'                                |
| GRMZM2G331723 | 3  | 202075944 | 202078089 | '13.1.4.1'   | 'amino acid metabolism.synthesis.branched chain group.common'                                |

|               |    |           |                         |                                                                                                         |
|---------------|----|-----------|-------------------------|---------------------------------------------------------------------------------------------------------|
| GRMZM2G104613 | 10 | 148484783 | 148488498 '13.1.4.4'    | 'amino acid<br>metabolism.synthesis.branched chain group.leucine specific'                              |
| GRMZM2G011743 | 10 | 148060726 | 148064779 '13.2.3.1.1'  | 'amino acid<br>metabolism.degradation.aspartate family.asparagine.L-asparaginase'                       |
| GRMZM2G105644 | 5  | 205809564 | 205812104 '16.1.1'      | 'secondary<br>metabolism.isoprenoids.non-mevalonate pathway'                                            |
| GRMZM2G419111 | 3  | 39732168  | 39734430 '16.1.1'       | 'secondary<br>metabolism.isoprenoids.non-mevalonate pathway'                                            |
| GRMZM2G137151 | 6  | 146544132 | 146548400 '16.1.1.1'    | 'secondary<br>metabolism.isoprenoids.non-mevalonate pathway.DXS'                                        |
| GRMZM2G118345 | 2  | 27970073  | 27973176 '16.2.1.1'     | 'secondary<br>metabolism.phenylpropanoids.lignin biosynthesis.PAL'                                      |
| GRMZM2G407181 | 1  | 174393878 | 174396786 '17.1.1.1.10' | 'hormone<br>metabolism.abscisic acid.synthesis-degradation.synthesis.9-cis-epoxycarotenoid dioxygenase' |
| GRMZM2G054361 | 1  | 270810521 | 270813011 '17.5.1.1'    | 'hormone<br>metabolism.ethylene.synthesis-degradation.1-aminocyclopropane-1-carboxylate synthase'       |
| GRMZM2G043453 | 5  | 3115494   | 3123220 '19.10'         | 'tetrapyrrole<br>synthesis.magnesium chelatase'                                                         |

|               |    |           |                   |                                                                                           |
|---------------|----|-----------|-------------------|-------------------------------------------------------------------------------------------|
| GRMZM2G323024 | 10 | 147484237 | 147490411 '19.10' | 'tetrapyrrole synthesis.magnesium chelatase'                                              |
| GRMZM2G419806 | 10 | 8770449   | 8774928 '19.10'   | 'tetrapyrrole synthesis.magnesium chelatase'                                              |
| GRMZM2G161673 | 6  | 64366398  | 64368037 '19.11'  | 'tetrapyrrole synthesis.magnesium protoporphyrin IX methyltransferase'                    |
| GRMZM2G043109 | 3  | 44799542  | 44801097 '19.12'  | 'tetrapyrrole synthesis.magnesium-protoporphyrin IX monomethyl ester (oxidative) cyclase' |
| GRMZM2G063048 | 1  | 59928668  | 59930266 '19.13'  | 'tetrapyrrole synthesis.divinyl chlorophyllide-a 8-vinyl-reductase'                       |
| GRMZM2G036455 | 1  | 226851885 | 226854973 '19.14' | 'tetrapyrrole synthesis.protochlorophyllide reductase'                                    |
| GRMZM2G073351 | 5  | 24724429  | 24727749 '19.14'  | 'tetrapyrrole synthesis.protochlorophyllide reductase'                                    |
| GRMZM2G084958 | 2  | 1448799   | 1450386 '19.14'   | 'tetrapyrrole synthesis.protochlorophyllide reductase'                                    |
| GRMZM2G162672 | 6  | 140474382 | 140479585 '19.15' | 'tetrapyrrole synthesis.chlorophyll synthase'                                             |
| GRMZM2G004222 | 9  | 117272696 | 117279058 '19.21' | 'tetrapyrrole synthesis.heme oxygenase'                                                   |

|               |    |           |                  |                                                                |
|---------------|----|-----------|------------------|----------------------------------------------------------------|
| GRMZM2G093900 | 4  | 26739699  | 26747729 '19.3'  | 'tetrapyrrole synthesis.GSA'                                   |
| GRMZM2G108125 | 10 | 141877963 | 141889878 '19.3' | 'tetrapyrrole synthesis.GSA'                                   |
| GRMZM2G116258 | 6  | 155741745 | 155746073 '19.3' | 'tetrapyrrole synthesis.GSA'                                   |
| GRMZM2G024738 | 8  | 143565684 | 143569182 '19.7' | 'tetrapyrrole<br>synthesis.uroporphyrinogen<br>decarboxylase'  |
| GRMZM2G025031 | 8  | 143570080 | 143573296 '19.7' | 'tetrapyrrole<br>synthesis.uroporphyrinogen<br>decarboxylase'  |
| GRMZM2G044074 | 1  | 56657696  | 56662275 '19.7'  | 'tetrapyrrole<br>synthesis.uroporphyrinogen<br>decarboxylase'  |
| GRMZM2G046468 | 2  | 201408364 | 201415873 '19.7' | 'tetrapyrrole<br>synthesis.uroporphyrinogen<br>decarboxylase'  |
| GRMZM2G377609 | 3  | 216229977 | 216239524 '19.7' | 'tetrapyrrole<br>synthesis.uroporphyrinogen<br>decarboxylase'  |
| GRMZM2G032282 | 10 | 141554119 | 141563642 '19.8' | 'tetrapyrrole<br>synthesis.coproporphyrinog<br>en III oxidase' |
| GRMZM2G105436 | 1  | 4695505   | 4698085 '19.8'   | 'tetrapyrrole<br>synthesis.coproporphyrinog<br>en III oxidase' |

|               |   |           |                    |                                                          |
|---------------|---|-----------|--------------------|----------------------------------------------------------|
| GRMZM2G039396 | 8 | 861425    | 867691 '19.9'      | 'tetrapyrrole<br>synthesis.protoporphyrin<br>IX oxidase' |
| GRMZM2G364901 | 2 | 35143649  | 35152206 '19.9'    | 'tetrapyrrole<br>synthesis.protoporphyrin<br>IX oxidase' |
| GRMZM2G103197 | 1 | 203879703 | 203880944 '19.99'  | 'tetrapyrrole<br>synthesis.unspecified'                  |
| GRMZM2G127421 | 1 | 239119056 | 239120717 '19.99'  | 'tetrapyrrole<br>synthesis.unspecified'                  |
| GRMZM2G170734 | 4 | 57460774  | 57462104 '19.99'   | 'tetrapyrrole<br>synthesis.unspecified'                  |
| GRMZM2G077068 | 1 | 220631422 | 220636996 '20.1'   | 'stress.biotic'                                          |
| GRMZM2G433184 | 1 | 123330659 | 123331725 '20.1'   | 'stress.biotic'                                          |
| GRMZM2G458824 | 1 | 139905315 | 139907664 '20.1'   | 'stress.biotic'                                          |
| GRMZM2G079668 | 1 | 262282335 | 262288193 '20.2.1' | 'stress.abiotic.heat'                                    |
| GRMZM2G158093 | 4 | 160462329 | 160467875 '20.2.1' | 'stress.abiotic.heat'                                    |



|               |    |           |                      |                                                                     |
|---------------|----|-----------|----------------------|---------------------------------------------------------------------|
| GRMZM2G310431 | 8  | 167668008 | 167671371 '20.2.1'   | 'stress.abiotic.heat'                                               |
| GRMZM2G136522 | 7  | 165140669 | 165145636 '21.1'     | 'redox.thioredoxin'                                                 |
| GRMZM2G084881 | 2  | 162770371 | 162775456 '21.2'     | 'redox.ascorbate and glutathione'                                   |
| GRMZM2G134708 | 4  | 60429214  | 60433877 '21.2'      | 'redox.ascorbate and glutathione'                                   |
| GRMZM2G020429 | 1  | 193471647 | 193475242 '23.3.1.3' | 'nucleotide metabolism.salvage.phosphoribosyltransferases.upp'      |
| GRMZM2G034143 | 5  | 65331499  | 65341592 '23.3.1.3'  | 'nucleotide metabolism.salvage.phosphoribosyltransferases.upp'      |
| GRMZM2G169462 | 4  | 246689335 | 246695416 '23.3.1.3' | 'nucleotide metabolism.salvage.phosphoribosyltransferases.upp'      |
| GRMZM2G089767 | 2  | 28059009  | 28062983 '23.3.2.1'  | 'nucleotide metabolism.salvage.nucleoside kinases.adenosine kinase' |
| GRMZM2G135132 | 4  | 142189739 | 142194687 '23.3.2.1' | 'nucleotide metabolism.salvage.nucleoside kinases.adenosine kinase' |
| GRMZM2G003648 | 10 | 104676885 | 104678043 '23.3.2.2' | 'nucleotide metabolism.salvage.nucleoside kinases.uridine kinase'   |

|               |    |           |           |            |                                                                          |
|---------------|----|-----------|-----------|------------|--------------------------------------------------------------------------|
| GRMZM2G147430 | 5  | 200604317 | 200610357 | '23.3.2.2' | 'nucleotide<br>metabolism.salvage.nucleo<br>side kinases.uridine kinase' |
| GRMZM2G473385 | 10 | 104680615 | 104716008 | '23.3.2.2' | 'nucleotide<br>metabolism.salvage.nucleo<br>side kinases.uridine kinase' |
| GRMZM2G179981 | 5  | 129940462 | 129948912 | '26.11.1'  | 'misc.alcohol<br>dehydrogenases'                                         |
| GRMZM2G129155 | 3  | 159135120 | 159146145 | '26.17'    | 'misc.dynamin'                                                           |
| GRMZM2G180335 | 8  | 160441022 | 160450478 | '26.17'    | 'misc.dynamin'                                                           |
| GRMZM2G005107 | 2  | 10282188  | 10285900  | '26.22'    | 'misc.short chain<br>dehydrogenase/reductase<br>(SDR)'                   |
| GRMZM2G006119 | 7  | 163518840 | 163521166 | '26.22'    | 'misc.short chain<br>dehydrogenase/reductase<br>(SDR)'                   |
| GRMZM2G025243 | 10 | 141814622 | 141825756 | '26.22'    | 'misc.short chain<br>dehydrogenase/reductase<br>(SDR)'                   |
| GRMZM2G025885 | 7  | 166020180 | 166021426 | '26.22'    | 'misc.short chain<br>dehydrogenase/reductase<br>(SDR)'                   |
| GRMZM2G041694 | 6  | 162588738 | 162594260 | '26.22'    | 'misc.short chain<br>dehydrogenase/reductase<br>(SDR)'                   |
| GRMZM2G047800 | 4  | 22649232  | 22655449  | '26.22'    | 'misc.short chain<br>dehydrogenase/reductase<br>(SDR)'                   |

|               |    |           |           |         |                                                        |
|---------------|----|-----------|-----------|---------|--------------------------------------------------------|
| GRMZM2G050915 | 3  | 4081527   | 4084178   | '26.22' | 'misc.short chain<br>dehydrogenase/reductase<br>(SDR)' |
| GRMZM2G053958 | 7  | 83579815  | 83584363  | '26.22' | 'misc.short chain<br>dehydrogenase/reductase<br>(SDR)' |
| GRMZM2G059361 | 9  | 25811715  | 25812405  | '26.22' | 'misc.short chain<br>dehydrogenase/reductase<br>(SDR)' |
| GRMZM2G065171 | 2  | 43265679  | 43266780  | '26.22' | 'misc.short chain<br>dehydrogenase/reductase<br>(SDR)' |
| GRMZM2G065194 | 5  | 15537955  | 15543482  | '26.22' | 'misc.short chain<br>dehydrogenase/reductase<br>(SDR)' |
| GRMZM2G069523 | 2  | 76900319  | 76901709  | '26.22' | 'misc.short chain<br>dehydrogenase/reductase<br>(SDR)' |
| GRMZM2G070279 | 10 | 127263881 | 127267465 | '26.22' | 'misc.short chain<br>dehydrogenase/reductase<br>(SDR)' |
| GRMZM2G076981 | 7  | 156739143 | 156740465 | '26.22' | 'misc.short chain<br>dehydrogenase/reductase<br>(SDR)' |
| GRMZM2G087323 | 4  | 131586967 | 131590428 | '26.22' | 'misc.short chain<br>dehydrogenase/reductase<br>(SDR)' |
| GRMZM2G108338 | 2  | 68514771  | 68516412  | '26.22' | 'misc.short chain<br>dehydrogenase/reductase<br>(SDR)' |
| GRMZM2G109743 | 7  | 34831938  | 34840416  | '26.22' | 'misc.short chain<br>dehydrogenase/reductase<br>(SDR)' |
| GRMZM2G115442 | 1  | 188223477 | 188234787 | '26.22' | 'misc.short chain<br>dehydrogenase/reductase<br>(SDR)' |

|               |   |           |           |         |                                                  |
|---------------|---|-----------|-----------|---------|--------------------------------------------------|
| GRMZM2G128146 | 5 | 172979201 | 172981795 | '26.22' | 'misc.short chain dehydrogenase/reductase (SDR)' |
| GRMZM2G128577 | 9 | 114489103 | 114492669 | '26.22' | 'misc.short chain dehydrogenase/reductase (SDR)' |
| GRMZM2G135277 | 2 | 33443786  | 33447532  | '26.22' | 'misc.short chain dehydrogenase/reductase (SDR)' |
| GRMZM2G156739 | 1 | 294320452 | 294321554 | '26.22' | 'misc.short chain dehydrogenase/reductase (SDR)' |
| GRMZM2G162527 | 3 | 16934820  | 16938395  | '26.22' | 'misc.short chain dehydrogenase/reductase (SDR)' |
| GRMZM2G332976 | 5 | 3141403   | 3143154   | '26.22' | 'misc.short chain dehydrogenase/reductase (SDR)' |
| GRMZM2G374313 | 4 | 134129563 | 134132816 | '26.22' | 'misc.short chain dehydrogenase/reductase (SDR)' |
| GRMZM2G403313 | 3 | 102469345 | 102470428 | '26.22' | 'misc.short chain dehydrogenase/reductase (SDR)' |
| GRMZM2G455809 | 1 | 46809894  | 46811315  | '26.22' | 'misc.short chain dehydrogenase/reductase (SDR)' |
| GRMZM2G464885 | 1 | 86363554  | 86366081  | '26.22' | 'misc.short chain dehydrogenase/reductase (SDR)' |
| GRMZM2G049730 | 6 | 95876557  | 95878287  | '26.24' | 'misc.GCN5-related N-acetyltransferase'          |
| GRMZM2G169326 | 5 | 198125731 | 198126989 | '26.24' | 'misc.GCN5-related N-acetyltransferase'          |
| GRMZM2G126468 | 3 | 158812058 | 158825112 | '26.3'  | 'misc.gluco-, galacto- and mannosidases'         |

|               |    |           |                   |                                                                                                         |
|---------------|----|-----------|-------------------|---------------------------------------------------------------------------------------------------------|
| GRMZM2G428518 | 6  | 90528036  | 90532012 '26.3.1' | 'misc.gluco-, galacto- and mannosidases.alpha-galactosidase'                                            |
| GRMZM2G000052 | 2  | 8944359   | 8949614 '26.7'    | 'misc.oxidases - copper, flavone etc.'                                                                  |
| GRMZM2G030529 | 1  | 80794090  | 80803612 '26.7'   | 'misc.oxidases - copper, flavone etc.'                                                                  |
| GRMZM2G035994 | 3  | 202104286 | 202106004 '26.7'  | 'misc.oxidases - copper, flavone etc.'                                                                  |
| GRMZM2G106588 | 7  | 1791536   | 1792869 '26.7'    | 'misc.oxidases - copper, flavone etc.'                                                                  |
| GRMZM2G108637 | 7  | 1561015   | 1562929 '26.7'    | 'misc.oxidases - copper, flavone etc.'                                                                  |
| GRMZM2G148605 | 7  | 1631013   | 1632729 '26.7'    | 'misc.oxidases - copper, flavone etc.'                                                                  |
| GRMZM2G162222 | 7  | 1571640   | 1573598 '26.7'    | 'misc.oxidases - copper, flavone etc.'                                                                  |
| GRMZM2G396856 | 10 | 142513450 | 142518700 '26.7'  | 'misc.oxidases - copper, flavone etc.'                                                                  |
| GRMZM2G479068 | 7  | 120716731 | 120722461 '26.7'  | 'misc.oxidases - copper, flavone etc.'                                                                  |
| GRMZM2G000586 | 4  | 140232    | 141202 '26.8'     | 'misc.nitrilases, *nitrile lyases, berberine bridge enzymes, reticuline oxidases, troponine reductases' |

|                  |    |           |                     |                                                                                                         |
|------------------|----|-----------|---------------------|---------------------------------------------------------------------------------------------------------|
| GRMZM2G002304    | 8  | 158608078 | 158610066 '26.8'    | 'misc.nitrilases, *nitrile lyases, berberine bridge enzymes, reticuline oxidases, troponine reductases' |
| GRMZM2G097981    | 4  | 3246182   | 3249022 '26.8'      | 'misc.nitrilases, *nitrile lyases, berberine bridge enzymes, reticuline oxidases, troponine reductases' |
| GRMZM2G141799    | 1  | 39282381  | 39283480 '26.8'     | 'misc.nitrilases, *nitrile lyases, berberine bridge enzymes, reticuline oxidases, troponine reductases' |
| GRMZM2G152258    | 2  | 227406058 | 227407744 '26.8'    | 'misc.nitrilases, *nitrile lyases, berberine bridge enzymes, reticuline oxidases, troponine reductases' |
| GRMZM2G370988    | 4  | 3171258   | 3172772 '26.8'      | 'misc.nitrilases, *nitrile lyases, berberine bridge enzymes, reticuline oxidases, troponine reductases' |
| GRMZM2G008356    | 7  | 152003328 | 152004614 '27.3.1'  | 'RNA.regulation of transcription.ABI3/VP1-related B3-domain-containing transcription factor family'     |
| GRMZM2G050939    | 6  | 18733868  | 18737683 '27.3.11'  | 'RNA.regulation of transcription.C2H2 zinc finger family'                                               |
| AC235534.1_FG007 | 10 | 136522908 | 136529482 '27.3.22' | 'RNA.regulation of transcription.HB,Homeobox transcription factor family'                               |

|               |    |           |           |           |                                                                                      |
|---------------|----|-----------|-----------|-----------|--------------------------------------------------------------------------------------|
| GRMZM2G088114 | 5  | 68612020  | 68622493  | '27.3.23' | 'RNA.regulation of transcription.HSF,Heat-shock transcription factor family'         |
| GRMZM2G097636 | 10 | 139828920 | 139830373 | '27.3.25' | 'RNA.regulation of transcription.MYB domain transcription factor family'             |
| GRMZM2G097638 | 10 | 139831962 | 139833454 | '27.3.25' | 'RNA.regulation of transcription.MYB domain transcription factor family'             |
| GRMZM2G091490 | 6  | 64902485  | 64904929  | '27.3.27' | 'RNA.regulation of transcription.NAC domain transcription factor family'             |
| GRMZM2G160990 | 8  | 148619605 | 148622182 | '27.3.30' | 'RNA.regulation of transcription.Trihelix, Triple-Helix transcription factor family' |
| GRMZM2G024898 | 2  | 12699966  | 12704308  | '27.3.32' | 'RNA.regulation of transcription.WRKY domain transcription factor family'            |
| GRMZM2G150327 | 1  | 111239368 | 111241402 | '27.3.6'  | 'RNA.regulation of transcription.bHLH,Basic Helix-Loop-Helix family'                 |
| GRMZM2G164835 | 6  | 91501036  | 91507779  | '27.3.67' | 'RNA.regulation of transcription.putative transcription regulator'                   |
| GRMZM2G128992 | 5  | 202842308 | 202844301 | '27.3.99' | 'RNA.regulation of transcription.unclassified'                                       |
| GRMZM2G141036 | 4  | 163053052 | 163054833 | '27.3.99' | 'RNA.regulation of transcription.unclassified'                                       |
| GRMZM2G071589 | 5  | 31972843  | 31982874  | '27.4'    | 'RNA.RNA binding'                                                                    |
| GRMZM2G076597 | 1  | 237084901 | 237093023 | '27.4'    | 'RNA.RNA binding'                                                                    |

|                  |   |           |                          |                                                                  |
|------------------|---|-----------|--------------------------|------------------------------------------------------------------|
| GRMZM2G163658    | 8 | 116210469 | 116228488 '28.1'         | 'DNA.synthesis/chromatin structure'                              |
| GRMZM2G534116    | 6 | 108099461 | 108114688 '28.1'         | 'DNA.synthesis/chromatin structure'                              |
| AC213050.3_FG001 | 6 | 95029863  | 95032085 '28.1'          | 'DNA.synthesis/chromatin structure'                              |
| GRMZM2G353125    | 6 | 94447091  | 94452045 '28.2'          | 'DNA.repair'                                                     |
| AC197555.3_FG008 | 3 | 225920322 | 225921245 '28.2'         | 'DNA.repair'                                                     |
| GRMZM2G337905    | 6 | 3439887   | 3462130 '28.99'          | 'DNA.unspecified'                                                |
| GRMZM2G459828    | 4 | 39828519  | 39834124 '29.2.1.2.1.10' | 'protein.synthesis.ribosomal protein.eukaryotic.40S subunit.S10' |
| GRMZM2G018484    | 5 | 212480742 | 212482922 '29.3.3'       | 'protein.targeting.chloroplast'                                  |
| GRMZM2G038487    | 8 | 155903623 | 155907742 '29.3.3'       | 'protein.targeting.chloroplast'                                  |



|               |   |           |                        |                                           |
|---------------|---|-----------|------------------------|-------------------------------------------|
| GRMZM2G171390 | 3 | 142782835 | 142785709 '29.3.3'     | 'protein.targeting.chloroplast'           |
| GRMZM2G054634 | 9 | 109909155 | 109913885 '29.4'       | 'protein.postranslational modification'   |
| GRMZM2G169080 | 1 | 96685018  | 96690137 '29.4'        | 'protein.postranslational modification'   |
| GRMZM2G086132 | 6 | 163919419 | 163927005 '29.5.11.20' | 'protein.degradation.ubiquitin.proteasom' |
| GRMZM2G361100 | 2 | 49121099  | 49123057 '29.5.11.4.2' | 'protein.degradation.ubiquitin.E3.RING'   |
| GRMZM2G171713 | 1 | 150964241 | 150966527 '29.5.3'     | 'protein.degradation.cysteine protease'   |
| GRMZM2G384762 | 4 | 35092723  | 35097996 '29.5.3'      | 'protein.degradation.cysteine protease'   |
| GRMZM2G100889 | 3 | 17661589  | 17667021 '29.5.5'      | 'protein.degradation.serine protease'     |
| GRMZM2G368388 | 3 | 38105805  | 38107975 '30.2.99'     | 'signalling.receptor kinases.misc'        |
| GRMZM2G048205 | 5 | 39108198  | 39112618 '30.3'        | 'signalling.calcium'                      |
| GRMZM2G082836 | 1 | 66315589  | 66318972 '30.5'        | 'signalling.G-proteins'                   |
| GRMZM2G305211 | 7 | 154236259 | 154245505 '30.7'       | 'signalling.14-3-3 proteins'              |

|               |    |           |                   |                                                               |
|---------------|----|-----------|-------------------|---------------------------------------------------------------|
| GRMZM2G017257 | 9  | 7118375   | 7142045 '31.1'    | 'cell.organisation'                                           |
| GRMZM2G026800 | 5  | 23129120  | 23129834 '31.1'   | 'cell.organisation'                                           |
| GRMZM2G177224 | 10 | 148434353 | 148438309 '31.2'  | 'cell.division'                                               |
| GRMZM2G050933 | 7  | 150979155 | 150981604 '31.3'  | 'cell.cycle'                                                  |
| GRMZM2G339563 | 1  | 10065048  | 10069386 '31.5.1' | 'cell.cell death.plants'                                      |
| GRMZM2G018251 | 4  | 245659689 | 245663836 '33.99' | 'development.unspecified'                                     |
| GRMZM2G037229 | 3  | 172143899 | 172146939 '34.10' | 'transport.nucleotides'                                       |
| GRMZM2G097421 | 8  | 100463752 | 100467370 '34.10' | 'transport.nucleotides'                                       |
| GRMZM2G366919 | 2  | 167975302 | 167981054 '34.12' | 'transport.metal'                                             |
| GRMZM2G099382 | 3  | 214325917 | 214328710 '34.14' | 'transport.unspecified cations'                               |
| GRMZM2G333183 | 10 | 80347453  | 80353583 '34.16'  | 'transport.ABC transporters and multidrug resistance systems' |
| GRMZM2G432480 | 5  | 52926316  | 52928552 '34.16'  | 'transport.ABC transporters and multidrug resistance systems' |

|               |   |           |                  |                                                                    |
|---------------|---|-----------|------------------|--------------------------------------------------------------------|
| GRMZM2G062156 | 2 | 204707235 | 204709413 '34.2' | 'transport.sugars'                                                 |
|               |   |           |                  | 'transport.metabolite<br>transporters at the envelope<br>membrane' |
| GRMZM2G127591 | 2 | 26208479  | 26211066 '34.8'  |                                                                    |
| GRMZM2G014934 | 1 | 259776005 | 259778713 '35.2' | 'not assigned.unknown'                                             |
| GRMZM2G016586 | 3 | 123151371 | 123152804 '35.2' | 'not assigned.unknown'                                             |
| GRMZM2G019050 | 1 | 196548636 | 196556019 '35.2' | 'not assigned.unknown'                                             |
| GRMZM2G023528 | 4 | 244760047 | 244763636 '35.2' | 'not assigned.unknown'                                             |
| GRMZM2G026922 | 4 | 151524358 | 151533923 '35.2' | 'not assigned.unknown'                                             |
| GRMZM2G043336 | 3 | 128451762 | 128453285 '35.2' | 'not assigned.unknown'                                             |
| GRMZM2G046911 | 3 | 186560535 | 186562222 '35.2' | 'not assigned.unknown'                                             |
| GRMZM2G140101 | 3 | 127976340 | 127977840 '35.2' | 'not assigned.unknown'                                             |
| GRMZM2G149383 | 1 | 70171404  | 70176057 '35.2'  | 'not assigned.unknown'                                             |
| GRMZM2G166145 | 4 | 243106156 | 243109791 '35.2' | 'not assigned.unknown'                                             |
| GRMZM2G324705 | 3 | 194296064 | 194297742 '35.2' | 'not assigned.unknown'                                             |
| GRMZM2G375015 | 6 | 28576111  | 28582357 '35.2'  | 'not assigned.unknown'                                             |
| GRMZM2G377168 | 5 | 177312298 | 177313349 '35.2' | 'not assigned.unknown'                                             |

|                  |    |           |                  |                        |
|------------------|----|-----------|------------------|------------------------|
| GRMZM2G380414    | 8  | 16486555  | 16487318 '35.2'  | 'not assigned.unknown' |
| GRMZM2G426688    | 9  | 27629256  | 27631752 '35.2'  | 'not assigned.unknown' |
| GRMZM2G427503    | 6  | 108743849 | 108744462 '35.2' | 'not assigned.unknown' |
| GRMZM2G431708    | 6  | 117957036 | 117976912 '35.2' | 'not assigned.unknown' |
| GRMZM2G438299    | 8  | 170335491 | 170336771 '35.2' | 'not assigned.unknown' |
| GRMZM2G472852    | 7  | 166966590 | 166967300 '35.2' | 'not assigned.unknown' |
| GRMZM2G487136    | 8  | 144223076 | 144232743 '35.2' | 'not assigned.unknown' |
| AC177946.2_FG004 | 1  | 19035272  | 19035748 '35.2'  | 'not assigned.unknown' |
| AC190623.3_FG001 | 3  | 190263687 | 190264151 '35.2' | 'not assigned.unknown' |
| AC234201.1_FG003 | 10 | 149261979 | 149263926 '35.2' | 'not assigned.unknown' |
| GRMZM2G054227    | 8  | 94350707  | 94357372 '35.2'  | 'not assigned.unknown' |
| GRMZM2G056762    | 5  | 191377937 | 191379331 '35.2' | 'not assigned.unknown' |
| GRMZM2G095519    | 1  | 273521470 | 273523502 '35.2' | 'not assigned.unknown' |
| GRMZM2G113775    | 1  | 19629897  | 19634322 '35.2'  | 'not assigned.unknown' |
| GRMZM2G119273    | 3  | 177958138 | 177960261 '35.2' | 'not assigned.unknown' |
| GRMZM2G140917    | 6  | 85627983  | 85636336 '35.2'  | 'not assigned.unknown' |
| GRMZM2G386337    | 6  | 69663122  | 69672416 '35.2'  | 'not assigned.unknown' |

---

F2.ajp13\_mapman\_gabipd\_org) was used to assign genes to functional categories.

---

## Description

---

'weakly similar to ( 166) ATCG00580 | Symbols: PSBE | PSII cytochrome b559. There have been many speculations about the function of Cyt b559, but the most favored at present is that it plays a protective role by acting as an electron acceptor or electron donor under conditions when electron flow through PSII is not optimized. | chrC:64071-64322 REVERSEweakly similar to ( 168) PSBE\_WHEAT Cytochrome b559 alpha subunit (PSII reaction center subunit V) - Triticum aestivum (Wheat)weakly similar to ( 170) loc\_osp1g00520 11562.m00043 protein cytochrome b559 alpha chain seq=cds; coord=3:178389274..178389831:-1; parent\_gene=GRMZM2G062044'

'weakly similar to ( 166) ATCG00580 | Symbols: PSBE | PSII cytochrome b559. There have been many speculations about the function of Cyt b559, but the most favored at present is that it plays a protective role by acting as an electron acceptor or electron donor under conditions when electron flow through PSII is not optimized. | chrC:64071-64322 REVERSEweakly similar to ( 168) PSBE\_WHEAT Cytochrome b559 alpha subunit (PSII reaction center subunit V) - Triticum aestivum (Wheat)weakly similar to ( 170) loc\_osp1g00520 11562.m00043 protein cytochrome b559 alpha chain seq=cds; coord=10:90314158..90316333:-1; parent\_gene=GRMZM2G108467'

'weakly similar to ( 166) ATCG00580 | Symbols: PSBE | PSII cytochrome b559. There have been many speculations about the function of Cyt b559, but the most favored at present is that it plays a protective role by acting as an electron acceptor or electron donor under conditions when electron flow through PSII is not optimized. | chrC:64071-64322 REVERSEweakly similar to ( 168) PSBE\_WHEAT Cytochrome b559 alpha subunit (PSII reaction center subunit V) - Triticum aestivum (Wheat)weakly similar to ( 170) loc\_osp1g00520 11562.m00043 protein cytochrome b559 alpha chain seq=cds; coord=2:200093026..200095298:1; parent\_gene=GRMZM2G117572'

'weakly similar to ( 161) ATCG00580 | Symbols: PSBE | PSII cytochrome b559. There have been many speculations about the function of Cyt b559, but the most favored at present is that it plays a protective role by acting as an electron acceptor or electron donor under conditions when electron flow through PSII is not optimized. | chrC:64071-64322 REVERSEweakly similar to ( 164) PSBE\_WHEAT Cytochrome b559 alpha subunit (PSII reaction center subunit V) - Triticum aestivum (Wheat)weakly similar to ( 166) loc\_osp1g00520 11562.m00043 protein cytochrome b559 alpha chain seq=cds; coord=4:54746363..54748100:-1; parent\_gene=GRMZM2G125575'

'very weakly similar to (82.8) AT1G67740 | Symbols: PSBY, YCF32 | PSBY | chr1:25394429-25394998 REVERSEvery weakly similar to (87.0) PSBY\_SPIOL Photosystem II core complex proteins psbY, chloroplast precursor (L-arginine-metabolizing enzyme) (L-AME) [Contains: Photosystem II protein psbY-1 (psbY-A1); Photosystem II protein psbY-2 (psbY-A2)] - Spinacia oleracea (Spinach)very weakly similar to (96.3) loc\_os08g02630 12008.m61984 protein photosystem II core complex proteins psbY, chloroplast precursor, putative, expressed seq=cds; coord=6:6258660..6259670:-1; parent\_gene=GRMZM2G134130'

'weakly similar to ( 120) ATCG00580 | Symbols: PSBE | PSII cytochrome b559. There have been many speculations about the function of Cyt b559, but the most favored at present is that it plays a protective role by acting as an electron acceptor or electron donor under conditions when electron flow through PSII is not optimized. | chrC:64071-64322 REVERSEweakly similar to ( 120) PSBE\_SOLTU Cytochrome b559 alpha subunit (PSII reaction center subunit V) - Solanum tuberosum (Potato)weakly similar to ( 120) loc\_osp1g00520 11562.m00043 protein cytochrome b559 alpha chain seq=cds; coord=2:110191812..110201806:-1; parent\_gene=GRMZM2G433927'

'highly similar to ( 517) AT5G66190 | Symbols: ATLFNR1 | FNR1 (FERREDOXIN-NADP(+)-OXIDOREDUCTASE 1); NADPH dehydrogenase/ electron transporter, transferring electrons within the cyclic electron transport pathway of photosynthesis/ electron transporter, transferring electrons within the noncyclic electron transp | chr5:26451203-26452616 REVERSEhighly similar to ( 525) FENR1\_ORYSA Ferredoxin--NADP reductase, leaf isozyme, chloroplast precursor (EC 1.18.1.2) (FNR) - *Oryza sativa* (Rice)highly similar to ( 535) loc\_os02g01340 12002.m05484 protein ferredoxin--NADP reductase, leaf isozyme, chloroplast precursor, putative, expressed seq=cds; coord=3:147290518..147292751:-1; parent\_gene=GRMZM2G059083'

'highly similar to ( 528) AT5G66190 | Symbols: ATLFNR1 | FNR1 (FERREDOXIN-NADP(+)-OXIDOREDUCTASE 1); NADPH dehydrogenase/ electron transporter, transferring electrons within the cyclic electron transport pathway of photosynthesis/ electron transporter, transferring electrons within the noncyclic electron transp | chr5:26451203-26452616 REVERSEhighly similar to ( 545) FENR1\_ORYSA Ferredoxin--NADP reductase, leaf isozyme, chloroplast precursor (EC 1.18.1.2) (FNR) - *Oryza sativa* (Rice)highly similar to ( 545) loc\_os06g01850 12006.m04921 protein ferredoxin--NADP reductase, leaf isozyme, chloroplast precursor, putative, expressed seq=cds; coord=8:157455159..157458787:-1; parent\_gene=GRMZM2G059191'

'highly similar to ( 514) AT5G66190 | Symbols: ATLFNR1 | FNR1 (FERREDOXIN-NADP(+)-OXIDOREDUCTASE 1); NADPH dehydrogenase/ electron transporter, transferring electrons within the cyclic electron transport pathway of photosynthesis/ electron transporter, transferring electrons within the noncyclic electron transp | chr5:26451203-26452616 REVERSEhighly similar to ( 530) FENR1\_ORYSA Ferredoxin--NADP reductase, leaf isozyme, chloroplast precursor (EC 1.18.1.2) (FNR) - *Oryza sativa* (Rice)highly similar to ( 530) loc\_os06g01850 12006.m04921 protein ferredoxin--NADP reductase, leaf isozyme, chloroplast precursor, putative, expressed seq=cds; coord=9:27014628..27017016:1; parent\_gene=GRMZM2G168143'

'weakly similar to ( 157) AT5G66190 | Symbols: ATLFNR1 | FNR1 (FERREDOXIN-NADP(+)-OXIDOREDUCTASE 1); NADPH dehydrogenase/ electron transporter, transferring electrons within the cyclic electron transport pathway of photosynthesis/ electron transporter, transferring electrons within the noncyclic electron transp | chr5:26451203-26452616 REVERSEweakly similar to ( 156) FENR1\_ORYSA Ferredoxin--NADP reductase, leaf isozyme, chloroplast precursor (EC 1.18.1.2) (FNR) - *Oryza sativa* (Rice)weakly similar to ( 159) loc\_os02g01340 12002.m05484 protein ferredoxin--NADP reductase, leaf isozyme, chloroplast precursor, putative, expressed seq=cds; coord=10:2690434..2694516:-1; parent\_gene=GRMZM2G320305'

'moderately similar to ( 260) AT5G66190 | Symbols: ATLFNR1 | FNR1 (FERREDOXIN-NADP(+)-OXIDOREDUCTASE 1); NADPH dehydrogenase/ electron transporter, transferring electrons within the cyclic electron transport pathway of photosynthesis/ electron transporter, transferring electrons within the noncyclic electron transp | chr5:26451203-26452616 REVERSEmoderately similar to ( 266) FENR\_MESCR Ferredoxin--NADP reductase, chloroplast precursor (EC 1.18.1.2) (FNR) - *Mesembryanthemum crystallinum* (Common ice plant)moderately similar to ( 265) loc\_os06g01850 12006.m04921 protein ferredoxin--NADP reductase, leaf isozyme, chloroplast precursor, putative, expressed seq=cds; coord=1:278929534..278933203:1; parent\_gene=GRMZM2G395728'

'moderately similar to ( 289) ATCG00490 | Symbols: RBCL | large subunit of RUBISCO. Protein is tyrosine-phosphorylated and its phosphorylation state is modulated in response to ABA in *Arabidopsis thaliana* seeds. | chrC:54958-56397 FORWARDmoderately similar to ( 306) RBL\_MAIZE Ribulose biphosphate carboxylase large chain precursor (EC 4.1.1.39) (RuBisCO large subunit) - *Zea mays* (Maize)moderately similar to ( 307) loc\_os01g58020 12001.m11949 protein ribulose biphosphate carboxylase large chain precursor, putative seq=cds; coord=4:156719448..156720902:-1; parent\_gene=GRMZM2G057171'

'moderately similar to ( 270) ATCG00490 | Symbols: RBCL | large subunit of RUBISCO. Protein is tyrosine-phosphorylated and its phosphorylation state is modulated in response to ABA in *Arabidopsis thaliana* seeds. | chrC:54958-56397 FORWARDmoderately similar to ( 288) RBL\_MAIZE Ribulose biphosphate carboxylase large chain precursor (EC 4.1.1.39) (RuBisCO large subunit) - *Zea mays* (Maize)moderately similar to ( 270) loc\_os01g58020 12001.m11949 protein ribulose biphosphate carboxylase large chain precursor, putative seq=cds; coord=1:207515449..207516025:-1; parent\_gene=GRMZM2G083364'

'moderately similar to ( 238) ATCG00490 | Symbols: RBCL | large subunit of RUBISCO. Protein is tyrosine-phosphorylated and its phosphorylation state is modulated in response to ABA in *Arabidopsis thaliana* seeds. | chrC:54958-56397 FORWARDmoderately similar to ( 257) RBL\_SACOF Ribulose biphosphate carboxylase large chain precursor (EC 4.1.1.39) (RuBisCO large subunit) - *Saccharum officinarum* (Sugarcane)moderately similar to ( 252) loc\_os01g58020 12001.m11949 protein ribulose biphosphate carboxylase large chain precursor, putative seq=cds; coord=6:123912807..123913530:1; parent\_gene=GRMZM2G122563'

'highly similar to ( 502) ATCG00490 | Symbols: RBCL | large subunit of RUBISCO. Protein is tyrosine-phosphorylated and its phosphorylation state is modulated in response to ABA in Arabidopsis thaliana seeds. | chrC:54958-56397 FORWARDhighly similar to ( 545) RBL\_MAIZE Ribulose biphosphate carboxylase large chain precursor (EC 4.1.1.39) (RuBisCO large subunit) - Zea mays (Maize)highly similar to ( 514) loc\_osp1g00420 11562.m00031 protein ribulose 1,5-bisphosphate carboxylase/oxygenase large chain seq=cds; coord=9:32379686..32380603:1; parent\_gene=GRMZM2G308907'

'highly similar to ( 877) ATCG00490 | Symbols: RBCL | large subunit of RUBISCO. Protein is tyrosine-phosphorylated and its phosphorylation state is modulated in response to ABA in Arabidopsis thaliana seeds. | chrC:54958-56397 FORWARDhighly similar to ( 944) RBL\_MAIZE Ribulose biphosphate carboxylase large chain precursor (EC 4.1.1.39) (RuBisCO large subunit) - Zea mays (Maize)highly similar to ( 896) loc\_osp1g00420 11562.m00031 protein ribulose 1,5-bisphosphate carboxylase/oxygenase large chain seq=cds; coord=6:160783975..160786062:1; parent\_gene=GRMZM2G360821'

'highly similar to ( 877) ATCG00490 | Symbols: RBCL | large subunit of RUBISCO. Protein is tyrosine-phosphorylated and its phosphorylation state is modulated in response to ABA in Arabidopsis thaliana seeds. | chrC:54958-56397 FORWARDhighly similar to ( 944) RBL\_MAIZE Ribulose biphosphate carboxylase large chain precursor (EC 4.1.1.39) (RuBisCO large subunit) - Zea mays (Maize)highly similar to ( 896) loc\_osp1g00420 11562.m00031 protein ribulose 1,5-bisphosphate carboxylase/oxygenase large chain seq=cds; coord=2:200096578..200100853:-1; parent\_gene=GRMZM2G385635'

'highly similar to ( 877) ATCG00490 | Symbols: RBCL | large subunit of RUBISCO. Protein is tyrosine-phosphorylated and its phosphorylation state is modulated in response to ABA in Arabidopsis thaliana seeds. | chrC:54958-56397 FORWARDhighly similar to ( 944) RBL\_MAIZE Ribulose biphosphate carboxylase large chain precursor (EC 4.1.1.39) (RuBisCO large subunit) - Zea mays (Maize)highly similar to ( 896) loc\_osp1g00420 11562.m00031 protein ribulose 1,5-bisphosphate carboxylase/oxygenase large chain seq=cds; coord=1:203925927..203931405:-1; parent\_gene=GRMZM2G448344'

'moderately similar to ( 411) AT5G61410 | Symbols: RPE | RPE; catalytic/ ribulose-phosphate 3-epimerase | chr5:24684085-24685836 REVERSEmoderately similar to ( 449) RPE\_ORYSA Ribulose-phosphate 3-epimerase, chloroplast precursor (EC 5.1.3.1) (Pentose-5-phosphate 3-epimerase) (PPE) (RPE) (R5P3E) - Oryza sativa (Rice)moderately similar to ( 449) loc\_os03g07300 12003.m101203 protein ribulose-phosphate 3-epimerase, chloroplast precursor, putative, expressed seq=cds; coord=1:14624231..14639380:1; parent\_gene=GRMZM2G026807'

'moderately similar to ( 432) AT5G61410 | Symbols: RPE | RPE; catalytic/ ribulose-phosphate 3-epimerase | chr5:24684085-24685836 REVERSEmoderately similar to ( 470) RPE\_ORYSA Ribulose-phosphate 3-epimerase, chloroplast precursor (EC 5.1.3.1) (Pentose-5-phosphate 3-epimerase) (PPE) (RPE) (R5P3E) - Oryza sativa (Rice)moderately similar to ( 470) loc\_os03g07300 12003.m101203 protein ribulose-phosphate 3-epimerase, chloroplast precursor, putative, expressed seq=cds; coord=9:151316118..151319993:-1; parent\_gene=GRMZM2G178960'

'highly similar to ( 629) AT1G32060 | Symbols: PRK | PRK (PHOSPHORIBULOKINASE); ATP binding / phosphoribulokinase/ protein binding | chr1:11532668-11534406 FORWARDhighly similar to ( 692) KPPR\_WHEAT Phosphoribulokinase, chloroplast precursor (EC 2.7.1.19) (Phosphopentokinase) (PRKase) (PRK) - Triticum aestivum (Wheat)highly similar to ( 702) loc\_os02g47020 12002.m09738 protein phosphoribulokinase, chloroplast precursor, putative, expressed seq=cds; coord=4:158993661..158996579:-1; parent\_gene=GRMZM2G026024'

'highly similar to ( 639) AT1G32060 | Symbols: PRK | PRK (PHOSPHORIBULOKINASE); ATP binding / phosphoribulokinase/ protein binding | chr1:11532668-11534406 FORWARDhighly similar to ( 733) KPPR\_WHEAT Phosphoribulokinase, chloroplast precursor (EC 2.7.1.19) (Phosphopentokinase) (PRKase) (PRK) - Triticum aestivum (Wheat)highly similar to ( 735) loc\_os02g47020 12002.m09738 protein phosphoribulokinase, chloroplast precursor, putative, expressed seq=cds; coord=5:199592727..199595057:1; parent\_gene=GRMZM2G162529'

'moderately similar to ( 307) AT1G32060 | Symbols: PRK | PRK (PHOSPHORIBULOKINASE); ATP binding / phosphoribulokinase/ protein binding | chr1:11532668-11534406 FORWARDmoderately similar to ( 315) KPPR\_MESCR Phosphoribulokinase, chloroplast precursor (EC 2.7.1.19) (Phosphopentokinase) (PRKase) (PRK) - Mesembryanthemum crystallinum (Common ice plant)moderately similar to ( 319) loc\_os02g47020 12002.m09738 protein phosphoribulokinase, chloroplast precursor, putative, expressed seq=cds; coord=2:12897470..12899787:1; parent\_gene=GRMZM2G463280'

'moderately similar to ( 228) AT1G67090 | Symbols: RBCS1A | RBCS1A (RIBULOSE BISPHOSPHATE CARBOXYLASE SMALL CHAIN 1A); copper ion binding / ribulose-bisphosphate carboxylase | chr1:25048590-25049249 REVERSEmoderately similar to ( 357) RBS\_MAIZE Ribulose bisphosphate carboxylase small chain, chloroplast precursor (EC 4.1.1.39) (RuBisCO small subunit) - Zea mays (Maize)moderately similar to ( 281) loc\_os12g19381 12012.m27010 protein ribulose biphosphate carboxylase small chain C, chloroplast precursor, putative, expressed seq=cds; coord=4:190051325..190053766:-1; parent\_gene=GRMZM2G098520'

'moderately similar to ( 228) AT1G67090 | Symbols: RBCS1A | RBCS1A (RIBULOSE BISPHOSPHATE CARBOXYLASE SMALL CHAIN 1A); copper ion binding / ribulose-bisphosphate carboxylase | chr1:25048590-25049249 REVERSEmoderately similar to ( 344) RBS\_MAIZE Ribulose bisphosphate carboxylase small chain, chloroplast precursor (EC 4.1.1.39) (RuBisCO small subunit) - Zea mays (Maize)moderately similar to ( 283) loc\_os12g19381 12012.m27010 protein ribulose biphosphate carboxylase small chain C, chloroplast precursor, putative, expressed seq=cds; coord=2:142794871..142796060:1; parent\_gene=GRMZM2G113033'

'weakly similar to ( 137) AT3G12780 | Symbols: PGK1 | PGK1 (PHOSPHOGLYCERATE KINASE 1); phosphoglycerate kinase | chr3:4061127-4063140 REVERSEweakly similar to ( 137) PGKH\_SPIOL Phosphoglycerate kinase, chloroplast precursor (EC 2.7.2.3) (Fragment) - Spinacia oleracea (Spinach)highly similar to ( 739) loc\_os10g30550 12010.m05915 protein phosphoglycerate kinase, chloroplast precursor, putative, expressed seq=cds; coord=1:237458102..237487302:1; parent\_gene=GRMZM2G003724'

'moderately similar to ( 376) AT1G56190 | Symbols: | phosphoglycerate kinase, putative | chr1:21028622-21030454 FORWARDmoderately similar to ( 385) PGKH\_TOBAC Phosphoglycerate kinase, chloroplast precursor (EC 2.7.2.3) - Nicotiana tabacum (Common tobacco)moderately similar to ( 397) loc\_os05g41640 12005.m08338 protein phosphoglycerate kinase, chloroplast precursor, putative, expressed seq=cds; coord=3:188318910..188325562:-1; parent\_gene=GRMZM2G047028'

'highly similar to ( 715) AT1G56190 | Symbols: | phosphoglycerate kinase, putative | chr1:21028622-21030454 FORWARDhighly similar to ( 752) PGKH\_WHEAT Phosphoglycerate kinase, chloroplast precursor (EC 2.7.2.3) - Triticum aestivum (Wheat)highly similar to ( 765) loc\_os05g41640 12005.m08338 protein phosphoglycerate kinase, chloroplast precursor, putative, expressed seq=cds; coord=8:120773908..120778906:-1; parent\_gene=GRMZM2G083016'

'highly similar to ( 718) AT1G56190 | Symbols: | phosphoglycerate kinase, putative | chr1:21028622-21030454 FORWARDhighly similar to ( 761) PGKH\_WHEAT Phosphoglycerate kinase, chloroplast precursor (EC 2.7.2.3) - Triticum aestivum (Wheat)highly similar to ( 778) loc\_os05g41640 12005.m08338 protein phosphoglycerate kinase, chloroplast precursor, putative, expressed seq=cds; coord=6:156256123..156258890:-1; parent\_gene=GRMZM2G089136'

'highly similar to ( 656) AT1G79550 | Symbols: PGK | PGK (PHOSPHOGLYCERATE KINASE); phosphoglycerate kinase | chr1:29924347-29926295 REVERSEhighly similar to ( 694) PGKY\_WHEAT Phosphoglycerate kinase, cytosolic (EC 2.7.2.3) - Triticum aestivum (Wheat)highly similar to ( 707) loc\_os02g07260 12002.m33575 protein phosphoglycerate kinase, cytosolic, putative, expressed seq=cds; coord=5:84822215..84825942:1; parent\_gene=GRMZM2G382914'

'highly similar to ( 895) AT2G24270 | Symbols: ALDH11A3 | ALDH11A3; 3-chloroallyl aldehyde dehydrogenase/ glyceraldehyde-3-phosphate dehydrogenase (NADP+) | chr2:10327325-10329601 REVERSEhighly similar to ( 979) GAPN\_MAIZE NADP-dependent glyceraldehyde-3-phosphate dehydrogenase (EC 1.2.1.9) (Non-phosphorylating glyceraldehyde 3-phosphate dehydrogenase) (Glyceraldehyde-3-phosphate dehydrogenase [NADP+]) (Triosephosphate dehydrogenase) - Zea mays (Maize)highly similar to ( 959) loc\_os08g34210 12008.m26702 protein NADP-dependent glyceraldehyde-3-phosphate dehydrogenase, putative, expressed seq=cds; coord=4:84106470..84111628:-1; parent\_gene=GRMZM2G035268'

'highly similar to ( 575) AT3G26650 | Symbols: GAPA, GAPA-1 | GAPA (GLYCERALDEHYDE 3-PHOSPHATE DEHYDROGENASE A SUBUNIT); glyceraldehyde-3-phosphate dehydrogenase/ protein binding | chr3:9795226-9796848 FORWARDhighly similar to ( 670) G3PA\_MAIZE Glyceraldehyde-3-phosphate dehydrogenase A, chloroplast precursor (EC 1.2.1.13) (NADP-dependent glyceraldehydophosphate dehydrogenase subunit A) - Zea mays (Maize)highly similar to ( 648) loc\_os04g38600 12004.m35146 protein glyceraldehyde-3-phosphate dehydrogenase A, chloroplast precursor, putative, expressed seq=cds; coord=10:122379626..122381446:1; parent\_gene=GRMZM2G039723'



'highly similar to ( 582) AT3G26650 | Symbols: GAPA, GAPA-1 | GAPA (GLYCERALDEHYDE 3-PHOSPHATE DEHYDROGENASE A SUBUNIT); glyceraldehyde-3-phosphate dehydrogenase/ protein binding | chr3:9795226-9796848 FORWARDhighly similar to ( 680) G3PA\_MAIZE Glyceraldehyde-3-phosphate dehydrogenase A, chloroplast precursor (EC 1.2.1.13) (NADP-dependent glyceraldehydophosphate dehydrogenase subunit A) - Zea mays (Maize)highly similar to ( 658) loc\_os04g38600 12004.m35146 protein glyceraldehyde-3-phosphate dehydrogenase A, chloroplast precursor, putative, expressed seq=cds; coord=10:122532025..122533813:1; parent\_gene=GRMZM2G162845'

'moderately similar to ( 371) AT1G12900 | Symbols: GAPA-2 | GAPA-2 (GLYCERALDEHYDE 3-PHOSPHATE DEHYDROGENASE A SUBUNIT 2); NADH binding / binding / catalytic/ glyceraldehyde-3-phosphate dehydrogenase (phosphorylating)/ glyceraldehyde-3-phosphate dehydrogenase | chr1:4392634-4393850 REVERSEmoderately similar to ( 473) G3PA\_MAIZE Glyceraldehyde-3-phosphate dehydrogenase A, chloroplast precursor (EC 1.2.1.13) (NADP-dependent glyceraldehydophosphate dehydrogenase subunit A) - Zea mays (Maize)moderately similar to ( 456) loc\_os04g38600 12004.m35146 protein glyceraldehyde-3-phosphate dehydrogenase A, chloroplast precursor, putative, expressed seq=cds; coord=2:42258081..42259297:-1; parent\_gene=GRMZM2G337113'

'moderately similar to ( 439) AT2G21170 | Symbols: TIM | TIM (TRIOSEPHOSPHATE ISOMERASE); catalytic/ triose-phosphate isomerase | chr2:9071047-9073106 REVERSEmoderately similar to ( 478) TPIC\_SECCE Triosephosphate isomerase, chloroplast precursor (EC 5.3.1.1) (TIM) (Triose-phosphate isomerase) - Secale cereale (Rye)highly similar to ( 523) loc\_os09g36450 12009.m060049 protein triosephosphate isomerase, chloroplast precursor, putative, expressed seq=cds; coord=2:195920737..195924614:-1; parent\_gene=GRMZM2G002807'

'highly similar to ( 629) AT4G38970 | Symbols: | fructose-bisphosphate aldolase, putative | chr4:18163769-18165659 REVERSEhighly similar to ( 710) ALFC\_ORYSA Fructose-bisphosphate aldolase, chloroplast precursor (EC 4.1.2.13) (ALDP) - Oryza sativa (Rice)highly similar to ( 710) loc\_os11g07020 12011.m28744 protein fructose-bisphosphate aldolase, chloroplast precursor, putative, expressed seq=cds; coord=10:10194502..10196450:-1; parent\_gene=GRMZM2G046284'

'highly similar to ( 607) AT2G01140 | Symbols: | fructose-bisphosphate aldolase, putative | chr2:95006-96491 REVERSEhighly similar to ( 561) ALFC\_PEA Fructose-bisphosphate aldolase 1, chloroplast precursor (EC 4.1.2.13) (Fragment) - Pisum sativum (Garden pea)highly similar to ( 672) loc\_os01g02880 12001.m06927 protein fructose-bisphosphate aldolase, chloroplast precursor, putative, expressed seq=cds; coord=8:9901033..9904862:-1; parent\_gene=GRMZM2G069195'

'highly similar to ( 630) AT2G01140 | Symbols: | fructose-bisphosphate aldolase, putative | chr2:95006-96491 REVERSEhighly similar to ( 582) ALFC\_PEA Fructose-bisphosphate aldolase 1, chloroplast precursor (EC 4.1.2.13) (Fragment) - Pisum sativum (Garden pea)highly similar to ( 710) loc\_os01g02880 12001.m06927 protein fructose-bisphosphate aldolase, chloroplast precursor, putative, expressed seq=cds; coord=3:27391353..27395051:1; parent\_gene=GRMZM2G089365'

'highly similar to ( 624) AT4G38970 | Symbols: | fructose-bisphosphate aldolase, putative | chr4:18163769-18165659 REVERSEhighly similar to ( 665) ALFC\_ORYSA Fructose-bisphosphate aldolase, chloroplast precursor (EC 4.1.2.13) (ALDP) - Oryza sativa (Rice)highly similar to ( 665) loc\_os11g07020 12011.m28744 protein fructose-bisphosphate aldolase, chloroplast precursor, putative, expressed seq=cds; coord=4:204599067..204601053:-1; parent\_gene=GRMZM2G155253'

'weakly similar to ( 160) AT2G01140 | Symbols: | fructose-bisphosphate aldolase, putative | chr2:95006-96491 REVERSEweakly similar to ( 143) ALFD\_PEA Fructose-bisphosphate aldolase 2, chloroplast (EC 4.1.2.13) - Pisum sativum (Garden pea)weakly similar to ( 170) loc\_os01g02880 12001.m06927 protein fructose-bisphosphate aldolase, chloroplast precursor, putative, expressed seq=cds; coord=5:145007924..145010718:-1; parent\_gene=GRMZM2G407406'

'highly similar to ( 585) AT3G54050 | Symbols: | fructose-1,6-bisphosphatase, putative / D-fructose-1,6-bisphosphate 1-phosphohydrolase, putative / FB Pase, putative | chr3:20016951-20018527 FORWARDhighly similar to ( 647) F16P1\_ORYSA Fructose-1,6-bisphosphatase, chloroplast precursor (EC 3.1.3.11) (D-fructose-1,6-bisphosphate 1-phosphohydrolase) (FB Pase) - Oryza sativa (Rice)highly similar to ( 647) loc\_os03g16050 12003.m07042 protein fructose-1,6-bisphosphatase, chloroplast precursor, putative, expressed seq=cds; coord=1:38848595..38850785:-1; parent\_gene=GRMZM2G306732'

'weakly similar to ( 164) AT1G43670 | Symbols: | fructose-1,6-bisphosphatase, putative / D-fructose-1,6-bisphosphate 1-phosphohydrolase, putative / FBPase, putative | chr1:16468184-16470347 FORWARDweakly similar to ( 166) F16P2\_SACHY Fructose-1,6-bisphosphatase, cytosolic (EC 3.1.3.11) (D-fructose-1,6-bisphosphate 1-phosphohydrolase) (FBPase) - Saccharum hybrid (Sugarcane)weakly similar to ( 171) loc\_os05g36270 12005.m083730 protein fructose-1,6-bisphosphatase, cytosolic, putative, expressed seq=cds; coord=8:100871386..100872445:-1; parent\_gene=GRMZM2G322953'

'nearly identical (1041) AT2G45290 | Symbols: | transketolase, putative | chr2:18672737-18675589 FORWARDnearly identical (1063) TKTC\_SOLTU Transketolase, chloroplast precursor (EC 2.2.1.1) (TK) - Solanum tuberosum (Potato)nearly identical (1149) loc\_os04g19740 12004.m07133 protein transketolase, chloroplast precursor, putative, expressed seq=cds; coord=2:86650928..86654660:1; parent\_gene=GRMZM2G010494'

'nearly identical (1148) AT3G60750 | Symbols: | transketolase, putative | chr3:22454004-22456824 FORWARDnearly identical (1289) TKTC\_MAIZE Transketolase, chloroplast (EC 2.2.1.1) (TK) - Zea mays (Maize)nearly identical (1204) loc\_os06g04270 12006.m05156 protein transketolase, chloroplast precursor, putative, expressed seq=cds; coord=9:22779373..22783918:1; parent\_gene=GRMZM2G033208'

'weakly similar to ( 181) AT3G55800 | Symbols: SBPASE | SBPASE (sedoheptulose-bisphosphatase); phosphoric ester hydrolase/ sedoheptulose-bisphosphatase | chr3:20709640-20711421 FORWARDmoderately similar to ( 253) S17P\_WHEAT Sedoheptulose-1,7-bisphosphatase, chloroplast precursor (EC 3.1.3.37) (Sedoheptulose-bisphosphatase) (SBPase) (SED(1,7)P2ase) - Triticum aestivum (Wheat)moderately similar to ( 263) loc\_os04g16680 12004.m06845 protein sedoheptulose-1,7-bisphosphatase, chloroplast precursor, putative, expressed seq=cds; coord=3:178846540..178848005:-1; parent\_gene=AC147602.5\_FG004'

'nearly identical (1584) AT3G14940 | Symbols: ATPPC3 | ATPPC3 (PHOSPHOENOLPYRUVATE CARBOXYLASE 3); phosphoenolpyruvate carboxylase | chr3:5025584-5029476 FORWARDnearly identical (1845) CAPP1\_SORBI Phosphoenolpyruvate carboxylase 1 (EC 4.1.1.31) (PEPCase 1) (PEPC 1) (CP21) - Sorghum bicolor (Sorghum) (Sorghum vulgare)nearly identical (1788) loc\_os02g14770 12002.m100156 protein phosphoenolpyruvate carboxylase 1, putative, expressed seq=cds; coord=5:144808460..144816059:-1; parent\_gene=GRMZM2G069542'

'nearly identical (1590) AT1G53310 | Symbols: ATPPC1 | ATPPC1 (PHOSPHOENOLPYRUVATE CARBOXYLASE 1); catalytic/ phosphoenolpyruvate carboxylase | chr1:19884261-19888070 REVERSEnearly identical (1848) CAPP1\_SORBI Phosphoenolpyruvate carboxylase 1 (EC 4.1.1.31) (PEPCase 1) (PEPC 1) (CP21) - Sorghum bicolor (Sorghum) (Sorghum vulgare)nearly identical (1797) loc\_os02g14770 12002.m100156 protein phosphoenolpyruvate carboxylase 1, putative, expressed seq=cds; coord=4:227269225..227280511:-1; parent\_gene=GRMZM2G074122'

'nearly identical (1378) AT1G68750 | Symbols: ATPPC4 | ATPPC4; phosphoenolpyruvate carboxylase | chr1:25822942-25828104 REVERSEhighly similar to ( 618) CAPP2\_CHLRE Phosphoenolpyruvate carboxylase 2 (EC 4.1.1.31) (PEP carboxylase 2) (PEPCase 2) (PEPC 2) - Chlamydomonas reinhardtinearly identical (1632) loc\_os01g02050 12001.m06847 protein phosphoenolpyruvate carboxylase 4, putative, expressed seq=cds; coord=3:29055457..29063476:-1; parent\_gene=GRMZM2G082780'

'nearly identical (1508) AT2G42600 | Symbols: ATPPC2 | ATPPC2 (PHOSPHOENOLPYRUVATE CARBOXYLASE 2); catalytic/ phosphoenolpyruvate carboxylase | chr2:17734541-17738679 REVERSEnearly identical (1912) CAPP1\_MAIZE Phosphoenolpyruvate carboxylase 1 (EC 4.1.1.31) (PEPCase 1) (PEPC 1) - Zea mays (Maize)nearly identical (1566) loc\_os02g14770 12002.m100156 protein phosphoenolpyruvate carboxylase 1, putative, expressed seq=cds; coord=9:61296279..61301686:1; parent\_gene=GRMZM2G083841'

'highly similar to ( 842) AT1G79750 | Symbols: ATNADP-ME4 | ATNADP-ME4 (NADP-malic enzyme 4); malate dehydrogenase (oxaloacetate-decarboxylating) (NADP+)/ malic enzyme/ oxidoreductase, acting on NADH or NADPH, NAD or NADP as acceptor | chr1:30007655-30011179 REVERSEnearly identical (1136) MAOC\_MAIZE NADP-dependent malic enzyme, chloroplast precursor (EC 1.1.1.40) (NADP-ME) - Zea mays (Maize)highly similar to ( 947) loc\_os01g09320 12001.m07557 protein NADP-dependent malic enzyme, chloroplast precursor, putative, expressed seq=cds; coord=3:7275169..7280519:1; parent\_gene=GRMZM2G085019'

'highly similar to ( 784) AT4G00570 | Symbols: | malate oxidoreductase, putative | chr4:242817-246522 REVERSEhighly similar to ( 797) MAON\_SOLTU NAD-dependent malic enzyme 59 kDa isoform, mitochondrial precursor (EC 1.1.1.39) (NAD-ME) - Solanum tuberosum (Potato)highly similar to ( 968) loc\_os10g35960 12010.m50425 protein NAD-dependent malic enzyme 59 kDa isoform, mitochondrial precursor, putative, expressed seq=cds; coord=5:23896374..23903276:-1; parent\_gene=GRMZM2G085747'

'nearly identical (1434) AT4G15530 | Symbols: PPKD | PPKD (pyruvate orthophosphate dikinase); kinase/ pyruvate, phosphate dikinase | chr4:8864828-8870748 REVERSEnearly identical (1684) PPKD\_MAIZE Pyruvate, phosphate dikinase, chloroplast precursor (EC 2.7.9.1) (Pyruvate, orthophosphate dikinase) - Zea mays (Maize)nearly identical (1625) loc\_os05g33570 12005.m083718 protein pyruvate, phosphate dikinase, chloroplast precursor, putative, expressed seq=cds; coord=8:107003965..107014830:1; parent\_gene=GRMZM2G097457'

'nearly identical (1637) AT3G14940 | Symbols: ATPPC3 | ATPPC3 (PHOSPHOENOLPYRUVATE CARBOXYLASE 3); phosphoenolpyruvate carboxylase | chr3:5025584-5029476 FORWARDnearly identical (1880) CAPP1\_SACHY Phosphoenolpyruvate carboxylase, housekeeping isozyme (EC 4.1.1.31) (PEPCase) (PEPC) - Saccharum hybrid (Sugarcane)nearly identical (1692) loc\_os01g55350 12001.m11694 protein phosphoenolpyruvate carboxylase, housekeeping isozyme, putative, expressed seq=cds; coord=8:173702854..173715423:1; parent\_gene=GRMZM2G110714'

'highly similar to ( 875) AT2G19900 | Symbols: ATNADP-ME1 | ATNADP-ME1 (NADP-malic enzyme 1); malate dehydrogenase (oxaloacetate-decarboxylating) (NADP+)/ malic enzyme/ oxidoreductase, acting on NADH or NADPH, NAD or NADP as acceptor | chr2:8592106-8595403 REVERSEhighly similar to ( 895) MAOX\_VITVI NADP-dependent malic enzyme (EC 1.1.1.40) (NADP-ME) - Vitis vinifera (Grape)nearly identical (1007) loc\_os01g54030 12001.m11567 protein NADP-dependent malic enzyme, putative, expressed seq=cds; coord=8:175058638..175063179:-1; parent\_gene=GRMZM2G118770'

'moderately similar to ( 245) AT5G14740 | Symbols: CA2, CA18, BETA CA2 | CA2 (CARBONIC ANHYDRASE 2); carbonate dehydratase/ zinc ion binding | chr5:4758257-4762315 FORWARDmoderately similar to ( 340) CAHC\_HORVU Carbonic anhydrase, chloroplast precursor (EC 4.2.1.1) (Carbonate dehydratase) - Hordeum vulgare (Barley)moderately similar to ( 340) loc\_os01g45274 12001.m150428 protein carbonic anhydrase, chloroplast precursor, putative, expressed seq=cds; coord=3:215466579..215473931:-1; parent\_gene=GRMZM2G121878'

'highly similar to ( 838) AT1G79750 | Symbols: ATNADP-ME4 | ATNADP-ME4 (NADP-malic enzyme 4); malate dehydrogenase (oxaloacetate-decarboxylating) (NADP+)/ malic enzyme/ oxidoreductase, acting on NADH or NADPH, NAD or NADP as acceptor | chr1:30007655-30011179 REVERSEhighly similar to ( 944) MAOC\_ORYSA NADP-dependent malic enzyme, chloroplast precursor (EC 1.1.1.40) (NADP-ME) - Oryza sativa (Rice)highly similar to ( 944) loc\_os01g09320 12001.m07557 protein NADP-dependent malic enzyme, chloroplast precursor, putative, expressed seq=cds; coord=6:139275339..139281024:1; parent\_gene=GRMZM2G122479'

'highly similar to ( 940) AT5G11670 | Symbols: ATNADP-ME2 | ATNADP-ME2 (NADP-malic enzyme 2); malate dehydrogenase (oxaloacetate-decarboxylating) (NADP+)/ malic enzyme/ oxidoreductase, acting on NADH or NADPH, NAD or NADP as acceptor | chr5:3754456-3758040 FORWARDhighly similar to ( 977) MAOX\_VITVI NADP-dependent malic enzyme (EC 1.1.1.40) (NADP-ME) - Vitis vinifera (Grape)nearly identical (1080) loc\_os01g52500 12001.m42715 protein NADP-dependent malic enzyme, putative, expressed seq=cds; coord=3:201684716..201689628:-1; parent\_gene=GRMZM2G159724'

'moderately similar to ( 260) AT5G14740 | Symbols: CA2, CA18, BETA CA2 | CA2 (CARBONIC ANHYDRASE 2); carbonate dehydratase/ zinc ion binding | chr5:4758257-4762315 FORWARDmoderately similar to ( 338) CAHC\_HORVU Carbonic anhydrase, chloroplast precursor (EC 4.2.1.1) (Carbonate dehydratase) - Hordeum vulgare (Barley)moderately similar to ( 331) loc\_os01g45274 12001.m150428 protein carbonic anhydrase, chloroplast precursor, putative, expressed seq=cds; coord=3:215424737..215427767:-1; parent\_gene=GRMZM2G348512'

'highly similar to ( 884) AT2G13560 | Symbols: | malate oxidoreductase, putative | chr2:5650089-5655103 FORWARDhighly similar to ( 884) MAOM\_SOLTU NAD-dependent malic enzyme 62 kDa isoform, mitochondrial precursor (EC 1.1.1.39) (NAD-ME) - Solanum tuberosum (Potato)nearly identical (1017) loc\_os07g31380 12007.m07407 protein NAD-dependent malic enzyme 62 kDa isoform, mitochondrial precursor, putative, expressed seq=cds; coord=7:150290285..150300500:-1; parent\_gene=GRMZM2G406672'

'moderately similar to ( 322) AT5G11670 | Symbols: ATNADP-ME2 | ATNADP-ME2 (NADP-malic enzyme 2); malate dehydrogenase (oxaloacetate-decarboxylating) (NADP+)/ malic enzyme/ oxidoreductase, acting on NADH or NADPH, NAD or NADP as acceptor | chr5:3754456-3758040 FORWARDmoderately similar to ( 322) MAOX\_PHAVU NADP-dependent malic enzyme (EC 1.1.1.40) (NADP-ME) - Phaseolus vulgaris (Kidney bean) (French bean)moderately similar to ( 342) loc\_os01g52500 12001.m42715 protein NADP-dependent malic enzyme, putative, expressed seq=cds; coord=1:283454836..283456687:-1; parent\_gene=GRMZM2G461332'

'nearly identical (1636) AT1G53310 | Symbols: ATPPC1 | ATPPC1 (PHOSPHOENOLPYRUVATE CARBOXYLASE 1); catalytic/ phosphoenolpyruvate carboxylase | chr1:19884261-19888070 REVERSEnearly identical (1864) CAPP2\_MAIZE Phosphoenolpyruvate carboxylase 2 (EC 4.1.1.31) (PEPCase 2) (PEPC 2) - Zea mays (Maize)nearly identical (1765) loc\_os09g14670 12009.m04730 protein phosphoenolpyruvate carboxylase 2, putative, expressed seq=cds; coord=7:86433388..86439128:-1; parent\_gene=GRMZM2G473001'

'very weakly similar to (90.9) AT5G11670 | Symbols: ATNADP-ME2 | ATNADP-ME2 (NADP-malic enzyme 2); malate dehydrogenase (oxaloacetate-decarboxylating) (NADP+)/ malic enzyme/ oxidoreductase, acting on NADH or NADPH, NAD or NADP as acceptor | chr5:3754456-3758040 FORWARDvery weakly similar to (95.1) MAOX\_MESCR NADP-dependent malic enzyme (EC 1.1.1.40) (NADP-ME) - Mesembryanthemum crystallinum (Common ice plant)very weakly similar to (91.7) loc\_os01g54030 12001.m11567 protein NADP-dependent malic enzyme, putative, expressed seq=cds; coord=6:102073554..102077523:1; parent\_gene=AC226723.2\_FG001'

'nearly identical (1037) AT4G10120 | Symbols: ATSPS4F | ATSPS4F; transferase, transferring glycosyl groups | chr4:6315033-6319785 FORWARDhighly similar to ( 944) SPS\_MAIZE Sucrose-phosphate synthase (EC 2.4.1.14) (UDP-glucose-fructose-phosphate glucosyltransferase) - Zea mays (Maize)nearly identical (1494) loc\_os11g12810 12011.m05473 protein sucrose-phosphate synthase, putative, expressed seq=cds; coord=4:10479235..10485174:-1; parent\_gene=GRMZM2G008507'

'highly similar to ( 839) AT5G20280 | Symbols: ATSPS1F | ATSPS1F (sucrose phosphate synthase 1F); sucrose-phosphate synthase/ transferase, transferring glycosyl groups | chr5:6844994-6849997 REVERSEhighly similar to ( 845) SPS\_SOLTU Sucrose-phosphate synthase (EC 2.4.1.14) (UDP-glucose-fructose-phosphate glucosyltransferase) - Solanum tuberosum (Potato)nearly identical (1611) loc\_os06g43630 12006.m08893 protein sucrose-phosphate synthase 1, putative, expressed seq=cds; coord=9:94333500..94352269:1; parent\_gene=GRMZM2G049076'

'nearly identical (1327) AT5G20280 | Symbols: ATSPS1F | ATSPS1F (sucrose phosphate synthase 1F); sucrose-phosphate synthase/ transferase, transferring glycosyl groups | chr5:6844994-6849997 REVERSEnearly identical (1343) SPS\_SOLTU Sucrose-phosphate synthase (EC 2.4.1.14) (UDP-glucose-fructose-phosphate glucosyltransferase) - Solanum tuberosum (Potato)nearly identical (1766) loc\_os08g20660 12008.m26651 protein sucrose-phosphate synthase 1, putative, expressed seq=cds; coord=4:65261557..65280118:-1; parent\_gene=GRMZM2G055331'

'nearly identical (1379) AT1G04920 | Symbols: ATSPS3F | ATSPS3F (sucrose phosphate synthase 3F); sucrose-phosphate synthase/ transferase, transferring glycosyl groups | chr1:1391674-1395756 REVERSEnearly identical (1933) SPS\_MAIZE Sucrose-phosphate synthase (EC 2.4.1.14) (UDP-glucose-fructose-phosphate glucosyltransferase) - Zea mays (Maize)nearly identical (1724) loc\_os01g69030 12001.m150823 protein sucrose-phosphate synthase, putative, expressed seq=cds; coord=3:161252718..161258340:1; parent\_gene=GRMZM2G140107'

'nearly identical (1061) AT5G20280 | Symbols: ATSPS1F | ATSPS1F (sucrose phosphate synthase 1F); sucrose-phosphate synthase/ transferase, transferring glycosyl groups | chr5:6844994-6849997 REVERSEnearly identical (1081) SPS\_SPIOL Sucrose-phosphate synthase (EC 2.4.1.14) (UDP-glucose-fructose-phosphate glucosyltransferase) - Spinacia oleracea (Spinach)nearly identical (1757) loc\_os02g09170 12002.m100124 protein sucrose-phosphate synthase 1, putative, expressed seq=cds; coord=5:96354714..96362409:1; parent\_gene=GRMZM2G462613'

'highly similar to ( 588) AT5G20280 | Symbols: ATSPS1F | ATSPS1F (sucrose phosphate synthase 1F); sucrose-phosphate synthase/ transferase, transferring glycosyl groups | chr5:6844994-6849997 REVERSEhighly similar to ( 598) SPS\_SOLTU Sucrose-phosphate synthase (EC 2.4.1.14) (UDP-glucose-fructose-phosphate glucosyltransferase) - Solanum tuberosum (Potato)nearly identical (1242) loc\_os06g43630 12006.m08893 protein sucrose-phosphate synthase 1, putative, expressed seq=cds; coord=6:96905196..96916140:1; parent\_gene=GRMZM2G471083'

'highly similar to ( 537) AT2G35840 | Symbols: | sucrose-phosphatase 1 (SPP1) | chr2:15053952-15055776 FORWARDhighly similar to ( 758) loc\_os01g27880 12001.m43018 protein sucrose phosphate synthase, putative, expressed seq=cds; coord=8:116304892..116311147:-1; parent\_gene=GRMZM2G055489'

'moderately similar to ( 442) AT2G35840 | Symbols: | sucrose-phosphatase 1 (SPP1) | chr2:15053952-15055776 FORWARDhighly similar to ( 620) loc\_os05g05270 12005.m05054 protein sucrose phosphate synthase, putative, expressed seq=cds; coord=10:89417140..89420265:1; parent\_gene=GRMZM2G097641'

'highly similar to ( 639) AT1G27680 | Symbols: APL2 | APL2 (ADPGLC-PPASE LARGE SUBUNIT); glucose-1-phosphate adenyltransferase | chr1:9631630-9634450 FORWARDhighly similar to ( 957) GLGL2\_MAIZE Glucose-1-phosphate adenyltransferase large subunit 2, chloroplast precursor (EC 2.7.7.27) (ADP-glucose synthase) (ADP-glucose pyrophosphorylase) (AGPase S) (Alpha-D-glucose-1-phosphate adenyl transferase) - Zea mays (Maize)highly similar to ( 947) loc\_os05g50380 12005.m083822 protein glucose-1-phosphate adenyltransferase large subunit, chloroplast precursor, putative, expressed seq=cds; coord=6:166587013..166592611:1; parent\_gene=GRMZM2G027955'

'highly similar to ( 804) AT5G48300 | Symbols: ADG1, APS1 | ADG1 (ADP GLUCOSE PYROPHOSPHORYLASE 1); glucose-1-phosphate adenyltransferase | chr5:19570326-19572557 FORWARDhighly similar to ( 833) GLGS\_WHEAT Glucose-1-phosphate adenyltransferase small subunit, chloroplast precursor (EC 2.7.7.27) (ADP-glucose synthase) (ADP-glucose pyrophosphorylase) (AGPase B) (Alpha-D-glucose-1-phosphate adenyl transferase) Triticum aestivum (Wheat)highly similar to ( 838) loc\_os08g25734 12008.m06589 protein glucose-1-phosphate adenyltransferase small subunit, chloroplast precursor, putative, expressed seq=cds; coord=4:58954361..58960521:-1; parent\_gene=GRMZM2G068506'

'highly similar to ( 821) AT5G48300 | Symbols: ADG1, APS1 | ADG1 (ADP GLUCOSE PYROPHOSPHORYLASE 1); glucose-1-phosphate adenyltransferase | chr5:19570326-19572557 FORWARDhighly similar to ( 828) GLGS\_HORVU Glucose-1-phosphate adenyltransferase small subunit, chloroplast precursor (EC 2.7.7.27) (ADP-glucose synthase) (ADP-glucose pyrophosphorylase) (AGPase B) (Alpha-D-glucose-1-phosphate adenyl transferase) Hordeum vulgare (Barley)highly similar to ( 870) loc\_os09g12660 12009.m21978 protein glucose-1-phosphate adenyltransferase small subunit, chloroplast precursor, putative, expressed seq=cds; coord=2:173380725..173391388:-1; parent\_gene=GRMZM2G106213'

'highly similar to ( 640) AT1G27680 | Symbols: APL2 | APL2 (ADPGLC-PPASE LARGE SUBUNIT); glucose-1-phosphate adenyltransferase | chr1:9631630-9634450 FORWARDhighly similar to ( 617) GLGL1\_BETVU Glucose-1-phosphate adenyltransferase large subunit, chloroplast precursor (EC 2.7.7.27) (ADP-glucose synthase) (ADP-glucose pyrophosphorylase) (AGPase S) (Alpha-D-glucose-1-phosphate adenyl transferase) - Beta vulgaris (Sugar beet)highly similar to ( 791) loc\_os07g13980 12007.m05843 protein glucose-1-phosphate adenyltransferase large subunit, chloroplast precursor, putative, expressed seq=cds; coord=7:23756173..23767134:-1; parent\_gene=GRMZM2G144002'

'highly similar to ( 845) AT5G48300 | Symbols: ADG1, APS1 | ADG1 (ADP GLUCOSE PYROPHOSPHORYLASE 1); glucose-1-phosphate adenyltransferase | chr5:19570326-19572557 FORWARDhighly similar to ( 914) GLGS\_HORVU Glucose-1-phosphate adenyltransferase small subunit, chloroplast precursor (EC 2.7.7.27) (ADP-glucose synthase) (ADP-glucose pyrophosphorylase) (AGPase B) (Alpha-D-glucose-1-phosphate adenyl transferase) Hordeum vulgare (Barley)highly similar to ( 905) loc\_os08g25734 12008.m06589 protein glucose-1-phosphate adenyltransferase small subunit, chloroplast precursor, putative, expressed seq=cds; coord=1:221648603..221653196:1; parent\_gene=GRMZM2G163437'

'moderately similar to ( 441) AT5G19220 | Symbols: ADG2, APL1 | APL1 (ADP GLUCOSE PYROPHOSPHORYLASE LARGE SUBUNIT 1); glucose-1-phosphate adenyltransferase | chr5:6463931-6466775 REVERSEmoderately similar to ( 445) GLGL1\_WHEAT Glucose-1-phosphate adenyltransferase large subunit (EC 2.7.7.27) (ADP-glucose synthase) (ADP-glucose pyrophosphorylase) (AGPase S) (Alpha-D-glucose-1-phosphate adenyl transferase) (Fragment) - Triticum aestivum (Wheat)moderately similar to ( 492) loc\_os03g52460 12003.m10222 protein glucose-1-phosphate adenyltransferase large subunit 3, chloroplast precursor, putative, expressed seq=cds; coord=1:273447466..273451914:-1; parent\_gene=GRMZM2G391936'

'highly similar to ( 570) AT1G27680 | Symbols: APL2 | APL2 (ADPGLC-PPASE LARGE SUBUNIT); glucose-1-phosphate adenylyltransferase | chr1:9631630-9634450 FORWARDnearly identical (1011) GLGL1\_MAIZE Glucose-1-phosphate adenylyltransferase large subunit 1, chloroplast precursor (EC 2.7.7.27) (ADP-glucose synthase) (ADP-glucose pyrophosphorylase) (AGPase S) (Alpha-D-glucose-1-phosphate adenylyl transferase) (Shrunken-2) - Zea mays (Ma)highly similar to ( 798) loc\_os01g44220 12001.m150665 protein glucose-1-phosphate adenylyltransferase large subunit 1, chloroplast precursor, putative, expressed seq=cds; coord=3:216414684..216424048:-1; parent\_gene=GRMZM2G429899'

'highly similar to ( 771) AT1G32900 | Symbols: | starch synthase, putative | chr1:11920582-11923506 REVERSEhighly similar to ( 966) SSG1B\_HORVU Granule-bound starch synthase 1b, chloroplast precursor (EC 2.4.1.242) (Granule-bound starch synthase 1b) (Fragment) - Hordeum vulgare (Barley)nearly identical (1030) loc\_os07g22930 12007.m29139 protein granule-bound starch synthase 1b, chloroplast precursor, putative, expressed seq=cds; coord=7:34872714..34879973:-1; parent\_gene=GRMZM2G008263'

'highly similar to ( 716) AT1G32900 | Symbols: | starch synthase, putative | chr1:11920582-11923506 REVERSEnearly identical (1076) SSG1\_MAIZE Granule-bound starch synthase 1, chloroplast precursor (EC 2.4.1.242) (Granule-bound starch synthase I) (GBSS-I) - Zea mays (Ma)highly similar to ( 933) loc\_os06g04200 12006.m31969 protein granule-bound starch synthase 1, chloroplast precursor, putative, expressed seq=cds; coord=9:23256308..23260236:-1; parent\_gene=GRMZM2G024993'

'highly similar to ( 990) AT4G18240 | Symbols: ATSS4, SSIV, SS4 | ATSS4; transferase, transferring glycosyl groups | chr4:10082221-10087044 FORWARDmoderately similar to ( 368) SSY3\_SOLTU Soluble starch synthase 3, chloroplast precursor (EC 2.4.1.21) (SS III) (Soluble starch synthase III) - Solanum tuberosum (Potato)nearly identical (1358) loc\_os05g45720 12005.m083787 protein glycogen synthase, putative, expressed seq=cds; coord=8:125308562..125317107:1; parent\_gene=GRMZM2G044744'

'highly similar to ( 821) AT3G01180 | Symbols: AtSS2 | AtSS2 (starch synthase 2); transferase, transferring glycosyl groups | chr3:62456-65678 REVERSEhighly similar to ( 962) SSY22\_ORYSA Soluble starch synthase 2-2, chloroplast precursor (EC 2.4.1.21) (Soluble starch synthase II-2) - Oryza sativa (Rice)highly similar to ( 962) loc\_os02g51070 12002.m10141 protein soluble starch synthase 2-2, chloroplast precursor, putative, expressed seq=cds; coord=5:206850855..206855627:-1; parent\_gene=GRMZM2G105791'

'nearly identical (1130) AT1G11720 | Symbols: ATSS3 | ATSS3 (starch synthase 3); starch synthase/ transferase, transferring glycosyl groups | chr1:3952511-3956840 FORWARDnearly identical (1201) SSY3\_SOLTU Soluble starch synthase 3, chloroplast precursor (EC 2.4.1.21) (SS III) (Soluble starch synthase III) - Solanum tuberosum (Potato)nearly identical (1712) loc\_os04g53310 12004.m10222 protein soluble starch synthase 3, chloroplast precursor, putative, expressed seq=cds; coord=10:142920487..142929525:1; parent\_gene=GRMZM2G121612'

'highly similar to ( 818) AT3G01180 | Symbols: AtSS2 | AtSS2 (starch synthase 2); transferase, transferring glycosyl groups | chr3:62456-65678 REVERSEnearly identical (1017) SSY21\_ORYSA Soluble starch synthase 2-1, chloroplast precursor (EC 2.4.1.21) (Soluble starch synthase II-1) - Oryza sativa (Rice)nearly identical (1017) loc\_os10g30156 12010.m05878 protein soluble starch synthase 2-1, chloroplast precursor, putative, expressed seq=cds; coord=5:33050572..33066028:-1; parent\_gene=GRMZM2G126988'

'very weakly similar to (82.0) AT5G24300 | Symbols: SSII, SSI, ATSS1 | SSII (SUPPRESSOR OF SALICYLIC ACID INSENSITIVITY 1); starch synthase/ transferase, transferring glycosyl groups | chr5:8266934-8270860 FORWARDweakly similar to ( 102) SSY1\_WHEAT Starch synthase 1, chloroplast precursor (EC 2.4.1.21) (SS I) (Starch synthase I-2) (SS I-2) - Triticum aestivum (Wheat)weakly similar to ( 104) loc\_os06g06560 12006.m05381 protein soluble starch synthase 1, chloroplast precursor, putative, expressed seq=cds; coord=9:17643701..17644469:1; parent\_gene=GRMZM2G129451'

'moderately similar to ( 400) AT5G65685 | Symbols: | soluble glycogen synthase-related | chr5:26273252-26275864 REVERSEweakly similar to ( 189) SSY3\_SOLTU Soluble starch synthase 3, chloroplast precursor (EC 2.4.1.21) (SS III) (Soluble starch synthase III) - Solanum tuberosum (Potato)highly similar to ( 907) loc\_os02g56320 12002.m10655 protein glycogen synthase 2, putative, expressed seq=cds; coord=4:172606253..172677186:-1; parent\_gene=GRMZM2G130043'

'nearly identical (1127) AT1G11720 | Symbols: ATSS3 | ATSS3 (starch synthase 3); starch synthase/ transferase, transferring glycosyl groups | chr1:3952511-3956840 FORWARDnearly identical (1156) SSY3\_SOLTU Soluble starch synthase 3, chloroplast precursor (EC 2.4.1.21) (SS III) (Soluble starch synthase III) - Solanum tuberosum (Potato)nearly identical (1490) loc\_os08g09230 12008.m05058 protein starch synthase III, putative, expressed seq=cds; coord=10:59506710..59518288:1; parent\_gene=GRMZM2G141399'

'highly similar to ( 571) AT3G01180 | Symbols: AtSS2 | AtSS2 (starch synthase 2); transferase, transferring glycosyl groups | chr3:62456-65678 REVERSEhighly similar to ( 692) SSY22\_ORYSA Soluble starch synthase 2-2, chloroplast precursor (EC 2.4.1.21) (Soluble starch synthase II-2) - Oryza sativa (Rice)highly similar to ( 692) loc\_os02g51070 12002.m10141 protein soluble starch synthase 2-2, chloroplast precursor, putative, expressed seq=cds; coord=6:113233723..113238779:1; parent\_gene=GRMZM2G348551'

'nearly identical (1184) AT3G20440 | Symbols: EMB2729, BE1 | alpha-amylase/ catalytic/ cation binding | chr3:7123603-7130364 REVERSEmoderately similar to ( 455) GLGB\_SOLTU 1,4-alpha-glucan branching enzyme (EC 2.4.1.18) (Starch branching enzyme) (Q-enzyme) - Solanum tuberosum (Potato)nearly identical (1504) loc\_os06g26234 12006.m32257 protein 1,4-alpha-glucan branching enzyme, putative, expressed seq=cds; coord=8:141990059..141994717:1; parent\_gene=GRMZM2G005298'

'nearly identical (1214) AT5G03650 | Symbols: SBE2.2 | SBE2.2 (starch branching enzyme 2.2); 1,4-alpha-glucan branching enzyme | chr5:931924-937470 FORWARDnearly identical (1638) GLGB\_MAIZE 1,4-alpha-glucan branching enzyme IIB, chloroplast precursor (EC 2.4.1.18) (Starch branching enzyme IIB) (Q-enzyme) - Zea mays (Maize)nearly identical (1366) loc\_os02g32660 12002.m33706 protein 1,4-alpha-glucan branching enzyme IIB, chloroplast precursor, putative, expressed seq=cds; coord=5:168451664..168468750:-1; parent\_gene=GRMZM2G032628'

'nearly identical (1269) AT5G03650 | Symbols: SBE2.2 | SBE2.2 (starch branching enzyme 2.2); 1,4-alpha-glucan branching enzyme | chr5:931924-937470 FORWARDnearly identical (1303) GLGB\_MAIZE 1,4-alpha-glucan branching enzyme IIB, chloroplast precursor (EC 2.4.1.18) (Starch branching enzyme IIB) (Q-enzyme) - Zea mays (Maize)nearly identical (1313) loc\_os02g32660 12002.m33706 protein 1,4-alpha-glucan branching enzyme IIB, chloroplast precursor, putative, expressed seq=cds; coord=2:58586007..58596234:1; parent\_gene=GRMZM2G073054'

'highly similar to ( 797) AT5G03650 | Symbols: SBE2.2 | SBE2.2 (starch branching enzyme 2.2); 1,4-alpha-glucan branching enzyme | chr5:931924-937470 FORWARDnearly identical (1352) GLGB\_ORYSA 1,4-alpha-glucan branching enzyme, chloroplast precursor (EC 2.4.1.18) (Starch branching enzyme) (Q-enzyme) - Oryza sativa (Rice)nearly identical (1352) loc\_os06g51084 12006.m091801 protein 1,4-alpha-glucan branching enzyme, chloroplast precursor, putative, expressed seq=cds; coord=5:63317874..63324803:-1; parent\_gene=GRMZM2G088753'

'highly similar to ( 671) AT1G03310 | Symbols: ATISA2, ISA2, DBE1, BE2 | isoamylase, putative / starch debranching enzyme, putative | chr1:813975-816623 FORWARDnearly identical (1034) loc\_os05g32710 12005.m07504 protein isoamylase-type starch debranching enzyme ISO2, putative, expressed seq=cds; coord=6:144564725..144567105:1; parent\_gene=GRMZM2G090905'

'nearly identical (1117) AT2G39930 | Symbols: ISA1, ATISA1 | ISA1 (ISOAMYLASE 1); alpha-amylase/ isoamylase | chr2:16666078-16672183 FORWARDnearly identical (1368) loc\_os08g40930 12008.m08072 protein isoamylase, putative, expressed seq=cds; coord=4:41369510..41378299:1; parent\_gene=GRMZM2G138060'

'nearly identical (1095) AT4G09020 | Symbols: ATISA3, ISA3 | ISA3 (ISOAMYLASE 3); alpha-amylase/ isoamylase | chr4:5784099-5788839 FORWARDhighly similar to ( 750) loc\_os09g29404 12009.m06091 protein glycogen operon protein glgX, putative, expressed seq=cds; coord=7:129101505..129113096:-1; parent\_gene=GRMZM2G150796'

'moderately similar to ( 462) AT4G10260 | Symbols: | pfkB-type carbohydrate kinase family protein | chr4:6371486-6372770 REVERSEhighly similar to ( 632) SCRK2\_MAIZE Fructokinase-2 (EC 2.7.1.4) (ZmFRK2) - Zea mays (Maize)highly similar to ( 582) loc\_os08g02120 12008.m04358 protein fructokinase-2, putative, expressed seq=cds; coord=6:3570233..3573134:1; parent\_gene=GRMZM2G051677'

'highly similar to ( 847) AT4G09510 | Symbols: CINV2 | beta-fructofuranosidase, putative / invertase, putative / saccharase, putative / beta-fructosidase, putative | chr4:6021679-6023310 REVERSEnearly identical (1081) loc\_os11g07440 12011.m28745 protein neutral/alkaline invertase, putative, expressed seq=cds; coord=4:204712664..204717434:-1; parent\_gene=GRMZM2G007277'

'highly similar to ( 830) AT1G56560 | Symbols: | beta-fructofuranosidase, putative / invertase, putative / saccharase, putative / beta-fructosidase, putative | chr1:21192593-21194948 FORWARDnearly identical (1028) loc\_os01g22900 12001.m42995 protein beta-fructofuranosidase, putative, expressed seq=cds; coord=8:39922110..39926350:1; parent\_gene=GRMZM2G022782'

'highly similar to ( 848) AT5G22510 | Symbols: | beta-fructofuranosidase, putative / invertase, putative / saccharase, putative / beta-fructosidase, putative | chr5:7474974-7477479 REVERSEnearly identical (1092) loc\_os02g32730 12002.m08366 protein alkaline/neutral invertase, putative, expressed seq=cds; coord=10:300426..310885:-1; parent\_gene=GRMZM2G040843'

'highly similar to ( 803) AT1G56560 | Symbols: | beta-fructofuranosidase, putative / invertase, putative / saccharase, putative / beta-fructosidase, putative | chr1:21192593-21194948 FORWARDnearly identical (1019) loc\_os01g22900 12001.m42995 protein beta-fructofuranosidase, putative, expressed seq=cds; coord=3:60778016..60781883:1; parent\_gene=GRMZM2G084694'

'highly similar to ( 691) AT1G56560 | Symbols: | beta-fructofuranosidase, putative / invertase, putative / saccharase, putative / beta-fructosidase, putative | chr1:21192593-21194948 FORWARDhighly similar to ( 795) loc\_os03g20020 12003.m07415 protein beta-fructofuranosidase, putative, expressed seq=cds; coord=1:51318993..51329214:-1; parent\_gene=GRMZM2G084940'

'highly similar to ( 848) AT4G09510 | Symbols: CIN2 | beta-fructofuranosidase, putative / invertase, putative / saccharase, putative / beta-fructosidase, putative | chr4:6021679-6023310 REVERSEnearly identical (1083) loc\_os11g07440 12011.m28745 protein neutral/alkaline invertase, putative, expressed seq=cds; coord=2:135722104..135725916:1; parent\_gene=GRMZM2G115451'

'highly similar to ( 925) AT4G09510 | Symbols: CIN2 | beta-fructofuranosidase, putative / invertase, putative / saccharase, putative / beta-fructosidase, putative | chr4:6021679-6023310 REVERSEnearly identical (1079) loc\_os02g34560 12002.m33716 protein neutral/alkaline invertase, putative, expressed seq=cds; coord=5:171276249..171280304:-1; parent\_gene=GRMZM2G118737'

'highly similar to ( 888) AT4G09510 | Symbols: CIN2 | beta-fructofuranosidase, putative / invertase, putative / saccharase, putative / beta-fructosidase, putative | chr4:6021679-6023310 REVERSEnearly identical (1004) loc\_os04g35280 12004.m35316 protein neutral/alkaline invertase, putative, expressed seq=cds; coord=4:163445823..163448826:1; parent\_gene=GRMZM2G136139'

'highly similar to ( 924) AT4G09510 | Symbols: CIN2 | beta-fructofuranosidase, putative / invertase, putative / saccharase, putative / beta-fructosidase, putative | chr4:6021679-6023310 REVERSEnearly identical (1079) loc\_os02g34560 12002.m33716 protein neutral/alkaline invertase, putative, expressed seq=cds; coord=4:114693388..114698517:-1; parent\_gene=GRMZM2G170842'

'highly similar to ( 540) AT1G55120 | Symbols: ATFRUCT5 | ATFRUCT5 (BETA-FRUCTOFURANOSIDASE 5); hydrolase, hydrolyzing O-glycosyl compounds / levanase | chr1:20566983-20569165 FORWARDhighly similar to ( 897) INV6\_ORYSA Beta-fructofuranosidase, insoluble isoenzyme 6 precursor (EC 3.2.1.26) (Sucrose hydrolase 6) (Invertase 6) (Cell wall beta-fructosidase 6) (OsCIN6) - Oryza sativa (Rice)highly similar to ( 897) loc\_os04g56920 12004.m10579 protein beta-fructofuranosidase, insoluble isoenzyme 6 precursor, putative, expressed seq=cds; coord=2:3229044..3231455:1; parent\_gene=GRMZM2G018692'

'moderately similar to ( 494) AT1G55120 | Symbols: ATFRUCT5 | ATFRUCT5 (BETA-FRUCTOFURANOSIDASE 5); hydrolase, hydrolyzing O-glycosyl compounds / levanase | chr1:20566983-20569165 FORWARDhighly similar to ( 704) INV7\_ORYSA Beta-fructofuranosidase, insoluble isoenzyme 7 precursor (EC 3.2.1.26) (Sucrose hydrolase 7) (Invertase 7) (Cell wall beta-fructosidase 7) (OsCIN7) - Oryza sativa (Rice)highly similar to ( 704) loc\_os09g08072 12009.m04076 protein beta-fructofuranosidase, insoluble isoenzyme 7 precursor, putative, expressed seq=cds; coord=2:3224667..3227301:1; parent\_gene=GRMZM2G018716'

'weakly similar to ( 119) loc\_os02g01590 12002.m100068 protein beta-fructofuranosidase 1 precursor, putative, expressed seq=cds; coord=5:67508656..67509581:1; parent\_gene=GRMZM2G089836'



'moderately similar to ( 442) AT3G52600 | Symbols: AtcwINV2 | AtcwINV2 (Arabidopsis thaliana cell wall invertase 2); hydrolase, hydrolyzing O-glycosyl compounds | chr3:19507080-19508833 REVERSEhighly similar to ( 702) INV2\_ORYSA Beta-fructofuranosidase, insoluble isoenzyme 2 precursor (EC 3.2.1.26) (Sucrose hydrolase 2) (Invertase 2) (Cell wall beta-fructosidase 2) (OsCIN2) - Oryza sativa (Rice)highly similar to ( 702) loc\_os04g33740 12004.m08469 protein beta-fructofuranosidase, insoluble isoenzyme 2 precursor, putative, expressed seq=cds; coord=10:114236242..114239362:-1; parent\_gene=GRMZM2G095725'

'highly similar to ( 601) AT3G52600 | Symbols: AtcwINV2 | AtcwINV2 (Arabidopsis thaliana cell wall invertase 2); hydrolase, hydrolyzing O-glycosyl compounds | chr3:19507080-19508833 REVERSEhighly similar to ( 908) INV2\_ORYSA Beta-fructofuranosidase, insoluble isoenzyme 2 precursor (EC 3.2.1.26) (Sucrose hydrolase 2) (Invertase 2) (Cell wall beta-fructosidase 2) (OsCIN2) - Oryza sativa (Rice)highly similar to ( 908) loc\_os04g33740 12004.m08469 protein beta-fructofuranosidase, insoluble isoenzyme 2 precursor, putative, expressed seq=cds; coord=2:56806976..56810257:1; parent\_gene=GRMZM2G119689'

'highly similar to ( 503) AT1G55120 | Symbols: ATFRUCT5 | ATFRUCT5 (BETA-FRUCTOFURANOSIDASE 5); hydrolase, hydrolyzing O-glycosyl compounds / levanase | chr1:20566983-20569165 FORWARDhighly similar to ( 833) INV7\_ORYSA Beta-fructofuranosidase, insoluble isoenzyme 7 precursor (EC 3.2.1.26) (Sucrose hydrolase 7) (Invertase 7) (Cell wall beta-fructosidase 7) (OsCIN7) - Oryza sativa (Rice)highly similar to ( 833) loc\_os09g08072 12009.m04076 protein beta-fructofuranosidase, insoluble isoenzyme 7 precursor, putative, expressed seq=cds; coord=2:3185602..3188957:1; parent\_gene=GRMZM2G119941'

'highly similar to ( 622) AT3G52600 | Symbols: AtcwINV2 | AtcwINV2 (Arabidopsis thaliana cell wall invertase 2); hydrolase, hydrolyzing O-glycosyl compounds | chr3:19507080-19508833 REVERSEhighly similar to ( 960) INV3\_ORYSA Beta-fructofuranosidase, insoluble isoenzyme 3 precursor (EC 3.2.1.26) (Sucrose hydrolase 3) (Invertase 3) (Cell wall beta-fructosidase 3) (OsCIN3) - Oryza sativa (Rice)highly similar to ( 960) loc\_os04g33720 12004.m08467 protein beta-fructofuranosidase, insoluble isoenzyme 3 precursor, putative, expressed seq=cds; coord=10:114288173..114290565:1; parent\_gene=GRMZM2G123633'

'highly similar to ( 642) AT3G52600 | Symbols: AtcwINV2 | AtcwINV2 (Arabidopsis thaliana cell wall invertase 2); hydrolase, hydrolyzing O-glycosyl compounds | chr3:19507080-19508833 REVERSEnearly identical (1174) INVA\_MAIZE Beta-fructofuranosidase, cell wall isozyme precursor (EC 3.2.1.26) (Sucrose hydrolase) (Invertase) - Zea mays (Maize)highly similar to ( 927) loc\_os02g33110 12002.m100224 protein beta-fructofuranosidase, insoluble isoenzyme 1 precursor, putative, expressed seq=cds; coord=5:169454598..169459090:1; parent\_gene=GRMZM2G139300'

'highly similar to ( 642) AT3G52600 | Symbols: AtcwINV2 | AtcwINV2 (Arabidopsis thaliana cell wall invertase 2); hydrolase, hydrolyzing O-glycosyl compounds | chr3:19507080-19508833 REVERSEnearly identical (1174) INVA\_MAIZE Beta-fructofuranosidase, cell wall isozyme precursor (EC 3.2.1.26) (Sucrose hydrolase) (Invertase) - Zea mays (Maize)highly similar to ( 927) loc\_os02g33110 12002.m100224 protein beta-fructofuranosidase, insoluble isoenzyme 1 precursor, putative, expressed seq=cds; coord=5:169454598..169459090:1; parent\_gene=GRMZM2G139300'

'highly similar to ( 552) AT1G55120 | Symbols: ATFRUCT5 | ATFRUCT5 (BETA-FRUCTOFURANOSIDASE 5); hydrolase, hydrolyzing O-glycosyl compounds / levanase | chr1:20566983-20569165 FORWARDhighly similar to ( 958) INV4\_ORYSA Beta-fructofuranosidase, insoluble isoenzyme 4 precursor (EC 3.2.1.26) (Sucrose hydrolase 4) (Invertase 4) (Cell wall beta-fructosidase 4) (OsCIN4) - Oryza sativa (Rice)highly similar to ( 958) loc\_os01g73580 12001.m13385 protein beta-fructofuranosidase, insoluble isoenzyme 4 precursor, putative, expressed seq=cds; coord=3:145729813..145733247:-1; parent\_gene=GRMZM2G174249'

'highly similar to ( 716) AT1G62660 | Symbols: | beta-fructosidase (BFRUCT3) / beta-fructofuranosidase / invertase, vacuolar | chr1:23199949-23203515 FORWARDnearly identical (1191) INV1\_MAIZE Beta-fructofuranosidase 1 precursor (EC 3.2.1.26) (Sucrose 1) (Invertase 1) - Zea mays (Maize)highly similar to ( 956) loc\_os04g45290 12004.m35180 protein beta-fructofuranosidase 1 precursor, putative, expressed seq=cds; coord=2:22880766..22885337:-1; parent\_gene=GRMZM2G394450'

'highly similar to ( 507) AT1G12240 | Symbols: ATBETAFRUCT4, VAC-INV | ATBETAFRUCT4; beta-fructofuranosidase/ hydrolase, hydrolyzing O-glycosyl compounds | chr1:4153699-4157457 FORWARDhighly similar to ( 569) INV1\_MAIZE Beta-fructofuranosidase 1 precursor (EC 3.2.1.26) (Sucrose 1) (Invertase 1) - Zea mays (Maize)highly similar to ( 739) loc\_os02g01590 12002.m100068 protein beta-fructofuranosidase 1 precursor, putative, expressed seq=cds; coord=4:240446489..240449003:-1; parent\_gene=GRMZM2G463871'

'moderately similar to ( 427) AT1G50460 | Symbols: HKL1 | HKL1 (HEXOKINASE-LIKE 1); ATP binding / fructokinase/ glucokinase/ hexokinase | chr1:18694031-18697429 FORWARDhighly similar to ( 649) HXK10\_ORYSA Hexokinase-10 (EC 2.7.1.1) (Hexokinase-7) - Oryza sativa (Rice)highly similar to ( 649) loc\_os05g31110 12005.m07345 protein hexokinase-1, putative, expressed seq=cds; coord=6:135959554..135964731:1; parent\_gene=GRMZM2G046686'

'moderately similar to ( 481) AT2G19860 | Symbols: ATHXK2, HXK2 | HXK2 (HEXOKINASE 2); ATP binding / fructokinase/ glucokinase/ hexokinase | chr2:8571949-8573762 FORWARDhighly similar to ( 627) HXK7\_ORYSA Hexokinase-7 (EC 2.7.1.1) (Hexokinase-6) - Oryza sativa (Rice)highly similar to ( 627) loc\_os05g09500 12005.m27732 protein hexokinase-1, putative, expressed seq=cds; coord=6:129979107..129982019:1; parent\_gene=GRMZM2G051806'

'highly similar to ( 589) AT4G29130 | Symbols: ATHXK1, GIN2, HXK1 | HXK1 (HEXOKINASE 1); ATP binding / fructokinase/ glucokinase/ hexokinase | chr4:14352338-14354865 REVERSEhighly similar to ( 761) HXK5\_ORYSA Hexokinase-5 (EC 2.7.1.1) (Hexokinase I) - Oryza sativa (Rice)highly similar to ( 761) loc\_os05g44760 12005.m08601 protein hexokinase-2, putative, expressed seq=cds; coord=8:124652438..124657923:1; parent\_gene=GRMZM2G058745'

'highly similar to ( 535) AT1G50460 | Symbols: HKL1 | HKL1 (HEXOKINASE-LIKE 1); ATP binding / fructokinase/ glucokinase/ hexokinase | chr1:18694031-18697429 FORWARDhighly similar to ( 735) HXK3\_ORYSA Hexokinase-3 (EC 2.7.1.1) (Hexokinase-8) - Oryza sativa (Rice)highly similar to ( 735) loc\_os01g71320 12001.m13175 protein hexokinase-1, putative, expressed seq=cds; coord=3:152175317..152181802:1; parent\_gene=GRMZM2G068913'

'highly similar to ( 506) AT4G29130 | Symbols: ATHXK1, GIN2, HXK1 | HXK1 (HEXOKINASE 1); ATP binding / fructokinase/ glucokinase/ hexokinase | chr4:14352338-14354865 REVERSEhighly similar to ( 672) HXK8\_ORYSA Hexokinase-8 (EC 2.7.1.1) (Hexokinase-4) - Oryza sativa (Rice)highly similar to ( 672) loc\_os01g09460 12001.m07571 protein hexokinase-1, putative, expressed seq=cds; coord=3:7078308..7082094:1; parent\_gene=GRMZM2G104081'

'highly similar to ( 582) AT4G29130 | Symbols: ATHXK1, GIN2, HXK1 | HXK1 (HEXOKINASE 1); ATP binding / fructokinase/ glucokinase/ hexokinase | chr4:14352338-14354865 REVERSEhighly similar to ( 657) HXK9\_ORYSA Hexokinase-9 (EC 2.7.1.1) (Hexokinase-5) - Oryza sativa (Rice)highly similar to ( 657) loc\_os01g52450 12001.m11419 protein hexokinase-2, putative, expressed seq=cds; coord=3:201789514..201799556:-1; parent\_gene=GRMZM2G171373'

'highly similar to ( 613) AT4G29130 | Symbols: ATHXK1, GIN2, HXK1 | HXK1 (HEXOKINASE 1); ATP binding / fructokinase/ glucokinase/ hexokinase | chr4:14352338-14354865 REVERSEhighly similar to ( 799) HXK5\_ORYSA Hexokinase-5 (EC 2.7.1.1) (Hexokinase I) - Oryza sativa (Rice)highly similar to ( 799) loc\_os05g44760 12005.m08601 protein hexokinase-2, putative, expressed seq=cds; coord=6:160237817..160245075:-1; parent\_gene=GRMZM2G432801'

'highly similar to ( 535) AT1G50460 | Symbols: HKL1 | HKL1 (HEXOKINASE-LIKE 1); ATP binding / fructokinase/ glucokinase/ hexokinase | chr1:18694031-18697429 FORWARDhighly similar to ( 753) HXK3\_ORYSA Hexokinase-3 (EC 2.7.1.1) (Hexokinase-8) - Oryza sativa (Rice)highly similar to ( 753) loc\_os01g71320 12001.m13175 protein hexokinase-1, putative, expressed seq=cds; coord=8:159186574..159193136:1; parent\_gene=GRMZM2G467069'

'nearly identical (1001) AT1G73370 | Symbols: SUS6, ATSUS6 | SUS6 (SUCROSE SYNTHASE 6); UDP-glycosyltransferase/ sucrose synthase | chr1:27584533-27588326 REVERSEhighly similar to ( 816) SUS2\_PEA Sucrose synthase 2 (EC 2.4.1.13) (Sucrose-UDP glucosyltransferase 2) - Pisum sativum (Garden pea)nearly identical (1244) loc\_os02g58480 12002.m10869 protein sucrose synthase 2, putative, expressed seq=cds; coord=4:168743488..168746616:-1; parent\_gene=GRMZM2G045171'

'nearly identical (1146) AT1G73370 | Symbols: SUS6, ATSUS6 | SUS6 (SUCROSE SYNTHASE 6); UDP-glycosyltransferase/ sucrose synthase | chr1:27584533-27588326 REVERSEhighly similar to ( 934) SUS2\_PEA Sucrose synthase 2 (EC 2.4.1.13) (Sucrose-UDP glucosyltransferase 2) - Pisum sativum (Garden pea)nearly identical (1536) loc\_os04g24430 12004.m07574 protein sucrose synthase 2, putative, expressed seq=cds; coord=5:64769600..64773966:-1; parent\_gene=GRMZM2G060659'

'nearly identical (1215) AT3G43190 | Symbols: SUS4, ATSUS4 | SUS4; UDP-glycosyltransferase/ sucrose synthase/ transferase, transferring glycosyl groups | chr3:15179204-15182577 REVERSEnearly identical (1559) SUS1\_MAIZE Sucrose synthase 1 (EC 2.4.1.13) (Sucrose-UDP glucosyltransferase 1) (Shrunken-1) - Zea mays (Maize)nearly identical (1492) loc\_os06g09450 12006.m091637 protein sucrose synthase 1, putative, expressed seq=cds; coord=9:11496011..11502772:1; parent\_gene=GRMZM2G089713'

'nearly identical (1233) AT3G43190 | Symbols: SUS4, ATSUS4 | SUS4; UDP-glycosyltransferase/ sucrose synthase/ transferase, transferring glycosyl groups | chr3:15179204-15182577 REVERSEnearly identical (1661) SUS2\_MAIZE Sucrose synthase 2 (EC 2.4.1.13) (Sucrose-UDP glucosyltransferase 2) - Zea mays (Maize)nearly identical (1587) loc\_os03g28330 12003.m34880 protein sucrose synthase 2, putative, expressed seq=cds; coord=9:122220190..122226863:-1; parent\_gene=GRMZM2G152908'

'highly similar to ( 677) AT4G02280 | Symbols: SUS3, ATSUS3 | SUS3 (sucrose synthase 3); UDP-glycosyltransferase/ sucrose synthase/ transferase, transferring glycosyl groups | chr4:995166-998719 FORWARDhighly similar to ( 669) SUS2\_PEA Sucrose synthase 2 (EC 2.4.1.13) (Sucrose-UDP glucosyltransferase 2) - Pisum sativum (Garden pea)highly similar to ( 741) loc\_os03g22120 12003.m34861 protein sucrose synthase 2, putative, expressed seq=cds; coord=1:56756360..56761192:-1; parent\_gene=GRMZM2G311182'

'highly similar to ( 733) AT4G02280 | Symbols: SUS3, ATSUS3 | SUS3 (sucrose synthase 3); UDP-glycosyltransferase/ sucrose synthase/ transferase, transferring glycosyl groups | chr4:995166-998719 FORWARDhighly similar to ( 726) SUS2\_PEA Sucrose synthase 2 (EC 2.4.1.13) (Sucrose-UDP glucosyltransferase 2) - Pisum sativum (Garden pea)highly similar to ( 809) loc\_os03g22120 12003.m34861 protein sucrose synthase 2, putative, expressed seq=cds; coord=1:56785051..56787917:-1; parent\_gene=GRMZM2G318780'

'highly similar to ( 694) AT4G17090 | Symbols: CT-BMY, BAM3, BMY8 | CT-BMY (CHLOROPLAST BETA-AMYLASE); beta-amylase | chr4:9605266-9607250 REVERSEmoderately similar to ( 473) AMYB\_MEDSA Beta-amylase (EC 3.2.1.2) (1,4-alpha-D-glucan maltohydrolase) - Medicago sativa (Alfalfa)highly similar to ( 814) loc\_os10g41550 12010.m06918 protein beta-amylase, putative, expressed seq=cds; coord=1:95188932..95192571:-1; parent\_gene=GRMZM2G007939'

'highly similar to ( 650) AT3G23920 | Symbols: BAM1, BMY7, TR-BAMY | BAM1 (BETA-AMYLASE 1); beta-amylase | chr3:8641722-8644199 FORWARDmoderately similar to ( 421) AMYB\_HORVU Beta-amylase (EC 3.2.1.2) (1,4-alpha-D-glucan maltohydrolase) - Hordeum vulgare (Barley)highly similar to ( 826) loc\_os10g32810 12010.m06117 protein beta-amylase, putative, expressed seq=cds; coord=5:30775043..30777461:-1; parent\_gene=GRMZM2G025833'

'weakly similar to ( 101) AT5G18670 | Symbols: BMY3, BAM9 | BMY3; beta-amylase/ catalytic/ cation binding | chr5:6226138-6227999 FORWARDweakly similar to ( 169) loc\_os03g22790 12003.m07677 protein beta-amylase, putative, expressed seq=cds; coord=10:117709760..117710623:-1; parent\_gene=GRMZM2G033339'

'nearly identical (1223) AT5G63840 | Symbols: RSW3 | RSW3 (RADIAL SWELLING 3); glucosidase/ hydrolase, hydrolyzing O-glycosyl compounds | chr5:25545056-25548922 FORWARDmoderately similar to ( 341) AGLU\_BETVU Alpha-glucosidase precursor (EC 3.2.1.20) (Maltase) - Beta vulgaris (Sugar beet)nearly identical (1631) loc\_os03g11720 12003.m06624 protein neutral alpha-glucosidase AB precursor, putative, expressed seq=cds; coord=9:146533570..146540061:-1; parent\_gene=GRMZM2G034575'

'highly similar to ( 692) AT4G17090 | Symbols: CT-BMY, BAM3, BMY8 | CT-BMY (CHLOROPLAST BETA-AMYLASE); beta-amylase | chr4:9605266-9607250 REVERSEmoderately similar to ( 467) AMYB\_MEDSA Beta-amylase (EC 3.2.1.2) (1,4-alpha-D-glucan maltohydrolase) - Medicago sativa (Alfalfa)highly similar to ( 785) loc\_os10g41550 12010.m06918 protein beta-amylase, putative, expressed seq=cds; coord=9:114176716..114179596:1; parent\_gene=GRMZM2G035749'

'highly similar to ( 655) AT4G15210 | Symbols: ATBETA-AMY, AT-BETA-AMY, RAM1 | BAM5 (BETA-AMYLASE 5); beta-amylase | chr4:8666852-8669357 REVERSEnearly identical (1011) AMYB\_MAIZE Beta-amylase (EC 3.2.1.2) (1,4-alpha-D-glucan maltohydrolase) - Zea mays (Maize)highly similar to ( 894) loc\_os07g35940 12007.m07847 protein beta-amylase, putative seq=cds; coord=7:155357370..155360570:1; parent\_gene=GRMZM2G058310'

'moderately similar to ( 463) AT4G25000 | Symbols: ATAMY1, AMY1 | AMY1 (ALPHA-AMYLASE-LIKE); alpha-amylase | chr4:12852109-12853825 REVERSEhighly similar to ( 748) AMY3D\_ORYSA Alpha-amylase isozyme 3D precursor (EC 3.2.1.1) (1,4-alpha-D-glucan glucanohydrolase) - Oryza sativa (Rice)highly similar to ( 748) loc\_os08g36910 12008.m26515 protein alpha-amylase isozyme 3D precursor, putative, expressed seq=cds; coord=1:199630232..199632219:1; parent\_gene=GRMZM2G070172'

'highly similar to ( 509) AT4G25000 | Symbols: ATAMY1, AMY1 | AMY1 (ALPHA-AMYLASE-LIKE); alpha-amylase | chr4:12852109-12853825 REVERSEhighly similar to ( 756) AMY1\_HORVU Alpha-amylase type A isozyme precursor (EC 3.2.1.1) (1,4-alpha-D-glucan glucanohydrolase) (AMY1) (Low pI alpha-amylase) - Hordeum vulgare (Barley)highly similar to ( 743) loc\_os06g49970 12006.m31931 protein alpha-amylase isozyme C2 precursor, putative, expressed seq=cds; coord=7:105219462..105221560:-1; parent\_gene=GRMZM2G074781'

'moderately similar to ( 407) AT4G17090 | Symbols: CT-BMY, BAM3, BMY8 | CT-BMY (CHLOROPLAST BETA-AMYLASE); beta-amylase | chr4:9605266-9607250 REVERSEmoderately similar to ( 302) AMYB\_VIGUN Beta-amylase (EC 3.2.1.2) (1,4-alpha-D-glucan maltohydrolase) - Vigna unguiculata (Cowpea)highly similar to ( 778) loc\_os01g13550 12001.m07964 protein beta-amylase, putative, expressed seq=cds; coord=8:29211106..29216116:-1; parent\_gene=GRMZM2G077202'

'moderately similar to ( 237) AT4G25000 | Symbols: ATAMY1, AMY1 | AMY1 (ALPHA-AMYLASE-LIKE); alpha-amylase | chr4:12852109-12853825 REVERSEmoderately similar to ( 360) AMY1\_HORVU Alpha-amylase type A isozyme precursor (EC 3.2.1.1) (1,4-alpha-D-glucan glucanohydrolase) (AMY1) (Low pI alpha-amylase) - Hordeum vulgare (Barley)moderately similar to ( 355) loc\_os06g49970 12006.m31931 protein alpha-amylase isozyme C2 precursor, putative, expressed seq=cds; coord=7:105210274..105211672:1; parent\_gene=GRMZM2G081502'

'moderately similar to ( 330) AT5G18670 | Symbols: BMY3, BAM9 | BMY3; beta-amylase/ catalytic/ cation binding | chr5:6226138-6227999 FORWARDweakly similar to ( 182) AMYB\_MAIZE Beta-amylase (EC 3.2.1.2) (1,4-alpha-D-glucan maltohydrolase) - Zea mays (Maize)highly similar to ( 600) loc\_os03g22790 12003.m07677 protein beta-amylase, putative, expressed seq=cds; coord=1:60087923..60089930:1; parent\_gene=GRMZM2G082034'

'highly similar to ( 513) AT4G25000 | Symbols: ATAMY1, AMY1 | AMY1 (ALPHA-AMYLASE-LIKE); alpha-amylase | chr4:12852109-12853825 REVERSEhighly similar to ( 747) AMY1\_ORYSA Alpha-amylase precursor (EC 3.2.1.1) (1,4-alpha-D-glucan glucanohydrolase) (Isozyme 1B) - Oryza sativa (Rice)highly similar to ( 748) loc\_os02g52700 12002.m10300 protein alpha-amylase precursor, putative, expressed seq=cds; coord=5:209898977..209901053:-1; parent\_gene=GRMZM2G103055'

'highly similar to ( 509) AT4G25000 | Symbols: ATAMY1, AMY1 | AMY1 (ALPHA-AMYLASE-LIKE); alpha-amylase | chr4:12852109-12853825 REVERSEhighly similar to ( 808) AMY3B\_ORYSA Alpha-amylase isozyme 3B precursor (EC 3.2.1.1) (1,4-alpha-D-glucan glucanohydrolase) - Oryza sativa (Rice)highly similar to ( 808) loc\_os09g28420 12009.m05993 protein alpha-amylase isozyme 3B precursor, putative, expressed seq=cds; coord=2:186265525..186267387:1; parent\_gene=GRMZM2G138468'

'nearly identical (1237) AT5G63840 | Symbols: RSW3 | RSW3 (RADIAL SWELLING 3); glucosidase/ hydrolase, hydrolyzing O-glycosyl compounds | chr5:25545056-25548922 FORWARDmoderately similar to ( 336) AGLU\_ORYSA Probable alpha-glucosidase Os06g0675700 precursor (EC 3.2.1.20) (Maltase) - Oryza sativa (Rice)nearly identical (1646) loc\_os03g11720 12003.m06624 protein neutral alpha-glucosidase AB precursor, putative, expressed seq=cds; coord=1:27094498..27098727:1; parent\_gene=GRMZM2G163129'

'moderately similar to ( 410) AT3G23920 | Symbols: BAM1, BMY7, TR-BAMY | BAM1 (BETA-AMYLASE 1); beta-amylase | chr3:8641722-8644199 FORWARDmoderately similar to ( 305) AMYB\_VIGUN Beta-amylase (EC 3.2.1.2) (1,4-alpha-D-glucan maltohydrolase) - Vigna unguiculata (Cowpea)highly similar to ( 770) loc\_os01g13550 12001.m07964 protein beta-amylase, putative, expressed seq=cds; coord=3:1536020..1540295:1; parent\_gene=GRMZM2G175218'

'moderately similar to ( 377) AT5G18670 | Symbols: BMY3, BAM9 | BMY3; beta-amylase/ catalytic/ cation binding | chr5:6226138-6227999 FORWARDmoderately similar to ( 257) AMYB\_WHEAT Beta-amylase (EC 3.2.1.2) (1,4-alpha-D-glucan maltohydrolase) - Triticum aestivum (Wheat)highly similar to ( 728) loc\_os07g47120 12007.m08929 protein beta-amylase, putative, expressed seq=cds; coord=7:171860442..171862785:-1; parent\_gene=GRMZM2G181284'

'highly similar to ( 629) AT1G76130 | Symbols: ATAMY2, AMY2 | AMY2 (ALPHA-AMYLASE-LIKE 2); alpha-amylase/ calcium ion binding / catalytic/ cation binding | chr1:28561647-28563914 FORWARDmoderately similar to ( 392) AMY2\_HORVU Alpha-amylase type B isozyme precursor (EC 3.2.1.1) (1,4-alpha-D-glucan glucanohydrolase) (AMY2-2) (High pI alpha-amylase) - Hordeum vulgare (Barley)highly similar to ( 793) loc\_os04g33040 12004.m08400 protein alpha-amylase type B isozyme precursor, putative, expressed seq=cds; coord=2:60765875..60770124:-1; parent\_gene=GRMZM2G422938'

'highly similar to ( 678) AT3G23920 | Symbols: BAM1, BMY7, TR-BAMY | BAM1 (BETA-AMYLASE 1); beta-amylase | chr3:8641722-8644199 FORWARDmoderately similar to ( 434) AMYB\_SOYBN Beta-amylase (EC 3.2.1.2) (1,4-alpha-D-glucan maltohydrolase) - Glycine max (Soybean)highly similar to ( 850) loc\_os03g04770 12003.m06004 protein beta-amylase, putative, expressed seq=cds; coord=1:9057041..9060022:1; parent\_gene=GRMZM2G450125'

'weakly similar to ( 117) AT5G18670 | Symbols: BMY3, BAM9 | BMY3; beta-amylase/ catalytic/ cation binding | chr5:6226138-6227999 FORWARDweakly similar to ( 186) loc\_os03g22790 12003.m07677 protein beta-amylase, putative, expressed seq=cds; coord=2:19253013..19255143:-1; parent\_gene=GRMZM2G462258'

'highly similar to ( 664) AT5G45300 | Symbols: BMY2, BAM8 | BMY2 (BETA-AMYLASE 2); beta-amylase/ catalytic/ cation binding | chr5:18353636-18356696 FORWARDmoderately similar to ( 368) AMYB\_SOYBN Beta-amylase (EC 3.2.1.2) (1,4-alpha-D-glucan maltohydrolase) - Glycine max (Soybean)highly similar to ( 956) loc\_os02g03690 12002.m05719 protein beta-amylase, putative, expressed seq=cds; coord=4:239081202..239093194:1; parent\_gene=GRMZM2G069486'

'highly similar to ( 726) AT4G00490 | Symbols: BAM2, BMY9 | BAM2 (BETA-AMYLASE 2); beta-amylase | chr4:222422-224862 FORWARDmoderately similar to ( 461) AMYB\_SOYBN Beta-amylase (EC 3.2.1.2) (1,4-alpha-D-glucan maltohydrolase) - Glycine max (Soybean)highly similar to ( 879) loc\_os09g39570 12009.m06895 protein beta-amylase, putative, expressed seq=cds; coord=7:62301852..62305837:1; parent\_gene=GRMZM2G446515'

'nearly identical (1326) AT3G29320 | Symbols: | glucan phosphorylase, putative | chr3:11252871-11257587 FORWARDnearly identical (1356) PHSL\_IPOBA Alpha-1,4 glucan phosphorylase L isozyme, chloroplast precursor (EC 2.4.1.1) (Starch phosphorylase L) - Ipomoea batatas (Sweet potato) (Batate)nearly identical (1427) loc\_os03g55090 12003.m10424 protein alpha-1,4 glucan phosphorylase, L isozyme, chloroplast precursor, putative, expressed seq=cds; coord=1:278183921..278192926:-1; parent\_gene=GRMZM2G074158'

'nearly identical (1329) AT3G46970 | Symbols: ATPHS2, PHS2 | PHS2 (ALPHA-GLUCAN PHOSPHORYLASE 2); phosphorylase/ transferase, transferring glycosyl groups | chr3:17301625-17306111 REVERSEnearly identical (1491) PSH\_WHEAT Alpha-glucan phosphorylase, H isozyme (EC 2.4.1.1) (Starch phosphorylase H) - Triticum aestivum (Wheat)nearly identical (1523) loc\_os01g63270 12001.m43279 protein alpha-glucan phosphorylase, H isozyme, putative, expressed seq=cds; coord=3:178982016..178990918:1; parent\_gene=GRMZM2G085577'

'highly similar to ( 743) AT5G64860 | Symbols: DPE1 | DPE1 (DISPROPORTIONATING ENZYME); 4-alpha-glucanotransferase/ catalytic/ cation binding | chr5:25925373-25928788 REVERSEhighly similar to ( 743) DPEP\_SOLTU 4-alpha-glucanotransferase, chloroplast precursor (EC 2.4.1.25) (Amylomaltase) (Disproportionating enzyme) (D-enzyme) - Solanum tuberosum (Potato)highly similar to ( 944) loc\_os07g43390 12007.m08567 protein 4-alpha-glucanotransferase, chloroplast precursor, putative, expressed seq=cds; coord=7:167230471..167241954:1; parent\_gene=GRMZM2G013811'

'highly similar to ( 576) AT2G36460 | Symbols: | fructose-bisphosphate aldolase, putative | chr2:15296929-15297732 REVERSEhighly similar to ( 708) ALF\_MAIZE Fructose-bisphosphate aldolase, cytoplasmic isozyme (EC 4.1.2.13) - Zea mays (Maize)highly similar to ( 669) loc\_os05g33380 12005.m07570 protein fructose-bisphosphate aldolase cytoplasmic isozyme, putative, expressed seq=cds; coord=3:165722970..165725581:1; parent\_gene=GRMZM2G057823'

'highly similar to ( 574) AT2G36460 | Symbols: | fructose-bisphosphate aldolase, putative | chr2:15296929-15297732 REVERSEhighly similar to ( 700) ALF\_MAIZE Fructose-bisphosphate aldolase, cytoplasmic isozyme (EC 4.1.2.13) - Zea mays (Maize)highly similar to ( 667) loc\_os05g33380 12005.m07570 protein fructose-bisphosphate aldolase cytoplasmic isozyme, putative, expressed seq=cds; coord=8:163307256..163309969:-1; parent\_gene=GRMZM2G066024'

'highly similar to ( 955) AT3G08590 | Symbols: | 2,3-bisphosphoglycerate-independent phosphoglycerate mutase, putative / phosphoglyceromutase, putative | chr3:2608683-2611237 REVERSEnearly identical (1085) PMGI\_MAIZE 2,3-bisphosphoglycerate-independent phosphoglycerate mutase (EC 5.4.2.1) (Phosphoglyceromutase) (BPG-independent PGAM) (PGAM-I) - Zea mays (Maize)nearly identical (1033) loc\_os01g60190 12001.m42741 protein 2,3-bisphosphoglycerate-independent phosphoglycerate mutase, putative, expressed seq=cds; coord=3:185834707..185839417:-1; parent\_gene=GRMZM2G003385'

'highly similar to ( 574) AT1G09780 | Symbols: | 2,3-biphosphoglycerate-independent phosphoglycerate mutase, putative / phosphoglyceromutase, putative | chr1:3165550-3167812 REVERSEhighly similar to ( 598) PMGI\_RICCO 2,3-biphosphoglycerate-independent phosphoglycerate mutase (EC 5.4.2.1) (Phosphoglyceromutase) (BPG-independent PGAM) (PGAM-I) - Ricinus communis (Castor bean)highly similar to ( 645) loc\_os03g21260 12003.m07532 protein 2,3-biphosphoglycerate-independent phosphoglycerate mutase, putative seq=cds; coord=1:54533483..54536342:1; parent\_gene=GRMZM2G050077'

'highly similar to ( 716) AT3G30841 | Symbols: | 2,3-biphosphoglycerate-independent phosphoglycerate mutase-related / phosphoglyceromutase-related | chr3:12591595-12593401 FORWARDhighly similar to ( 782) loc\_os12g35040 12012.m07297 protein 2,3-biphosphoglycerate-independent phosphoglycerate mutase, putative, expressed seq=cds; coord=10:25554428..25557522:-1; parent\_gene=GRMZM2G054250'

'moderately similar to ( 300) AT3G08590 | Symbols: | 2,3-biphosphoglycerate-independent phosphoglycerate mutase, putative / phosphoglyceromutase, putative | chr3:2608683-2611237 REVERSEmoderately similar to ( 343) PMGI\_MAIZE 2,3-biphosphoglycerate-independent phosphoglycerate mutase (EC 5.4.2.1) (Phosphoglyceromutase) (BPG-independent PGAM) (PGAM-I) - Zea mays (Maize)moderately similar to ( 312) loc\_os01g60190 12001.m42741 protein 2,3-biphosphoglycerate-independent phosphoglycerate mutase, putative, expressed seq=cds; coord=6:123671813..123676490:1; parent\_gene=GRMZM2G146778'

'moderately similar to ( 412) AT3G08590 | Symbols: | 2,3-biphosphoglycerate-independent phosphoglycerate mutase, putative / phosphoglyceromutase, putative | chr3:2608683-2611237 REVERSEmoderately similar to ( 464) PMGI\_MAIZE 2,3-biphosphoglycerate-independent phosphoglycerate mutase (EC 5.4.2.1) (Phosphoglyceromutase) (BPG-independent PGAM) (PGAM-I) - Zea mays (Maize)moderately similar to ( 430) loc\_os01g60190 12001.m42741 protein 2,3-biphosphoglycerate-independent phosphoglycerate mutase, putative, expressed seq=cds; coord=3:15212255..15222203:-1; parent\_gene=GRMZM2G334628'

'highly similar to ( 785) AT2G36530 | Symbols: LOS2 | LOS2; copper ion binding / phosphopyruvate hydratase | chr2:15321081-15323786 REVERSEhighly similar to ( 879) ENO2\_MAIZE Enolase 2 (EC 4.2.1.11) (2-phosphoglycerate dehydratase 2) (2-phospho-D-glycerate hydro-lyase 2) - Zea mays (Maize)highly similar to ( 850) loc\_os10g08550 12010.m065231 protein enolase, putative, expressed seq=cds; coord=1:125074232..125080812:-1; parent\_gene=GRMZM2G048371'

'highly similar to ( 765) AT2G36530 | Symbols: LOS2 | LOS2; copper ion binding / phosphopyruvate hydratase | chr2:15321081-15323786 REVERSEhighly similar to ( 882) ENO1\_MAIZE Enolase 1 (EC 4.2.1.11) (2-phosphoglycerate dehydratase 1) (2-phospho-D-glycerate hydro-lyase 1) - Zea mays (Maize)highly similar to ( 846) loc\_os06g04510 12006.m05181 protein enolase 1, putative, expressed seq=cds; coord=9:22100864..22105552:1; parent\_gene=GRMZM2G064302'

'highly similar to ( 607) AT2G29560 | Symbols: | enolase, putative | chr2:12646635-12649694 FORWARDmoderately similar to ( 447) ENO\_CHLRE Enolase (EC 4.2.1.11) (2-phosphoglycerate dehydratase) (2-phospho-D-glycerate hydro-lyase) (Fragment) - Chlamydomonas reinhardtiihighly similar to ( 806) loc\_os03g15950 12003.m07032 protein enolase, putative, expressed seq=cds; coord=9:140431817..140437712:1; parent\_gene=GRMZM2G131539'

'highly similar to ( 612) AT2G36530 | Symbols: LOS2 | LOS2; copper ion binding / phosphopyruvate hydratase | chr2:15321081-15323786 REVERSEhighly similar to ( 660) ENO1\_MAIZE Enolase 1 (EC 4.2.1.11) (2-phosphoglycerate dehydratase 1) (2-phospho-D-glycerate hydro-lyase 1) - Zea mays (Maize)highly similar to ( 655) loc\_os06g04510 12006.m05181 protein enolase 1, putative, expressed seq=cds; coord=6:68232049..68235900:-1; parent\_gene=GRMZM2G446253'

'moderately similar to ( 271) AT2G29560 | Symbols: | enolase, putative | chr2:12646635-12649694 FORWARDweakly similar to ( 171) ENO\_MESCR Enolase (EC 4.2.1.11) (2-phosphoglycerate dehydratase) (2-phospho-D-glycerate hydro-lyase) - Mesembryanthemum crystallinum (Common ice plant)moderately similar to ( 353) loc\_os03g15950 12003.m07032 protein enolase, putative, expressed seq=cds; coord=1:38632794..38636740:-1; parent\_gene=GRMZM2G481529'

'highly similar to ( 798) AT5G56350 | Symbols: | pyruvate kinase, putative | chr5:22820254-22822529 REVERSEhighly similar to ( 815) KPVC\_TOBAC Pyruvate kinase, cytosolic isozyme (EC 2.7.1.40) (PK) - Nicotiana tabacum (Common tobacco)highly similar to ( 909) loc\_os01g16960 12001.m08292 protein pyruvate kinase, cytosolic isozyme, putative, expressed seq=cds; coord=3:44223365..44228905:-1; parent\_gene=GRMZM2G003883'

'highly similar to ( 913) AT3G52990 | Symbols: | pyruvate kinase, putative | chr3:19649336-19652237 FORWARDmoderately similar to ( 376) KPYC\_TOBAC Pyruvate kinase, cytosolic isozyme (EC 2.7.1.40) (PK) - Nicotiana tabacum (Common tobacco)highly similar to ( 988) loc\_os11g05110 12011.m079911 protein pyruvate kinase, cytosolic isozyme, putative, expressed seq=cds; coord=10:4694280..4699187:-1; parent\_gene=GRMZM2G004534'

'highly similar to ( 870) AT5G08570 | Symbols: | pyruvate kinase, putative | chr5:2778433-2780300 FORWARDhighly similar to ( 875) KPYC\_SOYBN Pyruvate kinase, cytosolic isozyme (EC 2.7.1.40) (PK) - Glycine max (Soybean)highly similar to ( 961) loc\_os04g58110 12004.m10693 protein pyruvate kinase, cytosolic isozyme, putative, expressed seq=cds; coord=10:148228962..148233420:1; parent\_gene=GRMZM2G008714'

'highly similar to ( 904) AT3G52990 | Symbols: | pyruvate kinase, putative | chr3:19649336-19652237 FORWARDmoderately similar to ( 376) KPYC\_TOBAC Pyruvate kinase, cytosolic isozyme (EC 2.7.1.40) (PK) - Nicotiana tabacum (Common tobacco)highly similar to ( 979) loc\_os11g05110 12011.m079911 protein pyruvate kinase, cytosolic isozyme, putative, expressed seq=cds; coord=4:187884467..187890415:-1; parent\_gene=GRMZM2G119175'

'highly similar to ( 632) AT2G36580 | Symbols: | pyruvate kinase, putative | chr2:15339253-15342781 FORWARDmoderately similar to ( 322) KPYC\_SOLTU Pyruvate kinase, cytosolic isozyme (EC 2.7.1.40) (PK) - Solanum tuberosum (Potato)highly similar to ( 863) loc\_os11g10980 12011.m05291 protein pyruvate kinase, cytosolic isozyme, putative, expressed seq=cds; coord=4:12974975..12984124:-1; parent\_gene=GRMZM2G124593'

'highly similar to ( 863) AT5G08570 | Symbols: | pyruvate kinase, putative | chr5:2778433-2780300 FORWARDhighly similar to ( 876) KPYC\_SOYBN Pyruvate kinase, cytosolic isozyme (EC 2.7.1.40) (PK) - Glycine max (Soybean)highly similar to ( 958) loc\_os04g58110 12004.m10693 protein pyruvate kinase, cytosolic isozyme, putative, expressed seq=cds; coord=2:1624189..1628276:1; parent\_gene=GRMZM2G150098'

'highly similar to ( 993) AT1G23190 | Symbols: | phosphoglucomutase, cytoplasmic, putative / glucose phosphomutase, putative | chr1:8219946-8224186 FORWARDnearly identical (1160) PGM2\_MAIZE Phosphoglucomutase, cytoplasmic 2 (EC 5.4.2.2) (Glucose phosphomutase 2) (PGM 2) - Zea mays (Maize)nearly identical (1113) loc\_os03g50480 12003.m35578 protein phosphoglucomutase, cytoplasmic 2, putative, expressed seq=cds; coord=1:267887401..267893956:1; parent\_gene=GRMZM2G023289'

'highly similar to ( 971) AT1G23190 | Symbols: | phosphoglucomutase, cytoplasmic, putative / glucose phosphomutase, putative | chr1:8219946-8224186 FORWARDnearly identical (1135) PGM1\_MAIZE Phosphoglucomutase, cytoplasmic 1 (EC 5.4.2.2) (Glucose phosphomutase 1) (PGM 1) - Zea mays (Maize)nearly identical (1088) loc\_os03g50480 12003.m35578 protein phosphoglucomutase, cytoplasmic 2, putative, expressed seq=cds; coord=5:10855539..10861668:-1; parent\_gene=GRMZM2G109383'

'weakly similar to ( 108) AT5G42740 | Symbols: | glucose-6-phosphate isomerase, cytosolic (PGIC) | chr5:17136080-17140622 FORWARDweakly similar to ( 133) G6PI\_MAIZE Glucose-6-phosphate isomerase, cytosolic (EC 5.3.1.9) (GPI) (Phosphoglucose isomerase) (PGI) (Phosphohexose isomerase) (PHI) - Zea mays (Maize)weakly similar to ( 125) loc\_os06g14510 12006.m091669 protein glucose-6-phosphate isomerase, cytosolic B, putative, expressed seq=cds; coord=5:55400694..55403816:-1; parent\_gene=GRMZM2G162078'

'nearly identical (1012) AT1G76550 | Symbols: | pyrophosphate--fructose-6-phosphate 1-phosphotransferase alpha subunit, putative / pyrophosphate-dependent 6-phosphofructose-1-kinase, putative | chr1:28722900-28726929 REVERSEnearly identical (1024) PFFA\_RICCO Pyrophosphate--fructose 6-phosphate 1-phosphotransferase alpha subunit (EC 2.7.1.90) (PFP) (6-phosphofructokinase, pyrophosphate dependent) (Pyrophosphate-dependent 6-phosphofructose-1-kinase) (PPi-PFK) - Ricinus communis (Castor bean)nearly identical (1141) loc\_os02g48360 12002.m100340 protein pyrophosphate--fructose 6-phosphate 1-phosphotransferase alpha subunit, putative, expressed seq=cds; coord=4:162075480..162081835:-1; parent\_gene=GRMZM2G042502'

'highly similar to ( 892) AT1G12000 | Symbols: | pyrophosphate--fructose-6-phosphate 1-phosphotransferase beta subunit, putative / pyrophosphate-dependent 6-phosphofructose-1-kinase, putative | chr1:4050159-4053727 REVERSEhighly similar to ( 903) PFPB\_RICCO Pyrophosphate--fructose 6-phosphate 1-phosphotransferase subunit beta (EC 2.7.1.90) (PFP) (6-phosphofructokinase, pyrophosphate dependent) (Pyrophosphate-dependent 6-phosphofructose-1-kinase) (PPI-PFK) - Ricinus communis (Castor bean)highly similar to ( 988) loc\_os06g13810 12006.m31864 protein pyrophosphate--fructose 6-phosphate 1-phosphotransferase beta subunit, putative, expressed seq=cds; coord=6:115191842..115198242:-1; parent\_gene=GRMZM2G059151'

'nearly identical (1004) AT1G76550 | Symbols: | pyrophosphate--fructose-6-phosphate 1-phosphotransferase alpha subunit, putative / pyrophosphate-dependent 6-phosphofructose-1-kinase, putative | chr1:28722900-28726929 REVERSEnearly identical (1025) PFFA\_RICCO Pyrophosphate--fructose 6-phosphate 1-phosphotransferase alpha subunit (EC 2.7.1.90) (PFP) (6-phosphofructokinase, pyrophosphate dependent) (Pyrophosphate-dependent 6-phosphofructose-1-kinase) (PPI-PFK) - Ricinus communis (Castor bean)nearly identical (1138) loc\_os02g48360 12002.m100340 protein pyrophosphate--fructose 6-phosphate 1-phosphotransferase alpha subunit, putative, expressed seq=cds; coord=5:202565079..202572251:-1; parent\_gene=GRMZM2G123371'

'highly similar to ( 503) AT1G12000 | Symbols: | pyrophosphate--fructose-6-phosphate 1-phosphotransferase beta subunit, putative / pyrophosphate-dependent 6-phosphofructose-1-kinase, putative | chr1:4050159-4053727 REVERSEhighly similar to ( 512) PFPB\_RICCO Pyrophosphate--fructose 6-phosphate 1-phosphotransferase subunit beta (EC 2.7.1.90) (PFP) (6-phosphofructokinase, pyrophosphate dependent) (Pyrophosphate-dependent 6-phosphofructose-1-kinase) (PPI-PFK) - Ricinus communis (Castor bean)highly similar to ( 551) loc\_os06g13810 12006.m31864 protein pyrophosphate--fructose 6-phosphate 1-phosphotransferase beta subunit, putative, expressed seq=cds; coord=9:1634017..1638812:-1; parent\_gene=GRMZM2G143862'

'highly similar to ( 528) AT1G76550 | Symbols: | pyrophosphate--fructose-6-phosphate 1-phosphotransferase alpha subunit, putative / pyrophosphate-dependent 6-phosphofructose-1-kinase, putative | chr1:28722900-28726929 REVERSEhighly similar to ( 545) PFFA\_RICCO Pyrophosphate--fructose 6-phosphate 1-phosphotransferase alpha subunit (EC 2.7.1.90) (PFP) (6-phosphofructokinase, pyrophosphate dependent) (Pyrophosphate-dependent 6-phosphofructose-1-kinase) (PPI-PFK) - Ricinus communis (Castor bean)highly similar to ( 588) loc\_os06g22060 12006.m091682 protein pyrophosphate--fructose 6-phosphate 1-phosphotransferase alpha subunit, putative, expressed seq=cds; coord=9:45354730..45357776:1; parent\_gene=GRMZM2G314094'

'weakly similar to ( 135) AT1G20950 | Symbols: | pyrophosphate--fructose-6-phosphate 1-phosphotransferase-related / pyrophosphate-dependent 6-phosphofructose-1-kinase-related | chr1:7297467-7301336 REVERSEweakly similar to ( 137) PFFA\_SOLTU Pyrophosphate--fructose 6-phosphate 1-phosphotransferase alpha subunit (EC 2.7.1.90) (PFP) (6-phosphofructokinase, pyrophosphate dependent) (Pyrophosphate-dependent 6-phosphofructose-1-kinase) (PPI-PFK) - Solanum tuberosum (Potato)weakly similar to ( 144) loc\_os06g22060 12006.m091682 protein pyrophosphate--fructose 6-phosphate 1-phosphotransferase alpha subunit, putative, expressed seq=cds; coord=8:20537432..20541080:-1; parent\_gene=GRMZM2G402211'

'highly similar to ( 667) AT1G76550 | Symbols: | pyrophosphate--fructose-6-phosphate 1-phosphotransferase alpha subunit, putative / pyrophosphate-dependent 6-phosphofructose-1-kinase, putative | chr1:28722900-28726929 REVERSEhighly similar to ( 699) PFFA\_RICCO Pyrophosphate--fructose 6-phosphate 1-phosphotransferase alpha subunit (EC 2.7.1.90) (PFP) (6-phosphofructokinase, pyrophosphate dependent) (Pyrophosphate-dependent 6-phosphofructose-1-kinase) (PPI-PFK) - Ricinus communis (Castor bean)highly similar to ( 805) loc\_os08g25720 12008.m26670 protein pyrophosphate--fructose 6-phosphate 1-phosphotransferase alpha subunit, putative, expressed seq=cds; coord=7:82320997..82325866:1; parent\_gene=GRMZM2G409131'

'weakly similar to ( 101) AT1G76550 | Symbols: | pyrophosphate--fructose-6-phosphate 1-phosphotransferase alpha subunit, putative / pyrophosphate-dependent 6-phosphofructose-1-kinase, putative | chr1:28722900-28726929 REVERSEweakly similar to ( 101) PFFA\_SOLTU Pyrophosphate--fructose 6-phosphate 1-phosphotransferase alpha subunit (EC 2.7.1.90) (PFP) (6-phosphofructokinase, pyrophosphate dependent) (Pyrophosphate-dependent 6-phosphofructose-1-kinase) (PPI-PFK) - Solanum tuberosum (Potato)weakly similar to ( 103) loc\_os06g22060 12006.m091682 protein pyrophosphate--fructose 6-phosphate 1-phosphotransferase alpha subunit, putative, expressed seq=cds; coord=4:91184550..91192853:1; parent\_gene=GRMZM2G413226'



'highly similar to ( 815) AT1G76550 | Symbols: | pyrophosphate--fructose-6-phosphate 1-phosphotransferase alpha subunit, putative / pyrophosphate-dependent 6-phosphofructose-1-kinase, putative | chr1:28722900-28726929 REVERSEhighly similar to ( 858) PFPA\_RICCO Pyrophosphate--fructose 6-phosphate 1-phosphotransferase alpha subunit (EC 2.7.1.90) (PFP) (6-phosphofructokinase, pyrophosphate dependent) (Pyrophosphate-dependent 6-phosphofructose-1-kinase) (PPI-PFK) - Ricinus communis (Castor bean)nearly identical (1137) loc\_os08g25720 12008.m26670 protein pyrophosphate--fructose 6-phosphate 1-phosphotransferase alpha subunit, putative, expressed seq=cds; coord=1:221739264..221743951:-1; parent\_gene=GRMZM2G450163'

'very weakly similar to (84.7) loc\_os06g13810 12006.m31864 protein pyrophosphate--fructose 6-phosphate 1-phosphotransferase beta subunit, putative, expressed seq=cds; coord=8:85421696..85424667:-1; parent\_gene=AC194439.3\_FG002'

'weakly similar to ( 136) AT1G76550 | Symbols: | pyrophosphate--fructose-6-phosphate 1-phosphotransferase alpha subunit, putative / pyrophosphate-dependent 6-phosphofructose-1-kinase, putative | chr1:28722900-28726929 REVERSEweakly similar to ( 138) PFPA\_SOLTU Pyrophosphate--fructose 6-phosphate 1-phosphotransferase alpha subunit (EC 2.7.1.90) (PFP) (6-phosphofructokinase, pyrophosphate dependent) (Pyrophosphate-dependent 6-phosphofructose-1-kinase) (PPI-PFK) - Solanum tuberosum (Potato)weakly similar to ( 174) loc\_os02g48360 12002.m100340 protein pyrophosphate--fructose 6-phosphate 1-phosphotransferase alpha subunit, putative, expressed seq=cds; coord=1:35141959..35147250:-1; parent\_gene=AC205100.3\_FG001'

'moderately similar to ( 378) AT3G55440 | Symbols: ATCTIMC, TPI | TPI (TRIOSEPHOSPHATE ISOMERASE); triose-phosphate isomerase | chr3:20553794-20556078 FORWARDmoderately similar to ( 442) TPIS\_MAIZE Triosephosphate isomerase, cytosolic (EC 5.3.1.1) (TIM) (Triose-phosphate isomerase) - Zea mays (Maize)moderately similar to ( 413) loc\_os01g05490 12001.m42862 protein triosephosphate isomerase, cytosolic, putative, expressed seq=cds; coord=8:14389329..14393515:-1; parent\_gene=GRMZM2G018177'

'weakly similar to ( 131) AT3G55440 | Symbols: ATCTIMC, TPI | TPI (TRIOSEPHOSPHATE ISOMERASE); triose-phosphate isomerase | chr3:20553794-20556078 FORWARDweakly similar to ( 167) TPIS\_MAIZE Triosephosphate isomerase, cytosolic (EC 5.3.1.1) (TIM) (Triose-phosphate isomerase) - Zea mays (Maize)weakly similar to ( 147) loc\_os01g05490 12001.m42862 protein triosephosphate isomerase, cytosolic, putative, expressed seq=cds; coord=3:41139121..41168207:-1; parent\_gene=GRMZM2G026182'

'moderately similar to ( 386) AT3G55440 | Symbols: ATCTIMC, TPI | TPI (TRIOSEPHOSPHATE ISOMERASE); triose-phosphate isomerase | chr3:20553794-20556078 FORWARDmoderately similar to ( 465) TPIS\_MAIZE Triosephosphate isomerase, cytosolic (EC 5.3.1.1) (TIM) (Triose-phosphate isomerase) - Zea mays (Maize)moderately similar to ( 425) loc\_os01g05490 12001.m42862 protein triosephosphate isomerase, cytosolic, putative, expressed seq=cds; coord=3:17824258..17828243:1; parent\_gene=GRMZM2G030784'

'moderately similar to ( 288) AT3G55440 | Symbols: ATCTIMC, TPI | TPI (TRIOSEPHOSPHATE ISOMERASE); triose-phosphate isomerase | chr3:20553794-20556078 FORWARDmoderately similar to ( 303) TPIS\_ORYSA Triosephosphate isomerase, cytosolic (EC 5.3.1.1) (TIM) (Triose-phosphate isomerase) - Oryza sativa (Rice)moderately similar to ( 325) loc\_os01g62420 12001.m43510 protein triosephosphate isomerase, cytosolic, putative, expressed seq=cds; coord=8:168746526..168749489:1; parent\_gene=GRMZM2G146206'

'weakly similar to ( 180) AT1G79600 | Symbols: | ABC1 family protein | chr1:29950105-29952516 REVERSEweakly similar to ( 174) TPIS\_ORYSA Triosephosphate isomerase, cytosolic (EC 5.3.1.1) (TIM) (Triose-phosphate isomerase) - Oryza sativa (Rice)weakly similar to ( 193) loc\_os10g24954 12010.m05448 protein ulp1 protease family, C-terminal catalytic domain containing protein seq=cds; coord=7:12403371..12439528:-1; parent\_gene=GRMZM2G346168'

'weakly similar to ( 134) AT3G55440 | Symbols: ATCTIMC, TPI | TPI (TRIOSEPHOSPHATE ISOMERASE); triose-phosphate isomerase | chr3:20553794-20556078 FORWARDweakly similar to ( 171) TPIS\_MAIZE Triosephosphate isomerase, cytosolic (EC 5.3.1.1) (TIM) (Triose-phosphate isomerase) - Zea mays (Maize)weakly similar to ( 152) loc\_os01g05490 12001.m42862 protein triosephosphate isomerase, cytosolic, putative, expressed seq=cds; coord=1:291031923..291034017:1; parent\_gene=GRMZM2G370275'

'weakly similar to ( 190) AT1G15060 | Symbols: | LOCATED IN: chloroplast; EXPRESSED IN: 23 plant structures; EXPRESSED DURING: 14 growth stages; CONTAINS InterPro DOMAIN/s: Uncharacterised conserved protein UCP031088, alpha/beta hydrolase, At1g15070 (InterPro:IPR016969); BEST Arabidopsis thaliana protein match is: unknown protein (TAIR:AT1G73750.1); Has 120 Blast hits to 104 proteins in 29 species: Archae - 0; Bacteria - 61; Metazoa - 1; Fungi - 0; Plants - 47; Viruses - 0; Other Eukaryotes - 11 (source: NCBI BLINK). | chr1:5184053-5186856 REVERSEweakly similar to ( 150) TPIS\_ORYSA Triosephosphate isomerase, cytosolic (EC 5.3.1.1) (TIM) (Triose-phosphate isomerase) - Oryza sativa (Rice)moderately similar to ( 250) loc\_os08g27050 12008.m06718 protein expressed protein seq=cds; coord=1:201403651..201409528:-1; parent\_gene=GRMZM2G419024'

'weakly similar to ( 128) AT3G55440 | Symbols: ATCTIMC, TPI | TPI (TRIOSEPHOSPHATE ISOMERASE); triose-phosphate isomerase | chr3:20553794-20556078 FORWARDweakly similar to ( 165) TPIS\_MAIZE Triosephosphate isomerase, cytosolic (EC 5.3.1.1) (TIM) (Triose-phosphate isomerase) - Zea mays (Maize)weakly similar to ( 146) loc\_os01g05490 12001.m42862 protein triosephosphate isomerase, cytosolic, putative, expressed seq=cds; coord=1:111127564..111131693:1; parent\_gene=GRMZM2G435244'

'moderately similar to ( 213) AT3G55440 | Symbols: ATCTIMC, TPI | TPI (TRIOSEPHOSPHATE ISOMERASE); triose-phosphate isomerase | chr3:20553794-20556078 FORWARDmoderately similar to ( 227) TPIS\_ORYSA Triosephosphate isomerase, cytosolic (EC 5.3.1.1) (TIM) (Triose-phosphate isomerase) - Oryza sativa (Rice)moderately similar to ( 237) loc\_os01g62420 12001.m43510 protein triosephosphate isomerase, cytosolic, putative, expressed seq=cds; coord=8:82623182..82640943:1; parent\_gene=GRMZM2G439389'

'highly similar to ( 550) AT3G04120 | Symbols: GAPC, GAPC-1, GAPC1 | GAPC1 (GLYCERALDEHYDE-3-PHOSPHATE DEHYDROGENASE C SUBUNIT 1); glyceraldehyde-3-phosphate dehydrogenase (phosphorylating)/ glyceraldehyde-3-phosphate dehydrogenase | chr3:1081077-1083131 FORWARDhighly similar to ( 638) G3PC\_MAIZE Glyceraldehyde-3-phosphate dehydrogenase, cytosolic 1 (EC 1.2.1.12) - Zea mays (Maize)highly similar to ( 596) loc\_os08g03290 12008.m26460 protein glyceraldehyde-3-phosphate dehydrogenase, cytosolic, putative, expressed seq=cds; coord=4:36880092..36884475:-1; parent\_gene=GRMZM2G046804'

'highly similar to ( 590) AT1G16300 | Symbols: GAPCP-2 | GAPCP-2; NAD or NADH binding / binding / catalytic/ glyceraldehyde-3-phosphate dehydrogenase (phosphorylating)/ glyceraldehyde-3-phosphate dehydrogenase | chr1:5574433-5577406 FORWARDmoderately similar to ( 481) G3PC\_PINSY Glyceraldehyde-3-phosphate dehydrogenase, cytosolic (EC 1.2.1.12) - Pinus sylvestris (Scots pine)highly similar to ( 678) loc\_os02g07490 12002.m06096 protein glyceraldehyde-3-phosphate dehydrogenase, cytosolic, putative, expressed seq=cds; coord=4:236083133..236088143:-1; parent\_gene=GRMZM2G051004'

'highly similar to ( 561) AT1G13440 | Symbols: GAPC-2, GAPC2 | GAPC2 (GLYCERALDEHYDE-3-PHOSPHATE DEHYDROGENASE C2); NAD or NADH binding / binding / catalytic/ glyceraldehyde-3-phosphate dehydrogenase (phosphorylating)/ glyceraldehyde-3-phosphate dehydrogenase | chr1:4608465-4610494 REVERSEhighly similar to ( 641) G3PE\_MAIZE Glyceraldehyde-3-phosphate dehydrogenase, cytosolic 3 (EC 1.2.1.12) - Zea mays (Maize)highly similar to ( 602) loc\_os04g40950 12004.m35161 protein glyceraldehyde-3-phosphate dehydrogenase, cytosolic 3, putative, expressed seq=cds; coord=4:133103720..133107109:1; parent\_gene=GRMZM2G071630'

'highly similar to ( 597) AT1G79530 | Symbols: GAPCP-1 | GAPCP-1 (GLYCERALDEHYDE-3-PHOSPHATE DEHYDROGENASE OF PLASTID 1); NAD or NADH binding / binding / catalytic/ glyceraldehyde-3-phosphate dehydrogenase (phosphorylating)/ glyceraldehyde-3-phosphate dehydrogenase | chr1:29916232-29919088 REVERSEmoderately similar to ( 483) G3PC\_GINBI Glyceraldehyde-3-phosphate dehydrogenase, cytosolic (EC 1.2.1.12) - Ginkgo biloba (Ginkgo)highly similar to ( 693) loc\_os02g07490 12002.m06096 protein glyceraldehyde-3-phosphate dehydrogenase, cytosolic, putative, expressed seq=cds; coord=5:85252669..85257667:1; parent\_gene=GRMZM2G104632'

'highly similar to ( 561) AT1G13440 | Symbols: GAPC-2, GAPC2 | GAPC2 (GLYCERALDEHYDE-3-PHOSPHATE DEHYDROGENASE C2); NAD or NADH binding / binding / catalytic/ glyceraldehyde-3-phosphate dehydrogenase (phosphorylating)/ glyceraldehyde-3-phosphate dehydrogenase | chr1:4608465 4610494 REVERSEhighly similar to ( 639) G3PE\_MAIZE Glyceraldehyde-3-phosphate dehydrogenase, cytosolic 3 (EC 1.2.1.12) - Zea mays (Maize)highly similar to ( 602) loc\_os04g40950 12004.m35161 protein glyceraldehyde-3-phosphate dehydrogenase, cytosolic 3, putative, expressed seq=cds; coord=5:181520274..181524899:1; parent\_gene=GRMZM2G176307'

'moderately similar to ( 484) AT3G04120 | Symbols: GAPC, GAPC-1, GAPC1 | GAPC1 (GLYCERALDEHYDE-3-PHOSPHATE DEHYDROGENASE C SUBUNIT 1); glyceraldehyde-3-phosphate dehydrogenase (phosphorylating)/ glyceraldehyde-3-phosphate dehydrogenase | chr3:1081077-1083131 FORWARDhighly similar to ( 557) G3PD\_MAIZE Glyceraldehyde-3-phosphate dehydrogenase, cytosolic 2 (EC 1.2.1.12) - Zea mays (Maize)highly similar to ( 519) loc\_os08g03290 12008.m26460 protein glyceraldehyde-3-phosphate dehydrogenase, cytosolic, putative, expressed seq=cds; coord=6:6898695..6903246:-1; parent\_gene=GRMZM2G180625'

'weakly similar to ( 105) AT1G79530 | Symbols: GAPCP-1 | GAPCP-1 (GLYCERALDEHYDE-3-PHOSPHATE DEHYDROGENASE OF PLASTID 1); NAD or NADH binding / binding / catalytic/ glyceraldehyde-3-phosphate dehydrogenase (phosphorylating)/ glyceraldehyde-3-phosphate dehydrogenase | chr1:29916232-29919088 REVERSEweakly similar to ( 102) G3PC\_DIACA Glyceraldehyde-3-phosphate dehydrogenase, cytosolic (EC 1.2.1.12) - Dianthus caryophyllus (Carnation) (Clove pink)weakly similar to ( 121) loc\_os02g07490 12002.m06096 protein glyceraldehyde-3-phosphate dehydrogenase, cytosolic, putative, expressed seq=cds; coord=5:125696952..125703045:-1; parent\_gene=GRMZM2G435438'

'very weakly similar to (92.8) AT1G79530 | Symbols: GAPCP-1 | GAPCP-1 (GLYCERALDEHYDE-3-PHOSPHATE DEHYDROGENASE OF PLASTID 1); NAD or NADH binding / binding / catalytic/ glyceraldehyde-3-phosphate dehydrogenase (phosphorylating)/ glyceraldehyde-3-phosphate dehydrogenase | chr1:29916232-29919088 REVERSEvery weakly similar to (89.7) G3PC\_DIACA Glyceraldehyde-3-phosphate dehydrogenase, cytosolic (EC 1.2.1.12) - Dianthus caryophyllus (Carnation) (Clove pink)weakly similar to ( 106) loc\_os02g07490 12002.m06096 protein glyceraldehyde-3-phosphate dehydrogenase, cytosolic, putative, expressed seq=cds; coord=5:152391580..152396412:1; parent\_gene=GRMZM2G462894'

'highly similar to ( 723) AT1G32440 | Symbols: PKP3 | PKP3 (plastidial pyruvate kinase 3); pyruvate kinase | chr1:11712205-11714963 FORWARDhighly similar to ( 769) KPYG\_TOBAC Pyruvate kinase isozyme G, chloroplast precursor (EC 2.7.1.40) - Nicotiana tabacum (Common tobacco)highly similar to ( 912) loc\_os10g42100 12010.m06967 protein pyruvate kinase isozyme G, chloroplast precursor, putative, expressed seq=cds; coord=1:97673409..97679050:1; parent\_gene=GRMZM2G033526'

'highly similar to ( 867) AT3G22960 | Symbols: PKP1, PKP-ALPHA | PKP-ALPHA; pyruvate kinase | chr3:8139369-8141771 FORWARDhighly similar to ( 885) KPYA\_RICCO Pyruvate kinase isozyme A, chloroplast precursor (EC 2.7.1.40) - Ricinus communis (Castor bean)highly similar to ( 928) loc\_os07g08340 12007.m28952 protein pyruvate kinase isozyme A, chloroplast precursor, putative, expressed seq=cds; coord=7:10513154..10517482:1; parent\_gene=GRMZM2G066290'

'highly similar to ( 842) AT3G22960 | Symbols: PKP1, PKP-ALPHA | PKP-ALPHA; pyruvate kinase | chr3:8139369-8141771 FORWARDhighly similar to ( 853) KPYA\_RICCO Pyruvate kinase isozyme A, chloroplast precursor (EC 2.7.1.40) - Ricinus communis (Castor bean)highly similar to ( 875) loc\_os07g08340 12007.m28952 protein pyruvate kinase isozyme A, chloroplast precursor, putative, expressed seq=cds; coord=1:287888635..287892994:1; parent\_gene=GRMZM2G078200'

'highly similar to ( 718) AT5G52920 | Symbols: PKP1, PKP-BETA1, PKP2 | PKP-BETA1 (PLASTIDIC PYRUVATE KINASE BETA SUBUNIT 1); pyruvate kinase | chr5:21463680-21466612 FORWARDhighly similar to ( 756) KPYG\_TOBAC Pyruvate kinase isozyme G, chloroplast precursor (EC 2.7.1.40) - Nicotiana tabacum (Common tobacco)highly similar to ( 897) loc\_os10g42100 12010.m06967 protein pyruvate kinase isozyme G, chloroplast precursor, putative, expressed seq=cds; coord=9:113470642..113476065:-1; parent\_gene=GRMZM2G144730'

'highly similar to ( 860) AT5G52920 | Symbols: PKP1, PKP-BETA1, PKP2 | PKP-BETA1 (PLASTIDIC PYRUVATE KINASE BETA SUBUNIT 1); pyruvate kinase | chr5:21463680-21466612 FORWARDhighly similar to ( 743) KPYG\_TOBAC Pyruvate kinase isozyme G, chloroplast precursor (EC 2.7.1.40) - Nicotiana tabacum (Common tobacco)nearly identical (1006) loc\_os01g47080 12001.m10904 protein pyruvate kinase isozyme G, chloroplast precursor, putative, expressed seq=cds; coord=3:211977378..211987454:1; parent\_gene=GRMZM2G152686'

'highly similar to ( 585) AT3G22960 | Symbols: PKP1, PKP-ALPHA | PKP-ALPHA; pyruvate kinase | chr3:8139369-8141771 FORWARDhighly similar to ( 589) KPYA\_RICCO Pyruvate kinase isozyme A, chloroplast precursor (EC 2.7.1.40) - Ricinus communis (Castor bean)highly similar to ( 934) loc\_os03g46910 12003.m09706 protein pyruvate kinase isozyme A, chloroplast precursor, putative, expressed seq=cds; coord=1:257484405..257489535:1; parent\_gene=GRMZM2G177947'

'highly similar to ( 741) AT1G70820 | Symbols: | phosphoglucomutase, putative / glucose phosphomutase, putative | chr1:26705594-26708034 FORWARDhighly similar to ( 882) loc\_os06g28194 12006.m71405 protein phosphoglucomutase/phosphomannomutase family protein, putative, expressed seq=cds; coord=7:78785098..78787882:1; parent\_gene=GRMZM2G067908'

'moderately similar to ( 432) AT2G22480 | Symbols: PFK5 | PFK5 (PHOSPHOFRUCTOKINASE 5); 6-phosphofructokinase | chr2:9545670-9548414 FORWARDhighly similar to ( 511) loc\_os10g26570 12010.m05597 protein pyrophosphate--fructose 6-phosphate 1-phosphotransferase, putative, expressed seq=cds; coord=1:242911988..242916942:1; parent\_gene=GRMZM2G009591'

'moderately similar to ( 499) AT5G61580 | Symbols: PFK4 | PFK4 (PHOSPHOFRUCTOKINASE 4); 6-phosphofructokinase | chr5:24761150-24763827 FORWARDhighly similar to ( 596) loc\_os01g09570 12001.m07582 protein 6-phosphofructokinase 2, putative, expressed seq=cds; coord=8:20698287..20701876:-1; parent\_gene=GRMZM2G080375'

'moderately similar to ( 315) AT2G22480 | Symbols: PFK5 | PFK5 (PHOSPHOFRUCTOKINASE 5); 6-phosphofructokinase | chr2:9545670-9548414 FORWARDmoderately similar to ( 454) loc\_os08g34050 12008.m07394 protein 6-phosphofructokinase 2, putative seq=cds; coord=1:212484786..212489531:1; parent\_gene=GRMZM2G139360'

'weakly similar to ( 137) AT2G22480 | Symbols: PFK5 | PFK5 (PHOSPHOFRUCTOKINASE 5); 6-phosphofructokinase | chr2:9545670-9548414 FORWARDweakly similar to ( 200) loc\_os10g26570 12010.m05597 protein pyrophosphate--fructose 6-phosphate 1-phosphotransferase, putative, expressed seq=cds; coord=3:86662282..86666591:1; parent\_gene=GRMZM2G168716'

'highly similar to ( 728) AT5G17310 | Symbols: | UTP--glucose-1-phosphate uridylyltransferase, putative / UDP-glucose pyrophosphorylase, putative / UGPase, putative | chr5:5696955-5700845 REVERSEhighly similar to ( 796) UGPA\_HORVU UTP--glucose-1-phosphate uridylyltransferase (EC 2.7.7.9) (UDP-glucose pyrophosphorylase) (UDPGP) (UGPase) - Hordeum vulgare (Barley)highly similar to ( 805) loc\_os09g38030 12009.m22190 protein UTP--glucose-1-phosphate uridylyltransferase, putative, expressed seq=cds; coord=7:146491263..146498155:-1; parent\_gene=GRMZM2G032003'

'moderately similar to ( 475) AT5G17310 | Symbols: | UTP--glucose-1-phosphate uridylyltransferase, putative / UDP-glucose pyrophosphorylase, putative / UGPase, putative | chr5:5696955-5700845 REVERSEmoderately similar to ( 487) UGPA\_HORVU UTP--glucose-1-phosphate uridylyltransferase (EC 2.7.7.9) (UDP-glucose pyrophosphorylase) (UDPGP) (UGPase) - Hordeum vulgare (Barley)highly similar to ( 540) loc\_os02g02560 12002.m05605 protein UTP--glucose-1-phosphate uridylyltransferase, putative, expressed seq=cds; coord=5:70040845..70045236:-1; parent\_gene=GRMZM2G098370'

'highly similar to ( 934) AT5G51820 | Symbols: PGM, ATPGMP, PGM1, STF1 | PGM (PHOSPHOGLUCOMUTASE); phosphoglucomutase | chr5:21063531-21067933 REVERSEhighly similar to ( 935) PGMP\_PEA Phosphoglucomutase, chloroplast precursor (EC 5.4.2.2) (Glucose phosphomutase) (PGM) - Pisum sativum (Garden pea)nearly identical (1050) loc\_os10g11140 12010.m065237 protein phosphoglucomutase, chloroplast precursor, putative, expressed seq=cds; coord=3:218264781..218273042:1; parent\_gene=GRMZM2G025854'

'highly similar to ( 732) AT5G17530 | Symbols: | phosphoglucomutase family protein | chr5:5778168-5781863 FORWARDhighly similar to ( 870) loc\_os07g26610 12007.m06939 protein phosphoglucomutase/phosphomannomutase family protein, putative, expressed seq=cds; coord=7:41731651..41795285:-1; parent\_gene=GRMZM2G069676'

'weakly similar to ( 123) AT5G17530 | Symbols: | phosphoglucomutase family protein | chr5:5778168-5781863 FORWARDweakly similar to ( 155) loc\_os07g26610 12007.m06939 protein phosphoglucomutase/phosphomannomutase family protein, putative, expressed seq=cds; coord=5:149809877..149811098:1; parent\_gene=GRMZM2G173668'

'moderately similar to ( 424) AT4G24620 | Symbols: PGI1, PGI | PGI1 (PHOSPHOGLUCOSE ISOMERASE 1); glucose-6-phosphate isomerase | chr4:12709097-12712610 REVERSEvery weakly similar to ( 80.5) G6PI\_MAIZE Glucose-6-phosphate isomerase, cytosolic (EC 5.3.1.9) (GPI) (Phosphoglucose isomerase) (PGI) (Phosphohexose isomerase) (PHI) - Zea mays (Maize)highly similar to ( 508) loc\_os09g29070 12009.m22122 protein glucose-6-phosphate isomerase, putative, expressed seq=cds; coord=2:187379328..187383441:1; parent\_gene=GRMZM2G076075'

'highly similar to ( 887) AT4G24620 | Symbols: PGI1, PGI | PGI1 (PHOSPHOGLUCOSE ISOMERASE 1); glucose-6-phosphate isomerase | chr4:12709097-12712610 REVERSEweakly similar to ( 124) G6PI\_SPIOL Glucose-6-phosphate isomerase, cytosolic (EC 5.3.1.9) (GPI) (Phosphoglucose isomerase) (PGI) (Phosphohexose isomerase) (PHI) - Spinacia oleracea (Spinach)nearly identical (1023) loc\_os09g29070 12009.m22122 protein glucose-6-phosphate isomerase, putative, expressed seq=cds; coord=7:127859191..127864034:-1; parent\_gene=GRMZM2G140614'

'highly similar to ( 708) AT4G26270 | Symbols: PFK3 | PFK3 (PHOSPHOFRUCTOKINASE 3); 6-phosphofructokinase | chr4:13301094-13304030 REVERSEvery weakly similar to ( 80.1) PFPB\_RICCO Pyrophosphate--fructose 6-phosphate 1-phosphotransferase subunit beta (EC 2.7.1.90) (PFP) (6-phosphofructokinase, pyrophosphate dependent) (Pyrophosphate-dependent 6-phosphofructose-1-kinase) (PPi-PFK) - Ricinus communis (Castor bean)highly similar to ( 983) loc\_os05g44922 12005.m28064 protein 6-phosphofructokinase, putative, expressed seq=cds; coord=6:160034201..160039816:-1; parent\_gene=GRMZM2G004932'

'very weakly similar to ( 88.6) loc\_os09g30240 12009.m06175 protein 6-phosphofructokinase, putative, expressed seq=cds; coord=7:131031531..131041187:1; parent\_gene=GRMZM2G031613'

'highly similar to ( 724) AT2G22480 | Symbols: PFK5 | PFK5 (PHOSPHOFRUCTOKINASE 5); 6-phosphofructokinase | chr2:9545670-9548414 FORWARDhighly similar to ( 948) loc\_os09g24910 12009.m05645 protein 6-phosphofructokinase 2, putative, expressed seq=cds; coord=2:181110668..181120123:1; parent\_gene=GRMZM2G127717'

'highly similar to ( 734) AT4G26270 | Symbols: PFK3 | PFK3 (PHOSPHOFRUCTOKINASE 3); 6-phosphofructokinase | chr4:13301094-13304030 REVERSEhighly similar to ( 939) loc\_os01g09570 12001.m07582 protein 6-phosphofructokinase 2, putative, expressed seq=cds; coord=3:6801004..6804943:-1; parent\_gene=GRMZM2G132069'

'highly similar to ( 686) AT4G26270 | Symbols: PFK3 | PFK3 (PHOSPHOFRUCTOKINASE 3); 6-phosphofructokinase | chr4:13301094-13304030 REVERSEvery weakly similar to ( 80.9) PFPB\_RICCO Pyrophosphate--fructose 6-phosphate 1-phosphotransferase subunit beta (EC 2.7.1.90) (PFP) (6-phosphofructokinase, pyrophosphate dependent) (Pyrophosphate-dependent 6-phosphofructose-1-kinase) (PPi-PFK) - Ricinus communis (Castor bean)highly similar to ( 833) loc\_os05g10650 12005.m05536 protein 6-phosphofructokinase 2, putative, expressed seq=cds; coord=6:132794943..132797295:-1; parent\_gene=GRMZM2G401970'

'highly similar to ( 758) AT5G56630 | Symbols: PFK7 | PFK7 (PHOSPHOFRUCTOKINASE 7); 6-phosphofructokinase | chr5:22924311-22926728 FORWARDhighly similar to ( 899) loc\_os06g05860 12006.m05312 protein 6-phosphofructokinase, putative, expressed seq=cds; coord=9:19154953..19160236:1; parent\_gene=GRMZM2G443985'

'very weakly similar to ( 99.8) loc\_os10g26570 12010.m05597 protein pyrophosphate--fructose 6-phosphate 1-phosphotransferase, putative, expressed seq=cds; coord=6:17569537..17576810:1; parent\_gene=GRMZM2G171796'

'moderately similar to ( 445) AT4G17260 | Symbols: | L-lactate dehydrogenase, putative | chr4:9674057-9675309 FORWARDhighly similar to ( 620) LDH\_MAIZE L-lactate dehydrogenase (EC 1.1.1.27) (LDH) - Zea mays (Maize)highly similar to ( 580) loc\_os02g01510 12002.m05501 protein L-lactate dehydrogenase A, putative, expressed seq=cds; coord=5:67403566..67405443:1; parent\_gene=GRMZM2G128929'

'moderately similar to ( 422) AT4G17260 | Symbols: | L-lactate dehydrogenase, putative | chr4:9674057-9675309 FORWARDhighly similar to ( 528) LDH\_MAIZE L-lactate dehydrogenase (EC 1.1.1.27) (LDH) - Zea mays (Maize)highly similar to ( 561) loc\_os02g01510 12002.m05501 protein L-lactate dehydrogenase A, putative, expressed seq=cds; coord=5:67473287..67474604:1; parent\_gene=GRMZM2G173192'

'highly similar to ( 825) AT5G54960 | Symbols: PDC2 | PDC2 (pyruvate decarboxylase-2); carboxy-lyase/ catalytic/ magnesium ion binding / pyruvate decarboxylase/ thiamin pyrophosphate binding | chr5:22310858-22312681 REVERSEhighly similar to ( 849) PDC1\_MAIZE Pyruvate decarboxylase isozyme 1 (EC 4.1.1.1) (PDC) - Zea mays (Maize)highly similar to ( 943) loc\_os01g06660 12001.m150484 protein pyruvate decarboxylase isozyme 1, putative, expressed seq=cds; coord=8:15548387..15551947:-1; parent\_gene=GRMZM2G038821'

'highly similar to ( 852) AT4G33070 | Symbols: | pyruvate decarboxylase, putative | chr4:15952519-15954676 REVERSEhighly similar to ( 917) PDC2\_ORYSA Pyruvate decarboxylase isozyme 2 (EC 4.1.1.1) (PDC) - Oryza sativa (Rice)highly similar to ( 917) loc\_os03g18220 12003.m101116 protein pyruvate decarboxylase isozyme 2, putative, expressed seq=cds; coord=7:174746426..174748651:1; parent\_gene=GRMZM2G434792'

'highly similar to ( 937) AT4G33070 | Symbols: | pyruvate decarboxylase, putative | chr4:15952519-15954676 REVERSEnearly identical (1157) PDC1\_MAIZE Pyruvate decarboxylase isozyme 1 (EC 4.1.1.1) (PDC) - Zea mays (Maize)nearly identical (1097) loc\_os05g39310 12005.m08110 protein pyruvate decarboxylase isozyme 1, putative, expressed seq=cds; coord=8:118165588..118167724:1; parent\_gene=AC197705.4\_FG001'

'highly similar to ( 627) AT1G77120 | Symbols: ADH1, ADH, ATADH, ATADH1 | ADH1 (ALCOHOL DEHYDROGENASE 1); alcohol dehydrogenase | chr1:28975509-28977216 FORWARDhighly similar to ( 751) ADH2\_MAIZE Alcohol dehydrogenase 2 (EC 1.1.1.1) - Zea mays (Maize)highly similar to ( 715) loc\_os11g10510 12011.m05246 protein alcohol dehydrogenase 2, putative, expressed seq=cds; coord=4:13395375..13398777:-1; parent\_gene=GRMZM2G098346'

'highly similar to ( 580) AT1G77120 | Symbols: ADH1, ADH, ATADH, ATADH1 | ADH1 (ALCOHOL DEHYDROGENASE 1); alcohol dehydrogenase | chr1:28975509-28977216 FORWARDhighly similar to ( 691) ADH1\_MAIZE Alcohol dehydrogenase 1 (EC 1.1.1.1) - Zea mays (Maize)highly similar to ( 669) loc\_os11g10480 12011.m28756 protein alcohol dehydrogenase 1, putative, expressed seq=cds; coord=1:273983252..273986222:-1; parent\_gene=GRMZM2G442658'

'highly similar to ( 796) AT3G58750 | Symbols: CSY2 | CSY2 (citrate synthase 2); citrate (SI)-synthase | chr3:21724564-21727458 REVERSEhighly similar to ( 795) CYSZ\_CUCMA Citrate synthase, glyoxysomal precursor (EC 2.3.3.1) (GCS) - Cucurbita maxima (Pumpkin) (Winter squash)highly similar to ( 867) loc\_os02g13840 12002.m06630 protein citrate synthase, glyoxysomal precursor, putative, expressed seq=cds; coord=5:149458858..149463589:-1; parent\_gene=GRMZM2G135588'

'highly similar to ( 556) AT5G09660 | Symbols: PMDH2 | PMDH2 (peroxisomal NAD-malate dehydrogenase 2); malate dehydrogenase | chr5:2993691-2995551 REVERSEhighly similar to ( 578) MDHG\_ORYSA Malate dehydrogenase, glyoxysomal precursor (EC 1.1.1.37) - Oryza sativa (Rice)highly similar to ( 613) loc\_os03g56280 12003.m10537 protein malate dehydrogenase, glyoxysomal precursor, putative, expressed seq=cds; coord=1:282537233..282540873:-1; parent\_gene=GRMZM2G072744'

'moderately similar to ( 390) AT5G09660 | Symbols: PMDH2 | PMDH2 (peroxisomal NAD-malate dehydrogenase 2); malate dehydrogenase | chr5:2993691-2995551 REVERSEmoderately similar to ( 428) MDHG\_ORYSA Malate dehydrogenase, glyoxysomal precursor (EC 1.1.1.37) - Oryza sativa (Rice)moderately similar to ( 428) loc\_os12g43630 12012.m26992 protein malate dehydrogenase, glyoxysomal precursor, putative, expressed seq=cds; coord=3:91357080..91360381:-1; parent\_gene=GRMZM2G077415'

'moderately similar to ( 389) AT3G47520 | Symbols: MDH | MDH (MALATE DEHYDROGENASE); L-malate dehydrogenase/ binding / catalytic/ malate dehydrogenase/ oxidoreductase/ oxidoreductase, acting on the CH-OH group of donors, NAD or NADP as acceptor | chr3:17513657-17514868 FORWARDmoderately similar to ( 322) MDHM\_FRAAN Malate dehydrogenase, mitochondrial precursor (EC 1.1.1.37) - Fragaria ananassa (Strawberry)moderately similar to ( 479) loc\_os07g43700 12007.m29008 protein malate dehydrogenase, glyoxysomal precursor, putative, expressed seq=cds; coord=7:167638521..167640715:-1; parent\_gene=GRMZM2G141289'

'moderately similar to ( 450) AT1G53240 | Symbols: | malate dehydrogenase (NAD), mitochondrial | chr1:19854966-19856802 REVERSEmoderately similar to ( 451) MDHM\_FRAAN Malate dehydrogenase, mitochondrial precursor (EC 1.1.1.37) - Fragaria ananassa (Strawberry)highly similar to ( 509) loc\_os01g46070 12001.m10806 protein malate dehydrogenase, mitochondrial precursor, putative, expressed seq=cds; coord=6:165631098..165635858:-1; parent\_gene=GRMZM2G154595'

'highly similar to ( 520) AT3G47520 | Symbols: MDH | MDH (MALATE DEHYDROGENASE); L-malate dehydrogenase/ binding / catalytic/ malate dehydrogenase/ oxidoreductase/ oxidoreductase, acting on the CH-OH group of donors, NAD or NADP as acceptor | chr3:17513657-17514868 FORWARDmoderately similar to ( 373) MDHG\_ORYSA Malate dehydrogenase, glyoxysomal precursor (EC 1.1.1.37) - Oryza sativa (Rice)highly similar to ( 646) loc\_os08g33720 12008.m07362 protein malate dehydrogenase, mitochondrial precursor, putative, expressed seq=cds; coord=1:213097242..213099953:-1; parent\_gene=GRMZM2G161245'

'highly similar to ( 505) AT1G53240 | Symbols: | malate dehydrogenase (NAD), mitochondrial | chr1:19854966-19856802 REVERSEhighly similar to ( 508) MDHM\_FRAAN Malate dehydrogenase, mitochondrial precursor (EC 1.1.1.37) - Fragaria ananassa (Strawberry)highly similar to ( 587) loc\_os01g46070 12001.m10806 protein malate dehydrogenase, mitochondrial precursor, putative, expressed seq=cds; coord=3:213896741..213905427:1; parent\_gene=GRMZM2G466833'

'moderately similar to ( 500) AT1G18270 | Symbols: | ketose-bisphosphate aldolase class-II family protein | chr1:6283634-6293772 REVERSEhighly similar to ( 773) loc\_os06g14740 12006.m06189 protein ketose-bisphosphate aldolases family protein, expressed seq=cds; coord=6:117850410..117855773:-1; parent\_gene=GRMZM2G074454'

'moderately similar to ( 204) AT3G01850 | Symbols: | ribulose-phosphate 3-epimerase, cytosolic, putative / pentose-5-phosphate 3-epimerase, putative | chr3:300428-301987 REVERSEmoderately similar to ( 231) RPE1\_ORYSA Ribulose-phosphate 3-epimerase, cytoplasmic isoform (EC 5.1.3.1) (Ribulose-5-phosphate-epimerase) (Cyt-RPEase) (RPEcyt) (Pentose-5-phosphate 3-epimerase) (PPE) - Oryza sativa (Rice)moderately similar to ( 231) loc\_os09g32810 12009.m22157 protein ribulose-phosphate 3-epimerase, putative, expressed seq=cds; coord=7:136742676..136746945:1; parent\_gene=GRMZM2G083102'

'moderately similar to ( 240) AT2G01290 | Symbols: | ribose-5-phosphate isomerase | chr2:149192-149989 REVERSEmoderately similar to ( 385) loc\_os04g24140 12004.m07548 protein ribose-5-phosphate isomerase, putative, expressed seq=cds; coord=2:144880257..144881689:1; parent\_gene=GRMZM2G035599'

'moderately similar to ( 214) AT1G71100 | Symbols: RSW10 | RSW10 (RADIAL SWELLING 10); ribose-5-phosphate isomerase | chr1:26814726-26815529 FORWARDmoderately similar to ( 365) loc\_os04g50050 12004.m09937 protein retrotransposon protein, putative, unclassified seq=cds; coord=1:152502918..152508975:1; parent\_gene=GRMZM2G104070'

'highly similar to ( 593) AT1G30510 | Symbols: ATRFNR2 | ATRFNR2 (ROOT FNR 2); FAD binding / NADP or NADPH binding / electron carrier/ ferredoxin-NADP+ reductase/ oxidoreductase | chr1:10807150-10808984 REVERSEhighly similar to ( 677) FENR3\_ORYSA Ferredoxin--NADP reductase, embryo isozyme, chloroplast precursor (EC 1.18.1.2) (FNR) - Oryza sativa (Rice)highly similar to ( 677) loc\_os07g05400 12007.m05004 protein ferredoxin--NADP reductase, embryo isozyme, chloroplast precursor, putative, expressed seq=cds; coord=7:5095194..5100761:-1; parent\_gene=GRMZM2G011858'

'highly similar to ( 607) AT1G30510 | Symbols: ATRFNR2 | ATRFNR2 (ROOT FNR 2); FAD binding / NADP or NADPH binding / electron carrier/ ferredoxin-NADP+ reductase/ oxidoreductase | chr1:10807150-10808984 REVERSEhighly similar to ( 689) FENR2\_ORYSA Ferredoxin--NADP reductase, root isozyme, chloroplast precursor (EC 1.18.1.2) (FNR) - Oryza sativa (Rice)highly similar to ( 689) loc\_os03g57120 12003.m35441 protein ferredoxin--NADP reductase, root isozyme, chloroplast precursor, putative, expressed seq=cds; coord=1:285137082..285140683:-1; parent\_gene=GRMZM2G058760'

'highly similar to ( 582) AT1G24180 | Symbols: IAR4 | IAR4; oxidoreductase, acting on the aldehyde or oxo group of donors, disulfide as acceptor / pyruvate dehydrogenase (acetyl-transferring) | chr1:8560777-8563382 REVERSEhighly similar to ( 582) ODPB\_SOLTU Pyruvate dehydrogenase E1 component subunit alpha, mitochondrial precursor (EC 1.2.4.1) (PDHE1-A) - Solanum tuberosum (Potato)highly similar to ( 672) loc\_os06g13720 12006.m06087 protein pyruvate dehydrogenase E1 component alpha subunit, mitochondrial precursor, putative, expressed seq=cds; coord=9:1443455..1448097:1; parent\_gene=GRMZM2G027627'

'highly similar to ( 624) AT1G01090 | Symbols: PDH-E1 ALPHA | PDH-E1 ALPHA (PYRUVATE DEHYDROGENASE E1 ALPHA); pyruvate dehydrogenase (acetyl-transferring) | chr1:47705-49166 REVERSEmoderately similar to ( 240) ODPB\_SOLTU Pyruvate dehydrogenase E1 component subunit alpha, mitochondrial precursor (EC 1.2.4.1) (PDHE1-A) - Solanum tuberosum (Potato)highly similar to ( 725) loc\_os04g02900 12004.m101452 protein pyruvate dehydrogenase E1 component alpha subunit, putative, expressed seq=cds; coord=2:110896551..110900469:-1; parent\_gene=GRMZM2G033894'

'highly similar to ( 568) AT1G30120 | Symbols: PDH-E1 BETA | PDH-E1 BETA (PYRUVATE DEHYDROGENASE E1 BETA); pyruvate dehydrogenase (acetyl-transferring) | chr1:10584350-10586477 REVERSEmoderately similar to ( 403) ODPB\_MESVI Pyruvate dehydrogenase E1 component subunit beta (EC 1.2.4.1) - Mesostigma viridehighly similar to ( 628) loc\_os12g42230 12012.m08002 protein pyruvate dehydrogenase E1 component subunit beta, putative, expressed seq=cds; coord=1:174313373..174317518:1; parent\_gene=GRMZM2G088565'

'highly similar to ( 602) AT5G50850 | Symbols: MAB1 | MAB1 (MACCI-BOU); catalytic/ pyruvate dehydrogenase (acetyl-transferring) | chr5:20689671-20692976 FORWARDhighly similar to ( 589) ODPB\_PEA Pyruvate dehydrogenase E1 component subunit beta, mitochondrial precursor (EC 1.2.4.1) (PDHE1-B) - Pisum sativum (Garden pea)highly similar to ( 689) loc\_os09g33500 12009.m22013 protein pyruvate dehydrogenase E1 component subunit beta, mitochondrial precursor, putative, expressed seq=cds; coord=2:192576240..192582957:1; parent\_gene=GRMZM2G097226'

'highly similar to ( 569) AT1G30120 | Symbols: PDH-E1 BETA | PDH-E1 BETA (PYRUVATE DEHYDROGENASE E1 BETA); pyruvate dehydrogenase (acetyl-transferring) | chr1:10584350-10586477 REVERSEmoderately similar to ( 418) ODPB\_MESVI Pyruvate dehydrogenase E1 component subunit beta (EC 1.2.4.1) - Mesostigma viridehighly similar to ( 614) loc\_os03g44300 12003.m34899 protein pyruvate dehydrogenase E1 component subunit beta, putative, expressed seq=cds; coord=1:251039008..251041842:-1; parent\_gene=GRMZM2G127546'

'highly similar to ( 625) AT1G59900 | Symbols: AT-E1 ALPHA | AT-E1 ALPHA; oxidoreductase, acting on the aldehyde or oxo group of donors, disulfide as acceptor / pyruvate dehydrogenase (acetyl-transferring) | chr1:22051368-22053660 FORWARDhighly similar to ( 627) ODPB\_SOLTU Pyruvate dehydrogenase E1 component subunit alpha, mitochondrial precursor (EC 1.2.4.1) (PDHE1-A) - Solanum tuberosum (Potato)highly similar to ( 703) loc\_os02g50620 12002.m10096 protein pyruvate dehydrogenase E1 component alpha subunit, mitochondrial precursor, putative, expressed seq=cds; coord=4:182736035..182740799:1; parent\_gene=GRMZM2G361693'

'highly similar to ( 627) AT3G13930 | Symbols: | dihydrolipoamide S-acetyltransferase, putative | chr3:4596240-4600143 FORWARDhighly similar to ( 826) loc\_os07g22720 12007.m06556 protein dihydrolipoalysine-residue acetyltransferase component of pyruvatedehydrogenase complex, mitochondrial precursor, putative, expressed seq=cds; coord=5:155530969..155538363:-1; parent\_gene=GRMZM2G015132'

'moderately similar to ( 418) AT1G34430 | Symbols: EMB3003 | EMB3003 (embryo defective 3003); acyltransferase/ dihydrolipoalysine-residue acetyltransferase/ protein binding | chr1:12588027-12590084 REVERSEhighly similar to ( 592) loc\_os12g08170 12012.m04804 protein dihydrolipoalysine-residue acetyltransferase component of pyruvatedehydrogenase complex, mitochondrial precursor, putative, expressed seq=cds; coord=10:11749519..11756094:-1; parent\_gene=GRMZM2G036534'

'highly similar to ( 530) AT3G25860 | Symbols: LTA2, PLE2 | LTA2; dihydrolipoalysine-residue acetyltransferase | chr3:9460632-9462585 FORWARDhighly similar to ( 620) loc\_os08g33440 12008.m07334 protein dihydrolipoalysine-residue acetyltransferase component of pyruvatedehydrogenase complex, putative, expressed seq=cds; coord=1:214719298..214723588:1; parent\_gene=GRMZM2G058702'



'highly similar to ( 582) AT3G52200 | Symbols: LTA3 | LTA3; ATP binding / dihydrolipoyllysine-residue acetyltransferase | chr3:19360317-19366091 FORWARDhighly similar to ( 805) loc\_os06g30460 12006.m091708 protein dihydrolipoyllysine-residue acetyltransferase component of pyruvatedehydrogenase complex, mitochondrial precursor, putative, expressed seq=cds; coord=1:290265297..290286811:1; parent\_gene=GRMZM2G082664'

'highly similar to ( 522) AT3G25860 | Symbols: LTA2, PLE2 | LTA2; dihydrolipoyllysine-residue acetyltransferase | chr3:9460632-9462585 FORWARDhighly similar to ( 612) loc\_os08g33440 12008.m07334 protein dihydrolipoyllysine-residue acetyltransferase component of pyruvatedehydrogenase complex, putative, expressed seq=cds; coord=4:82008782..82012777:-1; parent\_gene=GRMZM2G117786'

'moderately similar to ( 429) AT3G25860 | Symbols: LTA2, PLE2 | LTA2; dihydrolipoyllysine-residue acetyltransferase | chr3:9460632-9462585 FORWARDmoderately similar to ( 387) loc\_os08g33440 12008.m07334 protein dihydrolipoyllysine-residue acetyltransferase component of pyruvatedehydrogenase complex, putative, expressed seq=cds; coord=7:110057897..110060901:-1; parent\_gene=GRMZM2G121200'

'highly similar to ( 522) AT3G13930 | Symbols: | dihydrolipoamide S-acetyltransferase, putative | chr3:4596240-4600143 FORWARDhighly similar to ( 632) loc\_os07g22720 12007.m06556 protein dihydrolipoyllysine-residue acetyltransferase component of pyruvatedehydrogenase complex, mitochondrial precursor, putative, expressed seq=cds; coord=4:230189571..230193924:-1; parent\_gene=GRMZM2G161969'

'highly similar to ( 527) AT1G34430 | Symbols: EMB3003 | EMB3003 (embryo defective 3003); acyltransferase/ dihydrolipoyllysine-residue acetyltransferase/ protein binding | chr1:12588027-12590084 REVERSEhighly similar to ( 592) loc\_os12g08170 12012.m04804 protein dihydrolipoyllysine-residue acetyltransferase component of pyruvatedehydrogenase complex, mitochondrial precursor, putative, expressed seq=cds; coord=3:139285416..139291670:-1; parent\_gene=GRMZM2G165176'

'highly similar to ( 803) AT3G16950 | Symbols: LPD1, ptlpd1 | LPD1 (LIPOAMIDE DEHYDROGENASE 1); dihydrolipoyl dehydrogenase | chr3:5786508-5790383 REVERSEmoderately similar to ( 235) DLDH\_PEA Dihydrolipoyl dehydrogenase, mitochondrial precursor (EC 1.8.1.4) (Dihydrolipoamide dehydrogenase) (Pyruvate dehydrogenase complex E3 subunit) (PDC-E3) (E3) (Glycine cleavage system L protein) - Pisum sativum (Garden pea)highly similar to ( 917) loc\_os05g06460 12005.m05173 protein dihydrolipoyl dehydrogenase, putative, expressed seq=cds; coord=8:79300397..79307702:1; parent\_gene=GRMZM2G073774'

'highly similar to ( 808) AT3G16950 | Symbols: LPD1, ptlpd1 | LPD1 (LIPOAMIDE DEHYDROGENASE 1); dihydrolipoyl dehydrogenase | chr3:5786508-5790383 REVERSEmoderately similar to ( 238) DLDH\_PEA Dihydrolipoyl dehydrogenase, mitochondrial precursor (EC 1.8.1.4) (Dihydrolipoamide dehydrogenase) (Pyruvate dehydrogenase complex E3 subunit) (PDC-E3) (E3) (Glycine cleavage system L protein) - Pisum sativum (Garden pea)highly similar to ( 893) loc\_os01g23610 12001.m42997 protein dihydrolipoyl dehydrogenase, putative, expressed seq=cds; coord=8:42281387..42289748:-1; parent\_gene=GRMZM2G145595'

'highly similar to ( 803) AT3G16950 | Symbols: LPD1, ptlpd1 | LPD1 (LIPOAMIDE DEHYDROGENASE 1); dihydrolipoyl dehydrogenase | chr3:5786508-5790383 REVERSEmoderately similar to ( 235) DLDH\_PEA Dihydrolipoyl dehydrogenase, mitochondrial precursor (EC 1.8.1.4) (Dihydrolipoamide dehydrogenase) (Pyruvate dehydrogenase complex E3 subunit) (PDC-E3) (E3) (Glycine cleavage system L protein) - Pisum sativum (Garden pea)highly similar to ( 917) loc\_os05g06460 12005.m05173 protein dihydrolipoyl dehydrogenase, putative, expressed seq=cds; coord=8:79203447..79210580:1; parent\_gene=GRMZM2G152958'

'highly similar to ( 769) AT2G44350 | Symbols: ATCS, CSY4 | ATCS; ATP binding / ATP citrate synthase/ citrate (SI)-synthase | chr2:18316673-18320524 FORWARDhighly similar to ( 754) C1SY\_DAUCA Citrate synthase, mitochondrial precursor (EC 2.3.3.1) - Daucus carota (Carrot)highly similar to ( 870) loc\_os11g33240 12011.m080018 protein citrate synthase 4, mitochondrial precursor, putative, expressed seq=cds; coord=5:123629674..123636311:1; parent\_gene=GRMZM2G063851'

'highly similar to ( 774) AT2G44350 | Symbols: ATCS, CSY4 | ATCS; ATP binding / ATP citrate synthase/ citrate (SI)-synthase | chr2:18316673-18320524 FORWARDhighly similar to ( 754) CICY\_DAUCA Citrate synthase, mitochondrial precursor (EC 2.3.3.1) - Daucus carota (Carrot)highly similar to ( 879) loc\_os11g33240 12011.m080018 protein citrate synthase 4, mitochondrial precursor, putative, expressed seq=cds; coord=4:233821047..233828196:1; parent\_gene=GRMZM2G064023'

'nearly identical (1164) AT2G05710 | Symbols: | aconitate hydratase, cytoplasmic, putative / citrate hydro-lyase/aconitase, putative | chr2:2141591-2146350 FORWARDnearly identical (1180) ACOC\_ORYSA Putative aconitate hydratase, cytoplasmic (EC 4.2.1.3) (Citrate hydro-lyase) (Aconitase) - Oryza sativa (Rice)nearly identical (1290) loc\_os03g04410 12003.m05971 protein aconitate hydratase, cytoplasmic, putative, expressed seq=cds; coord=9:151763726..151772001:-1; parent\_gene=GRMZM2G009808'

'highly similar to ( 798) AT4G13430 | Symbols: IIL1 | IIL1 (ISOPROPYL MALATE ISOMERASE LARGE SUBUNIT 1); 4 iron, 4 sulfur cluster binding / hydro-lyase/ lyase | chr4:7804194-7807789 REVERSEvery weakly similar to (81.6) ACOC\_CUCMA Aconitate hydratase, cytoplasmic (EC 4.2.1.3) (Citrate hydro-lyase) (Aconitase) - Cucurbita maxima (Pumpkin) (Winter squash)highly similar to ( 891) loc\_os02g03260 12002.m33530 protein 3-isopropylmalate dehydratase large subunit 2, putative, expressed seq=cds; coord=4:238877216..238881188:1; parent\_gene=GRMZM2G010044'

'nearly identical (1422) AT2G05710 | Symbols: | aconitate hydratase, cytoplasmic, putative / citrate hydro-lyase/aconitase, putative | chr2:2141591-2146350 FORWARDnearly identical (1497) ACOC\_ORYSA Putative aconitate hydratase, cytoplasmic (EC 4.2.1.3) (Citrate hydro-lyase) (Aconitase) - Oryza sativa (Rice)nearly identical (1497) loc\_os08g09200 12008.m05055 protein aconitate hydratase, cytoplasmic, putative, expressed seq=cds; coord=4:28118892..28124783:1; parent\_gene=GRMZM2G020801'

'nearly identical (1168) AT2G05710 | Symbols: | aconitate hydratase, cytoplasmic, putative / citrate hydro-lyase/aconitase, putative | chr2:2141591-2146350 FORWARDnearly identical (1189) ACOC\_ORYSA Putative aconitate hydratase, cytoplasmic (EC 4.2.1.3) (Citrate hydro-lyase) (Aconitase) - Oryza sativa (Rice)nearly identical (1297) loc\_os03g04410 12003.m05971 protein aconitate hydratase, cytoplasmic, putative, expressed seq=cds; coord=1:8135964..8147853:-1; parent\_gene=GRMZM2G176397'

'weakly similar to ( 192) AT4G26970 | Symbols: | aconitate hydratase/ copper ion binding | chr4:13543077-13548427 FORWARDmoderately similar to ( 201) ACOC\_ORYSA Putative aconitate hydratase, cytoplasmic (EC 4.2.1.3) (Citrate hydro-lyase) (Aconitase) - Oryza sativa (Rice)moderately similar to ( 201) loc\_os08g09200 12008.m05055 protein aconitate hydratase, cytoplasmic, putative, expressed seq=cds; coord=5:91434867..91439005:-1; parent\_gene=GRMZM2G364988'

'nearly identical (1378) AT2G05710 | Symbols: | aconitate hydratase, cytoplasmic, putative / citrate hydro-lyase/aconitase, putative | chr2:2141591-2146350 FORWARDnearly identical (1446) ACOC\_ORYSA Putative aconitate hydratase, cytoplasmic (EC 4.2.1.3) (Citrate hydro-lyase) (Aconitase) - Oryza sativa (Rice)nearly identical (1447) loc\_os08g09200 12008.m05055 protein aconitate hydratase, cytoplasmic, putative, expressed seq=cds; coord=2:114883820..114891121:-1; parent\_gene=GRMZM2G467338'

'highly similar to ( 577) AT4G35260 | Symbols: IDH1 | IDH1 (ISOCITRATE DEHYDROGENASE 1); isocitrate dehydrogenase (NAD+)/ oxidoreductase, acting on the CH-OH group of donors, NAD or NADP as acceptor | chr4:16774494-16776233 REVERSEmoderately similar to ( 279) LEU3\_SOLTU 3-isopropylmalate dehydrogenase, chloroplast precursor (EC 1.1.1.85) (Beta-IPM dehydrogenase) (IMDH) (3-IPM-DH) - Solanum tuberosum (Potato)highly similar to ( 627) loc\_os02g38200 12002.m08908 protein isocitrate dehydrogenase subunit 1, mitochondrial precursor, putative, expressed seq=cds; coord=10:125331184..125335073:-1; parent\_gene=GRMZM2G025366'

'moderately similar to ( 266) AT4G35260 | Symbols: IDH1 | IDH1 (ISOCITRATE DEHYDROGENASE 1); isocitrate dehydrogenase (NAD+)/ oxidoreductase, acting on the CH-OH group of donors, NAD or NADP as acceptor | chr4:16774494-16776233 REVERSEweakly similar to ( 144) LEU3\_SOLTU 3-isopropylmalate dehydrogenase, chloroplast precursor (EC 1.1.1.85) (Beta-IPM dehydrogenase) (IMDH) (3-IPM-DH) - Solanum tuberosum (Potato)moderately similar to ( 297) loc\_os02g38200 12002.m08908 protein isocitrate dehydrogenase subunit 1, mitochondrial precursor, putative, expressed seq=cds; coord=5:180550035..180550796:1; parent\_gene=GRMZM2G116872'

'nearly identical (1729) AT5G65750 | Symbols: | 2-oxoglutarate dehydrogenase E1 component, putative / oxoglutarate decarboxylase, putative / alpha-ketoglutaric dehydrogenase, putative | chr5:26304212-26307947 FORWARDnearly identical (1779) loc\_os04g32020 12004.m101710 protein 2-oxoglutarate dehydrogenase E1 component, mitochondrial precursor, putative, expressed seq=cds; coord=2:69290220..69296784:-1; parent\_gene=GRMZM2G142863'

'nearly identical (1732) AT5G65750 | Symbols: | 2-oxoglutarate dehydrogenase E1 component, putative / oxoglutarate decarboxylase, putative / alpha-ketoglutaric dehydrogenase, putative | chr5:26304212-26307947 FORWARDnearly identical (1779) loc\_os04g32020 12004.m101710 protein 2-oxoglutarate dehydrogenase E1 component, mitochondrial precursor, putative, expressed seq=cds; coord=10:109798193..109804126:1; parent\_gene=GRMZM2G151041'

'very weakly similar to (94.4) AT3G55410 | Symbols: | 2-oxoglutarate dehydrogenase E1 component, putative / oxoglutarate decarboxylase, putative / alpha-ketoglutaric dehydrogenase, putative | chr3:20541897-20545728 FORWARDweakly similar to ( 102) loc\_os04g32020 12004.m101710 protein 2-oxoglutarate dehydrogenase E1 component, mitochondrial precursor, putative, expressed seq=cds; coord=7:160015814..160022084:-1; parent\_gene=AC194977.2\_FG004'

'moderately similar to ( 491) AT5G23250 | Symbols: | succinyl-CoA ligase (GDP-forming) alpha-chain, mitochondrial, putative / succinyl-CoA synthetase, alpha chain, putative / SCS-alpha, putative | chr5:7830460-7832265 FORWARDhighly similar to ( 563) SUCA\_ORYSA Probable succinyl-CoA ligase [GDP-forming] subunit alpha, mitochondrial precursor (EC 6.2.1.4) (Succinyl-CoA synthetase subunit alpha) (SCS-alpha) - Oryza sativa (Rice)highly similar to ( 563) loc\_os07g38970 12007.m08141 protein succinyl-CoA ligase alpha-chain 2, mitochondrial precursor, putative, expressed seq=cds; coord=2:207032350..207038547:1; parent\_gene=GRMZM2G039251'

'highly similar to ( 638) AT2G20420 | Symbols: | succinyl-CoA ligase (GDP-forming) beta-chain, mitochondrial, putative / succinyl-CoA synthetase, beta chain, putative / SCS-beta, putative | chr2:8805574-8807858 FORWARDhighly similar to ( 696) SUCB\_ORYSA Succinyl-CoA ligase [GDP-forming] beta-chain, mitochondrial precursor (EC 6.2.1.4) (Succinyl-CoA synthetase, beta chain) (SCS-beta) - Oryza sativa (Rice)highly similar to ( 696) loc\_os02g40830 12002.m100283 protein succinyl-CoA ligase beta-chain, mitochondrial precursor, putative, expressed seq=cds; coord=5:186081955..186094328:1; parent\_gene=GRMZM2G064695'

'highly similar to ( 511) AT5G23250 | Symbols: | succinyl-CoA ligase (GDP-forming) alpha-chain, mitochondrial, putative / succinyl-CoA synthetase, alpha chain, putative / SCS-alpha, putative | chr5:7830460-7832265 FORWARDhighly similar to ( 551) SUCA\_ORYSA Probable succinyl-CoA ligase [GDP-forming] subunit alpha, mitochondrial precursor (EC 6.2.1.4) (Succinyl-CoA synthetase subunit alpha) (SCS-alpha) - Oryza sativa (Rice)highly similar to ( 551) loc\_os07g38970 12007.m08141 protein succinyl-CoA ligase alpha-chain 2, mitochondrial precursor, putative, expressed seq=cds; coord=7:160283320..160289262:1; parent\_gene=GRMZM2G072054'

'nearly identical (1080) AT5G66760 | Symbols: SDH1-1 | SDH1-1; ATP binding / succinate dehydrogenase | chr5:26653776-26657224 FORWARDnearly identical (1108) DHSA\_ORYSA Succinate dehydrogenase [ubiquinone] flavoprotein subunit, mitochondrial precursor (EC 1.3.5.1) (FP) (Flavoprotein subunit of complex II) - Oryza sativa (Rice)nearly identical (1108) loc\_os07g04240 12007.m04893 protein succinate dehydrogenase flavoprotein subunit, mitochondrial precursor, putative, expressed seq=cds; coord=7:4234486..4239316:1; parent\_gene=GRMZM2G064799'

'nearly identical (1081) AT5G66760 | Symbols: SDH1-1 | SDH1-1; ATP binding / succinate dehydrogenase | chr5:26653776-26657224 FORWARDnearly identical (1104) DHSA\_ORYSA Succinate dehydrogenase [ubiquinone] flavoprotein subunit, mitochondrial precursor (EC 1.3.5.1) (FP) (Flavoprotein subunit of complex II) - Oryza sativa (Rice)nearly identical (1104) loc\_os07g04240 12007.m04893 protein succinate dehydrogenase flavoprotein subunit, mitochondrial precursor, putative, expressed seq=cds; coord=2:236245150..236250456:-1; parent\_gene=GRMZM2G079888'

'highly similar to ( 800) AT2G47510 | Symbols: FUM1 | FUM1 (FUMARASE 1); catalytic/ fumarate hydratase | chr2:19498614-19502020 FORWARDhighly similar to ( 860) loc\_os03g21950 12003.m07599 protein fumarate hydratase 1, mitochondrial precursor, putative, expressed seq=cds; coord=1:56746484..56752553:1; parent\_gene=GRMZM2G010823'

'weakly similar to ( 165) AT2G47510 | Symbols: FUM1 | FUM1 (FUMARASE 1); catalytic/ fumarate hydratase | chr2:19498614-19502020 FORWARDweakly similar to ( 172) loc\_os03g21950 12003.m07599 protein fumarate hydratase 1, mitochondrial precursor, putative, expressed seq=cds; coord=4:4100301..4104478:1; parent\_gene=GRMZM2G348729'

'highly similar to ( 773) AT3G06650 | Symbols: ACLB-1 | ACLB-1; ATP citrate synthase | chr3:2079247-2082633 REVERSEhighly similar to ( 799) loc\_os01g19450 12001.m42644 protein ATP-citrate synthase subunit 1, putative, expressed seq=cds; coord=8:37409326..37412866:1; parent\_gene=GRMZM2G002416'

'highly similar to ( 604) AT5G03290 | Symbols: | isocitrate dehydrogenase, putative / NAD+ isocitrate dehydrogenase, putative | chr5:794043-795939 FORWARDhighly similar to ( 576) LEU3\_SOLTU 3-isopropylmalate dehydrogenase, chloroplast precursor (EC 1.1.1.85) (Beta-IPM dehydrogenase) (IMDH) (3-IPM-DH) - Solanum tuberosum (Potato)highly similar to ( 694) loc\_os01g16900 12001.m150554 protein 3-isopropylmalate dehydrogenase, chloroplast precursor, putative, expressed seq=cds; coord=3:43991720..43996960:1; parent\_gene=GRMZM2G018566'

'highly similar to ( 605) AT5G03290 | Symbols: | isocitrate dehydrogenase, putative / NAD+ isocitrate dehydrogenase, putative | chr5:794043-795939 FORWARDhighly similar to ( 572) LEU3\_SOLTU 3-isopropylmalate dehydrogenase, chloroplast precursor (EC 1.1.1.85) (Beta-IPM dehydrogenase) (IMDH) (3-IPM-DH) - Solanum tuberosum (Potato)highly similar to ( 695) loc\_os01g16900 12001.m150554 protein 3-isopropylmalate dehydrogenase, chloroplast precursor, putative, expressed seq=cds; coord=8:2312133..2319735:-1; parent\_gene=GRMZM2G120857'

'moderately similar to ( 232) AT5G03290 | Symbols: | isocitrate dehydrogenase, putative / NAD+ isocitrate dehydrogenase, putative | chr5:794043-795939 FORWARDmoderately similar to ( 232) LEU3\_SOLTU 3-isopropylmalate dehydrogenase, chloroplast precursor (EC 1.1.1.85) (Beta-IPM dehydrogenase) (IMDH) (3-IPM-DH) - Solanum tuberosum (Potato)moderately similar to ( 264) loc\_os01g16900 12001.m150554 protein 3-isopropylmalate dehydrogenase, chloroplast precursor, putative, expressed seq=cds; coord=1:44528827..44529892:1; parent\_gene=GRMZM2G173251'

'highly similar to ( 564) AT5G03290 | Symbols: | isocitrate dehydrogenase, putative / NAD+ isocitrate dehydrogenase, putative | chr5:794043-795939 FORWARDhighly similar to ( 535) LEU3\_SOLTU 3-isopropylmalate dehydrogenase, chloroplast precursor (EC 1.1.1.85) (Beta-IPM dehydrogenase) (IMDH) (3-IPM-DH) - Solanum tuberosum (Potato)highly similar to ( 610) loc\_os01g16900 12001.m150554 protein 3-isopropylmalate dehydrogenase, chloroplast precursor, putative, expressed seq=cds; coord=9:11319200..11323395:-1; parent\_gene=GRMZM2G404855'

'moderately similar to ( 468) AT5G43330 | Symbols: | malate dehydrogenase, cytosolic, putative | chr5:17390552-17392449 FORWARDmoderately similar to ( 479) MDHC\_ORYSA Malate dehydrogenase, cytoplasmic (EC 1.1.1.37) (PP37) - Oryza sativa (Rice)highly similar to ( 580) loc\_os04g46560 12004.m09605 protein malate dehydrogenase, cytoplasmic, putative, expressed seq=cds; coord=2:19914845..19916501:1; parent\_gene=GRMZM2G101290'

'highly similar to ( 625) AT5G58330 | Symbols: | malate dehydrogenase (NADP), chloroplast, putative | chr5:23580010-23582287 REVERSEhighly similar to ( 791) MDHP\_MAIZE Malate dehydrogenase [NADP], chloroplast precursor (EC 1.1.1.82) (NADP-MDH) - Zea mays (Maize)highly similar to ( 697) loc\_os08g44810 12008.m08453 protein malate dehydrogenase 1, chloroplast precursor, putative, expressed seq=cds; coord=1:203170067..203174226:-1; parent\_gene=GRMZM2G129513'

'moderately similar to ( 476) AT5G43330 | Symbols: | malate dehydrogenase, cytosolic, putative | chr5:17390552-17392449 FORWARDhighly similar to ( 502) MDHC\_MAIZE Malate dehydrogenase, cytoplasmic (EC 1.1.1.37) - Zea mays (Maize)moderately similar to ( 480) loc\_os10g33800 12010.m21921 protein malate dehydrogenase, cytoplasmic, putative, expressed seq=cds; coord=1:231336185..231341950:-1; parent\_gene=GRMZM2G415359'

'highly similar to ( 604) AT5G08740 | Symbols: NDC1 | NDC1 (NAD(P)H dehydrogenase C1); NADH dehydrogenase | chr5:2848752-2851323 REVERSEhighly similar to ( 906) loc\_os06g11140 12006.m05831 protein NADH dehydrogenase, putative, expressed seq=cds; coord=9:7619341..7624742:-1; parent\_gene=GRMZM2G080044'

'highly similar to ( 670) AT1G74910 | Symbols: | ADP-glucose pyrophosphorylase family protein | chr1:28135770-28138456 REVERSEhighly similar to ( 776) loc\_os03g11050 12003.m35086 protein mannose-1-phosphate guanyltransferase, putative, expressed seq=cds; coord=9:147486941..147492124:1; parent\_gene=GRMZM2G178254'

'highly similar to ( 908) AT5G52560 | Symbols: ATUSP | ATUSP (ARABIDOPSIS THALIANA UDP-SUGAR PYROPHOSPHORYLASE); UTP-monosaccharide-1-phosphate uridylyltransferase/ UTP:arabinose-1-phosphate uridylyltransferase/ UTP:galactose-1-phosphate uridylyltransferase/ UTP:glucose 1-phosphate uridylyltransferase/ UTP:xy | chr5:21331230-21334573 FORWARDnearly identical (1054) loc\_os06g48760 12006.m091778 protein UDP-sugar pyrophosphorylase, putative, expressed seq=cds; coord=5:56782827..56794221:-1; parent\_gene=GRMZM2G116586'

'highly similar to ( 934) AT5G52560 | Symbols: ATUSP | ATUSP (ARABIDOPSIS THALIANA UDP-SUGAR PYROPHOSPHORYLASE); UTP-monosaccharide-1-phosphate uridylyltransferase/ UTP:arabinose-1-phosphate uridylyltransferase/ UTP:galactose-1-phosphate uridylyltransferase/ UTP:glucose 1-phosphate uridylyltransferase/ UTP:xy | chr5:21331230-21334573 FORWARDnearly identical (1090) loc\_os06g48760 12006.m091778 protein UDP-sugar pyrophosphorylase, putative, expressed seq=cds; coord=6:86773351..86783757:1; parent\_gene=GRMZM2G161493'

'moderately similar to ( 353) AT5G52560 | Symbols: ATUSP | ATUSP (ARABIDOPSIS THALIANA UDP-SUGAR PYROPHOSPHORYLASE); UTP-monosaccharide-1-phosphate uridylyltransferase/ UTP:arabinose-1-phosphate uridylyltransferase/ UTP:galactose-1-phosphate uridylyltransferase/ UTP:glucose 1-phosphate uridylyltransferase/ UTP:xy | chr5:21331230-21334573 FORWARDmoderately similar to ( 419) loc\_os06g48760 12006.m091778 protein UDP-sugar pyrophosphorylase, putative, expressed seq=cds; coord=5:9753858..9757669:1; parent\_gene=GRMZM2G396565'

'weakly similar to ( 198) AT3G02230 | Symbols: RGP1, ATRGP1 | RGP1 (REVERSIBLY GLYCOSYLATED POLYPEPTIDE 1); cellulose synthase (UDP-forming) | chr3:415463-417304 FORWARDweakly similar to ( 200) UPTG\_MAIZE Alpha-1,4-glucan-protein synthase [UDP-forming] (EC 2.4.1.112) (UDP-glucose:protein transglucosylase) (UPTG) (Amylogenin) (Golgi-associated protein se-wap41) - Zea mays (Maize)moderately similar to ( 201) loc\_os07g41360 12007.m08372 protein alpha-1,4-glucan-protein synthase 1, putative, expressed seq=cds; coord=5:214137019..214142243:-1; parent\_gene=GRMZM2G481027'

'highly similar to ( 836) AT5G20950 | Symbols: | glycosyl hydrolase family 3 protein | chr5:7107609-7110775 REVERSEnearly identical (1031) loc\_os01g56510 12001.m43214 protein periplasmic beta-glucosidase precursor, putative, expressed seq=cds; coord=3:192774502..192779708:-1; parent\_gene=AC197578.4\_FG001'

'highly similar to ( 574) AT4G23820 | Symbols: | glycoside hydrolase family 28 protein / polygalacturonase (pectinase) family protein | chr4:12397217-12400050 REVERSEvery weakly similar to (96.3) PGLR\_ACTCH Polygalacturonase precursor (EC 3.2.1.15) (PG) (Pectinase) - Actinidia chinensis (Kiwi) (Yangtao)highly similar to ( 762) loc\_os01g43160 12001.m10579 protein polygalacturonase, putative, expressed seq=cds; coord=8:144537174..144540536:1; parent\_gene=GRMZM2G052844'

'moderately similar to ( 440) AT5G49180 | Symbols: | pectinesterase family protein | chr5:19940783-19942876 REVERSEmoderately similar to ( 397) PME1\_CITSI Pectinesterase-1 precursor (EC 3.1.1.11) (Pectin methylesterase) (PE) - Citrus sinensis (Sweet orange)highly similar to ( 952) loc\_os04g38560 12004.m08845 protein pectinesterase-1 precursor, putative, expressed seq=cds; coord=2:42363164..42365278:1; parent\_gene=GRMZM2G012328'

'moderately similar to ( 460) AT3G05620 | Symbols: | pectinesterase family protein | chr3:1629658-1631766 REVERSEmoderately similar to ( 426) PME\_PRUPE Pectinesterase PPE8B precursor (EC 3.1.1.11) (Pectin methylesterase) (PE) - Prunus persica (Peach)highly similar to ( 779) loc\_os01g15039 12001.m08104 protein pectinesterase PPE8B precursor, putative, expressed seq=cds; coord=8:5329655..5332095:1; parent\_gene=GRMZM2G017555'

'moderately similar to ( 438) AT5G49180 | Symbols: | pectinesterase family protein | chr5:19940783-19942876 REVERSEmoderately similar to ( 404) PME1\_CITSI Pectinesterase-1 precursor (EC 3.1.1.11) (Pectin methylesterase) (PE) - Citrus sinensis (Sweet orange)highly similar to ( 942) loc\_os04g38560 12004.m08845 protein pectinesterase-1 precursor, putative, expressed seq=cds; coord=10:122230413..122232602:-1; parent\_gene=GRMZM2G125356'

'moderately similar to ( 445) AT5G04420 | Symbols: | kelch repeat-containing protein | chr5:1246867-1249455 REVERSEvery weakly similar to (82.4) DYHA\_CHLRE Dynein alpha chain, flagellar outer arm (DHC alpha) - Chlamydomonas reinhardtiihighly similar to ( 813) loc\_os02g57690 12002.m100418 protein acyl-CoA binding protein, putative, expressed seq=cds; coord=4:170221855..170228873:1; parent\_gene=GRMZM2G085547'

'moderately similar to ( 345) AT1G24360 | Symbols: | 3-oxoacyl-(acyl-carrier protein) reductase, chloroplast / 3-ketoacyl-acyl carrier protein reductase | chr1:8640820-8643283 FORWARDmoderately similar to ( 370) FABG3\_BRANA 3-oxoacyl-[acyl-carrier-protein] reductase 3, chloroplast precursor (EC 1.1.1.100) (3-ketoacyl-acyl carrier protein reductase 3) - Brassica napus (Rape)moderately similar to ( 412) loc\_os04g30760 12004.m08180 protein 3-oxoacyl-reductase, chloroplast precursor, putative, expressed seq=cds; coord=5:163113974..163119442:-1; parent\_gene=GRMZM2G043602'

'moderately similar to ( 374) AT1G24360 | Symbols: | 3-oxoacyl-(acyl-carrier protein) reductase, chloroplast / 3-ketoacyl-acyl carrier protein reductase | chr1:8640820-8643283 FORWARDmoderately similar to ( 397) FABG3\_BRANA 3-oxoacyl-[acyl-carrier-protein] reductase 3, chloroplast precursor (EC 1.1.1.100) (3-ketoacyl-acyl carrier protein reductase 3) - Brassica napus (Rape)moderately similar to ( 476) loc\_os04g30760 12004.m08180 protein 3-oxoacyl-reductase, chloroplast precursor, putative, expressed seq=cds; coord=10:108122298..108130104:1; parent\_gene=GRMZM2G099696'

'very weakly similar to (96.3) AT1G24360 | Symbols: | 3-oxoacyl-(acyl-carrier protein) reductase, chloroplast / 3-ketoacyl-acyl carrier protein reductase | chr1:8640820-8643283 FORWARDvery weakly similar to ( 100) FABG3\_BRANA 3-oxoacyl-[acyl-carrier-protein] reductase 3, chloroplast precursor (EC 1.1.1.100) (3-ketoacyl-acyl carrier protein reductase 3) - Brassica napus (Rape)weakly similar to ( 127) loc\_os12g13930 12012.m05365 protein 3-oxoacyl-reductase, chloroplast precursor, putative, expressed seq=cds; coord=9:96194999..96198016:1; parent\_gene=GRMZM2G141256'

'moderately similar to ( 310) AT1G24360 | Symbols: | 3-oxoacyl-(acyl-carrier protein) reductase, chloroplast / 3-ketoacyl-acyl carrier protein reductase | chr1:8640820-8643283 FORWARDmoderately similar to ( 327) FABG3\_BRANA 3-oxoacyl-[acyl-carrier-protein] reductase 3, chloroplast precursor (EC 1.1.1.100) (3-ketoacyl-acyl carrier protein reductase 3) - Brassica napus (Rape)moderately similar to ( 371) loc\_os04g30760 12004.m08180 protein 3-oxoacyl-reductase, chloroplast precursor, putative, expressed seq=cds; coord=2:76554803..76576439:1; parent\_gene=GRMZM2G351023'

'highly similar to ( 853) AT3G16910 | Symbols: AAE7, ACN1 | AAE7 (ACYL-ACTIVATING ENZYME 7); AMP binding / acetate-CoA ligase | chr3:5773231-5775411 REVERSEweakly similar to ( 139) 4CL1\_SOLTU 4-coumarate--CoA ligase 1 (EC 6.2.1.12) (4CL 1) (4-coumaroyl-CoA synthase 1) - Solanum tuberosum (Potato)nearly identical (1050) loc\_os03g19240 12003.m07341 protein AMP-binding protein, putative, expressed seq=cds; coord=1:48684987..48690042:-1; parent\_gene=GRMZM2G013783'

'nearly identical (1177) AT1G77760 | Symbols: NIA1, GNR1, NR1 | NIA1 (NITRATE REDUCTASE 1); nitrate reductase | chr1:29236005-29239367 REVERSEnearly identical (1486) NIA1\_ORYSA Nitrate reductase [NADH] 1 (EC 1.7.1.1) (NR1) - Oryza sativa (Rice)nearly identical (1486) loc\_os08g36480 12008.m07637 protein nitrate reductase 1, putative, expressed seq=cds; coord=1:198738739..198743220:-1; parent\_gene=GRMZM2G076723'

'nearly identical (1232) AT1G77760 | Symbols: NIA1, GNR1, NR1 | NIA1 (NITRATE REDUCTASE 1); nitrate reductase | chr1:29236005-29239367 REVERSEnearly identical (1540) NIA7\_HORVU Nitrate reductase [NAD(P)H] (EC 1.7.1.2) - Hordeum vulgare (Barley)nearly identical (1573) loc\_os02g53130 12002.m10342 protein nitrate reductase, putative, expressed seq=cds; coord=4:177655913..177659763:1; parent\_gene=GRMZM2G428027'

'highly similar to ( 879) AT2G15620 | Symbols: NIR1, NIR, ATHNIR | NIR1 (NITRITE REDUCTASE 1); ferredoxin-nitrate reductase/ nitrite reductase (NO-forming) | chr2:6810552-6812666 FORWARDnearly identical (1118) NIR\_MAIZE Ferredoxin--nitrite reductase, chloroplast precursor (EC 1.7.7.1) (Fragment) - Zea mays (Maize)highly similar to ( 990) loc\_os01g25484 12001.m43466 protein ferredoxin--nitrite reductase, chloroplast precursor, putative, expressed seq=cds; coord=4:178582233..178585788:1; parent\_gene=GRMZM2G079381'

'highly similar to ( 862) AT2G15620 | Symbols: NIR1, NIR, ATHNIR | NIR1 (NITRITE REDUCTASE 1); ferredoxin-nitrate reductase/ nitrite reductase (NO-forming) | chr2:6810552-6812666 FORWARDnearly identical (1051) NIR\_MAIZE Ferredoxin--nitrite reductase, chloroplast precursor (EC 1.7.7.1) (Fragment) - Zea mays (Maize)highly similar to ( 974) loc\_os01g25484 12001.m43466 protein ferredoxin--nitrite reductase, chloroplast precursor, putative, expressed seq=cds; coord=5:209907074..209909988:-1; parent\_gene=GRMZM2G102959'

'nearly identical (2554) AT5G04140 | Symbols: GLU1, GLS1, GLUS, FD-GOGAT | GLU1 (GLUTAMATE SYNTHASE 1); glutamate synthase (ferredoxin) | chr5:1130031-1138186 FORWARDnearly identical (3008) GLTB\_MAIZE Ferredoxin-dependent glutamate synthase, chloroplast precursor (EC 1.4.7.1) (Fd-GOGAT) - Zea mays (Maize)nearly identical (2839) loc\_os07g46460 12007.m08863 protein ferredoxin-dependent glutamate synthase, chloroplast precursor, putative, expressed seq=cds; coord=7:170961145..170979959:-1; parent\_gene=GRMZM2G036609'

'nearly identical (3256) AT5G53460 | Symbols: GLT1 | GLT1; glutamate synthase (NADH) | chr5:21700518-21709629 FORWARDnearly identical (3224) GLSN\_MEDSA Glutamate synthase [NADH], chloroplast precursor (EC 1.4.1.14) (NADH-GOGAT) - Medicago sativa (Alfalfa)nearly identical (3818) loc\_os01g48960 12001.m11085 protein glutamate synthase, chloroplast precursor, putative, expressed seq=cds; coord=8:151204529..151215672:-1; parent\_gene=GRMZM2G077054'

'nearly identical (3241) AT5G53460 | Symbols: GLT1 | GLT1; glutamate synthase (NADH) | chr5:21700518-21709629 FORWARDnearly identical (3202) GLSN\_MEDSA Glutamate synthase [NADH], chloroplast precursor (EC 1.4.1.14) (NADH-GOGAT) - Medicago sativa (Alfalfa)nearly identical (3767) loc\_os01g48960 12001.m11085 protein glutamate synthase, chloroplast precursor, putative, expressed seq=cds; coord=3:208332821..208344531:1; parent\_gene=GRMZM2G085078'

'nearly identical (3078) AT5G53460 | Symbols: GLT1 | GLT1; glutamate synthase (NADH) | chr5:21700518-21709629 FORWARDnearly identical (3057) GLSN\_MEDSA Glutamate synthase [NADH], chloroplast precursor (EC 1.4.1.14) (NADH-GOGAT) - Medicago sativa (Alfalfa)nearly identical (3311) loc\_os01g48960 12001.m11085 protein glutamate synthase, chloroplast precursor, putative, expressed seq=cds; coord=6:163217461..163229234:1; parent\_gene=GRMZM2G375064'

'highly similar to ( 609) AT5G37600 | Symbols: ATGSR1, GLN1;1, GSR 1 | ATGSR1; copper ion binding / glutamate-ammonia ligase | chr5:14933574-14935656 REVERSEhighly similar to ( 702) GLNA2\_MAIZE Glutamine synthetase root isozyme 2 (EC 6.3.1.2) (Glutamate--ammonia ligase) - Zea mays (Maize)highly similar to ( 635) loc\_os03g50490 12003.m10040 protein glutamine synthetase root isozyme 2, putative, expressed seq=cds; coord=1:267894143..267897525:-1; parent\_gene=GRMZM2G024104'

'highly similar to ( 676) AT5G37600 | Symbols: ATGSR1, GLN1;1, GSR 1 | ATGSR1; copper ion binding / glutamate-ammonia ligase | chr5:14933574-14935656 REVERSEhighly similar to ( 733) GLNA3\_MAIZE Glutamine synthetase root isozyme 3 (EC 6.3.1.2) (Glutamate--ammonia ligase) (GS112) - Zea mays (Maize)highly similar to ( 714) loc\_os02g50240 12002.m33860 protein glutamine synthetase root isozyme 3, putative, expressed seq=cds; coord=4:167081372..167084703:-1; parent\_gene=GRMZM2G036464'

'highly similar to ( 501) AT5G37600 | Symbols: ATGSR1, GLN1;1, GSR 1 | ATGSR1; copper ion binding / glutamate-ammonia ligase | chr5:14933574-14935656 REVERSEhighly similar to ( 571) GLNA5\_MAIZE Glutamine synthetase root isozyme 5 (EC 6.3.1.2) (Glutamate--ammonia ligase) (GS117) - Zea mays (Maize)highly similar to ( 528) loc\_os03g12290 12003.m06679 protein glutamine synthetase root isozyme 5, putative, expressed seq=cds; coord=9:146062602..146070481:1; parent\_gene=GRMZM2G046601'

'highly similar to ( 631) AT5G37600 | Symbols: ATGSR1, GLN1;1, GSR 1 | ATGSR1; copper ion binding / glutamate-ammonia ligase | chr5:14933574-14935656 REVERSEhighly similar to ( 704) GLNA1\_MAIZE Glutamine synthetase root isozyme 1 (EC 6.3.1.2) (Glutamate--ammonia ligase) (GS122) - Zea mays (Maize)highly similar to ( 654) loc\_os03g12290 12003.m06679 protein glutamine synthetase root isozyme 5, putative, expressed seq=cds; coord=1:27977783..27980656:-1; parent\_gene=GRMZM2G050514'

'highly similar to ( 677) AT5G35630 | Symbols: GS2, GLN2, ATGSL1 | GS2 (GLUTAMINE SYNTHETASE 2); glutamate-ammonia ligase | chr5:13831220-13833239 FORWARDhighly similar to ( 827) GLNAC\_MAIZE Glutamine synthetase, chloroplast precursor (EC 6.3.1.2) (Glutamate--ammonia ligase) (GS2) - Zea mays (Maize)highly similar to ( 755) loc\_os04g56400 12004.m79000 protein glutamine synthetase, chloroplast precursor, putative, expressed seq=cds; coord=10:146465614..146471079:-1; parent\_gene=GRMZM2G098290'

'nearly identical (1029) AT3G53180 | Symbols: | catalytic/ glutamate-ammonia ligase | chr3:19707068-19711188 FORWARDnearly identical (1409) loc\_os10g31820 12010.m06033 protein protein fluG, putative, expressed seq=cds; coord=1:235645071..235668787:-1; parent\_gene=GRMZM2G115646'

'highly similar to ( 728) AT5G18170 | Symbols: GDH1 | GDH1 (GLUTAMATE DEHYDROGENASE 1); ATP binding / glutamate dehydrogenase [NAD(P)+]/ oxidoreductase | chr5:6006172-6008248 FORWARDhighly similar to ( 820) DHE3\_MAIZE Glutamate dehydrogenase (EC 1.4.1.3) (GDH) - Zea mays (Maize)highly similar to ( 794) loc\_os03g58040 12003.m35454 protein glutamate dehydrogenase, putative, expressed seq=cds; coord=1:287289676..287296815:-1; parent\_gene=GRMZM2G178415'

'highly similar to ( 702) AT5G07440 | Symbols: GDH2 | GDH2 (GLUTAMATE DEHYDROGENASE 2); ATP binding / glutamate dehydrogenase [NAD(P)+]/ glutamate dehydrogenase/ oxidoreductase | chr5:2356153-2357546 FORWARDhighly similar to ( 690) DHE3\_VITVI Glutamate dehydrogenase (EC 1.4.1.3) (GDH) - Vitis vinifera (Grape)highly similar to ( 755) loc\_os04g45970 12004.m09548 protein glutamate dehydrogenase 2, putative, expressed seq=cds; coord=10:134053442..134057895:1; parent\_gene=GRMZM2G427097'

'highly similar to ( 613) AT5G17330 | Symbols: GAD, GAD1 | GAD; calmodulin binding / glutamate decarboxylase | chr5:5711141-5714839 FORWARDhighly similar to ( 612) DCE\_PETHY Glutamate decarboxylase (EC 4.1.1.15) (GAD) - Petunia hybrida (Petunia)highly similar to ( 652) loc\_os08g36320 12008.m080179 protein glutamate decarboxylase, putative, expressed seq=cds; coord=1:198230423..198233618:-1; parent\_gene=GRMZM2G017110'

'highly similar to ( 830) AT5G17330 | Symbols: GAD, GAD1 | GAD; calmodulin binding / glutamate decarboxylase | chr5:5711141-5714839 FORWARDhighly similar to ( 815) DCE\_PETHY Glutamate decarboxylase (EC 4.1.1.15) (GAD) - Petunia hybrida (Petunia)highly similar to ( 912) loc\_os03g13300 12003.m06776 protein glutamate decarboxylase, putative, expressed seq=cds; coord=9:144297855..144300816:-1; parent\_gene=GRMZM2G098875'

'highly similar to ( 756) AT2G02010 | Symbols: GAD4 | GAD4 (glutamate decarboxylase 4); calmodulin binding | chr2:474375-476495 REVERSEhighly similar to ( 764) DCE\_PETHY Glutamate decarboxylase (EC 4.1.1.15) (GAD) - Petunia hybrida (Petunia)highly similar to ( 859) loc\_os04g37460 12004.m08735 protein glutamate decarboxylase, putative, expressed seq=cds; coord=2:44991322..44994248:1; parent\_gene=GRMZM2G101069'

'highly similar to ( 688) AT1G65960 | Symbols: GAD2 | GAD2 (GLUTAMATE DECARBOXYLASE 2); calmodulin binding / glutamate decarboxylase | chr1:24552094-24557253 FORWARDhighly similar to ( 689) DCE\_PETHY Glutamate decarboxylase (EC 4.1.1.15) (GAD) - Petunia hybrida (Petunia)highly similar to ( 849) loc\_os04g37500 12004.m08739 protein glutamate decarboxylase, putative, expressed seq=cds; coord=2:44720554..44722721:-1; parent\_gene=GRMZM2G355906'

'highly similar to ( 833) AT3G48560 | Symbols: CSR1, ALS, AHAS, TZP5, IMR1 | CSR1 (CHLORSULFURON/IMIDAZOLINONE RESISTANT 1); acetolactate synthase/ pyruvate decarboxylase | chr3:18001530-18003542 REVERSEnearly identical (1083) ILV2\_MAIZE Acetolactate synthase 2, chloroplast precursor (EC 2.2.1.6) (Acetohydroxy-acid synthase 2) - Zea mays (Maize)nearly identical (1009) loc\_os02g30630 12002.m100215 protein acetolactate synthase III, chloroplast precursor, putative, expressed seq=cds; coord=4:96806900..96809179:-1; parent\_gene=GRMZM2G143357'

'highly similar to ( 829) AT5G17380 | Symbols: | pyruvate decarboxylase family protein | chr5:5724920-5726720 REVERSEweakly similar to ( 160) ILV2\_TOBAC Acetolactate synthase 2, chloroplast precursor (EC 2.2.1.6) (Acetolactate synthase II) (Acetohydroxy-acid synthase II) (ALS II) - Nicotiana tabacum (Common tobacco)nearly identical (1009) loc\_os01g32080 12001.m42655 protein 2-hydroxyphytanoyl-CoA lyase, putative, expressed seq=cds; coord=8:17966967..17971201:-1; parent\_gene=GRMZM2G175171'

'moderately similar to ( 202) AT5G17380 | Symbols: | pyruvate decarboxylase family protein | chr5:5724920-5726720 REVERSEmoderately similar to ( 237) loc\_os01g32080 12001.m42655 protein 2-hydroxyphytanoyl-CoA lyase, putative, expressed seq=cds; coord=3:203864924..203867229:-1; parent\_gene=GRMZM2G331723'



'highly similar to ( 598) AT1G80560 | Symbols: | 3-isopropylmalate dehydrogenase, chloroplast, putative | chr1:30287833-30290126 FORWARDhighly similar to ( 605) LEU3\_BRANA 3-isopropylmalate dehydrogenase, chloroplast precursor (EC 1.1.1.85) (Beta-IPM dehydrogenase) (IMDH) (3-IPM-DH) - Brassica napus (Rape)highly similar to ( 683) loc\_os03g45320 12003.m101427 protein 3-isopropylmalate dehydrogenase 2, chloroplast precursor, putative, expressed seq=cds; coord=10:148968847..148972562:1; parent\_gene=GRMZM2G104613'

'moderately similar to ( 338) AT4G00590 | Symbols: | asparaginase 2 family protein | chr4:252835-254880 FORWARDweakly similar to ( 106) ASPG\_LUPLU L-asparaginase precursor (EC 3.5.1.1) (L-asparagine amidohydrolase) [Contains: L-asparaginase subunit alpha; L-asparaginase subunit beta] - Lupinus luteus (European yellow lupin)highly similar to ( 510) loc\_os04g58600 12004.m35522 protein L-asparaginase 4 precursor, putative, expressed seq=cds; coord=10:148544790..148548840:1; parent\_gene=GRMZM2G011743'

'highly similar to ( 635) AT1G74470 | Symbols: | geranylgeranyl reductase | chr1:27991248-27992845 FORWARDhighly similar to ( 773) loc\_os02g51080 12002.m33869 protein geranylgeranyl hydrogenase, putative, expressed seq=cds; coord=5:206890298..206892838:1; parent\_gene=GRMZM2G105644'

'moderately similar to ( 453) AT1G74470 | Symbols: | geranylgeranyl reductase | chr1:27991248-27992845 FORWARDhighly similar to ( 681) loc\_os01g16020 12001.m08199 protein geranylgeranyl hydrogenase, putative, expressed seq=cds; coord=3:40062008..40064270:-1; parent\_gene=GRMZM2G419111'

'nearly identical (1134) AT4G15560 | Symbols: CLA1, DEF, CLA, DXS, DXPS2 | CLA1 (CLOROPLASTOS ALTERADOS 1); 1-deoxy-D-xylulose-5-phosphate synthase | chr4:8884218-8887254 FORWARDnearly identical (1289) DXS\_ORYSA Probable 1-deoxy-D-xylulose-5-phosphate synthase, chloroplast precursor (EC 2.2.1.7) (1-deoxyxylulose-5-phosphate synthase) (DXP synthase) (DXPS) - Oryza sativa (Rice)nearly identical (1289) loc\_os05g33840 12005.m07616 protein 1-deoxy-D-xylulose-5-phosphate synthase, chloroplast precursor, putative, expressed seq=cds; coord=6:146378412..146382661:-1; parent\_gene=GRMZM2G137151'

'nearly identical (1049) AT2G37040 | Symbols: pall, ATPAL1 | pall (Phe ammonia lyase 1); phenylalanine ammonia-lyase | chr2:15557602-15560237 REVERSEnearly identical (1203) PALY\_WHEAT Phenylalanine ammonia-lyase (EC 4.3.1.5) - Triticum aestivum (Wheat)nearly identical (1265) loc\_os04g43800 12004.m09339 protein phenylalanine ammonia-lyase, putative, expressed seq=cds; coord=2:28048958..28052061:1; parent\_gene=GRMZM2G118345'

'highly similar to ( 603) AT3G14440 | Symbols: NCED3, ATNCED3, STO1, SIS7 | NCED3 (NINE-CIS-EPOXYCAROTENOID DIOXYGENASE 3); 9-cis-epoxycarotenoid dioxygenase | chr3:4831678-4833477 REVERSEhighly similar to ( 735) loc\_os03g44380 12003.m09477 protein 9-cis-epoxycarotenoid dioxygenase 2, putative, expressed seq=cds; coord=1:174524887..174527795:1; parent\_gene=GRMZM2G407181'

'highly similar to ( 641) AT4G37770 | Symbols: ACS8 | ACS8; 1-aminocyclopropane-1-carboxylate synthase | chr4:17752222-17753925 FORWARDhighly similar to ( 788) 1A11\_ORYSA 1-aminocyclopropane-1-carboxylate synthase 1 (EC 4.4.1.14) (ACC synthase 1) (S-adenosyl-L-methionine methylthioadenosine-lyase 1) - Oryza sativa (Rice)highly similar to ( 788) loc\_os03g51740 12003.m10154 protein 1-aminocyclopropane-1-carboxylate synthase 1, putative, expressed seq=cds; coord=1:271768133..271770623:-1; parent\_gene=GRMZM2G054361'

'highly similar to ( 984) AT1G08520 | Symbols: PDE166, CHLD | CHLD; ATP binding / magnesium chelatase/ nucleoside-triphosphatase/ nucleotide binding | chr1:2696538-2700819 FORWARDnearly identical (1006) CHLD\_TOBAC Magnesium-chelatase subunit chLD, chloroplast precursor (EC 6.6.1.1) (Mg-protoporphyrin IX chelatase) (Mg-chelatase subunit D) - Nicotiana tabacum (Common tobacco)nearly identical (1081) loc\_os03g59640 12003.m10861 protein magnesium-chelatase subunit chLD, chloroplast precursor, putative, expressed seq=cds; coord=5:3095645..3103371:-1; parent\_gene=GRMZM2G043453'

'nearly identical (2226) AT5G13630 | Symbols: GUN5, CCH, CHLH, CCH1 | GUN5 (GENOMES UNCOUPLED 5); magnesium chelatase | chr5:4387920-4392082 REVERSEnearly identical (2452) loc\_os03g20700 12003.m34853 protein Mg-chelatase subunit XANTHA-F, putative, expressed seq=cds; coord=10:147954762..147960936:1; parent\_gene=GRMZM2G323024'

'highly similar to ( 528) AT5G45930 | Symbols: CHLI2, CHL I2, CHLI-2 | CHLI2 (MAGNESIUM CHELATASE I2); ATPase/ magnesium chelatase | chr5:18628095-18629565 FORWARDhighly similar to ( 545) CHLI\_SOYBN Magnesium-chelatase subunit chII, chloroplast precursor (EC 6.6.1.1) (Mg-protoporphyrin IX chelatase) - Glycine max (Soybean)highly similar to ( 617) loc\_os03g36540 12003.m08774 protein magnesium-chelatase subunit chII, chloroplast precursor, putative, expressed seq=cds; coord=10:9220900..9225379:-1; parent\_gene=GRMZM2G419806'

'moderately similar to ( 314) AT4G25080 | Symbols: CHLM | CHLM (magnesium-protoporphyrin IX methyltransferase); magnesium protoporphyrin IX methyltransferase | chr4:12877216-12878128 FORWARDmoderately similar to ( 436) loc\_os06g04150 12006.m05146 protein magnesium-protoporphyrin O-methyltransferase, putative, expressed seq=cds; coord=6:65490775..65492414:1; parent\_gene=GRMZM2G161673'

'moderately similar to ( 451) AT3G56940 | Symbols: CRD1, CHL27, ACSF | CRD1 (COPPER RESPONSE DEFECT 1); DNA binding / magnesium-protoporphyrin IX monomethyl ester (oxidative) cyclase | chr3:21076594-21078269 FORWARDmoderately similar to ( 475) CRD1\_HORVU Magnesium-protoporphyrin IX monomethyl ester [oxidative] cyclase, chloroplast precursor (EC 1.14.13.81) (Mg-protoporphyrin IX monomethyl ester oxidative cyclase) (Protein Xantha-I) - Hordeum vulgare (Barley)moderately similar to ( 492) loc\_os01g17170 12001.m42971 protein magnesium-protoporphyrin IX monomethyl ester cyclase, chloroplast precursor, putative, expressed seq=cds; coord=3:45201060..45202615:-1; parent\_gene=GRMZM2G043109'

'moderately similar to ( 388) AT5G18660 | Symbols: PCB2 | PCB2 (PALE-GREEN AND CHLOROPHYLL B REDUCED 2); 3,8-divinyl protochlorophyllide a 8-vinyl reductase | chr5:6220872-6222125 REVERSEhighly similar to ( 518) loc\_os03g22780 12003.m07676 protein PCB2, putative, expressed seq=cds; coord=1:59863427..59864863:-1; parent\_gene=GRMZM2G063048'

'highly similar to ( 556) AT5G54190 | Symbols: PORA | PORA; oxidoreductase/ protochlorophyllide reductase | chr5:21991183-21992238 REVERSEhighly similar to ( 636) PORB\_HORVU Protochlorophyllide reductase B, chloroplast precursor (EC 1.3.1.33) (PCR B) (NADPH-protochlorophyllide oxidoreductase B) (POR B) - Hordeum vulgare (Barley)highly similar to ( 639) loc\_os10g35370 12010.m06361 protein protochlorophyllide reductase B, chloroplast precursor, putative, expressed seq=cds; coord=1:227507580..227510668:-1; parent\_gene=GRMZM2G036455'

'highly similar to ( 503) AT5G54190 | Symbols: PORA | PORA; oxidoreductase/ protochlorophyllide reductase | chr5:21991183-21992238 REVERSEhighly similar to ( 533) PORB\_HORVU Protochlorophyllide reductase B, chloroplast precursor (EC 1.3.1.33) (PCR B) (NADPH-protochlorophyllide oxidoreductase B) (POR B) - Hordeum vulgare (Barley)highly similar to ( 532) loc\_os10g35370 12010.m06361 protein protochlorophyllide reductase B, chloroplast precursor, putative, expressed seq=cds; coord=5:24860911..24864132:-1; parent\_gene=GRMZM2G073351'

'moderately similar to ( 446) AT5G54190 | Symbols: PORA | PORA; oxidoreductase/ protochlorophyllide reductase | chr5:21991183-21992238 REVERSEhighly similar to ( 501) PORA\_WHEAT Protochlorophyllide reductase A, chloroplast precursor (EC 1.3.1.33) (PCR A) (NADPH-protochlorophyllide oxidoreductase A) (POR A) - Triticum aestivum (Wheat)highly similar to ( 522) loc\_os04g58200 12004.m35518 protein protochlorophyllide reductase A, chloroplast precursor, putative, expressed seq=cds; coord=2:1461402..1462989:-1; parent\_gene=GRMZM2G084958'

'weakly similar to ( 149) AT3G51820 | Symbols: ATG4, G4, CHLG | G4; chlorophyll synthetase | chr3:19216301-19218934 REVERSEweakly similar to ( 169) loc\_os05g28200 12005.m083694 protein bacteriochlorophyll synthase 34 kDa chain, putative, expressed seq=cds; coord=6:140290311..140311511:1; parent\_gene=GRMZM2G162672'

'moderately similar to ( 222) AT2G26550 | Symbols: HO2 | HO2 (HEME OXYGENASE 2); heme oxygenase (decyclizing) | chr2:11291584-11293426 REVERSEmoderately similar to ( 350) loc\_os03g27770 12003.m35265 protein heme oxygenase 2, putative, expressed seq=cds; coord=9:121601770..121608132:-1; parent\_gene=GRMZM2G004222'

'highly similar to ( 762) AT3G22200 | Symbols: POP2, GABA-T, HER1 | POP2 (POLLEN-PISTIL INCOMPATIBILITY 2); 4-aminobutyrate transaminase/ 4-aminobutyrate:pyruvate transaminase | chr3:7835286-7838863 FORWARDvery weakly similar to (94.4) GSA\_CHLRE Glutamate-1-semialdehyde 2,1-aminomutase, chloroplast precursor (EC 5.4.3.8) (GSA) (Glutamate-1-semialdehyde aminotransferase) (GSA-AT) - Chlamydomonas reinhardtiihighly similar to ( 904) loc\_os08g10510 12008.m080107 protein aminotransferase y4uB, putative, expressed seq=cds; coord=4:26893142..26901172:1; parent\_gene=GRMZM2G093900'

'highly similar to ( 744) AT3G22200 | Symbols: POP2, GABA-T, HER1 | POP2 (POLLEN-PISTIL INCOMPATIBILITY 2); 4-aminobutyrate transaminase/ 4-aminobutyrate:pyruvate transaminase | chr3:7835286-7838863 FORWARDvery weakly similar to (89.7) GSA\_BRANA Glutamate-1-semialdehyde 2,1-aminomutase, chloroplast precursor (EC 5.4.3.8) (GSA) (Glutamate-1-semialdehyde aminotransferase) (GSA-AT) - Brassica napus (Rape)highly similar to ( 899) loc\_os04g52450 12004.m101652 protein aminotransferase y4uB, putative, expressed seq=cds; coord=10:142279983..142291898:1; parent\_gene=GRMZM2G108125'

'highly similar to ( 741) AT5G63570 | Symbols: GSA1 | GSA1 (GLUTAMATE-1-SEMIALDEHYDE-2,1-AMINOMUTASE); glutamate-1-semialdehyde 2,1-aminomutase | chr5:25451957-25453620 FORWARDhighly similar to ( 839) GSA\_ORYSA Glutamate-1-semialdehyde 2,1-aminomutase, chloroplast precursor (EC 5.4.3.8) (GSA) (Glutamate-1-semialdehyde aminotransferase) (GSA-AT) - Oryza sativa (Rice)highly similar to ( 839) loc\_os08g41990 12008.m08177 protein glutamate-1-semialdehyde 2,1-aminomutase, chloroplast precursor, putative, expressed seq=cds; coord=6:155589495..155593823:-1; parent\_gene=GRMZM2G116258'

'very weakly similar to (97.4) AT3G14930 | Symbols: HEME1 | HEME1; uroporphyrinogen decarboxylase | chr3:5021290-5022577 FORWARDweakly similar to ( 103) loc\_os01g43390 12001.m150657 protein uroporphyrinogen decarboxylase, chloroplast precursor, putative, expressed seq=cds; coord=8:144960649..144961374:-1; parent\_gene=GRMZM2G024738'

'moderately similar to ( 317) AT3G14930 | Symbols: HEME1 | HEME1; uroporphyrinogen decarboxylase | chr3:5021290-5022577 FORWARDmoderately similar to ( 206) DCUP\_TOBAC Uroporphyrinogen decarboxylase, chloroplast precursor (EC 4.1.1.37) (URO-D) (UPD) - Nicotiana tabacum (Common tobacco)moderately similar to ( 383) loc\_os01g43390 12001.m150657 protein uroporphyrinogen decarboxylase, chloroplast precursor, putative, expressed seq=cds; coord=8:144965045..144968261:1; parent\_gene=GRMZM2G025031'

'highly similar to ( 581) AT2G40490 | Symbols: HEME2 | HEME2; uroporphyrinogen decarboxylase | chr2:16912961-16914988 FORWARDhighly similar to ( 677) DCUP\_MAIZE Uroporphyrinogen decarboxylase, chloroplast precursor (EC 4.1.1.37) (URO-D) (UPD) - Zea mays (Maize)highly similar to ( 696) loc\_os03g21900 12003.m07594 protein uroporphyrinogen decarboxylase, putative, expressed seq=cds; coord=1:56558248..56562800:1; parent\_gene=GRMZM2G044074'

'weakly similar to ( 134) AT3G14930 | Symbols: HEME1 | HEME1; uroporphyrinogen decarboxylase | chr3:5021290-5022577 FORWARDweakly similar to ( 123) CYSPI\_MAIZE Cysteine proteinase 1 precursor (EC 3.4.22.-) - Zea mays (Maize)weakly similar to ( 149) loc\_os01g43390 12001.m150657 protein uroporphyrinogen decarboxylase, chloroplast precursor, putative, expressed seq=cds; coord=2:204328536..204336045:1; parent\_gene=GRMZM2G046468'

'moderately similar to ( 350) AT3G14930 | Symbols: HEME1 | HEME1; uroporphyrinogen decarboxylase | chr3:5021290-5022577 FORWARDmoderately similar to ( 246) DCUP\_MAIZE Uroporphyrinogen decarboxylase, chloroplast precursor (EC 4.1.1.37) (URO-D) (UPD) - Zea mays (Maize)moderately similar to ( 421) loc\_os01g43390 12001.m150657 protein uroporphyrinogen decarboxylase, chloroplast precursor, putative, expressed seq=cds; coord=3:217796555..217806102:1; parent\_gene=GRMZM2G377609'

'moderately similar to ( 247) AT1G03475 | Symbols: LIN2, HEMF1, ATCPO-I | LIN2 (LESION INITIATION 2); coproporphyrinogen oxidase | chr1:869302-871175 REVERSEmoderately similar to ( 250) HEM6\_HORVU Coproporphyrinogen III oxidase, chloroplast precursor (EC 1.3.3.3) (Coproporphyrinogenase) (Coprogen oxidase) - Hordeum vulgare (Barley)moderately similar to ( 259) loc\_os04g52130 12004.m101648 protein coproporphyrinogen III oxidase, chloroplast precursor, putative, expressed seq=cds; coord=10:141915231..141924754:1; parent\_gene=GRMZM2G032282'

'highly similar to ( 524) AT5G63290 | Symbols: | coproporphyrinogen oxidase-related | chr5:25369349-25370894 REVERSEhighly similar to ( 738) loc\_os12g17070 12012.m073809 protein oxygen-independent coproporphyrinogen III oxidase-like protein sll1917, putative, expressed seq=cds; coord=1:4722654..4725234:-1; parent\_gene=GRMZM2G105436'

'highly similar to ( 724) AT4G01690 | Symbols: PPOX, HEMG1, PPO1 | PPOX; protoporphyrinogen oxidase | chr4:729929-732309 FORWARDhighly similar to ( 720) PPOC\_TOBAC Protoporphyrinogen oxidase, chloroplast precursor (EC 1.3.3.4) (PPO I) (Protoporphyrinogen IX oxidase isozyme I) (PPX I) - Nicotiana tabacum (Common tobacco)highly similar to ( 856) loc\_os01g18320 12001.m08374 protein protoporphyrinogen oxidase, chloroplast precursor, putative, expressed seq=cds; coord=8:876212..882478:-1; parent\_gene=GRMZM2G039396'

'moderately similar to ( 272) AT5G14220 | Symbols: HEMG2, MEE61, PPO2 | HEMG2; electron carrier/ oxidoreductase/ protoporphyrinogen oxidase | chr5:4583506-4587369 REVERSEmoderately similar to ( 282) PPOM\_TOBAC Protoporphyrinogen oxidase, mitochondrial (EC 1.3.3.4) (PPO II) (Protoporphyrinogen IX oxidase isozyme II) (PPX II) (PX-2) - Nicotiana tabacum (Common tobacco)moderately similar to ( 347) loc\_os04g41260 12004.m09105 protein protoporphyrinogen oxidase, mitochondrial, putative, expressed seq=cds; coord=2:34699024..34701280:1; parent\_gene=GRMZM2G364901'

'moderately similar to ( 204) AT1G19670 | Symbols: ATCLH1, COR11, ATHCOR1 | ATCLH1 (ARABIDOPSIS THALIANA CORONATINE-INDUCED PROTEIN 1); chlorophyllase | chr1:6803796-6804923 REVERSEweakly similar to ( 172) CLH1\_CITSI Chlorophyllase-1, chloroplast precursor (EC 3.1.1.14) (Chlorophyll-chlorophyllido hydrolase 1) (Chlase 1) - Citrus sinensis (Sweet orange)weakly similar to ( 184) loc\_os10g28370 12010.m05717 protein chlorophyllase-2, chloroplast precursor, putative, expressed seq=cds; coord=1:204440912..204442153:-1; parent\_gene=GRMZM2G103197'

'moderately similar to ( 239) AT5G43860 | Symbols: ATCLH2, CLH2 | ATCLH2; chlorophyllase | chr5:17630492-17632184 FORWARDweakly similar to ( 168) CLH1\_CITSI Chlorophyllase-1, chloroplast precursor (EC 3.1.1.14) (Chlorophyll-chlorophyllido hydrolase 1) (Chlase 1) - Citrus sinensis (Sweet orange)moderately similar to ( 336) loc\_os10g28370 12010.m05717 protein chlorophyllase-2, chloroplast precursor, putative, expressed seq=cds; coord=1:239828646..239830307:1; parent\_gene=GRMZM2G127421'

'moderately similar to ( 244) AT1G19670 | Symbols: ATCLH1, COR11, ATHCOR1 | ATCLH1 (ARABIDOPSIS THALIANA CORONATINE-INDUCED PROTEIN 1); chlorophyllase | chr1:6803796-6804923 REVERSEmoderately similar to ( 208) CLH1\_CITSI Chlorophyllase-1, chloroplast precursor (EC 3.1.1.14) (Chlorophyll-chlorophyllido hydrolase 1) (Chlase 1) - Citrus sinensis (Sweet orange)moderately similar to ( 201) loc\_os10g28370 12010.m05717 protein chlorophyllase-2, chloroplast precursor, putative, expressed seq=cds; coord=7:62130993..62132323:1; parent\_gene=GRMZM2G170734'

'moderately similar to ( 226) AT3G07040 | Symbols: RPM1, RPS3 | RPM1 (RESISTANCE TO P. SYRINGAE PV MACULICOLA 1); nucleotide binding / protein binding | chr3:2226244-2229024 REVERSEhighly similar to ( 782) loc\_os02g18510 12002.m07094 protein stripe rust resistance protein Yr10, putative seq=cds; coord=1:221236143..221241717:-1; parent\_gene=GRMZM2G077068'

'very weakly similar to (98.6) AT1G65870 | Symbols: | disease resistance-responsive family protein | chr1:24503624-24504193 FORWARDweakly similar to ( 166) loc\_os11g42550 12011.m08091 protein disease resistance response protein 206, putative, expressed seq=cds; coord=1:124469547..124470613:-1; parent\_gene=GRMZM2G433184'

'moderately similar to ( 221) AT4G37000 | Symbols: ACD2, ATRCCR | ACD2 (ACCELERATED CELL DEATH 2); red chlorophyll catabolite reductase | chr4:17442627-17443762 FORWARDmoderately similar to ( 313) RCCR\_HORVU Red chlorophyll catabolite reductase (EC 1.-.-) (RCC reductase) (HvRCCR (Fragment) - Hordeum vulgare (Barley)moderately similar to ( 375) loc\_os10g25030 12010.m05454 protein red chlorophyll catabolite reductase, putative, expressed seq=cds; coord=1:140984467..140986816:-1; parent\_gene=GRMZM2G458824'

'nearly identical (1045) AT4G24280 | Symbols: cpHsc70-1 | cpHsc70-1 (chloroplast heat shock protein 70-1); ATP binding | chr4:12590094-12593437 FORWARDnearly identical (1054) HSP7S\_PEA Stromal 70 kDa heat shock-related protein, chloroplast precursor - Pisum sativum (Garden pea)nearly identical (1136) loc\_os05g23740 12005.m06668 protein stromal 70 kDa heat shock-related protein, chloroplast precursor, putative, expressed seq=cds; coord=1:263143605..263149463:1; parent\_gene=GRMZM2G079668'

'highly similar to ( 685) AT4G16660 | Symbols: | heat shock protein 70, putative / HSP70, putative | chr4:9377225-9381232 FORWARDmoderately similar to ( 254) HSP7C\_PETHY Heat shock cognate 70 kDa protein - Petunia hybrida (Petunia)highly similar to ( 849) loc\_os02g48110 12002.m09845 protein oxygen-regulated protein precursor, putative, expressed seq=cds; coord=4:161365940..161376882:-1; parent\_gene=GRMZM2G158093'

'nearly identical (1076) AT3G12580 | Symbols: HSP70 | HSP70 (heat shock protein 70); ATP binding | chr3:3991487-3993689 REVERSEnearly identical (1087) HSP7C\_PETHY Heat shock cognate 70 kDa protein - *Petunia hybrida* (Petunia)nearly identical (1111) loc\_os01g62290 12001.m150772 protein heat shock cognate 70 kDa protein, putative, expressed seq=cds; coord=8:168955391..168958754:-1; parent\_gene=GRMZM2G310431'

'highly similar to ( 719) AT2G41680 | Symbols: NTRC | NTRC (NADPH-DEPENDENT THIOREDOXIN REDUCTASE C); thioredoxin-disulfide reductase | chr2:17376349-17379028 REVERSEhighly similar to ( 809) loc\_os07g46410 12007.m08858 protein bifunctional thioredoxin reductase/thioredoxin, putative, expressed seq=cds; coord=7:170855215..170860182:1; parent\_gene=GRMZM2G136522'

'moderately similar to ( 249) AT5G03630 | Symbols: ATMDAR2 | ATMDAR2; monodehydroascorbate reductase (NADH) | chr5:922378-924616 REVERSEmoderately similar to ( 249) MDAR\_PEA Monodehydroascorbate reductase (EC 1.6.5.4) (MDAR) (Ascorbate free radical reductase) (AFR reductase) - *Pisum sativum* (Garden pea)moderately similar to ( 298) loc\_os09g39380 12009.m06876 protein monodehydroascorbate reductase, putative, expressed seq=cds; coord=2:165615333..165616565:-1; parent\_gene=GRMZM2G084881'

'highly similar to ( 619) AT3G52880 | Symbols: ATMDAR1 | monodehydroascorbate reductase, putative | chr3:19601477-19604366 REVERSEhighly similar to ( 637) MDARS\_CUCSA Monodehydroascorbate reductase, seedling isozyme (EC 1.6.5.4) (MDAR seedling) (Ascorbate free radical reductase seedling) (AFR reductase seedling) - *Cucumis sativus* (Cucumber)highly similar to ( 748) loc\_os08g44340 12008.m08407 protein monodehydroascorbate reductase, putative, expressed seq=cds; coord=4:53078446..53083109:-1; parent\_gene=GRMZM2G134708'

'moderately similar to ( 350) AT3G27190 | Symbols: | uracil phosphoribosyltransferase, putative / UMP pyrophosphorylase, putative / UPRase, putative | chr3:10039504-10042917 REVERSEmoderately similar to ( 373) loc\_os09g32820 12009.m06368 protein uridine/cytidine kinase-like 1, putative, expressed seq=cds; coord=1:193604458..193608053:1; parent\_gene=GRMZM2G020429'

'highly similar to ( 661) AT4G26510 | Symbols: | ATP binding / kinase/ phosphotransferase, alcohol group as acceptor / uracil phosphoribosyltransferase | chr4:13384503-13387920 FORWARDhighly similar to ( 852) loc\_os02g17320 12002.m33637 protein uridine/cytidine kinase-like 1, putative, expressed seq=cds; coord=5:66021901..66031994:-1; parent\_gene=GRMZM2G034143'

'highly similar to ( 680) AT4G26510 | Symbols: | ATP binding / kinase/ phosphotransferase, alcohol group as acceptor / uracil phosphoribosyltransferase | chr4:13384503-13387920 FORWARDhighly similar to ( 864) loc\_os02g17320 12002.m33637 protein uridine/cytidine kinase-like 1, putative, expressed seq=cds; coord=4:241073345..241079426:1; parent\_gene=GRMZM2G169462'

'moderately similar to ( 464) AT5G03300 | Symbols: ADK2 | ADK2 (ADENOSINE KINASE 2); adenosine kinase/ copper ion binding / kinase | chr5:796573-798997 FORWARDmoderately similar to ( 367) ADK\_PHYPA Adenosine kinase (EC 2.7.1.20) (AK) (Adenosine 5'-phosphotransferase) - *Physcomitrella patens* (Moss)highly similar to ( 519) loc\_os04g43750 12004.m101587 protein adenosine kinase 2, putative, expressed seq=cds; coord=2:28137894..28141868:1; parent\_gene=GRMZM2G089767'

'highly similar to ( 577) AT5G03300 | Symbols: ADK2 | ADK2 (ADENOSINE KINASE 2); adenosine kinase/ copper ion binding / kinase | chr5:796573-798997 FORWARDmoderately similar to ( 474) ADK\_PHYPA Adenosine kinase (EC 2.7.1.20) (AK) (Adenosine 5'-phosphotransferase) - *Physcomitrella patens* (Moss)highly similar to ( 646) loc\_os02g41590 12002.m09195 protein adenosine kinase 2, putative, expressed seq=cds; coord=4:143082898..143087846:-1; parent\_gene=GRMZM2G135132'

'weakly similar to ( 133) AT2G01460 | Symbols: | ATP binding / kinase | chr2:206136-211765 FORWARD seq=cds; coord=10:104818768..104819926:1; parent\_gene=GRMZM2G003648'

'highly similar to ( 615) AT1G73980 | Symbols: | phosphoribulokinase/uridine kinase family protein | chr1:27820292-27823527 REVERSEhighly similar to ( 682) loc\_os02g47860 12002.m100333 protein uridine kinase, putative, expressed seq=cds; coord=5:201458665..201464423:1; parent\_gene=GRMZM2G147430'

'highly similar to ( 540) AT2G01460 | Symbols: | ATP binding / kinase | chr2:206136-211765 FORWARDhighly similar to ( 751) loc\_os04g21110 12004.m07264 protein expressed protein seq=cds; coord=10:104822498..104857891:1; parent\_gene=GRMZM2G473385'

'moderately similar to ( 495) AT5G19440 | Symbols: | cinnamyl-alcohol dehydrogenase, putative (CAD) | chr5:6556493-6558123 FORWARDmoderately similar to ( 219) DFRA\_DIACA Dihydroflavonol-4-reductase (EC 1.1.1.219) (DFR) (Dihydrokaempferol 4-reductase) - Dianthus caryophyllus (Carnation) (Clove pink)highly similar to ( 567) loc\_os01g34480 12001.m150871 protein dihydroflavonol-4-reductase, putative, expressed seq=cds; coord=5:130658345..130666795:1; parent\_gene=GRMZM2G179981'

'highly similar to ( 931) AT4G33650 | Symbols: ADL2, DRP3A | DRP3A (DYNAMIN-RELATED PROTEIN 3A); GTP binding / GTPase/ phosphoinositide binding | chr4:16161073-16166587 FORWARDnearly identical (1322) loc\_os01g69130 12001.m150447 protein dynamin-related protein 3A, putative, expressed seq=cds; coord=3:160397311..160408336:1; parent\_gene=GRMZM2G129155'

'highly similar to ( 912) AT4G33650 | Symbols: ADL2, DRP3A | DRP3A (DYNAMIN-RELATED PROTEIN 3A); GTP binding / GTPase/ phosphoinositide binding | chr4:16161073-16166587 FORWARDnearly identical (1281) loc\_os01g69130 12001.m150447 protein dynamin-related protein 3A, putative, expressed seq=cds; coord=8:161744495..161753951:1; parent\_gene=GRMZM2G180335'

'moderately similar to ( 393) AT3G12800 | Symbols: SDRB, DECR | SDRB (SHORT-CHAIN DEHYDROGENASE-REDUCTASE B); binding / catalytic/ oxidoreductase | chr3:4063463-4064757 REVERSEvery weakly similar to (93.2) GRDH\_ORYSA Glucose and ribitol dehydrogenase homolog (EC 1.1.1.-) - Oryza sativa (Rice)moderately similar to ( 491) loc\_os04g52400 12004.m10134 protein peroxisomal 2,4-dienoyl-CoA reductase, putative, expressed seq=cds; coord=2:10369985..10373158:-1; parent\_gene=GRMZM2G005107'

'moderately similar to ( 324) AT5G50700 | Symbols: | short-chain dehydrogenase/reductase (SDR) family protein | chr5:20623259-20624995 REVERSEhighly similar to ( 575) loc\_os12g27830 12012.m06599 protein corticosteroid 11-beta-dehydrogenase isozyme 1, putative, expressed seq=cds; coord=7:169214766..169217063:-1; parent\_gene=GRMZM2G006119'

'moderately similar to ( 411) AT3G12800 | Symbols: SDRB, DECR | SDRB (SHORT-CHAIN DEHYDROGENASE-REDUCTASE B); binding / catalytic/ oxidoreductase | chr3:4063463-4064757 REVERSEvery weakly similar to (94.0) GRDH\_DAUCA Glucose and ribitol dehydrogenase (EC 1.1.1.-) (Carrot ABA-induced in somatic embryos 5 protein) - Daucus carota (Carrot)highly similar to ( 509) loc\_os04g52400 12004.m10134 protein peroxisomal 2,4-dienoyl-CoA reductase, putative, expressed seq=cds; coord=10:142175734..142186868:1; parent\_gene=GRMZM2G025243'

'weakly similar to ( 116) AT3G26770 | Symbols: | short-chain dehydrogenase/reductase (SDR) family protein | chr3:9845494-9847079 FORWARDvery weakly similar to (97.1) TS2\_MAIZE Sex determination protein tasselseed-2 - Zea mays (Maize)weakly similar to ( 193) loc\_os07g46830 12007.m08900 protein sex determination protein tasselseed-2, putative, expressed seq=cds; coord=7:171728748..171729994:1; parent\_gene=GRMZM2G025885'

'moderately similar to ( 308) AT4G05530 | Symbols: IBR1, SDRA | IBR1 (INDOLE-3-BUTYRIC ACID RESPONSE 1); binding / catalytic/ oxidoreductase | chr4:2816462-2818074 FORWARDvery weakly similar to (99.0) GRDH\_DAUCA Glucose and ribitol dehydrogenase (EC 1.1.1.-) (Carrot ABA-induced in somatic embryos 5 protein) - Daucus carota (Carrot)moderately similar to ( 366) loc\_os09g04730 12009.m22042 protein dehydrogenase/reductase SDR family member 2, putative, expressed seq=cds; coord=6:162486424..162491946:-1; parent\_gene=GRMZM2G041694'

'moderately similar to ( 244) AT3G26760 | Symbols: | short-chain dehydrogenase/reductase (SDR) family protein | chr3:9843639-9844899 FORWARDweakly similar to ( 178) TS2\_MAIZE Sex determination protein tasselseed-2 - Zea mays (Maize)moderately similar to ( 338) loc\_os11g32030 12011.m07105 protein sex determination protein tasselseed-2, putative, expressed seq=cds; coord=4:22835928..22842145:1; parent\_gene=GRMZM2G047800'

'weakly similar to ( 189) AT5G02540 | Symbols: | short-chain dehydrogenase/reductase (SDR) family protein | chr5:568609-570720 FORWARDmoderately similar to ( 238) loc\_os01g05840 12001.m42866 protein retinol dehydrogenase 11, putative, expressed seq=cds; coord=3:4133973..4135826:1; parent\_gene=GRMZM2G050915'

'moderately similar to ( 306) AT5G15940 | Symbols: | binding / catalytic/ oxidoreductase | chr5:5202801-5204715 FORWARDmoderately similar to ( 435) loc\_os09g17750 12009.m05033 protein dehydrogenase/reductase SDR family member on chromosome X precursor, putative, expressed seq=cds; coord=7:94515828..94520376:-1; parent\_gene=GRMZM2G053958'

'moderately similar to ( 215) AT1G10310 | Symbols: | short-chain dehydrogenase/reductase (SDR) family protein | chr1:3381733-3383874 REVERSEmoderately similar to ( 270) loc\_os02g35170 12002.m08605 protein expressed protein seq=cds; coord=9:25857875..25858565:-1; parent\_gene=GRMZM2G059361'

'moderately similar to ( 299) AT5G10050 | Symbols: | short-chain dehydrogenase/reductase (SDR) family protein | chr5:3144254-3145643 FORWARDmoderately similar to ( 397) loc\_os04g38420 12004.m08832 protein oxidoreductase, putative, expressed seq=cds; coord=2:42800989..42805578:1; parent\_gene=GRMZM2G065171'

'moderately similar to ( 452) AT5G04900 | Symbols: | short-chain dehydrogenase/reductase (SDR) family protein | chr5:1434826-1437194 FORWARDvery weakly similar to (84.7) SDR1\_PICAB Short-chain type dehydrogenase/reductase (EC 1.-.-) - Picea abies (Norway spruce) (Picea excelsa)highly similar to ( 523) loc\_os03g45194 12003.m09550 protein short-chain dehydrogenase/reductase SDR, putative, expressed seq=cds; coord=5:15650410..15655937:1; parent\_gene=GRMZM2G065194'

'moderately similar to ( 207) AT1G52340 | Symbols: ABA2, SIS4, GIN1, SDR1, ISI4, SRE1, ATABA2, ATSDR1 | ABA2 (ABA DEFICIENT 2); alcohol dehydrogenase/ oxidoreductase/ xanthoxin dehydrogenase | chr1:19489997-19491527 REVERSEmoderately similar to ( 204) TS2\_MAIZE Sex determination protein tasselseed-2 - Zea mays (Maize)moderately similar to ( 345) loc\_os04g33240 12004.m08419 protein sex determination protein tasselseed-2, putative, expressed seq=cds; coord=2:76993674..76995064:1; parent\_gene=GRMZM2G069523'

'moderately similar to ( 288) AT3G59710 | Symbols: | short-chain dehydrogenase/reductase (SDR) family protein | chr3:22055220-22057156 REVERSEmoderately similar to ( 409) loc\_os02g39490 12002.m09037 protein carbonyl reductase 3, putative, expressed seq=cds; coord=10:127609556..127613140:-1; parent\_gene=GRMZM2G070279'

'weakly similar to ( 154) AT4G03140 | Symbols: | binding / catalytic/ oxidoreductase | chr4:1392191-1393662 FORWARDweakly similar to ( 122) TS2\_MAIZE Sex determination protein tasselseed-2 - Zea mays (Maize)moderately similar to ( 236) loc\_os07g40250 12007.m08266 protein sex determination protein tasselseed-2, putative, expressed seq=cds; coord=7:162398129..162399427:1; parent\_gene=GRMZM2G076981'

'moderately similar to ( 313) AT1G67730 | Symbols: YBR159, KCR1 | YBR159; ketoreductase/ oxidoreductase | chr1:25391676-25393365 FORWARDmoderately similar to ( 463) loc\_os02g38440 12002.m08932 protein steroid dehydrogenase KIK-I, putative, expressed seq=cds; coord=4:132759801..132763262:-1; parent\_gene=GRMZM2G087323'

'moderately similar to ( 317) AT5G50700 | Symbols: | short-chain dehydrogenase/reductase (SDR) family protein | chr5:20623259-20624995 REVERSEmoderately similar to ( 288) loc\_os04g32070 12004.m08305 protein steroleosin, putative, expressed seq=cds; coord=2:68600637..68602278:-1; parent\_gene=GRMZM2G108338'

'moderately similar to ( 263) AT4G05530 | Symbols: IBR1, SDRA | IBR1 (INDOLE-3-BUTYRIC ACID RESPONSE 1); binding / catalytic/ oxidoreductase | chr4:2816462-2818074 FORWARDvery weakly similar to (88.6) GRDH\_DAUCA Glucose and ribitol dehydrogenase (EC 1.1.1.-) (Carrot ABA-induced in somatic embryos 5 protein) - Daucus carota (Carrot)moderately similar to ( 317) loc\_os09g04730 12009.m22042 protein dehydrogenase/reductase SDR family member 2, putative, expressed seq=cds; coord=7:32624687..32633165:-1; parent\_gene=GRMZM2G109743'

'moderately similar to ( 254) AT3G55290 | Symbols: | short-chain dehydrogenase/reductase (SDR) family protein | chr3:20502653-20503730 FORWARDvery weakly similar to (94.0) FABG3\_BRANA 3-oxoacyl-[acyl-carrier-protein] reductase 3, chloroplast precursor (EC 1.1.1.100) (3-ketoacyl-acyl carrier protein reductase 3) - Brassica napus (Rape)moderately similar to ( 370) loc\_os08g39960 12008.m26742 protein 3-oxoacyl-reductase, chloroplast precursor, putative, expressed seq=cds; coord=1:188344346..188355656:-1; parent\_gene=GRMZM2G115442'

'moderately similar to ( 291) AT1G10310 | Symbols: | short-chain dehydrogenase/reductase (SDR) family protein | chr1:3381733-3383874 REVERSEmoderately similar to ( 375) loc\_os02g35170 12002.m08605 protein expressed protein seq=cds; coord=5:173685524..173688118:-1; parent\_gene=GRMZM2G128146'

'moderately similar to ( 205) AT5G02540 | Symbols: | short-chain dehydrogenase/reductase (SDR) family protein | chr5:568609-570720 FORWARDmoderately similar to ( 250) loc\_os10g40030 12010.m21964 protein WW domain-containing oxidoreductase, putative, expressed seq=cds; coord=9:118060344..118063910:1; parent\_gene=GRMZM2G128577'

'moderately similar to ( 246) AT3G59710 | Symbols: | short-chain dehydrogenase/reductase (SDR) family protein | chr3:22055220-22057156 REVERSEmoderately similar to ( 380) loc\_os02g39490 12002.m09037 protein carbonyl reductase 3, putative, expressed seq=cds; coord=2:33004446..33008192:1; parent\_gene=GRMZM2G135277'

'moderately similar to ( 261) AT2G47140 | Symbols: | short-chain dehydrogenase/reductase (SDR) family protein | chr2:19350970-19352059 REVERSEmoderately similar to ( 242) TS2\_MAIZE Sex determination protein tasselseed-2 - Zea mays (Maize)moderately similar to ( 422) loc\_os03g61740 12003.m11055 protein sex determination protein tasselseed-2, putative, expressed seq=cds; coord=1:295436901..295438003:-1; parent\_gene=GRMZM2G156739'

'moderately similar to ( 367) AT5G02540 | Symbols: | short-chain dehydrogenase/reductase (SDR) family protein | chr5:568609-570720 FORWARDmoderately similar to ( 466) loc\_os01g05840 12001.m42866 protein retinol dehydrogenase 11, putative, expressed seq=cds; coord=3:17182875..17186450:-1; parent\_gene=GRMZM2G162527'

'moderately similar to ( 295) AT1G52340 | Symbols: ABA2, SIS4, GIN1, SDR1, ISI4, SRE1, ATABA2, ATSDR1 | ABA2 (ABA DEFICIENT 2); alcohol dehydrogenase/ oxidoreductase/ xanthoxin dehydrogenase | chr1:19489997-19491527 REVERSEmoderately similar to ( 241) TS2\_MAIZE Sex determination protein tasselseed-2 - Zea mays (Maize)moderately similar to ( 412) loc\_os03g59610 12003.m10858 protein sex determination protein tasselseed-2, putative, expressed seq=cds; coord=5:3145791..3147542:-1; parent\_gene=GRMZM2G332976'

'moderately similar to ( 263) AT3G59710 | Symbols: | short-chain dehydrogenase/reductase (SDR) family protein | chr3:22055220-22057156 REVERSEmoderately similar to ( 409) loc\_os02g39490 12002.m09037 protein carbonyl reductase 3, putative, expressed seq=cds; coord=4:134994992..134998245:-1; parent\_gene=GRMZM2G374313'

'weakly similar to ( 187) AT5G10050 | Symbols: | short-chain dehydrogenase/reductase (SDR) family protein | chr5:3144254-3145643 FORWARDmoderately similar to ( 268) loc\_os12g43740 12012.m08147 protein expressed protein seq=cds; coord=3:92694099..92694968:-1; parent\_gene=GRMZM2G403313'

'moderately similar to ( 290) AT3G51680 | Symbols: | short-chain dehydrogenase/reductase (SDR) family protein | chr3:19173622-19174667 REVERSEhighly similar to ( 533) TS2\_MAIZE Sex determination protein tasselseed-2 - Zea mays (Maize)moderately similar to ( 436) loc\_os03g18740 12003.m07295 protein sex determination protein tasselseed-2, putative, expressed seq=cds; coord=1:46678942..46680363:1; parent\_gene=GRMZM2G455809'

'moderately similar to ( 355) AT4G11410 | Symbols: | short-chain dehydrogenase/reductase (SDR) family protein | chr4:6945127-6947186 REVERSEweakly similar to ( 101) POR\_AVESA Protochlorophyllide reductase (EC 1.3.1.33) (PCR) (NADPH-protochlorophyllide oxidoreductase) (POR) (Fragment) - Avena sativa (Oat)moderately similar to ( 436) loc\_os10g40020 12010.m06775 protein WW domain-containing oxidoreductase, putative, expressed seq=cds; coord=1:87599876..87602403:-1; parent\_gene=GRMZM2G464885'

'moderately similar to ( 203) AT4G37580 | Symbols: HLS1, COP3, UNS2 | HLS1 (HOOKLESS 1); N-acetyltransferase | chr4:17658932-17660564 FORWARDmoderately similar to ( 386) loc\_os06g44100 12006.m08938 protein acetyltransferase, GNAT family protein, expressed seq=cds; coord=6:95712352..95714082:1; parent\_gene=GRMZM2G049730'

'moderately similar to ( 251) AT5G16800 | Symbols: | GCN5-related N-acetyltransferase (GNAT) family protein | chr5:5524720-5526295 REVERSEmoderately similar to ( 322) loc\_os02g46700 12002.m33825 protein N-acetyltransferase, putative, expressed seq=cds; coord=5:198971871..198973129:-1; parent\_gene=GRMZM2G169326'

'highly similar to ( 623) AT1G67490 | Symbols: GCS1, KNF | GCS1 (GLUCOSIDASE 1); alpha-glucosidase | chr1:25280633-25286581 REVERSEhighly similar to ( 879) loc\_os01g69210 12001.m150828 protein mannosyl-oligosaccharide glucosidase, putative, expressed seq=cds; coord=3:160074249..160087303:-1; parent\_gene=GRMZM2G126468'



'highly similar to ( 973) AT5G11720 | Symbols: | alpha-glucosidase 1 (AGLU1) | chr5:3776840-3780025 FORWARDnearly identical (1307) AGLU\_ORYSA  
Probable alpha-glucosidase Os06g0675700 precursor (EC 3.2.1.20) (Maltase) - Oryza sativa (Rice)nearly identical (1307) loc\_os06g46284 12006.m091810  
protein alpha-glucosidase precursor, putative, expressed seq=cds; coord=6:91630823..91634799:1; parent\_gene=GRMZM2G428518'

'highly similar to ( 689) AT2G43020 | Symbols: ATPAO2 | ATPAO2 (Polyamine oxidase 2); amine oxidase/ electron carrier/ oxidoreductase | chr2:17891945-  
17894440 FORWARDweakly similar to ( 135) PAO\_MAIZE Polyamine oxidase precursor (EC 1.5.3.11) - Zea mays (Maize)highly similar to ( 860)  
loc\_os04g53190 12004.m35201 protein lysine-specific histone demethylase 1, putative, expressed seq=cds; coord=2:8992621..8997876:1;  
parent\_gene=GRMZM2G000052'

'nearly identical (1134) AT4G16310 | Symbols: LDL3 | LDL3 (LSD1-LIKE3); amine oxidase/ electron carrier/ oxidoreductase | chr4:9218636-9224764  
FORWARDweakly similar to ( 102) PAO\_MAIZE Polyamine oxidase precursor (EC 1.5.3.11) - Zea mays (Maize)nearly identical (2142) loc\_os10g38850  
12010.m06652 protein amine oxidase, flavin-containing family protein, expressed seq=cds; coord=1:82010853..82020375:1;  
parent\_gene=GRMZM2G030529'

'moderately similar to ( 361) AT4G29720 | Symbols: ATPAO5 | ATPAO5 (Polyamine oxidase 5); amine oxidase/ electron carrier/ oxidoreductase |  
chr4:14553456-14555057 REVERSEvery weakly similar to (84.0) PAO\_MAIZE Polyamine oxidase precursor (EC 1.5.3.11) - Zea mays (Maize)highly similar  
to ( 729) loc\_os01g51320 12001.m11313 protein peroxisomal N1-acetyl-spermine/spermidine oxidase, putative, expressed seq=cds;  
coord=3:203893426..203895144:1; parent\_gene=GRMZM2G035994'

'moderately similar to ( 354) AT5G61290 | Symbols: | flavin-containing monooxygenase family protein / FMO family protein | chr5:24648599-24650647  
FORWARDmoderately similar to ( 429) loc\_os07g02130 12007.m04687 protein disulfide oxidoreductase/ monooxygenase/ oxidoreductase, putative seq=cds;  
coord=7:1787892..1789224:-1; parent\_gene=GRMZM2G106588'

'moderately similar to ( 423) AT5G61290 | Symbols: | flavin-containing monooxygenase family protein / FMO family protein | chr5:24648599-24650647  
FORWARDhighly similar to ( 542) loc\_os01g26876 12001.m09132 protein disulfide oxidoreductase/ monooxygenase/ oxidoreductase, putative, expressed  
seq=cds; coord=7:1557370..1559284:1; parent\_gene=GRMZM2G108637'

'moderately similar to ( 414) AT5G61290 | Symbols: | flavin-containing monooxygenase family protein / FMO family protein | chr5:24648599-24650647  
FORWARDhighly similar to ( 540) loc\_os07g02130 12007.m04687 protein disulfide oxidoreductase/ monooxygenase/ oxidoreductase, putative seq=cds;  
coord=7:1627368..1629084:1; parent\_gene=GRMZM2G148605'

'moderately similar to ( 375) AT5G61290 | Symbols: | flavin-containing monooxygenase family protein / FMO family protein | chr5:24648599-24650647  
FORWARDmoderately similar to ( 491) loc\_os01g26876 12001.m09132 protein disulfide oxidoreductase/ monooxygenase/ oxidoreductase, putative,  
expressed seq=cds; coord=7:1568021..1569655:1; parent\_gene=GRMZM2G162222'

'highly similar to ( 682) AT2G43020 | Symbols: ATPAO2 | ATPAO2 (Polyamine oxidase 2); amine oxidase/ electron carrier/ oxidoreductase | chr2:17891945-  
17894440 FORWARDweakly similar to ( 134) PAO\_MAIZE Polyamine oxidase precursor (EC 1.5.3.11) - Zea mays (Maize)highly similar to ( 848)  
loc\_os04g53190 12004.m35201 protein lysine-specific histone demethylase 1, putative, expressed seq=cds; coord=10:143058298..143063415:1;  
parent\_gene=GRMZM2G396856'

'moderately similar to ( 268) AT1G49670 | Symbols: NQR | NQR; binding / catalytic/ oxidoreductase/ zinc ion binding | chr1:18381591-18386021  
REVERSEmoderately similar to ( 302) loc\_os09g28570 12009.m22117 protein zinc-binding alcohol dehydrogenase domain-containing protein 2, putative,  
expressed seq=cds; coord=7:126470209..126475939:1; parent\_gene=GRMZM2G479068'

'moderately similar to ( 257) AT2G29150 | Symbols: | tropinone reductase, putative / tropine dehydrogenase, putative | chr2:12535715-12536964  
REVERSEweakly similar to ( 116) SDR1\_PICAB Short-chain type dehydrogenase/reductase (EC 1.-.-.-) - Picea abies (Norway spruce) (Picea  
excelsa)moderately similar to ( 293) loc\_os11g43360 12011.m08171 protein tropinone reductase 2, putative seq=cds; coord=4:140232..141202:-1;  
parent\_gene=GRMZM2G000586'

'moderately similar to ( 225) AT5G06060 | Symbols: | tropinone reductase, putative / tropine dehydrogenase, putative | chr5:1824066-1825833 REVERSEvery weakly similar to (99.4) SDR1\_PICAB Short-chain type dehydrogenase/reductase (EC 1.-.-) - Picea abies (Norway spruce) (Picea excelsa)moderately similar to ( 295) loc\_os11g43200 12011.m08155 protein tropinone reductase 2, putative seq=cds; coord=8:159899298..159901286:-1; parent\_gene=GRMZM2G002304'

'moderately similar to ( 275) AT2G29360 | Symbols: | tropinone reductase, putative / tropine dehydrogenase, putative | chr2:12603849-12605121 FORWARDweakly similar to ( 127) GRDH\_ORYSA Glucose and ribitol dehydrogenase homolog (EC 1.1.1.-) - Oryza sativa (Rice)moderately similar to ( 318) loc\_os11g43200 12011.m08155 protein tropinone reductase 2, putative seq=cds; coord=4:3588667..3591754:1; parent\_gene=GRMZM2G097981'

'moderately similar to ( 320) AT5G06060 | Symbols: | tropinone reductase, putative / tropine dehydrogenase, putative | chr5:1824066-1825833 REVERSEvery weakly similar to (96.7) GRDH\_ORYSA Glucose and ribitol dehydrogenase homolog (EC 1.1.1.-) - Oryza sativa (Rice)moderately similar to ( 390) loc\_os03g16220 12003.m101290 protein tropinone reductase, putative, expressed seq=cds; coord=1:39213217..39219522:-1; parent\_gene=GRMZM2G141799'

'moderately similar to ( 235) AT5G06060 | Symbols: | tropinone reductase, putative / tropine dehydrogenase, putative | chr5:1824066-1825833 REVERSEvery weakly similar to (93.2) FABG4\_BRANA 3-oxoacyl-[acyl-carrier-protein] reductase 4 (EC 1.1.1.100) (3-ketoacyl-acyl carrier protein reductase 4) (Fragment) - Brassica napus (Rape)moderately similar to ( 281) loc\_os11g43360 12011.m08171 protein tropinone reductase 2, putative seq=cds; coord=2:230414138..230415824:1; parent\_gene=GRMZM2G152258'

'moderately similar to ( 271) AT1G07440 | Symbols: | tropinone reductase, putative / tropine dehydrogenase, putative | chr1:2286700-2287665 REVERSEweakly similar to ( 105) FABG4\_BRANA 3-oxoacyl-[acyl-carrier-protein] reductase 4 (EC 1.1.1.100) (3-ketoacyl-acyl carrier protein reductase 4) (Fragment) - Brassica napus (Rape)moderately similar to ( 364) loc\_os11g43200 12011.m08155 protein tropinone reductase 2, putative seq=cds; coord=4:3514620..3515646:1; parent\_gene=GRMZM2G370988'

'moderately similar to ( 452) AT2G30470 | Symbols: HSI2, VAL1 | HSI2 (HIGH-LEVEL EXPRESSION OF SUGAR-INDUCIBLE GENE 2); transcription factor/ transcription repressor | chr2:12980904-12984724 REVERSEvery weakly similar to (83.2) VIV1\_MAIZE Regulatory protein viviparous-1 - Zea mays (Maize)nearly identical (1250) loc\_os07g37610 12007.m08011 protein HSI2, putative, expressed seq=cds; coord=7:157670367..157678433:1; parent\_gene=GRMZM2G008356'

'moderately similar to ( 242) AT1G72050 | Symbols: TFIIA | TFIIA (TRANSCRIPTION FACTOR IIIA); nucleic acid binding / zinc ion binding | chr1:27115808-27117228 FORWARDmoderately similar to ( 371) loc\_os05g03020 12005.m04836 protein transcription factor IIIA, putative, expressed seq=cds; coord=6:29282248..29286063:-1; parent\_gene=GRMZM2G050939'

'highly similar to ( 665) AT4G00730 | Symbols: ANL2, AHDP | ANL2 (ANTHOCYANINLESS 2); transcription factor/ transcription regulator | chr4:301071-304103 REVERSEhighly similar to ( 881) loc\_os04g48070 12004.m35428 protein homeobox protein OCL1, putative, expressed seq=cds; coord=10:136932960..136939534:1; parent\_gene=AC235534.1\_FG007'

'moderately similar to ( 494) AT1G12800 | Symbols: | S1 RNA-binding domain-containing protein | chr1:4361778-4365189 REVERSEnearly identical (1026) loc\_os02g02390 12002.m05588 protein RNA binding protein, putative, expressed seq=cds; coord=5:69311998..69322471:1; parent\_gene=GRMZM2G088114'

'moderately similar to ( 211) AT1G79180 | Symbols: ATMYB63, MYB63 | MYB63 (MYB DOMAIN PROTEIN 63); DNA binding / transcription activator/ transcription factor | chr1:29786509-29787589 FORWARDmoderately similar to ( 243) MYB1\_MAIZE Myb-related protein Zm1 - Zea mays (Maize)moderately similar to ( 358) loc\_os04g50770 12004.m09974 protein myb-related protein Zm1, putative, expressed seq=cds; coord=10:140190031..140191484:-1; parent\_gene=GRMZM2G097636'

'moderately similar to ( 211) AT1G79180 | Symbols: ATMYB63, MYB63 | MYB63 (MYB DOMAIN PROTEIN 63); DNA binding / transcription activator/ transcription factor | chr1:29786509-29787589 FORWARDmoderately similar to ( 243) MYB1\_MAIZE Myb-related protein Zm1 - Zea mays (Maize)moderately similar to ( 344) loc\_os04g50770 12004.m09974 protein myb-related protein Zm1, putative, expressed seq=cds; coord=10:140193073..140194565:-1; parent\_gene=GRMZM2G097638'

'moderately similar to ( 227) AT1G32770 | Symbols: ANAC012, SND1, NST3 | ANAC012 (ARABIDOPSIS NAC DOMAIN CONTAINING PROTEIN 12); specific transcriptional repressor/ transcription activator/ transcription factor | chr1:11865343-11866950 REVERSEmoderately similar to ( 205) NAC76\_ORYSA NAC domain-containing protein 76 (ONAC076) - Oryza sativa (Rice)moderately similar to ( 348) loc\_os06g04090 12006.m05140 protein NAM protein, putative, expressed seq=cds; coord=6:66026862..66029306:1; parent\_gene=GRMZM2G091490'

'very weakly similar to (96.3) AT4G28300 | Symbols: | hydroxyproline-rich glycoprotein family protein | chr4:14015414-14016823 FORWARDmoderately similar to ( 479) loc\_os01g48220 12001.m11014 protein expressed protein seq=cds; coord=8:149981862..149984439:-1; parent\_gene=GRMZM2G160990'

'moderately similar to ( 217) AT2G34830 | Symbols: WRKY35, MEE24, AtWRKY35 | WRKY35 (WRKY DNA-binding protein 35); transcription factor | chr2:14693839-14696378 REVERSEhighly similar to ( 550) loc\_os04g50920 12004.m09989 protein WRKY DNA binding domain containing protein, expressed seq=cds; coord=2:12799342..12803684:-1; parent\_gene=GRMZM2G024898'

'very weakly similar to (99.4) AT2G22750 | Symbols: | basic helix-loop-helix (bHLH) family protein | chr2:9672145-9673624 FORWARDmoderately similar to ( 220) loc\_os10g01530 12010.m03577 protein helix-loop-helix DNA-binding domain containing protein, expressed seq=cds; coord=1:112407261..112409295:-1; parent\_gene=GRMZM2G150327'

'highly similar to ( 813) AT1G30680 | Symbols: | toprim domain-containing protein | chr1:10881665-10886060 FORWARDnearly identical (1098) loc\_os06g45980 12006.m09126 protein nucleic acid binding protein, putative, expressed seq=cds; coord=6:92610561..92616400:1; parent\_gene=GRMZM2G164835'

'moderately similar to ( 282) AT5G10770 | Symbols: | chloroplast nucleoid DNA-binding protein, putative | chr5:3403331-3405331 REVERSEmoderately similar to ( 497) loc\_os02g48860 12002.m09920 protein aspartic proteinase nepenthesin-2 precursor, putative, expressed seq=cds; coord=5:203698818..203701217:1; parent\_gene=GRMZM2G128992'

'moderately similar to ( 329) AT5G10770 | Symbols: | chloroplast nucleoid DNA-binding protein, putative | chr5:3403331-3405331 REVERSEhighly similar to ( 549) loc\_os02g48860 12002.m09920 protein aspartic proteinase nepenthesin-2 precursor, putative, expressed seq=cds; coord=4:163962237..163964018:1; parent\_gene=GRMZM2G141036'

'moderately similar to ( 438) AT5G09880 | Symbols: | RNA recognition motif (RRM)-containing protein | chr5:3081646-3085179 REVERSEhighly similar to ( 524) loc\_os03g05830 12003.m06105 protein splicing factor, putative, expressed seq=cds; coord=5:32658760..32668791:-1; parent\_gene=GRMZM2G071589'

'moderately similar to ( 322) AT5G09880 | Symbols: | RNA recognition motif (RRM)-containing protein | chr5:3081646-3085179 REVERSEmoderately similar to ( 416) loc\_os10g30370 12010.m22002 protein RNA-binding region-containing protein 2, putative, expressed seq=cds; coord=1:237741444..237749566:1; parent\_gene=GRMZM2G076597'

'highly similar to ( 806) AT3G09660 | Symbols: MCM8 | MCM8; ATP binding / DNA binding / DNA-dependent ATPase/ nucleoside-triphosphatase/ nucleotide binding | chr3:2961314-2966166 REVERSEmoderately similar to ( 286) MCM3\_MAIZE DNA replication licensing factor MCM3 homolog (Replication origin activator) (ROA protein) (Fragment) - Zea mays (Maize)highly similar to ( 549) loc\_os05g38850 12005.m08064 protein DNA replication licensing factor MCM8, putative, expressed seq=cds; coord=8:117615277..117633296:-1; parent\_gene=GRMZM2G163658'

'weakly similar to ( 169) AT2G14050 | Symbols: MCM9 | MCM9; ATP binding / DNA binding / DNA-dependent ATPase/ nucleoside-triphosphatase/ nucleotide binding | chr2:5909240-5913817 FORWARDweakly similar to ( 174) loc\_os06g11500 12006.m05867 protein minichromosome maintenance protein MCM, putative, expressed seq=cds; coord=6:111140069..111155365:1; parent\_gene=GRMZM2G534116'

'moderately similar to ( 450) AT5G04050 | Symbols: | FUNCTIONS IN: molecular\_function unknown; LOCATED IN: cellular\_component unknown; EXPRESSED IN: 21 plant structures; EXPRESSED DURING: 13 growth stages; BEST Arabidopsis thaliana protein match is: intron maturase, type II family protein (TAIR:AT1G74350.1). | chr5:1096092-1098512 FORWARDnearly identical (1004) loc\_os06g44880 12006.m09015 protein type II intron maturase family protein seq=cds; coord=6:94852018..94854240:1; parent\_gene=AC213050.3\_FG001'

'very weakly similar to ( 100) AT4G31150 | Symbols: | endonuclease V family protein | chr4:15143907-15145469 REVERSEweakly similar to ( 159) loc\_os06g45330 12006.m09060 protein endonuclease V, putative, expressed seq=cds; coord=6:94211805..94216531:-1; parent\_gene=GRMZM2G353125'

'moderately similar to ( 338) AT3G04880 | Symbols: DRT102 | DRT102 (DNA-DAMAGE-REPAIR/TOLERATION 2) | chr3:1346431-1347363 REVERSEmoderately similar to ( 490) loc\_os01g36090 12001.m09906 protein DNA-damage-repair/toleration protein DRT102, putative, expressed seq=cds; coord=3:227494431..227495354:1; parent\_gene=AC197555.3\_FG008'

'weakly similar to ( 102) AT1G79530 | Symbols: GAPCP-1 | GAPCP-1 (GLYCERALDEHYDE-3-PHOSPHATE DEHYDROGENASE OF PLASTID 1); NAD or NADH binding / binding / catalytic/ glyceraldehyde-3-phosphate dehydrogenase (phosphorylating)/ glyceraldehyde-3-phosphate dehydrogenase | chr1:29916232-29919088 REVERSEweakly similar to ( 101) G3PD\_MAIZE Glyceraldehyde-3-phosphate dehydrogenase, cytosolic 2 (EC 1.2.1.12) - Zea mays (Maize)moderately similar to ( 254) loc\_os04g28820 12004.m07996 protein retrotransposon protein, putative, unclassified, expressed seq=cds; coord=6:3434798..3457041:-1; parent\_gene=GRMZM2G337905'

'weakly similar to ( 114) AT5G52650 | Symbols: | 40S ribosomal protein S10 (RPS10C) | chr5:21355781-21357003 REVERSEweakly similar to ( 140) RS10\_ORYSA 40S ribosomal protein S10 - Oryza sativa (Rice)weakly similar to ( 140) loc\_os04g35090 12004.m08600 protein 40S ribosomal protein S10, putative, expressed seq=cds; coord=4:40010831..40016436:-1; parent\_gene=GRMZM2G459828'

'highly similar to ( 625) AT2G24820 | Symbols: TIC55 | TIC55 (TRANSLOCON AT THE INNER ENVELOPE MEMBRANE OF CHLOROPLASTS 55); 2 iron, 2 sulfur cluster binding / electron carrier/ oxidoreductase | chr2:10575038-10576829 FORWARDweakly similar to ( 128) CAO\_ORYSA Chlorophyllide a oxygenase, chloroplast precursor (EC 1.13.12.14) (Chlorophyll a oxygenase) (Chlorophyll b synthase) - Oryza sativa (Rice)highly similar to ( 783) loc\_os02g54980 12002.m10525 protein pheophorbide a oxygenase, chloroplast precursor, putative, expressed seq=cds; coord=5:213279291..213281471:1; parent\_gene=GRMZM2G018484'

'highly similar to ( 688) AT1G44446 | Symbols: CH1, ATCAO, CAO | CH1 (CHLORINA 1); chlorophyllide a oxygenase | chr1:16849132-16851152 REVERSEhighly similar to ( 896) CAO\_ORYSA Chlorophyllide a oxygenase, chloroplast precursor (EC 1.13.12.14) (Chlorophyll a oxygenase) (Chlorophyll b synthase) - Oryza sativa (Rice)highly similar to ( 896) loc\_os10g41780 12010.m21805 protein chlorophyllide a oxygenase, chloroplast precursor, putative, expressed seq=cds; coord=8:157169357..157173476:1; parent\_gene=GRMZM2G038487'

'highly similar to ( 714) AT1G44446 | Symbols: CH1, ATCAO, CAO | CH1 (CHLORINA 1); chlorophyllide a oxygenase | chr1:16849132-16851152 REVERSEhighly similar to ( 876) CAO\_ORYSA Chlorophyllide a oxygenase, chloroplast precursor (EC 1.13.12.14) (Chlorophyll a oxygenase) (Chlorophyll b synthase) - Oryza sativa (Rice)highly similar to ( 876) loc\_os10g41780 12010.m21805 protein chlorophyllide a oxygenase, chloroplast precursor, putative, expressed seq=cds; coord=3:146605798..146608649:1; parent\_gene=GRMZM2G171390'

'highly similar to ( 764) AT5G46570 | Symbols: BSK2 | BSK2 (BR-SIGNALING KINASE 2); ATP binding / binding / kinase/ protein kinase/ protein tyrosine kinase | chr5:18894687-18897198 FORWARDweakly similar to ( 124) CRI4\_MAIZE Putative receptor protein kinase CRINKLY4 precursor (EC 2.7.11.1) - Zea mays (Maize)highly similar to ( 884) loc\_os10g42110 12010.m06968 protein ATP binding protein, putative, expressed seq=cds; coord=9:113419985..113424715:-1; parent\_gene=GRMZM2G054634'

'highly similar to ( 769) AT5G46570 | Symbols: BSK2 | BSK2 (BR-SIGNALING KINASE 2); ATP binding / binding / kinase/ protein kinase/ protein tyrosine kinase | chr5:18894687-18897198 FORWARDweakly similar to ( 120) CRI4\_MAIZE Putative receptor protein kinase CRINKLY4 precursor (EC 2.7.11.1) - Zea mays (Maize)highly similar to ( 883) loc\_os10g42110 12010.m06968 protein ATP binding protein, putative, expressed seq=cds; coord=1:97817366..97822485:1; parent\_gene=GRMZM2G169080'

'moderately similar to ( 379) AT3G15180 | Symbols: | proteasome-related | chr3:5111952-5115803 FORWARDhighly similar to ( 710) loc\_os05g48340 12005.m27964 protein expressed protein seq=cds; coord=6:163821880..163829466:1; parent\_gene=GRMZM2G086132'

'very weakly similar to (95.9) AT3G19380 | Symbols: PUB25 | PUB25 (PLANT U-BOX 25); binding / ubiquitin-protein ligase | chr3:6714602-6715867 REVERSEvery weakly similar to (94.0) SPL11\_ORYSA Spotted leaf protein 11 (Spotted leaf11) (Cell death-related protein SPL11) - Oryza sativa (Rice)moderately similar to ( 360) loc\_os04g35680 12004.m08657 protein U-box domain containing protein, expressed seq=cds; coord=2:48738351..48740309:-1; parent\_gene=GRMZM2G361100'

'moderately similar to ( 259) loc\_os07g23900 12007.m06668 protein F-box domain containing protein, expressed seq=cds; coord=1:150897326..150899612:1; parent\_gene=GRMZM2G171713'

'weakly similar to ( 181) AT3G52390 | Symbols: | tatD-related deoxyribonuclease family protein | chr3:19423105-19425183 REVERSEweakly similar to ( 120) CYSPI\_MAIZE Cysteine proteinase I precursor (EC 3.4.22.-) - Zea mays (Maize)moderately similar to ( 204) loc\_os07g06440 12007.m05105 protein deoxyribonuclease tatD, putative, expressed seq=cds; coord=4:35255836..35264898:-1; parent\_gene=GRMZM2G384762'

'moderately similar to ( 339) AT2G29050 | Symbols: ATRBL1 | ATRBL1 (Arabidopsis thaliana Rhomboid-like 1) | chr2:12478245-12479653 FORWARDmoderately similar to ( 327) loc\_os11g47840 12011.m08581 protein membrane protein, putative, expressed seq=cds; coord=3:17930459..17939430:-1; parent\_gene=GRMZM2G100889'

'weakly similar to ( 155) AT1G28390 | Symbols: | protein kinase family protein | chr1:9966814-9968226 REVERSEweakly similar to ( 138) CRI4\_MAIZE Putative receptor protein kinase CRINKLY4 precursor (EC 2.7.11.1) - Zea mays (Maize)moderately similar to ( 304) loc\_os01g16230 12001.m08220 protein protein kinase APK1A, chloroplast precursor, putative seq=cds; coord=3:38438156..38439898:-1; parent\_gene=GRMZM2G368388'

'highly similar to ( 544) AT5G54130 | Symbols: | calcium-binding EF hand family protein | chr5:21962900-21964841 FORWARDhighly similar to ( 762) loc\_os10g13550 12010.m21844 protein calcium ion binding protein, putative, expressed seq=cds; coord=5:39798255..39802675:1; parent\_gene=GRMZM2G048205'

'moderately similar to ( 284) AT5G52210 | Symbols: ATARLB1, ATGB1 | ATGB1 (ARABIDOPSIS THALIANA GTP-BINDING PROTEIN 1); GTP binding | chr5:21205567-21206840 FORWARDweakly similar to ( 122) ARF1\_SOLTU ADP-ribosylation factor 1 - Solanum tuberosum (Potato)moderately similar to ( 343) loc\_os03g27450 12003.m101362 protein ARF-related protein, putative, expressed seq=cds; coord=1:68107606..68110989:1; parent\_gene=GRMZM2G082836'

'weakly similar to ( 200) AT3G02520 | Symbols: GRF7, GF14 NU | GRF7 (GENERAL REGULATORY FACTOR 7); protein binding / protein phosphorylated amino acid binding | chr3:526800-527915 REVERSEmoderately similar to ( 228) 14334\_ORYSA 14-3-3-like protein GF14-D (G-box factor 14-3-3 homolog D) - Oryza sativa (Rice)moderately similar to ( 228) loc\_os11g34450 12011.m07303 protein 14-3-3-like protein, putative, expressed seq=cds; coord=7:159919660..159920834:-1; parent\_gene=GRMZM2G305211'

'nearly identical (1504) AT5G65460 | Symbols: | kinesin motor protein-related | chr5:26161831-26169001 REVERSEweakly similar to ( 138) FLA10\_CHLRE Kinesin-like protein FLA10 (Protein KHP1) - Chlamydomonas reinhardtiihighly similar to ( 894) loc\_os06g11380 12006.m05855 protein ATP binding protein, putative, expressed seq=cds; coord=9:7186959..7210629:-1; parent\_gene=GRMZM2G017257'

'weakly similar to ( 188) AT2G46910 | Symbols: | plastid-lipid associated protein PAP / fibrillin family protein | chr2:19272427-19273856 FORWARD seq=cds; coord=5:23255313..23259490:-1; parent\_gene=GRMZM2G026800'

'highly similar to ( 541) AT2G36250 | Symbols: FTSZ2-1, ATFTSZ2-1 | FTSZ2-1; protein binding / structural molecule | chr2:15197661-15199932 REVERSEhighly similar to ( 643) loc\_os03g44420 12003.m09481 protein cell division protein ftsZ, putative, expressed seq=cds; coord=10:148918417..148922373:1; parent\_gene=GRMZM2G177224'

'weakly similar to ( 113) AT4G03270 | Symbols: CYCD6;1 | CYCD6;1 (Cyclin D6;1); cyclin-dependent protein kinase | chr4:1432375-1433691 REVERSEmoderately similar to ( 340) loc\_os07g37010 12007.m29223 protein CYCD6, putative, expressed seq=cds; coord=7:156667098..156669547:-1; parent\_gene=GRMZM2G050933'

'highly similar to ( 738) AT3G44880 | Symbols: ACD1, LLS1, PAO | ACD1 (ACCELERATED CELL DEATH 1); iron-sulfur cluster binding / pheophorbide a oxygenase | chr3:16383858-16386204 FORWARDvery weakly similar to (85.5) CAO\_ORYSA Chlorophyllide a oxygenase, chloroplast precursor (EC 1.13.12.14) (Chlorophyll a oxygenase) (Chlorophyll b synthase) - Oryza sativa (Rice)highly similar to ( 921) loc\_os03g05310 12003.m06055 protein pheophorbide a oxygenase, chloroplast precursor, putative, expressed seq=cds; coord=1:10092334..10096672:1; parent\_gene=GRMZM2G339563'

'moderately similar to ( 327) AT4G27760 | Symbols: FEY, FEY3 | FEY (FOREVER YOUNG); binding / catalytic/ oxidoreductase | chr4:13844151-13846563 FORWARDmoderately similar to ( 434) loc\_os02g02470 12002.m05596 protein WW domain-containing oxidoreductase, putative, expressed seq=cds; coord=4:240037685..240041832:-1; parent\_gene=GRMZM2G018251'

'moderately similar to ( 209) AT4G38730 | Symbols: | unknown protein | chr4:18080484-18082305 REVERSEmoderately similar to ( 247) loc\_os01g65310 12001.m12644 protein non-imprinted in Prader-Willi/Angelman syndrome region protein 1homolog, putative, expressed seq=cds; coord=3:173795427..173798467:1; parent\_gene=GRMZM2G037229'

'moderately similar to ( 402) AT2G21120 | Symbols: | unknown protein | chr2:9052103-9054266 REVERSEhighly similar to ( 581) loc\_os05g35570 12005.m07787 protein non-imprinted in Prader-Willi/Angelman syndrome region protein 1, putative, expressed seq=cds; coord=8:101676586..101680204:-1; parent\_gene=GRMZM2G097421'

'moderately similar to ( 474) AT1G15960 | Symbols: NRAMP6, ATNRAMP6 | NRAMP6; inorganic anion transmembrane transporter/ metal ion transmembrane transporter | chr1:5482202-5485066 REVERSEhighly similar to ( 672) loc\_os07g15460 12007.m05990 protein metal transporter Nramp6, putative, expressed seq=cds; coord=2:170852138..170857890:1; parent\_gene=GRMZM2G366919'

'highly similar to ( 638) AT5G47560 | Symbols: ATTD1, ATSDAT, TDT | TDT (TONOPLAST DICARBOXYLATE TRANSPORTER); malate transmembrane transporter/ sodium:dicarboxylate symporter | chr5:19287895-19290347 REVERSEhighly similar to ( 820) loc\_os08g39370 12008.m07918 protein tonoplast dicarboxylate transporter, putative, expressed seq=cds; coord=3:215902932..215905725:1; parent\_gene=GRMZM2G099382'

'highly similar to ( 920) AT2G36910 | Symbols: ATPGP1, PGP1, ABCB1 | ABCB1 (ATP BINDING CASSETTE SUBFAMILY B1); ATPase, coupled to transmembrane movement of substances / auxin efflux transmembrane transporter/ calmodulin binding | chr2:15502162-15507050 FORWARDhighly similar to ( 813) MDR\_ORYSA Putative multidrug resistance protein (P-glycoprotein) - Oryza sativa (Rice)nearly identical (2029) loc\_os08g05690 12008.m04712 protein multidrug resistance protein 11, putative seq=cds; coord=10:80571279..80577409:-1; parent\_gene=GRMZM2G333183'

'moderately similar to ( 320) AT1G67940 | Symbols: ATNAP3 | ATNAP3; transporter | chr1:25477805-25478667 FORWARDweakly similar to ( 124) MDR\_ORYSA Putative multidrug resistance protein (P-glycoprotein) - Oryza sativa (Rice)moderately similar to ( 420) loc\_os06g48060 12006.m09332 protein phosphate import ATP-binding protein pstB 1, putative, expressed seq=cds; coord=5:53614005..53616345:-1; parent\_gene=GRMZM2G432480'

'moderately similar to ( 483) AT3G18830 | Symbols: ATPLT5 | ATPLT5 (POLYOL TRANSPORTER 5); D-ribose transmembrane transporter/ D-xylose transmembrane transporter/ carbohydrate transmembrane transporter/ galactose transmembrane transporter/ glucose transmembrane transporter/ glycerol transmembrane transporter/ mann | chr3:6489000-6491209 REVERSEweakly similar to ( 138) STC\_RICCO Sugar carrier protein C - Ricinus communis (Castor bean)highly similar to ( 613) loc\_os07g39350 12007.m08177 protein proton myo-inositol cotransporter, putative, expressed seq=cds; coord=2:207635000..207637178:1; parent\_gene=GRMZM2G062156'

'highly similar to ( 551) AT1G77610 | Symbols: | glucose-6-phosphate/phosphate translocator-related | chr1:29165489-29167486 FORWARDweakly similar to ( 105) TPT\_MAIZE Triose phosphate/phosphate translocator, chloroplast precursor (cTPT) - Zea mays (Maize)highly similar to ( 613) loc\_os04g59550 12004.m101707 protein organic anion transporter, putative, expressed seq=cds; coord=2:26289852..26292439:1; parent\_gene=GRMZM2G127591'  
'seq=cds; coord=1:260656556..260659264:1; parent\_gene=GRMZM2G014934'  
'seq=cds; coord=3:126981163..126982596:-1; parent\_gene=GRMZM2G016586'

'weakly similar to ( 132) AT5G53620 | Symbols: | unknown protein | chr5:21781217-21785061 FORWARDmoderately similar to ( 308) loc\_os08g43060 12008.m080226 protein expressed protein seq=cds; coord=1:196696007..196698701:-1; parent\_gene=GRMZM2G019050'

'moderately similar to ( 328) AT5G60540 | Symbols: EMB2407, ATPDX2, PDX2 | PDX2 (PYRIDOXINE BIOSYNTHESIS 2); glutaminase/ glutaminyl-tRNA synthase (glutamine-hydrolyzing)/ protein heterodimerization | chr5:24336874-24338647 REVERSEmoderately similar to ( 432) loc\_os02g03740 12002.m05723 protein glutamine amidotransferase subunit pdxT, putative, expressed seq=cds; coord=4:239138043..239141632:-1; parent\_gene=GRMZM2G023528'

'very weakly similar to (98.6) AT4G25170 | Symbols: | FUNCTIONS IN: molecular\_function unknown; INVOLVED IN: biological\_process unknown; EXPRESSED IN: 23 plant structures; EXPRESSED DURING: 13 growth stages; CONTAINS InterPro DOMAIN/s: Uncharacterised conserved protein UCP012943 (InterPro:IPR016606); BEST Arabidopsis thaliana protein match is: unknown protein (TAIR:AT5G61490.1). | chr4:12909740-12911389 FORWARDmoderately similar to ( 322) loc\_os02g44010 12002.m100296 protein expressed protein seq=cds; coord=4:152396996..152406561:-1; parent\_gene=GRMZM2G026922'

'moderately similar to ( 245) loc\_os04g24340 12004.m07566 protein phytase, putative seq=cds; coord=3:132154770..132156278:1; parent\_gene=GRMZM2G043336'

'moderately similar to ( 281) AT5G44860 | Symbols: | unknown protein | chr5:18110688-18111653 REVERSEmoderately similar to ( 432) loc\_os01g58620 12001.m12004 protein expressed protein seq=cds; coord=3:188300344..188302031:1; parent\_gene=GRMZM2G046911'

'moderately similar to ( 267) loc\_os04g24340 12004.m07566 protein phytase, putative seq=cds; coord=3:131702644..131704144:-1; parent\_gene=GRMZM2G140101'

'moderately similar to ( 207) AT1G72640 | Symbols: | binding / catalytic | chr1:27346409-27348147 REVERSEmoderately similar to ( 313) loc\_os03g29730 12003.m101371 protein expressed protein seq=cds; coord=1:71332736..71337389:-1; parent\_gene=GRMZM2G149383'

'moderately similar to ( 430) AT3G44190 | Symbols: | pyridine nucleotide-disulphide oxidoreductase family protein | chr3:15902004-15903402 REVERSEhighly similar to ( 585) loc\_os02g05680 12002.m05916 protein disulfide oxidoreductase/ electron carrier/ oxidoreductase, putative, expressed seq=cds; coord=4:237494138..237497773:-1; parent\_gene=GRMZM2G166145'

'moderately similar to ( 491) AT1G29980 | Symbols: | INVOLVED IN: biological\_process unknown; LOCATED IN: plasma membrane, anchored to membrane; EXPRESSED IN: 24 plant structures; EXPRESSED DURING: 13 growth stages; CONTAINS InterPro DOMAIN/s: Protein of unknown function DUF642 (InterPro:IPR006946), Galactose-binding like (InterPro:IPR008979); BEST Arabidopsis thaliana protein match is: unknown protein (TAIR:AT2G34510.1); Has 180 Blast hits to 163 proteins in 15 species: Archae - 0; Bacteria - 10; Metazoa - 0; Fungi - 0; Plants - 170; Viruses - 0; Other Eukaryotes - 0 (source: NCBI BLINK). | chr1:10503411-10505994 REVERSEhighly similar to ( 672) loc\_os01g55190 12001.m11679 protein expressed protein seq=cds; coord=3:196094333..196096899:-1; parent\_gene=GRMZM2G324705'

'seq=cds; coord=6:13097849..13098393:-1; parent\_gene=GRMZM2G375015'

'seq=cds; coord=5:178086882..178087933:1; parent\_gene=GRMZM2G377168'

'seq=cds; coord=8:16443989..16444752:-1; parent\_gene=GRMZM2G380414'

'weakly similar to ( 124) AT3G52950 | Symbols: | CBS domain-containing protein / octicosapeptide/Phox/Bemp1 (PB1) domain-containing protein | chr3:19634866-19636536 FORWARDweakly similar to ( 162) loc\_os11g06930 12011.m04890 protein CBS domain containing protein, expressed seq=cds; coord=9:27709782..27712278:-1; parent\_gene=GRMZM2G426688'

'seq=cds; coord=6:106804219..106804832:-1; parent\_gene=GRMZM2G427503'

'nearly identical (1159) AT1G18270 | Symbols: | ketose-bisphosphate aldolase class-II family protein | chr1:6283634-6293772 REVERSEnearly identical (1417) loc\_os06g14740 12006.m06189 protein ketose-bisphosphate aldolases family protein, expressed seq=cds; coord=6:117823306..117843150:-1; parent\_gene=GRMZM2G431708'

'moderately similar to ( 253) AT5G44860 | Symbols: | unknown protein | chr5:18110688-18111653 REVERSEmoderately similar to ( 384) loc\_os01g58620 12001.m12004 protein expressed protein seq=cds; coord=8:171597448..171598728:1; parent\_gene=GRMZM2G438299'

'seq=cds; coord=7:172675158..172675868:-1; parent\_gene=GRMZM2G472852'

'weakly similar to ( 167) AT5G13560 | Symbols: | unknown protein | chr5:4361579-4366318 REVERSEweakly similar to ( 136) PFPA\_SOLTU Pyrophosphate--fructose 6-phosphate 1-phosphotransferase alpha subunit (EC 2.7.1.90) (PPF) (6-phosphofructokinase, pyrophosphate dependent) (Pyrophosphate-dependent 6-phosphofructose-1-kinase) (PPi-PFK) - Solanum tuberosum (Potato)moderately similar to ( 238) loc\_os03g17270 12003.m35165 protein expressed protein seq=cds; coord=8:145658003..145667670:-1; parent\_gene=GRMZM2G487136'

'seq=cds; coord=1:19104324..19104800:1; parent\_gene=AC177946.2\_FG004'

'very weakly similar to (81.3) loc\_os01g56680 12001.m11825 protein photosystem II reaction center W protein, chloroplast precursor, putative, expressed seq=cds; coord=3:192033354..192034113:1; parent\_gene=AC190623.3\_FG001'

'moderately similar to ( 422) AT5G63910 | Symbols: FCLY | FCLY (FARNESYL CYSTEINE LYASE); prenylcysteine oxidase | chr5:25572053-25574077 REVERSEweakly similar to ( 160) loc\_os04g59630 12004.m10838 protein prenylcysteine oxidase precursor, putative, expressed seq=cds; coord=10:149747387..149749334:-1; parent\_gene=AC234201.1\_FG003'

'weakly similar to ( 125) AT5G02060 | Symbols: | integral membrane protein, putative | chr5:404908-405774 FORWARDweakly similar to ( 131) loc\_os01g62850 12001.m12405 protein expressed protein seq=cds; coord=8:95579124..95580800:-1; parent\_gene=GRMZM2G054227'

'weakly similar to ( 102) AT4G25170 | Symbols: | FUNCTIONS IN: molecular\_function unknown; INVOLVED IN: biological\_process unknown; EXPRESSED IN: 23 plant structures; EXPRESSED DURING: 13 growth stages; CONTAINS InterPro DOMAIN/s: Uncharacterised conserved protein UCP012943 (InterPro:IPR016606); BEST Arabidopsis thaliana protein match is: unknown protein (TAIR:AT5G61490.1). | chr4:12909740-12911389 FORWARDmoderately similar to ( 279) loc\_os02g44010 12002.m100296 protein expressed protein seq=cds; coord=5:191901867..191905412:-1; parent\_gene=GRMZM2G056762'

'seq=cds; coord=1:274521321..274523353:-1; parent\_gene=GRMZM2G095519'

'highly similar to ( 563) AT1G34630 | Symbols: | unknown protein | chr1:12685317-12687107 FORWARDhighly similar to ( 661) loc\_os03g09090 12003.m06415 protein expressed protein seq=cds; coord=1:19698949..19703374:-1; parent\_gene=GRMZM2G113775'

'very weakly similar to (91.7) AT5G02060 | Symbols: | integral membrane protein, putative | chr5:404908-405774 FORWARDweakly similar to ( 114) loc\_os05g38250 12005.m08004 protein expressed protein seq=cds; coord=3:179723501..179725522:1; parent\_gene=GRMZM2G119273'

'nearly identical (1201) AT5G24810 | Symbols: | ABC1 family protein | chr5:8516902-8522616 REVERSEnearly identical (1518) loc\_os06g48770 12006.m32168 protein retrotransposon protein, putative, SINE subclass, expressed seq=cds; coord=6:86747563..86755916:1; parent\_gene=GRMZM2G140917'

'moderately similar to ( 268) loc\_os11g36920 12011.m07541 protein hypothetical protein seq=cds; coord=6:70837501..70846423:1; parent\_gene=GRMZM2G386337'

---
