# Supplementary material
Source: PubMed Central journal article supplement (PMC4453775)
Supplement: supp_pp.15.00025_00025supptbl6.pdf [file supp_pp.15.00025_00025supptbl6.pdf]

**Table S6.** Functional category of maize carbon and nitrogen metabolite priori candidates via

Gene annotation can be found in Table S5.

| <b>GO ID</b> | <b>Category</b>    | <b>Description</b>                      | <b>No. of candidates</b> | <b><i>p</i>-value</b> | <b>FDR</b> |
|--------------|--------------------|-----------------------------------------|--------------------------|-----------------------|------------|
| GO:0005975   | biological process | carbohydrate metabolic process          | 43                       | 5.90E-27              | 2.30E-24   |
| GO:0016052   | biological process | carbohydrate catabolic process          | 25                       | 1.50E-26              | 2.90E-24   |
| GO:0006006   | biological process | glucose metabolic process               | 24                       | 7.40E-26              | 9.70E-24   |
| GO:0006066   | biological process | alcohol metabolic process               | 29                       | 4.60E-25              | 4.60E-23   |
| GO:0019318   | biological process | hexose metabolic process                | 24                       | 6.10E-25              | 4.80E-23   |
| GO:0044275   | biological process | cellular carbohydrate catabolic process | 21                       | 9.00E-24              | 6.00E-22   |

|            |                    |                                         |    |          |          |
|------------|--------------------|-----------------------------------------|----|----------|----------|
| GO:0019320 | biological process | hexose catabolic process                | 21 | 1.30E-23 | 6.20E-22 |
| GO:0006007 | biological process | glucose catabolic process               | 21 | 1.30E-23 | 6.20E-22 |
| GO:0044262 | biological process | cellular carbohydrate metabolic process | 28 | 5.80E-23 | 2.60E-21 |
| GO:0005996 | biological process | monosaccharide metabolic process        | 24 | 7.60E-23 | 3.00E-21 |
| GO:0006096 | biological process | glycolysis                              | 19 | 3.70E-22 | 1.30E-20 |
| GO:0046365 | biological process | monosaccharide catabolic process        | 21 | 4.50E-22 | 1.50E-20 |
| GO:0046164 | biological process | alcohol catabolic process               | 21 | 7.10E-22 | 2.20E-20 |
| GO:0044248 | biological process | cellular catabolic process              | 23 | 2.50E-18 | 7.20E-17 |

|            |                    |                                                |    |          |          |
|------------|--------------------|------------------------------------------------|----|----------|----------|
| GO:0044265 | biological process | cellular macromolecule catabolic process       | 21 | 3.20E-18 | 8.30E-17 |
| GO:0006091 | biological process | generation of precursor metabolites and energy | 22 | 1.50E-15 | 3.80E-14 |
| GO:0009056 | biological process | catabolic process                              | 27 | 3.80E-10 | 9.00E-09 |
| GO:0051186 | biological process | cofactor metabolic process                     | 12 | 6.60E-10 | 1.50E-08 |
| GO:0009057 | biological process | macromolecule catabolic process                | 25 | 7.70E-10 | 1.60E-08 |
| GO:0051188 | biological process | cofactor biosynthetic process                  | 10 | 3.00E-09 | 6.00E-08 |
| GO:0006108 | biological process | malate metabolic process                       | 5  | 7.00E-08 | 1.30E-06 |
| GO:0006779 | biological process | porphyrin biosynthetic process                 | 5  | 1.20E-07 | 2.10E-06 |
| GO:0034641 | biological process | cellular nitrogen compound metabolic process   | 11 | 2.40E-07 | 4.10E-06 |

|            |                    |                                                |   |          |          |
|------------|--------------------|------------------------------------------------|---|----------|----------|
| GO:0006778 | biological process | porphyrin metabolic process                    | 5 | 3.30E-07 | 5.50E-06 |
| GO:0033014 | biological process | tetrapyrrole biosynthetic process              | 5 | 5.40E-07 | 8.60E-06 |
| GO:0033013 | biological process | tetrapyrrole metabolic process                 | 5 | 1.20E-06 | 1.80E-05 |
| GO:0009712 | biological process | catechol metabolic process                     | 5 | 6.30E-06 | 7.10E-05 |
| GO:0009238 | biological process | enterobactin metabolic process                 | 5 | 6.30E-06 | 7.10E-05 |
| GO:0009239 | biological process | enterobactin biosynthetic process              | 5 | 6.30E-06 | 7.10E-05 |
| GO:0018958 | biological process | phenol metabolic process                       | 5 | 6.30E-06 | 7.10E-05 |
| GO:0019540 | biological process | siderophore biosynthetic process from catechol | 5 | 6.30E-06 | 7.10E-05 |
| GO:0019184 | biological process | nonribosomal peptide biosynthetic process      | 5 | 6.30E-06 | 7.10E-05 |
| GO:0009237 | biological process | siderophore metabolic process                  | 5 | 6.30E-06 | 7.10E-05 |
| GO:0034311 | biological process | diol metabolic process                         | 5 | 6.30E-06 | 7.10E-05 |
| GO:0019290 | biological process | siderophore biosynthetic process               | 5 | 6.30E-06 | 7.10E-05 |

|            |                       |                                                          |    |          |         |
|------------|-----------------------|----------------------------------------------------------|----|----------|---------|
| GO:0015979 | biological<br>process | photosynthesis                                           | 6  | 1.10E-05 | 0.00013 |
| GO:0043648 | biological<br>process | dicarboxylic<br>acid metabolic<br>process                | 5  | 1.40E-05 | 0.00015 |
| GO:0043043 | biological<br>process | peptide<br>biosynthetic<br>process                       | 5  | 1.40E-05 | 0.00015 |
| GO:0044271 | biological<br>process | cellular nitrogen<br>compound<br>biosynthetic<br>process | 8  | 1.70E-05 | 0.00017 |
| GO:0018130 | biological<br>process | heterocycle<br>biosynthetic<br>process                   | 5  | 1.80E-05 | 0.00018 |
| GO:0005976 | biological<br>process | polysaccharide<br>metabolic<br>process                   | 7  | 1.90E-05 | 0.00018 |
| GO:0006518 | biological<br>process | peptide<br>metabolic<br>process                          | 5  | 2.50E-05 | 0.00024 |
| GO:0043436 | biological<br>process | oxoacid<br>metabolic<br>process                          | 12 | 3.10E-05 | 0.00028 |
| GO:0019752 | biological<br>process | carboxylic acid<br>metabolic<br>process                  | 12 | 3.10E-05 | 0.00028 |
| GO:0006082 | biological<br>process | organic acid<br>metabolic<br>process                     | 12 | 3.20E-05 | 0.00028 |
| GO:0042180 | biological<br>process | cellular ketone<br>metabolic<br>process                  | 12 | 3.40E-05 | 0.00029 |

|            |                       |                                                          |    |          |         |
|------------|-----------------------|----------------------------------------------------------|----|----------|---------|
| GO:0008152 | biological<br>process | metabolic<br>process                                     | 78 | 8.70E-05 | 0.00073 |
| GO:0006725 | biological<br>process | cellular<br>aromatic<br>compound<br>metabolic<br>process | 6  | 0.00046  | 0.0038  |
| GO:0055114 | biological<br>process | oxidation<br>reduction                                   | 6  | 0.001    | 0.0084  |
| GO:0044237 | biological<br>process | cellular<br>metabolic<br>process                         | 53 | 0.0029   | 0.023   |
| GO:0016053 | biological<br>process | organic acid<br>biosynthetic<br>process                  | 5  | 0.0053   | 0.041   |
| GO:0046394 | biological<br>process | carboxylic acid<br>biosynthetic<br>process               | 5  | 0.0053   | 0.041   |

|            |                    |                                                      |    |       |       |
|------------|--------------------|------------------------------------------------------|----|-------|-------|
| GO:0044238 | biological process | primary metabolic process                            | 54 | 0.011 | 0.084 |
| GO:0009308 | biological process | amine metabolic process                              | 6  | 0.026 | 0.19  |
| GO:0006520 | biological process | cellular amino acid metabolic process                | 5  | 0.037 | 0.26  |
| GO:0044106 | biological process | cellular amine metabolic process                     | 5  | 0.037 | 0.26  |
| GO:0046483 | biological process | heterocycle metabolic process                        | 5  | 0.064 | 0.45  |
| GO:0006519 | biological process | cellular amino acid and derivative metabolic process | 5  | 0.068 | 0.46  |
| GO:0009987 | biological process | cellular process                                     | 54 | 0.073 | 0.49  |

|            |                    |                                                                       |    |      |   |
|------------|--------------------|-----------------------------------------------------------------------|----|------|---|
| GO:0042592 | biological process | homeostatic process                                                   | 7  | 0.27 | 1 |
| GO:0006807 | biological process | nitrogen compound metabolic process                                   | 14 | 0.73 | 1 |
| GO:0034645 | biological process | cellular macromolecule biosynthetic process                           | 9  | 0.9  | 1 |
| GO:0050826 | biological process | response to freezing                                                  | 7  | 0.18 | 1 |
| GO:0006139 | biological process | nucleobase, nucleoside, nucleotide and nucleic acid metabolic process | 5  | 1    | 1 |
| GO:0044260 | biological process | cellular macromolecule metabolic process                              | 29 | 0.27 | 1 |
| GO:0065007 | biological process | biological regulation                                                 | 9  | 0.98 | 1 |
| GO:0065008 | biological process | regulation of biological quality                                      | 7  | 0.31 | 1 |
| GO:0032501 | biological process | multicellular organismal process                                      | 7  | 0.23 | 1 |
| GO:0009628 | biological process | response to abiotic stimulus                                          | 7  | 0.21 | 1 |



|            |                    |                                    |    |      |   |
|------------|--------------------|------------------------------------|----|------|---|
| GO:0009058 | biological process | biosynthetic process               | 22 | 0.21 | 1 |
| GO:0006950 | biological process | response to stress                 | 7  | 0.5  | 1 |
| GO:0009059 | biological process | macromolecule biosynthetic process | 9  | 0.9  | 1 |
| GO:0042309 | biological process | homiothermy                        | 7  | 0.18 | 1 |
| GO:0009266 | biological process | response to temperature stimulus   | 7  | 0.19 | 1 |
| GO:0009409 | biological process | response to cold                   | 7  | 0.18 | 1 |
| GO:0001659 | biological process | temperature homeostasis            | 7  | 0.18 | 1 |
| GO:0019538 | biological process | protein metabolic process          | 5  | 1    | 1 |
| GO:0050896 | biological process | response to stimulus               | 7  | 0.62 | 1 |
| GO:0043170 | biological process | macromolecule metabolic process    | 35 | 0.17 | 1 |
| GO:0044249 | biological process | cellular biosynthetic process      | 19 | 0.38 | 1 |

|            |                    |                                                                                       |    |          |          |
|------------|--------------------|---------------------------------------------------------------------------------------|----|----------|----------|
| GO:0019200 | molecular function | carbohydrate kinase activity                                                          | 11 | 8.30E-14 | 2.00E-11 |
| GO:0003872 | molecular function | 6-phosphofructokinase activity                                                        | 9  | 1.00E-12 | 1.10E-10 |
| GO:0008443 | molecular function | phosphofructokinase activity                                                          | 9  | 1.40E-12 | 1.10E-10 |
| GO:0016829 | molecular function | lyase activity                                                                        | 14 | 3.00E-10 | 1.80E-08 |
| GO:0048037 | molecular function | cofactor binding                                                                      | 17 | 8.40E-10 | 4.10E-08 |
| GO:0050662 | molecular function | coenzyme binding                                                                      | 14 | 6.30E-09 | 2.60E-07 |
| GO:0016614 | molecular function | oxidoreductase activity, acting on CH-OH group of donors                              | 11 | 9.20E-09 | 3.20E-07 |
| GO:0016616 | molecular function | oxidoreductase activity, acting on the CH-OH group of donors, NAD or NADP as acceptor | 10 | 3.50E-08 | 1.10E-06 |
| GO:0016615 | molecular function | malate dehydrogenase activity                                                         | 5  | 7.00E-08 | 1.90E-06 |
| GO:0016831 | molecular function | carboxy-lyase activity                                                                | 7  | 1.50E-07 | 3.60E-06 |

|            |                       |                                                                   |    |          |          |
|------------|-----------------------|-------------------------------------------------------------------|----|----------|----------|
| GO:0004022 | molecular<br>function | alcohol<br>dehydrogenase<br>(NAD) activity                        | 5  | 3.30E-07 | 7.20E-06 |
| GO:0051287 | molecular<br>function | NAD or NADH<br>binding                                            | 6  | 3.80E-07 | 7.70E-06 |
| GO:0003824 | molecular<br>function | catalytic<br>activity                                             | 82 | 1.90E-06 | 3.50E-05 |
| GO:0016830 | molecular<br>function | carbon-carbon<br>lyase activity                                   | 7  | 2.20E-06 | 3.90E-05 |
| GO:0004553 | molecular<br>function | hydrolase<br>activity,<br>hydrolyzing O-<br>glycosyl<br>compounds | 11 | 2.60E-06 | 4.20E-05 |
| GO:0016798 | molecular<br>function | hydrolase<br>activity, acting<br>on glycosyl<br>bonds             | 11 | 5.10E-06 | 7.80E-05 |

|            |                    |                                                                                       |    |          |          |
|------------|--------------------|---------------------------------------------------------------------------------------|----|----------|----------|
| GO:0016627 | molecular function | oxidoreductase activity, acting on the CH-CH group of donors                          | 6  | 5.50E-06 | 7.80E-05 |
| GO:0016836 | molecular function | hydro-lyase activity                                                                  | 5  | 5.90E-06 | 7.90E-05 |
| GO:0008667 | molecular function | 2,3-dihydro-2,3-dihydroxybenzoate dehydrogenase activity                              | 5  | 6.30E-06 | 8.00E-05 |
| GO:0016628 | molecular function | oxidoreductase activity, acting on the CH-CH group of donors, NAD or NADP as acceptor | 5  | 1.00E-05 | 0.00012  |
| GO:0016491 | molecular function | oxidoreductase activity                                                               | 23 | 1.30E-05 | 0.00015  |
| GO:0016835 | molecular function | carbon-oxygen lyase activity                                                          | 5  | 1.90E-05 | 0.00021  |
| GO:0019842 | molecular function | vitamin binding                                                                       | 6  | 9.40E-05 | 0.00099  |
| GO:0016740 | molecular function | transferase activity                                                                  | 29 | 0.00024  | 0.0024   |
| GO:0050660 | molecular function | FAD binding                                                                           | 5  | 0.00069  | 0.0066   |

|            |                    |                                                                                    |    |        |       |
|------------|--------------------|------------------------------------------------------------------------------------|----|--------|-------|
| GO:0016746 | molecular function | transferase activity, transferring acyl groups                                     | 6  | 0.0012 | 0.011 |
| GO:0016301 | molecular function | kinase activity                                                                    | 16 | 0.0026 | 0.024 |
| GO:0016773 | molecular function | phosphotransferase activity, alcohol group as acceptor                             | 15 | 0.0041 | 0.035 |
| GO:0016772 | molecular function | transferase activity, transferring phosphorus-containing groups                    | 17 | 0.0062 | 0.051 |
| GO:0016853 | molecular function | isomerase activity                                                                 | 5  | 0.0064 | 0.051 |
| GO:0000166 | molecular function | nucleotide binding                                                                 | 22 | 0.042  | 0.33  |
| GO:0016787 | molecular function | hydrolase activity                                                                 | 20 | 0.093  | 0.7   |
| GO:0046872 | molecular function | metal ion binding                                                                  | 16 | 0.5    | 1     |
| GO:0016818 | molecular function | hydrolase activity, acting on acid anhydrides, in phosphorus-containing anhydrides | 5  | 0.46   | 1     |

|            |                       |                                                        |    |      |   |
|------------|-----------------------|--------------------------------------------------------|----|------|---|
| GO:0016817 | molecular<br>function | hydrolase<br>activity, acting<br>on acid<br>anhydrides | 5  | 0.48 | 1 |
| GO:0050825 | molecular<br>function | ice binding                                            | 7  | 0.18 | 1 |
| GO:0005488 | molecular<br>function | binding                                                | 52 | 0.72 | 1 |
| GO:0003676 | molecular<br>function | nucleic acid<br>binding                                | 5  | 1    | 1 |
| GO:0017076 | molecular<br>function | purine<br>nucleotide<br>binding                        | 17 | 0.21 | 1 |
| GO:0005524 | molecular<br>function | ATP binding                                            | 11 | 0.57 | 1 |
| GO:0043169 | molecular<br>function | cation binding                                         | 16 | 0.51 | 1 |
| GO:0046914 | molecular<br>function | transition metal<br>ion binding                        | 9  | 0.9  | 1 |
| GO:0016462 | molecular<br>function | pyrophosphatas<br>e activity                           | 5  | 0.44 | 1 |
| GO:0032559 | molecular<br>function | adenyl<br>ribonucleotide<br>binding                    | 11 | 0.58 | 1 |

|            |                    |                                    |    |          |          |
|------------|--------------------|------------------------------------|----|----------|----------|
| GO:0032555 | molecular function | purine ribonucleotide binding      | 12 | 0.61     | 1        |
| GO:0032553 | molecular function | ribonucleotide binding             | 12 | 0.61     | 1        |
| GO:0043167 | molecular function | ion binding                        | 16 | 0.51     | 1        |
| GO:0030554 | molecular function | adenyl nucleotide binding          | 16 | 0.17     | 1        |
| GO:0050824 | molecular function | water binding                      | 7  | 0.18     | 1        |
| GO:0001883 | molecular function | purine nucleoside binding          | 16 | 0.17     | 1        |
| GO:0001882 | molecular function | nucleoside binding                 | 16 | 0.17     | 1        |
| GO:0017111 | molecular function | nucleoside-triphosphatase activity | 5  | 0.4      | 1        |
| GO:0009055 | molecular function | electron carrier activity          | 5  | 0.32     | 1        |
| GO:0005829 | cellular component | cytosol                            | 12 | 3.30E-15 | 1.30E-13 |
| GO:0044445 | cellular component | cytosolic part                     | 12 | 3.30E-15 | 1.30E-13 |

|            |                    |                                          |    |          |          |
|------------|--------------------|------------------------------------------|----|----------|----------|
| GO:0005945 | cellular component | 6-phosphofructokinase complex            | 9  | 1.00E-12 | 2.60E-11 |
| GO:0043234 | cellular component | protein complex                          | 18 | 5.30E-06 | 0.0001   |
| GO:0034357 | cellular component | photosynthetic membrane                  | 5  | 1.30E-05 | 0.0002   |
| GO:0009579 | cellular component | thylakoid                                | 5  | 2.00E-05 | 0.00026  |
| GO:0044444 | cellular component | cytoplasmic part                         | 15 | 0.00076  | 0.0074   |
| GO:0005737 | cellular component | cytoplasm                                | 18 | 0.00077  | 0.0074   |
| GO:0032991 | cellular component | macromolecular complex                   | 19 | 0.0018   | 0.016    |
| GO:0044424 | cellular component | intracellular part                       | 25 | 0.096    | 0.74     |
| GO:0016020 | cellular component | membrane                                 | 10 | 0.83     | 1        |
| GO:0043231 | cellular component | intracellular membrane-bounded organelle | 5  | 0.96     | 1        |
| GO:0044425 | cellular component | membrane part                            | 8  | 0.41     | 1        |
| GO:0043229 | cellular component | intracellular organelle                  | 9  | 0.94     | 1        |



|            |                       |                                   |    |      |   |
|------------|-----------------------|-----------------------------------|----|------|---|
| GO:0005622 | cellular<br>component | intracellular                     | 26 | 0.21 | 1 |
| GO:0043227 | cellular<br>component | membrane-<br>bounded<br>organelle | 6  | 0.92 | 1 |
| GO:0043226 | cellular<br>component | organelle                         | 9  | 0.94 | 1 |
| GO:0031224 | cellular<br>component | intrinsic to<br>membrane          | 6  | 0.5  | 1 |
| GO:0044464 | cellular<br>component | cell part                         | 30 | 0.66 | 1 |
| GO:0005623 | cellular<br>component | cell                              | 30 | 0.66 | 1 |
| GO:0016021 | cellular<br>component | integral to<br>membrane           | 6  | 0.49 | 1 |

---

Gene Ontology Slim term enrichment analysis.

---

## Gene IDs

---

// GRMZM2G033526 // GRMZM2G144002 // GRMZM2G008507 // GRMZM2G139360 // GRMZM2G063851 // GRMZM2G322953 // GRMZM2G415359 // GRMZM2G131539 // GRMZM2G008714 // GRMZM2G386337 // GRMZM2G017555 // GRMZM2G463871 // GRMZM2G018716 // GRMZM2G024993 // GRMZM2G051806 // AC205100.3\_FG001 // GRMZM2G171713 // GRMZM2G138468 // GRMZM2G174249 // GRMZM2G018692 // AC177946.2\_FG004 // GRMZM2G142863 // GRMZM2G080375 // GRMZM2G368388 // GRMZM2G035599 // GRMZM2G466833 // GRMZM2G033894 // GRMZM2G450125 // GRMZM2G011743 // GRMZM2G046911 // GRMZM2G401970 // GRMZM2G083102 // GRMZM2G121612 // GRMZM2G119941 // GRMZM2G409131 // GRMZM2G136139 // GRMZM2G169462 // GRMZM2G459828 // GRMZM2G050077 // GRMZM2G394450 // GRMZM2G171373 // GRMZM2G175218 // GRMZM2G481027

// GRMZM2G139360 // GRMZM2G415359 // GRMZM2G131539 // GRMZM2G171713 // GRMZM2G386337 // GRMZM2G017555 // GRMZM2G033526 // GRMZM2G051806 // AC205100.3\_FG001 // GRMZM2G008714 // AC177946.2\_FG004 // GRMZM2G142863 // GRMZM2G080375 // GRMZM2G035599 // GRMZM2G033894 // GRMZM2G450125 // GRMZM2G011743 // GRMZM2G046911 // GRMZM2G401970 // GRMZM2G409131 // GRMZM2G136139 // GRMZM2G459828 // GRMZM2G050077 // GRMZM2G171373 // GRMZM2G175218

// GRMZM2G144002 // GRMZM2G139360 // GRMZM2G415359 // GRMZM2G131539 // GRMZM2G171713 // GRMZM2G017555 // GRMZM2G033526 // GRMZM2G051806 // AC205100.3\_FG001 // GRMZM2G008714 // AC177946.2\_FG004 // GRMZM2G142863 // GRMZM2G080375 // GRMZM2G368388 // GRMZM2G035599 // GRMZM2G033894 // GRMZM2G011743 // GRMZM2G046911 // GRMZM2G401970 // GRMZM2G409131 // GRMZM2G459828 // GRMZM2G050077 // GRMZM2G171373 // GRMZM2G481027

// GRMZM2G370988 // GRMZM2G144002 // GRMZM2G139360 // GRMZM2G415359 // GRMZM2G131539 // GRMZM2G008714 // GRMZM2G017555 // GRMZM2G002304 // GRMZM2G033526 // GRMZM2G051806 // AC205100.3\_FG001 // GRMZM2G171713 // GRMZM2G043602 // AC177946.2\_FG004 // GRMZM2G142863 // GRMZM2G080375 // GRMZM2G368388 // GRMZM2G035599 // GRMZM2G033894 // GRMZM2G011743 // GRMZM2G046911 // GRMZM2G401970 // GRMZM2G409131 // GRMZM2G109743 // GRMZM2G099696 // GRMZM2G459828 // GRMZM2G050077 // GRMZM2G171373 // GRMZM2G481027

// GRMZM2G144002 // GRMZM2G139360 // GRMZM2G415359 // GRMZM2G131539 // GRMZM2G171713 // GRMZM2G017555 // GRMZM2G033526 // GRMZM2G051806 // AC205100.3\_FG001 // GRMZM2G008714 // AC177946.2\_FG004 // GRMZM2G142863 // GRMZM2G080375 // GRMZM2G368388 // GRMZM2G035599 // GRMZM2G033894 // GRMZM2G011743 // GRMZM2G046911 // GRMZM2G401970 // GRMZM2G409131 // GRMZM2G459828 // GRMZM2G050077 // GRMZM2G171373 // GRMZM2G481027

// GRMZM2G080375 // GRMZM2G033526 // GRMZM2G017555 // AC205100.3\_FG001 // GRMZM2G409131 // GRMZM2G401970 // GRMZM2G139360 // AC177946.2\_FG004 // GRMZM2G171713 // GRMZM2G142863 // GRMZM2G050077 // GRMZM2G051806 // GRMZM2G035599 // GRMZM2G171373 // GRMZM2G033894 // GRMZM2G011743 // GRMZM2G046911 // GRMZM2G459828 // GRMZM2G415359 // GRMZM2G131539 // GRMZM2G008714

// GRMZM2G080375 // GRMZM2G033526 // GRMZM2G017555 // AC205100.3\_FG001 // GRMZM2G409131 // GRMZM2G401970 // GRMZM2G139360 // AC177946.2\_FG004 // GRMZM2G171713 // GRMZM2G142863 // GRMZM2G050077 // GRMZM2G051806 // GRMZM2G035599 // GRMZM2G171373 // GRMZM2G033894 // GRMZM2G011743 // GRMZM2G046911 // GRMZM2G459828 // GRMZM2G415359 // GRMZM2G131539 // GRMZM2G008714

// GRMZM2G080375 // GRMZM2G033526 // GRMZM2G017555 // AC205100.3\_FG001 // GRMZM2G409131 // GRMZM2G401970 // GRMZM2G139360 // AC177946.2\_FG004 // GRMZM2G171713 // GRMZM2G142863 // GRMZM2G050077 // GRMZM2G051806 // GRMZM2G035599 // GRMZM2G171373 // GRMZM2G033894 // GRMZM2G011743 // GRMZM2G046911 // GRMZM2G459828 // GRMZM2G415359 // GRMZM2G131539 // GRMZM2G008714

// GRMZM2G144002 // GRMZM2G139360 // GRMZM2G063851 // GRMZM2G415359 // GRMZM2G131539 // GRMZM2G008714 // GRMZM2G017555 // GRMZM2G033526 // GRMZM2G051806 // AC205100.3\_FG001 // GRMZM2G171713 // GRMZM2G008507 // GRMZM2G024993 // AC177946.2\_FG004 // GRMZM2G142863 // GRMZM2G080375 // GRMZM2G368388 // GRMZM2G035599 // GRMZM2G033894 // GRMZM2G011743 // GRMZM2G046911 // GRMZM2G401970 // GRMZM2G121612 // GRMZM2G409131 // GRMZM2G459828 // GRMZM2G050077 // GRMZM2G171373 // GRMZM2G481027

// GRMZM2G144002 // GRMZM2G139360 // GRMZM2G415359 // GRMZM2G131539 // GRMZM2G171713 // GRMZM2G017555 // GRMZM2G033526 // GRMZM2G051806 // AC205100.3\_FG001 // GRMZM2G008714 // AC177946.2\_FG004 // GRMZM2G142863 // GRMZM2G080375 // GRMZM2G368388 // GRMZM2G035599 // GRMZM2G033894 // GRMZM2G011743 // GRMZM2G046911 // GRMZM2G401970 // GRMZM2G409131 // GRMZM2G459828 // GRMZM2G050077 // GRMZM2G171373 // GRMZM2G481027

// GRMZM2G409131 // GRMZM2G033526 // GRMZM2G017555 // AC205100.3\_FG001 // GRMZM2G401970 // GRMZM2G139360 // AC177946.2\_FG004 // GRMZM2G171713 // GRMZM2G142863 // GRMZM2G080375 // GRMZM2G051806 // GRMZM2G171373 // GRMZM2G033894 // GRMZM2G011743 // GRMZM2G046911 // GRMZM2G459828 // GRMZM2G415359 // GRMZM2G131539 // GRMZM2G008714

// GRMZM2G080375 // GRMZM2G033526 // GRMZM2G017555 // AC205100.3\_FG001 // GRMZM2G409131 // GRMZM2G401970 // GRMZM2G139360 // AC177946.2\_FG004 // GRMZM2G171713 // GRMZM2G142863 // GRMZM2G050077 // GRMZM2G051806 // GRMZM2G035599 // GRMZM2G171373 // GRMZM2G033894 // GRMZM2G011743 // GRMZM2G046911 // GRMZM2G459828 // GRMZM2G415359 // GRMZM2G131539 // GRMZM2G008714

// GRMZM2G080375 // GRMZM2G033526 // GRMZM2G017555 // AC205100.3\_FG001 // GRMZM2G409131 // GRMZM2G401970 // GRMZM2G139360 // AC177946.2\_FG004 // GRMZM2G171713 // GRMZM2G142863 // GRMZM2G050077 // GRMZM2G051806 // GRMZM2G035599 // GRMZM2G171373 // GRMZM2G033894 // GRMZM2G011743 // GRMZM2G046911 // GRMZM2G459828 // GRMZM2G415359 // GRMZM2G131539 // GRMZM2G008714

// GRMZM2G139360 // GRMZM2G415359 // GRMZM2G131539 // GRMZM2G171713 // GRMZM2G017555 // GRMZM2G033526 // GRMZM2G051806 // AC205100.3\_FG001 // GRMZM2G008714 // GRMZM2G079888 // AC177946.2\_FG004 // GRMZM2G142863 // GRMZM2G080375 // GRMZM2G035599 // GRMZM2G033894 // GRMZM2G011743 // GRMZM2G046911 // GRMZM2G401970 // GRMZM2G409131 // GRMZM2G459828 // GRMZM2G050077 // GRMZM2G171373 // GRMZM2G118345

// GRMZM2G080375 // GRMZM2G033526 // GRMZM2G017555 // AC205100.3\_FG001 // GRMZM2G409131 // GRMZM2G401970 // GRMZM2G139360 // AC177946.2\_FG004 // GRMZM2G171713 // GRMZM2G142863 // GRMZM2G050077 // GRMZM2G051806 // GRMZM2G035599 // GRMZM2G171373 // GRMZM2G033894 // GRMZM2G011743 // GRMZM2G046911 // GRMZM2G459828 // GRMZM2G415359 // GRMZM2G131539 // GRMZM2G008714

// GRMZM2G144002 // GRMZM2G139360 // GRMZM2G415359 // GRMZM2G131539 // GRMZM2G171713 // GRMZM2G017555 // GRMZM2G033526 // GRMZM2G051806 // AC205100.3\_FG001 // GRMZM2G008714 // GRMZM2G079888 // AC177946.2\_FG004 // GRMZM2G142863 // GRMZM2G080375 // GRMZM2G033894 // GRMZM2G011743 // GRMZM2G046911 // GRMZM2G401970 // GRMZM2G409131 // GRMZM2G459828 // GRMZM2G108467 // GRMZM2G171373

// GRMZM2G139360 // GRMZM2G415359 // GRMZM2G131539 // GRMZM2G008714 // GRMZM2G386337 // GRMZM2G017555 // GRMZM2G033526 // GRMZM2G051806 // AC205100.3\_FG001 // GRMZM2G171713 // GRMZM2G079888 // AC177946.2\_FG004 // GRMZM2G142863 // GRMZM2G080375 // GRMZM2G035599 // GRMZM2G033894 // GRMZM2G450125 // GRMZM2G011743 // GRMZM2G046911 // GRMZM2G401970 // GRMZM2G409131 // GRMZM2G136139 // GRMZM2G459828 // GRMZM2G050077 // GRMZM2G171373 // GRMZM2G118345 // GRMZM2G175218

// GRMZM2G370988 // GRMZM2G105644 // GRMZM2G079888 // GRMZM2G043602 // GRMZM2G099696 // GRMZM2G002304 // GRMZM2G377609 // GRMZM2G109743 // GRMZM2G035599 // GRMZM2G419806 // GRMZM2G043453 // GRMZM2G044074

// GRMZM2G139360 // GRMZM2G415359 // GRMZM2G131539 // GRMZM2G171713 // GRMZM2G386337 // GRMZM2G017555 // GRMZM2G033526 // GRMZM2G051806 // AC205100.3\_FG001 // GRMZM2G008714 // AC177946.2\_FG004 // GRMZM2G142863 // GRMZM2G080375 // GRMZM2G035599 // GRMZM2G033894 // GRMZM2G450125 // GRMZM2G011743 // GRMZM2G046911 // GRMZM2G401970 // GRMZM2G409131 // GRMZM2G136139 // GRMZM2G459828 // GRMZM2G050077 // GRMZM2G171373 // GRMZM2G175218

// GRMZM2G370988 // GRMZM2G105644 // GRMZM2G109743 // GRMZM2G099696 // GRMZM2G043602 // GRMZM2G002304 // GRMZM2G377609 // GRMZM2G419806 // GRMZM2G043453 // GRMZM2G044074

// GRMZM2G406672 // AC226723.2\_FG001 // GRMZM2G118770 // GRMZM2G415359 // GRMZM2G466833

// GRMZM2G105644 // GRMZM2G043453 // GRMZM2G377609 // GRMZM2G044074 // GRMZM2G419806

// GRMZM2G105644 // GRMZM2G104613 // GRMZM2G043453 // GRMZM2G085078 // GRMZM2G377609 // GRMZM2G035599 // GRMZM2G118345 // GRMZM2G143357 // GRMZM2G419806 // GRMZM2G044074 // GRMZM2G355906

// GRMZM2G105644 // GRMZM2G043453 // GRMZM2G377609 // GRMZM2G044074 // GRMZM2G419806

// GRMZM2G105644 // GRMZM2G043453 // GRMZM2G377609 // GRMZM2G044074 // GRMZM2G419806

// GRMZM2G105644 // GRMZM2G043453 // GRMZM2G377609 // GRMZM2G044074 // GRMZM2G419806

// GRMZM2G370988 // GRMZM2G002304 // GRMZM2G109743 // GRMZM2G043602 // GRMZM2G099696

// GRMZM2G370988 // GRMZM2G002304 // GRMZM2G109743 // GRMZM2G043602 // GRMZM2G099696

// GRMZM2G370988 // GRMZM2G002304 // GRMZM2G109743 // GRMZM2G043602 // GRMZM2G099696

// GRMZM2G370988 // GRMZM2G002304 // GRMZM2G109743 // GRMZM2G043602 // GRMZM2G099696

// GRMZM2G370988 // GRMZM2G002304 // GRMZM2G109743 // GRMZM2G043602 // GRMZM2G099696

// GRMZM2G370988 // GRMZM2G002304 // GRMZM2G109743 // GRMZM2G043602 // GRMZM2G099696

// GRMZM2G370988 // GRMZM2G002304 // GRMZM2G109743 // GRMZM2G043602 // GRMZM2G099696

// GRMZM2G370988 // GRMZM2G002304 // GRMZM2G109743 // GRMZM2G043602 // GRMZM2G099696

// GRMZM2G370988 // GRMZM2G002304 // GRMZM2G109743 // GRMZM2G043602 // GRMZM2G099696

// GRMZM2G105644 // GRMZM2G043453 // GRMZM2G134130 // GRMZM2G108467 // GRMZM2G419806 // GRMZM2G472852

// GRMZM2G406672 // AC226723.2\_FG001 // GRMZM2G118770 // GRMZM2G415359 // GRMZM2G466833

// GRMZM2G370988 // GRMZM2G002304 // GRMZM2G109743 // GRMZM2G043602 // GRMZM2G099696

// GRMZM2G105644 // GRMZM2G104613 // GRMZM2G043453 // GRMZM2G085078 // GRMZM2G377609 // GRMZM2G143357 // GRMZM2G419806 // GRMZM2G044074

// GRMZM2G105644 // GRMZM2G043453 // GRMZM2G377609 // GRMZM2G044074 // GRMZM2G419806

// GRMZM2G386337 // GRMZM2G136139 // GRMZM2G144002 // GRMZM2G024993 // GRMZM2G450125 // GRMZM2G175218 // GRMZM2G121612

// GRMZM2G370988 // GRMZM2G002304 // GRMZM2G109743 // GRMZM2G043602 // GRMZM2G099696

// GRMZM2G118770 // GRMZM2G043602 // GRMZM2G104613 // GRMZM2G099696 // GRMZM2G406672 // GRMZM2G085078 // AC226723.2\_FG001 // GRMZM2G466833 // GRMZM2G118345 // GRMZM2G143357 // GRMZM2G415359 // GRMZM2G355906

// GRMZM2G118770 // GRMZM2G043602 // GRMZM2G104613 // GRMZM2G099696 // GRMZM2G406672 // GRMZM2G085078 // AC226723.2\_FG001 // GRMZM2G466833 // GRMZM2G118345 // GRMZM2G143357 // GRMZM2G415359 // GRMZM2G355906

// GRMZM2G118770 // GRMZM2G043602 // GRMZM2G104613 // GRMZM2G099696 // GRMZM2G406672 // GRMZM2G085078 // AC226723.2\_FG001 // GRMZM2G466833 // GRMZM2G118345 // GRMZM2G143357 // GRMZM2G415359 // GRMZM2G355906

// GRMZM2G118770 // GRMZM2G043602 // GRMZM2G104613 // GRMZM2G099696 // GRMZM2G406672 // GRMZM2G085078 // AC226723.2\_FG001 // GRMZM2G466833 // GRMZM2G118345 // GRMZM2G143357 // GRMZM2G415359 // GRMZM2G355906

// GRMZM2G370988 // GRMZM2G033526 // GRMZM2G144002 // GRMZM2G105644 // GRMZM2G406672 // GRMZM2G139360 // GRMZM2G085078 // GRMZM2G134130 // GRMZM2G377609 // GRMZM2G063851 // GRMZM2G322953 // GRMZM2G415359 // GRMZM2G131539 // GRMZM2G044074 // GRMZM2G355906 // GRMZM2G386337 // GRMZM2G058702 // GRMZM2G017555 // GRMZM2G043602 // GRMZM2G463871 // GRMZM2G448344 // GRMZM2G428027 // GRMZM2G002304 // GRMZM2G053958 // GRMZM2G305211 // GRMZM2G018716 // GRMZM2G024993 // GRMZM2G051806 // GRMZM2G072054 // AC205100.3\_FG001 // GRMZM2G143357 // GRMZM2G008714 // GRMZM2G017257 // GRMZM2G472852 // GRMZM2G138468 // GRMZM2G011743 // GRMZM2G079888 // GRMZM2G171713 // GRMZM2G104613 // GRMZM2G054361 // GRMZM2G174249 // GRMZM2G018692 // AC177946.2\_FG004 // GRMZM2G097457 // GRMZM2G142863 // GRMZM2G080375 // GRMZM2G119941 // GRMZM2G118770 // GRMZM2G035599 // GRMZM2G466833 // GRMZM2G033894 // GRMZM2G165176 // GRMZM2G450125 // GRMZM2G059361 // GRMZM2G046911 // GRMZM2G401970 // GRMZM2G083102 // GRMZM2G121612 // GRMZM2G140101 // GRMZM2G409131 // GRMZM2G109743 // GRMZM2G136139 // GRMZM2G099696 // GRMZM2G169462 // GRMZM2G122563 // GRMZM2G043453 // AC226723.2\_FG001 // GRMZM2G459828 // GRMZM2G050077 // GRMZM2G108467 // GRMZM2G368388 // GRMZM2G394450 // GRMZM2G171373 // GRMZM2G118345 // GRMZM2G175218 // GRMZM2G419806 // GRMZM2G481027 // GRMZM2G008507

// GRMZM2G370988 // GRMZM2G109743 // GRMZM2G099696 // GRMZM2G043602 // GRMZM2G002304 // GRMZM2G118345

// GRMZM2G079888 // GRMZM2G406672 // GRMZM2G108467 // GRMZM2G118770 // GRMZM2G033894 // GRMZM2G428027

// GRMZM2G370988 // GRMZM2G144002 // GRMZM2G008507 // GRMZM2G406672 // GRMZM2G139360 // GRMZM2G085078 // GRMZM2G134130 // GRMZM2G377609 // GRMZM2G063851 // GRMZM2G428027 // GRMZM2G131539 // GRMZM2G044074 // GRMZM2G008714 // GRMZM2G118770 // GRMZM2G017555 // GRMZM2G043602 // GRMZM2G415359 // GRMZM2G002304 // GRMZM2G033526 // GRMZM2G051806 // AC205100.3\_FG001 // GRMZM2G143357 // GRMZM2G355906 // GRMZM2G472852 // GRMZM2G105644 // GRMZM2G079888 // GRMZM2G171713 // GRMZM2G104613 // GRMZM2G024993 // AC177946.2\_FG004 // GRMZM2G097457 // GRMZM2G142863 // GRMZM2G080375 // GRMZM2G368388 // GRMZM2G035599 // GRMZM2G466833 // GRMZM2G033894 // GRMZM2G011743 // GRMZM2G046911 // GRMZM2G401970 // GRMZM2G121612 // GRMZM2G409131 // GRMZM2G109743 // GRMZM2G099696 // GRMZM2G043453 // GRMZM2G459828 // GRMZM2G050077 // GRMZM2G108467 // GRMZM2G171373 // GRMZM2G118345 // AC226723.2\_FG001 // GRMZM2G419806 // GRMZM2G481027

// GRMZM2G099696 // GRMZM2G143357 // GRMZM2G043602 // GRMZM2G085078 // GRMZM2G104613

// GRMZM2G099696 // GRMZM2G143357 // GRMZM2G043602 // GRMZM2G085078 // GRMZM2G104613

// GRMZM2G033526 // GRMZM2G144002 // GRMZM2G008507 // GRMZM2G139360 // GRMZM2G085078 // GRMZM2G063851 // GRMZM2G322953 // GRMZM2G428027 // GRMZM2G131539 // GRMZM2G008714 // GRMZM2G386337 // GRMZM2G017555 // GRMZM2G043602 // GRMZM2G463871 // GRMZM2G415359 // GRMZM2G018716 // GRMZM2G024993 // GRMZM2G051806 // AC205100.3\_FG001 // GRMZM2G143357 // GRMZM2G355906 // GRMZM2G138468 // GRMZM2G171713 // GRMZM2G104613 // GRMZM2G174249 // GRMZM2G018692 // AC177946.2\_FG004 // GRMZM2G142863 // GRMZM2G080375 // GRMZM2G368388 // GRMZM2G035599 // GRMZM2G466833 // GRMZM2G033894 // GRMZM2G450125 // GRMZM2G011743 // GRMZM2G046911 // GRMZM2G401970 // GRMZM2G083102 // GRMZM2G121612 // GRMZM2G119941 // GRMZM2G409131 // GRMZM2G109743 // GRMZM2G136139 // GRMZM2G099696 // GRMZM2G043453 // GRMZM2G169462 // GRMZM2G459828 // GRMZM2G050077 // GRMZM2G394450 // GRMZM2G171373 // GRMZM2G118345 // GRMZM2G175218 // GRMZM2G419806 // GRMZM2G481027

// GRMZM2G136139 // GRMZM2G104613 // GRMZM2G085078 // GRMZM2G118345 // GRMZM2G143357 // GRMZM2G355906

// GRMZM2G143357 // GRMZM2G118345 // GRMZM2G085078 // GRMZM2G104613 // GRMZM2G355906

// GRMZM2G143357 // GRMZM2G118345 // GRMZM2G085078 // GRMZM2G104613 // GRMZM2G355906

// GRMZM2G105644 // GRMZM2G043453 // GRMZM2G377609 // GRMZM2G044074 // GRMZM2G419806

// GRMZM2G143357 // GRMZM2G118345 // GRMZM2G085078 // GRMZM2G104613 // GRMZM2G355906

// GRMZM2G370988 // GRMZM2G144002 // GRMZM2G008507 // GRMZM2G406672 // GRMZM2G139360 // GRMZM2G085078 // GRMZM2G134130 // GRMZM2G377609 // GRMZM2G063851 // GRMZM2G428027 // GRMZM2G131539 // GRMZM2G044074 // GRMZM2G008714 // GRMZM2G118770 // GRMZM2G017555 // GRMZM2G043602 // GRMZM2G415359 // GRMZM2G002304 // GRMZM2G033526 // GRMZM2G051806 // AC205100.3\_FG001 // GRMZM2G143357 // GRMZM2G355906 // GRMZM2G017257 // GRMZM2G472852 // GRMZM2G105644 // GRMZM2G079888 // GRMZM2G171713 // GRMZM2G104613 // GRMZM2G024993 // AC177946.2\_FG004 // GRMZM2G097457 // GRMZM2G142863 // GRMZM2G080375 // GRMZM2G368388 // GRMZM2G035599 // GRMZM2G466833 // GRMZM2G033894 // GRMZM2G011743 // GRMZM2G046911 // GRMZM2G401970 // GRMZM2G121612 // GRMZM2G409131 // GRMZM2G109743 // GRMZM2G099696 // GRMZM2G043453 // GRMZM2G459828 // GRMZM2G050077 // GRMZM2G108467 // GRMZM2G171373 // GRMZM2G118345 // AC226723.2\_FG001 // GRMZM2G419806 // GRMZM2G481027



// GRMZM2G144002 // GRMZM2G099696 // AC177946.2\_FG004 // GRMZM2G134130 // GRMZM2G180335 // GRMZM2G450125 // GRMZM2G143357

// GRMZM2G105644 // GRMZM2G136139 // GRMZM2G104613 // GRMZM2G043453 // GRMZM2G377609 // GRMZM2G085078 // GRMZM2G368388 // GRMZM2G035599 // GRMZM2G118345 // GRMZM2G143357 // GRMZM2G419806 // GRMZM2G428027 // GRMZM2G044074 // GRMZM2G355906

// GRMZM2G144002 // GRMZM2G099696 // GRMZM2G024993 // GRMZM2G043453 // GRMZM2G368388 // GRMZM2G419806 // GRMZM2G428027 // GRMZM2G131539 // GRMZM2G121612

// GRMZM2G144002 // GRMZM2G099696 // AC177946.2\_FG004 // GRMZM2G134130 // GRMZM2G180335 // GRMZM2G450125 // GRMZM2G143357

// GRMZM2G428027 // GRMZM2G043453 // GRMZM2G368388 // GRMZM2G035599 // GRMZM2G419806

// GRMZM2G144002 // GRMZM2G139360 // GRMZM2G428027 // GRMZM2G131539 // GRMZM2G008714 // GRMZM2G017555 // GRMZM2G415359 // GRMZM2G033526 // GRMZM2G051806 // AC205100.3\_FG001 // GRMZM2G171713 // GRMZM2G024993 // AC177946.2\_FG004 // GRMZM2G142863 // GRMZM2G080375 // GRMZM2G368388 // GRMZM2G035599 // GRMZM2G033894 // GRMZM2G011743 // GRMZM2G046911 // GRMZM2G401970 // GRMZM2G121612 // GRMZM2G409131 // GRMZM2G099696 // GRMZM2G043453 // GRMZM2G459828 // GRMZM2G050077 // GRMZM2G171373 // GRMZM2G419806

// GRMZM2G017555 // GRMZM2G144002 // GRMZM2G099696 // AC177946.2\_FG004 // GRMZM2G134130 // GRMZM2G368388 // GRMZM2G180335 // GRMZM2G450125 // GRMZM2G143357

// GRMZM2G144002 // GRMZM2G099696 // AC177946.2\_FG004 // GRMZM2G134130 // GRMZM2G180335 // GRMZM2G450125 // GRMZM2G143357

// GRMZM2G144002 // GRMZM2G099696 // AC177946.2\_FG004 // GRMZM2G134130 // GRMZM2G180335 // GRMZM2G450125 // GRMZM2G143357

// GRMZM2G144002 // GRMZM2G099696 // AC177946.2\_FG004 // GRMZM2G134130 // GRMZM2G180335 // GRMZM2G450125 // GRMZM2G143357

// GRMZM2G370988 // GRMZM2G144002 // GRMZM2G008507 // GRMZM2G085078 // GRMZM2G377609 // GRMZM2G428027 // GRMZM2G131539 // GRMZM2G044074 // GRMZM2G043602 // GRMZM2G002304 // GRMZM2G054361 // GRMZM2G105644 // GRMZM2G104613 // GRMZM2G024993 // GRMZM2G368388 // GRMZM2G143357 // GRMZM2G121612 // GRMZM2G109743 // GRMZM2G099696 // GRMZM2G043453 // GRMZM2G118345 // GRMZM2G419806

// GRMZM2G144002 // GRMZM2G099696 // AC177946.2\_FG004 // GRMZM2G134130 // GRMZM2G180335 // GRMZM2G450125 // GRMZM2G143357

// GRMZM2G144002 // GRMZM2G099696 // GRMZM2G024993 // GRMZM2G043453 // GRMZM2G368388 // GRMZM2G419806 // GRMZM2G428027 // GRMZM2G131539 // GRMZM2G121612

// GRMZM2G144002 // GRMZM2G099696 // AC177946.2\_FG004 // GRMZM2G134130 // GRMZM2G180335 // GRMZM2G450125 // GRMZM2G143357

// GRMZM2G144002 // GRMZM2G099696 // AC177946.2\_FG004 // GRMZM2G134130 // GRMZM2G180335 // GRMZM2G450125 // GRMZM2G143357

// GRMZM2G144002 // GRMZM2G099696 // AC177946.2\_FG004 // GRMZM2G134130 // GRMZM2G180335 // GRMZM2G450125 // GRMZM2G143357

// GRMZM2G144002 // GRMZM2G099696 // AC177946.2\_FG004 // GRMZM2G134130 // GRMZM2G180335 // GRMZM2G450125 // GRMZM2G143357

// GRMZM2G018716 // GRMZM2G368388 // GRMZM2G109743 // GRMZM2G131539 // GRMZM2G099696

// GRMZM2G144002 // GRMZM2G099696 // AC177946.2\_FG004 // GRMZM2G134130 // GRMZM2G180335 // GRMZM2G450125 // GRMZM2G143357

// GRMZM2G033526 // GRMZM2G144002 // GRMZM2G139360 // GRMZM2G428027 // GRMZM2G131539 // GRMZM2G008714 // GRMZM2G386337 // GRMZM2G017555 // GRMZM2G415359 // GRMZM2G018716 // GRMZM2G051806 // AC205100.3\_FG001 // GRMZM2G171713 // GRMZM2G024993 // AC177946.2\_FG004 // GRMZM2G142863 // GRMZM2G080375 // GRMZM2G368388 // GRMZM2G035599 // GRMZM2G033894 // GRMZM2G450125 // GRMZM2G011743 // GRMZM2G046911 // GRMZM2G401970 // GRMZM2G121612 // GRMZM2G409131 // GRMZM2G109743 // GRMZM2G136139 // GRMZM2G099696 // GRMZM2G043453 // GRMZM2G459828 // GRMZM2G050077 // GRMZM2G171373 // GRMZM2G175218 // GRMZM2G419806

// GRMZM2G370988 // GRMZM2G105644 // GRMZM2G109743 // GRMZM2G099696 // GRMZM2G104613 // GRMZM2G144002 // GRMZM2G024993 // GRMZM2G002304 // GRMZM2G377609 // GRMZM2G085078 // GRMZM2G131539 // GRMZM2G368388 // GRMZM2G044074 // GRMZM2G043602 // GRMZM2G143357 // GRMZM2G419806 // GRMZM2G428027 // GRMZM2G043453 // GRMZM2G121612

// GRMZM2G409131 // GRMZM2G017555 // GRMZM2G139360 // GRMZM2G459828 // GRMZM2G080375 // GRMZM2G051806 // GRMZM2G171373 // AC205100.3\_FG001 // GRMZM2G011743 // GRMZM2G401970 // GRMZM2G171713

// GRMZM2G409131 // GRMZM2G017555 // GRMZM2G139360 // GRMZM2G459828 // GRMZM2G080375 // AC205100.3\_FG001 // GRMZM2G011743 // GRMZM2G401970 // GRMZM2G171713

// GRMZM2G409131 // GRMZM2G017555 // GRMZM2G139360 // GRMZM2G459828 // GRMZM2G080375 // AC205100.3\_FG001 // GRMZM2G011743 // GRMZM2G401970 // GRMZM2G171713

// GRMZM2G140101 // GRMZM2G121878 // GRMZM2G348512 // GRMZM2G448344 // AC177946.2\_FG004 // GRMZM2G131539 // GRMZM2G122563 // GRMZM2G377609 // GRMZM2G118345 // GRMZM2G046911 // GRMZM2G038821 // GRMZM2G054361 // GRMZM2G044074 // GRMZM2G355906

// GRMZM2G370988 // GRMZM2G079888 // GRMZM2G043602 // GRMZM2G099696 // GRMZM2G054361 // GRMZM2G406672 // GRMZM2G368388 // GRMZM2G058760 // GRMZM2G085078 // GRMZM2G142863 // GRMZM2G118770 // GRMZM2G143357 // GRMZM2G038821 // GRMZM2G428027 // GRMZM2G481027 // GRMZM2G093900 // GRMZM2G355906

// GRMZM2G370988 // GRMZM2G079888 // GRMZM2G043602 // GRMZM2G099696 // GRMZM2G406672 // GRMZM2G368388 // GRMZM2G058760 // GRMZM2G085078 // GRMZM2G142863 // GRMZM2G118770 // GRMZM2G143357 // GRMZM2G038821 // GRMZM2G428027 // GRMZM2G481027

// GRMZM2G118770 // GRMZM2G043602 // GRMZM2G104613 // GRMZM2G099696 // GRMZM2G406672 // GRMZM2G002304 // AC226723.2\_FG001 // GRMZM2G466833 // GRMZM2G059361 // GRMZM2G109743 // GRMZM2G415359

// GRMZM2G118770 // GRMZM2G043602 // GRMZM2G104613 // GRMZM2G099696 // GRMZM2G406672 // GRMZM2G002304 // GRMZM2G109743 // GRMZM2G466833 // GRMZM2G059361 // GRMZM2G415359

// GRMZM2G406672 // AC226723.2\_FG001 // GRMZM2G118770 // GRMZM2G415359 // GRMZM2G466833

// GRMZM2G140101 // GRMZM2G448344 // GRMZM2G122563 // GRMZM2G377609 // GRMZM2G038821 // GRMZM2G044074 // GRMZM2G355906

// GRMZM2G059361 // GRMZM2G002304 // GRMZM2G109743 // GRMZM2G043602 // GRMZM2G099696

// GRMZM2G118770 // GRMZM2G099696 // GRMZM2G043602 // GRMZM2G406672 // GRMZM2G368388 // GRMZM2G481027

// GRMZM2G370988 // GRMZM2G121878 // GRMZM2G033526 // GRMZM2G144002 // GRMZM2G105644 // GRMZM2G406672 // GRMZM2G139360 // GRMZM2G085078 // GRMZM2G169462 // GRMZM2G377609 // GRMZM2G063851 // GRMZM2G322953 // GRMZM2G038821 // GRMZM2G415359 // GRMZM2G131539 // GRMZM2G044074 // GRMZM2G355906 // GRMZM2G386337 // GRMZM2G058702 // GRMZM2G017555 // GRMZM2G043602 // GRMZM2G463871 // GRMZM2G448344 // GRMZM2G428027 // GRMZM2G002304 // GRMZM2G058760 // GRMZM2G053958 // GRMZM2G079381 // GRMZM2G305211 // GRMZM2G018716 // GRMZM2G024993 // GRMZM2G051806 // GRMZM2G072054 // AC205100.3\_FG001 // GRMZM2G143357 // GRMZM2G008714 // GRMZM2G017257 // GRMZM2G093900 // GRMZM2G138468 // GRMZM2G011743 // GRMZM2G079888 // GRMZM2G171713 // GRMZM2G104613 // GRMZM2G054361 // GRMZM2G174249 // GRMZM2G018692 // GRMZM2G180335 // AC177946.2\_FG004 // GRMZM2G097457 // GRMZM2G142863 // GRMZM2G080375 // GRMZM2G119941 // GRMZM2G118770 // GRMZM2G035599 // GRMZM2G466833 // GRMZM2G033894 // GRMZM2G165176 // GRMZM2G450125 // GRMZM2G059361 // GRMZM2G046911 // GRMZM2G401970 // GRMZM2G083102 // GRMZM2G121612 // GRMZM2G140101 // GRMZM2G409131 // GRMZM2G348512 // GRMZM2G109743 // GRMZM2G136139 // GRMZM2G099696 // GRMZM2G122563 // GRMZM2G043453 // AC226723.2\_FG001 // GRMZM2G459828 // GRMZM2G050077 // GRMZM2G368388 // GRMZM2G394450 // GRMZM2G171373 // GRMZM2G118345 // GRMZM2G175218 // GRMZM2G419806 // GRMZM2G481027 // GRMZM2G008507

// GRMZM2G140101 // GRMZM2G448344 // GRMZM2G122563 // GRMZM2G377609 // GRMZM2G038821 // GRMZM2G044074 // GRMZM2G355906

// GRMZM2G138468 // GRMZM2G136139 // GRMZM2G386337 // GRMZM2G174249 // GRMZM2G018692 // GRMZM2G018716 // GRMZM2G394450 // GRMZM2G450125 // GRMZM2G175218 // GRMZM2G119941 // GRMZM2G463871

// GRMZM2G138468 // GRMZM2G136139 // GRMZM2G386337 // GRMZM2G174249 // GRMZM2G018692 // GRMZM2G018716 // GRMZM2G394450 // GRMZM2G450125 // GRMZM2G175218 // GRMZM2G119941 // GRMZM2G463871

// GRMZM2G370988 // GRMZM2G079888 // GRMZM2G099696 // GRMZM2G043602 // GRMZM2G002304 // GRMZM2G109743

// GRMZM2G121878 // GRMZM2G046911 // AC177946.2\_FG004 // GRMZM2G348512 // GRMZM2G131539

// GRMZM2G370988 // GRMZM2G002304 // GRMZM2G109743 // GRMZM2G043602 // GRMZM2G099696

// GRMZM2G370988 // GRMZM2G002304 // GRMZM2G109743 // GRMZM2G043602 // GRMZM2G099696

// GRMZM2G370988 // GRMZM2G406672 // GRMZM2G085078 // GRMZM2G059361 // GRMZM2G428027 // GRMZM2G118770 //  
GRMZM2G104613 // GRMZM2G415359 // GRMZM2G002304 // GRMZM2G058760 // GRMZM2G053958 // AC226723.2\_FG001 //  
GRMZM2G105644 // GRMZM2G079888 // GRMZM2G043602 // GRMZM2G142863 // GRMZM2G368388 // GRMZM2G466833 //  
GRMZM2G033894 // GRMZM2G079381 // GRMZM2G109743 // GRMZM2G099696 // GRMZM2G481027

// GRMZM2G121878 // GRMZM2G046911 // AC177946.2\_FG004 // GRMZM2G348512 // GRMZM2G131539

// GRMZM2G142863 // GRMZM2G054361 // GRMZM2G038821 // GRMZM2G143357 // GRMZM2G093900 // GRMZM2G355906

// GRMZM2G144002 // GRMZM2G139360 // GRMZM2G063851 // GRMZM2G008714 // GRMZM2G058702 // GRMZM2G017555 //  
GRMZM2G097457 // GRMZM2G033526 // GRMZM2G051806 // GRMZM2G072054 // AC205100.3\_FG001 // GRMZM2G143357 //  
GRMZM2G171713 // GRMZM2G093900 // GRMZM2G008507 // GRMZM2G043602 // GRMZM2G024993 // GRMZM2G080375 //  
GRMZM2G368388 // GRMZM2G165176 // GRMZM2G011743 // GRMZM2G401970 // GRMZM2G054361 // GRMZM2G121612 //  
GRMZM2G409131 // GRMZM2G099696 // GRMZM2G169462 // GRMZM2G459828 // GRMZM2G171373

// GRMZM2G079888 // GRMZM2G058760 // GRMZM2G428027 // GRMZM2G085078 // GRMZM2G143357

// GRMZM2G058702 // GRMZM2G043602 // GRMZM2G099696 // GRMZM2G072054 // GRMZM2G063851 // GRMZM2G165176

// GRMZM2G409131 // GRMZM2G033526 // GRMZM2G017555 // GRMZM2G097457 // GRMZM2G139360 // GRMZM2G368388 // GRMZM2G169462 // GRMZM2G459828 // GRMZM2G080375 // GRMZM2G051806 // GRMZM2G171373 // AC205100.3\_FG001 // GRMZM2G011743 // GRMZM2G171713 // GRMZM2G401970 // GRMZM2G008714

// GRMZM2G409131 // GRMZM2G033526 // GRMZM2G017555 // GRMZM2G139360 // GRMZM2G368388 // GRMZM2G169462 // GRMZM2G459828 // GRMZM2G080375 // GRMZM2G051806 // GRMZM2G171373 // AC205100.3\_FG001 // GRMZM2G011743 // GRMZM2G171713 // GRMZM2G401970 // GRMZM2G008714

// GRMZM2G409131 // GRMZM2G033526 // GRMZM2G017555 // GRMZM2G097457 // GRMZM2G144002 // GRMZM2G139360 // GRMZM2G368388 // GRMZM2G169462 // GRMZM2G459828 // GRMZM2G080375 // GRMZM2G051806 // GRMZM2G171373 // AC205100.3\_FG001 // GRMZM2G011743 // GRMZM2G171713 // GRMZM2G401970 // GRMZM2G008714

// GRMZM2G050077 // GRMZM2G017257 // GRMZM2G035599 // GRMZM2G083102 // GRMZM2G305211

// GRMZM2G406672 // GRMZM2G139360 // GRMZM2G085078 // GRMZM2G428027 // GRMZM2G097457 // GRMZM2G017257 // GRMZM2G058760 // GRMZM2G051806 // GRMZM2G143357 // GRMZM2G079888 // GRMZM2G043602 // GRMZM2G080375 // GRMZM2G368388 // GRMZM2G118770 // GRMZM2G401970 // GRMZM2G099696 // GRMZM2G043453 // GRMZM2G169462 // GRMZM2G171373 // GRMZM2G180335 // GRMZM2G419806 // GRMZM2G481027

// GRMZM2G138468 // GRMZM2G011743 // GRMZM2G109743 // GRMZM2G136139 // GRMZM2G386337 // GRMZM2G174249 // GRMZM2G017257 // GRMZM2G043453 // GRMZM2G180335 // GRMZM2G169462 // GRMZM2G018716 // GRMZM2G394450 // GRMZM2G322953 // GRMZM2G450125 // GRMZM2G175218 // GRMZM2G119941 // GRMZM2G017555 // GRMZM2G463871 // GRMZM2G018692 // GRMZM2G419806

// GRMZM2G121878 // GRMZM2G138468 // GRMZM2G348512 // GRMZM2G050939 // GRMZM2G406672 // GRMZM2G085078 // GRMZM2G134130 // GRMZM2G050077 // GRMZM2G108467 // GRMZM2G033526 // GRMZM2G118770 // GRMZM2G079381 // GRMZM2G143357 // GRMZM2G038821 // GRMZM2G428027 // GRMZM2G008714

// GRMZM2G017257 // GRMZM2G043453 // GRMZM2G419806 // GRMZM2G169462 // GRMZM2G180335

// GRMZM2G017257 // GRMZM2G043453 // GRMZM2G419806 // GRMZM2G169462 // GRMZM2G180335

// GRMZM2G144002 // GRMZM2G099696 // AC177946.2\_FG004 // GRMZM2G134130 // GRMZM2G180335 // GRMZM2G450125 // GRMZM2G143357

// GRMZM2G370988 // GRMZM2G121878 // GRMZM2G144002 // GRMZM2G406672 // GRMZM2G139360 // GRMZM2G085078 // GRMZM2G134130 // GRMZM2G079381 // GRMZM2G038821 // GRMZM2G428027 // GRMZM2G088114 // GRMZM2G008714 // GRMZM2G058702 // GRMZM2G097457 // GRMZM2G415359 // GRMZM2G002304 // GRMZM2G058760 // GRMZM2G109743 // GRMZM2G053958 // GRMZM2G305211 // GRMZM2G033526 // GRMZM2G051806 // GRMZM2G072054 // GRMZM2G143357 // GRMZM2G355906 // GRMZM2G093900 // GRMZM2G138468 // GRMZM2G079888 // GRMZM2G043602 // GRMZM2G180335 // AC177946.2\_FG004 // GRMZM2G142863 // GRMZM2G080375 // GRMZM2G050939 // GRMZM2G466833 // GRMZM2G165176 // GRMZM2G450125 // GRMZM2G059361 // GRMZM2G401970 // GRMZM2G054361 // GRMZM2G348512 // GRMZM2G118770 // GRMZM2G099696 // GRMZM2G043453 // GRMZM2G169462 // GRMZM2G050077 // GRMZM2G108467 // GRMZM2G368388 // GRMZM2G171373 // GRMZM2G017257 // GRMZM2G419806 // GRMZM2G481027

// GRMZM2G043453 // GRMZM2G368388 // GRMZM2G428027 // GRMZM2G088114 // GRMZM2G419806

// GRMZM2G079888 // GRMZM2G097457 // GRMZM2G401970 // GRMZM2G139360 // GRMZM2G368388 // GRMZM2G058760 // GRMZM2G085078 // GRMZM2G169462 // GRMZM2G080375 // GRMZM2G051806 // GRMZM2G171373 // GRMZM2G017257 // GRMZM2G180335 // GRMZM2G143357 // GRMZM2G419806 // GRMZM2G428027 // GRMZM2G043453

// GRMZM2G051806 // GRMZM2G097457 // GRMZM2G139360 // GRMZM2G043453 // GRMZM2G169462 // GRMZM2G080375 // GRMZM2G368388 // GRMZM2G171373 // GRMZM2G017257 // GRMZM2G419806 // GRMZM2G401970

// GRMZM2G121878 // GRMZM2G138468 // GRMZM2G348512 // GRMZM2G050939 // GRMZM2G406672 // GRMZM2G085078 // GRMZM2G134130 // GRMZM2G050077 // GRMZM2G108467 // GRMZM2G033526 // GRMZM2G118770 // GRMZM2G079381 // GRMZM2G143357 // GRMZM2G038821 // GRMZM2G428027 // GRMZM2G008714

// GRMZM2G121878 // GRMZM2G348512 // GRMZM2G050939 // GRMZM2G085078 // GRMZM2G134130 // GRMZM2G050077 // GRMZM2G108467 // GRMZM2G079381 // GRMZM2G428027

// GRMZM2G017257 // GRMZM2G043453 // GRMZM2G419806 // GRMZM2G169462 // GRMZM2G180335

// GRMZM2G051806 // GRMZM2G097457 // GRMZM2G139360 // GRMZM2G043453 // GRMZM2G169462 // GRMZM2G080375 // GRMZM2G368388 // GRMZM2G171373 // GRMZM2G017257 // GRMZM2G419806 // GRMZM2G401970

// GRMZM2G051806 // GRMZM2G097457 // GRMZM2G139360 // GRMZM2G043453 // GRMZM2G180335 // GRMZM2G169462 // GRMZM2G080375 // GRMZM2G368388 // GRMZM2G171373 // GRMZM2G017257 // GRMZM2G419806 // GRMZM2G401970

// GRMZM2G051806 // GRMZM2G097457 // GRMZM2G139360 // GRMZM2G043453 // GRMZM2G180335 // GRMZM2G169462 // GRMZM2G080375 // GRMZM2G368388 // GRMZM2G171373 // GRMZM2G017257 // GRMZM2G419806 // GRMZM2G401970

// GRMZM2G121878 // GRMZM2G138468 // GRMZM2G348512 // GRMZM2G050939 // GRMZM2G406672 // GRMZM2G085078 // GRMZM2G134130 // GRMZM2G050077 // GRMZM2G108467 // GRMZM2G033526 // GRMZM2G118770 // GRMZM2G079381 // GRMZM2G143357 // GRMZM2G038821 // GRMZM2G428027 // GRMZM2G008714

// GRMZM2G079888 // GRMZM2G097457 // GRMZM2G401970 // GRMZM2G139360 // GRMZM2G368388 // GRMZM2G058760 // GRMZM2G085078 // GRMZM2G169462 // GRMZM2G080375 // GRMZM2G051806 // GRMZM2G171373 // GRMZM2G017257 // GRMZM2G143357 // GRMZM2G419806 // GRMZM2G428027 // GRMZM2G043453

// GRMZM2G144002 // GRMZM2G099696 // AC177946.2\_FG004 // GRMZM2G134130 // GRMZM2G180335 // GRMZM2G450125 // GRMZM2G143357

// GRMZM2G079888 // GRMZM2G097457 // GRMZM2G401970 // GRMZM2G139360 // GRMZM2G368388 // GRMZM2G058760 // GRMZM2G085078 // GRMZM2G169462 // GRMZM2G080375 // GRMZM2G051806 // GRMZM2G171373 // GRMZM2G017257 // GRMZM2G143357 // GRMZM2G419806 // GRMZM2G428027 // GRMZM2G043453

// GRMZM2G079888 // GRMZM2G097457 // GRMZM2G401970 // GRMZM2G139360 // GRMZM2G368388 // GRMZM2G058760 // GRMZM2G085078 // GRMZM2G169462 // GRMZM2G080375 // GRMZM2G051806 // GRMZM2G171373 // GRMZM2G017257 // GRMZM2G143357 // GRMZM2G419806 // GRMZM2G428027 // GRMZM2G043453

// GRMZM2G017257 // GRMZM2G043453 // GRMZM2G419806 // GRMZM2G169462 // GRMZM2G180335

// GRMZM2G079381 // GRMZM2G079888 // GRMZM2G058760 // GRMZM2G428027 // GRMZM2G085078

// GRMZM2G409131 // GRMZM2G017555 // GRMZM2G139360 // AC177946.2\_FG004 // GRMZM2G459828 // GRMZM2G080375 // AC205100.3\_FG001 // GRMZM2G011743 // GRMZM2G046911 // GRMZM2G401970 // GRMZM2G131539 // GRMZM2G171713

// GRMZM2G409131 // GRMZM2G017555 // GRMZM2G139360 // AC177946.2\_FG004 // GRMZM2G459828 // GRMZM2G080375 // AC205100.3\_FG001 // GRMZM2G011743 // GRMZM2G046911 // GRMZM2G401970 // GRMZM2G131539 // GRMZM2G171713



// GRMZM2G409131 // GRMZM2G017555 // GRMZM2G139360 // GRMZM2G459828 // GRMZM2G080375 // AC205100.3\_FG001 // GRMZM2G011743 // GRMZM2G401970 // GRMZM2G171713

// GRMZM2G409131 // GRMZM2G459828 // GRMZM2G017555 // GRMZM2G401970 // GRMZM2G139360 // AC177946.2\_FG004 // GRMZM2G171713 // GRMZM2G134130 // GRMZM2G080375 // GRMZM2G108467 // AC205100.3\_FG001 // GRMZM2G017257 // GRMZM2G011743 // GRMZM2G046911 // AC190623.3\_FG001 // GRMZM2G428027 // GRMZM2G131539 // GRMZM2G472852

// GRMZM2G108467 // GRMZM2G058760 // AC190623.3\_FG001 // GRMZM2G472852 // GRMZM2G134130

// GRMZM2G108467 // GRMZM2G058760 // AC190623.3\_FG001 // GRMZM2G472852 // GRMZM2G134130

// GRMZM2G409131 // GRMZM2G017555 // GRMZM2G099696 // GRMZM2G139360 // AC177946.2\_FG004 // AC190623.3\_FG001 // GRMZM2G080375 // GRMZM2G108467 // AC205100.3\_FG001 // GRMZM2G011743 // GRMZM2G046911 // GRMZM2G459828 // GRMZM2G401970 // GRMZM2G131539 // GRMZM2G171713

// GRMZM2G080375 // GRMZM2G017555 // GRMZM2G099696 // GRMZM2G104613 // GRMZM2G409131 // GRMZM2G139360 // AC177946.2\_FG004 // AC190623.3\_FG001 // GRMZM2G050077 // GRMZM2G108467 // AC205100.3\_FG001 // GRMZM2G118345 // GRMZM2G011743 // GRMZM2G046911 // GRMZM2G459828 // GRMZM2G401970 // GRMZM2G131539 // GRMZM2G171713

// GRMZM2G409131 // GRMZM2G459828 // GRMZM2G017555 // GRMZM2G099696 // GRMZM2G401970 // GRMZM2G139360 // AC177946.2\_FG004 // GRMZM2G171713 // GRMZM2G134130 // GRMZM2G080375 // GRMZM2G108467 // AC205100.3\_FG001 // GRMZM2G017257 // GRMZM2G011743 // GRMZM2G046911 // AC190623.3\_FG001 // GRMZM2G428027 // GRMZM2G131539 // GRMZM2G472852

// GRMZM2G139360 // GRMZM2G134130 // GRMZM2G428027 // GRMZM2G131539 // GRMZM2G171713 // GRMZM2G017555 // GRMZM2G017257 // GRMZM2G058760 // AC190623.3\_FG001 // AC205100.3\_FG001 // GRMZM2G472852 // GRMZM2G104613 // AC177946.2\_FG004 // GRMZM2G080375 // GRMZM2G368388 // GRMZM2G033894 // GRMZM2G011743 // GRMZM2G046911 // GRMZM2G401970 // GRMZM2G409131 // GRMZM2G099696 // GRMZM2G459828 // GRMZM2G050077 // GRMZM2G108467 // GRMZM2G118345

// GRMZM2G058702 // GRMZM2G058760 // AC177946.2\_FG004 // GRMZM2G134130 // GRMZM2G108467 // GRMZM2G109743 // GRMZM2G165176 // GRMZM2G099382 // AC190623.3\_FG001 // GRMZM2G472852

// GRMZM2G108467 // GRMZM2G368388 // GRMZM2G428027 // GRMZM2G033894 // AC190623.3\_FG001

// GRMZM2G058702 // GRMZM2G134130 // GRMZM2G108467 // GRMZM2G109743 // GRMZM2G165176 // GRMZM2G099382 // AC190623.3\_FG001 // GRMZM2G472852

// GRMZM2G099696 // GRMZM2G017257 // GRMZM2G058760 // AC190623.3\_FG001 // GRMZM2G108467 // GRMZM2G368388 // GRMZM2G033894 // GRMZM2G428027 // GRMZM2G131539

// GRMZM2G139360 // GRMZM2G134130 // GRMZM2G428027 // GRMZM2G131539 // GRMZM2G171713 // GRMZM2G050939 // GRMZM2G017555 // GRMZM2G017257 // GRMZM2G058760 // AC190623.3\_FG001 // AC205100.3\_FG001 // GRMZM2G472852 // GRMZM2G104613 // AC177946.2\_FG004 // GRMZM2G080375 // GRMZM2G368388 // GRMZM2G033894 // GRMZM2G011743 // GRMZM2G046911 // GRMZM2G401970 // GRMZM2G409131 // GRMZM2G099696 // GRMZM2G459828 // GRMZM2G050077 // GRMZM2G108467 // GRMZM2G118345

// GRMZM2G058760 // AC190623.3\_FG001 // GRMZM2G108467 // GRMZM2G368388 // GRMZM2G033894 // GRMZM2G428027

// GRMZM2G099696 // GRMZM2G017257 // GRMZM2G058760 // AC190623.3\_FG001 // GRMZM2G108467 // GRMZM2G368388 // GRMZM2G033894 // GRMZM2G428027 // GRMZM2G131539

// GRMZM2G109743 // GRMZM2G134130 // GRMZM2G108467 // GRMZM2G058702 // GRMZM2G165176 // GRMZM2G099382

// GRMZM2G139360 // GRMZM2G134130 // GRMZM2G428027 // GRMZM2G131539 // GRMZM2G171713 // GRMZM2G058702 // GRMZM2G017555 // GRMZM2G017257 // GRMZM2G058760 // AC190623.3\_FG001 // AC205100.3\_FG001 // GRMZM2G472852 // GRMZM2G104613 // GRMZM2G050939 // AC177946.2\_FG004 // GRMZM2G080375 // GRMZM2G368388 // GRMZM2G033894 // GRMZM2G165176 // GRMZM2G099382 // GRMZM2G011743 // GRMZM2G046911 // GRMZM2G401970 // GRMZM2G409131 // GRMZM2G109743 // GRMZM2G099696 // GRMZM2G459828 // GRMZM2G050077 // GRMZM2G108467 // GRMZM2G118345

// GRMZM2G139360 // GRMZM2G134130 // GRMZM2G428027 // GRMZM2G131539 // GRMZM2G171713 // GRMZM2G058702 // GRMZM2G017555 // GRMZM2G017257 // GRMZM2G058760 // AC190623.3\_FG001 // AC205100.3\_FG001 // GRMZM2G472852 // GRMZM2G104613 // GRMZM2G050939 // AC177946.2\_FG004 // GRMZM2G080375 // GRMZM2G368388 // GRMZM2G033894 // GRMZM2G165176 // GRMZM2G099382 // GRMZM2G011743 // GRMZM2G046911 // GRMZM2G401970 // GRMZM2G409131 // GRMZM2G109743 // GRMZM2G099696 // GRMZM2G459828 // GRMZM2G050077 // GRMZM2G108467 // GRMZM2G118345

// GRMZM2G109743 // GRMZM2G134130 // GRMZM2G108467 // GRMZM2G058702 // GRMZM2G165176 // GRMZM2G099382

---
