# Supplementary material
Source: PubMed Central journal article supplement (PMC4453775)
Supplement: supp_pp.15.00025_00025supptbl7.pdf [file supp_pp.15.00025_00025supptbl7.pdf]

## README

This workbook contains genome-wide association hits for the 12 metabolic traits + 2 PCs of Zhang et al, "Genetic Architecture of Metabolic Traits in Maize". These GWAS hits were first published in Wallace et al 2014, PLoS Genet 10(12): e1004845. We have added

### *Explanation of column headers:*

|                   |                                                                                      |
|-------------------|--------------------------------------------------------------------------------------|
| trait             | Trait abbreviation                                                                   |
| v2_chrom/v3_chrom | Chromosome in AGPv2/v3 coordinates                                                   |
| v2_pos_v3_pos     | Basepair position in AGPv2/v3 coordinates                                            |
| rmip              | Resample model inclusion probability, meaning how many times out of 100 iterations 1 |
| dist_to_gene      | Distance to the nearest gene (from the maize Filtered Gene Set). A distance of 0 mea |
| nearest_gene      | The stable ID and (if available) brief annotation of the nearest gene                |

## README

ome-wide association study of carbon and nitrogen metabolism in the maize nested association map  
l the nearest gene and present the hits in both AGPv2 and AGPv3 genome coordinates

the SNP was detected. Only SNPs with RMIP $\geq$ 5 are included here.  
ns that the SNP is within an annotated gene.

## README

pping population.'
